# Supplementary material for: Precision environmental health monitoring by longitudinal exposome and multi-omics profiling
Source: Genome Res. 2022 Jun;32(6):1199–214. doi: 10.1101/gr.276521.121 (PMC9248886; doi:10.1101/gr.276521.121)
Supplement: Supplemental Material [file supp_gr.276521.121_Supplemental_Data_S1.xlsx]

## Sheet: environment_sample_info
Supplemental Data S1. All exposome and internal multi-omics data used in this study.
sample_id	STARTING_DATE	Axis1	Axis2	Axis3	Filter_No	batch	location	geo	geo2	duration	date.month	date.start	date.end	season	date.mid
2016-01-15	2016-01-15	-7248.64	32828.7	25823.2	202	11	Campus	uswest	Westcoast	2.84155	1	2016-01-15	2016-01-18	winter	2016-01-17
2016-01-18	2016-01-18	108591	-238278	5416.99	203	22	Campus	uswest	Westcoast	3.94248	1	2016-01-18	2016-01-22	winter	2016-01-20
2016-01-19	2016-01-19	200578	-495096	-17823.6	205	23	Campus	uswest	Westcoast	2.89051	1	2016-01-19	2016-01-22	winter	2016-01-21
2016-01-22	2016-01-22	144155	-292437	-11.7377	206	20	Campus	uswest	Westcoast	2.20949	1	2016-01-22	2016-01-25	winter	2016-01-24
2016-01-25	2016-01-25	67428.5	53512.5	-119354	207	14	Campus	uswest	Westcoast	3.44502	1	2016-01-25	2016-01-28	winter	2016-01-27
2016-02-19	2016-02-19	116956	-212825	14242.8	216	28	Campus	uswest	Westcoast	2.0787	2	2016-02-19	2016-02-21	winter	2016-02-20
2016-02-22	2016-02-22	38344.2	78740.4	17747.5	218	23	Campus	uswest	Westcoast	2.79965	2	2016-02-22	2016-02-25	winter	2016-02-24
2016-02-25	2016-02-25	35404.5	101230	29938.2	282	27	Bozeman-MT	uswest	Westcoast	1.66146	2	2016-02-25	2016-02-27	winter	2016-02-26
2016-02-27	2016-02-27	30384.3	87495.9	30227.3	281	25	Houston-TX	uswest	Southwest	3.32211	2	2016-02-27	2016-03-02	winter	2016-02-29
2016-03-03	2016-03-03	63203.7	-8107.62	29325.9	283	28	Campus	uswest	Westcoast	0.565162	3	2016-03-03	2016-03-07	spring	2016-03-05

## Sheet: environment_variable_info
Supplemental Data S1. All exposome and internal multi-omics data used in this study.
variable_id	true_name	unit
temperature	Temperature	℃
humid	Humidity	%
X_Mean_Sea_Level_PressurehPa	Atmospheric pressure	mbar
X_Mean_Wind_SpeedKm.h	Wind speed	mph
Overall.AQI.Value	Air Quality Index
dSO2	SO2	ppb
dNO2	NO2	ppb
dOzone	O3	ppb
dCO	CO	ppm
total.particle	TPM	μg/m3

## Sheet: environment_expression_data
Supplemental Data S1. All exposome and internal multi-omics data used in this study.
2016-01-15	2016-01-18	2016-01-19	2016-01-22	2016-01-25	2016-02-19	2016-02-22	2016-02-25	2016-02-27	2016-03-03
25.8634	23.7966	20.8832	23.7866	25.222	23.8834	25.1491	35.8005	29.5934	31.8173
46.0472	42.5858	41.6845	42.9932	42.5587	41.1607	31.6989	12.2789	38.1032	31.8152
1020.5	1019	1018	1021	1025.5	1023	1020	1022	1018	1014
10.5	10	14.5	12	6.5	11	5.5	7	11	14
26.5	28	30	34.5	53	38	46	22	61	31
0	0	0.5	0	0.5	0	1		1	0
23.5	27	27	26.5	34	27	39.5	8	37	17
21.5	27	25.5	29.5	13.5	34	27.5		44	31.5
10	10	11.5	10.5	14	10	13	3	6	7
27.8088	17.6052	18.6372	17.0209	30.5701	21.939	12.7001	32.2382	15.8718	14.4138

## Sheet: exposome_bio_sample_info
Supplemental Data S1. All exposome and internal multi-omics data used in this study.
sample_id	Axis1	Axis2	Axis3	Filter_No	batch	location	geo	geo2	duration	date.month	date.start	date.end	season	date.mid	particle	sd.particle	median.particle	total.particle	temperature	median.temperature	sd.temperature	humid	sd.humid	median.humid	weekend	STARTING_DATE	Max_TemperatureC	Mean_TemperatureC	Min_TemperatureC	Dew_PointC	MeanDew_PointC	Min_DewpointC	Max_Humidity	X_Mean_Humidity	X_Min_Humidity	X_Max_Sea_Level_PressurehPa	X_Mean_Sea_Level_PressurehPa	X_Min_Sea_Level_PressurehPa	X_Max_VisibilityKm	X_Mean_VisibilityKm	X_Min_VisibilitykM	X_Max_Wind_SpeedKm.h	X_Mean_Wind_SpeedKm.h	X_Max_Gust_SpeedKm.h	Precipitationmm	trees	weeds	grass	molds
chaoexpo22_I12	-7248.64	32828.7	25823.2	202	11	Campus	uswest	Westcoast	2.84155	1	2016-01-15	2016-01-18	winter	2016-01-17	9.78649	13.0693	7	27.8088	25.8634	25.7	1.32018	46.0472	5.66988	47.5	weekend	1/15/2016	17.5	14	13	14	13.5	12.5	100	88	74.5	1021.5	1020.5	1019	16	15.5	13	16	10.5		0	2	0	0	2
chaoexpo51_I6	108591	-238278	5416.99	203	22	Campus	uswest	Westcoast	3.94248	1	2016-01-18	2016-01-22	winter	2016-01-20	4.46552	1.35542	5	17.6052	23.7966	23.8	1.61466	42.5858	6.34937	43.3	weekday	1/18/2016	18	14	11	14	13	11	100	89	77	1022	1019	1016	16	14	6	21	10	45	0
chaoexpo56_I5	200578	-495096	-17823.6	205	23	Campus	uswest	Westcoast	2.89051	1	2016-01-19	2016-01-22	winter	2016-01-21	6.44771	1.85445	6	18.6372	20.8832	20.6	0.811473	41.6845	2.19037	41.4	weekday	1/19/2016	17.5	14	10.5	14	12.5	10.5	100	89.5	77	1021.5	1018	1015	16	15	8	26.5	14.5	45	0
chaoexpo44_I15	144155	-292437	-11.7377	206	20	Campus	uswest	Westcoast	2.20949	1	2016-01-22	2016-01-25	winter	2016-01-24	7.70356	15.9599	6	17.0209	23.7866	23.2	2.64121	42.9932	7.92276	41.8	weekend	1/22/2016	16	12.5	10	11	10.5	8	96.5	81	67	1022.5	1021	1018	16	16	13.5	20	12		0	2	0	0	1
chaoexpo28_I15	67428.5	53512.5	-119354	207	14	Campus	uswest	Westcoast	3.44502	1	2016-01-25	2016-01-28	winter	2016-01-27	8.87371	8.12452	8	30.5701	25.222	24.6	1.8115	42.5587	5.33296	44	weekday	1/25/2016	16	12	8	12	11	7.5	100	82	70	1027.5	1025.5	1024.5	16	15.5	13.5	15	6.5		0
chaoexpo74_I6	116956	-212825	14242.8	216	28	Campus	uswest	Westcoast	2.0787	2	2016-02-19	2016-02-21	winter	2016-02-20	10.5542	9.94955	8	21.939	23.8834	23.8	1.39434	41.1607	4.44173	42.8	weekday	2/19/2016	18	12	9	10	8	7	93	77	52	1024	1023	1021	16	15	11	21	11		0
chaoexpo56_I12	38344.2	78740.4	17747.5	218	23	Campus	uswest	Westcoast	2.79965	2	2016-02-22	2016-02-25	winter	2016-02-24	4.53632	6.53952	3	12.7001	25.1491	25.1	2.50738	31.6989	7.59084	32.8	weekday	2/22/2016	21	13	6.5	11	8.5	4.5	90	66.5	49	1021.5	1020	1018.5	16	16	16	16.5	5.5		0	2	0	0	1
chaoexpo70_I6	35404.5	101230	29938.2	282	27	Bozeman-MT	uswest	Westcoast	1.66146	2	2016-02-25	2016-02-27	winter	2016-02-26	19.4036	11.5868	18	32.2382	35.8005	33.2	5.9919	12.2789	3.24435	13	weekday	2/25/2016	16	4	-6	-4	-6	-8	81	53	24	1028	1022	1015	16	16	16	16	7	19	0
chaoexpo62_I6	30384.3	87495.9	30227.3	281	25	Houston-TX	uswest	Southwest	3.32211	2	2016-02-27	2016-03-02	winter	2016-02-29	4.77762	3.61202	3	15.8718	29.5934	30.4	1.97465	38.1032	10.9419	38.7	weekday	2/27/2016	24	18	13	18	11	8	94	67	38	1021	1018	1015	16	16	10	29	11	37	0
chaoexpo75_I12	63203.7	-8107.62	29325.9	283	28	Campus	uswest	Westcoast	0.565162	3	2016-03-03	2016-03-07	spring	2016-03-05	7.80975	12.8428	6	4.41377	31.8173	29.8	6.0939	31.8152	6.22923	32.1	weekend	3/3/2016	19	17	14	15	13	11	88	78	68	1016	1014	1011	16	16	11	24	14	49	0
[truncated: 84 more columns]

## Sheet: exposome_bio_variable_info
Supplemental Data S1. All exposome and internal multi-omics data used in this study.
variable_id	short_name	level
family_Stereaceae	Stereaceae	family
family_Pinaceae	Pinaceae	family
family_Aspergillaceae	Aspergillaceae	family
family_Sporormiaceae	Sporormiaceae	family
family_Propionibacteriaceae	Propionibacteriaceae	family
family_Coriolaceae	Coriolaceae	family
family_Staphylococcaceae	Staphylococcaceae	family
family_Bacillaceae	Bacillaceae	family
family_Enterobacteriaceae	Enterobacteriaceae	family
family_Trichocomaceae	Trichocomaceae	family
family_Moraxellaceae	Moraxellaceae	family
family_Malasseziaceae	Malasseziaceae	family
family_Sclerotiniaceae	Sclerotiniaceae	family
family_Poaceae	Poaceae	family
family_Hydnodontaceae	Hydnodontaceae	family
family_Fagaceae	Fagaceae	family
family_Pleosporaceae	Pleosporaceae	family
family_Oleaceae	Oleaceae	family
family_Streptococcaceae	Streptococcaceae	family
family_Corynebacteriaceae	Corynebacteriaceae	family
family_Phanerochaetaceae	Phanerochaetaceae	family
family_Melampsoraceae	Melampsoraceae	family
family_Atheliaceae	Atheliaceae	family
family_Canidae	Canidae	family
family_Cladosporiaceae	Cladosporiaceae	family
family_Corticiaceae	Corticiaceae	family
family_Musaceae	Musaceae	family
family_Mycobacteriaceae	Mycobacteriaceae	family
family_Betulaceae	Betulaceae	family
family_Actinomycetaceae	Actinomycetaceae	family
family_Omphalotaceae	Omphalotaceae	family
family_Hymenochaetaceae	Hymenochaetaceae	family
family_Ustilaginaceae	Ustilaginaceae	family
family_Pseudomonadaceae	Pseudomonadaceae	family
family_Aureobasidiaceae	Aureobasidiaceae	family
family_Rhizopogonaceae	Rhizopogonaceae	family
family_Mycosphaerellaceae	Mycosphaerellaceae	family
family_Tricholomataceae	Tricholomataceae	family
family_Trichinellidae	Trichinellidae	family
family_Amaranthaceae	Amaranthaceae	family
family_Nectriaceae	Nectriaceae	family
family_Cronartiaceae	Cronartiaceae	family
family_Cytophagaceae	Cytophagaceae	family
family_Didymellaceae	Didymellaceae	family
family_Cannabaceae	Cannabaceae	family
family_Atopobiaceae	Atopobiaceae	family
family_Pasteurellaceae	Pasteurellaceae	family
family_Alcaligenaceae	Alcaligenaceae	family
family_Herpotrichiellaceae	Herpotrichiellaceae	family
family_Tremellaceae	Tremellaceae	family
family_Paenibacillaceae	Paenibacillaceae	family
family_Solanaceae	Solanaceae	family
family_Sordariaceae	Sordariaceae	family
family_Pseudeurotiaceae	Pseudeurotiaceae	family
family_Myxotrichaceae	Myxotrichaceae	family
family_Siphoviridae	Siphoviridae	family
family_Chitinophagaceae	Chitinophagaceae	family
family_Thermoactinomycetaceae	Thermoactinomycetaceae	family
family_Gnomoniaceae	Gnomoniaceae	family
family_Pleurotaceae	Pleurotaceae	family
family_Cordycipitaceae	Cordycipitaceae	family
family_Thermoascaceae	Thermoascaceae	family
family_Sphingobacteriaceae	Sphingobacteriaceae	family
family_Flavobacteriaceae	Flavobacteriaceae	family
family_Peniophoraceae	Peniophoraceae	family
family_Helotiaceae	Helotiaceae	family
family_Pucciniaceae	Pucciniaceae	family
family_Filobasidiaceae	Filobasidiaceae	family
family_Micrococcaceae	Micrococcaceae	family
family_Dolichopodidae	Dolichopodidae	family
family_Agaricaceae	Agaricaceae	family
family_Culicidae	Culicidae	family
family_Ancylostomatidae	Ancylostomatidae	family
family_Agromyzidae	Agromyzidae	family
family_Adinetidae	Adinetidae	family
family_Cryphonectriaceae	Cryphonectriaceae	family
family_Lachnospiraceae	Lachnospiraceae	family
family_Marchantiaceae	Marchantiaceae	family
family_Apiaceae	Apiaceae	family
family_Bondarzewiaceae	Bondarzewiaceae	family
family_Calliphoridae	Calliphoridae	family
family_Rhodobacteraceae	Rhodobacteraceae	family
family_Schizophyllaceae	Schizophyllaceae	family
family_Cucurbitariaceae	Cucurbitariaceae	family
family_Debaryomycetaceae	Debaryomycetaceae	family
family_Phaffomycetaceae	Phaffomycetaceae	family
family_Triopsidae	Triopsidae	family
family_Enterococcaceae	Enterococcaceae	family
family_Prevotellaceae	Prevotellaceae	family
family_Rosaceae	Rosaceae	family
family_Juglandaceae	Juglandaceae	family
family_Xylariaceae	Xylariaceae	family
family_Polyporaceae	Polyporaceae	family
family_Nostocaceae	Nostocaceae	family
family_Tephritidae	Tephritidae	family
family_Didymosphaeriaceae	Didymosphaeriaceae	family
family_Clostridiaceae	Clostridiaceae	family
family_Botryobasidiaceae	Botryobasidiaceae	family
family_Sphingomonadaceae	Sphingomonadaceae	family
family_Felidae	Felidae	family
family_Lentinaceae	Lentinaceae	family
family_Hypocreaceae	Hypocreaceae	family
family_Nelumbonaceae	Nelumbonaceae	family
family_Peptoniphilaceae	Peptoniphilaceae	family
family_Phaeosphaeriaceae	Phaeosphaeriaceae	family
family_Fomitopsidaceae	Fomitopsidaceae	family
family_Phytoseiidae	Phytoseiidae	family
family_Myoviridae	Myoviridae	family
family_Diaporthaceae	Diaporthaceae	family
family_Strophariaceae	Strophariaceae	family
family_Fabaceae	Fabaceae	family
family_Pedaliaceae	Pedaliaceae	family
family_Dermateaceae	Dermateaceae	family
family_Planococcaceae	Planococcaceae	family
family_Crepidotaceae	Crepidotaceae	family
family_Lactobacillaceae	Lactobacillaceae	family
family_Sporidiobolaceae	Sporidiobolaceae	family
family_Diopsidae	Diopsidae	family
family_Clavicipitaceae	Clavicipitaceae	family
family_Moraceae	Moraceae	family
family_Lyophyllaceae	Lyophyllaceae	family
family_Sepsidae	Sepsidae	family
family_Melanommataceae	Melanommataceae	family
family_Erysipelotrichaceae	Erysipelotrichaceae	family
family_Sympoventuriaceae	Sympoventuriaceae	family
family_Burkholderiaceae	Burkholderiaceae	family
family_Oxytrichidae	Oxytrichidae	family
family_Listeriaceae	Listeriaceae	family
family_Comamonadaceae	Comamonadaceae	family
family_Physalacriaceae	Physalacriaceae	family
family_Peptococcaceae	Peptococcaceae	family
family_Rhizopodaceae	Rhizopodaceae	family
family_Meruliaceae	Meruliaceae	family
family_Chaetomiaceae	Chaetomiaceae	family
family_Veillonellaceae	Veillonellaceae	family
family_Tulasnellaceae	Tulasnellaceae	family
family_Sporolactobacillaceae	Sporolactobacillaceae	family
family_Streptomycetaceae	Streptomycetaceae	family
family_Myxobolidae	Myxobolidae	family
family_Aerococcaceae	Aerococcaceae	family
family_Diatrypaceae	Diatrypaceae	family
family_Psychodidae	Psychodidae	family
family_Pediculidae	Pediculidae	family
family_Bromeliaceae	Bromeliaceae	family
family_Orbiliaceae	Orbiliaceae	family
family_Rutaceae	Rutaceae	family
family_Ruminococcaceae	Ruminococcaceae	family
family_Valsaceae	Valsaceae	family
family_Funariaceae	Funariaceae	family
family_Caligidae	Caligidae	family
family_Scenedesmaceae	Scenedesmaceae	family
family_Cystofilobasidiaceae	Cystofilobasidiaceae	family
family_Neisseriaceae	Neisseriaceae	family
family_Microchaetaceae	Microchaetaceae	family
family_Psyllidae	Psyllidae	family
family_Deinococcaceae	Deinococcaceae	family
family_Ceratobasidiaceae	Ceratobasidiaceae	family
family_Vitaceae	Vitaceae	family
family_Malvaceae	Malvaceae	family
family_Tilletiaceae	Tilletiaceae	family
family_Trichosporonaceae	Trichosporonaceae	family
family_Circoviridae	Circoviridae	family
family_Carnobacteriaceae	Carnobacteriaceae	family
family_Saccharomycetaceae	Saccharomycetaceae	family
family_Cucurbitaceae	Cucurbitaceae	family
family_Bacteroidaceae	Bacteroidaceae	family
family_Amborellaceae	Amborellaceae	family
family_Trueperaceae	Trueperaceae	family
family_Rutstroemiaceae	Rutstroemiaceae	family
family_Brassicaceae	Brassicaceae	family
family_Psathyrellaceae	Psathyrellaceae	family
family_Euphorbiaceae	Euphorbiaceae	family
family_Arecaceae	Arecaceae	family
family_Acetobacteraceae	Acetobacteraceae	family
family_Ophiocordycipitaceae	Ophiocordycipitaceae	family
family_Pyroglyphidae	Pyroglyphidae	family
family_Ephydridae	Ephydridae	family
family_Paxillaceae	Paxillaceae	family
family_Leucosporidiaceae	Leucosporidiaceae	family
family_Ganodermataceae	Ganodermataceae	family
family_Amanitaceae	Amanitaceae	family
family_Teratosphaeriaceae	Teratosphaeriaceae	family
family_Oxalobacteraceae	Oxalobacteraceae	family
family_Asteraceae	Asteraceae	family
family_Ophiostomataceae	Ophiostomataceae	family
family_Lichtheimiaceae	Lichtheimiaceae	family
family_Scytonemataceae	Scytonemataceae	family
family_Gloeophyllaceae	Gloeophyllaceae	family
family_Brachybasidiaceae	Brachybasidiaceae	family
family_Punctulariaceae	Punctulariaceae	family
family_Physaraceae	Physaraceae	family
family_Phasianidae	Phasianidae	family
family_Xanthomonadaceae	Xanthomonadaceae	family
family_Cladoniaceae	Cladoniaceae	family
family_Actinidiaceae	Actinidiaceae	family
family_Cunninghamellaceae	Cunninghamellaceae	family
family_Thripidae	Thripidae	family
family_Venturiaceae	Venturiaceae	family
family_Amphisiellidae	Amphisiellidae	family
family_Halictidae	Halictidae	family
family_Massarinaceae	Massarinaceae	family
family_Spirochaetaceae	Spirochaetaceae	family
family_Ceraceosoraceae	Ceraceosoraceae	family
family_Onchocercidae	Onchocercidae	family
family_Bifidobacteriaceae	Bifidobacteriaceae	family
family_Tuberaceae	Tuberaceae	family
family_Chaoboridae	Chaoboridae	family
family_Botryosphaeriaceae	Botryosphaeriaceae	family
family_Ajellomycetaceae	Ajellomycetaceae	family
family_Urostylidae	Urostylidae	family
family_Parameciidae	Parameciidae	family
family_Cystobasidiaceae	Cystobasidiaceae	family
family_Erythrobasidiaceae	Erythrobasidiaceae	family
family_Gloniaceae	Gloniaceae	family
family_Salicaceae	Salicaceae	family
family_Lamiaceae	Lamiaceae	family
family_Hyaloscyphaceae	Hyaloscyphaceae	family
family_Pseudoalteromonadaceae	Pseudoalteromonadaceae	family
family_Geodermatophilaceae	Geodermatophilaceae	family
family_Cortinariaceae	Cortinariaceae	family
family_Dipodascaceae	Dipodascaceae	family
family_Alicyclobacillaceae	Alicyclobacillaceae	family
family_Pisolithaceae	Pisolithaceae	family
family_Marasmiaceae	Marasmiaceae	family
family_Phyllobacteriaceae	Phyllobacteriaceae	family
family_Glomerellaceae	Glomerellaceae	family
family_Umbilicariaceae	Umbilicariaceae	family
family_Sporocadaceae	Sporocadaceae	family
family_Exidiaceae	Exidiaceae	family
family_Apidae	Apidae	family
family_Arthrodermataceae	Arthrodermataceae	family
family_Corynesporascaceae	Corynesporascaceae	family
family_Clavariaceae	Clavariaceae	family
family_Legionellaceae	Legionellaceae	family
family_Pseudonocardiaceae	Pseudonocardiaceae	family
family_Phycodnaviridae	Phycodnaviridae	family
family_Aphididae	Aphididae	family
family_Ericaceae	Ericaceae	family
family_Jaapiaceae	Jaapiaceae	family
family_Formicidae	Formicidae	family
family_Peptostreptococcaceae	Peptostreptococcaceae	family
family_Microdochiaceae	Microdochiaceae	family
family_Plectosphaerellaceae	Plectosphaerellaceae	family
family_Aeromonadaceae	Aeromonadaceae	family
family_Leptosphaeriaceae	Leptosphaeriaceae	family
family_Coniophoraceae	Coniophoraceae	family
family_Togniniaceae	Togniniaceae	family
family_Salmonidae	Salmonidae	family
family_Erysiphaceae	Erysiphaceae	family
family_Microviridae	Microviridae	family
family_Eimeriidae	Eimeriidae	family
family_Spheniscidae	Spheniscidae	family
family_Rivulariaceae	Rivulariaceae	family
family_Hysteriaceae	Hysteriaceae	family
family_Sphaerobolaceae	Sphaerobolaceae	family
family_Eubacteriaceae	Eubacteriaceae	family
family_Meliaceae	Meliaceae	family
family_Curculionidae	Curculionidae	family
family_Pluteaceae	Pluteaceae	family
family_Porphyromonadaceae	Porphyromonadaceae	family
family_Bionectriaceae	Bionectriaceae	family
family_Thermaceae	Thermaceae	family
family_Klebsormidiaceae	Klebsormidiaceae	family
family_Serpulaceae	Serpulaceae	family
family_Argynnaceae	Argynnaceae	family
family_Chlamydiaceae	Chlamydiaceae	family
family_Dacrymycetaceae	Dacrymycetaceae	family
family_Leuconostocaceae	Leuconostocaceae	family
family_Taphrinaceae	Taphrinaceae	family
family_Methanobacteriaceae	Methanobacteriaceae	family
family_Auriculariaceae	Auriculariaceae	family
family_Amoebophilaceae	Amoebophilaceae	family
family_Vibrionaceae	Vibrionaceae	family
family_Myrtaceae	Myrtaceae	family
family_Cryptosporidiidae	Cryptosporidiidae	family
family_Muridae	Muridae	family
family_Clostridiales Family XIII. Incertae Sedis	Clostridiales Family XIII. Incertae Sedis	family
family_Onygenaceae	Onygenaceae	family
family_Teloschistaceae	Teloschistaceae	family
family_Puniceicoccaceae	Puniceicoccaceae	family
family_Rhodospirillaceae	Rhodospirillaceae	family
family_Cleomaceae	Cleomaceae	family
family_Desulfarculaceae	Desulfarculaceae	family
family_Hyphomonadaceae	Hyphomonadaceae	family
family_Sciuridae	Sciuridae	family
family_Methylophilaceae	Methylophilaceae	family
family_Methylobacteriaceae	Methylobacteriaceae	family
family_Intrasporangiaceae	Intrasporangiaceae	family
family_Drosophilidae	Drosophilidae	family
family_Pneumocystidaceae	Pneumocystidaceae	family
family_Methanosarcinaceae	Methanosarcinaceae	family
family_Hyphomicrobiaceae	Hyphomicrobiaceae	family
family_Cyclobacteriaceae	Cyclobacteriaceae	family
family_Nymphalidae	Nymphalidae	family
family_Magnaporthaceae	Magnaporthaceae	family
family_Rhizobiaceae	Rhizobiaceae	family
family_Bradyrhizobiaceae	Bradyrhizobiaceae	family
family_Coccomyxaceae	Coccomyxaceae	family
family_Coxiellaceae	Coxiellaceae	family
family_Cellvibrionaceae	Cellvibrionaceae	family
family_Baculoviridae	Baculoviridae	family
family_Campylobacteraceae	Campylobacteraceae	family
family_Nocardiaceae	Nocardiaceae	family
family_Cyphellophoraceae	Cyphellophoraceae	family
family_Shewanellaceae	Shewanellaceae	family
family_Cidaridae	Cidaridae	family
family_Macrostomidae	Macrostomidae	family
family_Plutellidae	Plutellidae	family
family_Halomonadaceae	Halomonadaceae	family
family_Stachybotriaceae	Stachybotriaceae	family
family_Syntrophomonadaceae	Syntrophomonadaceae	family
family_Acidobacteriaceae	Acidobacteriaceae	family
family_Lymnaeidae	Lymnaeidae	family
family_Verrucariaceae	Verrucariaceae	family
family_Podoviridae	Podoviridae	family
family_Primulaceae	Primulaceae	family
family_Syrphidae	Syrphidae	family
family_Saccharomycodaceae	Saccharomycodaceae	family
family_Rhamnaceae	Rhamnaceae	family
family_Suillaceae	Suillaceae	family
family_Nocardiopsaceae	Nocardiopsaceae	family
family_Ktedonobacteraceae	Ktedonobacteraceae	family
family_Microascaceae	Microascaceae	family
family_Ixodidae	Ixodidae	family
family_Hypochthoniidae	Hypochthoniidae	family
family_Flammeovirgaceae	Flammeovirgaceae	family
family_Mucoraceae	Mucoraceae	family
family_Lasiosphaeriaceae	Lasiosphaeriaceae	family
family_Achipteriidae	Achipteriidae	family
family_Rubritaleaceae	Rubritaleaceae	family
family_Microbacteriaceae	Microbacteriaceae	family
family_Tilletiariaceae	Tilletiariaceae	family
family_Caldilineaceae	Caldilineaceae	family
family_Orchidaceae	Orchidaceae	family
family_Leptotrichiaceae	Leptotrichiaceae	family
family_Capnodiaceae	Capnodiaceae	family
family_Caulobacteraceae	Caulobacteraceae	family
family_Verrucomicrobia subdivision 3	Verrucomicrobia subdivision 3	family
family_Reticulascaceae	Reticulascaceae	family
family_Geometridae	Geometridae	family
family_Polygonaceae	Polygonaceae	family
family_Porticoccaceae	Porticoccaceae	family
family_Chromatiaceae	Chromatiaceae	family
family_Bdellovibrionaceae	Bdellovibrionaceae	family
family_Saprospiraceae	Saprospiraceae	family
family_Fusobacteriaceae	Fusobacteriaceae	family
family_Fistulinaceae	Fistulinaceae	family
family_Ectobiidae	Ectobiidae	family
family_Chionosphaeraceae	Chionosphaeraceae	family
family_Solibacteraceae	Solibacteraceae	family
family_Sclerodermataceae	Sclerodermataceae	family
family_Halobacteriaceae	Halobacteriaceae	family
family_Phyllostictaceae	Phyllostictaceae	family
family_Plasmodiidae	Plasmodiidae	family
family_Edwardsiidae	Edwardsiidae	family
family_Verrucomicrobiaceae	Verrucomicrobiaceae	family
family_Methylococcaceae	Methylococcaceae	family
family_Boletinellaceae	Boletinellaceae	family
family_Xylonomycetaceae	Xylonomycetaceae	family
family_Planctomycetaceae	Planctomycetaceae	family
family_Schistosomatidae	Schistosomatidae	family
family_Tetranychidae	Tetranychidae	family
family_Piscirickettsiaceae	Piscirickettsiaceae	family
family_Halieaceae	Halieaceae	family
family_Oceanospirillaceae	Oceanospirillaceae	family
family_Syncephalastraceae	Syncephalastraceae	family
family_Priapulidae	Priapulidae	family
family_Frankiaceae	Frankiaceae	family
family_Lentibulariaceae	Lentibulariaceae	family
family_Prolixibacteraceae	Prolixibacteraceae	family
family_Micromonosporaceae	Micromonosporaceae	family
family_Thermoanaerobacteraceae	Thermoanaerobacteraceae	family
family_Haemonchidae	Haemonchidae	family
family_Steganacaridae	Steganacaridae	family
family_Nitrosopumilaceae	Nitrosopumilaceae	family
family_Camisiidae	Camisiidae	family
family_Cryomorphaceae	Cryomorphaceae	family
family_Dermabacteraceae	Dermabacteraceae	family
family_Entomobryidae	Entomobryidae	family
family_Nocardioidaceae	Nocardioidaceae	family
family_Cimicidae	Cimicidae	family
family_Chordariaceae	Chordariaceae	family
family_Columbidae	Columbidae	family
family_Thermomonosporaceae	Thermomonosporaceae	family
family_Rubrobacteraceae	Rubrobacteraceae	family
family_Brevibacteriaceae	Brevibacteriaceae	family
family_Dietziaceae	Dietziaceae	family
family_Leptospiraceae	Leptospiraceae	family
family_Convolvulaceae	Convolvulaceae	family
family_Cyprinidae	Cyprinidae	family
family_Coriobacteriaceae	Coriobacteriaceae	family
family_Caryophyllaceae	Caryophyllaceae	family
family_Trypanosomatidae	Trypanosomatidae	family
family_Geobacteraceae	Geobacteraceae	family
family_Plantaginaceae	Plantaginaceae	family
family_Psychromonadaceae	Psychromonadaceae	family
family_Chironomidae	Chironomidae	family
family_Erythrobacteraceae	Erythrobacteraceae	family
family_Gekkonidae	Gekkonidae	family
family_Pleurobrachiidae	Pleurobrachiidae	family
family_Desulfobacteraceae	Desulfobacteraceae	family
family_Peronosporaceae	Peronosporaceae	family
family_Williamsiaceae	Williamsiaceae	family
family_Pelagibacteraceae	Pelagibacteraceae	family
family_Temoridae	Temoridae	family
family_Cellulomonadaceae	Cellulomonadaceae	family
family_Braconidae	Braconidae	family
family_Chthoniobacteraceae	Chthoniobacteraceae	family
family_Bartonellaceae	Bartonellaceae	family
family_Sphaerobacteraceae	Sphaerobacteraceae	family
family_Alteromonadaceae	Alteromonadaceae	family
family_Thymelaeaceae	Thymelaeaceae	family
family_Geminibasidiaceae	Geminibasidiaceae	family
family_Parachlamydiaceae	Parachlamydiaceae	family
family_Aurantimonadaceae	Aurantimonadaceae	family
family_Buprestidae	Buprestidae	family
family_Brucellaceae	Brucellaceae	family
family_Nitrosomonadaceae	Nitrosomonadaceae	family
family_Buthidae	Buthidae	family
family_Japygidae	Japygidae	family
family_Thiotrichaceae	Thiotrichaceae	family
family_Limulidae	Limulidae	family
family_Ceratocystidaceae	Ceratocystidaceae	family
family_Opitutaceae	Opitutaceae	family
family_Mimiviridae	Mimiviridae	family
family_Gesneriaceae	Gesneriaceae	family
family_Colwelliaceae	Colwelliaceae	family
family_Metschnikowiaceae	Metschnikowiaceae	family
family_Chlorobiaceae	Chlorobiaceae	family
family_Thermoanaerobacterales Family III. Incertae Sedis	Thermoanaerobacterales Family III. Incertae Sedis	family
family_Cystobacteraceae	Cystobacteraceae	family
family_Cecidomyiidae	Cecidomyiidae	family
family_Oscillospiraceae	Oscillospiraceae	family
family_Eggerthellaceae	Eggerthellaceae	family
family_Dermacoccaceae	Dermacoccaceae	family
family_Desulfobulbaceae	Desulfobulbaceae	family
family_Trichogrammatidae	Trichogrammatidae	family
family_Rhodocyclaceae	Rhodocyclaceae	family
family_Spizellomycetaceae	Spizellomycetaceae	family
family_Octopodidae	Octopodidae	family
family_Silphidae	Silphidae	family
family_Plasmodiophoridae	Plasmodiophoridae	family
family_Jiangellaceae	Jiangellaceae	family
family_Branchiostomidae	Branchiostomidae	family
family_Eresidae	Eresidae	family
family_Gregarinidae	Gregarinidae	family
family_Phrymaceae	Phrymaceae	family
family_Caldicoprobacteraceae	Caldicoprobacteraceae	family
family_Alloascoideaceae	Alloascoideaceae	family
family_Apocynaceae	Apocynaceae	family
family_Mortierellaceae	Mortierellaceae	family
family_Clupeidae	Clupeidae	family
family_Pontederiaceae	Pontederiaceae	family
family_Planorbidae	Planorbidae	family
family_Promicromonosporaceae	Promicromonosporaceae	family
family_Marinilabiliaceae	Marinilabiliaceae	family
family_Ascarididae	Ascarididae	family
family_Paridae	Paridae	family
family_Blattabacteriaceae	Blattabacteriaceae	family
family_Haloplasmataceae	Haloplasmataceae	family
family_Candidatus Paracaedibacteraceae	Candidatus Paracaedibacteraceae	family
family_Gondwanamycetaceae	Gondwanamycetaceae	family
family_Streptosporangiaceae	Streptosporangiaceae	family
family_Delphacidae	Delphacidae	family
family_Heteroderidae	Heteroderidae	family
family_Caviidae	Caviidae	family
family_Umbelopsidaceae	Umbelopsidaceae	family
family_Roseiflexaceae	Roseiflexaceae	family
family_Thermogemmatisporaceae	Thermogemmatisporaceae	family
family_Herpetosiphonaceae	Herpetosiphonaceae	family
family_Pteromalidae	Pteromalidae	family
family_Cichlidae	Cichlidae	family
family_Cerambycidae	Cerambycidae	family
family_Nosematidae	Nosematidae	family
family_Tetraodontidae	Tetraodontidae	family
family_Lycaenidae	Lycaenidae	family
family_Poeciliidae	Poeciliidae	family
family_Theridiidae	Theridiidae	family
family_Nitrospiraceae	Nitrospiraceae	family
family_Polystomatidae	Polystomatidae	family
family_Thalassiosiraceae	Thalassiosiraceae	family
family_Spongiibacteraceae	Spongiibacteraceae	family
family_Scarabaeidae	Scarabaeidae	family
family_Monodopsidaceae	Monodopsidaceae	family
family_Acholeplasmataceae	Acholeplasmataceae	family
family_Helicobacteraceae	Helicobacteraceae	family
family_Selaginellaceae	Selaginellaceae	family
family_Chromobacteriaceae	Chromobacteriaceae	family
family_Rickettsiaceae	Rickettsiaceae	family
family_Alcanivoracaceae	Alcanivoracaceae	family
family_Linotaeniidae	Linotaeniidae	family
family_Noctuidae	Noctuidae	family
family_Daphniidae	Daphniidae	family
family_Varroidae	Varroidae	family
family_Mamiellaceae	Mamiellaceae	family
family_Kineosporiaceae	Kineosporiaceae	family
family_Microbotryaceae	Microbotryaceae	family
family_Linaceae	Linaceae	family
family_Scatopsidae	Scatopsidae	family
family_Syntrophobacteraceae	Syntrophobacteraceae	family
family_Idiomarinaceae	Idiomarinaceae	family
family_Nakamurellaceae	Nakamurellaceae	family
family_Beijerinckiaceae	Beijerinckiaceae	family
family_Isosphaeraceae	Isosphaeraceae	family
family_Pyralidae	Pyralidae	family
family_Laminariaceae	Laminariaceae	family
family_Marinifilaceae	Marinifilaceae	family
family_Clostridiales Family XVII. Incertae Sedis	Clostridiales Family XVII. Incertae Sedis	family
family_Sarcocystidae	Sarcocystidae	family
family_Anaerolineaceae	Anaerolineaceae	family
family_Balneolaceae	Balneolaceae	family
family_Acrididae	Acrididae	family
family_Gordoniaceae	Gordoniaceae	family
family_Ignavibacteriaceae	Ignavibacteriaceae	family
family_Cicadellidae	Cicadellidae	family
family_Akkermansiaceae	Akkermansiaceae	family
family_Thermithiobacillaceae	Thermithiobacillaceae	family
family_Pieridae	Pieridae	family
family_Microthrixaceae	Microthrixaceae	family
family_Ancylistaceae	Ancylistaceae	family
family_Asilidae	Asilidae	family
family_Adrianichthyidae	Adrianichthyidae	family
family_Symbiobacteriaceae	Symbiobacteriaceae	family
family_Prochlorococcaceae	Prochlorococcaceae	family
family_Bathycoccaceae	Bathycoccaceae	family
family_Limnephilidae	Limnephilidae	family
family_Sinobacteraceae	Sinobacteraceae	family
family_Phaeodactylaceae	Phaeodactylaceae	family
family_Acidaminococcaceae	Acidaminococcaceae	family
family_Rikenellaceae	Rikenellaceae	family
family_Heteropediaceae	Heteropediaceae	family
family_Acidithiobacillaceae	Acidithiobacillaceae	family
family_Papillomaviridae	Papillomaviridae	family
family_Tipulidae	Tipulidae	family
family_Tenebrionidae	Tenebrionidae	family
family_Ostreidae	Ostreidae	family
family_Acidimicrobiaceae	Acidimicrobiaceae	family
family_Toxocaridae	Toxocaridae	family
family_Caricaceae	Caricaceae	family
family_Reduviidae	Reduviidae	family
family_Chlorellaceae	Chlorellaceae	family
family_Bombycidae	Bombycidae	family
family_Hydridae	Hydridae	family
family_Glossinidae	Glossinidae	family
family_Lentisphaeraceae	Lentisphaeraceae	family
family_Myxococcaceae	Myxococcaceae	family
family_Mycoplasmataceae	Mycoplasmataceae	family
family_Bacillales Family X. Incertae Sedis	Bacillales Family X. Incertae Sedis	family
family_Glycomycetaceae	Glycomycetaceae	family
family_Opisthocomidae	Opisthocomidae	family
family_Polyomaviridae	Polyomaviridae	family
family_Vespidae	Vespidae	family
family_Pichiaceae	Pichiaceae	family
family_Holosporaceae	Holosporaceae	family
family_Prorocentraceae	Prorocentraceae	family
family_Crambidae	Crambidae	family
family_Methanosaetaceae	Methanosaetaceae	family
family_Sarcophagidae	Sarcophagidae	family
family_Aplysiidae	Aplysiidae	family
family_Strongylocentrotidae	Strongylocentrotidae	family
family_Mytilidae	Mytilidae	family
family_Corvidae	Corvidae	family
family_Natrialbaceae	Natrialbaceae	family
family_Cardiobacteriaceae	Cardiobacteriaceae	family
family_Candidatus Methanoperedenaceae	Candidatus Methanoperedenaceae	family
family_Moritellaceae	Moritellaceae	family
genus_Stereum	Stereum	genus
genus_Pinus	Pinus	genus
genus_Aspergillus	Aspergillus	genus
genus_Penicillium	Penicillium	genus
genus_Preussia	Preussia	genus
genus_Propionibacterium	Propionibacterium	genus
genus_Staphylococcus	Staphylococcus	genus
genus_Trametes	Trametes	genus
genus_Talaromyces	Talaromyces	genus
genus_Bacillus	Bacillus	genus
genus_Malassezia	Malassezia	genus
genus_Botrytis	Botrytis	genus
genus_Acinetobacter	Acinetobacter	genus
genus_Sistotremastrum	Sistotremastrum	genus
genus_Fraxinus	Fraxinus	genus
genus_Corynebacterium	Corynebacterium	genus
genus_Streptococcus	Streptococcus	genus
genus_Alternaria	Alternaria	genus
genus_Melampsora	Melampsora	genus
genus_Quercus	Quercus	genus
genus_Escherichia	Escherichia	genus
genus_Canis	Canis	genus
genus_Cladosporium	Cladosporium	genus
genus_Schizopora	Schizopora	genus
genus_Fibulorhizoctonia	Fibulorhizoctonia	genus
genus_Mycobacterium	Mycobacterium	genus
genus_Musa	Musa	genus
genus_Betula	Betula	genus
genus_Phanerochaete	Phanerochaete	genus
genus_Phialocephala	Phialocephala	genus
genus_Pseudomonas	Pseudomonas	genus
genus_Aureobasidium	Aureobasidium	genus
genus_Ustilago	Ustilago	genus
genus_Rhizopogon	Rhizopogon	genus
genus_Tilletiopsis	Tilletiopsis	genus
genus_Trichinella	Trichinella	genus
genus_Phytophthora	Phytophthora	genus
genus_Cronartium	Cronartium	genus
genus_Amaranthus	Amaranthus	genus
genus_Fusarium	Fusarium	genus
genus_Atopobium	Atopobium	genus
genus_Baeospora	Baeospora	genus
genus_Phlebiopsis	Phlebiopsis	genus
genus_Humulus	Humulus	genus
genus_Mobiluncus	Mobiluncus	genus
genus_Neurospora	Neurospora	genus
genus_Alcaligenes	Alcaligenes	genus
genus_Pseudogymnoascus	Pseudogymnoascus	genus
genus_Paenibacillus	Paenibacillus	genus
genus_Triticum	Triticum	genus
genus_Capsicum	Capsicum	genus
genus_Filobasidiella	Filobasidiella	genus
genus_Picea	Picea	genus
genus_Thermoactinomyces	Thermoactinomyces	genus
genus_Wallemia	Wallemia	genus
genus_Ophiognomonia	Ophiognomonia	genus
genus_Pleurotus	Pleurotus	genus
genus_Psychrobacter	Psychrobacter	genus
genus_Hymenobacter	Hymenobacter	genus
genus_Byssochlamys	Byssochlamys	genus
genus_Peniophora	Peniophora	genus
genus_Cryptococcus	Cryptococcus	genus
genus_Puccinia	Puccinia	genus
genus_Lentinula	Lentinula	genus
genus_Condylostylus	Condylostylus	genus
genus_Pseudotsuga	Pseudotsuga	genus
genus_Postia	Postia	genus
genus_Haemophilus	Haemophilus	genus
genus_Pedobacter	Pedobacter	genus
genus_Zymoseptoria	Zymoseptoria	genus
genus_Oidiodendron	Oidiodendron	genus
genus_Gelatoporia	Gelatoporia	genus
genus_Piloderma	Piloderma	genus
genus_Gymnopus	Gymnopus	genus
genus_Dioszegia	Dioszegia	genus
genus_Aegilops	Aegilops	genus
genus_Salmonella	Salmonella	genus
genus_Aedes	Aedes	genus
genus_Adineta	Adineta	genus
genus_Phellinus	Phellinus	genus
genus_Histophilus	Histophilus	genus
genus_Necator	Necator	genus
genus_Chrysoporthe	Chrysoporthe	genus
genus_Hordeum	Hordeum	genus
genus_Marchantia	Marchantia	genus
genus_Liriomyza	Liriomyza	genus
genus_Chryseobacterium	Chryseobacterium	genus
genus_Daucus	Daucus	genus
genus_Actinomyces	Actinomyces	genus
genus_Raoultella	Raoultella	genus
genus_Heterobasidion	Heterobasidion	genus
genus_Lysinibacillus	Lysinibacillus	genus
genus_Lucilia	Lucilia	genus
genus_Segetibacter	Segetibacter	genus
genus_Oribacterium	Oribacterium	genus
genus_Pyrenochaeta	Pyrenochaeta	genus
genus_Fomitiporia	Fomitiporia	genus
genus_Leucoagaricus	Leucoagaricus	genus
genus_Zea	Zea	genus
genus_Exiguobacterium	Exiguobacterium	genus
genus_Sanghuangporus	Sanghuangporus	genus
genus_Triops	Triops	genus
genus_Curvularia	Curvularia	genus
genus_Enterococcus	Enterococcus	genus
genus_Glarea	Glarea	genus
genus_Castanea	Castanea	genus
genus_Juglans	Juglans	genus
genus_Paracoccus	Paracoccus	genus
genus_Klebsiella	Klebsiella	genus
genus_Prevotella	Prevotella	genus
genus_Candida	Candida	genus
genus_Plicaturopsis	Plicaturopsis	genus
genus_Amorphotheca	Amorphotheca	genus
genus_Exophiala	Exophiala	genus
genus_Lactococcus	Lactococcus	genus
genus_Paraphaeosphaeria	Paraphaeosphaeria	genus
genus_Nostoc	Nostoc	genus
genus_Botryobasidium	Botryobasidium	genus
genus_Schizophyllum	Schizophyllum	genus
genus_Micrococcus	Micrococcus	genus
genus_Clostridium	Clostridium	genus
genus_Hymenoscyphus	Hymenoscyphus	genus
genus_Microcystis	Microcystis	genus
genus_Phoma	Phoma	genus
genus_Beauveria	Beauveria	genus
genus_Lecanosticta	Lecanosticta	genus
genus_Felis	Felis	genus
genus_Adhaeribacter	Adhaeribacter	genus
genus_Trichoderma	Trichoderma	genus
genus_Lentinus	Lentinus	genus
genus_Stagonosporopsis	Stagonosporopsis	genus
genus_Kocuria	Kocuria	genus
genus_Nelumbo	Nelumbo	genus
genus_Fomitopsis	Fomitopsis	genus
genus_Metaseiulus	Metaseiulus	genus
genus_Diaporthe	Diaporthe	genus
genus_Wickerhamomyces	Wickerhamomyces	genus
genus_Sesamum	Sesamum	genus
genus_Sphingomonas	Sphingomonas	genus
genus_Marssonina	Marssonina	genus
genus_Helminthosporium	Helminthosporium	genus
genus_Crepidotus	Crepidotus	genus
genus_Actinobaculum	Actinobaculum	genus
genus_Cyberlindnera	Cyberlindnera	genus
genus_Rhodotorula	Rhodotorula	genus
genus_Rhagoletis	Rhagoletis	genus
genus_Paraphoma	Paraphoma	genus
genus_Dichomitus	Dichomitus	genus
genus_T4likevirus	T4likevirus	genus
genus_Themira	Themira	genus
genus_Beverwykella	Beverwykella	genus
genus_Geobacillus	Geobacillus	genus
genus_Sphyracephala	Sphyracephala	genus
genus_Morus	Morus	genus
genus_Agaricus	Agaricus	genus
genus_Laetiporus	Laetiporus	genus
genus_Enhydrobacter	Enhydrobacter	genus
genus_Cordyceps	Cordyceps	genus
genus_Anaerococcus	Anaerococcus	genus
genus_Burkholderia	Burkholderia	genus
genus_Rothia	Rothia	genus
genus_Grifola	Grifola	genus
genus_Hypsizygus	Hypsizygus	genus
genus_Achromobacter	Achromobacter	genus
genus_Hypholoma	Hypholoma	genus
genus_Eutreta	Eutreta	genus
genus_Lactobacillus	Lactobacillus	genus
genus_Rhizopus	Rhizopus	genus
genus_Erysipelatoclostridium	Erysipelatoclostridium	genus
genus_Tricholoma	Tricholoma	genus
genus_Obba	Obba	genus
genus_Bulleromyces	Bulleromyces	genus
genus_Ochroconis	Ochroconis	genus
genus_Tulasnella	Tulasnella	genus
genus_Xeromyces	Xeromyces	genus
genus_Thelohanellus	Thelohanellus	genus
genus_Sarocladium	Sarocladium	genus
genus_Eutypa	Eutypa	genus
genus_Tuberibacillus	Tuberibacillus	genus
genus_Delftia	Delftia	genus
genus_Streptomyces	Streptomyces	genus
genus_Rosellinia	Rosellinia	genus
genus_Phlebotomus	Phlebotomus	genus
genus_Cylindrobasidium	Cylindrobasidium	genus
genus_Pontibacter	Pontibacter	genus
genus_Pediculus	Pediculus	genus
genus_Ananas	Ananas	genus
genus_Desulfotomaculum	Desulfotomaculum	genus
genus_Aerococcus	Aerococcus	genus
genus_Valsa	Valsa	genus
genus_Physcomitrella	Physcomitrella	genus
genus_Veillonella	Veillonella	genus
genus_Citrus	Citrus	genus
genus_Hypoxylon	Hypoxylon	genus
genus_Caligus	Caligus	genus
genus_Coelastrella	Coelastrella	genus
genus_Diaphorina	Diaphorina	genus
genus_Daedalea	Daedalea	genus
genus_Lignosus	Lignosus	genus
genus_Deinococcus	Deinococcus	genus
genus_Capronia	Capronia	genus
genus_Rhizoctonia	Rhizoctonia	genus
genus_Solanum	Solanum	genus
genus_Vitis	Vitis	genus
genus_Hortaea	Hortaea	genus
genus_Ascochyta	Ascochyta	genus
genus_Malus	Malus	genus
genus_Listeria	Listeria	genus
genus_Tilletia	Tilletia	genus
genus_Sediminibacterium	Sediminibacterium	genus
genus_Coniosporium	Coniosporium	genus
genus_Spirosoma	Spirosoma	genus
genus_Medicago	Medicago	genus
genus_Saccharomyces	Saccharomyces	genus
genus_Biatriospora	Biatriospora	genus
genus_Armillaria	Armillaria	genus
genus_Laurentiella	Laurentiella	genus
genus_Flammulina	Flammulina	genus
genus_Bacteroides	Bacteroides	genus
genus_Prunus	Prunus	genus
genus_Rasamsonia	Rasamsonia	genus
genus_Faecalibacterium	Faecalibacterium	genus
genus_Sclerotinia	Sclerotinia	genus
genus_Truepera	Truepera	genus
genus_Thielavia	Thielavia	genus
genus_Amborella	Amborella	genus
genus_Rutstroemia	Rutstroemia	genus
genus_Stemphylium	Stemphylium	genus
genus_Taiwanofungus	Taiwanofungus	genus
genus_Brachypodium	Brachypodium	genus
genus_Finegoldia	Finegoldia	genus
genus_Coprinopsis	Coprinopsis	genus
genus_Wolfiporia	Wolfiporia	genus
genus_Serendipita	Serendipita	genus
genus_Dactylellina	Dactylellina	genus
genus_Neisseria	Neisseria	genus
genus_Synechocystis	Synechocystis	genus
genus_Cannabis	Cannabis	genus
genus_Niastella	Niastella	genus
genus_Ephydra	Ephydra	genus
genus_Dermatophagoides	Dermatophagoides	genus
genus_Paecilomyces	Paecilomyces	genus
genus_Amanita	Amanita	genus
genus_Ganoderma	Ganoderma	genus
genus_Baudoinia	Baudoinia	genus
genus_Leucosporidium	Leucosporidium	genus
genus_Tolypothrix	Tolypothrix	genus
genus_Galerina	Galerina	genus
genus_Rosa	Rosa	genus
genus_Glycine	Glycine	genus
genus_Meira	Meira	genus
genus_Ricinus	Ricinus	genus
genus_Punctularia	Punctularia	genus
genus_Physarum	Physarum	genus
genus_Sporosarcina	Sporosarcina	genus
genus_Caldibacillus	Caldibacillus	genus
genus_Rhizomucor	Rhizomucor	genus
genus_Citrullus	Citrullus	genus
genus_Omphalotus	Omphalotus	genus
genus_Pyrus	Pyrus	genus
genus_Sphingobacterium	Sphingobacterium	genus
genus_Scytonema	Scytonema	genus
genus_Pantoea	Pantoea	genus
genus_Mucilaginibacter	Mucilaginibacter	genus
genus_Hydnomerulius	Hydnomerulius	genus
genus_Cladonia	Cladonia	genus
genus_Madurella	Madurella	genus
genus_Actinidia	Actinidia	genus
genus_Hibiscus	Hibiscus	genus
genus_Brochothrix	Brochothrix	genus
genus_Pseudocercospora	Pseudocercospora	genus
genus_Phoenix	Phoenix	genus
genus_Ureibacillus	Ureibacillus	genus
genus_Dolosigranulum	Dolosigranulum	genus
genus_Passalora	Passalora	genus
genus_Gallus	Gallus	genus
genus_Paraurostyla	Paraurostyla	genus
genus_Venturia	Venturia	genus
genus_Lactuca	Lactuca	genus
genus_Debaryomyces	Debaryomyces	genus
genus_Lasioglossum	Lasioglossum	genus
genus_Arabis	Arabis	genus
genus_Stagonospora	Stagonospora	genus
genus_Mycosphaerella	Mycosphaerella	genus
genus_Frankliniella	Frankliniella	genus
genus_Gardnerella	Gardnerella	genus
genus_Treponema	Treponema	genus
genus_Tuber	Tuber	genus
genus_Ancylostoma	Ancylostoma	genus
genus_Ceraceosorus	Ceraceosorus	genus
genus_Chaoborus	Chaoborus	genus
genus_Cystobasidium	Cystobasidium	genus
genus_Uroleptopsis	Uroleptopsis	genus
genus_Ascocoryne	Ascocoryne	genus
genus_Oryza	Oryza	genus
genus_Acremonium	Acremonium	genus
genus_Claviceps	Claviceps	genus
genus_Dyadobacter	Dyadobacter	genus
genus_Flavihumibacter	Flavihumibacter	genus
genus_Fibroporia	Fibroporia	genus
genus_Laccaria	Laccaria	genus
genus_Populus	Populus	genus
genus_Erythrobasidium	Erythrobasidium	genus
genus_Roseomonas	Roseomonas	genus
genus_Gossypium	Gossypium	genus
genus_Pseudoalteromonas	Pseudoalteromonas	genus
genus_Flavobacterium	Flavobacterium	genus
genus_Calycina	Calycina	genus
genus_Mentha	Mentha	genus
genus_Yersinia	Yersinia	genus
genus_Aliterella	Aliterella	genus
genus_Paramecium	Paramecium	genus
genus_Alloprevotella	Alloprevotella	genus
genus_Stenotrophomonas	Stenotrophomonas	genus
genus_Pyrenophora	Pyrenophora	genus
genus_Rhinocladiella	Rhinocladiella	genus
genus_Terrimonas	Terrimonas	genus
genus_Hebeloma	Hebeloma	genus
genus_Sporothrix	Sporothrix	genus
genus_Absidia	Absidia	genus
genus_Geotrichum	Geotrichum	genus
genus_ssDNA viruses	ssDNA viruses	genus
genus_Pisolithus	Pisolithus	genus
genus_Oceanobacillus	Oceanobacillus	genus
genus_Purpureocillium	Purpureocillium	genus
genus_Moniliophthora	Moniliophthora	genus
genus_Colletotrichum	Colletotrichum	genus
genus_Gloeophyllum	Gloeophyllum	genus
genus_Alkaliphilus	Alkaliphilus	genus
genus_Pestalotiopsis	Pestalotiopsis	genus
genus_Vigna	Vigna	genus
genus_Mastigocladopsis	Mastigocladopsis	genus
genus_Bipolaris	Bipolaris	genus
genus_Filobasidium	Filobasidium	genus
genus_Planomicrobium	Planomicrobium	genus
genus_Exidia	Exidia	genus
genus_Hassallia	Hassallia	genus
genus_Apis	Apis	genus
genus_Fragaria	Fragaria	genus
genus_Clavaria	Clavaria	genus
genus_Fischerella	Fischerella	genus
genus_Corynespora	Corynespora	genus
genus_Shiraia	Shiraia	genus
genus_Cryomyces	Cryomyces	genus
genus_Mesorhizobium	Mesorhizobium	genus
genus_Microcoleus	Microcoleus	genus
genus_Vaccinium	Vaccinium	genus
genus_Jaapia	Jaapia	genus
genus_Prasinovirus	Prasinovirus	genus
genus_Pediococcus	Pediococcus	genus
genus_Kingella	Kingella	genus
genus_Cenococcum	Cenococcum	genus
genus_Chaetomium	Chaetomium	genus
genus_Epichloe	Epichloe	genus
genus_Mrakia	Mrakia	genus
genus_Cladophialophora	Cladophialophora	genus
genus_Microdochium	Microdochium	genus
genus_Aeromonas	Aeromonas	genus
genus_Pseudonocardia	Pseudonocardia	genus
genus_Brugia	Brugia	genus
genus_Desmospora	Desmospora	genus
genus_Leptosphaeria	Leptosphaeria	genus
genus_Coniophora	Coniophora	genus
genus_Sphingobium	Sphingobium	genus
genus_Niabella	Niabella	genus
genus_Leclercia	Leclercia	genus
genus_Planococcus	Planococcus	genus
genus_Parastagonospora	Parastagonospora	genus
genus_Leptolyngbya	Leptolyngbya	genus
genus_Turicibacter	Turicibacter	genus
genus_Phaeoacremonium	Phaeoacremonium	genus
genus_Salmo	Salmo	genus
genus_Mycena	Mycena	genus
genus_Legionella	Legionella	genus
genus_Salinicoccus	Salinicoccus	genus
genus_Aptenodytes	Aptenodytes	genus
genus_Viridibacillus	Viridibacillus	genus
genus_Cucumis	Cucumis	genus
genus_Chenopodium	Chenopodium	genus
genus_Emmonsia	Emmonsia	genus
genus_Sphaerulina	Sphaerulina	genus
genus_Tolypocladium	Tolypocladium	genus
genus_Janthinobacterium	Janthinobacterium	genus
genus_Eubacterium	Eubacterium	genus
genus_Sphaerobolus	Sphaerobolus	genus
genus_Meyerozyma	Meyerozyma	genus
genus_Setaria	Setaria	genus
genus_Azadirachta	Azadirachta	genus
genus_Marinococcus	Marinococcus	genus
genus_Calothrix	Calothrix	genus
genus_Roseburia	Roseburia	genus
genus_Neolentinus	Neolentinus	genus
genus_Dendroctonus	Dendroctonus	genus
genus_Wuchereria	Wuchereria	genus
genus_Eimeria	Eimeria	genus
genus_Brassica	Brassica	genus
genus_Xylaria	Xylaria	genus
genus_Tumebacillus	Tumebacillus	genus
genus_Gloeocapsa	Gloeocapsa	genus
genus_Shimazuella	Shimazuella	genus
genus_Elaeis	Elaeis	genus
genus_Volvariella	Volvariella	genus
genus_Carnobacterium	Carnobacterium	genus
genus_Sporisorium	Sporisorium	genus
genus_Umbilicaria	Umbilicaria	genus
genus_Massilia	Massilia	genus
genus_Erysiphe	Erysiphe	genus
genus_Acyrthosiphon	Acyrthosiphon	genus
genus_Meiothermus	Meiothermus	genus
genus_Basipetospora	Basipetospora	genus
genus_Nicotiana	Nicotiana	genus
genus_Belnapia	Belnapia	genus
genus_Metarhizium	Metarhizium	genus
genus_Hysterium	Hysterium	genus
genus_Catonella	Catonella	genus
genus_Gongronella	Gongronella	genus
genus_Loktanella	Loktanella	genus
genus_Arthroderma	Arthroderma	genus
genus_Macrocystidia	Macrocystidia	genus
genus_Klebsormidium	Klebsormidium	genus
genus_Serpula	Serpula	genus
genus_Linepithema	Linepithema	genus
genus_Enterobacter	Enterobacter	genus
genus_Gemella	Gemella	genus
genus_Isaria	Isaria	genus
genus_Lepidopterella	Lepidopterella	genus
genus_Chlamydia	Chlamydia	genus
genus_Orbilia	Orbilia	genus
genus_Calocera	Calocera	genus
genus_Ruminiclostridium	Ruminiclostridium	genus
genus_Termitomyces	Termitomyces	genus
genus_Jeotgalicoccus	Jeotgalicoccus	genus
genus_Daldinia	Daldinia	genus
genus_Moraxella	Moraxella	genus
genus_Peptoclostridium	Peptoclostridium	genus
genus_Taphrina	Taphrina	genus
genus_Phaeomoniella	Phaeomoniella	genus
genus_Rufibacter	Rufibacter	genus
genus_Weeksella	Weeksella	genus
genus_Gliomastix	Gliomastix	genus
genus_Verruconis	Verruconis	genus
genus_Dichanthelium	Dichanthelium	genus
genus_Beta	Beta	genus
genus_Spinacia	Spinacia	genus
genus_Capnocytophaga	Capnocytophaga	genus
genus_Zizania	Zizania	genus
genus_Crinalium	Crinalium	genus
genus_Acanthamoeba	Acanthamoeba	genus
genus_Neofusicoccum	Neofusicoccum	genus
genus_Auricularia	Auricularia	genus
genus_Coraliomargarita	Coraliomargarita	genus
genus_Gyalolechia	Gyalolechia	genus
genus_Arthrobacter	Arthrobacter	genus
genus_Candidatus Cardinium	Candidatus Cardinium	genus
genus_Porphyromonas	Porphyromonas	genus
genus_Aggregatibacter	Aggregatibacter	genus
genus_Trifolium	Trifolium	genus
genus_Eucalyptus	Eucalyptus	genus
genus_Tarenaya	Tarenaya	genus
genus_Cryptosporidium	Cryptosporidium	genus
genus_Trebouxia	Trebouxia	genus
genus_Fonsecaea	Fonsecaea	genus
genus_Vibrio	Vibrio	genus
genus_Ictidomys	Ictidomys	genus
genus_Methanobacterium	Methanobacterium	genus
genus_Acidomyces	Acidomyces	genus
genus_Desulfocarbo	Desulfocarbo	genus
genus_Hirschia	Hirschia	genus
genus_Acetivibrio	Acetivibrio	genus
genus_Drosophila	Drosophila	genus
genus_Cercospora	Cercospora	genus
genus_Shigella	Shigella	genus
genus_Pneumocystis	Pneumocystis	genus
genus_Salinimicrobium	Salinimicrobium	genus
genus_Domibacillus	Domibacillus	genus
genus_Methanosarcina	Methanosarcina	genus
genus_Stylonychia	Stylonychia	genus
genus_Leuconostoc	Leuconostoc	genus
genus_Gillisia	Gillisia	genus
genus_Chroococcidiopsis	Chroococcidiopsis	genus
genus_Halobacillus	Halobacillus	genus
genus_Piriformospora	Piriformospora	genus
genus_Epilithonimonas	Epilithonimonas	genus
genus_Peptoniphilus	Peptoniphilus	genus
genus_Trichosporon	Trichosporon	genus
genus_Devosia	Devosia	genus
genus_Uromyces	Uromyces	genus
genus_Abiotrophia	Abiotrophia	genus
genus_Moesziomyces	Moesziomyces	genus
genus_Pleurocapsa	Pleurocapsa	genus
genus_Coccomyxa	Coccomyxa	genus
genus_Kwoniella	Kwoniella	genus
genus_Oscillatoria	Oscillatoria	genus
genus_Mogibacterium	Mogibacterium	genus
genus_Novosphingobium	Novosphingobium	genus
genus_Ruminococcus	Ruminococcus	genus
genus_Thermoascus	Thermoascus	genus
genus_Heliconius	Heliconius	genus
genus_Meleagris	Meleagris	genus
genus_Rickettsiella	Rickettsiella	genus
genus_Torrubiella	Torrubiella	genus
genus_Verticillium	Verticillium	genus
genus_Gracilibacillus	Gracilibacillus	genus
genus_Thermomyces	Thermomyces	genus
genus_Janibacter	Janibacter	genus
genus_Rhodococcus	Rhodococcus	genus
genus_Cyphellophora	Cyphellophora	genus
genus_Didymobotryum	Didymobotryum	genus
genus_Symbiotaphrina	Symbiotaphrina	genus
genus_Oropetium	Oropetium	genus
genus_Diplodia	Diplodia	genus
genus_Anoxybacillus	Anoxybacillus	genus
genus_Shewanella	Shewanella	genus
genus_Alphabaculovirus	Alphabaculovirus	genus
genus_Blautia	Blautia	genus
genus_Paucisalibacillus	Paucisalibacillus	genus
genus_Skermanella	Skermanella	genus
genus_Macrostomum	Macrostomum	genus
genus_Methylobacterium	Methylobacterium	genus
genus_Plutella	Plutella	genus
genus_Alicyclobacillus	Alicyclobacillus	genus
genus_Halomonas	Halomonas	genus
genus_Eucidaris	Eucidaris	genus
genus_Desulfosporosinus	Desulfosporosinus	genus
genus_Stachybotrys	Stachybotrys	genus
genus_Alkanindiges	Alkanindiges	genus
genus_Phialophora	Phialophora	genus
genus_Paxillus	Paxillus	genus
genus_Serratia	Serratia	genus
genus_Anopheles	Anopheles	genus
genus_Peptostreptococcus	Peptostreptococcus	genus
genus_Endocarpon	Endocarpon	genus
genus_Modestobacter	Modestobacter	genus
genus_Theobroma	Theobroma	genus
genus_Granulicatella	Granulicatella	genus
genus_Ensete	Ensete	genus
genus_Dothistroma	Dothistroma	genus
genus_Lymnaea	Lymnaea	genus
genus_Syntrophomonas	Syntrophomonas	genus
genus_Brevibacillus	Brevibacillus	genus
genus_Mastigocladus	Mastigocladus	genus
genus_Ornithinibacillus	Ornithinibacillus	genus
genus_Onygena	Onygena	genus
genus_Primula	Primula	genus
genus_Arcticibacter	Arcticibacter	genus
genus_Bradyrhizobium	Bradyrhizobium	genus
genus_Cajanus	Cajanus	genus
genus_Eristalis	Eristalis	genus
genus_Glonium	Glonium	genus
genus_Hanseniaspora	Hanseniaspora	genus
genus_Glutamicibacter	Glutamicibacter	genus
genus_Hevea	Hevea	genus
genus_Paracoccidioides	Paracoccidioides	genus
genus_Nocardiopsis	Nocardiopsis	genus
genus_Athelia	Athelia	genus
genus_Arcobacter	Arcobacter	genus
genus_Ziziphus	Ziziphus	genus
genus_Cellvibrio	Cellvibrio	genus
genus_Suillus	Suillus	genus
genus_Pseudoglutamicibacter	Pseudoglutamicibacter	genus
genus_Pyrinomonas	Pyrinomonas	genus
genus_Methylophilus	Methylophilus	genus
genus_Sporomusa	Sporomusa	genus
genus_Ktedonobacter	Ktedonobacter	genus
genus_Hypochthonius	Hypochthonius	genus
genus_Scedosporium	Scedosporium	genus
genus_Ixodes	Ixodes	genus
genus_Virgibacillus	Virgibacillus	genus
genus_Ciborinia	Ciborinia	genus
genus_Lasallia	Lasallia	genus
genus_Anthracocystis	Anthracocystis	genus
genus_Lodderomyces	Lodderomyces	genus
genus_Podospora	Podospora	genus
genus_Phi29likevirus	Phi29likevirus	genus
genus_Dactylonectria	Dactylonectria	genus
genus_Botryosphaeria	Botryosphaeria	genus
genus_Pelotomaculum	Pelotomaculum	genus
genus_Arachis	Arachis	genus
genus_Pochonia	Pochonia	genus
genus_Graphilbum	Graphilbum	genus
genus_Achipteria	Achipteria	genus
genus_Rubritalea	Rubritalea	genus
genus_Lachnoanaerobaculum	Lachnoanaerobaculum	genus
genus_Chitinophaga	Chitinophaga	genus
genus_Dialister	Dialister	genus
genus_Tilletiaria	Tilletiaria	genus
genus_Desulfitibacter	Desulfitibacter	genus
genus_Silybum	Silybum	genus
genus_Myceliophthora	Myceliophthora	genus
genus_Dorea	Dorea	genus
genus_Caldilinea	Caldilinea	genus
genus_Sterkiella	Sterkiella	genus
genus_Trachymyrmex	Trachymyrmex	genus
genus_Haematobacter	Haematobacter	genus
genus_Vicia	Vicia	genus
genus_Leptoxyphium	Leptoxyphium	genus
genus_Leptotrichia	Leptotrichia	genus
genus_Cohnella	Cohnella	genus
genus_Pedosphaera	Pedosphaera	genus
genus_Tremella	Tremella	genus
genus_Reticulascus	Reticulascus	genus
genus_Mucor	Mucor	genus
genus_Aneurinibacillus	Aneurinibacillus	genus
genus_Myroides	Myroides	genus
genus_Fagopyrum	Fagopyrum	genus
genus_Weissella	Weissella	genus
genus_Teleopsis	Teleopsis	genus
genus_Ophiostoma	Ophiostoma	genus
genus_Noviherbaspirillum	Noviherbaspirillum	genus
genus_Comamonas	Comamonas	genus
genus_Amphibacillus	Amphibacillus	genus
genus_Runella	Runella	genus
genus_Bdellovibrio	Bdellovibrio	genus
genus_Neonectria	Neonectria	genus
genus_Operophtera	Operophtera	genus
genus_Methylotenera	Methylotenera	genus
genus_Rheinheimera	Rheinheimera	genus
genus_Kamptonema	Kamptonema	genus
genus_Fistulina	Fistulina	genus
genus_Lacinutrix	Lacinutrix	genus
genus_Candidatus Solibacter	Candidatus Solibacter	genus
genus_Blattella	Blattella	genus
genus_Macrococcus	Macrococcus	genus
genus_Cystobasidiopsis	Cystobasidiopsis	genus
genus_Pasteurella	Pasteurella	genus
genus_Conchiformibius	Conchiformibius	genus
genus_Cyclobacterium	Cyclobacterium	genus
genus_Scleroderma	Scleroderma	genus
genus_Phyllosticta	Phyllosticta	genus
genus_Sporocytophaga	Sporocytophaga	genus
genus_Algoriphagus	Algoriphagus	genus
genus_Acidovorax	Acidovorax	genus
genus_Diuraphis	Diuraphis	genus
genus_Halococcus	Halococcus	genus
genus_Thermomucor	Thermomucor	genus
genus_Phalaenopsis	Phalaenopsis	genus
genus_Plasmodium	Plasmodium	genus
genus_Caldalkalibacillus	Caldalkalibacillus	genus
genus_Lautropia	Lautropia	genus
genus_Magnaporthe	Magnaporthe	genus
genus_Nematostella	Nematostella	genus
genus_Blumeria	Blumeria	genus
genus_Synechococcus	Synechococcus	genus
genus_Myxosarcina	Myxosarcina	genus
genus_Alloiococcus	Alloiococcus	genus
genus_Coleofasciculus	Coleofasciculus	genus
genus_Butyrivibrio	Butyrivibrio	genus
genus_Varibaculum	Varibaculum	genus
genus_Phlebopus	Phlebopus	genus
genus_Xylona	Xylona	genus
genus_Rhizobium	Rhizobium	genus
genus_Pelosinus	Pelosinus	genus
genus_Conyza	Conyza	genus
genus_Tetranychus	Tetranychus	genus
genus_Fusobacterium	Fusobacterium	genus
genus_Microvirga	Microvirga	genus
genus_Falciphora	Falciphora	genus
genus_Schistosoma	Schistosoma	genus
genus_Bergeyella	Bergeyella	genus
genus_Gottschalkia	Gottschalkia	genus
genus_Erwinia	Erwinia	genus
genus_Syncephalastrum	Syncephalastrum	genus
genus_Frankia	Frankia	genus
genus_Priapulus	Priapulus	genus
genus_Genlisea	Genlisea	genus
genus_Methylophaga	Methylophaga	genus
genus_Risungbinella	Risungbinella	genus
genus_Alkalibacterium	Alkalibacterium	genus
genus_Peltaster	Peltaster	genus
genus_Haemonchus	Haemonchus	genus
genus_Rhytidhysteron	Rhytidhysteron	genus
genus_Steganacarus	Steganacarus	genus
genus_Winogradskyella	Winogradskyella	genus
genus_Solibacillus	Solibacillus	genus
genus_Leptographium	Leptographium	genus
genus_Amauroascus	Amauroascus	genus
genus_Cronobacter	Cronobacter	genus
genus_Setosphaeria	Setosphaeria	genus
genus_Platynothrus	Platynothrus	genus
genus_Kalmanozyma	Kalmanozyma	genus
genus_Macrophomina	Macrophomina	genus
genus_Clonostachys	Clonostachys	genus
genus_Orchesella	Orchesella	genus
genus_Marinomonas	Marinomonas	genus
genus_Culex	Culex	genus
genus_Fibrisoma	Fibrisoma	genus
genus_Anaerovorax	Anaerovorax	genus
genus_Cimex	Cimex	genus
genus_Austrofundulus	Austrofundulus	genus
genus_Agrobacterium	Agrobacterium	genus
genus_Coccidioides	Coccidioides	genus
genus_Gilvimarinus	Gilvimarinus	genus
genus_Thermosinus	Thermosinus	genus
genus_Rubellimicrobium	Rubellimicrobium	genus
genus_Cladosiphon	Cladosiphon	genus
genus_Columba	Columba	genus
genus_Flexithrix	Flexithrix	genus
genus_Herbaspirillum	Herbaspirillum	genus
genus_Haloferula	Haloferula	genus
genus_Campylobacter	Campylobacter	genus
genus_Drechslerella	Drechslerella	genus
genus_Brevibacterium	Brevibacterium	genus
genus_Rubrobacter	Rubrobacter	genus
genus_Neosynechococcus	Neosynechococcus	genus
genus_Paenisporosarcina	Paenisporosarcina	genus
genus_Endocalyx	Endocalyx	genus
genus_Leucobacter	Leucobacter	genus
genus_Fibrella	Fibrella	genus
genus_Cyanothece	Cyanothece	genus
genus_Xanthomonas	Xanthomonas	genus
genus_Dietzia	Dietzia	genus
genus_Leptospira	Leptospira	genus
genus_Ophiocordyceps	Ophiocordyceps	genus
genus_Fluviicola	Fluviicola	genus
genus_Mus	Mus	genus
genus_Ipomoea	Ipomoea	genus
genus_Haliscomenobacter	Haliscomenobacter	genus
genus_Zoysia	Zoysia	genus
genus_Anabaena	Anabaena	genus
genus_Methanobrevibacter	Methanobrevibacter	genus
genus_Hirsutella	Hirsutella	genus
genus_Lasius	Lasius	genus
genus_Cyphomyrmex	Cyphomyrmex	genus
genus_Desulfitobacterium	Desulfitobacterium	genus
genus_Dermabacter	Dermabacter	genus
genus_Chlorogloeopsis	Chlorogloeopsis	genus
genus_Nodularia	Nodularia	genus
genus_Danio	Danio	genus
genus_Moorella	Moorella	genus
genus_Pseudozyma	Pseudozyma	genus
genus_Rhodopirellula	Rhodopirellula	genus
genus_Methylobacter	Methylobacter	genus
genus_Sphingopyxis	Sphingopyxis	genus
genus_Microbacterium	Microbacterium	genus
genus_Johnsonella	Johnsonella	genus
genus_Nitrosopumilus	Nitrosopumilus	genus
genus_Cicer	Cicer	genus
genus_Planktomarina	Planktomarina	genus
genus_Cesiribacter	Cesiribacter	genus
genus_Joostella	Joostella	genus
genus_Acaryochloris	Acaryochloris	genus
genus_Cylindrospermum	Cylindrospermum	genus
genus_Facklamia	Facklamia	genus
genus_Leishmania	Leishmania	genus
genus_Tetragenococcus	Tetragenococcus	genus
genus_Eragrostis	Eragrostis	genus
genus_Pseudobacteroides	Pseudobacteroides	genus
genus_Torulaspora	Torulaspora	genus
genus_Geobacter	Geobacter	genus
genus_Elizabethkingia	Elizabethkingia	genus
genus_Terrisporobacter	Terrisporobacter	genus
genus_Penstemon	Penstemon	genus
genus_Picochlorum	Picochlorum	genus
genus_Psychromonas	Psychromonas	genus
genus_Azospirillum	Azospirillum	genus
genus_Astrammina	Astrammina	genus
genus_Actinoplanes	Actinoplanes	genus
genus_Pleurobrachia	Pleurobrachia	genus
genus_Nocardioides	Nocardioides	genus
genus_Dongia	Dongia	genus
genus_Chamaesiphon	Chamaesiphon	genus
genus_Empedobacter	Empedobacter	genus
genus_Dendrobium	Dendrobium	genus
genus_Camelina	Camelina	genus
genus_Williamsia	Williamsia	genus
genus_Pseudanabaena	Pseudanabaena	genus
genus_Gekko	Gekko	genus
genus_Eurytemora	Eurytemora	genus
genus_Lupinus	Lupinus	genus
genus_Microlunatus	Microlunatus	genus
genus_Holtermanniella	Holtermanniella	genus
genus_Blastomyces	Blastomyces	genus
genus_Spirillospora	Spirillospora	genus
genus_Chthoniobacter	Chthoniobacter	genus
genus_Duganella	Duganella	genus
genus_Sunxiuqinia	Sunxiuqinia	genus
genus_Draconibacterium	Draconibacterium	genus
genus_Nosocomiicoccus	Nosocomiicoccus	genus
genus_Bartonella	Bartonella	genus
genus_Chrysosporium	Chrysosporium	genus
genus_Moorea	Moorea	genus
genus_Aquilaria	Aquilaria	genus
genus_Trichophyton	Trichophyton	genus
genus_Candidatus Pelagibacter	Candidatus Pelagibacter	genus
genus_Ochrobactrum	Ochrobactrum	genus
genus_Basidioascus	Basidioascus	genus
genus_Olivibacter	Olivibacter	genus
genus_Agrilus	Agrilus	genus
genus_Collinsella	Collinsella	genus
genus_Coprococcus	Coprococcus	genus
genus_Herbinix	Herbinix	genus
genus_Saccharopolyspora	Saccharopolyspora	genus
genus_Eudoraea	Eudoraea	genus
genus_Catajapyx	Catajapyx	genus
genus_Albophoma	Albophoma	genus
genus_Oxytricha	Oxytricha	genus
genus_Cytophaga	Cytophaga	genus
genus_Kurthia	Kurthia	genus
genus_Salegentibacter	Salegentibacter	genus
genus_Solitalea	Solitalea	genus
genus_Belgica	Belgica	genus
genus_Cellulomonas	Cellulomonas	genus
genus_Knoellia	Knoellia	genus
genus_Polynucleobacter	Polynucleobacter	genus
genus_Oxobacter	Oxobacter	genus
genus_Psychroserpens	Psychroserpens	genus
genus_Lachnoclostridium	Lachnoclostridium	genus
genus_Yarrowia	Yarrowia	genus
genus_Selenomonas	Selenomonas	genus
genus_Calditerricola	Calditerricola	genus
genus_Altererythrobacter	Altererythrobacter	genus
genus_Rahnella	Rahnella	genus
genus_Polaribacter	Polaribacter	genus
genus_Hyaloperonospora	Hyaloperonospora	genus
genus_Sharpea	Sharpea	genus
genus_Limulus	Limulus	genus
genus_Candidatus Amoebophilus	Candidatus Amoebophilus	genus
genus_Gaeumannomyces	Gaeumannomyces	genus
genus_Ocimum	Ocimum	genus
genus_Lotus	Lotus	genus
genus_Nitrosomonas	Nitrosomonas	genus
genus_Verrucomicrobium	Verrucomicrobium	genus
genus_Dorcoceras	Dorcoceras	genus
genus_Tenacibaculum	Tenacibaculum	genus
genus_Paludibacter	Paludibacter	genus
genus_Nodosilinea	Nodosilinea	genus
genus_Betabaculovirus	Betabaculovirus	genus
genus_Silene	Silene	genus
genus_Maribacter	Maribacter	genus
genus_Atkinsonella	Atkinsonella	genus
genus_Nafulsella	Nafulsella	genus
genus_Byssoonygena	Byssoonygena	genus
genus_Aureimonas	Aureimonas	genus
genus_Anaerobacillus	Anaerobacillus	genus
genus_Urostyla	Urostyla	genus
genus_Helcococcus	Helcococcus	genus
genus_Mayetiola	Mayetiola	genus
genus_Megasphaera	Megasphaera	genus
genus_Hoeflea	Hoeflea	genus
genus_Trichogramma	Trichogramma	genus
genus_Parabacteroides	Parabacteroides	genus
genus_Dianthus	Dianthus	genus
genus_Lyngbya	Lyngbya	genus
genus_Thalassobacillus	Thalassobacillus	genus
genus_Dysgonomonas	Dysgonomonas	genus
genus_Spizellomyces	Spizellomyces	genus
genus_Nicrophorus	Nicrophorus	genus
genus_Calonectria	Calonectria	genus
genus_Granulicella	Granulicella	genus
genus_Oscillibacter	Oscillibacter	genus
genus_Octopus	Octopus	genus
genus_Terribacillus	Terribacillus	genus
genus_Rudanella	Rudanella	genus
genus_Clavispora	Clavispora	genus
genus_Plasmodiophora	Plasmodiophora	genus
genus_Caulobacter	Caulobacter	genus
genus_Jiangella	Jiangella	genus
genus_Clogmia	Clogmia	genus
genus_Holdemanella	Holdemanella	genus
genus_Lacticigenium	Lacticigenium	genus
genus_Stegodyphus	Stegodyphus	genus
genus_Eremococcus	Eremococcus	genus
genus_Proteiniphilum	Proteiniphilum	genus
genus_Geodermatophilus	Geodermatophilus	genus
genus_Branchiostoma	Branchiostoma	genus
genus_Gregarina	Gregarina	genus
genus_Candidatus Koribacter	Candidatus Koribacter	genus
genus_Melitaea	Melitaea	genus
genus_Erythranthe	Erythranthe	genus
genus_Sorghum	Sorghum	genus
genus_Rouxiella	Rouxiella	genus
genus_Fervidicella	Fervidicella	genus
genus_Muricauda	Muricauda	genus
genus_Caldicoprobacter	Caldicoprobacter	genus
genus_Mortierella	Mortierella	genus
genus_Brevundimonas	Brevundimonas	genus
genus_Carthamus	Carthamus	genus
genus_Alloascoidea	Alloascoidea	genus
genus_Clupea	Clupea	genus
genus_Tetmemena	Tetmemena	genus
genus_Eichhornia	Eichhornia	genus
genus_Thermobacillus	Thermobacillus	genus
genus_Biomphalaria	Biomphalaria	genus
genus_Alkalibacillus	Alkalibacillus	genus
genus_Arenitalea	Arenitalea	genus
genus_Formosa	Formosa	genus
genus_Catharanthus	Catharanthus	genus
genus_Opitutus	Opitutus	genus
genus_Parascaris	Parascaris	genus
genus_Photobacterium	Photobacterium	genus
genus_Histoplasma	Histoplasma	genus
genus_Centruroides	Centruroides	genus
genus_Manihot	Manihot	genus
genus_Riemerella	Riemerella	genus
genus_Owenweeksia	Owenweeksia	genus
genus_Simonsiella	Simonsiella	genus
genus_Thiothrix	Thiothrix	genus
genus_Haloplasma	Haloplasma	genus
genus_Pontibacillus	Pontibacillus	genus
genus_Roseivirga	Roseivirga	genus
genus_Pseudopodoces	Pseudopodoces	genus
genus_Chironomus	Chironomus	genus
genus_Micavibrio	Micavibrio	genus
genus_Knoxdaviesia	Knoxdaviesia	genus
genus_Nilaparvata	Nilaparvata	genus
genus_Blattabacterium	Blattabacterium	genus
genus_Pseudarthrobacter	Pseudarthrobacter	genus
genus_Globodera	Globodera	genus
genus_Skunalikevirus	Skunalikevirus	genus
genus_Cetobacterium	Cetobacterium	genus
genus_Cavia	Cavia	genus
genus_Roseiflexus	Roseiflexus	genus
genus_Pseudoperonospora	Pseudoperonospora	genus
genus_Polaromonas	Polaromonas	genus
genus_Tepidanaerobacter	Tepidanaerobacter	genus
genus_Parasitella	Parasitella	genus
genus_Thermogemmatispora	Thermogemmatispora	genus
genus_Herpetosiphon	Herpetosiphon	genus
genus_Thielaviopsis	Thielaviopsis	genus
genus_Nasonia	Nasonia	genus
genus_Kytococcus	Kytococcus	genus
genus_Atopococcus	Atopococcus	genus
genus_Echinicola	Echinicola	genus
genus_Arabidopsis	Arabidopsis	genus
genus_Mesobuthus	Mesobuthus	genus
genus_Anoplophora	Anoplophora	genus
genus_Citrobacter	Citrobacter	genus
genus_Cunninghamella	Cunninghamella	genus
genus_Candidatus Paracaedibacter	Candidatus Paracaedibacter	genus
genus_Solobacterium	Solobacterium	genus
genus_Aethionema	Aethionema	genus
genus_Umbelopsis	Umbelopsis	genus
genus_Emticicia	Emticicia	genus
genus_Takifugu	Takifugu	genus
genus_Calycopis	Calycopis	genus
genus_Hungatella	Hungatella	genus
genus_Raffaelea	Raffaelea	genus
genus_Fulvivirga	Fulvivirga	genus
genus_Hellea	Hellea	genus
genus_Protopolystoma	Protopolystoma	genus
genus_Hypocrella	Hypocrella	genus
genus_Nosema	Nosema	genus
genus_Phaseolus	Phaseolus	genus
genus_Thalassiosira	Thalassiosira	genus
genus_Candidatus Nitrosoarchaeum	Candidatus Nitrosoarchaeum	genus
genus_Dokdonia	Dokdonia	genus
genus_Thermobaculum	Thermobaculum	genus
genus_Bryobacter	Bryobacter	genus
genus_Maylandia	Maylandia	genus
genus_Dictyostelium	Dictyostelium	genus
genus_Robinsoniella	Robinsoniella	genus
genus_Nannochloropsis	Nannochloropsis	genus
genus_Balansia	Balansia	genus
genus_Cellulophaga	Cellulophaga	genus
genus_Planktothrix	Planktothrix	genus
genus_Selaginella	Selaginella	genus
genus_Sphaerobacter	Sphaerobacter	genus
genus_Bifidobacterium	Bifidobacterium	genus
genus_Spodoptera	Spodoptera	genus
genus_Paraprevotella	Paraprevotella	genus
genus_Tetrasphaera	Tetrasphaera	genus
genus_Sedimentibacter	Sedimentibacter	genus
genus_Anaerostipes	Anaerostipes	genus
genus_Strigamia	Strigamia	genus
genus_Poecilia	Poecilia	genus
genus_Aequorivita	Aequorivita	genus
genus_Acetonema	Acetonema	genus
genus_Stanieria	Stanieria	genus
genus_Citricoccus	Citricoccus	genus
genus_Thermoanaerobacterium	Thermoanaerobacterium	genus
genus_Alcanivorax	Alcanivorax	genus
genus_Daphnia	Daphnia	genus
genus_Eggerthella	Eggerthella	genus
genus_Aquimarina	Aquimarina	genus
genus_Nakaseomyces	Nakaseomyces	genus
genus_Varroa	Varroa	genus
genus_Saprospira	Saprospira	genus
genus_Lunatimonas	Lunatimonas	genus
genus_Desulfotalea	Desulfotalea	genus
genus_Dielma	Dielma	genus
genus_Lysobacter	Lysobacter	genus
genus_Sordaria	Sordaria	genus
genus_Candidatus Protochlamydia	Candidatus Protochlamydia	genus
genus_Roseovarius	Roseovarius	genus
genus_Limnobacter	Limnobacter	genus
genus_Terriglobus	Terriglobus	genus
genus_Microchaete	Microchaete	genus
genus_N4likevirus	N4likevirus	genus
genus_Micromonas	Micromonas	genus
genus_Xylanimonas	Xylanimonas	genus
genus_Holtermannia	Holtermannia	genus
genus_Pseudopedobacter	Pseudopedobacter	genus
genus_Gramella	Gramella	genus
genus_Linum	Linum	genus
genus_Microbotryum	Microbotryum	genus
genus_Tsuchiyaea	Tsuchiyaea	genus
genus_Coboldia	Coboldia	genus
genus_Cellulosilyticum	Cellulosilyticum	genus
genus_Magnaporthiopsis	Magnaporthiopsis	genus
genus_Idiomarina	Idiomarina	genus
genus_Syntrophobacter	Syntrophobacter	genus
genus_Drechmeria	Drechmeria	genus
genus_Kribbella	Kribbella	genus
genus_Nakamurella	Nakamurella	genus
genus_Saccharothrix	Saccharothrix	genus
genus_Singulisphaera	Singulisphaera	genus
genus_Batrachochytrium	Batrachochytrium	genus
genus_Anaerosalibacter	Anaerosalibacter	genus
genus_Micromonospora	Micromonospora	genus
genus_Latrodectus	Latrodectus	genus
genus_Flaviramulus	Flaviramulus	genus
genus_Levyella	Levyella	genus
genus_Ahrensia	Ahrensia	genus
genus_Saccharomonospora	Saccharomonospora	genus
genus_Onthophagus	Onthophagus	genus
genus_Saccharina	Saccharina	genus
genus_Diachasma	Diachasma	genus
genus_Marinithermus	Marinithermus	genus
genus_Marinifilum	Marinifilum	genus
genus_Lentibacillus	Lentibacillus	genus
genus_Amyelois	Amyelois	genus
genus_Dermacoccus	Dermacoccus	genus
genus_Nitrospira	Nitrospira	genus
genus_Hyphomicrobium	Hyphomicrobium	genus
genus_Anditalea	Anditalea	genus
genus_Variovorax	Variovorax	genus
genus_Tamlana	Tamlana	genus
genus_Jeotgalibacillus	Jeotgalibacillus	genus
genus_Salimicrobium	Salimicrobium	genus
genus_Rickettsia	Rickettsia	genus
genus_Desulfobacula	Desulfobacula	genus
genus_Kineosporia	Kineosporia	genus
genus_Thermaerobacter	Thermaerobacter	genus
genus_Aeribacillus	Aeribacillus	genus
genus_Locusta	Locusta	genus
genus_Rubritepida	Rubritepida	genus
genus_Ignavibacterium	Ignavibacterium	genus
genus_Gordonia	Gordonia	genus
genus_Geitlerinema	Geitlerinema	genus
genus_Amycolatopsis	Amycolatopsis	genus
genus_Alteromonas	Alteromonas	genus
genus_Actinomadura	Actinomadura	genus
genus_Homalodisca	Homalodisca	genus
genus_Siansivirga	Siansivirga	genus
genus_Saccharibacillus	Saccharibacillus	genus
genus_Mastigocoleus	Mastigocoleus	genus
genus_Tannerella	Tannerella	genus
genus_Syntrophaceticus	Syntrophaceticus	genus
genus_Akkermansia	Akkermansia	genus
genus_Leifsonia	Leifsonia	genus
genus_Fictibacillus	Fictibacillus	genus
genus_Leavenworthia	Leavenworthia	genus
genus_Sporolactobacillus	Sporolactobacillus	genus
genus_Hammondia	Hammondia	genus
genus_Propionispora	Propionispora	genus
genus_Porphyrobacter	Porphyrobacter	genus
genus_Schlesneria	Schlesneria	genus
genus_Gimesia	Gimesia	genus
genus_Ewingella	Ewingella	genus
genus_Thermithiobacillus	Thermithiobacillus	genus
genus_Spirochaeta	Spirochaeta	genus
genus_Atopobacter	Atopobacter	genus
genus_Galbibacter	Galbibacter	genus
genus_Grosmannia	Grosmannia	genus
genus_Leersia	Leersia	genus
genus_Neochlamydia	Neochlamydia	genus
genus_Youngiibacter	Youngiibacter	genus
genus_Cokeromyces	Cokeromyces	genus
genus_Rotaria	Rotaria	genus
genus_Phoebis	Phoebis	genus
genus_Holcocephala	Holcocephala	genus
genus_Symbiobacterium	Symbiobacterium	genus
genus_Oryzias	Oryzias	genus
genus_Conidiobolus	Conidiobolus	genus
genus_Candidatus Microthrix	Candidatus Microthrix	genus
genus_Prochlorococcus	Prochlorococcus	genus
genus_Limnephilus	Limnephilus	genus
genus_Fopius	Fopius	genus
genus_Ostreococcus	Ostreococcus	genus
genus_Salinispora	Salinispora	genus
genus_Flagellimonas	Flagellimonas	genus
genus_Nematocida	Nematocida	genus
genus_Solimonas	Solimonas	genus
genus_Phaeodactylum	Phaeodactylum	genus
genus_Parvimonas	Parvimonas	genus
genus_Aureispira	Aureispira	genus
genus_Gracilimonas	Gracilimonas	genus
genus_Nocardia	Nocardia	genus
genus_Kluyvera	Kluyvera	genus
genus_Dechloromonas	Dechloromonas	genus
genus_Metrosideros	Metrosideros	genus
genus_Actinobacillus	Actinobacillus	genus
genus_Vitellibacter	Vitellibacter	genus
genus_Elioraea	Elioraea	genus
genus_Alistipes	Alistipes	genus
genus_Aphanizomenon	Aphanizomenon	genus
genus_Stigmatella	Stigmatella	genus
genus_Heterococcus	Heterococcus	genus
genus_Afipia	Afipia	genus
genus_Pectobacterium	Pectobacterium	genus
genus_Edaphobacter	Edaphobacter	genus
genus_Anaerophaga	Anaerophaga	genus
genus_Methylomonas	Methylomonas	genus
genus_Colwellia	Colwellia	genus
genus_Apophysomyces	Apophysomyces	genus
genus_Bhargavaea	Bhargavaea	genus
genus_Buchnera	Buchnera	genus
genus_Helicobacter	Helicobacter	genus
genus_Fluoribacter	Fluoribacter	genus
genus_Acidithiobacillus	Acidithiobacillus	genus
genus_Microplitis	Microplitis	genus
genus_Halalkalicoccus	Halalkalicoccus	genus
genus_Tipula	Tipula	genus
genus_Tolumonas	Tolumonas	genus
genus_Roseobacter	Roseobacter	genus
genus_Nesterenkonia	Nesterenkonia	genus
genus_Tribolium	Tribolium	genus
genus_Zhouia	Zhouia	genus
genus_Paraglaciecola	Paraglaciecola	genus
genus_Aphanocapsa	Aphanocapsa	genus
genus_Proteiniclasticum	Proteiniclasticum	genus
genus_Chelatococcus	Chelatococcus	genus
genus_Lewinella	Lewinella	genus
genus_Lichtheimia	Lichtheimia	genus
genus_Salinibacillus	Salinibacillus	genus
genus_Crassostrea	Crassostrea	genus
genus_Candidatus Babela	Candidatus Babela	genus
genus_Solenopsis	Solenopsis	genus
genus_Mangrovimonas	Mangrovimonas	genus
genus_Metschnikowia	Metschnikowia	genus
genus_Ilumatobacter	Ilumatobacter	genus
genus_Pseudohongiella	Pseudohongiella	genus
genus_Nonomuraea	Nonomuraea	genus
genus_Hypothenemus	Hypothenemus	genus
genus_Leeuwenhoekiella	Leeuwenhoekiella	genus
genus_Candidatus Puniceispirillum	Candidatus Puniceispirillum	genus
genus_Gelidibacter	Gelidibacter	genus
genus_Anaerolinea	Anaerolinea	genus
genus_Olleya	Olleya	genus
genus_Jatropha	Jatropha	genus
genus_Nitrosospira	Nitrosospira	genus
genus_Alishewanella	Alishewanella	genus
genus_Propionicicella	Propionicicella	genus
genus_Cycloclasticus	Cycloclasticus	genus
genus_Toxocara	Toxocara	genus
genus_Rhodnius	Rhodnius	genus
genus_Tatlockia	Tatlockia	genus
genus_Xenococcus	Xenococcus	genus
genus_Propionimicrobium	Propionimicrobium	genus
genus_Neptunomonas	Neptunomonas	genus
genus_Catenibacterium	Catenibacterium	genus
genus_Carica	Carica	genus
genus_Arsenophonus	Arsenophonus	genus
genus_Hydra	Hydra	genus
genus_Glossina	Glossina	genus
genus_Lentisphaera	Lentisphaera	genus
genus_Blastococcus	Blastococcus	genus
genus_Actinopolymorpha	Actinopolymorpha	genus
genus_Altibacter	Altibacter	genus
genus_Thermacetogenium	Thermacetogenium	genus
genus_Bombyx	Bombyx	genus
genus_Nitrobacter	Nitrobacter	genus
genus_Camponotus	Camponotus	genus
genus_Betapapillomavirus	Betapapillomavirus	genus
genus_Oleispira	Oleispira	genus
genus_Rivularia	Rivularia	genus
genus_Sneathia	Sneathia	genus
genus_Thermicanus	Thermicanus	genus
genus_Aquaspirillum	Aquaspirillum	genus
genus_Mycoplasma	Mycoplasma	genus
genus_Nereida	Nereida	genus
genus_Fenollaria	Fenollaria	genus
genus_Streptosporangium	Streptosporangium	genus
genus_Frondihabitans	Frondihabitans	genus
genus_Opisthocomus	Opisthocomus	genus
genus_Auxenochlorella	Auxenochlorella	genus
genus_Terracidiphilus	Terracidiphilus	genus
genus_Oryctes	Oryctes	genus
genus_Candidatus Nitrosotenuis	Candidatus Nitrosotenuis	genus
genus_Cellulosimicrobium	Cellulosimicrobium	genus
genus_Arcanobacterium	Arcanobacterium	genus
genus_Megamonas	Megamonas	genus
genus_Coxiella	Coxiella	genus
genus_Polyomavirus	Polyomavirus	genus
genus_Polistes	Polistes	genus
genus_Zunongwangia	Zunongwangia	genus
genus_Blastopirellula	Blastopirellula	genus
genus_Oligella	Oligella	genus
genus_Capsella	Capsella	genus
genus_Glycomyces	Glycomyces	genus
genus_Rubinisphaera	Rubinisphaera	genus
genus_Psychroflexus	Psychroflexus	genus
genus_Stomatobaculum	Stomatobaculum	genus
genus_Saccharicrinis	Saccharicrinis	genus
genus_Candidatus Hamiltonella	Candidatus Hamiltonella	genus
genus_Gemmata	Gemmata	genus
genus_Allofustis	Allofustis	genus
genus_Chlorobium	Chlorobium	genus
genus_Labrenzia	Labrenzia	genus
genus_Prorocentrum	Prorocentrum	genus
genus_Ethanoligenens	Ethanoligenens	genus
genus_Crocinitomix	Crocinitomix	genus
genus_Serinicoccus	Serinicoccus	genus
genus_Cotesia	Cotesia	genus
genus_Hyalangium	Hyalangium	genus
genus_Kineococcus	Kineococcus	genus
genus_Photorhabdus	Photorhabdus	genus
genus_Chilo	Chilo	genus
genus_Turicella	Turicella	genus
genus_Methanosaeta	Methanosaeta	genus
genus_Thermobifida	Thermobifida	genus
genus_Aeromicrobium	Aeromicrobium	genus
genus_Faecalicoccus	Faecalicoccus	genus
genus_Vollenhovia	Vollenhovia	genus
genus_Asticcacaulis	Asticcacaulis	genus
genus_Pelistega	Pelistega	genus
genus_Candidatus Aquiluna	Candidatus Aquiluna	genus
genus_Aplysia	Aplysia	genus
genus_Methylocaldum	Methylocaldum	genus
genus_Promicromonospora	Promicromonospora	genus
genus_Pseudochrobactrum	Pseudochrobactrum	genus
genus_Sedimenticola	Sedimenticola	genus
genus_Scardovia	Scardovia	genus
genus_Sediminibacter	Sediminibacter	genus
genus_Myxococcus	Myxococcus	genus
genus_Rhodopseudomonas	Rhodopseudomonas	genus
genus_Subdoligranulum	Subdoligranulum	genus
genus_Moelleriella	Moelleriella	genus
genus_Strongylocentrotus	Strongylocentrotus	genus
genus_Vittaforma	Vittaforma	genus
genus_Thlaspi	Thlaspi	genus
genus_Phascolarctobacterium	Phascolarctobacterium	genus
genus_Planctopirus	Planctopirus	genus
genus_Mytilus	Mytilus	genus
genus_Hyphomonas	Hyphomonas	genus
genus_Pseudooceanicola	Pseudooceanicola	genus
genus_Kibdelosporangium	Kibdelosporangium	genus
genus_Thermomonospora	Thermomonospora	genus
genus_Lelliottia	Lelliottia	genus
genus_Filomicrobium	Filomicrobium	genus
genus_Kangiella	Kangiella	genus
genus_Psychrilyobacter	Psychrilyobacter	genus
genus_Corvus	Corvus	genus
genus_Frigoribacterium	Frigoribacterium	genus
genus_Oceanospirillum	Oceanospirillum	genus
genus_Streptobacillus	Streptobacillus	genus
genus_Sinomonas	Sinomonas	genus
genus_Nakazawaea	Nakazawaea	genus
genus_Rhipicephalus	Rhipicephalus	genus
genus_Caballeronia	Caballeronia	genus
genus_Homolaphlyctis	Homolaphlyctis	genus
genus_Candidatus Methanoperedens	Candidatus Methanoperedens	genus
genus_Cardiobacterium	Cardiobacterium	genus
genus_Octadecabacter	Octadecabacter	genus
genus_Methylobacillus	Methylobacillus	genus
genus_Plantibacter	Plantibacter	genus
genus_Aliivibrio	Aliivibrio	genus
genus_Thermobispora	Thermobispora	genus
genus_Holospora	Holospora	genus
genus_Endocronartium	Endocronartium	genus
genus_Kuraishia	Kuraishia	genus
genus_Gammapapillomavirus	Gammapapillomavirus	genus
genus_Rhodoferax	Rhodoferax	genus
genus_Pseudoflavonifractor	Pseudoflavonifractor	genus
genus_Moritella	Moritella	genus
phylum_Basidiomycota	Basidiomycota	phylum
phylum_Ascomycota	Ascomycota	phylum
phylum_Streptophyta	Streptophyta	phylum
phylum_Firmicutes	Firmicutes	phylum
phylum_Actinobacteria	Actinobacteria	phylum
phylum_Proteobacteria	Proteobacteria	phylum
phylum_Bacteroidetes	Bacteroidetes	phylum
phylum_Arthropoda	Arthropoda	phylum
phylum_Chordata	Chordata	phylum
phylum_Nematoda	Nematoda	phylum
phylum_Cyanobacteria	Cyanobacteria	phylum
phylum_Rotifera	Rotifera	phylum
phylum_Deinococcus-Thermus	Deinococcus-Thermus	phylum
phylum_Cnidaria	Cnidaria	phylum
phylum_Chlorophyta	Chlorophyta	phylum
phylum_Verrucomicrobia	Verrucomicrobia	phylum
phylum_Spirochaetes	Spirochaetes	phylum
phylum_Apicomplexa	Apicomplexa	phylum
phylum_Euryarchaeota	Euryarchaeota	phylum
phylum_Acidobacteria	Acidobacteria	phylum
phylum_Chlamydiae	Chlamydiae	phylum
phylum_Chloroflexi	Chloroflexi	phylum
phylum_Platyhelminthes	Platyhelminthes	phylum
phylum_Mollusca	Mollusca	phylum
phylum_Fusobacteria	Fusobacteria	phylum
phylum_Echinodermata	Echinodermata	phylum
phylum_Candidatus Saccharibacteria	Candidatus Saccharibacteria	phylum
phylum_Thaumarchaeota	Thaumarchaeota	phylum
phylum_Planctomycetes	Planctomycetes	phylum
phylum_Priapulida	Priapulida	phylum
phylum_Phaeophyceae	Phaeophyceae	phylum
phylum_Ctenophora	Ctenophora	phylum
phylum_Chytridiomycota	Chytridiomycota	phylum
phylum_Bacillariophyta	Bacillariophyta	phylum
phylum_Chlorobi	Chlorobi	phylum
phylum_Microsporidia	Microsporidia	phylum
phylum_Tenericutes	Tenericutes	phylum
phylum_Nitrospirae	Nitrospirae	phylum
phylum_Eustigmatophyceae	Eustigmatophyceae	phylum
phylum_Ignavibacteriae	Ignavibacteriae	phylum
phylum_Entomophthoromycota	Entomophthoromycota	phylum
phylum_Xanthophyceae	Xanthophyceae	phylum
phylum_Lentisphaerae	Lentisphaerae	phylum
species_Stereum hirsutum	Stereum hirsutum	species
species_Pinus taeda	Pinus taeda	species
species_Preussia sp. BSL10	Preussia sp. BSL10	species
species_Propionibacterium acnes	Propionibacterium acnes	species
species_Trametes versicolor	Trametes versicolor	species
species_Botrytis cinerea	Botrytis cinerea	species
species_Pinus lambertiana	Pinus lambertiana	species
species_Aspergillus fumigatus	Aspergillus fumigatus	species
species_Fraxinus excelsior	Fraxinus excelsior	species
species_Aspergillus sp. Z5	Aspergillus sp. Z5	species
species_Malassezia restricta	Malassezia restricta	species
species_Malassezia globosa	Malassezia globosa	species
species_Melampsora pinitorqua	Melampsora pinitorqua	species
species_Quercus lobata	Quercus lobata	species
species_Canis lupus	Canis lupus	species
species_Cladosporium sphaerospermum	Cladosporium sphaerospermum	species
species_Escherichia coli	Escherichia coli	species
species_Penicillium citrinum	Penicillium citrinum	species
species_Acinetobacter baumannii	Acinetobacter baumannii	species
species_Schizopora paradoxa	Schizopora paradoxa	species
species_Fibulorhizoctonia sp. CBS 109695	Fibulorhizoctonia sp. CBS 109695	species
species_Betula nana	Betula nana	species
species_Penicillium capsulatum	Penicillium capsulatum	species
species_Talaromyces islandicus	Talaromyces islandicus	species
species_Staphylococcus epidermidis	Staphylococcus epidermidis	species
species_Phialocephala scopiformis	Phialocephala scopiformis	species
species_Propionibacterium humerusii	Propionibacterium humerusii	species
species_Corynebacterium durum	Corynebacterium durum	species
species_Rhizopogon vinicolor	Rhizopogon vinicolor	species
species_Musa acuminata	Musa acuminata	species
species_Tilletiopsis pallescens	Tilletiopsis pallescens	species
species_Trichinella papuae	Trichinella papuae	species
species_Phytophthora lateralis	Phytophthora lateralis	species
species_Staphylococcus aureus	Staphylococcus aureus	species
species_Cronartium comandrae	Cronartium comandrae	species
species_Sistotremastrum suecicum	Sistotremastrum suecicum	species
species_Pseudomonas psychrophila	Pseudomonas psychrophila	species
species_Atopobium vaginae	Atopobium vaginae	species
species_Baeospora myosura	Baeospora myosura	species
species_Aureobasidium pullulans	Aureobasidium pullulans	species
species_Amaranthus hypochondriacus	Amaranthus hypochondriacus	species
species_Phlebiopsis gigantea	Phlebiopsis gigantea	species
species_Humulus lupulus	Humulus lupulus	species
species_Mobiluncus curtisii	Mobiluncus curtisii	species
species_Alcaligenes faecalis	Alcaligenes faecalis	species
species_Penicillium paxilli	Penicillium paxilli	species
species_Triticum urartu	Triticum urartu	species
species_Capsicum annuum	Capsicum annuum	species
species_Filobasidiella depauperata	Filobasidiella depauperata	species
species_Picea glauca	Picea glauca	species
species_Penicillium digitatum	Penicillium digitatum	species
species_Aspergillus ruber	Aspergillus ruber	species
species_Ophiognomonia clavigignenti-juglandacearum	Ophiognomonia clavigignenti-juglandacearum	species
species_Aspergillus niger	Aspergillus niger	species
species_Wallemia mellicola	Wallemia mellicola	species
species_Byssochlamys spectabilis	Byssochlamys spectabilis	species
species_Fusarium fujikuroi	Fusarium fujikuroi	species
species_Mycobacterium llatzerense	Mycobacterium llatzerense	species
species_Peniophora sp. CONT	Peniophora sp. CONT	species
species_Phanerochaete carnosa	Phanerochaete carnosa	species
species_Penicillium fuscoglaucum	Penicillium fuscoglaucum	species
species_Sistotremastrum niveocremeum	Sistotremastrum niveocremeum	species
species_Phanerochaete chrysosporium	Phanerochaete chrysosporium	species
species_Lentinula edodes	Lentinula edodes	species
species_Bacillus cereus	Bacillus cereus	species
species_Condylostylus patibulatus	Condylostylus patibulatus	species
species_Pseudotsuga menziesii	Pseudotsuga menziesii	species
species_Postia placenta	Postia placenta	species
species_Cryptococcus albidus	Cryptococcus albidus	species
species_Corynebacterium diphtheriae	Corynebacterium diphtheriae	species
species_Oidiodendron maius	Oidiodendron maius	species
species_Gelatoporia subvermispora	Gelatoporia subvermispora	species
species_Piloderma croceum	Piloderma croceum	species
species_Gymnopus luxurians	Gymnopus luxurians	species
species_Salmonella enterica	Salmonella enterica	species
species_Aegilops tauschii	Aegilops tauschii	species
species_Aedes albopictus	Aedes albopictus	species
species_Phellinus noxius	Phellinus noxius	species
species_Adineta vaga	Adineta vaga	species
species_Histophilus somni	Histophilus somni	species
species_Necator americanus	Necator americanus	species
species_Pleurotus salmoneostramineus	Pleurotus salmoneostramineus	species
species_Dioszegia crocea	Dioszegia crocea	species
species_Marchantia polymorpha	Marchantia polymorpha	species
species_Liriomyza trifolii	Liriomyza trifolii	species
species_Penicillium oxalicum	Penicillium oxalicum	species
species_Daucus carota	Daucus carota	species
species_Raoultella ornithinolytica	Raoultella ornithinolytica	species
species_Lucilia sericata	Lucilia sericata	species
species_Segetibacter koreensis	Segetibacter koreensis	species
species_Oribacterium sinus	Oribacterium sinus	species
species_Puccinia graminis	Puccinia graminis	species
species_Ustilago hordei	Ustilago hordei	species
species_Alternaria alternata	Alternaria alternata	species
species_Fomitiporia mediterranea	Fomitiporia mediterranea	species
species_Streptococcus pneumoniae	Streptococcus pneumoniae	species
species_Zea mays	Zea mays	species
species_Sanghuangporus baumii	Sanghuangporus baumii	species
species_Triops cancriformis	Triops cancriformis	species
species_Glarea lozoyensis	Glarea lozoyensis	species
species_Castanea mollissima	Castanea mollissima	species
species_Juglans regia	Juglans regia	species
species_Pyrenochaeta sp. UM 256	Pyrenochaeta sp. UM 256	species
species_Bacillus niacini	Bacillus niacini	species
species_Neurospora tetrasperma	Neurospora tetrasperma	species
species_Talaromyces purpureogenus	Talaromyces purpureogenus	species
species_Hordeum pubiflorum	Hordeum pubiflorum	species
species_Klebsiella pneumoniae	Klebsiella pneumoniae	species
species_Plicaturopsis crispa	Plicaturopsis crispa	species
species_Leucoagaricus sp. SymC.cos	Leucoagaricus sp. SymC.cos	species
species_Acinetobacter radioresistens	Acinetobacter radioresistens	species
species_Amorphotheca resinae	Amorphotheca resinae	species
species_Paenibacillus polymyxa	Paenibacillus polymyxa	species
species_Alternaria arborescens	Alternaria arborescens	species
species_Paenibacillus sophorae	Paenibacillus sophorae	species
species_Penicillium brasilianum	Penicillium brasilianum	species
species_Lactococcus lactis	Lactococcus lactis	species
species_Paraphaeosphaeria sporulosa	Paraphaeosphaeria sporulosa	species
species_Enterococcus cecorum	Enterococcus cecorum	species
species_Staphylococcus warneri	Staphylococcus warneri	species
species_Nostoc punctiforme	Nostoc punctiforme	species
species_Botryobasidium botryosum	Botryobasidium botryosum	species
species_Musa itinerans	Musa itinerans	species
species_Bacillus sp. UNC41MFS5	Bacillus sp. UNC41MFS5	species
[truncated: 2,586 more rows]

## Sheet: exposome_bio_expression_data
Supplemental Data S1. All exposome and internal multi-omics data used in this study.
chaoexpo22_I12	chaoexpo51_I6	chaoexpo56_I5	chaoexpo44_I15	chaoexpo28_I15	chaoexpo74_I6	chaoexpo56_I12	chaoexpo70_I6	chaoexpo62_I6	chaoexpo75_I12
52413.4	344128	621480	406137	80687	320683	19465.2	1227.66	4283.74	108613
57151.3	18204.4	1215.83	112.77	1389.93	5027.65	4872.25	13.055	4295.44	41.5943
5737.45	3706.35	4441.81	6326.12	207903	3255.38	44922.3	7873.55	12271.1	4519.45
104394	4730.44	1020.8	5378.69	6679.84	13989.3	16174	12536.7	16585.2	863.002
244.844	9.25833	1198.33	158.151	2465.56	21.1307	19098	4479.48	48.7298	20.1846
4482.59	21022.9	42748.1	65732.1	42686.1	8822.21	114638	16.5398	20047.9	8479.07
56.1437	168.562	0.340509	7910.74	120.247	6373.24	546.754	542.213	285.617	26.516
526.789	537.642	678.598	469.969	370.013	4161.63	11187.5	47253.9	7295.56	244.335
716.587	46.7699	80.2917	107.289	0	0.172904	0	8.61374	370.123	0
361.773	2859.31	207.098	1485.29	229.876	471.154	3603.35	241776	138.351	7.84118
434.067	24.8586	0.357385	428.331	49.7847	233.711	333.544	36766.8	14011.4	140050
24.0987	103.859	2879.02	107.604	164.271	0	2708.76	12.7065	139.449	2128.16
5918.94	313.302	37.5621	34308.5	10.4903	245674	11.3785	0	0	0
637.278	70.5027	379.372	233.26	2509.19	75.2665	561.508	254.102	50.1427	0.349802
68.3985	4036.24	1804.86	6897.02	2011.91	3620.73	13863.8	23.1885	1293.35	158.568
1138.03	14.7504	0.208197	29.7767	75.8681	51.9169	19.6853	1504.11	734.294	29.4531
4308.14	6.20352	10.688	47.5349	1183.62	9.64356	43.1791	0	0	141.535
39.9583	3.01474	61.3021	6.30689	0	0	202.725	0.298872	0	0
4.24219	4.48384	24.8493	426.935	23.1318	59.5684	4117.93	151.135	59.8314	145.901
10.3956	57.8445	3006.32	329.572	1.85461	31.2112	37.8807	5192.93	7.81972	70.8669
1766.16	11985.4	25877	20179.4	4355.96	11479	29833.2	43.6557	3356.06	3378
182638	142.689	46.7834	134.496	0	196.74	43.718	47.5475	10.1753	0
3699.14	11963.8	9016.62	11140.3	2051.25	519.121	312.308	0	517	5.28609
25.6003	61.3096	0.451908	5330.34	89329.3	4933.75	371.424	12612.6	25.9054	1198.93
6279.4	415.721	179.766	777.354	2662.87	1946.13	1614.27	26.6268	346.603	1.26852
419.639	4372.48	5075.82	8775.5	4092.26	12046.9	4649.98	1.8359	5.76465	19.2277
3.23825	0	0	0	49.7712	3.73009	0	0	0	0
3.25302	26.4416	0	0.908606	0	0	0	0	0	0
44323.8	95.0893	18.6698	30.3614	17.7136	275.559	987.193	251.482	22.1639	0.788753
0	0.268307	0	31.4264	0	0	0.483012	188.066	0.765373	0
154.414	477.513	336.61	643.553	14.7209	157.827	1526.44	0	0	14.9722
631.049	2484.71	4650.84	4553.28	716.954	2869.31	4151.22	156.768	264.912	274.128
593.139	32.0187	48.754	193.514	0.494852	6.74985	72.7076	0	35.9207	0
167.44	25.5646	0	28.6399	0	34.7541	0	0	258.755	0
160498	1024.99	0.231871	76.0799	0	0	258.222	0	1.11915	8789.99
3.31045	175.468	226.415	1841.42	10373.1	1170.05	2862.85	1.9819	4.4685	2.03524
2529.45	768.414	26.9487	365.412	141.471	460.901	724.944	6.35796	518.528	0.94652
188.889	692.645	3380.9	1142.43	250.508	521.705	334.8	0.610642	0	20.082
0	0	0	0	0	0	0	0	0	0
21.76	96.3643	0	0.0675799	0	0	0	0	0	0
930.72	115.127	783.914	674.767	871.088	244.223	2752.51	1799.84	0.725761	0.241241
0	6110.64	0	1768.79	0	18.3501	0	0	0	0
1481.62	119.757	5.28882	459.933	43.9859	181.493	364.734	3143.14	370.648	53.2091
22295.1	64.6413	0	50.0067	13297.3	1992.37	0	0	1.54284	0
3082.93	275.913	2.97805	518.583	404.197	256.65	1983.27	1034.03	79.7404	0.177067
0	0	0	0	0	0	0	0	0	0
7.33427	0.161334	0	25.3666	0.163511	40.1329	28.3344	18.5885	42.4455	1.97678
3.72715	0	0.341971	0	0	0	0	0	0	0
1979.86	38.5007	69.6573	60.0276	112.313	373.91	129.6	0	0	36.0163
638.448	39.5822	176.1	30.5144	0	0	52.5645	340.408	2191.9	0
146.488	8.47607	5.71384	121.916	60.213	58.4592	198.288	1187.43	196.456	10.703
0	131.072	12.1345	4.73656	0	0.306113	0	0	0.820783	0
37.124	8.89571	0	89.5526	0	0	0	1203.35	0	0
221.112	120.164	29.84	175.379	284.889	424.772	9294.4	742.561	1605.9	3.59507
265.719	600.729	500.916	420.979	46.4334	589.697	1441.29	3680.77	533.73	243.976
5.96909	0.758707	53.6618	95.3026	0	199.591	5.77688	0	0	0
3035.72	64.3952	12.1851	442.709	9184.87	186.937	151.793	11545.3	2.59234	999.863
101.419	6.72199	131.018	7.60166	122.046	0	1203.3	19.4554	22.822	31.9635
3958.86	770.637	3.32067	1770.98	2.28938	2055.24	473.768	0	1074.13	0.701084
175.402	966.582	45.5325	1134.52	71.389	30.2546	29.7696	0	0.913631	0
100.653	634.619	25.3395	634.026	7.67109	111.022	10799.7	0	0	91.1926
26.7437	16.5732	50.5202	16.4936	0	0.358972	87.1764	36015.8	22.366	0
713.214	143.613	29.4168	102.748	268.398	156.793	599.844	568.824	3278.52	35.5383
253.045	39.9515	21.4998	295.661	1654.35	603.626	74.8492	576.424	0.352517	2564.88
748.875	2480.54	1302.79	1157.63	17.0346	264.018	152.72	0	3.37442	0
91.7907	436.334	190.127	747.792	46.5409	1093.29	905.963	48.5951	22.579	302.138
65.5012	0.953927	4.8277	6.77644	0	2.82421	0	0	125.343	0
2390.45	1.02604	18.7885	19.1223	0	0	0	318.218	52.849	0
9.53577	30.6208	0	929.833	2.15214	186.449	0	624.108	0	3.92434
0	0	0	0	0	0	0	0	0	0
50.7823	144.394	436.148	138.762	1196.8	152.064	89.9174	0	0.463012	0
0	0	0	0	0	43.3039	0	0	0	0
200.82	1.41906	0	0	0	0	0	1.14552	0	0
5.22209	0	0	0.774662	0	0	0	0	0.465793	17.9838
8.61252	0	0	0	0	0	0	0	0	0
3582.1	655.05	2.65911	1899.83	10.1064	619.476	313.386	0	383.272	7.41064
11.3323	0	0	55.3402	13.0173	0	22.0757	1008.44	0	9.61355
10.9161	38.7175	1.16765	11.2135	0	0	0	0	0	0
32.5169	0	0	2.36979	1.97753	0	77.6217	0	57.1549	0
0	179.648	321.554	200.023	15.5901	30.9998	1039.59	0	27.1205	0
0	0	0	0	0	0	0	2033.7	0	0
0	0	0	8.11489	0	247.321	0	0	0	10473.4
103.507	2537.7	2681.35	5414.7	159.506	573.775	621.577	0.512256	2587.12	1.32315
376.107	122.15	3.79949	121.59	0	6.52801	32.8093	0	0	0
2.20231	9.11039	4.3993	449.422	8.1963	615	0	161.127	0	3.91137
0	170.724	0.433425	7.87261	0	0	0	0.235206	0	0
0	0	0	0	0	0	0	0	95.2078	2198.28
0.373826	1.99365	7.33648	0.920246	0	0	7.67108	1935.33	0	0
0	0	0	102.215	3.40688	0	9.46728	2.89615	0	89.3065
131.65	1422.63	0	15.4891	0.213857	3.05115	165.593	5664.97	0	71.5659
336.992	22.5923	0	31.4624	0	15.3022	0	0	0	1.6653
158.528	108.605	474.322	343.121	23.4494	6.3463	572.576	0	0.719573	0
13.5037	595.649	319.863	391.857	36.1494	380.458	723.78	0	4.6443	0.683031
5.85041	0	0.514828	0.252858	0	0	0.970482	2.57571	0	125231
9.79237	16.5028	24.2126	0.728993	0	86.1808	47.2959	0	717.298	17.4695
132.984	12.9487	0	0.311395	2.10368	69.0437	19.7667	0	0	0
19.1825	12.9858	0	25.1855	10.4201	75.0611	156.959	25269.4	0.404505	6.0815
93.7495	727.036	1998.66	1706.79	1148.9	284.84	569.627	1.26916	90.1896	0
577.785	0	0	3.39349	105.613	0	4.63381	0	0.401727	0
12.0289	0	16.5935	76.8554	22.1077	119.908	74.2583	0	0	0
237.097	896.434	439.663	618.919	261.2	693.368	487.621	0.252044	34.356	18.3585
35.1122	7.93772	0.305167	92.4287	178.896	107.952	12.2304	50187.2	0	0
18.5342	0.139266	0	0	0	0	22.1064	0	0	1.96824
0	4.99728	0	15.5494	0	0	0	8.45379	79.0339	0
229.188	0	0	2634.67	20.1178	31.6777	23.721	0	0.362108	0.215519
15.617	229.548	45.5982	67.9421	38.1914	67.3162	227.626	0	3.64866	0
0	0	0	0	0	0	0	0	0	0
0	0	0	9.24797	0	0	0	0	0.450936	0
663.413	152.758	0	410.519	0	15.7671	17.3891	0	70.8604	1.20903
38.1643	388.493	151.707	449.368	2.17325	110.068	24.7224	1.93796	0	0
26.2553	90.0106	0	0	32.723	0	90.9072	0	0	0
0	0	0	0	0	0	0	0	0	0
24.1231	8.28886	54.9603	71.2398	0.170814	141.768	543.544	10.0347	0	0
178.311	65.4556	1.55762	239.778	3.79751	79.1422	19.0588	11030	127.324	1062.78
6.84538	114.829	104.627	100.739	31.6302	3.28201	18.3643	0	0	0
0.639661	0.079987	0	301.611	0	67.4312	0	1.89165	13.1004	0
106.4	107.523	89.7773	9.1783	0	0	0.634756	3.13901	0	5.08281
1.04953	0	0	0.225422	0	0	29.0805	0	0	0
31.7849	2.87067	0.278415	12.7443	0	0.531413	183.944	0	5.03301	0
0	0	0	0	0.414451	0	0	0	0	0
137.165	648.828	404.682	1991.22	974.475	443.569	1319.11	0	0	0
0	0	0	0	0	0	0	0	0	0
68.3675	55.5763	0	0.980016	0	163.55	137.333	0	0	3977.53
0	89.6193	0	0.172405	0	0	0	2.02718	13.7475	0
84.1832	0	19.7598	3.79899	2.69464	0.560277	52.2668	0	313.965	0
89.8365	4.68537	0	0.241828	0.420949	0	0	0	0	0
164.681	0	0	8.16441	0	0	6.41657	0	0	8.08414
0	0	0	0	0	0	0	0	0	0
0.0547043	0	0	0.618352	1.1562	0	0	2.02821	0	0
3.35581	179.75	46.8259	101.816	0	66.0348	61.6	5.52421	0	0
18.109	0.379602	0	0.682865	0.73984	0	0	7.94838	0	12.2045
0	0	0	0	41.1806	0	0	0	0	0
215.739	1082.96	772.577	510.127	72.6407	358.332	2500.8	0.268889	35.9021	80.8776
54.8475	33.502	16.5828	6.2888	0	1182.76	4.22242	0	1.51313	0
16.6803	0	0	16.4988	0	0	0	1139.67	1.93404	0
34.4269	1160.53	1969.53	1593.44	19.3833	442.396	154.652	0.957937	0	0
95.9362	3.44303	0	0	0	0	0	1.65199	0	0
10.4468	0.926689	9.5941	8.57155	0	0	0	0	0	10.6371
0	0	0	0	0	0	0	0	0	0
5.64793	0	0	27.0456	0	4.09691	0.642814	8.51933	0	0.0944662
23.0039	4.40212	30.8006	4.44036	0	0.259479	1.85101	2.05665	4.40102	0
0	0	0	0	0	0	0	0	52335.5	0
0	0	0	134.287	0	0	0	0	0	0
5.1726	9.56716	0	0	0	0	0	0.280464	0	0
0.506156	13.5703	16.6358	14.2717	0	2.25356	0	0.775346	0	0
3.26389	17.0941	0	0	847.02	0	0	0	0	0
4.88112	2.67125	0	20.8713	1.49702	20.5409	0	567.877	0	8.71514
225.074	64.0884	0	52.7229	0	23.4847	1.19296	3.48523	0	0
0	0	2.05606	2.06546	0	0	2.92225	0	0	0
0	0	0	2.85958	0	0	0	0	0	11.5871
0	0	0	0	0	0	0	0	0	0
170.941	48.9852	26.0136	96.8367	0.579047	4.32198	63.6724	490.75	0	0
0.399939	0.198304	0	9.94112	0	0.63853	2.60484	12.7454	0	0
32.3805	0.108829	30.8547	12.8318	0	0	33.8524	0	0	3983.56
0	0	0	0	0	0	0	3.88173	0	0
0	0	0	0	0	0.363127	0	0	0	0
2.83678	375.878	983.706	1037.61	5.41744	16.2004	336.813	0	4959.48	0
2.988	2.68949	0	0	0	0	0	0	0	0.846376
13.8971	10.5843	1.67081	0	0	0	0	0	0	0.639512
37.7203	0	0.186794	10.2288	0	0	0	0	0	0
1525.48	129.366	2.21399	351.421	1.13724	6.24333	13.5178	43.6221	0	0
0	0	0	0	0	0	0	0	0	0
0.0821126	0.538595	0	55.5628	0	42.5178	0	242.44	23.9281	0
0.0890858	0	0	0	0	0	0	0	0	0
0	0	0	0	33.2629	0	9.71751	0	0	0
3.30524	0	0.166526	51.9626	0	0.337272	0	0.274142	18.0145	0
0	30.4155	0	0	0	0	0	0	0	12.8571
0	0	0	0	0	0	0	0	0	0
5.35949	0	0.178687	59.5964	8.63207	148.322	0	0	11.7194	0
0.131385	156.716	28.6696	25.0885	9.17539	81.6746	0.368863	2.44652	0	0
0	31.8725	216.287	325.238	0	81.3625	102.099	0	0	1.62683
2.38391	2162.17	0	0	0	0	0	0	0	0
18.6771	10.0494	0	0	0	0	0	0	0	18.8636
0.326566	5.95576	0	0.754443	0	0	0	0.736941	0	0
80.0629	7.40185	68.8583	27.8557	0.270169	18.7836	31.8223	0	0	0
0	0.634479	0	0	0	16.5085	0	0	0	0
0	0	0	0	47.049	0	0	4865.35	0	0
21.1043	87.2614	122.841	140.163	3.32621	51.9469	0	0	13.9367	0
41.3199	14.9834	38.9817	38.6267	0	11.648	19.3352	0	0	0
0	96.0819	205.815	123.624	2379.07	1.87013	119.655	0	6.38059	0
15.5944	144.188	31.5309	153.195	20.4415	23.742	32.8725	0	0	4290.83
1232.46	13.4023	18.1297	1.04729	2.74148	0	0	0	0	0
36.3153	2.73571	0	8.18813	2.0333	2.46987	36.7744	0	0	15.5478
0	76.9191	0.649255	0	0	125.271	0	8168.35	21.2166	0
45.6675	16.5265	0	4.65809	5.90631	31.7957	51.4847	0	0	0
7.85117	0.777808	3.14667	7.30728	0	30.0722	1496.62	0	0	0
0	0	0	0.409783	0	0	0	0	0	18.3539
12.7932	224.227	114.002	213.18	11.2691	92.611	133.739	0	526.436	0
145.82	48.7005	0	46.0561	24.6672	0.375593	0.814046	0	8.59441	0
16.13	93.4733	50.9247	95.2686	649.19	56.4249	24.7926	0	20.8922	0
12.0743	43.9092	0	0	0	0	0	0	0	0
0	1934.06	0	0	1.37359	0	0	0	0	0
0.208062	0	0	0.135165	0	0.193457	3834.16	0	0	0
7.35825	0	19.6323	22.1525	0	0	6.7823	0	0	0
148.053	3.8342	0	0	0	0	0	2.46439	0	524.065
0.850325	4.95527	348.333	158.299	0	136.303	45.7826	0	0	0
0	0	0	0	0	0	0	0	0	0
16.4656	6.95814	33.2721	240.578	0	4.16315	432.089	0	30.8521	0
34.3349	0	0	0	0	0	0	0	0	0
0	0	0	3.29189	24.3757	0	0	0	0	0
34.6378	15.2403	0	55.4022	2.29345	194.465	0	0	0	0
0	0	0	11.2393	0	0	10.9112	0	0	0
309.821	141.155	966.641	5.32595	0	0	92.208	0	0	0
0.605636	0.832167	0	0	0	0.194834	0	0	0	0
2.00087	0.38576	0	0.723787	0	0	0.888575	0	0	3.74037
0	14.2574	0	11.4086	0	0	0	0	0	0
0	0	0	0	0	0	0	0	0	0
789.598	14.2247	8.48872	57.516	0.159445	18.6082	100.908	17.0875	0	0
51.724	94.8334	21.4897	0	0	0.304951	0	2.6228	0.280399	1.83853
0.340273	0	0	0	0	0	0	0	0	0
0.255912	1.55365	0	0	3.76856	0.229231	3.49253	13.0059	0	0
53.3355	9.96341	7.38078	1.43026	0	0	6.0367	3.13611	0	0
661.174	30.5873	0	0	0	0	3.1181	0	0	7.15319
192.867	17.3046	7.29692	2.34375	26.0005	73.8846	25.4722	0	0.3844	26.3499
2.82863	0.713963	0	0	0	0	0	0	0	0
0	2.26935	0	1.82195	0	1.69075	0	0	0	0
0	10.7517	21.2013	20.3275	0	42.509	0	0	0	0
0	0	0	2.11894	0	0	0	0	0	0
0	0	0	0	0	0	0	0	0	0
3.31422	102.736	48.5731	152.696	0	67.8419	0	0	0.561428	0
36.2792	22.6633	65.5234	2.8415	0	3.58809	30.2466	0	0	0
3.39929	0	0	0	0	0	0	0	0	0
13.4212	52.6015	48.5161	13.8983	1.46453	0	32.0916	0	0	0
19.2193	41.178	7.97486	38.6296	5.53492	55.1994	0	19.0689	0	0
0.743047	0	0	0	0	0	0	0	0	0
171.003	67.9106	0	6.99788	0	3.66891	145.036	0	0	0
49.203	5.92521	16.6508	14.6884	0	0	0	0	0	0
313.101	13.5982	0	0.828289	0	0	0	0	0	0
0.35504	45.0811	58.8966	83.4663	12.2179	14.8231	93.4567	0	248.811	2.47038
0	0.173532	0	0	0	0	0	0	0	0
26.915	23.2101	0	7.55737	0	0	46.4917	9.20597	13.0468	0
95.2341	0	0	11.1512	0	20.5895	33.7091	12.4	0	903.749
32.1285	26.3386	58.4097	52.7647	6.46533	272.575	117.622	0	0	0
133.151	35.0144	5.58574	45.4768	0	0	11.1117	0	0	0.229983
2.68388	0	0	28.9471	0	0	0.344904	0	0	0
0	0	0	0	0	0	0	0	0	0
0	0	0	82.827	18.3381	31.8973	11.727	208.301	71.9312	0
0.441761	0	0	0	0	0	0	0	0	186.828
20.857	77.0514	68.3677	102.908	15.6045	124.888	77.8359	0.238631	0	0
0	0.529839	0	30.1354	0.291282	0	0	0	0	0
0.437624	0.379972	0	0	0	0	0	80.0482	0.285971	0.401242
28.3548	0	5.86221	0.850827	1.06118	0	26.5942	0	0	0
76.1202	1.09259	0	0.499132	0	5.22134	46.5253	0	0	0
0	0	0	0	0	0	0	0	0	0
13.7204	1.73347	0	10.4911	0	6.14797	0	0	0	0
0.326216	85.9794	9.31861	146.693	1.46345	45.812	37.2164	0	0	10.8115
4.1036	29.1755	1.12208	4.8993	0	39.8909	0.352305	0	0	0
0	16.7617	0	0	0	0	0	0	0	0
15.3942	4.86962	9.35915	4.42348	0.365465	13.0689	2.39222	0	0	0
0	0	0	0	0	0	0	0	0	0
0	259.672	0	0	0	0	0	0	0	0
0	0	0	0	0	0	3.28618	0	0	0
0.950165	0	0	0	0	0	0	0	0	1861.59
68.4135	32.4322	25.2006	19.6745	0	2.68731	13.9999	0	0	0
0	33.4169	55.5442	120.128	0	12.264	81.1639	0	0	0
0	0	0	0.364572	0	0	0	2.56046	0	9.70121
20.6339	0	0	0	0	0	0	0	0	0
0.114012	0	0	0	0	0	0	0	0	0
7.16567	20.0801	30.3491	42.8589	34.8273	3.88938	16.3865	0	0	0
29.0656	0	0	3.48225	1.37844	0	1.84788	0	0	0
35.8026	10.1259	0.20269	0.122442	0	0	62.9458	2.82275	0	0
0.550346	0	0	0	0	0	0	0	0	0
0	0	0	0	0	0	0	0	0	0
22.637	55.0388	63.2206	127.061	0	18.9099	41.2704	0	0	0
116.617	7.54456	48.9731	0.364886	0	19.0838	10.3789	0	0	0
0	0	0	0	0	0	0	0	0	0
11.0755	97.1882	375.958	95.3253	0	52.3885	5.35318	0	0	0
0	9.02339	0	0.169488	0.462914	0	0	58.8374	0	0
393.793	4.41089	3.30332	0	0	0	36.5042	34.1953	0	0
0.313449	0	0	0	0	0	0	0	0	0
0.310028	84.7346	50.6414	57.2401	0	9.25385	201.308	0	20.0042	0
0	0	0	0	0	0	0	0	0	0
0	0	0	0	0	0	0	0	0	0
12.7032	0	0	0	0	0	0	0	0	0
0	0	0	0	0	0	0	0	0	0
0	0	0	0	0	0	0	0	0	0
0	0	0	0.190484	0	0	0	0	10.9663	2.2143
29.1303	19.0063	49.404	13.7292	19.4144	40.3319	159.675	0	2.56944	0
63.7083	7.87805	0	75.9283	0	0	0	0	0	0
0	0	0	0	0	0	0	0	0	0
0	0	0	0.198608	0.473197	0	0	0	0	0
0.579765	11.5125	9.69382	16.7065	0	0	0.690049	0	0	0
0	0	0	0	0	0	0	0	0	0
0	0	0	0	0	0	0	0	0	0.191037
0	0	0	0	0	0	26.0362	0	0	0
0.311208	0	0	0	0	0	0	0	0	0
110.96	0.756495	0	0	0	0.429845	0.75563	9.40038	0	0
0.619811	0	0	0	0	0	0	0	0	0
9.42871	0	0	0	0	0	0	0	0	0
0	0	0	5.46847	0	0	0	0	0	0
0	0	0	0	0	0	0	0	0	0
9.29807	0.563231	0	0	0	0	0	0	0	0
28.8785	0	0	117.137	0	0	0	0	208.868	0
0	0	0	0	0	0	0	0	0	0
18.1119	0.298383	0	1.72603	0	0	23.6805	0	0	0
2.13922	0	0	1.21631	0	0	0	0	0	0.27759
86.4202	0	0	0	0	0	0.267241	0	0	0
0	0	0	0	0	0	0	0	0	0
0	19.4986	0	0.259906	0	0	0.969141	0	0	0
6.8919	5.59862	0.843824	61.345	0	0	0	0	1.1374	0.249028
0	0	0	0	0	0	0	0	0	0
0	0	0	0.330402	0	0	0	0	0	84.4686
0.319243	0	0	0	0	0	0	0	0	0
102.081	1.65349	0	0	0	0	0	0	0	0
0	0	0	0	0	0	0	0.515659	0	0
0	0	0	0	0	0	0	0	0	0
0	3.72414	6.0933	0.900942	0	0	0	0	0	0
2.24213	2.51276	0	55.4884	0	0	0	0	0	0
20.1309	0	0	0	0	0	0	0	0	0
4.79028	0.288891	0	24.1536	0	0	104.421	0	0	0
0	0	0	0	36.0163	0	0	0	82.3897	0
23.622	0	0	0.281361	0	0	17.9695	0	0	20.7999
0	31.0416	0.280519	11.3637	0	0	0	0	0	0.151964
0.802	0.752672	0	0	0	0	0	0	0	0
0	0.840791	0	0	0	0	0	0	0	0
0	2.83529	0	0	0	0	0	0	0	0
0	0	0	0	0	0	0	0	0	0
0	0	0	0	0	0	0	0	0	0
2.37695	0.157019	0	0	0	0	1.19119	0	0	0
0.330464	2.74409	9.1258	38.9681	0	0	0.0991534	0	40.934	0
0	0	0	0	0	0	0	0	0	0
3.21109	0	17.1735	4.52448	0.278294	0	6.31919	44.7906	0	0
2.07186	17.8626	0	0	0	33.3713	4.88763	0	0	0
0.458073	0	9.00545	0.127958	0	0	0	0	0	0
0	0	0	1.40021	0	0	0	0	0	0
6.9075	0	0	17.6789	0	0	68.7717	0	0	0
0	3.86046	9.63998	2.09718	0	0	2.33067	0	0	0
2.35059	0	4.91574	0	0	0	0	0	0	0
0	0	0	0	0	0	0	0	0	0
0	0	0	0	0	0	0	0	0	0
11.476	0	0	0	0	0	0	9.74084	0	0
1.67254	7.95682	0	17.1224	0	73.2087	35.3058	0	0	0
10.2241	0	0	0	0	0	0	0	0	0
34.4903	14.2084	0	0	0	0	0	0	0	0
0	0	0	2.17136	0	0	1.50947	0	0	0
95.6937	0.279275	0	0	0	0	5.2892	61.6283	0	0
0.500954	0	0	0	0.326205	0	0	0	0	0
34.8161	0	0	0	0	0.788811	0	0	121.926	0
46.9674	0.897616	0.255552	21.7744	0	1.06607	0	0	4.50038	0
0	0	0	0	0	0	0	0	0	0
0	0	0	0	4.37683	0	0	0	0	0
0	0	0	0	1.12831	0	0	0	0	0
36.2077	0.216913	0	0.123976	0	0	0	0	0	0
2.92514	0	0	32.8272	0	0	0	0	0	0
0.571139	0	0	0	0	0	0	0	0	0
0	0	0	0.766396	0	0	0	0	0	0.847119
0	32.6545	9.42322	31.2218	0	14.0196	0	0	0	0
9.35536	0	0	0	0	0	0	9.54826	0	0
139.8	26.3542	0.657352	14.1478	0	0	0.55687	0	0	0
0.423449	0	0	0	0	0	0	0	0	0
0	12.6785	2.02039	2.93484	0	0	0	0	0	0
0	0	0	0	0	0	0	0.506459	0	0
61.1766	2.99909	0	5.04306	0	0	0	0	0	0
0	7.24039	0	0	0	0	0	0	0	0
0	0	0	0	0	0	0	0	0	19.3397
0.32148	8.02335	0	11.6845	0	0	0.708841	0	0	0
0.746463	0	0	0	0	0	0	13.7881	0	0
1.88875	20.8217	0.280845	17.5595	14.7907	0	0	0	0	0
83.9534	11.0104	0	0	0	0	0	0	0	0
0.361424	0.527124	0	1.51944	0	0	6.4253	0	0	0
0	0	0	8.47027	0	0	0	0	0	0
0	0	1.68377	0	0	0	0	0	0	0
0	0	0	0	0	0	0	0	0	0
0	0	0	1.94639	0	0	0	0	0	0
0	0	0	0	0	0	0	0	0	0.354501
0	0	0	0	0	0	0	0	0	0
0	0	0	1.9729	0	0	0	0	0	0
0.953703	0	0	0.782174	0	0	0	0	0	0
0	0	0	0	0	0	0	0	0	0
0	0	0	2.80841	0	0	1.08263	0	0	18.1343
24.4001	0.999654	0	7.88502	0	0	0	0	0	0
1.28287	0	0	0	0	0	0	0	0	0
0	0.0844241	0	0	0	0	0	0	0	0
4.1298	0	0	0	0	0	0	0	0	0
27.8166	0.737628	0	0	0	0	12.721	2.3742	0	0
0	0	0	0	0	0	0	0	0	0
0	0	0	10.1685	0	0.542964	0.242182	0	3.41093	0
0	0	0	0.297908	0	0	0	0	0	0
2.95846	0	0	0	0	0	0	0	0	0
2.8031	0	0.248896	0	0	0	0	9.56484	0	0
0	0.679951	0	0	0	0	0	0	0	2.65708
0	0	0	1.49279	0	0	0	0	0	0
0	389.19	0	0	0	0	0	0	0	0
0	0	0	0	0	0	0	0	0	0
0	0	29.6821	6.46548	0	0	7.96833	3.92486	0	17.2393
0	0	0	0	0	0	0	0	0.335494	0
0	0	0	0	0	0	0	0	0	0
0	0	0	0	0	0	0	0	0	0
0	0	0	0	0	0	0	0	0	0
0	0	0	0	0	0	0	0	0	0
0	0	0	0	0	0	0	0	0	0
0.238541	0	0	0	0	0	0	0	0	0
0	0	0	0	0	0	0	0	0	0
0	0	0	0	0	14.9212	0	0	82.9657	0
1.52331	0	0	0	0.334601	0	0	0	0	0
0	0	0	0	0	0	0	0	0	0
0	0	0	0	0	0	5.13876	0	0	0
7.82704	0	0	0	0	0	0	0	0	0
0	0	0	0	0	0	0	0	0	0
0	13.3791	0	0	0	0	0	0	0	0
0	0	0	0	0	0	0	0	0	0
0.760297	0	0	0	0	0	0.500913	0	0	0
0	0	0	0	0	0	0	0	0	0
0	0	0	0	0	0	0	0	0	0
0	0	0	0.565638	0	0	0	0	0	0
0	0	0	0	0	0	0	0	0	0
0	0	0	3.67871	0	0	0	0	0	0
0.455233	0	0	0	0	0	0	0	0	0
0	0	0	0	0	0	0	0	0	0
7.32634	0	0	13.9904	0	0	0	0	0	0
0.208181	0	0	0	0	0	0	0	0	0
0	0.713597	0	0	5.1627	0	0	0	0	0
0	16.7876	30.3874	13.0459	0	0	0	0	0	0
0	5.835	0	0	0	0	0	0	0	0
2.89645	0	0	0	0	0	0	0	0	0
0	0	0	0	0	0	0	0	0	0
0	0	0	0.370091	0	0	0	0	0	0
0	6.90439	0	0	0	0	0	0	0	0
0	0	0	0	0	0	0	0	0	0
0	0	0	0	0	0	0	0	0	0
0	0	0	0	0	0	37.7675	0	0	0
0	0	0	0	0	0	0	0	0	0
1.08473	0	0	0	0	0	0	0	0	0
0	0	0	0	0	0	0	3.45733	0	0
0	0	0	0	0	0	0.458159	0	0	0
69.6654	0	0	0	0	0	0	0	0	0
0	0.276069	0	0	0	0	0	0	0	0
0	0	0	0	0	0	0	0	6.83028	0
0	0	0	0	0	0	0	0	0	0
3.48802	0	0	0	0	0	0	0	0	0
0	0	0	0.538198	0	0	0	0	0	0
0	0	0	0	0	0.190454	0	0	0	0
0	0	0	0.295004	0	0	0	33.4095	0	0
0	0	0	0	0	0	2.73376	0	0	0
0.174509	0	0	0	0	0	0	0	0	0
0	0	0	0	0	0	0	0	0	0
0	0	0	0	0	0	0	0	0	0
0.585075	0	0	0	0	0	0	0	0	0
103.995	0	0	0	0	0	0	0	0	0
0	0	0	0	0	0	0	0	0	0
0	0	0	0	0	0	0	0	0	0
0	0	0	0	0	0	0	0	0	0
0	0	0	3.94625	0	0	0	0	0	0
0	0	0	0	0	0	0	0	0	0
0	0	0	0	0	0	0	0	0	0
0	0	0	0	0	0	0	0	0	0
0	0	0	0	0	0	0	0	0	0
3.00266	0	0	0	0	0	0	0	0	0
0.654786	0	0	1.47439	0	0.312798	0	0	0	0
2.42006	0	0	0	0	0	0	0	0	0
0	0	0	27.2288	0	0.950642	0	0	0	0
0	8.2335	0	0	0	0	0	0	0	0
4.49513	0	0	0	0	0	0	0	0	0
8.95448	3.45954	0	2.6354	0	0	0.292533	0	0	0
0.132091	0	0	0	0	0	0	0	0	0
0	2.32197	0	0	0	0	0	0	0	0
0	0	0	0	0	0	0	0	0	0
0	0	0	0	0	0	0	0	0	0
0	0	0	0	0	0	0	0	0	0
0.475318	0	0	0	0	0	0	0	0	0
0	0	0	0	0	0	0	0	0	0
3.40567	0	0	0	0	0	0	0	0	0
5.37453	0	0	0	0	0	67.917	0	0	0
0	0	0	0	0	0	0	0	0	0
0.338851	0	0.622005	2.06255	0	0	0	0	0	0
0	0	0	0	0	0	0	0	0	0
0	0	0	0	0	0	0	0	0	0
0.897585	0	0	0	0	0	0	0.578546	0	0
20.6586	0	12.2759	8.1057	0	0	1.00542	0	0	0
0	0	0	0	0	0	0	0	0	0
0	0	0	0	0	0	0	0	0	0
0	0	0	0	0	0	0	0	0	0
0	0	0	0	0	0	0	0	0	0
0.180885	0	0	0	0	0	0	0	0	0
0	0	0	0	0	0	0	0	0	0
0	0	0	0	0	0	0	0	0	0
0	0	0	0	0	0	0	0	0	0
0	0	0	0	0	0	0	0	0	0
8.78845	0	0	0	0	0	0	0	0	0
0	0	0	0	0	0	0	0	0	0
0	0	0	0	0	0	0	0	0	0
0	0	0	0	0	0	0	0	0	0
0	0	0	0	0	0	0	0	0	0
0	0	0	0	0	0	0	0	0	0
0	0	0	0	0	0	0	0	0	0
0	0	0	6.66255	0	0	0	0	0	0
0	0	0	0	0	0	0	0	0	0
0	0	0	0	0	0	0	0	0	0
0	0	0	0	0	0	0	0	0	0
0	0	0	0	0	0	0	0	0	0
0	0	0	0	0	0	0	0	0	0
0	0	0	0	0	0	0	0	0	0
0	4.05629	0	0	0	0	0	0	0	0
0	0	0	0	0	0	0	0	0	0
0	0	0	0	0	0	0	0	0	0
0.743635	0	0	0	0	0	0	0	0	0
0	0	0	0	0	0	0	0	0	0
0.210659	0	0	0	0	0	0	0	0	0
0	0	0	0	0	0	0	0	0	0
0	0	0	0	0	0	0	0	0	0
0	0	0	0	0	0	0	0	0	0
0	0	0	0	0	0	0	0	0	0
0.146981	0	0	0	0	0	0	0	0	0
0.614144	0.204218	0	0	0	0	1.48776	0	0	0
0	0	0	0	0	0	0	0	0	0
2.339	0	0	0	0	0	0	0	0	0
0	0	0	4.72214	0	0	0	0	0	0
0	0	0	0	0	0	0	0	0	0
0	0	0	0	0	0	0	0	0	0
0	0	0	0	0	0	0	0	0	0
0	0	0	0	0	0	0	0	0	0
0	0	0	0	0	0	0	0	0	0
0	0	0	0	0	0	0	0	0	0
0	0	0	0	0	0	0	0	0	0
0	0	0	0	0	0	0	0	0	0
0	0	0	0	0	0	0	0	35.2256	0
0	0	0	0	0	0	0	0	0	0
0	0	0	0	0	0	0	0	0	0
0.550224	0	0	0	0	0	0	0	0	0
0	0	0	0	0	0	0	0	0	0
0	0	0	0	0	0	0	0	0	0
0	0	0	0	0	0	0	0	0	0
0	0	0	0	0	0	0	0	0	0
0	0	0	0	0	0	0	0	0	0
0	0	0	0	0	0	0	0	0	0
0	0	0	0	0	0	0	0	0	0
0	0	0	0	0	0	0	0	0	0
0	0	0	0	0	0	0	0	0	0
0	0	0	0	0	0	0	0	0	0
0	0	0	0	0	0	0	0	0	0
0	0	0	0	0	0	0	0	0	0
0	0	0	0	0	0	0	0	0	0
0	0	0	0	0	0	0	0	0	0
0	0	0	0	0	0	0	0	0	0
0	0	0	0	0	0	0	0	0	0
0	0	0	0	0	0	0	0	0	0
0.106453	0	0	0	0	0	0	0	0	0
0	0	0	0	0	0	0	0	0	0
0	0	0	0	0	0	0	0	0	0
0	15.6132	0	0	0	0	0	0	0	0
0	0	0	0	0	0	0	0	0	0
0	0	0	0	0	0	0	0	0	0
0	0	0	0	0	0	0	0	0	0
0	0	0	0	0	0	0	0	0	0
0	0	0	0	0	0	0	0	0	0
0	0	0	0	0	2.37359	0	0	0	0
0	0	0	0	0	0	0	0	0	0
0	0	0	0	0	0	0	0	0	0
0	0	0	0	23.1416	0	0	0	0	0
0	0	0	0	0	0	0	0	0	2.44107
0	0	0	0	0	0	0	0	0	0
0	0	0	0	0	0	0	0	0	0
0	1.47109	0	0	0	0	0	0	0	0
0	0	0	0	0	0	0	0	0	0
0	0	0	0	0	0	0	21.4091	0	0
0	0	0	0	0	0	0	0	0	0
0	0	0	0	0	0	0	0	0	0
0	0	0	0	0	0	0	0	0	0
0	0	0	0	0	0	0	0	0	0
0	0	0	0	0	0	0	0	0	0
0	0	0	0	0	0	0	0	0	0
0	0	0	0	0	0	0	0	0	0
0	0	0	0	0	0	0	0	0	0
0	0	0	0	0	0	0	0	0	0
0	0	0	0	0	0	0	0	0	0
0	0	0	0	0	0	0	0	0	0
52129.1	337140	620137	404758	79655.2	319508	19521.4	1227.57	4250.21	108102
11710.8	5474.01	1196.68	111.432	1331.54	4941.92	4858.78	0	4261.82	41.3987
873.763	1202.39	2071.18	1863.68	409.678	1056.28	35620.5	7816.7	11651.7	4039.74
4693.72	2368.49	2199.51	4364.37	203761	1929.26	8058.17	55.6927	403.922	444.223
103828	4634.38	1018.6	5360.43	6594.42	13938.1	16220.7	12535.9	16455.4	858.944
243.014	9.07031	1195.74	157.614	2434.03	21.0533	19153.1	4479.16	48.3484	20.0897
53.8854	164.122	0.339774	7883.87	116.486	6349.63	430.084	513.647	282.883	26.3914
4177.31	19033	40899.1	63985.3	39586.1	7886.54	111918	10.9827	2738.13	145.551
256.373	2742.07	179.446	1479.24	226.937	469.153	3530.7	241759	137.268	7.31893
374.064	475.558	627.249	278.134	341.768	4138.27	10162.2	45611.9	7238.46	39.369
23.9679	101.75	2872.8	107.239	162.17	0	2716.58	12.7056	138.357	2118.15
5866.05	109.299	4.65901	34121.7	0	244723	5.36458	0	0	0
311.278	14.4722	0	220.008	46.8214	189.075	12.0446	5632.57	11663.9	124201
68.0275	3954.27	1800.96	6873.59	1986.19	3607.47	13903.8	23.1868	1283.22	157.823
39.7415	2.95352	61.1696	6.28547	0	0	203.31	0.29885	0	0
10.3392	56.6698	2999.83	328.452	1.8309	31.0968	37.99	5192.56	7.75852	70.5337
4.21917	4.00821	16.385	415.204	22.6594	59.1926	3833	136.559	59.3632	141.075
2086.61	0.193067	0	16.6331	872.845	0	36.7065	0	0	0
181647	139.791	46.6823	134.039	0	196.019	43.8442	47.5441	10.0957	0
174.05	5.28085	0	0.0675064	0	0	0	17.8619	213.694	11.3846
0.282142	0.51268	0	0	0	0	0	0	0	0
25.4615	60.0645	0.450932	5312.23	88187	4915.67	372.496	12611.7	25.7027	1193.29
6245.33	407.279	179.377	774.714	2628.82	1939	1618.93	26.6249	343.89	1.26255
416.968	4209.08	4439.71	8607.04	3833.71	6168.42	4630.5	1.83577	5.71954	19.1373
3165.48	8047.98	5731.22	8202.97	480.25	211.228	168.18	0	3.58291	4.16237
3.23537	25.9047	0	0.90552	0	0	0	0	0	0
0	0	0	0	47.2205	0	0	0	0	0
44083.4	93.1582	18.6295	30.2583	17.4871	274.549	990.042	251.465	21.9905	0.785044
613.55	5014.97	6681.98	6410.29	2812.12	4226.18	14308.7	40.9235	501.318	420.842
29.0153	2420.42	1301.47	2056.13	1165.74	2236.76	190.951	18.679	5295.29	5.46281
165.359	25.0454	0	28.5426	0	34.6267	0	0	256.73	0
159627	1004.17	0.23137	75.8216	0	0	258.967	0	1.11039	8748.66
466.083	4.21022	12.163	129.167	0	6.72512	0	0	0	0
3.29249	171.905	225.926	1835.17	10240.5	1165.76	2871.11	1.98176	4.43353	2.02567
1630.71	950.678	318.984	249.408	34.755	1134.46	0.673851	0	2.12313	0.138697
0	0	0	0	0	0	0	0	0	0
20.73	15596.8	0	0	30.7465	0.418605	0	0	0	4657.61
0	5986.55	0	1762.78	0	18.2828	0	0	0	0
21.642	0	0	0	0	0	0	0	0	0
804.169	108.936	782.221	658.813	848.635	164.647	2726.02	1799.71	0.720081	0
0	0	0	0	0	0	0	0	0	0
12.8856	93.6887	84.0436	145.466	18.7105	86.8863	36.9564	0.610599	0	19.9876
861.702	3875.59	14215.7	10315.6	530.969	4998.76	9004.72	2.72916	2307.32	1888.81
3065.07	259.522	2.97161	516.822	394.576	255.71	1989	1033.96	79.1163	0.176234
0	0	0	0.11714	0	0	0	0	0	0
10.8302	8.71506	0	89.2485	0	0	0	1203.26	0	0
0	0	0	0	0	0	0	0	0	0
219.912	117.724	29.7755	174.783	281.246	423.215	9321.22	742.509	1593.33	3.57817
138.312	4.60168	5.7015	25.797	31.304	26.0577	196.731	1187.34	194.919	10.2712
621.333	19.2322	17.5988	140.482	237.637	46.3708	23.3553	7.12915	49.7502	0
0	0	0	2.17253	0	0	0	0	0.814359	0
61.3568	0.325159	0	11.4666	0	0	0.921214	0	0	0
22496.5	3994.79	1.62868	0	1.92952	6.90959	2.42472	0	0	0
70.9585	0.602632	48.869	5.12001	117.658	0	1199.26	0	11.5359	31.8132
10.7975	177.713	0	59.4321	64.8929	14.0768	325.472	25.1378	32.3438	0
3937.38	754.987	3.31349	1764.97	2.2601	2047.71	475.135	0	1065.73	0.697788
174.45	946.953	45.4342	1130.67	70.4761	30.1437	29.8555	0	0.90648	0
8.44443	5.01775	0	133.052	0	11.2263	3.98366	31123.6	94.9675	15188.5
910.831	11.9568	0	251.951	8.19247	72.7799	0.362971	239.272	0	26.11
0.453352	15.1039	25.7022	2.04714	0	0	50.0781	36013.3	22.191	0
744.813	2430.16	1299.98	1153.7	16.8168	263.051	153.161	0	3.34801	0
1673.57	92.1219	2.92598	350.778	1.69434	6.46311	13.913	65.1567	0	0
65.1459	0.934555	0	6.75342	0	2.81387	0	0	124.362	0
57.1841	148.118	190.442	175.205	0.238385	71.0331	7.12597	0	0	0
0	0	0	0	0	0	0	0	0	0
9475.33	2245.69	0.880188	0.955612	0	0.232538	11.1683	0	0	0
148.528	293.789	437.926	311.746	131.771	311.262	411.555	0	3.30534	3.51038
0.216565	0	0	19.4418	0.16142	18.7399	28.4162	18.5872	42.1133	0
428.575	106.47	14.9908	71.7105	14.2253	142.522	194.408	353.325	119.885	14.5112
624.426	334.521	16.3129	161.914	63.146	390.559	244.92	0	478.974	0
196.401	182.93	17.5088	68.6831	24.1228	394.791	704.901	0	0	0
60.7941	176.856	231.863	144.04	58.2444	70.3821	885.978	0	4692.98	8284.7
471.989	3205.11	2169.78	2552.99	1541.97	259.759	142.758	0	509.37	1.09886
74.0386	137.172	68.4754	236.262	14.2943	75.3049	740.538	0	0	14.9018
363.935	61.2133	53.2248	112.6	0	31.265	0	53.5081	0	0
1.26686	0	0	34.7824	1480.14	0	106.353	0.54615	0	0
0.215157	37.3766	0	0	0	0	0	0	0	0
0	0	0	0	0	43.1452	0	0	0	0
8.5658	0	0	0	0	0	0	0	0	0
64.4067	249.524	501.891	364.51	43.2855	122.211	1018.69	0.918922	7.41367	7.68134
0	0	0	0.326223	0	0	0	0	0	0
199.73	1.39025	0	0	0	0	0	0	0	0
3562.67	641.748	2.65336	1893.38	9.97721	617.206	314.29	0	380.273	7.3758
0.440781	1.39484	0	0	111.443	0	300.007	0	0	0
10.8569	37.9312	1.16513	11.1755	0	0	0	0	0	0
5.19376	0	0	0.772031	0	0	0	0	0.462147	17.8992
34.3692	1.1484	3.87251	82.424	1586.7	162.113	32.6625	42.9176	0	4.86693
32.3405	0	0	2.36174	1.95224	0	77.8457	0	56.7076	0
0	0.262858	0	16.983	0	0	0.484406	188.053	0	0
0	0	80.1182	0	0	0	0	0	0	0
0	176	320.86	199.343	15.3908	30.8862	1042.59	0	26.9083	0
0	0	0	5.0412	0	0	2.15333	0	0	0.133529
0	0	0	0	0	0	0	2033.56	0	0
1213.25	16.3619	0.499475	104.65	32.2739	44.4467	51.4742	1094.35	0	0
0	0	0	9.58098	0	0	0.101461	0	0	0
374.067	119.669	3.79129	121.177	0	6.50409	32.904	0	0	0
180.902	802.047	1928.13	1725.29	80.2087	1233.16	1904.11	30.1373	30.5546	265.157
36.9346	90.4435	123.62	126.253	25.2319	126.8	90.1769	0	0.459389	0
0	0	0	0	585.438	0	0	161.038	0	0
0.235726	722.002	0	0.497889	0.486663	0	0	0	0	0
145.224	571.49	1041.18	1014.9	554.728	560.215	463.979	68.9111	130.117	0
0	0	0	0	0	0	0	0	94.4626	2187.94
57.9437	0	0.268909	0	207.626	0	0	0	0	0.148545
0.371798	1.95316	7.32063	0.465664	0	0	7.69322	1935.19	0	0
36.7038	163.166	33.0644	321.615	1.50621	300.289	483.975	11.4289	0.525709	300.717
923.598	9.17	0.207747	29.539	74.898	51.7267	19.7421	1437.53	29.9483	3.83156
335.164	22.1335	0	31.3555	0	15.2461	0	0	0	1.65747
0	0	0	0	0	246.111	0	0	0	10424.1
8.73702	0.319122	0	0	0	0	0	0	36.2491	0
0	0	0	101.868	3.36331	0	9.4946	2.89595	0	0
2.19036	0.192828	4.38979	183.632	8.09149	612.746	0	161.116	0	3.89298
10.425	123.41	123.528	184.008	3.87857	18.2987	190.711	41.4793	0	0
53.3134	364.841	471.754	302.934	2.83389	103.463	444.232	3680.51	529.553	58.0384
156.972	4.58805	47.8304	27.0016	12.5147	359.351	92.7989	0	0	18.8931
0	0.384572	8.41067	10.2812	0.176656	0.157554	296.436	14.5653	0	4.13961
132.263	12.6857	0	0.310337	2.07678	68.7907	19.8238	0	0	0
3.0954	0	0	0.251999	0	0	0	0	0	124217
93.2409	712.272	1994.34	1700.99	1134.21	283.796	571.271	1.26907	89.4838	0
62.6409	2124.63	2454.08	4381.12	64.6702	339.762	52.8331	0.51222	0	1.31693
0	29.5162	0	0	0	140.608	0	0	0	0
17.4484	12.1788	0	23.7251	10.2869	74.786	40.0594	25202.7	0.401339	0.199247
46.3615	94.9747	73.6904	268.08	44.4395	710.967	405.447	8.25326	21.8766	0
0	0	0	0	0	0	0	0	6.88183	21.8635
4737.24	0	0	7.18657	273.553	1925.27	0	0	1.53076	0
4.77497	21.8382	1.06027	1.25725	0	0.410326	2243.2	0	0	17.3152
146.625	17.4262	1.33161	40.6751	0	0	39.839	6.35751	0	0
11.9637	0	16.5576	76.5944	21.825	119.469	74.4726	0	0	0
34.8178	21.3397	0	7.56333	10.3446	2.96107	0	40.5104	0	0
28.5719	7.77653	0.304507	92.1148	176.608	107.557	11.7518	50183.6	0	0
235.811	878.229	438.713	616.817	257.86	690.828	489.028	0.252026	34.0871	18.2722
4229.95	63.3285	0	0	3067.56	13.9923	0	0	0	0
0.190012	0.373943	0	0	0	0	0	0	0	3.90589
18.4336	0.136438	0	0	0	0	22.1702	0	0	1.95898
15.5323	224.886	45.4997	67.7114	37.703	67.0696	228.283	0	3.6201	0
0	0	0	0	0	0	0	0	0	0
659.814	149.656	0	409.124	0	15.7093	17.4393	0	70.3058	1.20334
0	0	0.432489	0.47727	0	0	0	0	0	0
0	0	0	0	0	0	0	0	0	0
495.459	0	0	3.38197	0	0	2.23437	0	0	0
23.9923	8.12053	54.8416	70.9978	0.16863	141.248	545.113	10.034	0	0
8.39179	1.09865	0	5.25029	0	0	0	0	0	13.6406
6.80825	112.497	104.401	100.397	31.2257	3.26999	18.4173	0	0	0
0	0	0	0	0	0	0	0	0	0
0	167.257	0	0.555317	0	0	0	0.23519	0	0
131.253	105.339	89.5834	9.14713	0	0	0.636587	3.13879	0	5.0589
8.97556	16.1676	24.1603	0.726518	0	85.865	47.4324	0	711.684	17.3874
95.7424	0	0	750.244	19.8605	5.22891	0.991933	0	0	0
13.0367	393.778	186.508	238.109	28.8531	131.826	411.686	0	0.380775	0.260283
0	0	0	0	0	0	0	0	0	0
0	0	0	0	0	0	0	0	0	0
67.9966	54.4477	0	0.976687	0	162.951	137.729	0	0	3958.83
77.8041	22.0559	0	175.192	0.918527	0.555456	0	0	0	0
0	0	0	0	0	0	0	0	0	0
0	0	0	0	0.409151	0	0	0	0	0
13.5722	50.4551	264.415	12.0379	1155.75	24.7066	0	0	0	0
1.68155	101.902	92.4695	106.597	45.4035	51.0482	54.8482	0	0	0
2.76039	0.0696677	0	43.205	2.32666	0	316.319	0	2141.65	0
28.931	445.719	0.0828431	11.2204	0	2.17378	1905.83	0	0	0
0	0	0	0	0	0	0	0	23.1015	0
1.50271	4.59022	0	0.241007	0	0	0	0	0	0
0.0828452	0	0	0.470861	2.12462	0	0	12.5748	0	0
40.3043	361.533	220.083	1015.2	92.7966	231.911	570.537	0	2566.87	0
129.049	512.547	342.498	1786.92	924.527	346.166	1131.03	0	0	0
0	0	0.341232	0	0	0	0	0	0	0
27.1541	191.948	35.7899	187.966	0.371741	0	16.9409	1.93782	0	0
0	0	0	0	0	0	0	0	0	0
0.636191	0.0783626	0	300.587	0	67.1841	0	1.89152	12.9979	0
0	0	0	0	40.654	0	0	0	0	0
0	87.7994	0	0	0	0	0	0	0	0
173.31	339.908	3108.65	501.49	216.694	390.074	136.75	0	0	0
214.569	1060.97	770.908	508.394	71.7118	357.019	2508.02	0.26887	35.6211	80.4973
188.675	0.428283	175.719	1.5456	0	0	51.2903	50.5403	2174.74	0
57.5664	0	19.7171	3.6329	0.188407	0.558224	20.9783	0	291.995	0
34.2401	1136.97	1965.27	1588.03	19.1355	440.775	155.098	0.95787	0	0
0.419035	1.12281	23.7985	0	0	0	0	0	0	13.6332
0	0	0	0	0	0	0	0	0	0
3.19837	0	0	0.680395	8.98648	32.6655	123.084	0	164.37	0
22.8792	4.31272	30.734	4.42528	0	0.258528	1.85636	2.0565	4.36657	0
95.4158	0	0	0	0	0	0	1.65187	0	0
0	0	0	0	0	0	0	2.02806	0	0
10.3901	0.907871	9.57337	8.54244	0	0	0	0	0	2.40719
70.3109	79.0959	473.128	335.327	14.0981	5.06815	547.892	0	0	0
0	0	0	0	0	0	0	0	51925.9	0
0.394833	74.6034	625.138	138.663	206.227	5834.37	32.9045	0	0	0
26.7586	3.25213	0	3.64665	0.452716	60.3852	0	1633.99	2.20296	1.69956
0	0	0	133.831	0	0	0	0	0	0
5.14454	9.37288	0	0	0	0	0	0.280445	0	0
2.07966	0	0	0	0	0	0	0	0	0
0	0	0	25.5933	0	0	0.644669	0	0	0.094022
223.853	62.7869	0	52.5439	0	23.3986	1.19641	3.48498	0	0
0	0	2.05162	2.05844	0	0	2.93068	0	0	0
0	0	0	2.61011	0	0	0	1132	1.9189	0
3.24619	16.747	0	0	836.189	0	0	0	0	0
57.1064	0	0	0	0	0.539129	25.6144	0	0	0
0	0	0	0	0	0	0	0	0	11.5326
0	0	0	0	0	0	0	0	0	0
0	0	0	0	0	0	0	3.88145	0	0
2.35886	196.395	105.11	77.2141	9.11152	96.9379	215.625	0	0	0
0.330081	127.305	83.4196	111.205	1.24217	30.0257	79.3345	0	4.22718	0
0	0	0	0	0	0.361796	0	0	0	0
19.1262	0	0	9.42353	32.8995	0	0	0	0	0
2.82139	368.245	981.581	1034.09	5.34817	16.141	337.785	0	4920.66	0
0	53.359	0	2.23729	0	0.304992	0	0	0	0
2.97179	2.63488	0	0	0	0	0	0	0	0.842396
3425.3	0	8.76047	21.7443	0	3.16968	8.60794	0	0.969729	0
840.738	0	0	35.6901	62.0971	39.7032	0	0	0	0
1.59519	0.712996	0	0	0	0	27.702	3755.13	0	23.642
0	0	0	0	0	0	0	0	0	0
37.5157	0	0.18639	10.1941	0	0	0	0	0	0
201.696	7.86273	0.152903	35.3728	0	37.0229	0	139.918	0	145.147
639.33	12.4597	0	2.85064	0.60398	12.0768	12.017	0	0	13.3163
36.4661	7.16301	5.15038	61.1212	12.9824	6.60459	119.334	44.9752	269.099	0
0	0	0	0	23.3587	0	72.7197	0	0	0
0.0886025	0	0	0	0	0	0	0	0	0
5.43302	8.224	0	4.80509	0	98.0792	72.0119	0	2170.5	18.3316
0.534431	23.7541	26.2444	10.6535	0	0	1.06309	0	0	0
55.4618	0	0	0	0	0	0	0	0	8.04613
2.80317	152.345	20.4803	90.8172	0	65.7928	60.7147	5.52382	0	0
3.28731	0	0.166167	51.7861	0	0.336036	0	0.274122	17.8735	0
91.4864	2.66519	0	0	0	0	0	40.1282	0	0
103.438	58.4615	27.205	0	0	0	83.0442	0	0	0.117899
0	0	0	0	0	0	0	0	0	0
20.43	189.49	9.7918	57.1979	10.3562	21.8528	1.05814	0	0	0
0	0	0	0	0	0	0	0	0	0
38.3663	0	2.28364	0.522476	0	0	3.02427	0	1.50128	0
0	29.7978	0	0	0	0	0	0	0	12.7966
5.33041	0	0.178301	59.394	8.52169	147.778	0	0	11.6277	0
1683.34	0	0	0	0	0	0	0	0	0
11.2285	215.64	186.445	302.434	57.3376	164.527	312.1	0	87.9717	4.70177
0	6.94181	0	0	0	17.4286	30.3105	0	0	0
0	2.22711	0	10.428	0	0	0	0	55.3138	0
0	31.2253	215.82	324.134	0	81.0644	102.393	0	0	1.61918
13.5927	80.0424	68.2494	157.053	2228.9	16.5124	350.184	5.55594	10796.2	0
52.7512	81.3934	104.131	452.298	1153.82	49.6389	40.2947	1.34326	0	0
0	1.18196	0	0.710173	0	0	0	0	0	0
0	0.194277	0	0.319655	0	0	2.61236	12.7445	0	0
4.56806	0	0.462092	80.6448	0	0	0	0	0	0
0	0.114707	0	0	4.45287	0	0	0	0	0
134.685	5.64636	7.28307	38.4757	0	13.8603	4.00318	2601.6	0.891125	11.4786
0	0	0	0	46.4473	0	0	4865.01	0	0
0	0.621594	0	0	0	16.448	0	0	0	0
8.17206	0	0	0.469786	0	0	0.445118	0	0	0
15.5098	141.259	31.4628	152.675	20.1801	23.655	32.9674	0	0	4270.66
0	94.1307	205.371	123.204	2348.65	1.86327	120	0	6.33065	0
1225.77	13.1301	18.0905	1.04373	2.70642	0	0	0	0	0
41.0958	14.6791	38.8975	38.4955	0	11.6053	19.391	0	0	0
3.24562	0	30.7881	10.7898	0	0	33.9501	0	0	3052.76
10.8032	177.146	103.153	254.62	1.77371	109.665	7.8528	0	0	0
11.9876	0	0	0	0.211122	0	0	0	0	0
0	0	0	0	0	0	14.307	0	0	0
145.029	47.7115	0	45.8997	24.3518	0.374217	0.816395	0	8.52715	0
2.37098	2118.08	0	0	0	0	0	0	0	0
16.0425	91.575	50.8147	94.9451	640.889	56.2182	24.8642	0	20.7287	0
12.0088	43.0175	0	0	0	0	0	0	0	0
26.7367	0.737745	0	106.142	0	25.041	18.8505	966.736	0	0.111499
0	0	0	0	0	0	0	0	0	0
0	0	0	0	0	0	1458.75	0	0	0
0	0	0	0	8.55111	0	2.69991	0	0	0
0.142657	18.3818	31.738	1.12942	0	0	783.178	0	0	0
21.7462	7.41525	0	0	0	0	51.4257	822.651	0	0
46.6575	0	0	2.13695	25.3118	0	2.36592	0.329112	3092.51	0
0	0	0	0.408391	0	0	0	0	0	18.2676
422.534	2.80271	0	0.12875	0	0.172271	0	0	3.56757	0
117.524	3.25903	13.9976	15.9815	0	0	316.404	0	0	20.3634
14.7688	62.7401	68.2175	60.6457	3.28367	51.7566	0	0	13.4038	0
7.31834	0	19.5899	22.0772	0	0	6.80188	0	0	0
9.68474	1.85522	0	0	0	5.10289	2.68712	0	0	0
147.25	3.75633	0	0	0	0	0	2.46422	0	521.601
6.20341	7.07789	1.6672	0	0	0	0	0	0	0
0	0	0	0	0	0	0	0	0	0
67.2585	5.1833	0	0.235963	1.5781	2.46497	0	0	11.8475	0
0.266039	9.84535	0	0	0	0	0	0	0	18.5307
0.566043	0	1.55426	0	0	0	0	0	0	0
0.0816672	0.121229	0	4.12712	0	38.7268	0	21.7076	0	0
218.183	12.3695	1.16868	18.4956	0	0	22.7728	0	0	0
0	1894.78	0	0	0	0	0	0	0	0
34.1487	0	0	0	0	0	0	0	0	0
16.3763	6.81684	33.2002	239.761	0	4.14789	433.336	0	30.6107	0
0	0	0	0	0	124.812	0	8167.77	21.0505	0
0	5.43758	0	255.244	0	0	0	0	0	0
0	0	0	3.28071	24.064	0	0	0	0	0
0.130672	7.98856	0	25.0033	3.9809	0.302918	0.126153	2.44635	0	0
34.4499	14.9308	0	55.214	2.26413	193.752	0	0	0	0
315.212	16.697	0	14.4104	0	20.4621	75.2041	0	0	0
0	0	0	0	0	0	0	0	0	0
1.99001	0.377927	0	0.721329	0	0	0.891139	0	0	3.72278
0	0	0	11.2011	0	0	10.9426	0	0	0
0	13.9679	0	11.3699	0	0	0	0	0	0
0	0	0	0	0	0	0	1.14544	0	0
308.14	138.288	964.552	5.30786	0	0	92.4741	0	0	0
0	0	0	0	0	0	0	0	0	0
53.0461	9.76107	7.36484	1.4254	0	0	6.05413	3.13588	0	0
0	0	0	0	0	0	0	0	0	0
8.22752	151.586	82.9615	131.656	0	17.8196	0	28.9095	0	0
0	0	0	0	0	0	0.202923	0	0	0
33.0486	2.83557	0	1.22686	0	0.596861	13.5232	0	0	0
1.4436	0	0	0.47987	0	0	0	0	0	0
66.7487	15.7911	0.127012	4.35698	0	9.25906	202.659	497.054	8.09229	25.1493
150.732	12.8492	4.2233	20.703	1.35146	18.3196	0	94.5926	0	1.12484
0.0636898	59.3291	31.687	39.5632	0	216.15	230.467	0	0	0.419536
1.24466	152.078	89.1965	281.831	11.9005	11.5568	36.0951	0	0	0
2.81328	0.699464	0	0	0	0	0	0	0	0
657.587	29.9661	0	0	0	0	3.1271	0	0	7.11955
0.188368	0	0	0	0	0	0	0.49117	0	0
7.61832	0.155399	0	0	0	0	0	0	0	0
0	0	0	2.11174	0	0	0	0	0	0
151.353	21.8336	15.658	79.2407	22.2048	36.5022	6.33341	402.593	0	0.172912
0	10.5334	21.1555	20.2584	0	42.3533	0	0	0	0
0	2.22326	0	1.68304	0	1.68456	0	0	0	0
0.180495	0.281331	0	0	0	0	0	0	0	0
2.62985	4.54396	0	90.5629	0	0	0	0	68.8382	0
0.254524	1.5221	0	0	3.72037	0.228391	3.50261	13.0049	0	0
0	0	0	0	0	0	0	0	0	88.8865
0.206934	0	0	0	0	0	0	0	0	0
164.707	4.28267	0.302727	25.3321	9.61129	2.50775	0	0	0	15.7063
5.87909	0	4.59238	1.72856	0	0	0	0	0	0
31.5919	0.989371	0	37.6129	0.354636	0.244729	22.2444	18.3194	0	3.98908
3.29624	100.65	48.4682	152.178	0	67.5933	0	0	0.557034	0
6.93466	0	0	0.416026	0.640585	1.38738	5.27213	0	0	0
0	0	0	0	0	0	0	0	0	0
36.0824	22.203	65.3818	2.83185	0	3.57495	30.3339	0	0	0
0	0	0	0	0	0	0	0	0	0
13.3484	51.5333	48.4113	13.8511	1.44581	0	32.1842	0	0	0
0.120095	0	4.28414	0	5.41391	0	194.22	0	0	0
5.00154	0	0	0	0	8.32846	2.93021	0	0	0
19.1151	40.3417	7.95764	38.4984	5.46415	54.9971	0	19.0676	0	0
170.075	66.5315	0	6.97411	0	3.65547	145.455	0	0	0
2.23571	186.705	44.2604	178.868	1.14249	86.6565	41.7568	0	0	0
0	0	0	0	0	0	0	1.16386	0	5.85366
311.403	13.322	0	0.825476	0	0	0	0	0	0
0	0	0	0	8.94585	0	0	0	0	0
0	0	0.264217	0	0	0	0	0	0	0
138.172	0	0.261792	0.568287	45.4155	3.24561	6.59716	0	0	0
2192.28	1.0052	18.4224	2.48334	0	0	0	286.769	52.4353	0
0.982254	18.69	0	39.4719	3.74895	0.159856	0	5696.67	81.9478	182.943
0.353114	44.1656	58.7694	83.1828	12.0617	14.7688	93.7264	0	246.863	2.45877
28.6214	0	0	1.99844	0	0	0	0	0	1.29405
0	0.170008	0	0	0	0	0	0	0	0
0.195417	1243.56	0	15.4365	0	3.03997	0	0	0	0.999425
31.9542	25.8037	58.2835	52.5855	6.38265	271.577	117.961	0	0	0
0	0	0	0	0	0	0	0	0	8.15036
94.7175	0	0	11.1133	0	20.5141	33.8064	12.3991	0	899.499
6.80623	0.443253	0	0.0922488	8815.27	0	0	0	0	2.4825
312.826	8.89567	0	0	0	0	0	0	0	0
0.635137	0	0	0	0	0	0	0	0	0
0	0	0	0.272918	0	0	0	0	0	0
0.439364	0	0	0	0	0	0	0	0	185.949
20.7438	75.4867	68.22	102.558	15.4049	124.43	78.0605	0.238614	0	0
0	0	0	0	0	0	0	0	0	0
0	0	0	0	0	0	0	0	0	0
0	0	0	0	0	0	0	0	0	0
106.787	14.3717	1.33323	0.445197	0	65.0922	24.8144	0	0	0
6.61363	18.8261	14.2633	5.74496	0	0	1.03974	0	0	0
1.18577	1.34823	0	2.34939	0	0.529466	81.7736	0	0	0
44.0491	33.4048	24.7877	79.3141	0	4.06349	63.4999	490.715	0	0
8.36631	2.52728	15.8491	7.82357	4.13913	0	1.37982	0	0	3.63749
28.201	0	5.84955	0.847938	1.04761	0	26.6709	0	0	0
0	0	0	0	0	0	0	0	0	0
0	0	0	28.8488	0	0	0	0	0	0
0	0.815268	0	0	0	0.19412	0	0	0	0
14.3247	5.98285	81.8663	2.04241	0	0	0	0	0	0
13.646	1.69826	0	10.4555	0	6.12544	0	0	0	0
0.324446	84.2333	9.29847	146.195	1.44473	45.6441	37.3238	0	0	10.7606
41.8539	0	0	0	0	0	0	0	0	0
50.1535	0	0	0.205876	7.56768	0	0.50865	4706.87	0	0
0	0	0	0	0	0	0	0	16.9702	0
0	34.7716	0	3.7609	0	0	0	4337.68	6.80813	768.216
132.202	0	0	16.4593	0	0	22.7976	0	0.359274	0.214506
0	0.213837	0	0	0	0	36.179	0	0	0
0	0	0	0	0	0	0	0	13.6399	0
4.08134	28.583	1.11965	4.88266	0	39.7448	0.353321	0	0	0
0	16.4213	0	0	0	0	0	0	0	0
0.0928306	63.8416	66.1203	118.263	0	10.9496	84.4478	0	0	0
94.4722	34.3034	5.18988	20.4962	0	0	10.0369	0	0	0.228901
0	0.548059	0	0	0	0	0	0	0	0
0	0	0	0	0	0	3.29567	0	0	0
0	0	0	0	0	0	0	0.221507	0	0
0	0	0	0	24.2864	0	0.266896	0	0	0
0	94.4073	0	0	0	0	0	0	0	0
51.4434	0.820219	19.8866	0	0	0.303833	0	2.62261	0.278205	1.82988
21.6072	0	0	1.5372	0	0	0.462625	0	0	0
47.9235	7.25154	16.5152	24.2446	0	3.49836	20.2456	0	0	0
0.0353702	0	0	0	0	0	0	0	0	6.09576
0	0	0	0.363334	0	0	0	2.56028	0	9.65559
0	32.7383	55.4242	119.72	0	12.219	81.3981	0	0	0
0	0	0	9.01943	0	0	0	0	0	0
0	0	0	0	0	0	9.78394	0	0	0
20.522	0	0	0	0	0	0	0	0	0
0	1.06894	0	0	0	0	0	0	0	0
0.236545	0	0	0	0	0	0	0	0	1852.83
11.2709	0	0	1.49945	0	0	0	0	0	0
10.4881	32.296	45.0017	31.1065	9.98252	0	90.9136	0	522.315	0
0.113394	0	0	0	0	0	0	0	0	0
0	0	0	0	0	0	0	0	0	0
0	254.398	0	0	0	0	0	0	0	0
0	145.29	0	0	4.20753	81.0725	0.243774	0	0	0
16.0737	7.50847	0.16876	6.20741	9.05141	0	0.269363	0	0	0
0	0	0	0	0	0	0	0	0	0
30.9494	0	0	0	0	0	0	0	0	0
14.2223	0	0	0.41343	0	0	0	0	11.1075	0
18.3098	0	0	0	0	0	0	0	0	0.244167
7.1268	19.6724	30.2836	42.7134	34.3819	3.87513	16.4338	0	0	0
0	0.406429	0	27.593	0	0	0	220.113	0	0
14.4485	0	0	0	0	0	0	0	0	0
11.8057	0	0	0	0	0	0	0	0	0
20.1088	2.68015	0	0.115765	2.0073	2.46082	8.28357	0	0	9.37895
15.3107	4.77073	9.33893	4.40846	0.360791	11.9326	2.39913	0	0	0
0	0	0	42.5056	17.3452	19.3721	2.67904	118.219	56.5311	0
0.547361	0	0	0	0	0	0	0	0	0
0.184371	0	0	0	0	169.392	0	0	0	0
0	63.2572	12.1083	0.310649	0	0	0	0	0	0
0	0	0	0.751881	0	0	0	0.245719	0	0
7.76464	1.46414	0	8.92931	0	0	9.07192	0	0	0
42.9693	31.2092	0	0	0	0	14.0403	0	0	0
0	0	0	0.207553	0	0	0	0	0	0
0.845712	3.73811	347.581	157.761	0	135.804	45.9147	0	0	0
0	0	0	0	0	0	0	0	0	0
2.85299	18.6583	0	4.27283	0	0	28.4275	9.20532	0	0
0	13.543	4.6006	2.73472	0	20.3267	29.1857	0	0	0
0	0	0	0	0	0	0	0	0	0
22.5142	53.9211	63.084	126.63	0	18.8406	41.3895	0	0	0
0	0	0	0	0	0	0	0	0	0
18.9544	0	0	0.136843	0	0	0	5.97236	200.74	0
0	0	0	1.64548	0	0	0	0	0	0.723761
32.7254	21.5328	0	609.698	3.98894	0	17.7867	0	0	0
115.984	7.39135	48.8673	0.363647	0	19.0138	10.4089	0	0	0
0	0	0	0	0	0	0	0	0	0
0	0	0	0	0	0	0	0	0	0
11.0154	95.2145	375.146	95.0016	0	52.1966	5.36863	0	0	0
1.34489	2.617	0	0	0	8.15485	0	303.483	0	2.93431
7.22973	63.6767	60.4276	114.444	33.1357	81.8577	140.936	0	0	0
0	0.469085	0	0	0	0.251861	118.248	0.296228	0.497758	0
2.67366	0	0	0.421064	0	0.489221	0	0	0	0
0	0.393862	0	13.5624	0	32.5539	2.15918	8.09014	1.18592	0
0.43525	0	0	0	0	0	0	80.0426	0.283732	0.218936
391.657	4.32131	3.29618	0	0	0	36.6095	34.1929	0	0
2.05665	0	0	7.21313	0	0	16.7023	0	0	0
0.859112	4.6728	0	1.05993	0	0	0	0	0	0
0	0	0	0	0	0	0	0	0	0
2.08144	0	0.202252	0	0	0	63.1275	2.82256	0	0
14.8451	0	0	0.153186	0	0	31.4394	0	0	0
0	0	0	0	0.153136	0	0	0	0	0
0	0	0	0	0	0	0	0	0	0
0	0	0	0.0673504	0	0	0	0	0	0
0.698231	0.335067	0	9.20159	0	2.43093	0.13289	0	0	0
0	0	0	0	0	0	0	0	0	0
174.521	0	0	0	0	0	0	0	0	0
7.18685	0	0	1.65693	0	0	0	0	0	0
219.059	1.58862	0.270691	0	0	12.2438	73.126	0	0	0
0.308346	83.0139	50.532	57.0457	0	9.21994	201.889	0	19.8477	0
0	0	0	0	0	0	0	0	0	0
63.3627	7.71807	0	75.6705	0	0	0	0	0	0
8.83552	0.108789	0	924.982	0	0	0	420.675	0	0
0	0	0	0	0	0	0	0	0	0
0	0	0	1.56103	0	0	0	0	0	0
0	0	0	0	0	0	0	0	0	0
22.6477	0	0	0	0	0	0	0	0	0
12.5237	0	0	0	0	0	0	0	0	0
0.57662	11.2787	9.67288	16.6498	0	0	0.69204	0	0	0
0	0	0	0	0	0	0	0	0	0
0.221979	0	0	0	0	0	0	0	0	0
2.31387	0	1.23486	4.08606	0	0.44782	5.22541	0	0	0
0	0	0	0	0	0	0	0	0	0
0	0	0	0	0	0	26.1114	0	0	0
0.311749	0	0	0	0	0	0	0	0	0
420.407	2.09298	0	0	0	12.1125	0	0	0	0
0	0	0	0	0	0	0	0	0	0
0	0	0	0	0	0	0	0	0	0
0	0	0	20.2036	0	0	0	233.785	0	0
9.37756	0	0	0	0	0	0	0	0	0
24.6928	1.87082	0	4.78569	0	0	1.93647	0	0	0
1.97708	0	0	0	0	0	0	0	0	0
0	0	0	5.4499	0	0	0	0	0	0
0.0748522	0	0	0	0	0	0	0	0	0
0	2.61519	0	0	0	0	16.9185	0	0	0
0	0	0	0	0	0	0	0	0	0
9.75326	0	0	0	0	0	0	0	0	0
0	0	0	0	0.456995	0	0	58.8333	0	0
0	0	0	7.26932	0	0	0.94345	3.90484	0	637.423
0	0	0	0	0	0	0	0	0	1.04779
0	0	0	0	0	0	0	0	0	4.5088
0.698471	45.9888	161.778	166.914	10.6701	70.4132	6.39019	0	0	0
0.166744	0	0	20.6369	0.46849	0	4.61689	0	0	0
0	2.48673	0	5.06853	0	0	0	8.45319	0	0
43.9445	40.1906	0.49673	13.2275	0	0	0	9.88907	0	0
0	0.551793	0	0	0	0	0	0	0	0
0	0	0	0	0	0	0	0	0	0
0	0	0	0.443971	0	4.0819	0	8.51873	0	0
8.69341	0	0	0	0	0	1.50035	0	0	0
0	0	0	0	0	0	0	0	0	0
0	0	0	0	0	0	0	0	0	0
123.773	19.0196	0	1.49869	0	0	0	0	0	0
0	0	0	0.321796	0	0	0	0	0	1.13776
0	0	0	0	0	0	0	0	0	0
0.477791	0	0	0	0	0	2.41282	0	0	0
0.546419	0	0	0	0	0	0	0	0	0
24.1819	1.13283	24.7088	14.3905	0	0.357657	37.3499	0	0	0
0	0	0	0	0	0	0	0	0	0
0	0	0	0	1.35603	0	0	0	0	0
0	13.0873	0	0.259023	0	0	0.971938	0	0	0
8.71858	0	0	0	0	0	16.824	0	4.99362	0
49.6719	0.933718	0	0	0	4.60535	46.6595	0	0	0
0	0	0	0	15.917	0	0	0	0	0
0	0	0	0	0	0	0	0	0	0
0	0	0	0	0	0	0	0	0	0
0.317511	0	0	0	0	0	0	0	0	0
101.527	1.61992	0	0	0	0	0	0	0	0
17.4702	19.7381	6.48008	21.3898	1514.06	0.794902	0	0	0	0
15.1468	0	0	0	0	0	0	0	0	0
1.25687	25.0905	360.954	30.7671	0	0	0	0	0	0
56.7963	10.9583	0	7.61743	0	0.127196	13.8046	0	0	0
5.78909	0	0.11423	1.06267	0	0	1.985	0	0	0
0	0	0	0	0	0	0	0.515622	0	0
0	0	0	0	0	0	0	0	0	0
0	0	0	3.19565	0	0	0	541.393	0	0
24.3642	0	0	0	0	0	0	172.466	0	0
0	0	0	0	0.467146	0	0	0	0	0
0	3.64852	6.08013	0.897882	0	0	0	0	0	0
108.99	0	0	0	0	0.42827	0	9.39972	0	0
2.22996	2.46173	0	55.3	0	0	0	0	0	0
2.09718	0	0	0	0	0	0	0	0	0
20.0217	0	0	0	0	0	0	0	0	0
0	0	0	0	0	0	0	0	0	0
8.36722	0	0	0	0	0	0	7.94782	0	3.3409
4.76429	0.283024	0	24.0715	0	0	104.722	0	0	0
109.229	4.40029	0.356612	16.8224	0	0	0	0	0	0
42.828	0	0	0	0	0	0	0	0	0
6.22104	14.5259	25.5576	47.6884	0	0	0	0	0.423757	0
0	0	0	0	0	0	0	0	10.5206	0
0	0	0	0	0	0	0	0	0	0
0	0	0	0	0	0	0	0	0	0
0.797649	0.737387	0	0	0	0	0	0	0	0
0	0	0	0	0	0	0	0	0	0
0	0	0	0	0	0	0	0	0	0.636505
0	0	0	10.6136	0	3.32955	0	0.602969	19.2904	0
0	0	0	0	0	0	0	0	0	0
92.9392	10.2193	0	0	0	0	41.7122	0	0	0
0	30.4112	0.279913	11.3251	0	0	0	0	0	0.15125
0	0	0	0	35.5557	0	0	0	81.7449	0
5.916	3.70226	0	95.7047	0	14.8857	0.203145	0	0	0
0	0	0	0	0	0	0	0	0	0
0.764625	0	0.137043	0	0	0.25761	0	0	0	0
11.6294	18.6203	49.2973	13.6826	17.2583	40.1841	138.858	0	0	0
0	2.77772	0	0	0	0	0	0	0	0
6.64912	16.1638	0	0.953931	0	0	65.1993	0	0	0
17.2619	0	0	0	0	0	0.268012	0	0	0
0	0	0	0	0	0	0	0	0	0
0	0	0	0	0	0	0	0	0	0
31.2793	2.5815	2.43832	1.89059	0	8.52168	0.731324	0	0	26.226
0	0	0	0	0	0	0	0	0	0
0	0	0	0	0	0	0	0	0	0
0	0.179788	0	0	0	0	0	0	0	0
0	0	0	0	0	0	0	0	0	0
0	0	0	0	0	0	0	0	0	0
0	33.8973	4.01377	33.9547	0.56068	5.28411	0	0	0	0
0	0	0	0.32928	0	0	0	0	0	0
2.36405	0.15383	0	0	0	0	1.19462	0	0	0
6.85452	0	0.842001	60.9298	0	0	0	0	1.12849	0
0.328671	2.68837	9.10609	38.8357	0	0	0.0994395	0	40.6136	0
0	0	0	0	0	0	0	0	0	0
9.90036	0	0	0	0	0	0	0	0	0
0.309519	0	0	0	0	0	0	0	0	0
6.82841	0	0	0	0	0	0	0	0	0
3.19367	0	17.1364	4.50912	0.274735	0	6.33743	44.7875	0	0
0	0	0	1.39546	0	0	0	0	0	0
2.06062	17.4999	0	0	0	33.249	4.90174	0	0	0
0.455588	0	8.986	0.127523	0	0	0	0	0	0
0	0	0	0	0	1.06631	0	0	0	0
0	6.42105	0	6.39908	0	0.677592	0	0	0	0
16.1488	0.0534879	11.7565	4.63678	0	0	0	0	0	0
0.131257	1.52523	18.4199	7.25069	0	0	0	0	4.22627	0
0	0	0	0	0	0	0	0	0	0
2.33784	0	4.90512	0	0	0	0	0	0	0
0	0.823716	0	0	0	0	0	0	0	0
25.149	0.193915	0	2.52305	0	39.285	30.1579	0	0	0.240106
248.155	0	0	14.5906	0	2.48015	14.2684	17.0863	0	0
4.41575	0.371893	0	0	0.730379	0	0	0	0	0
0.0989406	0	0	0	0	0	0	0	0	0
0.725616	0	0	0	0	0	31.018	0	0	0
21.6444	7.22386	0	0	0	0	0	0	0	0
0	0	0	0	0	0	0	0	0	0
0	0	0	0	0	0	0	0	0	0
0	0	0	0	0	0	0	0	0	0
17.3821	0	0	1.78766	1.15877	7.12278	0	0	0	0
0	0	0	0	0	0	0	0	0	0
1.66346	7.79523	0	17.0643	0	72.9405	35.4077	0	0	0
0	0	0	0	0	0	0	0	0	0
0	75.3571	0	0	0	0	0	0	0	0
4.80988	0.646346	0	0	0	1178.43	0	0	0	0
0	0	0	0	0	0	0	0	0	0
10.1686	0	0	0	0	0	0	0	0	0
14.7505	0	0	0	0	0	6.43509	0	0	0
0	0.519079	0	29.2904	0.287557	0	0	0	0	0
0	0	0	0	0	0	0	0	0	0
0	0	0	0	0	0	0	0	0	0
95.1746	0.273603	0	0	0	0	5.30446	61.624	0	0
0	0	0	0.320116	0	0	0	0	0	0
0.857701	0	0	0	0	3.42753	0	0	0	0
34.6272	0	0	0	0	0.785921	0	0	120.972	0
196.224	13.8382	0	1.01059	0	0	0.504611	0.487225	0	0
46.7127	0.879387	0.255	21.7005	0	1.06216	0	0	4.46515	0
0	3.59938	0	0	0	0	0	0	0	0
0.265691	0	0	0	0	0	0	0	0	0
0	0	0	0	0	0	0	0	0	0
0	0	0	0	4.32086	0	0	0	0	0
0	8.84015	0	0.168912	0	0	0	0	0	0
1.04383	0	0	0.224656	0	0	29.1644	0	0	0
3.79284	0	0	0	0	0	0	0	0	0
0.253933	0	0	0	0	0	0	0	0	0
0	0	0	0	0	0	0	0	0	0
0	0	0	2.35427	0	0	0	0	0	0
322.203	0	0	1.81867	0	22.7999	7.33677	0	0	0
2.90927	0	0	32.7157	0	0	0	0	0	0
7.61986	3.05673	0	1.64547	0	0	0	0	0	0
0	0	0	0	0	0	0	0	0	0
0	0	0	0	0	0	0	0	0	0
0.141481	0	0	0.123555	0	0	0	0	0	0
0	0	0	0	0	0	0	0	0	0
0	31.9914	9.40286	31.1158	0	13.9682	0	0	0	0
0.20106	0	0	0	0	0	4.61912	0	0	0
0.421152	0	0	0	0	0	0	0	0	0
9.30461	0	0	0	0	0	0	9.54759	0	0
1.95369	0	0	0	0	0	0	28.2317	0	0
139.042	25.819	0.655932	14.0997	0	0	0.558477	0	0	0
0	0	0	0.838622	0	16.8409	0	0	0	0
0	0	0	9.5877	0	0.63619	0	0	0	0
0	0	0	0	0	0	0	0	0	0
0	12.4211	2.01603	2.92487	0	0	0	0	0	0
60.8447	2.93819	0	5.02593	0	0	0	0	0	0
2.26592	0	0	48.7595	0	0	0	0	0	0
2.01539	0	0	116.459	0	0	0	0	199.854	0
0	0	0	0	0.297712	0	0	0	0	0
0	0	0	24.1001	0.310001	11.6307	4.24649	0	0	0
0	0	0	0	0	0	0	0.506424	0	0
7.80858	0.762013	3.13988	7.28246	0	29.962	42.182	0	0	0
4.4435	0	0	0	0	0	0	0	0	0
0	7.09335	0	0	0	0	0	0	0	0
0	0	0	0	0	0	0	4.56019	0	0
0	0	0	0	0	0	0	0	0	0
3.87143	0.192709	0	1.72017	0	0	0	0	0	0
0	0	0	0	0	0	0	0	0	19.2488
0	0	0	0	0	1.08838	0	0	0	0
0	0	0	0	0	0	0	0	0	0
0	0	0	0	0	0	0	0	0	0
0	0	0	0	0	0.305674	0	0	0	0
0	0	0	0	0	0	0	0	0	0
0	0	0	0	0	0	0	0.905775	0	0
0	0	0	14.1414	0	0	0	0	0.759383	0
1.8785	20.3989	0.280239	17.4998	14.6016	0	0	0	0	0
83.498	10.7868	0	0	0	0	0	0	0	0
0.122562	0	0	0	0	0	0	0	0	0
0.366035	0	0	13.8326	0	0	0	0.316214	0	0
0	0	0	0	0	0	0	0	0	0
0	0	1.68013	0	0	0	0	0	0	0
0	0	0	0.763793	0	0	0	0	0	0.843135
1.36851	0.741132	0	0	0	0	0.75781	0	0	0
0.353349	0	0	0	0	0	16.6006	0	0	0
0	0	0	0	0	0	0	0	0	0
0	0.797159	0	38.9425	0	12.0741	0	0	0	0
0	0	0	0	0	0	0	0	0	0
0.655464	0	0	0	0	0	0	0	0.506367	0
0	0	0	0	0	0	0	0	0	0
0.94853	0	0	0.779518	0	0	0	0	0	0
0	0	0	1.9662	0	0	0	0	0	0
0	0	0	0	0	0	0	0	0	0
0	0	0	0	0	0	0	0	0	0
0	0	0	0	0	0	0	19.454	0	0
0	0	0	11.0512	0	0	0	0	4.4504	0
10.5904	2.96678	0	0.193353	0	0	0	0	0	0
0	0.0827096	0	0	0	0	0	0	0	0
25.073	0	25.1461	19.6077	0	2.67747	0	0	0	0
4.1074	0	0	0	0	0	0	0	0	0
0	0	0	0	0	0	0	0	0	0
149.059	0	0	0	0	0	0	0	0	0
9.63691	7.17544	0	0	0	0	4.82521	0	0	0
6.22668	0	0	0	0	0	0	0	2.54933	0
1.99506	0	0	0	0	0	0	0	0	0
19.4488	0	0	0	0	0	0	0	0	0
0	0	0	0	0	0	0	0	0	0
0.177441	0	0	0	0.488524	0	0	0	0	0
7.45923	0	0	25.8894	0	3.68882	0	0	0	0
13.5213	9.92031	0	0.122026	0	0	0	0	0	0
2.94241	0	0	0	0	0	0	0	0	0
0	0	0	0	0	0	0	0	0	0.352834
0	0	0	0	0	0	0	0	0	0
4.29412	0	0	1.20349	0	0	0	0	0	0
0	0	0	0	0	0	0	0	0	2.20388
0	0.666143	0	0	0	0	0	0	0	2.64459
9.45781	0	0	0	0	0	0	0	0	0
0	0	0	1.21218	0	0	0	0	0	0
0	0	0	0	0	0	0	0	0	0
0	0	0	0	0	0	0	0	0	0.247856
0	0	0	0	0	0	0	7.26989	0	0
0	0	0	0	0	0	0	0	0	0
0	0	0	1.48772	0	0	0	0	0	0
0	381.286	0	0	0	0	0	0	0	0
6.10799	0	0	0	0	0	0	0	0	0
1.52657	0	0	7.5459	0	0	1.98094	0	0	0
0.319736	0.204296	0	2.33	0	0	0	0	0	0
0	0	0	0	0	0	0	0	0	84.0714
0.50341	10.7984	16.5998	13.5131	0	2.24531	0	0.775291	0	0
0	0	0	0	0	0	0	0	0.332868	0
0	0	29.618	6.44352	0	0	7.99132	3.92458	0	17.1583
0.20188	0	0	0	0	0	0	0	0	0
0	0	0	29.2404	0	0	0.263299	0	0.140332	0
5.78413	0	14.6995	1.41959	0	0	0	0	0	0
0	0	0	0	0	0	0	0	0	0
0.747009	31.4319	0	12.634	0	0	0	0	0	0
0	5.62654	0	0	0	0	0	0	0	0.141775
0	0	0	0	0	0	0	0	0	0
0	0	0	0	0	0	0	0	0	0
0	0	0	0	0	0	0	0	0	0
1.32598	0	0	0.111641	0	0	3.18139	0	0	0
0	0	0	2.08884	0	0.540975	0	0	3.38423	0
0	0	0	0	0	0	0	0	0	0
0	0	0	0	0	0	0	0	0	0
0.499886	0	0	0	0	0	0	0	0	0
0	0	0	0	0	0	0	0	0	0
2.00365	0	0.513715	0	0	0	0.973283	2.57553	0	2.38763
0	0	0	0	0	0	0	0	0	0
24.139	0	52.1943	0.548292	0.266715	0.127881	0.258587	0	0	0
0	0	0	0	0	0	0	0	0	0
0	0	0	0.583265	0	0	0	0	0	0
0.139013	0	0	0	0	0	0	0	0	0
0	0	0	0	0	0	0	0	0	0
0	0	0	0.920634	0	0	0	0	0	0.386309
0	0	0	0	0	0	0	0	0	349.975
0	0	0	0	0	0	0	0	0	0
0	0	0	0	0	0	0	0	0	0
0.239601	0.362957	0	0	0	0	0	0	0	0
0	0	0	0.271243	0	0	3.28308	0	0	0
0	0	0	0	0	0	0	0	0	0
0	0	0	0	0	0	0	0	0	0
0	0	0	0	0	0	0	1.54426	0	0
0	0	0	0	0	0	0	0	0	0
7.91891	0	0	0	0	0	0	2.37403	0	0
0	0	0	0	0	0	3.89342	0	0	0
0	0	0	0	0	0	0	0	0	0
0.762039	0	0	0	0	0	0	0	0	0
0	0	0	0	3.23371	0	0	0	0	0
0	0	0	0	0	0	0	0	0	0
0	0	0	0	0	0	0	0	0	8.66712
5.61729	0	0	0	0	0	0	0	0	0
0	0	0	0	0	0	0	0	0	0
0	0	0	0.451456	0	0	0	0	0	0
0	0	0	0	0	0	0	0	0	0
0.120212	0	0	0	0.864548	0	0	19.0041	0	0
0	0	0	0	0	0	0	0	0	0
0	0	0	0	0	14.8666	0	0	82.3164	0
1.06616	0	0	0	0	0	0	0	0	0
0	0	0	0	0	0	0	0	0	0
1.51505	0	0	0	0.330322	0	0	0	0	0
0	0	0	0	0	0	0	0	0	0
0	0	0	0	0	0	0	0	0	0
0	0	0	0	0	0	0	0	0	0
0	0	0	0	0	0	0	0	0	0
23.8802	0.979353	0	7.85824	0	0	0	0	0	0
0	13.1074	0	0	0	0	0	0	0	0
2.7879	0	0.248359	0	0	0	0	9.56416	0	0
0	0	0	0	0	0	0	0	0	0
0	0	0	0	0	0	0	0	0	0
0	0	0.0872111	0	0	0	0	94.3777	0	0
29.8597	13.9199	0	0	0	0	0	0	0	0
0	0	0	0	0	0	0	0	0	0
0	0	0	0	0	0	0	0	0	0
0	0	0	0	0	0	0	0	0	0
0	0	0	0	0	0	0	0	0	0
0	0	0	0.563717	0	0	0	0	0	0
0	0	0	0	0	0	0	0	0	0
0.501526	0	0	0	0	0	0	0	0	0
4.3703	0	0	9.1558	0	0	0	0	0	0
0	30.6767	0	0	0	0	0	0	0	0
0	0	0	0	0	0	0	0	0	0
0.452764	0	0	0	0	0	0	0	0	0
0	0	0	0	0	0	0	0	0	0
0	0	0	2.79887	0	0	1.08575	0	0	13.9744
0	0	0	0	0	0	0	0	0	0
0	0	0	0	0	0	0	0	0	0
0	0	0	0	0	0	0	0	0	0
0	0	0	0	0	0	0	0	0	0
0	0	0	0	0	0	0	0	0	0
0	0.699106	0	0	5.09668	0	0	0	0	0
14.6419	0	0	0	0	0	0	0	0	0
0	0	0	0	0	0	0	0	0	0
0	0	0	0	0	0	0	0	0	0
0	16.4466	30.3218	13.0016	0	0	0	0	0	0
0.940422	0	0	0	0	0	4.0281	0	0	0
0	0	0	0	0	0	0	0	0	0
0	0	0	0	0	0	0	0	0	0
0	0	0	0	0	0	0	0	0	0
0	0	0	0	0	0	17.9369	0	0	0
0	0	0	0	0	0	0	0	0	0
0	0	0	0	0	0	0	0	0	0
0	0	0	0	0	0	0	0	0	0
1.20153	0	0.211799	0	0	0	0	0	0	0
0	0	0	0	0	0	0	0	0	0
6.10284	0	0	14.5167	0	1.03915	0	0	0	0
0	0	0	0	0	0	0	0	0	0
0	0	0	2.12672	0	0	8.64274	0	0	239.832
11.3949	0	0	0.67795	0	1.07642	0	0	0	0
0	0	0	0	0	0	5.15359	0	0	0
0	0	0	0	0	0	0	0	0	0
0	0	0	0	0	0	0	0	0	0
0	0	0	0	0	0	0	0	0	0
0	0	0	0	0	0	0	0	0	0
0	0	0	0	0	0	0	0	0	0
0	0	0	0	0	0	0	60.1653	0	0
0	0	0	0	0	0	0	0	0	0
0	0	0	0	0	0	0	0	0	0
0	0	0	0	0	0	0	0	0	0
0	0	0	0	0	0	0	0	0	0
0	0	0	0.160819	0	0	0	0	0	0
0	0	0	0	0	0.338113	0	0	0	0
0.756173	0	0	0	0	0	0.502358	0	0	0
0	0	0	0	0	0	0	0	0	0
0	0	0	0	0	0	0	0	0	0
0	0	0	0	0	0	0	0	0	0
12.5349	0	0	0	0	0	0	0	0	0
0	0	0	0	0	0	0	0	0	0
0.108461	9.01704	0	0	0	0	0	0	0	0
0	6.6473	0	0	0	0	0	0	0	0
0	7.65612	0	9.31479	0	0	0.710887	0	0	0
69.2875	0	0	0	0	0	0	0	0	0
0	0	0	0	0	0	0	0	0	0
0.735725	0	0	0	0	0	0	0	0	0
0	0	0	0	0	0	0	0	0	12.0413
0	0	0	0	0	0	0	0	0	0
0.237247	0	0	0	0	0	0	0	0	0
0	0	0	0	0	0	0	0	0	0
0	0	0	0	0	0	0	0	0	0
0	0	0	0	0	0	0	0	0	0
11.1162	0	0	0	0	0	21.2772	0	0	0
0.800475	0	0	0	0	0	0	0	0	0
0.349355	0	0	0	0	0	0	0	0	0
0.338427	0	0	0	0	0	0	0	0	0
0	0	0	0	0	0	0	0	0	0
0	0	0	0	0	0.189756	0	0	0	0
0	0	0	0	0	0	0	0	0	0
0	0	0	0	0	0	0	0	0	0
0	0	0	0	0	0	0	0	0	0
0	0	0	0	0	0	0	0	0	0
0	0	0	0	0	0	0	0	0	0
0	0	0.512102	0	0	0	0	0	0	0
0	0	0	0	1.14835	0	0	0	0	0
4.19941	0	0	0	0	0	1.85321	0	0	0
103.431	0	0	0	0	0	0	0	0	0
0	0	0	0	0	0	0	0	0	0
0	0.119898	0	0	10.8732	0	0	0	0	0
0.844184	0	0	0	0	0	13.7618	0	0	0
0	0	0	0.294002	0	0	0	33.4071	0	0
0	0	0	0	0	0	0	0	0	0
0	0	0	0	0.115719	0	0	0	0	0
1.30717	0	0	0	0	0	0	0	0	0
0	0	0	0	0	0	0	0	6.77682	0
0	0	0	0	0	0	0	0	0	0
0.498237	0	0	0	0	0	0	0	0	0
0	0	0	3.93285	0	0	0	0	0	0
0	0	0	0	0	0	0	0	0	0
0	0	0	0	0	0	0	0.614556	0	0
0	0	0	0	0	0	0	0	0	0
0	0	0	0	0	0	0	0	0	0
0	0	0	0	0	0	0	0	0	0
22.9349	0	0	1.90939	1.36082	0	0	0	0	0
0	0	0	0	0	0	0	0	0	0
0	0	0	0	0	0	0	0	0	0
0	0	0	0	0	0	0	0	0	0
0	0	0	0	0	0	0	0	0	0
0	0	0	0	0	0	0	0	0	0
0	0	0	0	0	0	0	0	0	0
0	0	0	0	0	0	0	0	0	0
0	0	0	0	0	0	0	0	0	0
0	0	0	0	0	0	0	0	0	0
5.08626	0	0	0	17.9692	0	0	0	0	0
2.98637	0	0	0	0	0	0	0	0	0
0	0	0	27.1363	0	0.947159	0	0	0	0
0	0	0	0	0.322033	0	0	0	0	0
0	0	0	0	0	0	0	0	0	0
0.651234	0	0	1.46938	0	0.311652	0	0	0	0
0	8.06629	0	0	0	0	0	0	0	0
0.510109	0	0	8.13668	0	0	0	0	0	0
4.47075	0	0	0	0	0	0	0	0	0
0.342542	0	0	0	0	0	0	0	0	0
8.90591	3.38929	0	2.62645	0	0	0.293377	0	0	0
0	0	0	0	0	0	0	0	0	0
0	0	0	0	0	0	0	0	0	0
0	0	0	0	0	0	0	0	0	0
2.40693	0	0	0	0	0	0	0	0	0
0	0	0	0	0	0	0	3.45709	0	0
0	0	0	0	0	0	0	0	0	0
0	0	0	0	0	0	0	0	0	0
0	0	1.55667	0	0	0	0	0	0	0
0	0	0	0	0	0	0	0	0	0
0	0	0	0	0	0	0	0	0	0
0	0	0	0	0	0	0	0	0	0
0	0	0	7.89336	0	0	0.242881	0	0	0
0	0	0	0	0	0	0	0	0	0
0	0	0	0	0	0	37.8765	0	0	0
0.472739	0	0	0	0	0	0	0	0	0
0	14.0768	0	0	0	0	15.0116	0	0	0
0	0	0	0	0	0	68.9702	0	0	0
0	0	0	0	0	0	0	0	0	0
0	0	0	0	0	0	0	0	0	0
6.6188	0	0	0	0	0	0	0	0	0
3.38719	0	0	0	0	0	0	0	0	0
0	0	0	0	0	0	0	0	0	0
0	0	0	0	0	0	0	0	0	0
0	0	0	0	0	0	0	0	0	0
0.337012	0	0.620662	2.05554	0	0	0	0	0	0
0	0	0	0	0	0	0	0	0	0
0	0	0	0	0	0	0	0	0	0
0	0	0	0	0	0	0	0	0	0
0.892716	0	0	0	0	0	0	0.578506	0	0
0	0	0	0	0	0	0	0	0	0
0	0	0	0	0	0	0	0	0	0
0.343829	0	0	0	0	0	0	0	0	0
0	0.182684	0	2.09006	0	0	2.3374	0	0	0
20.5465	0	12.2494	8.07817	0	0	1.00832	0	0	0
0	0	0	0	0	0	0	0	0	0
0	0	0	0	0	0	0	0	0	0
0	0	0	0	0	0	0	0	0	0
0.173563	0	0	0	0	0	0	0	0	0
0	0	0	0	0	0	0	0	0	0
24.7568	0	0	0	0	0	0	0	0	0
0	0	1.24635	0	0	0	0	0	0	0
0	0	0	0	0	0	0	0	0	0
0	0	0	0	0	0	0	0	0	0
0.0868411	0	0	73.1072	0	0	0	0	0	0
0	0	0	0	0	0	0	0	0	0
0	0	0	0	0	0	0	0	0	0
0	0	0	0	0	0	0	0	0	0
0	0	0	0	0.869632	0	0	0	0	0
0	0	0	0	0	0	0	0	0	0
0.237483	0	0	0	0	0	0	0	0	0
0	0	0	0	0	0	0	0	0	0
0	0	0	0	0	0	0	0	0	0
0	0	0	0.634431	0	0	0	0	0	0
1.06181	0	0	0	0	0	0	0	0	0
0	0	0	17.6188	0	0	0	0	0	0
0	0	0	0	0	0	0	0	0	0
0	0	0	0	0	0	0	0	0	0
0	0	0	0	0	0	0	0	0	0
0.179904	0	0	0	0	0	0	0	0	0
0	0	0	0	0	0	0	0	0	0
0	0	0	0	0	0	0	0	0	0
10.2637	0	0	0	0	0	0	0	0	0
0	0	0	0	0	0	0	0	0	0
1.91128	0	0	0	0	0	0	0	0	0
0	0	0	0	0	0	0	0	0	0
0	0	0	0	0	0	0	0	0	0
0	0	0	0	0	0	0	0	0	0
0	0	0	0	0	0	0	0	0	0
0	0	0	0	0	0	0	0	0	0
0.409866	0	0	0	0	0	0	0	0	0
0	0	0	0	0	0	0	0	0	0
0	0	0	0	0	0	0	0	0	0
0	0	0	0	0	0	0	0	0	0
1.53384	0	0	0	0	0	0	0	0	0
0	0	0	0	0	0	0	0	0	0
0	0	0	0	0	0	0	0	0	0
0	0	0	0	0	0	0	0	0	0
0	0	0	0	0	0	0	0	0	0
0	0	0	0	0	0	0	0	0	0
0	0	0	0	0	0	0	0	0	0
0	0	0	0	0	0	0	0	0	0
0	0	0	0	0	0	0	0	0	0
0	1.84339	0	0	0	0	0	0	0	0
0.307517	0	0	0	0	0	0	0	0	0
0	0	0	0	0	0	0	0	0	0
0	0	0	0	0	0	0	0	0	0
0	0	0	0	0	0	0	0	0	0
0	0	0	0	0	0	0	0	0	0
0	3.97392	0	0	0	0	0	0	0	0
0	0	0	0	0	0	0	0	0	0
1.8026	0	0	3.60421	0	0	0	0	0	0
0	0	0	0	0	0	0	0	0	0
0	0	0	0	0	0	0	0	0	0
0	0	0	0	0	0	0	0	0	0
0.206698	0	0	0	0	0	0	0	0	0
0	0	0	0	0	0	0	0	0	0
0	0	0	0	0	0	0	0	0	0
0	0	0	0	0	0.192748	0	0	0	0
1.24618	0	0	0	0	0	0	0	0	0
0	5.03732	0	0	0	0	0	0	0	0
0	0	0	0	0	0	0	0	0	0
0	0	0	0	0	0	0	0	0	0
0	0	0	0.280406	0	0	0.193937	0	0	0
0.337836	0	0	0	0	0	0	0	0	16.4317
0	0	0	0	0	0	0	0	0	0
0	0	0	0	0	0	0	0	0	0
0	0	0	0	0	0	0	0	0	0
0	0.589842	0	0	0	0	0	0	0	0
0.566277	0	0	0	0	0	0	0	40.4653	0
0	0	0	0	0	0	0	0	0	0
0.209516	0	0	0	0	0	0	0	0	0
0	0	0	0	0	0	0	0	0	0
36.5404	0	0	0	0	0	0	0	0	0
0	0	0	0	0	0	0	0	0	0
0	0	0	0	0	0	0	0	0	0
0.135139	0.099615	0	0	0	0	0	0	0	0
0	0	0	0	0	0	0	0	0	0
0	0	0	0	0	0	0	0	0	0
0	0	0	0	0	0	0	0	0	0
0	0	0	0	0	0	0	0	0	0
0	0	0	0	0	0	0	0	0	0
0	0	0	0	0	0	0	0	0	0
0.610812	0.200071	0	0	0	0	1.49206	0	0	0
0	0.530306	0	0	0	0	0	0	0	0
1.37272	0	0	0	0	0	0	0	0	0
0	0	0	0	0	0	0	0	0	0
0	0	0	0	0	0	0	0	0	0
0	0	0	0	0	0	0	0	0	0
0	0	0	0	0	0	0	0	0	0
0	0	0	0	0	0	0	0	0	0
0	0	0	0	0	0	0	0	0	0
0	0	0	0	0	0	0	0	0	0
2.32631	0	0	0	0	0	0	0	0	0
0	0	0	2.90808	0	0	0	0	0	0
0	0	0	0	0	0	0	0	0	0
0	0	0	4.7061	0	0	0	0	0	0
0	5.25985	0	0	0	0	0	0	0	0
0	0	0	0	0	0	0	0	0	0
0	0	0	0	0	0	0	0	0	0
8.74077	0	0	0	0	0	0	0	0	0
9.24763	0	0	0	0	0	0	0	0	0
0	0	0	0	0	0	0	0	0	0
0	0	0	0	0	0	0	0	0	0
0	0	0	3.39908	0	0	0	0	0	0
0	0	0	0.353565	0	0	0	0	0	0
0	0	0	0	0	0	0	0	0	0
0	0	0	0	0	0	0	0	0	0
0	0	0	0	0	0	0	0	0	0
0	0	0	0	0	0	0	0	0	0
0	0	0	0	0	0	0	0	0	0
0	0	0	0	0	0	0	0	0	0
0	0	0	0	0	0	0	0	0	0
0	0	0	0	0	0	0	0	0	0
0	0	0	0	0	0	0	0	0	0
0	0	0	0	0	0	0	0	0	0
0	0	0	0	0	0	0	0	0	0
0	0	0	0	0	0	0.345899	0	0	0
0	0	0	0	0	0	0	0	0	0
0	0	0	0	0	0	0	0	0	0
0	0	0	0	0	0	0	0	0	0
0	0	0	0	0	0	0	0	0	0
0	0	0	0	0	0	0	0	0	0
0	0	0	0	0	0	0	0	0	0
0.122913	0	0	0	0	0	0	0	0	0
3.4691	0	0	0	0	0	0	0	0	0
0	0	0	0	0	0	0	0	34.9499	0
0	0	0	0	0	0	0	0	0	0
0	0	30.9703	0	0	0	4.96302	0	0	0
0	0	0	0	0	0	0	0	0	0
0	3.37311	0	0	0	0	0	0	0	0
0	0	0	0	0	0	0	0	0	0
0	0	0	0	0	0	0	0	0	0
7.78458	0	0	0	0	0	0	0	0	0
0	0	0	1.24304	0	0	0	0	0	0
0	0	0	0	0	0	0	0	0	0
0	0	0	0	0	0	0	0	0	0
0	0	0	0	0	0	0	0	0	0
0	0	0	0	0	0	0	0	0	0
0	0	0	0	0	0	0	0	0	0
0	9.22364	0	0	0	0	0	0	0	0
0	0	0	0	0	0	0	0	0	0
0	0	0	0	0	0	0	0	0	0
0	0.23002	0	0	0	0	0	0	0	0
0	0	0	0	0	0	0	0	0	0
0	0	0	0	0	0	0	0	0	0
0	0	0	0	0	0	0	0	0	0
0	0	0	0	0	0	0	0	0	0
0	0	0	0	0	0	0	0	0	0
0	0	0	0	0	0	0	0	0	0
0	0	0	0	0	0	0	0	0	0
0	0	0	0	0	0	0	0	0	0
0.547239	0	0	0	0	0	0	0	0	0
0	0	0	0	0	0	0	0	0	0
0	0	0	0	0	0	0	0	0	0
0	0	0	0	0	0	0	0	0	0
0	0	0	0	0	0	0	0	0	0
0	0	0	0	0	0	0	0	0	0
0	0	0	0	0	0	0	0	0	0
0	0	0	0	0	0	0	0	0	0
0	0	0	0	0	0	0	0	0	0
0	0	0	0	0	0	0	0	0	0
0	0	0	0	0	0	0	0	0	0
0	0	0	0	0	0	0	0	0	0
0	0	0	0	0	0	0	0	0	0
0	0	0	0	0	0	0	0	0	0
0	0	0	0	0	0	0	0	0	0
0	0	0	0	0	0	0	0	0	0
0	0	0	0	0	0	0	0	0	0
0	0	0	0.149063	0	0	0	0	0	0.279364
0	0	0	0	0	0	0	13.578	0	0
0	0	0	0	0	0	0	0	0	0
0	0	0	0	0	0	0	0	0	0
0	0	0	0	0	0	0	0	0	2.24562
0	0	0	0	0	0	0	0	0	0
0	0	0	0	0	0	0	0	0	0
55.9154	0	0	0	0	0	0	0	0	0
0	0	0	0	0	0	0	0	0	0
3.76756	0	0	0	0	0	0	0	0	0
0	0	0	0	0	0	0	0	0	0
0.104582	0	0	0	0	0	0	0	0	0
0	0.270462	0	0	0	0	0	0	0	0
0	0	0	0	0	0	0	0	0	0
0	0	0	7.24275	0	0	0	0	0	0
0	2.76719	0	0	0	0	0	0	0	0
0	0	0	6.63992	0	0	0	0	0	0
0	0	0	0	0	0	0	0	0	0
0	0	0	0	0	0	0	0	0	0
0	0	0	0	0	0	0	0	0	0
0	0	0	0	0	0	0	0	0	0
0	0	0	0	0	0	0	0	0	0
0	0	0	0	0	0	0	0	0	0
0	0	0	0	0	0	0	0	0	0
0	0	0	0	0	0	0	0	0	0
0	0	0	0	0	0	0	0	0	0
0	0	0	0	0	0	0	0	0	0
0	0	0	0	0	0	0	0	0	0
0	0	0	0	0	0	0	0	0	0
0	0	0	0	0	0	0	0	0	0
0	0	0	0	0	0	0	0	0	0
0.0681543	0	0	0	0	0	0	0	0	0
0	0	0	0	0	0	0	0	0	0
0	0	0	0	0	0	0	0	0	0
0	0	0	0	0	0	0	0	0	0
0	0	0	0	0	0	0	0	0	0
0	0	0	0	0	0	0	0	0	0
2.31986	0	0	0	0	0	0	0	0	0
0	0	0	0	0	0	0	0	0	0
0.105876	0	0	0	0	0	0	0	0	0
0	0	0	0	0	0	0	0	0	0
3.24349	0	0	0	0	0	0	0	0	0
0	0	0	0	0	0	0	0	0	0
0	0	0	0	0	0	0	0	0	0
0	0	0	0	0	0	0	0	0	0
0	0	0	0	0	0	0	0	0	0
0	0	0	0	0	0	0	0	0	0
0	0	0	0	0	0	0	0	0	0
0	0	0	0	0	0	0	0	0	0
0	0.11688	0	0	0	0	0	0	0	0
0	0	0	0	0	0	0	0	0	0
0	0	0	0	0	0	0	0	0	0
0	0	0	0	0	0	0	0	0	0
0	0	0	0	0	0	0	0	0	0
0	15.2961	0	0	0	0	0	0	0	0
0	0	0	0	0	0	0	0	0	0
0	0	0	0	0	0	0	0	0	0
0	0	0	0	0	0	0	0	0	0
0	0	0	0	0	0	0	0	0	0
0	0	0	0	0	0	0	0	0	0
0	0	0	0	0	0	0	0	0	0
0	0	0	0	0	0	0	0	0	0
0	0	0	0	0	0	0	0	0	0
0	0	0	0	0	0	0	0	0	0
0	0	0	0	0	0	0	0	0	0
0	0	0	0	0	0	0	0	0	0
0	0	0	0	0	0	0	0	0	0
0	0	0	0	0	0	0	0	0	0
0	0	0	0	0	0	0	0	0	0
0	0	0	0	0	0	0	0	0	0
0	0	0	0	0	0	0	0	0	0
0	0	0	0	0	0	0	0	0	0
0	0	0	0	0	0	0	0	0	0
0	0	0	0	0	0	0	0	0	0
0.708465	0	0	0	0	0	0	0	0	0
0	0	0	0	0	0	1.51382	0	0	0
0	0	0	0	0	0	0	0	0	0
0	0	0	0	0	0	0	0	0	0
0	0	0	0	0	0	0	0	0	0
0	0	0	0	0	0	0	0	0	0
0.139129	0	0	0	0	0	0	0	0	0
1.66674	0	0	0	0	0	0	0	0	0
0.27145	0	0	0	0	0	0	0	0	0
0	0	0	0	0	0	0	0	0	2.42959
0	0	0	0	0	0	0	0	0	0
0	0	0	0	0	0	0	0	0	0
0	0	0	0	0	0	0	0	0	0
0	0	0	0	0	0	0	0	0	0
0	0	0	0	0	0	0	0	0	0
0	0	0	0	0	0	0	0	0	0
0	0	0	0	0	0	0	0	0	0
0	0	0	0	0	0	0	0	0	0
0	0	0	0	0	0	0	0	0	0
0	0	0	0	0	0	0	0	0	0
0	0	0	0	0	0	0	0	0	0
0	0	0	0	0	0	0	0	0	0
0	0	0	0	0	0	0	0	0	0
0	0.254651	27.3613	0	0	0	0	0	0	0
0	0	0	0	22.8456	0	0	0	0	0
0	0	0	0	0	0	0	0	0	0
0	0	0	0	0	0	0	0	0	0
0	0	0	0	0	0	0	0	0	0
0	0	0	0	0	0	0	0	0	0
0	0	0	0	0	0	0	0	0	0
0.359463	0	0	0	0	0	0	0	0	0
0	0	0	0.249862	0	0	0	0	0	0
0	0	0	0	0	0	0	0	0	0
0	0	0	0	0	0	0	0	0	0
0	0	0	0	0	0	0	21.4076	0	0
0.823975	0	0	0	0	0	0	0	0	0
0	0	0	0	0	0	0	0	0	0
0	0	0	0	0	0	0	0	0	0
0	0	0	0.758132	0	0	0	0	0	0
0	0	0	0	0	0	0	0	0	0
0.739601	0	0	0	0	0	0	0	0	0
0	0	0	0	0	0	0	0	11.5804	0
0	0	0	0	0	0	0	0	0	0
0	0	0	0	0	0	0	0	0	0
0	0	0	0	0	0	0	0	0	0
0	0	0	0	0	0	0	0	0	0
0	0	0	0	0	0	0	0	0	0
0	0	0	0	0	0	0	1.41248	0	0
0	0	0	0	0	0	0	0	0	0
0	0	0	0	0	0	0	0	0	0
0	0	0	0	0	0	0	0	0	0
0	0	0	0	0	0	0	0	0	0
0	0	0	0	0	0	0	0	0	0
0.637832	0	0	0	0	0	0	0	0	0
0	0	0	0	0	0	0	0	0	0
0	0	0	0	0	0	0	0	0	0
0	0	0	0	0	0	0	0	0	0
0	0	0	0	0	0	0	0	0	0
0	0	0	5.98535	0	0	0	0	0	0
0	0	0	0	0	2.36489	0	0	0	0
0	0	0	0	0	0	0	0	0	0
0	0	0	0	0	0	0	0	0	0
0	0	0	0	0	0	6.54641	0	0	0
0	0	0	0	0	0	0	0	0	0
0	0	0	0	0	0	0	0	0	0
0	0	0	0	0	0	0	0	0	0
0	0	0	0	0	0	0	0	0	0
0	0	0	0	0	0	2.43259	0	0	0
0	0	0	0	0	0	0	0	0	0
0	0	0	0	0	0	0	0	0	0
0	0	0	0	0	0	0	0	0	0
0	0	0	0	0	0	0	0	0	0
0	0	0	0	0	0	0	0	0	0
0	0	0	0	0	0	0	0	0	0
0	0	0	0	0	0	0	0	0	0
0	0	0	0	0	0	0	0	0	0
0	0	0	0	0	0	0	0	0	0
0	0	0	0	0	0	0	0	0	0
0.410689	0	0	0	0	0	0	0	0	0
0	0	0	0	0	0	0	0	0	0
0	0	0	1.84387	0	0	0	0	0	0
0	0	0	0	0	0	0	0	0	0
0	0	0	0	0	0	0	0	0	0
0	0	0	0	0	0	0	0	0	0
0	0	0	0	0	0	0	0	0	0
4.68696	0	0	0	0	0	0	0	0	0
0	0	0	0	0	0	0	0	0	0
0	0	0	0	0	0	0	0	0	0
0	0	0	0	0	0	0	0	0	0
0	0	0	0	0	0	0	0	0	0
0	0	0	0	0	0	0	0	0	0
0	0	0	0	0	0	0	0	0	0
0	0	0	0	0	0	0	0	0	0
0	0	0	0	0	0	0	0	0	0
0	0	0	0	0	0	0	0	0	0
0	0	0	0	0	0	0	0	0	0
0	0	0	0	0	0	0	0	0	0
0	0	0	0	0	0	0	0	0	0
0	0	0	0	0	0	0	0	0	0
0	0	0	0	0	0	0	0	0	0
260768	443942	763811	581778	168311	378702	242947	5435.03	65540.7	142458
370218	27273.7	12386.8	71313.4	252215	314207	131036	372904	52904.9	23086.5
108290	76447.8	1732.59	1045.99	5345.98	6077.86	9044.89	16898.7	5220	1767.03
1255.08	1809.63	943.772	13880.8	859.603	11953.6	25619.7	109985	8453.19	1596.37
411.08	130.238	4291.91	1528.04	2462.42	269.964	19433.9	11113.1	58.3708	130.602
2606.01	207.032	110.009	828.229	159.054	575.03	4328.06	36820.4	14711	150605
6264.61	456.238	97.681	2208.78	11071.9	1354.28	1917.98	16965	3948.56	3902.91
55.4427	40.4743	35.0989	364.927	92.5957	177.437	96.0647	7115.24	52802.3	2247.66
280.147	3167.23	23.7035	5389.03	88217.8	5035.37	474.823	12611.8	25.7019	1201.2
200.359	2.32254	7.72317	2.05483	0	0.194129	0	1.14463	0	0
310.33	10.6483	52.5767	200.207	0	3.11279	72.3704	2.57371	76.4192	136462
8.55254	0	0	0	0	0	0	0	0	0
0.546514	0	0	0	0	0.361812	0	0	0	0.671325
0	0	0	0	0	0	0	0	0	19.337
2.19004	0	0	1.43696	0	0	0	0	0	0
36.5306	7.97832	0	12.1171	0	0.785957	0.70857	3.45464	155.917	47.2497
0	0	0	11.1973	0	0	10.907	0	0	0
0	265.414	0	0	0	0.274867	0	0	0	0
14.2676	0	0	0	0	0	0	0.506065	0	0
50.7515	0	0	0.280309	0	0	17.9626	0	0	20.797
6.5099	5.80225	0	0	0	0	0	0	0	0
42.023	0	35.0984	31.2879	0.274759	0	7.32181	69.4533	0	0
0	3.70324	6.08101	9.33617	0	0	0	0	0	0
8.89213	34.3075	0.279953	22.9286	0	0	0.292421	0	0	0.151943
0	0	0	2.92677	0	0	1.50889	0	0	0.846999
0	0	0	0	0	0	0	0	0	0
21.3635	0	0	2.64677	0	17.8936	242.148	0	0	0
46.1574	1.23057	0	1.19269	0	4.88483	20.4574	2.37235	0	0
1.08516	0.727236	0	1.51376	0	0	24.9137	0	0	0
0	0	0	1.96552	0	0	0	0	0	0
2.32271	0	0	1.4872	0	0	0	0	0	0
0	13.304	0	0	0	0	0	0	0	0
108.922	0.538261	0	0	0	0	0	0	0	0
0	0.613135	0	0	0	0	0	0	0	0
0	0	0	0	0	0	0	0	0	0
0.179626	0	0	0	0	0	0	0	0	0
0	0	0	0	0	0	0	0	0	0
8.72725	0	0	0	0	0	0	0	0	0
0	0	0	0	0	0	0	0	0	0
0	0	0	0	0	0	0	0	0	0
0	0	4.45481	0	0	0	0	0	0	0
0	0	0	0	0	0	0	0	0	0
0	0	0	0	0	0	0	0	0	0
52059.6	336874	620214	404982	79452.6	319323	19500.8	1234.44	4250.99	108249
3020.02	2922.67	1131.1	101.512	1133.99	3933.67	4746.69	0	4188.82	31.2182
103690	4630.72	1018.72	5363.4	6577.65	13930	16203.6	12606	16458.4	860.107
104.938	6.40539	1017.38	116.687	1399.3	21.0411	16205.3	3035.41	14.1145	1.67746
4085.96	17746.8	37471.6	60349	36739.2	7214.13	101091	6.61873	1541.37	136.158
5823.22	83.7706	4.65959	33440.9	0	233227	4.70798	0	0	0
6599.41	1425.3	37.4813	7.39166	138.635	168.605	43.3285	0	0	7.05625
2.80003	107.595	8.05508	429.104	69.6195	279.966	612.971	166.123	31.6823	0
39.6885	2.95119	61.1772	6.28895	0	0	203.096	0.300523	0	0
149.151	646.626	12.2614	415.604	4.01641	21.9601	3628.02	3.39628	15.8998	52.4631
18.1201	6.91958	39.425	26.1449	132.971	0	1075.08	3.1402	132.81	4.8866
5.81587	0	2798.95	71.04	22.139	0	1634.68	0	5.57224	2116.13
181405	130.158	46.6881	134.113	0	157.92	43.798	47.8102	10.0975	0
173.818	5.27668	0	0.0675438	0	0	0	17.9619	213.733	11.4
25.4275	60.0171	0.450987	5315.18	87962.7	4912.82	372.104	12682.3	25.7074	1194.91
6237.01	406.957	179.399	775.143	2622.13	1937.88	1617.22	26.7739	343.953	1.26426
0.281766	0.512275	0	0	0	0	0	0	0	0
160.547	111.951	48.851	1195.09	201393	42.7198	524.955	1.58889	23.391	0
32.4323	0	0	6.44283	0	2.9366	0	0	27.9556	37769.4
416.412	4205.76	4440.26	8611.81	3823.96	6164.85	4625.62	1.84604	5.72058	19.1632
3161.27	8041.62	5731.93	8207.51	479.029	211.106	168.003	0	3.58357	4.16801
44024.6	93.0847	18.6318	30.2751	17.4426	274.39	988.999	252.872	21.9945	0.786107
381.598	196.26	66.7262	574.19	262.634	181.056	257.589	23.9187	36.5549	0.393857
14.9981	1690.71	27.6919	618.384	92.1864	80.4992	33.9116	241208	57.19	0
0.562818	1.44029	0.15405	180.291	0	389.64	10.748	37.5432	200.332	24.8645
28.9766	2418.51	1301.63	2057.27	1162.78	2235.46	190.75	18.7835	5296.26	5.47021
0	1.20275	11.4298	0	10.6291	0	0	63.0282	0	0
0	42.1839	0	1.12989	1.17289	0	6.75546	22.7081	0	0
3.2881	171.769	225.954	1836.18	10214.4	1165.09	2868.09	1.99285	4.43434	2.02842
0	0	0	0	46.8802	0	0	0	0	0
1628.54	949.928	319.024	249.547	34.6666	1133.8	0.673142	0	2.12352	0.138885
0	0	0	0	0	0	0	0	0	0
20.641	15576.8	0	0	30.6684	0.418362	0	0	0	4663.91
5.0066	30.3763	0	2843.37	0.207658	3.83908	103.224	0	42.6235	0
0	5981.82	0	1763.76	0	0	0	0	0	0
19.9105	402.356	99.8712	120.494	47.9171	723.249	6834.94	14.16	311.864	7.89473
0	0	0	0	0	0	0	0	0	0
0	0	0	0	0	0	0	0	0	0
12.8685	93.6147	84.054	145.546	18.6629	86.836	36.9175	0.614016	0	20.0146
142109	281.056	0.231399	0.351464	0	0	139.312	0	1.11059	0
0	0	0	0	0	0	0	0	0	0
860.553	3872.54	14217.4	10321.3	529.618	4995.86	8995.24	2.74443	2307.74	1891.36
3060.99	259.317	2.97198	517.108	393.572	255.562	1986.9	1039.74	79.1308	0.176473
0	0	0	0.117205	0	0	0	0	0	0
0	0	0	0	0	0	0	0	0	0
113.936	82.4263	163.26	98.8048	31.2445	5.66312	551.603	0	8.48322	3.25066
620.506	19.217	17.601	140.56	237.033	46.3439	23.3308	7.16904	49.7594	0
0	0	0	2.17374	0	0	0	0	0.814508	0
12.5644	0	0	0	0	0	0.920244	0	0	0
22466.6	3991.64	1.62889	0	1.92462	6.90559	2.42217	0	0	0
115.689	0.158048	0	13.5912	0.370798	0	0	0	0	0
21.2498	22.9826	188.464	146.523	0.267637	58.1103	3101.76	864.374	186.802	24.728
3932.13	754.391	3.3139	1765.94	2.25436	2046.52	474.635	0	1065.92	0.698732
7.47147	0.673102	13.6205	0	0	0	0	0	0	0
2.87382	177.572	0	59.4651	7.20023	14.0686	325.129	25.2784	32.3497	0
0.452748	15.0919	25.7054	2.04828	0	0	50.0254	36214.8	22.1951	0
267.988	0	0	0	0	0	0	0	0	0
0	0	0	0	0	0	0	0	0	0
743.82	2428.25	1300.14	1154.34	16.774	262.898	153	0	3.34862	0
224.916	1845.36	2577.03	2886.23	437.322	3031.32	8495.19	41.1525	84.1585	26.4001
248.332	45.0297	18.2357	76.0089	0.513941	0	88.9811	0	0	13.754
0	489.928	127.973	114.833	110.996	226.272	208.766	6.89019	69.1759	52.9975
192.5	2019.25	2510.82	2064.49	2184.81	795.078	3590.05	0	351.395	338.029
57.1079	148.002	190.466	175.302	0.237778	70.9919	7.11847	0	0	0
0	8.66089	15.9373	44.406	0	1.11672	5.9056	6211.77	0	1.38539
0	0	0	0	0	0	0	0	0	0
9462.71	2243.91	0.880297	0.956141	0	0.232404	11.1565	0	0	0
148.33	293.557	437.98	311.919	131.436	311.081	411.121	0	3.30595	3.51513
168.9	0	0	1.07304	0	0	0	18.2204	0	0
0	0	0	0.253668	0	0	0	0	0	0
196.14	182.786	17.511	68.7212	24.0615	394.562	704.159	0	0	0
60.713	176.717	231.892	144.12	58.0963	70.3413	885.046	0	4693.84	8295.92
471.36	3202.58	2170.05	2554.4	1538.05	259.608	142.608	0	509.464	1.10035
73.9399	137.063	68.4839	236.393	14.2579	75.2612	739.758	0	0	14.922
0.21487	37.3471	0	0	0	0	0	0	0	0
1.26517	0	0	34.8017	1476.37	0	106.241	0.549206	0	0
0	0	0	0	0	43.1202	0	0	0	0
64.3209	249.327	501.953	364.712	43.1755	122.14	1017.61	0.924064	7.41503	7.69174
8.55438	0	0	0	0	0	0	0	0	0
0	0	0	0.326403	0	0	0	0	0	0
199.464	1.38915	0	0	0	0	0	0	0	0
0	40.7322	8.38713	17.7184	18.1583	16.962	0.311011	0	0	0
180.561	31.1481	8.24665	17.2521	0	6.60194	0	18.8433	0	0
10.8424	37.9013	1.16527	11.1816	0	0	0	0	0	0
5.18684	0	0	0.772459	0	0	0	0	0.462232	17.9235
8.04379	0	0.636111	0.728461	151.408	0	15.5999	0	0	6.68283
32.2974	0	0	2.36305	1.94728	0	77.7637	0	56.718	0
0	0	80.1281	0	0	0	0	0	0	0
0	0	0	0	0	0	0	0	0	0
1211.64	16.349	0.499536	104.708	32.1919	44.421	51.42	1100.47	0	0
0	0	0	9.58629	0	0	0	0	0	0
0	0	0	0	0	0	0	0	0	0
39.3204	0	0	0.334043	0	0	0	0	0	0
158.622	0	0	10.7862	27.2643	0	36.6679	0	0	0
180.661	801.414	1928.37	1726.25	80.0048	1232.45	1902.1	30.306	30.5602	265.516
0	2.40151	0.289331	348.41	0	0	91.2606	0	4.26788	0
0	0	0	0	583.949	0	0	161.939	0	0
145.03	571.039	1041.31	1015.47	553.318	559.891	463.49	69.2968	130.141	0
0	0	0	0	0	0	0	0	94.4799	2190.9
36.6549	163.037	33.0685	321.794	1.50238	300.115	483.466	11.4928	0.525805	301.124
922.368	9.16277	0.207773	29.5554	74.7075	51.6967	19.7213	1445.58	29.9538	3.83675
334.718	22.116	0	31.3729	0	15.2373	0	0	0	1.65971
200.809	116.567	0	106.763	0	0	4.14764	0	0	0
22.1599	0.99499	6.29463	11.343	0.163943	4021.13	1.08281	4304.92	0	0
1.77742	0	0	0	0	0	0	400.298	0	0
89.6947	38.2574	11.4167	201.648	6.29901	48.773	557.627	0	28.6365	0.357747
0.440193	1.39374	0	0	110.378	0	157.758	0	0	0
8.72538	0	0	0	0	0	0	0	0	0
10.4111	123.313	123.543	184.11	3.86871	18.2881	190.51	41.7115	0	0
8.61401	29.1786	91.7933	85.2653	15.9943	37.2744	38.708	0	0	0
0	0	0	38.017	0	0	0	0	0	0.252752
53.2424	364.553	471.813	303.102	2.82669	103.403	443.764	3701.11	529.65	58.117
0	0	0	0	0	0	0	0	0	0
30.4341	0	0	0	402.394	0	0	0	0	0
1.93396	0	0	0.324728	1.7788	0	82.4798	8.48966	0	0
34.6524	9.34303	3.36034	95.724	705.052	12.5103	3021.05	8.91452	0	0
0	0.384269	8.41171	10.2869	0.176207	0.157463	296.124	14.6468	0	3.81544
132.087	12.6757	0	0.310509	2.0715	68.7509	19.8029	0	0	0
0.371302	0	0.694858	0	0	0	2.05934	1931.31	0	0
0	25.297	0	307.248	11.6269	5525.72	59.8137	126.014	0	0
0	0	0	0.252139	0	0	0	0	0	124352
93.1167	711.71	1994.59	1701.94	1131.32	283.632	570.669	1.27617	89.5002	0
0	0	0	0	0.220183	0	0	0	0	0
58.7916	135.323	28.3286	0.195447	7.58998	0	206.037	0	0	0
[truncated: 2,586 more rows]

## Sheet: exposome_chem_sample_info
Supplemental Data S1. All exposome and internal multi-omics data used in this study.
sample_id	start_date	end_date	comments	...5	location	longitude	latitude
B001	2016-01-15	2016-01-18	Campus-home, weekend (No001_beads)	1/15/2016, Campus-home, weekend	Campus	-122.15	37.4089
B002	2016-01-18	2016-01-22	Campus-home, weekdays (No002_beads)	1/18/2016, Campus-home, weekdays	Campus	-122.15	37.4089
B003	2016-01-19	2016-01-22	Porter office	1/19/2016, Porter office	Campus	-122.15	37.4089
B004	2016-01-22	2016-01-25	Campus-home, weekend	1/22/2016, Campus-home, weekend	Campus	-122.15	37.4089
B005	2016-01-25	2016-01-28	Campus-home, weekdays(PWMC)	1/25/2016, Campus-home, weekdays	Campus	-122.15	37.4089
B006	2016-01-29	2016-01-31	SF and Novato, CA	1/29/2016, SF and Novato, CA	SF and Novato, CA	-122.565	38.1069
B008	2016-02-16	2016-02-18	Campus-home, weekday	2/16/2016, Campus-home, weekday	Campus	-122.15	37.4089
B009	2016-02-19	2016-02-21	Campus-home, weekend (dean's retreat)	2/19/2016, Campus-home, weekend	Campus	-122.15	37.4089
B010	2016-02-22	2016-02-25	Campus-home, weekdays	2/22/2016, Campus-home, weekdays	Campus	-122.15	37.4089
B011	2016-02-25	2016-02-27	Montana	2/25/2016, Montana	Montana	-112.038	46.6019
B012	2016-02-27	2016-03-02	Houston	2/27/2016, Houston	Houston	-95.3682	29.7644
B013	2016-03-03	2016-03-07	Campus-home, weekend	3/3/2016, Campus-home, weekend	Campus	-122.15	37.4089

## Sheet: exposome_chem_variable_info
Supplemental Data S1. All exposome and internal multi-omics data used in this study.
peak_ID	MetabID	Chemical_class	Monoisotopic_Mass	mz	rt	Fold_Enrich
PM1527	Diethyltoluamide	Pharmaceuticals and Personal Care Products (PPCPs)	191.131	192.138	11.1994	94.7753
PM0594	Diethylene glycol	Plasticizers	106.063	107.07	7.77973	361.093
PM1062	Decanoic acid	Unknown	172.146	171.344	6.09132	413.006
PM1888	Omethoate	Pesticides	213.022	214.03	5.97242	64.0791
PM0799	Octanoic acid	Unknown	144.115	143.106	7.22012	50.6391
PM0006	Pyridine	Pesticides	79.0422	80.0497	9.67098	19.1062
PM1013	Phthalic acid	Plasticizers	166.027	167.033	22.7088	776.703
NM0522	Hexanoic acid	Unknown	116.084	115.076	4.68815	50.0667
PM1049	4-Aminobiphenyl	IARC Group 1 Carcinogens	169.089	170.176	6.07432	53.1007
PM2363	Aflatoxin B1	IARC Group 1 Carcinogens	312.063	313.213	17.4698	32.0835
NM4327	Aflatoxin B2	IARC Group 1 Carcinogens	314.079	313.236	4.73	33.5743
PM1244	Benzidine	IARC Group 1 Carcinogens	184.1	185.116	6.9582	18.3949
PM1843	4-(N-Nitrosomethylamino)-1-(3-pyridyl)-1-butanone	IARC Group 1 Carcinogens	207.101	208.153	7.80662	31.4034
PM1111	N-Nitrosonornicotine	IARC Group 1 Carcinogens	177.09	178.107	6.95007	16.7888
PM0626	o-Toluidine	IARC Group 1 Carcinogens	107.073	108.081	11.3246	14.3418
PM0034	1,4-Dioxane	USEPA Emerging Contaminants	88.0524	89.0793	7.35323	53.5256
PM2000	2,4,6-Trinitrotoluene	USEPA Emerging Contaminants	227.018	228.195	22.7073	10.8094
PM1180	2,4-Dinitrotoluene	USEPA Emerging Contaminants	182.033	183.174	11.5291	12.3917
NM4287	Perfluorobutanesulfonic acid (PFBS)	Per- and Polyfluoroalkyl Substances (PFASs)	299.95	299.041	8.97	120.436
PM2540	Perfluoroheptanoic acid (PFHpA)	Per- and Polyfluoroalkyl Substances (PFASs)	363.977	365.279	14.0401	667.672
PM2688	Perfluorohexanesulfonic acid (PFHxS)	Per- and Polyfluoroalkyl Substances (PFASs)	399.944	401.268	22.6832	10.0376
PM2739	Perfluorooctanoic acid (PFOA)	Per- and Polyfluoroalkyl Substances (PFASs)	413.974	415.271	22.7068	90.8996
PM2871	Perfluorononanoic acid (PFNA)	Per- and Polyfluoroalkyl Substances (PFASs)	463.971	465.318	22.2758	11.3863
NM3534	Heptafluorobutyric acid	Per- and Polyfluoroalkyl Substances (PFASs)	213.986	212.977	1.12013	11.8803
PM2367	Benzyl butyl phthalate	Plasticizers	312.136	313.32	22.9048	42.488
PM2644	Bis(2-ethylhexyl) phthalate	Plasticizers	390.277	391.412	27.3897	206.961
PM2756	Diisononyl phthalate	Plasticizers	418.308	419.443	27.4105	118.564
PM2846	Diisodecyl phthalate	Plasticizers	446.34	447.474	27.3872	99.3087
PM2260	Mono(2-ethylhexyl) phthalate	Plasticizers	278.152	279.158	22.7083	86.5397
PM1171	Triethyl phosphate	Plasticizers	182.071	183.077	7.70412	38.219
PM1976	Mono-n-butyl phthalate	Plasticizers	222.089	223.096	10.8277	14.8891
NM1446	Trimethyl Phosphate	Plasticizers	140.024	139.022	7.36292	15.3754
PM2198	Triisobutyl phosphate	Organophosphate Flame Retardants (OPFRs)	266.165	267.171	11.1441	139.526
PM2549	Tricresyl phosphate	Organophosphate Flame Retardants (OPFRs)	368.118	369.31	19.4422	238.814
PM2342	Butylated triphenyl phosphate	Organophosphate Flame Retardants (OPFRs)	305.094	306.315	27.1043	47.9403
PM2850	Tris(4-isopropylphenyl) phosphate	Organophosphate Flame Retardants (OPFRs)	452.212	453.338	7.51125	41.0703
PM3083	1,2,5,6,9,10-Hexabromocyclododecane	Brominated Flame Retardants (BFRs)	635.651	636.555	24.0774	122.474
PM3067	Tetrabromobisphenol A diallyl ether	Brominated Flame Retardants (BFRs)	619.82	620.532	23.8123	291.999
PM3706	2,2-Bis[3,5-dibromo-4-(2,3-dibromopropoxy)phenyl]propane	Brominated Flame Retardants (BFRs)	935.493	936.731	24.3762	19.7076
PM2702	Azoxystrobin	Pesticides	403.117	404.424	27.4317	151.651
PM1971	Carbofuran	Pesticides	221.105	222.184	16.3766	33.8784
PM2336	Diazinon	Pesticides	304.101	305.303	25.1127	40.8188
PM2246	Disulfoton	Pesticides	274.028	275.214	13.0856	90.2943
PM2619	Ethion	Pesticides	383.988	385.305	14.0321	59.1605
PM2297	Parathion	Pesticides	291.033	292.234	17.4553	42.2118
PM1048	Glyphosate	Pesticides	169.014	170.153	13.363	187.576
PM2056	3-Hydroxycarbofuran	Pesticides	237.1	238.106	10.5838	31.1913
NM3853	Dinoseb	Pesticides	240.075	239.065	5.92258	15.5181
NM1340	4-Nitrophenol	Pesticides	139.027	138.019	9.20797	18.7216
NM0692	Benzoic acid	Pesticides	122.037	121.029	4.66017	12.6116
PM1801	Carbaryl	Pesticides	201.079	202.179	9.86263	18.7202
PM0996	Fenuron	Pesticides	164.095	165.112	6.3071	76.6632
PM1015	Ethylparaben	Pesticides	166.063	167.073	6.6768	30.7709
PM1018	Cyromazine	Pesticides	166.097	167.106	7.13495	44.9665
PM1454	Tricyclazole	Pesticides	189.036	190.049	22.7074	296.035
PM1594	Isoprocarb	Pesticides	193.11	194.114	8.04698	140.147
PM1499	Aldicarb	Pesticides	190.078	191.15	11.3955	15.1254
PM1836	Aldicarb sulfoxide	Pesticides	206.073	207.083	13.0439	65.7657
PM1849	Aminocarb	Pesticides	208.121	209.138	6.14093	124.563
PM2255	Fenitrothion	Pesticides	277.017	278.268	12.5831	158.302
PM1860	Ethirimol	Pesticides	209.153	210.169	6.66427	162.717
PM1890	Simetryn	Pesticides	213.105	214.119	11.222	29.3164
PM1902	Metribuzin	Pesticides	214.089	215.088	6.41557	157.052
PM1935	Pymetrozin	Pesticides	217.096	218.109	8.53106	36.9953
PM1936	Pyracarbolid	Pesticides	217.11	218.117	13.0375	140.64
PM1944	Thiofanox	Pesticides	218.109	219.108	5.95643	371.736
PM1956	Thidiazuron	Pesticides	220.042	221.04	5.942	292.141
PM1977	Mexacarbate	Pesticides	222.137	223.153	6.32598	69.9101
PM1979	Dioxacarb	Pesticides	223.084	224.099	10.7692	14.0025
PM1990	Prometon	Pesticides	225.159	226.164	6.13569	68.252
NM3793	Siduron	Pesticides	232.158	231.158	4.69243	134.723
PM2201	Diethofencarb	Pesticides	267.147	268.159	7.76807	35.1004
PM2296	Cyproconazole	Pesticides	291.114	292.128	9.2361	121.796
PM2318	Fenoxycarb	Pesticides	301.131	302.143	14.9326	154.263
NM2328	Methylparaben	Pesticides	152.047	151.039	7.93782	14.7796
NM3057	Acephate	Pesticides	183.012	182.008	4.68323	52.2629
NM3471	Propoxur	Pesticides	209.105	208.095	17.2672	12.845
NM3850	Bentazone	Pesticides	240.057	239.049	8.28704	41.8681
NM4303	Fenazaquin	Pesticides	306.173	305.161	9.02394	347.729
NM4280	Captan	Pesticides	298.934	298.044	8.95826	48.5075
PM2493	1,2,3,7,8-Pentachlorodibenzo-P-dioxin	Dioxins	387.819	355.069	21.803	36.1413
PM2632	1,2,3,7,8,9-Hexachlorodibenzo-P-dioxin	Dioxins	387.819	389.11	9.7184	14.712
PM0716	Naphthalene	Polycyclic Aromatic Hydrocarbons (PAHs)	128.063	129.052	6.23177	87.3286
PM0901	Acenaphthylene	Polycyclic Aromatic Hydrocarbons (PAHs)	152.063	153.09	8.14349	13.3684
PM1019	Fluorene	Polycyclic Aromatic Hydrocarbons (PAHs)	166.078	167.146	7.06633	54.1025
PM1121	Anthracene	Polycyclic Aromatic Hydrocarbons (PAHs)	178.078	179.127	6.44988	103.275
NM2977	Phenanthrene	Polycyclic Aromatic Hydrocarbons (PAHs)	178.078	177.091	4.71143	41.794
PM1810	Pyrene	Polycyclic Aromatic Hydrocarbons (PAHs)	202.078	203.146	11.8796	24.3738
PM1811	Fluoranthene	Polycyclic Aromatic Hydrocarbons (PAHs)	202.078	203.183	9.85983	12.2038
PM2002	Chrysene	Polycyclic Aromatic Hydrocarbons (PAHs)	228.094	229.067	16.5283	12.5463
PM2134	Benzo[a]pyrene	Polycyclic Aromatic Hydrocarbons (PAHs)	252.094	253.163	6.06778	85.0901
NM3981	Benzo[b]fluoranthene	Polycyclic Aromatic Hydrocarbons (PAHs)	252.094	251.163	4.71503	25.7546
NM3982	Benzo[k]fluoranthene	Polycyclic Aromatic Hydrocarbons (PAHs)	252.094	251.163	5.61641	11.4492
PM2262	Dibenz[a,j]acridine	Polycyclic Aromatic Hydrocarbons (PAHs)	279.105	280.162	22.7077	46.4783
PM2325	Dibenzo[a,l]pyrene	Polycyclic Aromatic Hydrocarbons (PAHs)	302.11	303.085	14.9398	29.2319
PM1926	7H-Benzo[c]fluorene	Polycyclic Aromatic Hydrocarbons (PAHs)	216.094	217.179	10.9953	27.0249
PM2291	3,3′,4,4′-Tetrachlorobiphenyl (PCB77)	Polychlorinated Biphenyls (PCBs)	289.922	291.106	8.19647	26.1299
PM2293	3,4,4',5-Tetrachlorobiphenyl (PCB 81)	Polychlorinated Biphenyls (PCBs)	289.922	291.231	21.4033	73.4572
PM2654	2,2',3,3',4,4',5-Heptachlorobiphenyl (PCB 170)	Polychlorinated Biphenyls (PCBs)	391.805	393.169	22.7075	10.4622
PM2151	2,4,4'-Trichlorobiphenyl (PCB 28)	Polychlorinated Biphenyls (PCBs)	255.961	257.099	5.58798	17.5045
PM0964	Chloronaphthalene	Polychlorinated Naphthalenes (PCNs)	162.024	163.075	7.72105	52.7582
PM1704	Dichloronaphthalene	Polychlorinated Naphthalenes (PCNs)	195.985	197.123	5.94902	24.7286
PM2187	Tetrachloronaphthalene	Polychlorinated Naphthalenes (PCNs)	263.907	265.136	13.0331	27.3874
NM4272	Pentachloronaphthalene	Polychlorinated Naphthalenes (PCNs)	297.868	297.044	9.11855	174.073
NM4350	Hexachloronaphthalene	Polychlorinated Naphthalenes (PCNs)	331.829	330.977	4.63992	161.655
PM2004	Bisphenol A	Bisphenols	228.115	229.14	7.38784	571.303
PM1795	Bisphenol F	Bisphenols	200.084	201.109	6.42892	175.973
PM2126	Bisphenol S	Bisphenols	250.03	251.184	6.83502	86.9297
PM0834	Chloral	IARC Group 2A Carcinogens	145.909	147.101	7.35967	11.3098
NM1550	4-Chloro-o-toluidine	IARC Group 2A Carcinogens	141.035	140.025	7.35619	10.0184
PM1996	Cyclopenta[cd]pyrene	IARC Group 2A Carcinogens	226.078	227.174	7.83681	158.385
PM0711	Dimethyl sulfate	IARC Group 2A Carcinogens	125.999	127.111	7.68452	41.7033
PM1307	Dibromoethane	IARC Group 2A Carcinogens	185.868	186.75	11.3273	46.0201
NM0104	Ethyl carbamate	IARC Group 2A Carcinogens	89.0477	88.2397	4.86283	10.0652
PM1768	2-Amino-3-methylimidazo(4,5-f)quinoline	IARC Group 2A Carcinogens	198.091	199.169	14.024	24.8204
PM1927	Bergapten	IARC Group 2A Carcinogens	216.042	217.191	5.9874	340.038
PM1024	Mercaptobenzothiazole	IARC Group 2A Carcinogens	166.986	168.063	6.09074	41.8034
NM2174	Methylnitronitrosoguanidine	IARC Group 2A Carcinogens	147.039	146.167	5.89848	14.8709
PM2111	1-Nitropyrene	IARC Group 2A Carcinogens	247.063	248.184	6.99252	99.8646
PM0320	N-Nitrosodiethylamine	IARC Group 2A Carcinogens	102.079	103.128	8.28194	14.214
NM1145	4-Nitrotoluene	IARC Group 2A Carcinogens	137.048	136.261	1.0126	152.93
PM0466	Styrene	IARC Group 2A Carcinogens	104.063	105.122	8.23708	12.4338
PM0682	Styrene oxide	IARC Group 2A Carcinogens	120.058	121.101	7.26818	17.1967
NM2680	Tetrachloroethylene	IARC Group 2A Carcinogens	163.875	162.981	1.13383	33.9258
PM3167	Tris(2,3-dibromopropyl) phosphate	IARC Group 2A Carcinogens	691.581	692.531	16.0452	13.4615
PM2383	3,3',4,4'-Tetrachloroazobenzene	IARC Group 2A Carcinogens	317.929	319.185	10.9194	16.3313
PM2128	Citrinin	Mycotoxins	250.084	251.195	6.66159	57.3233
PM2384	Zearalenone	Mycotoxins	318.147	319.193	9.00086	10.8297
PM2807	Fusarin C	Mycotoxins	431.194	432.455	27.429	95.6664
PM3023	Ergotamine	Mycotoxins	581.264	582.471	24.7474	19.3862
PM1040	4-Ipomeanol	Mycotoxins	168.079	169.126	6.07786	81.491
PM2594	Fumitremorgin C	Mycotoxins	379.19	380.196	22.7147	10.3706
NM4337	Zeranol	Mycotoxins	322.178	321.171	4.63	68.0325
NM4281	Saxitoxin	Mycotoxins	299.134	298.127	4.70095	19.2501
PM2233	Estradiol	Pharmaceuticals and Personal Care Products (PPCPs)	272.178	273.166	6.81091	127.667
PM2226	Estrone	Pharmaceuticals and Personal Care Products (PPCPs)	270.162	271.318	27.6868	74.8414
PM2308	Ethinylestradiol	Pharmaceuticals and Personal Care Products (PPCPs)	296.178	297.241	14.2533	17.7105
PM2312	Norethindrone	Pharmaceuticals and Personal Care Products (PPCPs)	298.193	299.109	7.97338	121.289
PM2286	Testosterone	Pharmaceuticals and Personal Care Products (PPCPs)	288.209	289.176	11.5002	34.8633
PM2532	Hydrocortisone	Pharmaceuticals and Personal Care Products (PPCPs)	362.209	363.176	8.5104	33.8539
NM1254	Salicylic acid	Pharmaceuticals and Personal Care Products (PPCPs)	138.032	137.155	4.68865	665.534
NM4270	Musk xylene	Pharmaceuticals and Personal Care Products (PPCPs)	297.096	296.229	4.76173	317.208
PM2159	Galaxolide	Pharmaceuticals and Personal Care Products (PPCPs)	258.198	259.189	13.2638	12.3621
PM2158	Tonalid	Pharmaceuticals and Personal Care Products (PPCPs)	258.198	259.15	6.4861	17.1985
NM3747	Oxybenzone	Pharmaceuticals and Personal Care Products (PPCPs)	228.079	227.2	5.71488	71.7843
PM2143	Enzacamene	Pharmaceuticals and Personal Care Products (PPCPs)	254.167	255.155	7.90938	18.166
PM2295	Octyl-methoxycinnamate	Pharmaceuticals and Personal Care Products (PPCPs)	290.188	291.287	24.9439	196.177
PM1149	Aspirin	Pharmaceuticals and Personal Care Products (PPCPs)	180.042	181.162	7.75812	20.1087
PM1900	Clofibric acid	Pharmaceuticals and Personal Care Products (PPCPs)	214.04	215.052	15.3833	12.7546
NM2302	Paracetamol	Pharmaceuticals and Personal Care Products (PPCPs)	151.063	150.019	4.55049	12.6918
PM2804	Budesonide	Pharmaceuticals and Personal Care Products (PPCPs)	430.236	431.443	25.7431	62.8448
PM2541	Amoxicillin	Pharmaceuticals and Personal Care Products (PPCPs)	365.105	366.18	24.6552	12.1908
PM2839	Tetracycline	Pharmaceuticals and Personal Care Products (PPCPs)	444.153	445.266	5.02477	127.415
PM1838	Ibuprofen	Pharmaceuticals and Personal Care Products (PPCPs)	206.131	207.24	7.375	304.361
PM2019	Naproxen	Pharmaceuticals and Personal Care Products (PPCPs)	230.094	231.158	10.0023	61.1465
NM4256	Diclofenac	Pharmaceuticals and Personal Care Products (PPCPs)	295.017	294.132	5.58952	19.9084
PM1880	p-Hydroxy-meta-chlorophenylpiperazine	Pharmaceuticals and Personal Care Products (PPCPs)	212.072	213.108	8.00713	73.9446
NM1240	4-Hydroxybenzoic acid	Pharmaceuticals and Personal Care Products (PPCPs)	138.032	137.047	4.68869	247.685

## Sheet: exposome_chem_expression_data
Supplemental Data S1. All exposome and internal multi-omics data used in this study.
B001_1	B001_2	B001_3	B002_1	B002_2	B002_3	B003_1	B003_2	B003_3	B004_1	B004_2	B004_3	B005_1	B005_2	B005_3	B006_1	B006_2	B006_3	B008_1	B008_2	B008_3	B009_1	B009_2	B009_3	B010_1	B010_2	B010_3	B011_1	B011_2	B011_3	B012_1	B012_2	B012_3	B013_1	B013_2	B013_3	B014_1	B014_2	B014_3	B015_1	B015_2	B015_3	B016_1	B016_2	B016_3	B017_1	B017_2	B017_3	B018_1	B018_2
124664	126952	129530	128244	133118	128273	127545	123095	129591	126352	122736	127385	129846	124949	130731	1.33716e+06	1.39087e+06	1.41916e+06	4.05877e+06	3.87247e+06	3.90061e+06	1.44995e+06	1.45109e+06	1.45632e+06	6.78967e+06	6.36162e+06	6.48601e+06	4.72894e+06	4.95752e+06	4.98002e+06	1.86081e+06	1.8685e+06	1.95412e+06	1.85417e+06	1.93975e+06	1.89735e+06	5.16386e+06	5.32045e+06	5.15621e+06	6.2569e+06	6.60079e+06	6.72158e+06	6.36082e+06	6.46151e+06	6.37683e+06	3.94803e+06	4.11938e+06	4.05232e+06	3.42907e+06	3.59513e+06
6306.84	4471.99	5081.02	5141.56	5126.01	5285.65	5400.67	4159.57	4224.51	5436.43	5099.11	3972.02	5232.55	4048.66	3617.5	787509	778682	733944	968326	929953	798667	161363	153770	122663	1.36178e+06	1.23353e+06	1.15844e+06	541893	511752	445310	642777	675705	574462	85443.3	81511.4	69336	4.17049e+06	4.10097e+06	3.90288e+06	2.75633e+06	2.71319e+06	2.56519e+06	2.16575e+06	2.09641e+06	1.85318e+06	726129	607263	488607	4918.56	164498
153.334	0	150.695	135.058	150.543	0	144.056	0	164.828	168.076	0	0	0	148.996	0	60221.6	54994	53709.5	16721.7	13589.8	14086.9	4734.33	4239.32	3087.43	20453	20698.5	17256	8115.62	8278.02	6621.8	45811.2	44751.6	40348.2	6698.11	6243.49	5888.36	8971.93	7879.01	7195.42	20068.7	20147.6	19013	7616.17	7798.03	6189.09	10661.9	9729.79	9177.67	3397.98	2988.78
4005.26	3998.28	3742.1	4210.39	4118.5	3528.54	3985.73	4721.91	4616.75	3495.64	3276.73	4026.39	4096.68	4521.16	4236.68	282749	275521	250838	19641.8	16516.8	16569.8	16819.6	17036	15669.7	31380.9	30703.5	26187.9	19459.7	18363.6	15850.3	200519	195500	169338	13196.8	11858.9	10546.8	19153.3	17074.6	15730.3	55237.8	54376.6	45332.6	24498.1	23259.4	18114.6	20109.9	18636.2	17085.8	14311.6	13253.2
29663.8	31339.8	29889.1	29310.8	32423.8	30190	34191.6	28958.1	29473.1	31984.7	29990.8	32341.8	32485.5	28416.7	28991.7	743440	765277	761593	633667	706735	665963	470018	509638	490806	1.06415e+06	1.11373e+06	1.165e+06	1.22754e+06	1.33396e+06	1.28742e+06	655600	657979	658954	106679	100414	109516	682105	644246	694276	582732	612744	619383	2.12518e+06	2.15504e+06	2.11491e+06	388637	417463	397119	2.05899e+06	2.00296e+06
58642	56912.1	54767	59195.8	57387.4	49325.8	63341.9	59074.8	54407	61076.8	54387	55553.6	59287.7	52940.4	52938.9	166699	119511	115912	327894	253047	254408	144844	104181	104054	139280	106854	98647.1	697930	709440	647749	343739	222421	154941	119119	76254.9	91449.1	330649	279314	263422	119440	87890.9	79836.5	1.65024e+06	1.74928e+06	1.58548e+06	95174.3	87462.7	53492.8	944723	834029
4579.17	2888.98	3389.86	2738.84	3015.42	3178.48	3205.09	2553.22	2317.79	3024.54	2912.4	2862.87	2886.58	2996.36	2456.57	3896.44	3801.85	4092.12	305803	319108	318363	102711	100707	104028	657496	686336	706497	1.46636e+06	1.54288e+06	1.52813e+06	5531	5400.16	5092.5	222106	218634	229599	1.16328e+06	1.22983e+06	1.20012e+06	972067	1.07032e+06	1.05119e+06	1.78277e+06	1.83727e+06	1.77727e+06	657513	690608	693552	972849	1.0097e+06
162570	113830	120433	136202	112321	127749	143236	122721	101281	127813	114950	101983	117570	116369	100696	3.84548e+06	4.6292e+06	4.89844e+06	3.46294e+06	4.02252e+06	3.91097e+06	3.48619e+06	4.08209e+06	3.9191e+06	4.77864e+06	5.25863e+06	5.24892e+06	3.35481e+06	3.63173e+06	3.63294e+06	4.78487e+06	5.41799e+06	5.13656e+06	1.19376e+06	1.34203e+06	1.32527e+06	7.17279e+06	9956.72	7.55263e+06	6.19518e+06	6.96548e+06	6.56789e+06	3.42042e+06	3.78757e+06	3.78243e+06	2.60359e+06	2.88055e+06	2.95178e+06	2.62292e+06	2.82744e+06
479.334	689.433	140.56	288.874	702.675	154.244	274.244	0	476.149	299.982	437.634	632.337	697.922	0	0	20529.1	10433	26827.1	9023.12	9883.96	10050.5	2315.32	2374.96	2263.22	14128.2	13700.6	10038.4	4613.66	4478.47	3518.75	14396.5	17369.6	25476.4	2958.28	3190.86	2963.56	4219.86	5134.99	4679.03	10664.1	11957.7	6023.29	4933.18	3151.25	3941.44	5551.38	4739.9	5249.57	1237.61	1419.15
17903.5	18317.2	18446.2	17716.3	18037.8	17200.5	18357.5	18653.5	18784.1	18516.1	17479.4	20489.1	19241.2	19370.4	18259.4	20941	21795.3	21026.3	82021.8	60879.6	75016.1	48663.1	49335.6	49105	201395	161824	176197	37116.9	39100.4	37342	20970.8	22972.3	21397	87513.3	90120.7	87732.2	209708	189508	179033	453754	339550	414493	64848.6	66258.9	46868.5	268155	272180	220720	30353.8	30215.1
985.308	536.893	907.939	1549.32	586.529	1607.04	1325.07	1450.62	470.227	650.218	701.454	551.509	1368.82	325.379	1708.43	3311.75	5380.25	5497.08	14405.9	14623.3	12843.4	7184.69	4910.41	4893.23	14308.3	13436.2	6897.85	9067.93	10138	13302.3	6455.43	7590.85	7633.15	6190.15	8348.84	7918.24	7437.79	9818.2	8575.9	10994.4	9244.24	10064.3	12829.8	11501.6	10917.3	82147.2	86478	68729.7	97320.5	133584
12811.1	12329.1	12131.3	11736.9	12388.8	11607.9	12730.8	12782.4	11909.3	13328.6	11809.7	11394.6	13664.3	12997	12341.4	208414	237521	233002	150760	141530	187352	125008	126854	139658	229314	260486	285670	148892	153834	164660	129369	178663	183834	70854.1	49422.3	74332.3	243147	239248	262854	179967	204233	203898	271504	215619	203987	112970	123835	119737	112803	104594
12258.6	11344.1	9720.24	11632.4	10533.2	11747.5	11453.4	10197.5	11325.3	10936.6	13613.7	11356.8	12750.2	12502.1	14236.7	21469.7	42520.6	29059.1	56023.6	68018.7	37779.6	48372.3	72005.3	85759.7	43411.9	38525.1	30587.5	314190	344902	468150	22643.6	26542.4	40236.5	18493.9	17717.7	18519.7	34480.9	60728.7	22106.9	331827	371730	395566	25439.3	18809.8	32760	38467.4	56445.8	88507.1	16873.4	17577
12673.6	12510.5	12852.6	13143.7	13555.4	12581	12238.8	13300.2	12657.7	12961.3	13731.9	13019.9	12719.7	12280.1	13556.6	123903	116499	122930	119131	126636	133205	137106	147936	163887	137946	149375	166679	197847	217063	236708	191591	240547	260242	205585	237794	261449	182053	180173	226629	180586	184496	218822	13120.1	13445.3	12081.1	13112	14212.6	12501.4	13364.7	13238.8
60439	55148.9	54874.7	58345.5	57917.3	51313.5	55748.8	55974.6	49933.6	53584.8	52585.6	54184.6	57624.5	51266.8	51158.1	561680	558994	398881	291792	242196	330364	311116	145660	82583.8	274812	462124	426720	202053	371735	270906	327608	259654	228198	143371	118160	103208	730888	709265	410312	86430.4	173371	131802	1.15332e+06	1.16011e+06	1.02623e+06	208004	174972	155316	196936	372685
32827.5	31177.7	32972.3	34163	34220.5	29621	33389.3	33477.3	33531.8	29899.3	32256.4	31889.3	33045.3	31987.9	30679.1	88143.3	74417.9	87210.6	861719	741987	678839	79525.9	71491.5	62228.8	1.10863e+06	1.05813e+06	916418	246341	245583	191332	643411	559706	434197	120210	107717	91531	2.71315e+06	2.46266e+06	2.27028e+06	2.00503e+06	1.92623e+06	1.72604e+06	1.46442e+06	1.28531e+06	1.01566e+06	470985	394773	271653	89453	70070.8
11894.8	11687.8	10701.7	11199	11396.7	10765.7	11656.7	10965.7	11562.2	11703.6	10867.3	10942.7	10723.7	11135	11021.4	21014.2	47587.3	41421.4	53904	48767	59983.9	24771.5	34379.5	31788.7	46081.2	58418.2	30844.8	103126	248384	234697	30917.3	34175.8	21191.6	6724.21	55252	65561.4	226975	233781	150117	52751.5	23874.7	34876.3	162331	157754	90238.8	130279	135707	128450	60204.6	58442.7
43555.9	15952.8	9882.45	50158.9	14313.7	10048.7	29134.9	12042.4	7078.52	21751.3	11867.2	7030.51	19125.7	10684.7	5157.03	27825.5	28245.6	27076.8	4897.89	3234.23	2609.3	5182.51	3563.12	2891.09	5947.94	4481.44	3716.18	4832.44	4548.38	4183.96	26585.1	28581.7	26710.5	3687.47	3584.89	3175.1	4623.29	2544	4048.26	4493.54	4234.53	3052.11	4477.11	5015.57	3625.8	3219.58	2970.98	2960.9	3348.73	2609.88
277.238	0	0	0	317.925	0	342.748	314.263	0	0	0	0	0	0	321.256	1553.64	1951.78	2137.48	2026.03	1716.92	2967.4	399.586	982.87	812.654	395.232	1004.36	2486.78	16510.2	17751.4	15346.4	891.175	450.241	1257.83	360.292	312.467	0	1451.17	313.92	867.415	686.02	972.577	278.043	38204.4	39380.2	40161.7	1003.67	320.566	1668.69	52651.8	54734.7
401.076	520.701	609.175	855.392	597.583	0	0	368.869	560.128	352.145	172.269	0	392.619	341.554	155.156	6281.14	7416.33	7390.09	97876.8	100665	95473.5	10002.9	12506.7	12618.3	100809	109030	109911	22037	22809.4	21770.3	3267.7	2515.48	2704.06	12338.2	13854.1	12877	46718.8	50812.3	48645.1	57122.5	30017.7	60641.3	28465.4	30846.7	30064.4	52050.5	51703.8	52808.2	20458.5	20814.4
10240.8	10730.1	11575.8	11716.3	12205.1	13237.8	10728.9	11345.7	11165.9	11407.6	10944.1	10494.4	10501.3	11793.2	10650.1	10237.6	10091.2	10211.4	17116.1	19320.9	16614.1	11785	11900.6	10484.2	29030	28241.1	26420.7	16257.2	56344.1	24699.6	10324.7	10401.7	10386.5	14975.2	14587.8	15023.1	56545.2	54965	58568.7	49708.8	53383.7	52958.9	82071.8	63571.1	75946.7	24531.5	23431.5	24922.8	13229.3	23297.2
4085.86	4295.96	4311.92	4219.91	3220.5	3553.41	3107.6	3331.25	3695.24	3737.76	3941.84	4412.2	4059.47	3993.08	3797.88	3308.62	3446.54	2537.87	51820.9	51162	30021.1	27697.1	18837.4	26795.1	107541	113152	108905	203101	226044	231618	4205.43	4393.79	4017.47	22960.9	32640.9	38428.1	191814	196962	172639	160059	166489	151319	230469	123137	267803	101185	99026.1	98776.3	149224	139518
1340.84	1789.97	1893.23	2650.36	1971.02	2324.15	2302.38	1708	2182.26	1945.14	2187.44	2839.82	2104.41	1830.73	2600.93	18594.3	8653.41	15468.5	1654.56	1933.87	1515.55	3445.08	2275.99	2831.51	1915.27	1369.71	1688.43	1069.65	2170.47	1600.7	2224.27	1760.64	2513.28	2368.8	1557.45	1962.79	2049.45	2018.97	1891.08	2339.39	1788.7	2446.52	507.039	569.948	1283.03	508.675	1086.41	902.225	1225.83	582.172
27495.6	29337.2	20629.9	33426.3	25828.8	531341	34448.4	24432.8	678833	28591.8	16762.4	581615	16716	18061.9	627092	37868.8	31251	21968.8	45043.7	38387.1	7971.64	41331.2	31369.6	27517	43541.3	44963.5	844674	1.43237e+06	18131.2	26093.4	34696.3	36815.4	32207.8	24929.1	952304	22558.9	552362	26065.8	24493.3	41333.8	20017.3	21294.1	1.35961e+06	32218.5	31173.2	39553.3	27088.4	649809	25040.3	33297.9
887.831	1446.49	1045.56	1464.32	1338.41	1044.49	784.185	1672.36	874.245	1324.57	1830.6	1426.82	897.677	1010.54	1294.3	71954.6	78722.4	70914	58484.1	62841.2	59186.3	32948.7	28638.3	32211.8	13064.8	33473.9	23364	69226.4	77783.7	77802.6	67003	70130.3	68226.9	81305	79882.4	82773	74543.2	68102.1	76009	76219.4	51069.2	79448.4	2378.08	1322.41	1784.52	3298.29	2087.64	4266.6	4404.97	3593.17
0	0	149.242	222.944	140.439	152.301	0	320.91	147.467	151.902	0	140.433	0	278.577	134.07	0	0	0	0	0	496.967	137.112	164.375	0	418.852	958.809	1198.56	221809	202673	208094	1639.52	2084.39	1498.75	186.942	273.241	0	274.739	153.234	171.154	134.402	227.357	434.822	54504.9	56499.6	64391.9	309.236	136.555	131.808	105458	123105
214.194	0	278.021	0	0	157.72	0	0	170.999	0	0	268.022	0	133.972	148.675	180.871	469.395	277.258	276.851	296.902	0	628.666	132.642	165.944	3421.91	4041.95	4285.84	200190	249029	258177	4105.35	4592.39	3791.23	0	180.33	282.602	296.313	270.776	283.293	138.611	0	0	63003.1	63084.8	73496.1	1234.06	302.177	837.552	88768.3	126061
0	0	0	0	0	0	0	0	0	0	0	0	0	0	0	0	136.567	0	0	0	0	0	0	0	394.252	640.166	478.632	56250.7	37150.6	34846.6	678.249	1535.2	1287.88	0	0	0	0	0	0	0	0	0	17327.9	17902.2	17245.5	0	182.318	0	16136	17717.2
33457.1	31486.2	30243.4	30899.5	30938	33096.3	31506	32741.3	32693.5	32321.7	29953.1	30274.4	31333.4	31741.7	31180.7	37387.7	34312.7	32885.5	393676	409701	395559	168012	221571	169717	787606	849532	824776	1.7193e+06	1.7685e+06	1.77538e+06	36523.7	37894.3	35782.2	299095	291747	299233	1.39828e+06	1.44048e+06	1.42803e+06	1.15931e+06	1.21164e+06	1.35133e+06	2.24354e+06	2.14707e+06	2.08586e+06	813960	815223	828755	1.16395e+06	1.16688e+06
152587	289694	285394	263492	310427	339845	330739	309550	163205	280398	325436	148989	303053	159746	165053	498848	524801	515211	312600	332350	346846	219729	236180	216628	309021	331400	326484	49865.1	437249	434537	3.85026e+06	3.94547e+06	4.05887e+06	90615	98552.1	94186	408935	228502	34174	220743	148625	263092	434845	240909	456653	145901	107777	144115	101301	99587.8
33692.1	23791.2	21469.9	27983.6	23283.7	20757.4	28016.8	22486.8	21972.5	26021.2	22890.1	22805.7	26044.9	22427.3	21943.9	534331	570648	581893	980863	1.10172e+06	1.11768e+06	461421	467343	491628	1.65999e+06	1.72806e+06	1.75173e+06	1.60283e+06	1.59681e+06	1.6167e+06	437722	436355	442781	427223	452632	445310	1.71472e+06	1.69947e+06	1.69656e+06	1.60649e+06	1.63879e+06	1.65933e+06	2.04461e+06	2.00857e+06	2.09581e+06	1.09045e+06	1.04883e+06	1.07077e+06	1.08368e+06	1.07787e+06
627454	593141	558775	631633	599634	495879	672579	573582	406826	632080	578376	402658	612870	580180	396392	32617.7	1.07622e+07	1.11654e+07	4.44557e+06	4.66418e+06	4.81904e+06	3.3767e+06	3.43288e+06	3.43918e+06	20869.4	7826.06	46265.3	2.59752e+06	2.68877e+06	2.71021e+06	8.65931e+06	38535.6	9.16003e+06	1.62766e+06	1.67744e+06	1.63857e+06	885366	926754	929797	1.4221e+06	1.48032e+06	1.47837e+06	1.98952e+06	2.09369e+06	2.03703e+06	2.35796e+06	2.45946e+06	2.39494e+06	908931	950592
24973.7	23085.2	23572.8	25390.2	24104.1	22027.4	23466.4	22724.6	21612.3	24303.1	23167.3	21333.8	24141.6	22321.2	23030.8	951053	1.00714e+06	1.01928e+06	943102	1.38306e+06	1.36785e+06	454746	448309	465426	2.2344e+06	1.64427e+06	2.27109e+06	2.08267e+06	2.09342e+06	2.11731e+06	563327	574160	598609	575708	586988	597855	1.94201e+06	1.93856e+06	1.95303e+06	2.27644e+06	2.3294e+06	2.32517e+06	2.67502e+06	2.73996e+06	2.69074e+06	1.36628e+06	1.37592e+06	1.42961e+06	1.39752e+06	1.05349e+06
2384.27	1484.83	2033.26	1604.38	1852.07	1379.88	1214.22	3219.36	3104.92	1303.28	1634.7	1364.67	2503.36	1457.52	3134.62	1235.78	2554.26	2678.96	2224.86	3084.84	1703.86	2106.89	3221.45	1326.21	2403.17	2588.15	3266.78	3913.35	3399.26	3721.77	2216.86	1857.28	1887.81	2128.51	1655.73	3001.07	2835.52	2553.08	1993.88	1882.55	3550.69	1735.54	2915.66	4200.67	3883.9	157244	282857	377776	225616	389645
421.172	398.685	1381.02	418.614	848.937	682.394	447.95	733.673	267.969	471.781	971.837	479.52	579.583	635.908	599.231	623.519	932.402	304.959	1986.74	1271.14	2409.17	803.019	1502.73	573.024	4058.37	4634.55	3172.27	58135.4	51087	55478.5	1398.35	1136.98	708.106	433.695	1108.03	0	1203.68	860.657	1147.43	2698.88	2977.37	1961.03	14312	14764.4	14374.5	1177.74	1409.35	1558.55	21278.1	20586.7
1487.81	1404.36	2114.83	966.94	1451.76	2228.18	1106.08	1568.81	1348.97	1107.18	880.439	835.665	965.952	1469.55	943.559	26521.1	52733.3	39515.8	7794.37	6310.49	14244	6832.52	9137.56	10465.7	3650.16	3483.29	3850.8	3223.99	1930.89	1870.16	14166.7	14514.9	5086.56	9867.56	7073.01	8852.41	8243.42	11302.4	14701.5	8453.65	10697.3	16225.3	36546.2	13497.6	32132.8	5474.45	24515.3	10097.9	44785.2	39623.7
607.91	460.062	0	527.618	502.837	188.695	0	171.775	413.699	0	337.587	738.518	318.178	157.922	314.451	178.798	0	185.105	0	0	309.171	0	358.599	0	159.323	314.799	302.105	153.172	171.367	0	333.508	178.173	162.099	202.004	160.03	0	149.304	531.93	0	151.703	167.807	0	0	326.764	212.595	7272.47	8806.42	6863.24	10535.3	27305
138.741	0	0	0	0	0	0	142.606	158.609	161.382	0	153.518	436.544	0	180.66	0	0	0	0	0	0	0	178.957	0	0	187.136	173.74	199.534	0	0	0	177.452	0	288.797	0	0	503.092	0	0	185.437	0	157.525	386.62	0	0	16512.1	17489.5	20841.7	30829.5	26332.5
0	0	0	0	0	0	150.662	0	0	0	0	0	0	0	0	0	3359.7	3106.27	135.673	1320.33	909.466	0	0	227.154	0	193.886	0	0	0	0	146.173	0	0	0	0	0	0	0	0	335.845	0	0	0	151.764	163.463	36980	40530.1	32795.8	6443.72	104579
1877.22	0	0	0	0	0	134.313	0	0	0	0	153.487	0	146.113	0	0	2620.37	3150.66	295.558	1548.81	1017.96	439.142	1229.37	589.551	9510.43	11598.7	12889.9	1.25517e+06	1.31611e+06	1.34392e+06	13986.3	16540.7	16709.6	1431.41	1174.79	1264.89	916.801	2430.89	2654.66	889.987	592.812	500.377	362744	341787	404094	6042.05	6398.43	7212.86	624804	907297
2565.69	3800.72	1953.16	3550.21	3044.47	1354.37	3028.85	1693.6	1139.21	2436.47	1797.4	1597.69	2882.11	1420.38	998.542	3103.55	5802.17	5187.87	4569.35	4766.64	6360.13	3950.02	2810.64	4483.55	6782.79	8417.87	7588.28	27624.7	28170.4	28403.1	5532.23	6577.46	6075.04	2133.65	2841.57	3163.04	6600.82	6848.13	5368.41	6819.76	5065.09	6747.21	15619	17446.5	18358.1	4164.55	5174.32	6142.69	37686.8	42013.7
346.772	487.29	657.212	557.772	1101.69	413.428	143.893	438.19	358.771	412.358	776.075	511.74	150.681	789.208	630.269	1372.77	1170.59	1389.94	3185.38	3757.92	2044.77	1944.27	1020.58	1223.98	4292.42	4160.83	4587.62	16388.2	17084.3	16638.1	977.185	1739.84	1542.55	867.199	1337.39	1329.33	2335.67	1754.23	2252.62	4285.52	3040.18	2688.73	6032.19	7000.18	5987.99	2772.25	1614.71	2071.58	6719.62	8031.27
5427.77	6619.18	5992.97	6330.26	6453.2	7331.31	5068.02	6605.96	4247.63	4385.11	7145.88	4824.76	5709.68	5489.82	6339.21	15856	16480	16750.5	20472.5	21075.4	20212.2	10642.2	10105.2	10502.2	22374.3	20617.6	20329.7	17702.3	19550.9	18137.7	14271.5	15408.2	14560.5	7920.48	7217.07	9051.3	16300.7	15213.5	14713.7	16160.8	16410.4	15894.1	18792.7	19832.8	19852.2	12843.2	14466.1	13048	13640	14609.4
2952.24	3717.34	3096.09	4338	3703.97	3992.35	2848.91	3123.62	2342.78	2386.28	3267.63	3094.03	2359.53	1825.93	2941.85	3611.33	3847.71	4289.99	5636.45	4716.41	4579.12	4822.7	4493.12	3719.09	5785.63	5235.82	4619.11	4427.55	3551.75	3715.55	4305.8	5278.41	4140.34	4660.38	3409.49	5252.06	3609.38	4015.76	5759.66	4256.23	3940.46	3640.83	3022.71	3410.4	4379.42	52116.6	79767.5	135947	59475.7	12003.1
7677.16	7094.87	8751.6	7876.95	6671.27	6100.86	6744.79	5520.84	8745.18	6751.28	7990.13	6499.2	6339.11	6401.1	8183.13	10439.6	10102.5	10996.5	40304.1	40531.1	38443.5	22710.8	21598	22563.5	63385.2	46878.7	48597	17401.1	17830.1	17109.3	8528.32	8881.58	9603.11	37609.8	39055	34733.9	78033.8	76644.9	74439.3	148389	142780	136822	31751.7	31926.3	29870.3	97579.9	97191.3	92159.8	15453.1	14533.1
1671.32	1895.61	1280.57	1919.65	1784.66	1681.23	751.195	2019.08	1380.84	1563.57	647.547	1343.54	1654.69	1350.48	1652.55	7631.13	8595.93	9320.99	5429.21	5808.18	4971.14	20132.3	19581.4	19231.4	8119.38	7923.57	7487.84	22456	21934.1	18494.6	5925.58	6614.97	3833.38	2223.74	4012.01	1849.45	8091.89	9738.78	9136.9	6076.74	5543.55	5067.12	24795.2	22093.4	23339.2	3547.67	4504.86	3964.14	16567.5	18432.4
3191.16	3614.48	3500.34	3079.5	3190.67	3776.76	4044.87	2550.38	3531.7	4134.01	3932.52	3157.37	4273.72	3759.19	3348.11	59475.7	70153	68971.7	27357.1	29957.6	34160.6	10496.3	12146.3	13955.3	45197.4	47360.9	46937.1	12316.4	33680.1	31372.7	29009.1	32228.9	20573.1	14604.7	14196.6	14345.2	20148.3	25043.2	25471.4	36979.5	38393.4	37726.1	42952.8	35679.1	43199.5	31543.2	34669.4	33492.5	23294.1	23508.2
282285	273677	271472	291405	259652	285130	279400	278767	306958	282985	264661	315960	276491	280409	302494	1.376e+06	1.85005e+06	1.9949e+06	311602	307185	99180	337329	303664	302623	927074	967933	1.03223e+06	77631.8	70981.5	60464.7	231513	213483	305256	310377	27971.1	298889	101406	460251	318300	426777	454935	443608	1.612e+06	1.97682e+06	1.87477e+06	168996	181395	128051	69444.9	49172.6
804068	660483	621086	779427	618877	605659	759577	636189	521980	723754	597224	514919	675012	621093	522145	3.34889e+06	3.45543e+06	3.77243e+06	1.65265e+06	1.90642e+06	1.98114e+06	1.26856e+06	1.40166e+06	1.55509e+06	1.88549e+06	2.16612e+06	2.20322e+06	2.12184e+06	2.59608e+06	2.40967e+06	2.79827e+06	3.13106e+06	6.46059e+06	1.03908e+06	1.22355e+06	1.20467e+06	786441	958857	961844	863293	1.04065e+06	1.03573e+06	1.37297e+06	1.66419e+06	1.61495e+06	1.14105e+06	1.35691e+06	1.31556e+06	1.21402e+06	1.42012e+06
825429	718937	738498	782993	749170	773037	786068	748775	183985	752544	742537	624908	727285	741476	625105	4.22656e+06	4.29559e+06	4.24609e+06	5.33565e+06	5.54486e+06	5.1747e+06	2.219e+06	2.357e+06	2.25043e+06	5.94346e+06	6.083e+06	5.93555e+06	3.19907e+06	3.15073e+06	3.18426e+06	5.289e+06	5.51216e+06	5.11494e+06	3.18807e+06	3.31538e+06	3.14767e+06	4.29815e+06	4.71007e+06	4.44577e+06	147464	5.51602e+06	5.57473e+06	4.1434e+06	6908.45	4.28691e+06	4.59067e+06	4.80047e+06	4.65175e+06	2.77807e+06	2.84358e+06
14443.3	15961.8	15209.8	15621.2	14654.8	15537.7	14647.6	15425.7	16473	13857.6	16254.2	16353.8	14373.8	13860.2	14953.5	187332	193160	182160	470321	455810	456157	479042	472492	475273	448237	432556	439905	472323	489865	467192	521125	518357	520384	523715	529417	540271	450523	466794	450497	474651	474084	463031	65023.5	64096.2	61624.4	58354.4	65035.8	60258.6	63333.5	64737.1
33745.9	30788.4	34109.9	34311.2	31880.5	31638.9	30552.3	30434.1	31734.2	32323.5	29926.5	29943.9	34649.7	31385.3	30118.5	3.06135e+06	2.85249e+06	2.64048e+06	1.50885e+06	1.41247e+06	1.35451e+06	579550	546135	537895	1.99132e+06	1.98386e+06	1.86869e+06	747660	752720	712830	1.42305e+06	1.35751e+06	1.28215e+06	417619	402105	382010	784657	755430	689614	1.46042e+06	1.42942e+06	1.32032e+06	595716	585659	541181	647557	643745	582837	139750	136484
8063.84	8793.33	7420.91	7527.98	8171.93	7394.37	8614.15	7149.58	7770.32	8282.57	8060.89	7778.3	7764.45	7271.12	8163.5	39508.6	36342	43256.2	87374.9	74693.7	89675.5	38894.2	39438.4	36963.6	213027	201394	221224	67915.5	62406.1	67977.6	163964	157940	64215.8	24784.5	25614.5	22420.2	187348	209101	219596	161796	162595	298520	156057	143040	167398	54296.7	59556.6	57904.4	41160.3	36125.9
9180.25	10254.9	9920.1	9248.21	10028	9822.5	10779.6	9118.41	9266.03	10347.2	9908.01	10110.2	10497.4	9835.83	9213.06	284340	350102	328143	266413	343350	321665	85360.4	111275	100157	491348	604557	499371	182795	185042	184966	203340	220354	248725	59081.1	52592.7	65133.3	319251	350378	310067	372179	244523	335830	307320	281964	287397	116621	141976	125042	71149	119426
13745.2	16075.2	13794.1	15676.1	13994.3	13742.4	13278.3	15896.9	14557.2	14944.1	15182.8	15262.9	14666.3	15194	14460.7	12799.5	12124.2	14376.3	454902	503990	486825	192371	198514	201669	1.12784e+06	1.20357e+06	1.20179e+06	2.74962e+06	2.8903e+06	2.85117e+06	17761.2	17903.5	15534.6	351993	357712	370601	2.19489e+06	2.34812e+06	2.20272e+06	1.85074e+06	1.90957e+06	1.828e+06	3.46554e+06	3.52273e+06	3.31722e+06	1.25297e+06	1.31563e+06	1.25434e+06	1.89284e+06	1.98513e+06
8480.91	8434.16	9477.75	9049.83	9900.75	10314.3	8736.65	8930.08	9473.33	9621.01	9251.28	9206.31	8681.67	8918.4	9958.3	582177	527863	390755	11975.1	18884.3	23030.6	5161.62	3879.39	4807.04	11691	26160.1	14303.7	3690.21	13855.5	7622.23	9139.3	20418.7	16659.6	10865.1	10153.4	24260.1	159043	70442.8	148978	5675.15	8729.24	2721.84	29711.7	15180.1	13409	95486.4	26627.5	65789.7	4660.46	1606.36
7700.88	3170.71	2590.5	5250.82	3372.08	2718.16	4366.82	3638.2	2648.32	4808.92	3194.02	1858.09	3553.89	2764.58	2400.47	8226.65	16020.8	9049.73	16518.1	21174.6	19909.9	12739.9	16217.8	17066.7	36983.4	42123.9	39838.8	11153.5	13919	11418.3	11364.4	12942.6	13498.1	8884.46	9806.92	9751.13	62282.4	64794.4	55414	73452.6	89723.7	72479.4	22746.2	24872.6	20743.4	20263.2	24043.8	20389.6	8017.23	7215.56
11836.3	12644.2	12283.5	11667.1	13581.4	12652.3	12244.7	11890.1	13014.1	12865.7	13597	11526.2	13728.3	11576.9	12411.2	52955.9	54142.8	62410.1	49226.6	58657	25281.1	71602.8	83356.7	47552.9	201583	229080	247111	1.10064e+06	1.10908e+06	1.12549e+06	55998.9	57992.7	63244.6	54227.7	55758.5	70780.7	536599	546439	393035	258647	276717	273029	963974	1.00394e+06	1.02501e+06	160837	168447	159206	591608	631380
11387.8	11284.3	11656	12818.4	11301.3	11323.1	11773.1	11210.9	11276.9	10954.4	12077.1	12487.3	12570.9	10408	10068	581982	533382	510398	380182	333495	328192	79866.5	73512.7	80430.3	953252	899587	840571	438596	437493	413606	449171	427086	394326	83713.7	77387	73164.8	391701	366388	350483	722284	683215	626081	520251	487875	458761	291798	284234	267222	155131	148801
259.808	0	139.06	120.401	177.439	133.437	269.808	0	0	0	288.105	131.538	0	126.281	123.542	7415.33	6125.89	7297.27	20433.9	18947.9	17238.3	8750.09	9618.77	10779.7	29399.2	29927.1	30708.7	31920.3	32669.1	33323.7	7567.16	6899.4	5545.11	13042.3	11795	12154.1	30323	30264.1	31251.8	31827.4	32061.4	30106.5	36155.3	36730.9	35170.2	23025.7	21585.6	23084.9	22845.1	19601
15196.2	12647.4	10240.7	13998.5	13310.1	13199.4	12554.8	14078.2	11278.7	13466.4	12764.3	11709.7	12878.5	11801.3	11070.4	1.64774e+06	1.89598e+06	887239	1.75803e+06	2.0232e+06	2.06721e+06	572393	686036	768154	2.25929e+06	2.37643e+06	2.60547e+06	748623	1.37415e+06	1.47176e+06	779119	1.53214e+06	1.24629e+06	1.19673e+06	1.27219e+06	1.27038e+06	830812	1.13414e+06	869094	3.02613e+06	3.29466e+06	2.81286e+06	704152	783809	750328	1.75931e+06	1.86801e+06	1.83362e+06	303774	311478
3013.93	3742.73	3969.14	4371.42	3556.56	3696.68	4019.08	3526.98	4593.25	4042.18	3259.42	3310.56	3169.55	3570.97	3614.59	10274.9	12037.8	12163.8	25797.6	33509.9	29542.6	11693.2	13129.1	12725	58953.5	57137.2	56267	43128.8	39862.4	42647.3	15585.3	18320.2	15584.6	17300.1	17001.2	16542.2	40076.3	44707.6	42779.7	58159.5	65673.5	56338.1	50621.7	60933.7	59231.9	30023.9	25434.7	30600.3	27189.8	26320.1
10532.8	8641.68	7891.05	8424.66	8825.48	8769.09	8895.06	10188.7	8478.83	8867.3	8393.29	8292.27	8854.18	8598.68	8575.36	753526	833443	739365	20428.9	30057.6	19823.9	411911	437925	409768	52440.8	54276.4	48166.7	22376.7	24264.7	31279.9	408446	405590	402420	1.21659e+06	1.36112e+06	1.37741e+06	7813.11	30756	13981.9	43203.5	55313.1	61219.6	13973.8	23075.3	27674.6	26484.3	2.79452e+06	2.71389e+06	436821	408270
5190.15	4175.92	5151.41	5074.59	5460.06	5366.46	4832.45	5028.96	5649.96	5232.84	5576.23	4796.52	4931.58	5148.38	6034.16	12086.7	23237.6	26272.3	9911.28	9805.78	11371.1	588.865	2429.26	3205.44	6481.57	12145.4	19395.6	18870.3	15587.3	10691.7	30091.4	20329.2	25614	6799.42	1250.65	2390.56	15591.6	17987.7	20558.3	17623.6	17056.4	17375.5	23187.8	20176.8	20451.1	11629.4	15427.2	14630.9	10792.5	8400.09
24823.4	23548.3	24149.9	23284.5	24747.8	23576	24288.1	25627.2	24089.6	23793.7	23768.2	23285.3	22674	24642.2	21212.1	2.47869e+06	2.57384e+06	2.58056e+06	2.36591e+06	2.43582e+06	2.34737e+06	865903	874580	940007	2.7675e+06	2.83312e+06	2.94791e+06	118031	135265	134385	4.10273e+06	4.25816e+06	4.30207e+06	717917	747620	772010	2.12315e+06	2.1836e+06	2.20254e+06	2.71364e+06	2.8911e+06	2.7566e+06	507625	532373	539451	1.45237e+06	1.49504e+06	1.45084e+06	72782.6	74608.1
967.769	918.113	706.47	932.297	606.759	553.371	630.468	464.361	331.256	956.238	585.609	959.955	579.343	845.943	766.135	187169	201022	196622	9830	6083.13	8370.34	8750.63	9635.36	8795.95	11435.7	8039.52	14754.2	9577.69	10548.9	8330.71	143882	116928	124679	6119.16	4058.32	5539.06	8948.74	10117.9	8180.58	22318.1	20607.2	19836.3	12283.2	11161.7	11720.4	9606.86	9798.73	8029.07	6876.98	7745.46
338.023	326.765	291.569	322.86	655.645	294.31	143.516	813.799	301.894	137.591	275.222	315.266	356.347	1088.52	332.014	33732.8	20194.6	20041.8	1070.9	2330.79	1207.84	1569.14	1522.62	908.611	3420.07	4360.8	1125.42	1742.17	2763.95	631.234	23237.6	6620.54	12164.8	1066.38	511.067	298.536	2414.25	1947.98	191.076	8304.14	6176.72	1684.98	3143.21	2775.56	0	2506.68	1235.96	460.001	1131.74	767.188
493.136	651.357	758.994	425.059	1176.68	649.273	778.355	1267.72	359.477	285.06	646.696	598.618	882.736	1048.79	1073.88	6699.84	21046.3	11462.7	12312	9820.74	21044.6	14950	16288.8	16492.8	52610.5	47219.1	50084.9	20393.1	14521.1	41671.6	23048.1	17919.2	13858.3	14376.6	14233.4	14694.5	35682.8	39482	43220	47972.3	42339.2	9530.34	45793.7	60626.5	53158.2	29362.2	21056.8	27177.4	21555.6	18733.9
6589.54	6792.72	7381.77	6888.23	7078.59	6680.1	6472.78	6604.92	6826.4	6423.3	6226.07	6734.15	6466.91	7220.43	7375.65	28489.1	33734.6	34424.1	50588.8	59581.2	58563.9	20902	17805.1	14190	101800	114246	124027	105700	102587	107975	27159.2	28704.7	23155.6	21381.9	21478.4	21574.8	100980	112470	111962	97096.2	108851	104078	136793	147056	149929	64933.7	65804.2	64613.5	63969.5	64911.9
25282.3	25236.9	22551.8	24182.4	22631.4	23205.8	24301.8	22503.7	22858.6	24920	25916.6	23233	25935.5	24272.9	22137.1	1.30109e+06	1.20369e+06	975935	202115	222393	226433	133529	133782	133761	349256	383936	408594	390796	389593	389064	892352	760860	693386	105533	99644.7	103908	315002	346739	332634	213976	392979	368372	444912	437356	410957	272457	266211	274447	197579	188506
0	0	0	0	0	0	0	0	0	0	0	0	0	0	0	1473.48	1221.43	1633.36	7047.51	4919.54	7133.72	0	1260.81	3254.25	6658.08	8493.49	7090.37	6136.58	8379.58	7414.57	1102.34	2452.51	1681.56	1700.17	319.468	1258.06	2700.88	4649.88	5532.91	3965.58	3397.74	4235.33	13542.4	11926.5	13462.7	3760.57	5445.05	6327.76	9490.65	9429.23
1091.64	1447.2	994.508	518.153	460.805	819.998	1449.78	529.399	422.594	958.77	616.928	645.847	498.391	608.912	529.365	4426.85	6219.19	6387.2	4196.18	2260.35	3298.81	2367.83	2489.04	2167.77	7730.98	6595.94	6544.53	19896.7	22979.6	19684.3	3067.73	4339.03	4984.79	1238.16	2614	1398.64	9271.71	8357.91	7398.8	7236.39	6625.13	3083.87	27676	25344.9	17943.2	4494.75	4902.23	4201.12	5621.1	10215.7
2256.61	3846.07	3604.74	2282.4	2793.57	3082.06	3193.46	3423.8	3654.46	3213.7	4043.09	3806.65	3620.58	3131	4385.92	2173.6	3577.65	2904.02	2389.9	3670.66	2796.32	2436.69	2884.79	2473.07	2830.92	3183.53	2427.59	2708.77	2772.82	2155.89	3095.28	3347.86	3892.75	6677.48	7868.91	9253.53	1153.34	2817.58	2421.57	12034.1	15995.4	23352.8	2611.73	2327.29	2763.69	32753.4	47068.3	59498.3	2874.01	2488.38
0	0	0	182.544	221.706	0	0	0	197.049	181.209	318.996	0	205.754	0	197.51	639.654	479.883	1297.96	3453.17	3202.91	4487.91	610.992	337.122	359.823	5371.57	6841.75	6663.81	3928.42	2450.81	4570.61	1235.11	799.372	818.671	1568.81	1170.76	661.762	3745.57	5152.61	3624.78	6136.51	6417.61	5457.26	5998.65	5636.94	5590.89	4080.65	3180.04	3264.93	2900.65	1770.2
183032	150686	144656	168720	147416	137481	183770	164333	121901	169769	143099	131157	160248	142312	126050	387336	393186	365130	258191	239587	250808	490508	577794	480090	1.35767e+06	1.15093e+06	1.01454e+06	2.5325e+06	2.2472e+06	2.67961e+06	433859	472341	442046	555049	1.04901e+06	560568	1.60433e+06	1.4993e+06	1.62075e+06	1.41888e+06	1.61158e+06	1.42359e+06	2.40084e+06	2.17525e+06	2.0754e+06	712471	1.03431e+06	783029	1.18988e+06	1.48508e+06
39070.4	43389.6	43406.4	42632	43959.2	40819.1	41244.1	38475	44093.8	42925.6	45159.4	50162.3	39823.5	41903.8	48135	151633	269767	265984	867549	1.10664e+06	1.12892e+06	654796	908501	925547	2.1787e+06	2.61625e+06	2.62579e+06	178765	229855	286596	69917.9	74071.7	58206.7	35108	37054	36694.1	225401	305319	356122	95704.9	118954	135475	70286.5	44117	72577.6	150684	193117	177735	22920.4	55029.5
23112.6	20575.9	19592.8	19401.8	20653.4	21821.2	23007.5	20074.7	17436.3	24578.5	17771.6	19689.1	20604.2	23048.9	17336.8	161347	263285	226536	76254.8	120447	110042	104441	90436.8	88026.4	200810	328639	13799.1	138330	134395	136462	123376	152692	159743	100569	11465.7	86606.1	87959.8	66459.8	73318.8	161281	210764	110657	52098.2	136195	54983.5	88327.7	54670.3	136099	78526.6	75555.7
315.501	350.398	0	534.126	534.398	0	282.535	784.582	0	588.566	263.553	320.242	287.316	654.614	0	1666.12	342.927	593.55	724.288	712.703	1454.27	824.542	399.629	373.18	1805.25	383.302	0	1414.14	786.604	2371.72	340.672	656.994	714.634	433.3	1071.29	0	348.269	1188.08	850.104	358.332	1052.86	305.464	18248.5	20587.2	19299.8	344.445	678.803	338.011	2907.68	2599.06
0	0	0	0	0	0	287.246	0	0	0	297.796	0	0	0	781.823	0	289.317	0	0	350.721	0	359.674	0	297.179	0	0	319.05	0	310.697	0	265.115	555.229	0	0	0	0	0	0	0	0	0	287.687	0	0	0	22875.4	25619.2	25283.6	48813.8	53284.9
2522.62	2071.23	1677.76	1548.12	1489.95	2031.49	2915.98	1304.72	2052.53	1479.51	2791.65	337.54	2147.84	1975.55	675.907	3611.37	7899.48	6218.33	3255.83	4317.67	5000.4	767.902	3636.61	3628.9	2730.19	4647.84	3085.75	32159.6	29000.4	25393	1725.41	3539.22	3818.82	1631.13	1462.73	2090.94	1487.11	769.805	1884.86	1972.22	1064.44	2556.9	56712.3	60833	56635.9	0	2988.11	2280.15	82817.2	83250.2
0	626.601	0	0	0	133.7	0	0	381.686	134.505	407.415	286.794	0	455.89	0	35334.5	37905.3	52865.9	4373.92	4176.63	4154.95	469.644	634.696	459.681	6053.99	5418.71	5965.06	4152.55	2685.98	4307.8	12732.7	13612.3	13912.8	1113.33	2218.15	1833.32	1826.38	2170.14	2455.01	7060.17	7662.76	8182.62	3818.75	3477.89	4928.41	3092.58	3777.74	3889.14	1479.2	2390.5
0	0	0	118.004	114.696	0	0	126.693	117.431	0	394.92	0	0	129.402	0	39005.6	35244.5	24394.5	20331.6	18204.6	16632.1	19509	17649.3	16557.7	29442.3	28551.2	32950.3	252176	248732	150740	22579.3	23987.8	27083.8	2036.03	1958.69	1914.98	8181.53	8106	9047.06	10667.2	9546.09	9313.65	490512	848895	460387	9136.92	8620.19	7590.18	1.09498e+06	1.15898e+06
7999.47	6653.77	7666.46	7525.7	8025.87	7557.8	6813.83	7365.45	7412.45	7494.97	7584.89	8011.95	7109.97	6688.11	8139.61	699832	740578	697661	410601	403359	387685	63170.7	58998.7	62096.4	597218	612402	583330	22694.3	25536.6	29146.5	117512	123467	106337	99774.1	99937.6	90683.3	264459	263010	237481	405345	400767	375927	69464.7	71076.6	64257.8	174729	180478	159208	9017.48	9401.52
121165	140185	143739	128372	139902	141858	128941	134407	141452	129037	130889	133487	131624	137008	140601	11707.8	7067.15	6497.25	15303.8	14373.1	16794.2	5544.53	7439.45	7764.66	7263.15	9365.89	6071.86	19346.2	15273.4	17192.5	7032.46	11821.3	10967	10172.5	7479.99	10447.4	6316.71	8595.06	8296.23	12619.7	3859.79	11534.1	11977.8	17237.3	6459.83	12272	6002.67	9217.99	4644.46	7496.22
5162.68	5660.6	5942.14	4787.42	5560.52	6004.9	6187.64	4936.01	5253.48	6181.23	4763.66	5646.5	5665.34	5579.99	5681.57	193496	223482	189399	190665	177698	22640	48956.3	60851.8	70108.8	377027	12984.1	15735.1	131166	134395	128124	155084	148805	133376	36378.1	38930.2	32557.7	34167.4	44304.3	50791.1	15928.2	14103.9	23477.8	258574	245089	240406	14624.5	15685.1	14581.8	63362.3	64567.5
7826.2	7880.86	7479.21	7221.87	7297.89	7453.82	8024.16	7430.1	6771.37	8219.15	8301.84	7735.52	8081.54	6668.37	7737.33	699969	662715	619677	814984	770381	762863	95549.5	96885.4	94136.5	975705	947833	901209	260646	272390	263583	395160	376037	358313	109219	106791	103324	471910	467425	443097	573570	554072	531450	330741	310911	294633	251160	257298	244909	67607.5	68669.4
8739.34	6560.49	6357.71	7171.6	7195.54	6601.76	8804.18	8174.16	6485.18	9397.02	6848.24	6866.36	5686.96	5358.48	7626.47	20149.2	16284.4	17439.6	137331	156953	163255	39240	40646	32812.5	246623	312603	290862	151159	166856	180636	35968.1	37082.3	20266.6	52262.6	55097.1	56170.6	148644	175329	132267	205423	219940	225247	221999	224766	235347	135839	144357	124554	78049.3	65558.7
23912	28200.8	25935.2	25094.7	25496.3	25568.3	26736.8	25752.2	23915.3	25252.1	25791.7	26311	24861	26244.4	25981.1	27788.1	30643.9	28330.8	26990.5	27254.7	25558.2	28698.8	29948.1	27900.9	28807	29373.6	28704.9	27921.1	26878.1	26244.6	31702.2	29739.8	30690	27289.4	27671.8	24194.4	25989.9	25057.1	24064.6	26152.2	25574.4	25810	29736.8	32308.1	28041.8	25958.7	26214.9	24592.9	24475.6	25040.1
2456.03	2250.15	1418.83	1480.52	2271.14	1164.92	2036.87	1606.82	480.675	1537.31	1218.61	913.293	1334.52	1131.54	745.172	8624.49	8385.27	8403	20995.8	20404	19849.1	21309.5	24257.7	20935	17725.8	17757.5	19304.5	20988.4	20128.5	23584.8	21051.2	21361.9	24218.9	28329.3	21636	22474.6	21892.1	22722.8	20215.6	20560.2	17577.9	23955.6	3367.71	4004.18	3844.93	3776.01	4161.24	2925.67	3770.84	4304.54
11213.8	11145.4	10436.8	9708.61	11405.1	9931.46	10282.3	9553.66	10217	10570.5	10033.4	10721.4	9549.22	10577.3	9332.63	23156.7	21448.6	21720	38189.9	40574.3	34419.5	27333.4	24892.6	25281.8	64460.7	68750.5	71577.6	92432.3	98658.9	103743	16973.1	18216.7	18264.2	20333.8	22027.9	22488.8	84958.5	98230.8	96768.1	67349.6	72468.1	53516.8	177235	105755	178744	37611.2	47440.8	48945.1	74946	82633.4
4272.89	3406.24	2720.46	4101.53	4175.04	3435.39	4203.35	4158.22	3770.91	4516.45	3256.24	3094.12	4386.58	4024.33	3314.45	30447.7	1.52024e+06	1.9169e+06	97379.3	6095.55	97852.6	132918	159739	134127	163015	171602	139498	156347	138117	136547	490958	497590	1.64339e+06	101148	91465.9	86117.4	153927	137559	119192	412024	13814.6	57635.9	171907	154921	121970	147102	138454	138639	108686	106514
614.534	0	0	0	0	0	0	0	0	0	0	0	0	0	273.239	14991.8	10147.6	9730.23	12230.2	41800.5	43113.3	9795.62	10037.7	8595.53	39228.2	37397.7	32261.5	12589.3	15641.4	22944.1	6132	8895.02	8421.4	6922.07	5859.58	6506.71	19618.9	15112.7	19079.3	20827.7	20821.1	16422.5	16187.4	15992.7	17109.7	22269.7	23165.5	20233.3	22302.2	13955.7
330.797	305.207	298.033	243.423	0	0	382.744	0	223.481	780.769	0	0	278.506	312.699	843.097	3456.81	1745.14	2161.94	16796.3	14039.8	13735.9	3301.69	1244.18	3117.82	13413.2	17091.2	13906.5	8171.19	4704.4	5788.74	2143.14	2443.28	2084.2	2449.21	738.272	594.64	6930.15	4832.02	2143.99	5725.35	4278.89	4618	6175.79	3754.86	4193.54	6720.59	2147.62	5734.9	6267.4	4833.84
7793.1	7294.61	8034.51	7712.57	8390.94	7744.45	7777.09	7574.27	7360.69	8091.06	7517.93	8197.33	7642.28	8010.34	8176.39	5956.54	7575.36	6563.12	33465.3	33516.1	36557	15964.4	17473.9	14697.8	78020.1	76955.6	81081.9	184271	177533	189687	6783.42	8195.13	7550.01	19173.9	18537.3	24717.5	145950	145393	143359	112663	128374	119487	223722	220913	219526	76388.6	78386.6	84762.6	107147	122081
2151.39	1062.5	2189.72	1883.66	1020.28	1826.83	1929.5	1925.59	2030.62	1202.26	1292.06	1228.17	2065.51	1473.82	838.993	1086.5	1419.52	1187.22	764.083	632.946	762.989	1601.26	1086.51	872.791	1456.09	1277.63	618.552	11218.7	10614.3	10184	1406.8	1352.81	1800.3	1204.33	564.783	794.963	771.564	2137.33	827.293	635.829	1452.36	519.717	1812.62	1682.15	835.402	897.305	1023.78	1608.41	972.246	1835.95
5467.62	5214.12	3985.89	3511.81	4317.74	4144.37	4788.53	3536.61	3029.31	3957.51	3844.94	3311.53	2830.15	4221	3584.65	148314	67730.7	186334	24766.8	33065.1	26823.6	21033.1	21586.4	20415.9	39678.4	22633	42433.3	18570.9	17466.5	19281.2	42662.9	126173	45513	18365	15876	15498	26657	26891.9	29207	30808.5	30060.7	28815	17746.5	20315.5	19179	15898.7	16145.5	17809.5	9043.29	8606.45
15033.1	12727.8	12139.4	13686.4	11719.2	14478.8	14124.7	9682.76	14306.3	9697.86	14490	14551.3	14465.7	12370.7	14065.8	0	0	0	0	0	0	0	0	0	0	0	0	0	0	0	0	0	0	0	2064.21	3073.49	0	0	0	0	0	0	0	0	0	0	0	0	0	0
4381.21	5947.71	6834.52	6479.88	5981.53	6758.61	7393.74	5894.63	5176.92	5878.17	6166.05	6641.65	6215.86	5102.96	6108.27	14902.4	17546.2	16391.9	190787	180520	188091	22581.2	21885.8	21080.1	182773	169573	194012	31610.3	30057.1	31447.4	12354	12414.5	12231.9	21026.7	23194.9	22444	105257	107906	101825	115998	116998	117918	45706.4	46238.1	46675.5	105223	112486	102229	28720.4	30764.4
13541.8	13719.8	14066.7	14275.4	14217.9	14725	13689	13103.2	13651.4	13459.3	13079.5	14438.1	12737	13727.4	13312.9	9301.57	9818.05	10280.3	12883.9	21108.4	16335.8	10345.5	11195.3	9510.63	36505.5	37881.6	19816.2	89141.1	79704.8	55311.6	9156.63	11742.3	10437.4	15141.9	13563.5	11527.5	74463.8	67277.8	19638.4	61187	45423.6	15769.6	117617	96283.6	45649.1	41439	34053.2	21412.8	52420.7	45713.7
2803.15	2932.19	2893.1	2158.95	2208.89	2679.61	1487.2	2063.03	1933.69	2072.4	1716.18	2184.08	2058.94	2691.43	2691.3	10047	10210.8	10136.5	4778.01	4251.24	4510.33	2810.99	2576.18	2827.22	7504.57	7895.65	7277.99	5434.39	4937.69	4581.74	10234.6	11536.2	11689.5	4871.82	5144.34	5336.6	5643.7	5755.41	5989.85	5602.81	6233.48	4753.11	11795.7	11697.7	11576.8	3845.12	4011.96	4704.56	4478.81	4009.84
73560.2	52926.5	46616.1	57683.4	47763.2	47392.3	55942.5	52800.4	44176.8	54236.5	52286.3	42594.2	51120.9	48039.6	44571.9	33153.9	25200.8	28381.3	42962	40652.1	35830.5	4.42106e+06	4.38014e+06	4.23083e+06	50303	44479.9	51121.9	5.67326e+06	5.85054e+06	5.48407e+06	17600.8	15336.7	17115.3	2.34814e+06	2.24312e+06	2.21035e+06	71430.3	76044.9	75006.1	33932.3	50547.3	50155.2	29278.7	47848.1	47750.2	12639.7	5.96911e+06	22768.7	3.36708e+06	3.40243e+06
4617.26	4169.54	3617.81	3611.39	3648.96	3895.5	4139.04	3421.34	4123.04	4211.28	3416.38	3517.75	3540.79	4706.65	3450.21	25074.8	39217.8	18058.4	7123.04	7141.29	7198.77	6048.91	6361.41	6209.58	12504.5	11204.8	10483.4	7521.4	7762.19	7183.24	22654.8	17422.8	95951.3	5241.56	4837.55	5097.87	6406.7	6337.34	6463.12	22917.1	23355.3	18500	8316.43	7759.23	7902.97	7139.36	6368.98	6957.99	5593.42	6035.47
11409.8	9394.83	10102.2	10744.1	11492.5	11493.6	12479.6	10055.7	11511.3	10315.3	11474.2	10835.6	8740.99	11943	10119.3	21934	24307	21963.8	39088.9	40899.1	37437.2	37429.5	36541.8	39299.4	73370.2	55647.9	71553.3	298885	297659	277873	25430.1	28090.9	27425.1	27792.9	27517	27859	141891	69850.9	111657	78929.5	80714.8	81302	243241	229253	227040	60815.4	55318.1	40123.4	142116	139623
582.385	0	0	0	0	0	267.143	0	375.133	584.699	325.373	0	546.398	509.223	0	38264.9	40181.1	40830	24684.6	32397.3	12818.1	22624.6	19716.1	22620.6	31815.5	27321.5	27262.2	139269	77369.5	125894	23005.3	22588.9	26442.4	10223.1	23680.9	16369.3	7021.97	8729.73	9822.29	10540	13524.3	11098.5	323952	333557	333922	15221.5	17227.7	18737.6	457581	545023
285.895	0	0	699.662	638.239	0	0	405.253	0	0	0	0	0	0	0	8098.42	6472.11	6815.8	821.694	4585.72	2634.28	1123.72	0	463.492	1676.86	1231.24	1089.67	0	1204.54	509.471	9186.08	10501.5	8472.62	1560.27	396.639	427.649	1634.99	0	2122.06	4308.04	2125.91	3824.11	5047.74	3078.37	1660.1	531.651	0	429.167	1153.48	1487.75
7045.69	5879.98	5897.91	6896	5564.83	4618.17	7533.53	6167.61	5950.38	6952.84	6551.46	6472.17	5846.07	6911.38	5170.25	2.13544e+06	2.16337e+06	2.09581e+06	1.43686e+06	1.41716e+06	1.35954e+06	422780	423713	444708	2.1257e+06	2.16404e+06	2.10653e+06	1.60556e+06	1.65514e+06	1.59943e+06	1.87503e+06	1.87704e+06	1.89308e+06	471134	477046	483046	1.57687e+06	1.53383e+06	1.3372e+06	2.57884e+06	2.61327e+06	7772.91	1.71725e+06	1.65494e+06	1.60841e+06	1.28833e+06	1.27236e+06	1.3546e+06	605795	590297
3834.02	4224.18	5055.46	4041.15	3488.42	4797.88	3454.21	3897.73	3845.26	3935.08	3621.06	2994.72	3780.6	4066.67	3788.5	549608	607769	551555	649391	670392	680532	74263	84527.8	81045.6	799681	820385	786504	242002	251627	251484	331668	322103	338226	101086	102547	102522	453446	458196	415349	496811	489363	484507	298599	309257	297240	255092	256102	248338	71234	67213.5
6373.77	5787.99	6500.97	6309.68	6684.34	5683.91	6892.15	7459.7	6533.38	7371.49	7300.66	5766.56	6719.93	6881.93	6220.5	25250.3	26460.6	42644.7	146683	140174	141658	92895.1	55702.5	49995.8	375014	393503	398098	372819	375447	371521	44946.1	39342	89634.6	71464.9	75287.3	79174.2	326670	353994	316029	356167	531092	366342	413842	426449	408158	202859	195837	209822	152192	158581
59391.4	60581.8	56837.4	63057.6	60616.5	59026.5	64474.9	57425.9	53787.2	59066.9	58764.2	50491	61655.4	52849	52592	76546.9	79040.4	80275.5	414060	407363	420503	117438	100920	124463	551489	553250	654061	79161.1	72831.2	87374.9	39184.3	23894.9	30696	179477	22668.8	34968.2	2.01855e+06	2.10442e+06	2.17986e+06	550990	401128	872701	92334.8	124527	121625	135074	163904	191678	38808.2	36756.5
51166.7	50248.6	55074.8	57472	49643	48776.7	52520	50708.4	46133.3	56710.4	53771.1	48035.5	53328.7	54232	44806.9	955886	857865	894640	23531.9	79565.6	68394.6	235830	48361.8	51006.5	125758	631390	640692	31899.9	41134.1	38325.3	827059	736909	7918.59	17985.4	20526.2	15482.3	112748	91000.6	74832.5	120850	108339	104126	13177.3	17248.5	27121.8	26409.5	38047.9	29697.9	104322	88888.8
2624.81	2568.19	1658.56	2155.74	1990.13	1387.13	1717.8	2105.26	2635.78	2863.22	2541.42	2339.43	2129.39	1716.28	2003	21718.9	91418.6	89252.8	10798.3	40875.9	36384.8	18935	14838.8	15246.2	52934.3	52024.1	57289.1	210443	410609	496038	4638.95	8125.29	57541.3	22999.4	28985.2	28344	14874.8	12168.2	8596.6	17116.8	20312.9	2535	142461	127975	54736.8	23146.6	20007.2	16945.4	86906	120556
10704.2	7316.34	9004.7	7870.42	7640.76	7808.09	8476.65	8044.25	7989.02	8025.07	7852.36	8371.82	8436.36	8357.35	7671.84	20816.8	23488.5	18184.7	10223.4	25171.1	21932.3	11787.6	9845.01	8980.08	83694.9	97227.8	93295.1	69442.2	60978.1	48661.9	39585	36861.5	29367.8	11839.1	9457.76	8892.12	49738.3	55467.2	33671.3	38841.7	36306.7	26452	403527	413315	401834	19585.4	16703.8	16105.3	33158.6	36249.4
0	114.89	123.465	0	127.984	172.47	136.215	387.635	250.653	0	219.321	0	280.465	0	0	0	184.217	0	527.836	643.365	0	0	0	0	213.793	1222.18	924.349	148.989	664.698	339.104	0	0	0	0	0	0	430.637	409.06	377.091	352.61	1511.17	360.344	815.106	1492.4	526.168	0	518.111	0	321.668	348.143
466.645	9751.78	33670.6	0	25352.3	33242	254.942	49250.8	27891.1	10107.3	35325.7	28483.1	8041.6	34544.1	27123.2	3885.21	800.649	467.876	2433.38	654.078	243.838	767.706	263.704	0	308.522	0	314.941	0	678.833	304.035	879.724	0	520.596	458.867	0	239.408	335.981	0	0	220.768	0	250.555	0	303.679	0	275.239	0	0	277.497	0
26508.5	24272	24862.7	23578.2	24427.4	22169.7	24383	25724.6	23890	24908.8	23538.6	24412	23189.9	24274.6	24408.3	322178	379249	321462	334157	292298	288329	164131	167011	140952	532376	483495	533461	383704	393002	369432	230992	235747	223431	105343	114607	124376	454437	409627	381692	445916	391067	394194	416442	479577	395464	180068	232683	192297	168300	203086
1515.43	366.304	153.769	467.321	525	703.112	811.698	132.551	147.229	420.593	198.26	641.009	432.557	457.466	678.401	182597	180726	175120	11923.5	11441.6	10993.8	10521.1	10209.6	10170.5	18476.3	19133.7	15914	11592.2	11610.9	11065.9	131603	132196	124146	6745.27	6128.23	5661.78	10971.9	10835.6	9362.08	36758.3	35648.4	31520.4	14745.9	14200.9	12818.5	12386.9	12044.6	11096	8277.92	7686.54
19929.8	17482.6	17386.7	19619.9	18531	16349.7	19110.8	18318.6	16223.5	20754.4	18815.8	16711.1	19069.1	17688.5	17064.7	71117.5	74567.6	72029.9	16667.5	17082	4.53565e+06	1.54347e+06	1.55398e+06	1.50658e+06	22200.3	23112	19384.3	2.53935e+06	2.63544e+06	2.51028e+06	56115.2	56390.4	56250.9	2.24267e+06	2.24719e+06	2.10443e+06	2.69706e+06	2.73765e+06	2.4794e+06	23641.6	24284.8	23572.7	2.64776e+06	2.67816e+06	2.39338e+06	3.30099e+06	3.2873e+06	3.07954e+06	1.304e+06	1.26871e+06
31217.7	57718.2	313684	39095.6	93599.7	852560	50081.7	192965	289271	57099.4	300383	289611	54769.9	329964	386612	48524.7	16702.9	1722.26	45435.9	6138.01	3525.23	40134.5	3593.18	8514.75	40885.1	1369.24	11841	35726.1	4829.89	15004.7	37031.2	11206.8	14346.9	35209.7	0	16083.9	30200.7	0	18781.8	28422.3	4304.33	22128.1	26402.2	0	25296.3	25915.4	0	27829.9	27336.3	821.311
303.112	273.42	291.815	444.736	828.043	612.208	144.738	0	839.118	158.69	229.457	416.487	142.277	701.404	461.461	20666.6	30424.5	27413.8	20386.7	23672.6	14413.8	15200.1	19939.5	29635.9	19814	35927.4	64842.9	14988.7	23100.7	24972.9	21307.6	13441.6	38151.5	8675.94	10150.9	14812.6	27374.6	60930.3	90267.4	29766.4	11598.1	53635.4	30461	50929.3	100079	18287.2	23086.6	28446.5	13966.6	20244.3
1111.25	786.159	1017.57	1270.33	1065.54	1169.57	1367.79	1468.98	1183.6	1119.97	372.563	963.637	958.374	1063.85	817.645	10413.1	10932.9	91283.1	10602.4	122959	7767.99	104735	13529	106174	105447	96255.9	13257.1	92798.2	100219	4474.02	11615.9	5470.89	93495.4	7133.8	83156.7	6564.72	116973	102897	93609.5	7835.09	95828.5	10305.8	100127	88737.1	76457.5	112399	93985.6	4065.7	85745	98931
0	16001.3	51491.2	0	7266.9	54855.7	0	48218.3	44503.6	9734.29	35205.7	48717.2	9248.21	49176.3	21733.8	0	0	0	0	0	0	0	0	0	0	0	0	0	0	0	0	0	0	0	0	0	0	0	0	0	0	0	0	0	0	0	0	0	0	0
15000	16645.4	14068.9	14869.8	15338.3	13841.9	17054.3	15768.4	16060.5	13836	12738.3	13118.7	16520.1	14065	13921.4	13698.6	7438.45	12659.4	14303.8	10048.5	14538.2	18355.3	17399.8	19626.6	11143.4	11159.1	20640.2	13201	20654.3	25096.2	9210.79	9065.12	9657.9	15102.5	8969.34	5480.74	49260	10053.7	13160.1	10605.2	11169.8	11149.6	9399.31	12777.9	14258.9	11467.1	15674.4	24956.8	16521.2	14772.8
4830.25	3787.31	3320.13	4762.08	4119.79	3367.42	5039.04	3484.67	3488.62	5102.13	3376.16	2661.16	3943.44	3535.55	1874.3	22262.6	27649.9	18916.4	35104.9	31668.5	28042.9	11010.5	9314.42	9309.25	92761.7	95552	83821.7	21542.6	23051.7	18458.9	17945.6	27479.8	15863.4	8314.05	7594.76	7567.96	42856	54490.1	51085.8	55951.7	63294.1	54496	73694.5	66439.1	53279.1	23601.7	23582.4	18605.5	16306.1	16566.3
119484	136649	119006	106826	117114	102740	116483	120809	128977	137793	114344	128362	102503	108831	128790	229459	101989	109901	148009	136487	101231	121335	99482.3	125236	132949	60357	113933	119208	315201	89507.9	130970	125656	122488	142632	145910	136096	1.02564e+07	675212	113573	258953	90427.8	140623	129836	164913	119494	2.85465e+06	114075	103487	118285	120909
0	0	179.894	0	0	0	355.077	0	0	0	198.927	185.321	0	0	0	407226	376532	237990	268064	260888	197435	376863	343309	292116	253427	248846	247702	96496.4	301559	192091	463848	408492	299393	504489	417626	353518	382528	241265	178525	359431	256669	314362	0	0	162.074	0	0	0	0	0
7915.55	7020.24	7578.71	7760.67	7150.99	7641.04	6436.38	7575.66	8645.55	7714.31	7147.66	6241.22	7771.01	7996.05	6081.3	32811.8	25160.3	29378.9	50985.2	40824.8	62671.6	72713.1	70605.4	89833.2	41492.3	40259.1	39443.4	72670.4	69457	63643.8	76447	67423.2	85844.2	93187.7	98573	97196.4	73310.9	57674.5	68568.2	62071.7	59796.4	66113.5	14716.1	15800	14765.2	13181.8	12630.2	14450.5	24247.9	23050.5
7285.64	6387.47	7246.63	7313.29	7518.86	6722.7	7535.07	8326.69	7417.98	8391.28	8144.05	6523.01	8117.05	8116.63	7306.3	52036.2	56629.5	55023.9	119969	21177.8	136869	55005.9	56753.4	58581.7	340655	7242	28790.4	345145	361196	357677	60565.4	59223.1	52427.5	31614.3	37565.3	39088.8	311842	318585	319993	29577.4	43243.3	52885.7	411892	411473	424719	63279.6	49941.3	65082.6	148878	151967
2349.75	3660.52	2406.02	3682.12	3880.6	2906.87	3145.53	3094.51	3521.74	2983.89	3451.46	3977.33	2945.89	3316.89	3402.37	3449.17	4018.97	4116.56	6813.84	6200.48	5939.98	6078.91	5823.02	7392.31	10101	7451.8	10559.1	16585.5	20149.7	24113.9	6301.98	7704.97	7662.19	8366.79	7727.56	7136.43	18397	16430	17250.1	12038.2	14987.6	17487.3	25122.6	25221.9	15802	15690.1	15841.1	16275.7	16805.3	15755.6
275.482	0	0	0	0	0	0	0	0	0	0	0	0	0	0	0	1687.45	1747.8	0	615.841	862.811	302.116	201.967	313.424	11678.4	12420.7	13281.8	478264	506212	360059	10057.9	11882.7	11183.3	647.982	1789.98	767.805	1203.24	2613.94	1787.39	0	609.912	1066.13	121388	126093	149177	3927.84	3560.03	4122.76	147068	126507
1182.94	1646.1	1336.76	1124.23	1470.43	1080.31	1207.33	1346.59	2090.48	1069.13	1760.24	1238.99	1632.4	2132.97	1444.78	6137.99	6503.61	6598.68	14184.3	15098.1	16740.1	11877.3	17687.6	15068.6	8756.94	16035.3	18946.1	15186.2	13864.6	12067.5	15616.4	15239.2	18087.4	17188	19157.5	17267.2	16753.6	15464.3	16829.9	18193.8	16917.6	17981.1	966.936	897.294	1880.85	2567.02	2098.98	1354.88	4415.49	3795.44
14118.9	16654	16147.6	14313.1	17712.5	17109.5	16468.4	16915.3	17263.1	15421.4	15634	15625.3	16074.1	15436.2	16049.4	1.06466e+06	1.1504e+06	1.04299e+06	211566	224550	212818	42477.4	42810.2	39477.7	309462	309741	314021	91548	93678.1	86995.4	825784	820572	823045	76564	80496	70956	95879.3	100397	91391.5	309824	328223	294645	97676.4	95279.7	88974.2	141588	133469	127973	33618.6	33085.3
8186.2	10161.9	10124.3	9223.09	10288.9	9725.24	9098.31	9384.89	8795.63	9066.53	9523.11	9712.26	9761.59	9823.5	8615.35	12578.1	7830.11	7483.5	36725	34435.3	34136.7	17796.2	15799.9	16083.9	70209	72317.8	68732.5	160693	9080.61	13295.9	10630.7	8914.21	8885.79	27501.2	26920.6	27247.4	131976	125765	9015.72	107402	101636	110141	8111.59	18923.5	8886.11	68542.3	8241.78	72741.8	107716	9316.41
0	0	7870.96	325.122	0	8085.79	312.868	1400.52	6639.49	0	3193.42	4771.53	674.984	7049.95	3640.06	1121.22	1576.49	1368.89	12606.5	15131.3	13742.8	1473.65	2244.64	1190.88	16415.8	13871.7	17797.1	7121.21	9366.01	9253.15	2154.06	2064.77	2890.57	3033.19	1715.84	1432.76	7362.43	6294.66	5522.51	7231.32	8708.41	9193.77	8189.14	8532.29	13468	10344.6	10720.8	10331.1	12081.4	12852.9
4948.24	5000.61	4306.53	5601.31	4293.35	4288.68	4579.65	5392.87	3929.78	3791.1	4015.19	3634.93	5716.32	4354.49	3374.52	21756.9	13483	25400.4	98269.6	91121.3	82478.9	19004.3	18404.3	21543.6	68842.2	160880	104455	6880.97	6993.72	5904.82	9434.64	12855	11869.7	7785.86	9667.9	8551.01	23507.3	21921.7	8037.68	23032.8	33044.5	26428.2	10224.1	7815.14	7630.21	43397.3	25173.5	42613.2	5739.71	6658.47
5050.62	4992.61	5273.46	5993.38	5273.36	6374.13	5517.1	6341.47	4930.35	5912.17	5525.14	6060.01	5722.09	6343.8	5647.21	50882.1	62931.3	66348.7	290927	198528	188747	70201.2	78603.6	72887.7	453024	446788	478652	464017	501213	488938	46501.8	62295.7	64605.9	103994	106299	112807	409290	471426	400356	458049	505809	539006	547197	574564	514663	262267	315503	277702	204939	204781
2431.78	2674.37	2099.28	2736.08	3596.49	3236.16	1857.51	2528.28	3107.91	3386.32	1801.79	3006.84	3288.64	2731.95	2475.12	111649	114279	95895.4	126912	143712	121375	50989.9	56653.2	50705.7	54843.4	61621.3	46631.3	194328	203765	194147	231909	223585	208746	250442	240203	224734	250320	231567	230358	252908	245142	203552	6291.56	6506.66	5494.45	9005.71	7819.77	7266.44	12044.2	11271.3
10818.9	13308.8	12268	11615.9	12170.8	11189.3	11166.9	12063.6	11208.7	12647.5	10780.4	12362.1	11894.3	11957.6	11091.4	15849.9	14667	15598.6	15556.4	16159.5	16364.2	15306	13737.3	15534.4	20167.1	20085.7	19310.5	15984.6	17590.4	17944.9	14670.7	14714.7	17756.1	14241	15671.5	15388	16517.2	16516.1	16663	18072.1	17785.7	17476.2	17568.4	18089.3	18582.4	135978	152169	150854	209866	173906
2106.72	1720.07	637.18	1000.73	1431.5	1540.6	2250.75	1749.12	1101.8	1106.7	1640.72	1839.59	2089.99	1017.07	1543.3	24521.8	29518.6	25930.1	65737.5	50117.7	69337.8	20671.1	18013.7	22666.4	81507.5	30424.7	109980	92495.7	111327	73389.3	28287.2	32309.2	21797.3	24562.5	16400.9	18833.6	82662.3	33678.2	44226.3	116873	142048	125045	54803.6	87509.1	97490.9	30482.8	34252.6	33923	19960.6	45313.1
5647.13	4620.74	6420.49	4666.94	6329.55	4773.38	4608.87	5509.23	4386.08	4599.3	4708.2	4539.42	6326.2	5490.4	4284.29	37723.3	36754	37898.5	109592	77782.1	43667.2	17172.7	18198.9	21816.7	192698	147723	137181	83290.4	87586.1	89696.6	22468.1	18952	20945.1	24148	21701.5	24083.3	75600	75843.6	75388.1	85354.4	91219.5	88597	109385	113260	111409	48037.4	53590.9	49043.8	56786.9	54173.2
5365.13	4758.78	5027.36	4908.6	5495.45	4905.98	4615.18	5324.28	4423.26	5288.16	5514.58	5454.23	4963.85	4158.23	5435.61	214.293	1040.17	894.425	666.411	0	474.457	24653.5	21013.3	18402.5	239.799	865.743	1340.16	918.284	0	1258.77	739.953	6420.22	3951.62	264.706	0	547.726	0	0	0	1341.26	1475.73	0	1966.34	777.804	2461.96	0	978.61	367.067	2180.6	371.215
0	0	0	0	1780.39	250.764	0	0	258.461	0	340.727	0	0	404.025	0	510.625	0	0	0	0	495.144	36969.7	25532.5	22993.4	4730.45	6741.96	6682.89	73935.1	5411.85	71804.2	0	0	0	0	0	0	5438.05	8113.44	5988.15	267.117	0	0	3915.85	3944.86	3124.55	0	0	0	0	0
0	0	0	0	0	0	0	0	0	582.928	0	313.615	249.614	0	259.236	1070.78	1388.32	905.021	4329.08	785.444	917.61	3366.21	1079.02	3983.87	1859.65	4955.42	708.101	1985.52	1587.44	0	0	0	367.367	440.355	1454.65	1103.82	909.63	1953.25	2511.68	408.091	831.986	1408.18	2014.95	3417.97	893.618	28309.1	40968.2	36060.1	58733.6	62834.6
9542.73	9589.29	8429.43	9044.52	10045.6	8679.04	8937.48	9006.98	7741.7	8825.44	9152.49	8021.85	8539.67	8739.51	8561.74	11328.4	11069.6	10816.9	32053.2	35584.8	36268.5	12943.4	13624.5	13998	32288.8	46717.3	45606.7	39049.3	22113	42108.4	9975.07	9817.47	10312	20894.3	19934.8	19099	40227.7	38367.2	38219.9	37592.6	44214.6	45503.3	40366.5	36876.2	41572.2	39994.6	33501	27893.2	29321.5	28595.1
3805.77	3396.55	2930.98	3132.43	3506.19	3614.03	4748.29	3498.8	3786.73	3601.05	3619.07	4648.39	3879.64	3885.56	3177.22	4552.58	7243.53	7298.2	14246.1	16983.5	15971.6	10782.2	11057.4	10652.9	22839.7	26866.7	36518.4	45487.7	31345.1	35879.5	6760.93	7428.93	8071.6	8860.69	9580.19	11498	35756	31835.4	33978	17568.9	19991.9	17519.9	48652.3	38906.1	54300.3	20842	20811.4	22294.9	18512.7	20476.9
17649.6	16416.8	17627.3	17402.7	14186.2	14349.5	19259.7	17906.9	13547.1	17158.9	16530.2	16793	16804.6	15676.2	16268.5	53870.6	54201.3	66790.5	80197.4	87070.8	83077.9	48595.3	47271.7	56489.1	131638	146464	97151	127754	123832	118214	56052.9	84172.2	60802	45331	52634.6	51023.9	93297.8	107926	109488	93647.2	112144	86927.4	726726	875710	864254	568048	671499	773616	445422	851200
4653.09	4742.49	4160.47	4877.93	4129.15	3746.07	5113.56	4862.29	4168.75	4289.99	4336.88	4487.29	5005.7	3853.45	4534.63	43366.5	45969.2	24251.6	9864.89	9757.77	11422.9	10729.8	10962	10430.1	11147.7	13047.1	25588.3	37468.3	38624.5	24489	16636	7617.85	19011.7	12100.1	11622.4	8256.37	24066.2	20037.5	12270.8	27403.6	44858.5	29589.2	40674	35685.8	10665.7	13777.2	24658.3	21916.1	16111.2	10360.2
180.14	0	0	0	0	0	0	0	0	0	0	0	0	146.034	272.59	624.777	0	0	2166.85	2206.9	1619.02	144.161	280.153	304.165	3502.31	4093.02	3330.89	12602	14818.5	13507.8	135.252	142.518	413.834	286.872	137.064	310.003	1133.47	2060.67	544.226	1853.26	1481.52	2014.07	4597.22	4875.11	5065.99	2003.55	1756.75	624.296	5735.73	5485.9
1117.78	145.385	602.913	1277.29	1075.34	704.807	613.457	210.83	951.562	444.682	821.994	363.207	701.244	915.171	1054.03	83980.1	103833	123562	76453.4	97045.5	123816	65083.6	80642.3	86396.3	51171.9	68041.4	89007.9	30358.5	47709.5	47305.5	38377.6	43582.5	59135.2	34092.7	33301.9	33888.4	44057.6	27056.6	40882.3	11335.3	13656	38603.3	34139.7	37836.6	29391.1	27783.1	24120.5	37001.7	32708.1	26851.1
24078.5	21492.7	20148.5	21960.8	21883.9	20832.9	22222.8	20846.8	18937.4	20249.4	21619.3	20094.2	22801.5	20171	20266	24900.6	26550.1	25824.2	46190.9	50327.8	45649.6	37454.1	35490	34340.1	83335.8	85104	93646.4	137164	164270	164994	25979.7	25381	24447.4	31377.1	29960	32764.1	129236	156873	147719	81547.4	86699.4	84020.7	303470	328260	299561	60493	59283	63804.1	133336	135126
18203.9	17188.8	16155.5	16479.4	16605.8	16359.8	14897.8	13169.5	15106.9	17254.5	15896.8	14077	14974.1	12212.2	15235	9315.92	8588.46	11594.3	8791.9	6975.93	9040.49	10090.8	10948.2	14142.7	12003.1	9693.95	14723.2	17379.5	10443.5	14666.4	9805.29	11146.5	12776.5	12103.3	11978.1	13844.4	7750.96	13797.5	14130.9	27881.7	21832.7	27631.7	15722.9	14126.1	15402.5	16078.7	17014.8	18008.1	13608.8	10717.3
707.237	484.042	627.582	433.506	526.974	493.677	431.1	325.639	642.816	537.35	695.918	292.12	424.117	572.241	425.18	734.412	1156.8	500.931	945.032	446.072	169.605	287.593	362.698	649.883	1581.03	732.39	862.795	25632.7	32375.8	29161.2	1299.27	1054.19	1812.55	914.65	909.422	611.464	1239.04	493.293	156.275	342.984	869.667	461.676	8364.07	10009.1	8804.41	484.417	945.461	160.067	6047.13	7386.32
5719.75	6893.03	6033.28	6384.6	6045.67	7280.56	7210.68	6859.89	6990.97	6407.01	6816.76	6932.88	7025.41	7075.93	7302.93	6685.56	7354.15	6679.3	6322.79	6331	7886.01	5569.82	7007.9	6609.07	5801.31	6610.49	7252.29	15925.4	16112.8	16746.7	7566.74	6704.58	7216.48	6475.01	7080.5	6336.82	7144.8	7538.75	7926.65	6591.27	7159.54	6389.81	15064	14446.1	15237.1	5336.31	6074.2	7103.06	5873.83	9213.65
3943.97	2631.2	4159.4	3852.9	3121.05	3100.65	3349.14	3075.73	2880.31	2934.47	3758.28	3435.27	3771.64	2769.02	3938.09	436253	270726	485864	126977	43618.2	96302.4	255902	223386	305604	14094.2	14753.3	13237.9	5362.92	7525.42	6654.15	19277.4	19706.1	25833.3	163729	88122.2	200807	9609.97	12860.3	13476.3	30382.5	42581.3	41671.4	10298.1	47012.8	30076.4	40351.4	57824.5	66911.7	16650.6	18408.7
17074.2	12681	11872.2	14566.9	11575.8	11557.6	14924.8	12478.8	11744.5	14170.2	14281.4	12461.1	13466.2	13154.9	11562.3	39723.7	38310.7	39302.1	6.65074e+06	6.29411e+06	6.19299e+06	1.96587e+06	1.76383e+06	1.75889e+06	30342	29704	31052.6	5.26749e+06	5.55537e+06	5.29651e+06	29740.3	29668.2	29438.3	2.09395e+06	2.08058e+06	2.02749e+06	6.21775e+06	5.75011e+06	5.60873e+06	38837	39632.7	39450.6	6.09861e+06	5.90896e+06	5.70414e+06	5.66432e+06	5.65102e+06	5.65399e+06	2.26687e+06	2.18494e+06
5129.24	4788.05	4321.91	3611.69	2819.47	3597.26	4325.64	4332.04	2175.84	3482.59	4294.06	3058.53	5156.36	3368.09	3810.86	189919	208912	198507	91772.7	93349	97420.8	27561.9	31723.2	34603	127323	139152	145240	89854.1	98162.1	94489.9	102460	113966	112193	30046.9	30514.2	19531.2	81243.2	95475.4	98697.9	101185	80922.1	85525	135529	141337	143919	47440.7	34586	38500.8	62436.6	64471
13246.8	12793.6	12003.1	13566	12465.7	12486.9	13130.3	14483.3	11129.6	13192.9	12868.7	8869.67	12594.8	12464.6	9729.87	30617.2	29517.4	31009.8	92998.8	121926	102359	83277.5	101086	100635	313939	321319	267704	59972.2	58635	29296	25191.2	22445.5	20962.8	41697.3	48114.8	45133	187129	191092	244870	167931	186412	197542	149091	160998	166624	279919	274190	262261	44969.7	48025.6
6154	5233.49	6593.77	5525.55	5843.16	5397.72	5362.74	5153.22	6301.56	5341.22	5516.15	5340.59	5793.88	5558.45	6131.6	12836.9	9985.55	24831.8	18363.8	15426.2	39924.9	13541	10305.5	15123.7	54896.9	105243	81821.6	72500.1	67064.2	60834.7	28981	27754.2	12556.5	4424.25	5205.63	4412.85	43151.4	13264.1	452020	254088	162888	181629	59580.7	78428.8	140120	29785.7	48720.2	17541.1	13037.2	8295.03
43966.5	34928.8	33030.4	39003.6	34743.7	29299	44652.4	31815.2	27784.9	41306.3	32533.8	27632.4	35157.2	27705.8	29786.3	510982	589754	543116	2.30562e+06	2.55857e+06	2.39138e+06	33166.5	29398.4	35230.3	6.35928e+06	6.44536e+06	6.64025e+06	75383.4	74563.1	85178.4	1.6221e+06	1.8756e+06	1.8012e+06	1.663e+06	1.59793e+06	1.54419e+06	6.50911e+06	6.66868e+06	6.2032e+06	1.96874e+06	2.07473e+06	2.03775e+06	4.77905e+06	4.94215e+06	4.47292e+06	803407	878719	792984	1.24587e+06	1.22925e+06
[truncated: 10 more columns]

## Sheet: blood_test_sample_info
Supplemental Data S1. All exposome and internal multi-omics data used in this study.
sample_id	STARTING_DATE	Axis1	Axis2	Axis3	Filter_No	batch	location	geo	geo2	duration	date.month	date.start	date.end	season	date.mid
2016-01-15	2016-01-15	-7248.64	32828.7	25823.2	202	11	Campus	uswest	Westcoast	2.84155	1	2016-01-15	2016-01-18	winter	2016-01-17
2016-01-18	2016-01-18	108591	-238278	5416.99	203	22	Campus	uswest	Westcoast	3.94248	1	2016-01-18	2016-01-22	winter	2016-01-20
2016-01-25	2016-01-25	67428.5	53512.5	-119354	207	14	Campus	uswest	Westcoast	3.44502	1	2016-01-25	2016-01-28	winter	2016-01-27
2016-02-22	2016-02-22	38344.2	78740.4	17747.5	218	23	Campus	uswest	Westcoast	2.79965	2	2016-02-22	2016-02-25	winter	2016-02-24
2016-03-03	2016-03-03	63203.7	-8107.62	29325.9	283	28	Campus	uswest	Westcoast	0.565162	3	2016-03-03	2016-03-07	spring	2016-03-05

[truncated: 14 more sheets: blood_test_variable_info, blood_test_expression_data, cytokine_sample_info, cytokine_variable_info, cytokine_expression_data, microbiome_sample_info, microbiome_variable_info, microbiome_expression_data, metabolome_sample_info, metabolome_variable_info, metabolome_expression_data, proteome_sample_info, proteome_variable_info, proteome_expression_data]
