# Supplementary material for: Precision environmental health monitoring by longitudinal exposome and multi-omics profiling
Source: Genome Res. 2022 Jun;32(6):1199–214. doi: 10.1101/gr.276521.121 (PMC9248886; doi:10.1101/gr.276521.121)
Supplement: Supplemental Material [file supp_gr.276521.121_Supplemental_Data_S2.xlsx]

## Sheet: Node information
Supplemental Data S2. The detailed information of the intra-correlation network of the chemical exposome.
node	peak_ID	Chemical_class	Monoisotopic_Mass	mz	rt	Fold_Enrich
Bisphenol A	PM2004	Bisphenols	228.115	229.14	7.38784	571.303
Bisphenol S	PM2126	Bisphenols	250.03	251.184	6.83502	86.9297
Bisphenol F	PM1795	Bisphenols	200.084	201.109	6.42892	175.973
Tetrabromobisphenol A diallyl ether	PM3067	Brominated Flame Retardants (BFRs)	619.82	620.532	23.8123	291.999
1,2,3,7,8,9-Hexachlorodibenzo-P-dioxin	PM2632	Dioxins	387.819	389.11	9.7184	14.712
1,2,3,7,8-Pentachlorodibenzo-P-dioxin	PM2493	Dioxins	387.819	355.069	21.803	36.1413
4-(N-Nitrosomethylamino)-1-(3-pyridyl)-1-butanone	PM1843	IARC Group 1 Carcinogens	207.101	208.153	7.80662	31.4034
4-Aminobiphenyl	PM1049	IARC Group 1 Carcinogens	169.089	170.176	6.07432	53.1007
o-Toluidine	PM0626	IARC Group 1 Carcinogens	107.073	108.081	11.3246	14.3418
Aflatoxin B1	PM2363	IARC Group 1 Carcinogens	312.063	313.213	17.4698	32.0835
Aflatoxin B2	NM4327	IARC Group 1 Carcinogens	314.079	313.236	4.73	33.5743
Benzidine	PM1244	IARC Group 1 Carcinogens	184.1	185.116	6.9582	18.3949
N-Nitrosonornicotine	PM1111	IARC Group 1 Carcinogens	177.09	178.107	6.95007	16.7888
Chloral	PM0834	IARC Group 2A Carcinogens	145.909	147.101	7.35967	11.3098
Cyclopenta[cd]pyrene	PM1996	IARC Group 2A Carcinogens	226.078	227.174	7.83681	158.385
Dimethyl sulfate	PM0711	IARC Group 2A Carcinogens	125.999	127.111	7.68452	41.7033
2-Amino-3-methylimidazo(4,5-f)quinoline	PM1768	IARC Group 2A Carcinogens	198.091	199.169	14.024	24.8204
N-Nitrosodiethylamine	PM0320	IARC Group 2A Carcinogens	102.079	103.128	8.28194	14.214
Styrene oxide	PM0682	IARC Group 2A Carcinogens	120.058	121.101	7.26818	17.1967
Ethyl carbamate	NM0104	IARC Group 2A Carcinogens	89.0477	88.2397	4.86283	10.0652
Bergapten	PM1927	IARC Group 2A Carcinogens	216.042	217.191	5.9874	340.038
4-Nitrotoluene	NM1145	IARC Group 2A Carcinogens	137.048	136.261	1.0126	152.93
1-Nitropyrene	PM2111	IARC Group 2A Carcinogens	247.063	248.184	6.99252	99.8646
Methylnitronitrosoguanidine	NM2174	IARC Group 2A Carcinogens	147.039	146.167	5.89848	14.8709
Tetrachloroethylene	NM2680	IARC Group 2A Carcinogens	163.875	162.981	1.13383	33.9258
Dibromoethane	PM1307	IARC Group 2A Carcinogens	185.868	186.75	11.3273	46.0201
Tris(2,3-dibromopropyl) phosphate	PM3167	IARC Group 2A Carcinogens	691.581	692.531	16.0452	13.4615
3,3',4,4'-Tetrachloroazobenzene	PM2383	IARC Group 2A Carcinogens	317.929	319.185	10.9194	16.3313
Styrene	PM0466	IARC Group 2A Carcinogens	104.063	105.122	8.23708	12.4338
4-Chloro-o-toluidine	NM1550	IARC Group 2A Carcinogens	141.035	140.025	7.35619	10.0184
Mercaptobenzothiazole	PM1024	IARC Group 2A Carcinogens	166.986	168.063	6.09074	41.8034
Fusarin C	PM2807	Mycotoxins	431.194	432.455	27.429	95.6664
Saxitoxin	NM4281	Mycotoxins	299.134	298.127	4.70095	19.2501
Zearalenone	PM2384	Mycotoxins	318.147	319.193	9.00086	10.8297
4-Ipomeanol	PM1040	Mycotoxins	168.079	169.126	6.07786	81.491
Fumitremorgin C	PM2594	Mycotoxins	379.19	380.196	22.7147	10.3706
Citrinin	PM2128	Mycotoxins	250.084	251.195	6.66159	57.3233
Ergotamine	PM3023	Mycotoxins	581.264	582.471	24.7474	19.3862
Zeranol	NM4337	Mycotoxins	322.178	321.171	4.63	68.0325
Triisobutyl phosphate	PM2198	Organophosphate Flame Retardants (OPFRs)	266.165	267.171	11.1441	139.526
Tris(4-isopropylphenyl) phosphate	PM2850	Organophosphate Flame Retardants (OPFRs)	452.212	453.338	7.51125	41.0703
Perfluoroheptanoic acid (PFHpA)	PM2540	Per- and Polyfluoroalkyl Substances (PFASs)	363.977	365.279	14.0401	667.672
Perfluorobutanesulfonic acid (PFBS)	NM4287	Per- and Polyfluoroalkyl Substances (PFASs)	299.95	299.041	8.97	120.436
Perfluorohexanesulfonic acid (PFHxS)	PM2688	Per- and Polyfluoroalkyl Substances (PFASs)	399.944	401.268	22.6832	10.0376
Perfluorooctanoic acid (PFOA)	PM2739	Per- and Polyfluoroalkyl Substances (PFASs)	413.974	415.271	22.7068	90.8996
Perfluorononanoic acid (PFNA)	PM2871	Per- and Polyfluoroalkyl Substances (PFASs)	463.971	465.318	22.2758	11.3863
Heptafluorobutyric acid	NM3534	Per- and Polyfluoroalkyl Substances (PFASs)	213.986	212.977	1.12013	11.8803
Diazinon	PM2336	Pesticides	304.101	305.303	25.1127	40.8188
3-Hydroxycarbofuran	PM2056	Pesticides	237.1	238.106	10.5838	31.1913
Cyromazine	PM1018	Pesticides	166.097	167.106	7.13495	44.9665
Dioxacarb	PM1979	Pesticides	223.084	224.099	10.7692	14.0025
Ethion	PM2619	Pesticides	383.988	385.305	14.0321	59.1605
Parathion	PM2297	Pesticides	291.033	292.234	17.4553	42.2118
4-Nitrophenol	NM1340	Pesticides	139.027	138.019	9.20797	18.7216
Ethylparaben	PM1015	Pesticides	166.063	167.073	6.6768	30.7709
Aldicarb	PM1499	Pesticides	190.078	191.15	11.3955	15.1254
Aminocarb	PM1849	Pesticides	208.121	209.138	6.14093	124.563
Fenitrothion	PM2255	Pesticides	277.017	278.268	12.5831	158.302
Ethirimol	PM1860	Pesticides	209.153	210.169	6.66427	162.717
Diethofencarb	PM2201	Pesticides	267.147	268.159	7.76807	35.1004
Methylparaben	NM2328	Pesticides	152.047	151.039	7.93782	14.7796
Pyridine	PM0006	Pesticides	79.0422	80.0497	9.67098	19.1062
Simetryn	PM1890	Pesticides	213.105	214.119	11.222	29.3164
Pyracarbolid	PM1936	Pesticides	217.11	218.117	13.0375	140.64
Omethoate	PM1888	Pesticides	213.022	214.03	5.97242	64.0791
Bentazone	NM3850	Pesticides	240.057	239.049	8.28704	41.8681
Azoxystrobin	PM2702	Pesticides	403.117	404.424	27.4317	151.651
Disulfoton	PM2246	Pesticides	274.028	275.214	13.0856	90.2943
Glyphosate	PM1048	Pesticides	169.014	170.153	13.363	187.576
Benzoic acid	NM0692	Pesticides	122.037	121.029	4.66017	12.6116
Fenuron	PM0996	Pesticides	164.095	165.112	6.3071	76.6632
Thiofanox	PM1944	Pesticides	218.109	219.108	5.95643	371.736
Prometon	PM1990	Pesticides	225.159	226.164	6.13569	68.252
Propoxur	NM3471	Pesticides	209.105	208.095	17.2672	12.845
Tricyclazole	PM1454	Pesticides	189.036	190.049	22.7074	296.035
Isoprocarb	PM1594	Pesticides	193.11	194.114	8.04698	140.147
Aldicarb sulfoxide	PM1836	Pesticides	206.073	207.083	13.0439	65.7657
Thidiazuron	PM1956	Pesticides	220.042	221.04	5.942	292.141
Mexacarbate	PM1977	Pesticides	222.137	223.153	6.32598	69.9101
Fenoxycarb	PM2318	Pesticides	301.131	302.143	14.9326	154.263
Carbofuran	PM1971	Pesticides	221.105	222.184	16.3766	33.8784
Pymetrozin	PM1935	Pesticides	217.096	218.109	8.53106	36.9953
Fenazaquin	NM4303	Pesticides	306.173	305.161	9.02394	347.729
Dinoseb	NM3853	Pesticides	240.075	239.065	5.92258	15.5181
Carbaryl	PM1801	Pesticides	201.079	202.179	9.86263	18.7202
Metribuzin	PM1902	Pesticides	214.089	215.088	6.41557	157.052
Siduron	NM3793	Pesticides	232.158	231.158	4.69243	134.723
Diethyltoluamide	PM1527	Pharmaceuticals and Personal Care Products (PPCPs)	191.131	192.138	11.1994	94.7753
Musk xylene	NM4270	Pharmaceuticals and Personal Care Products (PPCPs)	297.096	296.229	4.76173	317.208
Octyl-methoxycinnamate	PM2295	Pharmaceuticals and Personal Care Products (PPCPs)	290.188	291.287	24.9439	196.177
Aspirin	PM1149	Pharmaceuticals and Personal Care Products (PPCPs)	180.042	181.162	7.75812	20.1087
Oxybenzone	NM3747	Pharmaceuticals and Personal Care Products (PPCPs)	228.079	227.2	5.71488	71.7843
4-Hydroxybenzoic acid	NM1240	Pharmaceuticals and Personal Care Products (PPCPs)	138.032	137.047	4.68869	247.685
Enzacamene	PM2143	Pharmaceuticals and Personal Care Products (PPCPs)	254.167	255.155	7.90938	18.166
Diclofenac	NM4256	Pharmaceuticals and Personal Care Products (PPCPs)	295.017	294.132	5.58952	19.9084
Norethindrone	PM2312	Pharmaceuticals and Personal Care Products (PPCPs)	298.193	299.109	7.97338	121.289
Tonalid	PM2158	Pharmaceuticals and Personal Care Products (PPCPs)	258.198	259.15	6.4861	17.1985
Ethinylestradiol	PM2308	Pharmaceuticals and Personal Care Products (PPCPs)	296.178	297.241	14.2533	17.7105
Testosterone	PM2286	Pharmaceuticals and Personal Care Products (PPCPs)	288.209	289.176	11.5002	34.8633
Galaxolide	PM2159	Pharmaceuticals and Personal Care Products (PPCPs)	258.198	259.189	13.2638	12.3621
Clofibric acid	PM1900	Pharmaceuticals and Personal Care Products (PPCPs)	214.04	215.052	15.3833	12.7546
Budesonide	PM2804	Pharmaceuticals and Personal Care Products (PPCPs)	430.236	431.443	25.7431	62.8448
Naproxen	PM2019	Pharmaceuticals and Personal Care Products (PPCPs)	230.094	231.158	10.0023	61.1465
Estradiol	PM2233	Pharmaceuticals and Personal Care Products (PPCPs)	272.178	273.166	6.81091	127.667
Paracetamol	NM2302	Pharmaceuticals and Personal Care Products (PPCPs)	151.063	150.019	4.55049	12.6918
Estrone	PM2226	Pharmaceuticals and Personal Care Products (PPCPs)	270.162	271.318	27.6868	74.8414
Hydrocortisone	PM2532	Pharmaceuticals and Personal Care Products (PPCPs)	362.209	363.176	8.5104	33.8539
Ibuprofen	PM1838	Pharmaceuticals and Personal Care Products (PPCPs)	206.131	207.24	7.375	304.361
Salicylic acid	NM1254	Pharmaceuticals and Personal Care Products (PPCPs)	138.032	137.155	4.68865	665.534
p-Hydroxy-meta-chlorophenylpiperazine	PM1880	Pharmaceuticals and Personal Care Products (PPCPs)	212.072	213.108	8.00713	73.9446
Tetracycline	PM2839	Pharmaceuticals and Personal Care Products (PPCPs)	444.153	445.266	5.02477	127.415
Diethylene glycol	PM0594	Plasticizers	106.063	107.07	7.77973	361.093
Mono-n-butyl phthalate	PM1976	Plasticizers	222.089	223.096	10.8277	14.8891
Mono(2-ethylhexyl) phthalate	PM2260	Plasticizers	278.152	279.158	22.7083	86.5397
Phthalic acid	PM1013	Plasticizers	166.027	167.033	22.7088	776.703
Benzyl butyl phthalate	PM2367	Plasticizers	312.136	313.32	22.9048	42.488
Trimethyl Phosphate	NM1446	Plasticizers	140.024	139.022	7.36292	15.3754
3,3′,4,4′-Tetrachlorobiphenyl (PCB77)	PM2291	Polychlorinated Biphenyls (PCBs)	289.922	291.106	8.19647	26.1299
3,4,4',5-Tetrachlorobiphenyl (PCB 81)	PM2293	Polychlorinated Biphenyls (PCBs)	289.922	291.231	21.4033	73.4572
2,4,4'-Trichlorobiphenyl (PCB 28)	PM2151	Polychlorinated Biphenyls (PCBs)	255.961	257.099	5.58798	17.5045
Tetrachloronaphthalene	PM2187	Polychlorinated Naphthalenes (PCNs)	263.907	265.136	13.0331	27.3874
Hexachloronaphthalene	NM4350	Polychlorinated Naphthalenes (PCNs)	331.829	330.977	4.63992	161.655
Dichloronaphthalene	PM1704	Polychlorinated Naphthalenes (PCNs)	195.985	197.123	5.94902	24.7286
Pentachloronaphthalene	NM4272	Polychlorinated Naphthalenes (PCNs)	297.868	297.044	9.11855	174.073
Chloronaphthalene	PM0964	Polychlorinated Naphthalenes (PCNs)	162.024	163.075	7.72105	52.7582
Fluorene	PM1019	Polycyclic Aromatic Hydrocarbons (PAHs)	166.078	167.146	7.06633	54.1025
Benzo[k]fluoranthene	NM3982	Polycyclic Aromatic Hydrocarbons (PAHs)	252.094	251.163	5.61641	11.4492
Dibenz[a,j]acridine	PM2262	Polycyclic Aromatic Hydrocarbons (PAHs)	279.105	280.162	22.7077	46.4783
Chrysene	PM2002	Polycyclic Aromatic Hydrocarbons (PAHs)	228.094	229.067	16.5283	12.5463
7H-Benzo[c]fluorene	PM1926	Polycyclic Aromatic Hydrocarbons (PAHs)	216.094	217.179	10.9953	27.0249
Acenaphthylene	PM0901	Polycyclic Aromatic Hydrocarbons (PAHs)	152.063	153.09	8.14349	13.3684
Phenanthrene	NM2977	Polycyclic Aromatic Hydrocarbons (PAHs)	178.078	177.091	4.71143	41.794
Benzo[a]pyrene	PM2134	Polycyclic Aromatic Hydrocarbons (PAHs)	252.094	253.163	6.06778	85.0901
Naphthalene	PM0716	Polycyclic Aromatic Hydrocarbons (PAHs)	128.063	129.052	6.23177	87.3286
Anthracene	PM1121	Polycyclic Aromatic Hydrocarbons (PAHs)	178.078	179.127	6.44988	103.275
Pyrene	PM1810	Polycyclic Aromatic Hydrocarbons (PAHs)	202.078	203.146	11.8796	24.3738
Benzo[b]fluoranthene	NM3981	Polycyclic Aromatic Hydrocarbons (PAHs)	252.094	251.163	4.71503	25.7546
Fluoranthene	PM1811	Polycyclic Aromatic Hydrocarbons (PAHs)	202.078	203.183	9.85983	12.2038
Dibenzo[a,l]pyrene	PM2325	Polycyclic Aromatic Hydrocarbons (PAHs)	302.11	303.085	14.9398	29.2319
2,4,6-Trinitrotoluene	PM2000	USEPA Emerging Contaminants	227.018	228.195	22.7073	10.8094
1,4-Dioxane	PM0034	USEPA Emerging Contaminants	88.0524	89.0793	7.35323	53.5256
2,4-Dinitrotoluene	PM1180	USEPA Emerging Contaminants	182.033	183.174	11.5291	12.3917

## Sheet: Edge information
Supplemental Data S2. The detailed information of the intra-correlation network of the chemical exposome.
from	to	Correlation	p_value	p_adjust
Diethyltoluamide	4-(N-Nitrosomethylamino)-1-(3-pyridyl)-1-butanone	1	0.0166667	0.0166944
Diethyltoluamide	Diazinon	1	0.0166667	0.0166944
Diethyltoluamide	3-Hydroxycarbofuran	1	0.0166667	0.0166944
Diethyltoluamide	Cyromazine	1	0.0166667	0.0166944
Diethyltoluamide	Dioxacarb	1	0.0166667	0.0166944
Diethyltoluamide	Fluorene	1	0.0166667	0.0166944
Diethyltoluamide	Benzo[k]fluoranthene	1	0.0166667	0.0166944
Diethyltoluamide	Dibenz[a,j]acridine	1	0.0166667	0.0166944
Diethyltoluamide	Musk xylene	0.974679	0.00481823	0.0166944
Diethyltoluamide	Octyl-methoxycinnamate	1	0.0166667	0.0166944
Diethyltoluamide	Aspirin	1	0.0166667	0.0166944
Diethylene glycol	4-Aminobiphenyl	1	0.0166667	0.0166944
Diethylene glycol	o-Toluidine	1	0.0166667	0.0166944
Diethylene glycol	2,4,6-Trinitrotoluene	1	0.0166667	0.0166944
Diethylene glycol	Perfluoroheptanoic acid (PFHpA)	1	0.0166667	0.0166944
Diethylene glycol	Mono-n-butyl phthalate	1	0.0166667	0.0166944
Diethylene glycol	Ethion	1	0.0166667	0.0166944
Diethylene glycol	Parathion	1	0.0166667	0.0166944
Diethylene glycol	4-Nitrophenol	1	0.0166667	0.0166944
Diethylene glycol	Ethylparaben	1	0.0166667	0.0166944
Diethylene glycol	Aldicarb	1	0.0166667	0.0166944
Diethylene glycol	Aminocarb	1	0.0166667	0.0166944
Diethylene glycol	Fenitrothion	1	0.0166667	0.0166944
Diethylene glycol	Ethirimol	1	0.0166667	0.0166944
Diethylene glycol	Diethofencarb	1	0.0166667	0.0166944
Diethylene glycol	Methylparaben	1	0.0166667	0.0166944
Diethylene glycol	Chrysene	1	0.0166667	0.0166944
Diethylene glycol	7H-Benzo[c]fluorene	1	0.0166667	0.0166944
Diethylene glycol	Chloral	1	0.0166667	0.0166944
Diethylene glycol	Cyclopenta[cd]pyrene	1	0.0166667	0.0166944
Diethylene glycol	Dimethyl sulfate	1	0.0166667	0.0166944
Diethylene glycol	2-Amino-3-methylimidazo(4,5-f)quinoline	1	0.0166667	0.0166944
Diethylene glycol	Fusarin C	0.974679	0.00481823	0.0166944
Diethylene glycol	Saxitoxin	1	0.0166667	0.0166944
Diethylene glycol	Oxybenzone	1	0.0166667	0.0166944
Diethylene glycol	4-Hydroxybenzoic acid	1	0.0166667	0.0166944
Omethoate	Perfluorobutanesulfonic acid (PFBS)	1	0.0166667	0.0166944
Omethoate	Perfluorohexanesulfonic acid (PFHxS)	1	0.0166667	0.0166944
Omethoate	Bentazone	1	0.0166667	0.0166944
Omethoate	1,2,3,7,8,9-Hexachlorodibenzo-P-dioxin	1	0.0166667	0.0166944
Omethoate	Benzo[a]pyrene	1	0.0166667	0.0166944
Omethoate	3,4,4',5-Tetrachlorobiphenyl (PCB 81)	1	0.0166667	0.0166944
Omethoate	Bisphenol S	1	0.0166667	0.0166944
Omethoate	Zearalenone	1	0.0166667	0.0166944
Omethoate	4-Ipomeanol	1	0.0166667	0.0166944
Omethoate	Norethindrone	1	0.0166667	0.0166944
Omethoate	Tonalid	1	0.0166667	0.0166944
Pyridine	1,4-Dioxane	1	0.0166667	0.0166944
Pyridine	Mono(2-ethylhexyl) phthalate	1	0.0166667	0.0166944
Pyridine	Simetryn	1	0.0166667	0.0166944
Pyridine	Pyracarbolid	1	0.0166667	0.0166944
Pyridine	Acenaphthylene	-1	0.0166667	0.0166944
Pyridine	Phenanthrene	1	0.0166667	0.0166944
Pyridine	3,3′,4,4′-Tetrachlorobiphenyl (PCB77)	-1	0.0166667	0.0166944
Pyridine	Tetrachloronaphthalene	1	0.0166667	0.0166944
Pyridine	Hexachloronaphthalene	1	0.0166667	0.0166944
Pyridine	Bisphenol A	1	0.0166667	0.0166944
Pyridine	N-Nitrosodiethylamine	1	0.0166667	0.0166944
Pyridine	Styrene oxide	1	0.0166667	0.0166944
Pyridine	Enzacamene	1	0.0166667	0.0166944
Pyridine	Diclofenac	1	0.0166667	0.0166944
Phthalic acid	Perfluorooctanoic acid (PFOA)	1	0.0166667	0.0166944
Phthalic acid	Triisobutyl phosphate	1	0.0166667	0.0166944
Phthalic acid	Azoxystrobin	1	0.0166667	0.0166944
Phthalic acid	Disulfoton	1	0.0166667	0.0166944
Phthalic acid	Glyphosate	1	0.0166667	0.0166944
Phthalic acid	Benzoic acid	1	0.0166667	0.0166944
Phthalic acid	Fenuron	1	0.0166667	0.0166944
Phthalic acid	Thiofanox	1	0.0166667	0.0166944
Phthalic acid	Prometon	1	0.0166667	0.0166944
Phthalic acid	Propoxur	1	0.0166667	0.0166944
Phthalic acid	1,2,3,7,8-Pentachlorodibenzo-P-dioxin	1	0.0166667	0.0166944
Phthalic acid	Naphthalene	1	0.0166667	0.0166944
Phthalic acid	Anthracene	1	0.0166667	0.0166944
Phthalic acid	Pyrene	1	0.0166667	0.0166944
Phthalic acid	Benzo[b]fluoranthene	1	0.0166667	0.0166944
Phthalic acid	2,4,4'-Trichlorobiphenyl (PCB 28)	1	0.0166667	0.0166944
Phthalic acid	Dichloronaphthalene	1	0.0166667	0.0166944
Phthalic acid	Bisphenol F	1	0.0166667	0.0166944
Phthalic acid	Ethyl carbamate	-1	0.0166667	0.0166944
Phthalic acid	Bergapten	1	0.0166667	0.0166944
Phthalic acid	4-Nitrotoluene	-0.974679	0.00481823	0.0166944
Phthalic acid	Fusarin C	0.974679	0.00481823	0.0166944
Phthalic acid	Fumitremorgin C	1	0.0166667	0.0166944
Phthalic acid	Ethinylestradiol	1	0.0166667	0.0166944
Phthalic acid	Testosterone	1	0.0166667	0.0166944
Phthalic acid	Galaxolide	1	0.0166667	0.0166944
Phthalic acid	Clofibric acid	1	0.0166667	0.0166944
Phthalic acid	Budesonide	1	0.0166667	0.0166944
Phthalic acid	Naproxen	1	0.0166667	0.0166944
4-Aminobiphenyl	o-Toluidine	1	0.0166667	0.0166944
4-Aminobiphenyl	2,4,6-Trinitrotoluene	1	0.0166667	0.0166944
4-Aminobiphenyl	Perfluoroheptanoic acid (PFHpA)	1	0.0166667	0.0166944
4-Aminobiphenyl	Mono-n-butyl phthalate	1	0.0166667	0.0166944
4-Aminobiphenyl	Ethion	1	0.0166667	0.0166944
4-Aminobiphenyl	Parathion	1	0.0166667	0.0166944
4-Aminobiphenyl	4-Nitrophenol	1	0.0166667	0.0166944
4-Aminobiphenyl	Ethylparaben	1	0.0166667	0.0166944
4-Aminobiphenyl	Aldicarb	1	0.0166667	0.0166944
4-Aminobiphenyl	Aminocarb	1	0.0166667	0.0166944
4-Aminobiphenyl	Fenitrothion	1	0.0166667	0.0166944
4-Aminobiphenyl	Ethirimol	1	0.0166667	0.0166944
4-Aminobiphenyl	Diethofencarb	1	0.0166667	0.0166944
4-Aminobiphenyl	Methylparaben	1	0.0166667	0.0166944
4-Aminobiphenyl	Chrysene	1	0.0166667	0.0166944
4-Aminobiphenyl	7H-Benzo[c]fluorene	1	0.0166667	0.0166944
4-Aminobiphenyl	Chloral	1	0.0166667	0.0166944
4-Aminobiphenyl	Cyclopenta[cd]pyrene	1	0.0166667	0.0166944
4-Aminobiphenyl	Dimethyl sulfate	1	0.0166667	0.0166944
4-Aminobiphenyl	2-Amino-3-methylimidazo(4,5-f)quinoline	1	0.0166667	0.0166944
4-Aminobiphenyl	Fusarin C	0.974679	0.00481823	0.0166944
4-Aminobiphenyl	Saxitoxin	1	0.0166667	0.0166944
4-Aminobiphenyl	Oxybenzone	1	0.0166667	0.0166944
4-Aminobiphenyl	4-Hydroxybenzoic acid	1	0.0166667	0.0166944
Aflatoxin B1	Aflatoxin B2	1	0.0166667	0.0166944
Aflatoxin B1	Benzidine	1	0.0166667	0.0166944
Aflatoxin B1	Tricyclazole	1	0.0166667	0.0166944
Aflatoxin B1	Isoprocarb	1	0.0166667	0.0166944
Aflatoxin B1	Aldicarb sulfoxide	1	0.0166667	0.0166944
Aflatoxin B1	Thidiazuron	1	0.0166667	0.0166944
Aflatoxin B1	Mexacarbate	1	0.0166667	0.0166944
Aflatoxin B1	Fenoxycarb	1	0.0166667	0.0166944
Aflatoxin B1	Pentachloronaphthalene	1	0.0166667	0.0166944
Aflatoxin B1	1-Nitropyrene	1	0.0166667	0.0166944
Aflatoxin B1	Citrinin	1	0.0166667	0.0166944
Aflatoxin B1	Estradiol	1	0.0166667	0.0166944
Aflatoxin B1	Musk xylene	0.974679	0.00481823	0.0166944
Aflatoxin B1	Paracetamol	-1	0.0166667	0.0166944
Aflatoxin B2	Benzidine	1	0.0166667	0.0166944
Aflatoxin B2	Tricyclazole	1	0.0166667	0.0166944
Aflatoxin B2	Isoprocarb	1	0.0166667	0.0166944
Aflatoxin B2	Aldicarb sulfoxide	1	0.0166667	0.0166944
Aflatoxin B2	Thidiazuron	1	0.0166667	0.0166944
Aflatoxin B2	Mexacarbate	1	0.0166667	0.0166944
Aflatoxin B2	Fenoxycarb	1	0.0166667	0.0166944
Aflatoxin B2	Pentachloronaphthalene	1	0.0166667	0.0166944
Aflatoxin B2	1-Nitropyrene	1	0.0166667	0.0166944
Aflatoxin B2	Citrinin	1	0.0166667	0.0166944
Aflatoxin B2	Estradiol	1	0.0166667	0.0166944
Aflatoxin B2	Musk xylene	0.974679	0.00481823	0.0166944
Aflatoxin B2	Paracetamol	-1	0.0166667	0.0166944
Benzidine	Tricyclazole	1	0.0166667	0.0166944
Benzidine	Isoprocarb	1	0.0166667	0.0166944
Benzidine	Aldicarb sulfoxide	1	0.0166667	0.0166944
Benzidine	Thidiazuron	1	0.0166667	0.0166944
Benzidine	Mexacarbate	1	0.0166667	0.0166944
Benzidine	Fenoxycarb	1	0.0166667	0.0166944
Benzidine	Pentachloronaphthalene	1	0.0166667	0.0166944
Benzidine	1-Nitropyrene	1	0.0166667	0.0166944
Benzidine	Citrinin	1	0.0166667	0.0166944
Benzidine	Estradiol	1	0.0166667	0.0166944
Benzidine	Musk xylene	0.974679	0.00481823	0.0166944
Benzidine	Paracetamol	-1	0.0166667	0.0166944
4-(N-Nitrosomethylamino)-1-(3-pyridyl)-1-butanone	Diazinon	1	0.0166667	0.0166944
4-(N-Nitrosomethylamino)-1-(3-pyridyl)-1-butanone	3-Hydroxycarbofuran	1	0.0166667	0.0166944
4-(N-Nitrosomethylamino)-1-(3-pyridyl)-1-butanone	Cyromazine	1	0.0166667	0.0166944
4-(N-Nitrosomethylamino)-1-(3-pyridyl)-1-butanone	Dioxacarb	1	0.0166667	0.0166944
4-(N-Nitrosomethylamino)-1-(3-pyridyl)-1-butanone	Fluorene	1	0.0166667	0.0166944
4-(N-Nitrosomethylamino)-1-(3-pyridyl)-1-butanone	Benzo[k]fluoranthene	1	0.0166667	0.0166944
4-(N-Nitrosomethylamino)-1-(3-pyridyl)-1-butanone	Dibenz[a,j]acridine	1	0.0166667	0.0166944
4-(N-Nitrosomethylamino)-1-(3-pyridyl)-1-butanone	Musk xylene	0.974679	0.00481823	0.0166944
4-(N-Nitrosomethylamino)-1-(3-pyridyl)-1-butanone	Octyl-methoxycinnamate	1	0.0166667	0.0166944
4-(N-Nitrosomethylamino)-1-(3-pyridyl)-1-butanone	Aspirin	1	0.0166667	0.0166944
N-Nitrosonornicotine	2,4-Dinitrotoluene	-1	0.0166667	0.0166944
N-Nitrosonornicotine	Ergotamine	1	0.0166667	0.0166944
N-Nitrosonornicotine	Estrone	1	0.0166667	0.0166944
o-Toluidine	2,4,6-Trinitrotoluene	1	0.0166667	0.0166944
o-Toluidine	Perfluoroheptanoic acid (PFHpA)	1	0.0166667	0.0166944
o-Toluidine	Mono-n-butyl phthalate	1	0.0166667	0.0166944
o-Toluidine	Ethion	1	0.0166667	0.0166944
o-Toluidine	Parathion	1	0.0166667	0.0166944
o-Toluidine	4-Nitrophenol	1	0.0166667	0.0166944
o-Toluidine	Ethylparaben	1	0.0166667	0.0166944
o-Toluidine	Aldicarb	1	0.0166667	0.0166944
o-Toluidine	Aminocarb	1	0.0166667	0.0166944
o-Toluidine	Fenitrothion	1	0.0166667	0.0166944
o-Toluidine	Ethirimol	1	0.0166667	0.0166944
o-Toluidine	Diethofencarb	1	0.0166667	0.0166944
o-Toluidine	Methylparaben	1	0.0166667	0.0166944
o-Toluidine	Chrysene	1	0.0166667	0.0166944
o-Toluidine	7H-Benzo[c]fluorene	1	0.0166667	0.0166944
o-Toluidine	Chloral	1	0.0166667	0.0166944
o-Toluidine	Cyclopenta[cd]pyrene	1	0.0166667	0.0166944
o-Toluidine	Dimethyl sulfate	1	0.0166667	0.0166944
o-Toluidine	2-Amino-3-methylimidazo(4,5-f)quinoline	1	0.0166667	0.0166944
o-Toluidine	Fusarin C	0.974679	0.00481823	0.0166944
o-Toluidine	Saxitoxin	1	0.0166667	0.0166944
o-Toluidine	Oxybenzone	1	0.0166667	0.0166944
o-Toluidine	4-Hydroxybenzoic acid	1	0.0166667	0.0166944
1,4-Dioxane	Mono(2-ethylhexyl) phthalate	1	0.0166667	0.0166944
1,4-Dioxane	Simetryn	1	0.0166667	0.0166944
1,4-Dioxane	Pyracarbolid	1	0.0166667	0.0166944
1,4-Dioxane	Acenaphthylene	-1	0.0166667	0.0166944
1,4-Dioxane	Phenanthrene	1	0.0166667	0.0166944
1,4-Dioxane	3,3′,4,4′-Tetrachlorobiphenyl (PCB77)	-1	0.0166667	0.0166944
1,4-Dioxane	Tetrachloronaphthalene	1	0.0166667	0.0166944
1,4-Dioxane	Hexachloronaphthalene	1	0.0166667	0.0166944
1,4-Dioxane	Bisphenol A	1	0.0166667	0.0166944
1,4-Dioxane	N-Nitrosodiethylamine	1	0.0166667	0.0166944
1,4-Dioxane	Styrene oxide	1	0.0166667	0.0166944
1,4-Dioxane	Enzacamene	1	0.0166667	0.0166944
1,4-Dioxane	Diclofenac	1	0.0166667	0.0166944
2,4,6-Trinitrotoluene	Perfluoroheptanoic acid (PFHpA)	1	0.0166667	0.0166944
2,4,6-Trinitrotoluene	Mono-n-butyl phthalate	1	0.0166667	0.0166944
2,4,6-Trinitrotoluene	Ethion	1	0.0166667	0.0166944
2,4,6-Trinitrotoluene	Parathion	1	0.0166667	0.0166944
2,4,6-Trinitrotoluene	4-Nitrophenol	1	0.0166667	0.0166944
2,4,6-Trinitrotoluene	Ethylparaben	1	0.0166667	0.0166944
2,4,6-Trinitrotoluene	Aldicarb	1	0.0166667	0.0166944
2,4,6-Trinitrotoluene	Aminocarb	1	0.0166667	0.0166944
2,4,6-Trinitrotoluene	Fenitrothion	1	0.0166667	0.0166944
2,4,6-Trinitrotoluene	Ethirimol	1	0.0166667	0.0166944
2,4,6-Trinitrotoluene	Diethofencarb	1	0.0166667	0.0166944
2,4,6-Trinitrotoluene	Methylparaben	1	0.0166667	0.0166944
2,4,6-Trinitrotoluene	Chrysene	1	0.0166667	0.0166944
2,4,6-Trinitrotoluene	7H-Benzo[c]fluorene	1	0.0166667	0.0166944
2,4,6-Trinitrotoluene	Chloral	1	0.0166667	0.0166944
2,4,6-Trinitrotoluene	Cyclopenta[cd]pyrene	1	0.0166667	0.0166944
2,4,6-Trinitrotoluene	Dimethyl sulfate	1	0.0166667	0.0166944
2,4,6-Trinitrotoluene	2-Amino-3-methylimidazo(4,5-f)quinoline	1	0.0166667	0.0166944
2,4,6-Trinitrotoluene	Fusarin C	0.974679	0.00481823	0.0166944
2,4,6-Trinitrotoluene	Saxitoxin	1	0.0166667	0.0166944
2,4,6-Trinitrotoluene	Oxybenzone	1	0.0166667	0.0166944
2,4,6-Trinitrotoluene	4-Hydroxybenzoic acid	1	0.0166667	0.0166944
2,4-Dinitrotoluene	Ergotamine	-1	0.0166667	0.0166944
2,4-Dinitrotoluene	Estrone	-1	0.0166667	0.0166944
Perfluorobutanesulfonic acid (PFBS)	Perfluorohexanesulfonic acid (PFHxS)	1	0.0166667	0.0166944
Perfluorobutanesulfonic acid (PFBS)	Bentazone	1	0.0166667	0.0166944
Perfluorobutanesulfonic acid (PFBS)	1,2,3,7,8,9-Hexachlorodibenzo-P-dioxin	1	0.0166667	0.0166944
Perfluorobutanesulfonic acid (PFBS)	Benzo[a]pyrene	1	0.0166667	0.0166944
Perfluorobutanesulfonic acid (PFBS)	3,4,4',5-Tetrachlorobiphenyl (PCB 81)	1	0.0166667	0.0166944
Perfluorobutanesulfonic acid (PFBS)	Bisphenol S	1	0.0166667	0.0166944
Perfluorobutanesulfonic acid (PFBS)	Zearalenone	1	0.0166667	0.0166944
Perfluorobutanesulfonic acid (PFBS)	4-Ipomeanol	1	0.0166667	0.0166944
Perfluorobutanesulfonic acid (PFBS)	Norethindrone	1	0.0166667	0.0166944
Perfluorobutanesulfonic acid (PFBS)	Tonalid	1	0.0166667	0.0166944
Perfluoroheptanoic acid (PFHpA)	Mono-n-butyl phthalate	1	0.0166667	0.0166944
Perfluoroheptanoic acid (PFHpA)	Ethion	1	0.0166667	0.0166944
Perfluoroheptanoic acid (PFHpA)	Parathion	1	0.0166667	0.0166944
Perfluoroheptanoic acid (PFHpA)	4-Nitrophenol	1	0.0166667	0.0166944
Perfluoroheptanoic acid (PFHpA)	Ethylparaben	1	0.0166667	0.0166944
Perfluoroheptanoic acid (PFHpA)	Aldicarb	1	0.0166667	0.0166944
Perfluoroheptanoic acid (PFHpA)	Aminocarb	1	0.0166667	0.0166944
Perfluoroheptanoic acid (PFHpA)	Fenitrothion	1	0.0166667	0.0166944
Perfluoroheptanoic acid (PFHpA)	Ethirimol	1	0.0166667	0.0166944
Perfluoroheptanoic acid (PFHpA)	Diethofencarb	1	0.0166667	0.0166944
Perfluoroheptanoic acid (PFHpA)	Methylparaben	1	0.0166667	0.0166944
Perfluoroheptanoic acid (PFHpA)	Chrysene	1	0.0166667	0.0166944
Perfluoroheptanoic acid (PFHpA)	7H-Benzo[c]fluorene	1	0.0166667	0.0166944
Perfluoroheptanoic acid (PFHpA)	Chloral	1	0.0166667	0.0166944
Perfluoroheptanoic acid (PFHpA)	Cyclopenta[cd]pyrene	1	0.0166667	0.0166944
Perfluoroheptanoic acid (PFHpA)	Dimethyl sulfate	1	0.0166667	0.0166944
Perfluoroheptanoic acid (PFHpA)	2-Amino-3-methylimidazo(4,5-f)quinoline	1	0.0166667	0.0166944
Perfluoroheptanoic acid (PFHpA)	Fusarin C	0.974679	0.00481823	0.0166944
Perfluoroheptanoic acid (PFHpA)	Saxitoxin	1	0.0166667	0.0166944
Perfluoroheptanoic acid (PFHpA)	Oxybenzone	1	0.0166667	0.0166944
Perfluoroheptanoic acid (PFHpA)	4-Hydroxybenzoic acid	1	0.0166667	0.0166944
Perfluorohexanesulfonic acid (PFHxS)	Bentazone	1	0.0166667	0.0166944
Perfluorohexanesulfonic acid (PFHxS)	1,2,3,7,8,9-Hexachlorodibenzo-P-dioxin	1	0.0166667	0.0166944
Perfluorohexanesulfonic acid (PFHxS)	Benzo[a]pyrene	1	0.0166667	0.0166944
Perfluorohexanesulfonic acid (PFHxS)	3,4,4',5-Tetrachlorobiphenyl (PCB 81)	1	0.0166667	0.0166944
Perfluorohexanesulfonic acid (PFHxS)	Bisphenol S	1	0.0166667	0.0166944
Perfluorohexanesulfonic acid (PFHxS)	Zearalenone	1	0.0166667	0.0166944
Perfluorohexanesulfonic acid (PFHxS)	4-Ipomeanol	1	0.0166667	0.0166944
Perfluorohexanesulfonic acid (PFHxS)	Norethindrone	1	0.0166667	0.0166944
Perfluorohexanesulfonic acid (PFHxS)	Tonalid	1	0.0166667	0.0166944
Perfluorooctanoic acid (PFOA)	Triisobutyl phosphate	1	0.0166667	0.0166944
Perfluorooctanoic acid (PFOA)	Azoxystrobin	1	0.0166667	0.0166944
Perfluorooctanoic acid (PFOA)	Disulfoton	1	0.0166667	0.0166944
Perfluorooctanoic acid (PFOA)	Glyphosate	1	0.0166667	0.0166944
Perfluorooctanoic acid (PFOA)	Benzoic acid	1	0.0166667	0.0166944
Perfluorooctanoic acid (PFOA)	Fenuron	1	0.0166667	0.0166944
Perfluorooctanoic acid (PFOA)	Thiofanox	1	0.0166667	0.0166944
Perfluorooctanoic acid (PFOA)	Prometon	1	0.0166667	0.0166944
Perfluorooctanoic acid (PFOA)	Propoxur	1	0.0166667	0.0166944
Perfluorooctanoic acid (PFOA)	1,2,3,7,8-Pentachlorodibenzo-P-dioxin	1	0.0166667	0.0166944
Perfluorooctanoic acid (PFOA)	Naphthalene	1	0.0166667	0.0166944
Perfluorooctanoic acid (PFOA)	Anthracene	1	0.0166667	0.0166944
Perfluorooctanoic acid (PFOA)	Pyrene	1	0.0166667	0.0166944
Perfluorooctanoic acid (PFOA)	Benzo[b]fluoranthene	1	0.0166667	0.0166944
Perfluorooctanoic acid (PFOA)	2,4,4'-Trichlorobiphenyl (PCB 28)	1	0.0166667	0.0166944
Perfluorooctanoic acid (PFOA)	Dichloronaphthalene	1	0.0166667	0.0166944
Perfluorooctanoic acid (PFOA)	Bisphenol F	1	0.0166667	0.0166944
Perfluorooctanoic acid (PFOA)	Ethyl carbamate	-1	0.0166667	0.0166944
Perfluorooctanoic acid (PFOA)	Bergapten	1	0.0166667	0.0166944
Perfluorooctanoic acid (PFOA)	4-Nitrotoluene	-0.974679	0.00481823	0.0166944
Perfluorooctanoic acid (PFOA)	Fusarin C	0.974679	0.00481823	0.0166944
Perfluorooctanoic acid (PFOA)	Fumitremorgin C	1	0.0166667	0.0166944
Perfluorooctanoic acid (PFOA)	Ethinylestradiol	1	0.0166667	0.0166944
Perfluorooctanoic acid (PFOA)	Testosterone	1	0.0166667	0.0166944
Perfluorooctanoic acid (PFOA)	Galaxolide	1	0.0166667	0.0166944
Perfluorooctanoic acid (PFOA)	Clofibric acid	1	0.0166667	0.0166944
Perfluorooctanoic acid (PFOA)	Budesonide	1	0.0166667	0.0166944
Perfluorooctanoic acid (PFOA)	Naproxen	1	0.0166667	0.0166944
Perfluorononanoic acid (PFNA)	Carbofuran	-1	0.0166667	0.0166944
Heptafluorobutyric acid	Hydrocortisone	-1	0.0166667	0.0166944
Benzyl butyl phthalate	Tris(4-isopropylphenyl) phosphate	1	0.0166667	0.0166944
Benzyl butyl phthalate	Fluoranthene	1	0.0166667	0.0166944
Benzyl butyl phthalate	Methylnitronitrosoguanidine	-1	0.0166667	0.0166944
Benzyl butyl phthalate	Ibuprofen	1	0.0166667	0.0166944
Mono(2-ethylhexyl) phthalate	Simetryn	1	0.0166667	0.0166944
Mono(2-ethylhexyl) phthalate	Pyracarbolid	1	0.0166667	0.0166944
Mono(2-ethylhexyl) phthalate	Acenaphthylene	-1	0.0166667	0.0166944
Mono(2-ethylhexyl) phthalate	Phenanthrene	1	0.0166667	0.0166944
Mono(2-ethylhexyl) phthalate	3,3′,4,4′-Tetrachlorobiphenyl (PCB77)	-1	0.0166667	0.0166944
Mono(2-ethylhexyl) phthalate	Tetrachloronaphthalene	1	0.0166667	0.0166944
Mono(2-ethylhexyl) phthalate	Hexachloronaphthalene	1	0.0166667	0.0166944
Mono(2-ethylhexyl) phthalate	Bisphenol A	1	0.0166667	0.0166944
Mono(2-ethylhexyl) phthalate	N-Nitrosodiethylamine	1	0.0166667	0.0166944
Mono(2-ethylhexyl) phthalate	Styrene oxide	1	0.0166667	0.0166944
Mono(2-ethylhexyl) phthalate	Enzacamene	1	0.0166667	0.0166944
Mono(2-ethylhexyl) phthalate	Diclofenac	1	0.0166667	0.0166944
Mono-n-butyl phthalate	Ethion	1	0.0166667	0.0166944
Mono-n-butyl phthalate	Parathion	1	0.0166667	0.0166944
Mono-n-butyl phthalate	4-Nitrophenol	1	0.0166667	0.0166944
Mono-n-butyl phthalate	Ethylparaben	1	0.0166667	0.0166944
Mono-n-butyl phthalate	Aldicarb	1	0.0166667	0.0166944
Mono-n-butyl phthalate	Aminocarb	1	0.0166667	0.0166944
Mono-n-butyl phthalate	Fenitrothion	1	0.0166667	0.0166944
Mono-n-butyl phthalate	Ethirimol	1	0.0166667	0.0166944
Mono-n-butyl phthalate	Diethofencarb	1	0.0166667	0.0166944
Mono-n-butyl phthalate	Methylparaben	1	0.0166667	0.0166944
Mono-n-butyl phthalate	Chrysene	1	0.0166667	0.0166944
Mono-n-butyl phthalate	7H-Benzo[c]fluorene	1	0.0166667	0.0166944
Mono-n-butyl phthalate	Chloral	1	0.0166667	0.0166944
Mono-n-butyl phthalate	Cyclopenta[cd]pyrene	1	0.0166667	0.0166944
Mono-n-butyl phthalate	Dimethyl sulfate	1	0.0166667	0.0166944
Mono-n-butyl phthalate	2-Amino-3-methylimidazo(4,5-f)quinoline	1	0.0166667	0.0166944
Mono-n-butyl phthalate	Fusarin C	0.974679	0.00481823	0.0166944
Mono-n-butyl phthalate	Saxitoxin	1	0.0166667	0.0166944
Mono-n-butyl phthalate	Oxybenzone	1	0.0166667	0.0166944
Mono-n-butyl phthalate	4-Hydroxybenzoic acid	1	0.0166667	0.0166944
Trimethyl Phosphate	Pymetrozin	-1	0.0166667	0.0166944
Trimethyl Phosphate	Tetrachloroethylene	1	0.0166667	0.0166944
Trimethyl Phosphate	Zeranol	-1	0.0166667	0.0166944
Trimethyl Phosphate	Salicylic acid	-0.974679	0.00481823	0.0166944
Triisobutyl phosphate	Azoxystrobin	1	0.0166667	0.0166944
Triisobutyl phosphate	Disulfoton	1	0.0166667	0.0166944
Triisobutyl phosphate	Glyphosate	1	0.0166667	0.0166944
Triisobutyl phosphate	Benzoic acid	1	0.0166667	0.0166944
Triisobutyl phosphate	Fenuron	1	0.0166667	0.0166944
Triisobutyl phosphate	Thiofanox	1	0.0166667	0.0166944
Triisobutyl phosphate	Prometon	1	0.0166667	0.0166944
Triisobutyl phosphate	Propoxur	1	0.0166667	0.0166944
Triisobutyl phosphate	1,2,3,7,8-Pentachlorodibenzo-P-dioxin	1	0.0166667	0.0166944
Triisobutyl phosphate	Naphthalene	1	0.0166667	0.0166944
Triisobutyl phosphate	Anthracene	1	0.0166667	0.0166944
Triisobutyl phosphate	Pyrene	1	0.0166667	0.0166944
Triisobutyl phosphate	Benzo[b]fluoranthene	1	0.0166667	0.0166944
Triisobutyl phosphate	2,4,4'-Trichlorobiphenyl (PCB 28)	1	0.0166667	0.0166944
Triisobutyl phosphate	Dichloronaphthalene	1	0.0166667	0.0166944
Triisobutyl phosphate	Bisphenol F	1	0.0166667	0.0166944
Triisobutyl phosphate	Ethyl carbamate	-1	0.0166667	0.0166944
Triisobutyl phosphate	Bergapten	1	0.0166667	0.0166944
Triisobutyl phosphate	4-Nitrotoluene	-0.974679	0.00481823	0.0166944
Triisobutyl phosphate	Fusarin C	0.974679	0.00481823	0.0166944
Triisobutyl phosphate	Fumitremorgin C	1	0.0166667	0.0166944
Triisobutyl phosphate	Ethinylestradiol	1	0.0166667	0.0166944
Triisobutyl phosphate	Testosterone	1	0.0166667	0.0166944
Triisobutyl phosphate	Galaxolide	1	0.0166667	0.0166944
Triisobutyl phosphate	Clofibric acid	1	0.0166667	0.0166944
Triisobutyl phosphate	Budesonide	1	0.0166667	0.0166944
Triisobutyl phosphate	Naproxen	1	0.0166667	0.0166944
Tris(4-isopropylphenyl) phosphate	Fluoranthene	1	0.0166667	0.0166944
Tris(4-isopropylphenyl) phosphate	Methylnitronitrosoguanidine	-1	0.0166667	0.0166944
Tris(4-isopropylphenyl) phosphate	Ibuprofen	1	0.0166667	0.0166944
Tetrabromobisphenol A diallyl ether	Fenazaquin	0.974679	0.00481823	0.0166944
Azoxystrobin	Disulfoton	1	0.0166667	0.0166944
Azoxystrobin	Glyphosate	1	0.0166667	0.0166944
Azoxystrobin	Benzoic acid	1	0.0166667	0.0166944
Azoxystrobin	Fenuron	1	0.0166667	0.0166944
Azoxystrobin	Thiofanox	1	0.0166667	0.0166944
Azoxystrobin	Prometon	1	0.0166667	0.0166944
Azoxystrobin	Propoxur	1	0.0166667	0.0166944
Azoxystrobin	1,2,3,7,8-Pentachlorodibenzo-P-dioxin	1	0.0166667	0.0166944
Azoxystrobin	Naphthalene	1	0.0166667	0.0166944
Azoxystrobin	Anthracene	1	0.0166667	0.0166944
Azoxystrobin	Pyrene	1	0.0166667	0.0166944
Azoxystrobin	Benzo[b]fluoranthene	1	0.0166667	0.0166944
Azoxystrobin	2,4,4'-Trichlorobiphenyl (PCB 28)	1	0.0166667	0.0166944
Azoxystrobin	Dichloronaphthalene	1	0.0166667	0.0166944
Azoxystrobin	Bisphenol F	1	0.0166667	0.0166944
Azoxystrobin	Ethyl carbamate	-1	0.0166667	0.0166944
Azoxystrobin	Bergapten	1	0.0166667	0.0166944
Azoxystrobin	4-Nitrotoluene	-0.974679	0.00481823	0.0166944
Azoxystrobin	Fusarin C	0.974679	0.00481823	0.0166944
Azoxystrobin	Fumitremorgin C	1	0.0166667	0.0166944
Azoxystrobin	Ethinylestradiol	1	0.0166667	0.0166944
Azoxystrobin	Testosterone	1	0.0166667	0.0166944
Azoxystrobin	Galaxolide	1	0.0166667	0.0166944
Azoxystrobin	Clofibric acid	1	0.0166667	0.0166944
Azoxystrobin	Budesonide	1	0.0166667	0.0166944
Azoxystrobin	Naproxen	1	0.0166667	0.0166944
Diazinon	3-Hydroxycarbofuran	1	0.0166667	0.0166944
Diazinon	Cyromazine	1	0.0166667	0.0166944
Diazinon	Dioxacarb	1	0.0166667	0.0166944
Diazinon	Fluorene	1	0.0166667	0.0166944
Diazinon	Benzo[k]fluoranthene	1	0.0166667	0.0166944
Diazinon	Dibenz[a,j]acridine	1	0.0166667	0.0166944
Diazinon	Musk xylene	0.974679	0.00481823	0.0166944
Diazinon	Octyl-methoxycinnamate	1	0.0166667	0.0166944
Diazinon	Aspirin	1	0.0166667	0.0166944
Disulfoton	Glyphosate	1	0.0166667	0.0166944
Disulfoton	Benzoic acid	1	0.0166667	0.0166944
Disulfoton	Fenuron	1	0.0166667	0.0166944
Disulfoton	Thiofanox	1	0.0166667	0.0166944
Disulfoton	Prometon	1	0.0166667	0.0166944
Disulfoton	Propoxur	1	0.0166667	0.0166944
Disulfoton	1,2,3,7,8-Pentachlorodibenzo-P-dioxin	1	0.0166667	0.0166944
Disulfoton	Naphthalene	1	0.0166667	0.0166944
Disulfoton	Anthracene	1	0.0166667	0.0166944
Disulfoton	Pyrene	1	0.0166667	0.0166944
Disulfoton	Benzo[b]fluoranthene	1	0.0166667	0.0166944
Disulfoton	2,4,4'-Trichlorobiphenyl (PCB 28)	1	0.0166667	0.0166944
Disulfoton	Dichloronaphthalene	1	0.0166667	0.0166944
Disulfoton	Bisphenol F	1	0.0166667	0.0166944
Disulfoton	Ethyl carbamate	-1	0.0166667	0.0166944
Disulfoton	Bergapten	1	0.0166667	0.0166944
Disulfoton	4-Nitrotoluene	-0.974679	0.00481823	0.0166944
Disulfoton	Fusarin C	0.974679	0.00481823	0.0166944
Disulfoton	Fumitremorgin C	1	0.0166667	0.0166944
Disulfoton	Ethinylestradiol	1	0.0166667	0.0166944
Disulfoton	Testosterone	1	0.0166667	0.0166944
Disulfoton	Galaxolide	1	0.0166667	0.0166944
Disulfoton	Clofibric acid	1	0.0166667	0.0166944
Disulfoton	Budesonide	1	0.0166667	0.0166944
Disulfoton	Naproxen	1	0.0166667	0.0166944
Ethion	Parathion	1	0.0166667	0.0166944
Ethion	4-Nitrophenol	1	0.0166667	0.0166944
Ethion	Ethylparaben	1	0.0166667	0.0166944
Ethion	Aldicarb	1	0.0166667	0.0166944
Ethion	Aminocarb	1	0.0166667	0.0166944
Ethion	Fenitrothion	1	0.0166667	0.0166944
Ethion	Ethirimol	1	0.0166667	0.0166944
Ethion	Diethofencarb	1	0.0166667	0.0166944
Ethion	Methylparaben	1	0.0166667	0.0166944
Ethion	Chrysene	1	0.0166667	0.0166944
Ethion	7H-Benzo[c]fluorene	1	0.0166667	0.0166944
Ethion	Chloral	1	0.0166667	0.0166944
Ethion	Cyclopenta[cd]pyrene	1	0.0166667	0.0166944
Ethion	Dimethyl sulfate	1	0.0166667	0.0166944
Ethion	2-Amino-3-methylimidazo(4,5-f)quinoline	1	0.0166667	0.0166944
Ethion	Fusarin C	0.974679	0.00481823	0.0166944
Ethion	Saxitoxin	1	0.0166667	0.0166944
Ethion	Oxybenzone	1	0.0166667	0.0166944
Ethion	4-Hydroxybenzoic acid	1	0.0166667	0.0166944
Parathion	4-Nitrophenol	1	0.0166667	0.0166944
Parathion	Ethylparaben	1	0.0166667	0.0166944
Parathion	Aldicarb	1	0.0166667	0.0166944
Parathion	Aminocarb	1	0.0166667	0.0166944
Parathion	Fenitrothion	1	0.0166667	0.0166944
Parathion	Ethirimol	1	0.0166667	0.0166944
Parathion	Diethofencarb	1	0.0166667	0.0166944
Parathion	Methylparaben	1	0.0166667	0.0166944
Parathion	Chrysene	1	0.0166667	0.0166944
Parathion	7H-Benzo[c]fluorene	1	0.0166667	0.0166944
Parathion	Chloral	1	0.0166667	0.0166944
Parathion	Cyclopenta[cd]pyrene	1	0.0166667	0.0166944
Parathion	Dimethyl sulfate	1	0.0166667	0.0166944
Parathion	2-Amino-3-methylimidazo(4,5-f)quinoline	1	0.0166667	0.0166944
Parathion	Fusarin C	0.974679	0.00481823	0.0166944
Parathion	Saxitoxin	1	0.0166667	0.0166944
Parathion	Oxybenzone	1	0.0166667	0.0166944
Parathion	4-Hydroxybenzoic acid	1	0.0166667	0.0166944
Glyphosate	Benzoic acid	1	0.0166667	0.0166944
Glyphosate	Fenuron	1	0.0166667	0.0166944
Glyphosate	Thiofanox	1	0.0166667	0.0166944
Glyphosate	Prometon	1	0.0166667	0.0166944
Glyphosate	Propoxur	1	0.0166667	0.0166944
Glyphosate	1,2,3,7,8-Pentachlorodibenzo-P-dioxin	1	0.0166667	0.0166944
Glyphosate	Naphthalene	1	0.0166667	0.0166944
Glyphosate	Anthracene	1	0.0166667	0.0166944
Glyphosate	Pyrene	1	0.0166667	0.0166944
Glyphosate	Benzo[b]fluoranthene	1	0.0166667	0.0166944
Glyphosate	2,4,4'-Trichlorobiphenyl (PCB 28)	1	0.0166667	0.0166944
Glyphosate	Dichloronaphthalene	1	0.0166667	0.0166944
Glyphosate	Bisphenol F	1	0.0166667	0.0166944
Glyphosate	Ethyl carbamate	-1	0.0166667	0.0166944
Glyphosate	Bergapten	1	0.0166667	0.0166944
Glyphosate	4-Nitrotoluene	-0.974679	0.00481823	0.0166944
Glyphosate	Fusarin C	0.974679	0.00481823	0.0166944
Glyphosate	Fumitremorgin C	1	0.0166667	0.0166944
Glyphosate	Ethinylestradiol	1	0.0166667	0.0166944
Glyphosate	Testosterone	1	0.0166667	0.0166944
Glyphosate	Galaxolide	1	0.0166667	0.0166944
Glyphosate	Clofibric acid	1	0.0166667	0.0166944
Glyphosate	Budesonide	1	0.0166667	0.0166944
Glyphosate	Naproxen	1	0.0166667	0.0166944
3-Hydroxycarbofuran	Cyromazine	1	0.0166667	0.0166944
3-Hydroxycarbofuran	Dioxacarb	1	0.0166667	0.0166944
3-Hydroxycarbofuran	Fluorene	1	0.0166667	0.0166944
3-Hydroxycarbofuran	Benzo[k]fluoranthene	1	0.0166667	0.0166944
3-Hydroxycarbofuran	Dibenz[a,j]acridine	1	0.0166667	0.0166944
3-Hydroxycarbofuran	Musk xylene	0.974679	0.00481823	0.0166944
3-Hydroxycarbofuran	Octyl-methoxycinnamate	1	0.0166667	0.0166944
3-Hydroxycarbofuran	Aspirin	1	0.0166667	0.0166944
Dinoseb	Dibromoethane	1	0.0166667	0.0166944
4-Nitrophenol	Ethylparaben	1	0.0166667	0.0166944
4-Nitrophenol	Aldicarb	1	0.0166667	0.0166944
4-Nitrophenol	Aminocarb	1	0.0166667	0.0166944
4-Nitrophenol	Fenitrothion	1	0.0166667	0.0166944
4-Nitrophenol	Ethirimol	1	0.0166667	0.0166944
4-Nitrophenol	Diethofencarb	1	0.0166667	0.0166944
4-Nitrophenol	Methylparaben	1	0.0166667	0.0166944
4-Nitrophenol	Chrysene	1	0.0166667	0.0166944
4-Nitrophenol	7H-Benzo[c]fluorene	1	0.0166667	0.0166944
4-Nitrophenol	Chloral	1	0.0166667	0.0166944
4-Nitrophenol	Cyclopenta[cd]pyrene	1	0.0166667	0.0166944
4-Nitrophenol	Dimethyl sulfate	1	0.0166667	0.0166944
4-Nitrophenol	2-Amino-3-methylimidazo(4,5-f)quinoline	1	0.0166667	0.0166944
4-Nitrophenol	Fusarin C	0.974679	0.00481823	0.0166944
4-Nitrophenol	Saxitoxin	1	0.0166667	0.0166944
4-Nitrophenol	Oxybenzone	1	0.0166667	0.0166944
4-Nitrophenol	4-Hydroxybenzoic acid	1	0.0166667	0.0166944
Benzoic acid	Fenuron	1	0.0166667	0.0166944
Benzoic acid	Thiofanox	1	0.0166667	0.0166944
Benzoic acid	Prometon	1	0.0166667	0.0166944
Benzoic acid	Propoxur	1	0.0166667	0.0166944
Benzoic acid	1,2,3,7,8-Pentachlorodibenzo-P-dioxin	1	0.0166667	0.0166944
Benzoic acid	Naphthalene	1	0.0166667	0.0166944
Benzoic acid	Anthracene	1	0.0166667	0.0166944
Benzoic acid	Pyrene	1	0.0166667	0.0166944
Benzoic acid	Benzo[b]fluoranthene	1	0.0166667	0.0166944
Benzoic acid	2,4,4'-Trichlorobiphenyl (PCB 28)	1	0.0166667	0.0166944
Benzoic acid	Dichloronaphthalene	1	0.0166667	0.0166944
Benzoic acid	Bisphenol F	1	0.0166667	0.0166944
Benzoic acid	Ethyl carbamate	-1	0.0166667	0.0166944
Benzoic acid	Bergapten	1	0.0166667	0.0166944
Benzoic acid	4-Nitrotoluene	-0.974679	0.00481823	0.0166944
Benzoic acid	Fusarin C	0.974679	0.00481823	0.0166944
Benzoic acid	Fumitremorgin C	1	0.0166667	0.0166944
Benzoic acid	Ethinylestradiol	1	0.0166667	0.0166944
Benzoic acid	Testosterone	1	0.0166667	0.0166944
Benzoic acid	Galaxolide	1	0.0166667	0.0166944
Benzoic acid	Clofibric acid	1	0.0166667	0.0166944
Benzoic acid	Budesonide	1	0.0166667	0.0166944
Benzoic acid	Naproxen	1	0.0166667	0.0166944
Carbaryl	Metribuzin	1	0.0166667	0.0166944
Carbaryl	Tris(2,3-dibromopropyl) phosphate	1	0.0166667	0.0166944
Carbaryl	3,3',4,4'-Tetrachloroazobenzene	1	0.0166667	0.0166944
Fenuron	Thiofanox	1	0.0166667	0.0166944
Fenuron	Prometon	1	0.0166667	0.0166944
Fenuron	Propoxur	1	0.0166667	0.0166944
Fenuron	1,2,3,7,8-Pentachlorodibenzo-P-dioxin	1	0.0166667	0.0166944
Fenuron	Naphthalene	1	0.0166667	0.0166944
Fenuron	Anthracene	1	0.0166667	0.0166944
Fenuron	Pyrene	1	0.0166667	0.0166944
Fenuron	Benzo[b]fluoranthene	1	0.0166667	0.0166944
Fenuron	2,4,4'-Trichlorobiphenyl (PCB 28)	1	0.0166667	0.0166944
Fenuron	Dichloronaphthalene	1	0.0166667	0.0166944
Fenuron	Bisphenol F	1	0.0166667	0.0166944
Fenuron	Ethyl carbamate	-1	0.0166667	0.0166944
Fenuron	Bergapten	1	0.0166667	0.0166944
Fenuron	4-Nitrotoluene	-0.974679	0.00481823	0.0166944
Fenuron	Fusarin C	0.974679	0.00481823	0.0166944
Fenuron	Fumitremorgin C	1	0.0166667	0.0166944
Fenuron	Ethinylestradiol	1	0.0166667	0.0166944
Fenuron	Testosterone	1	0.0166667	0.0166944
Fenuron	Galaxolide	1	0.0166667	0.0166944
Fenuron	Clofibric acid	1	0.0166667	0.0166944
Fenuron	Budesonide	1	0.0166667	0.0166944
Fenuron	Naproxen	1	0.0166667	0.0166944
Ethylparaben	Aldicarb	1	0.0166667	0.0166944
Ethylparaben	Aminocarb	1	0.0166667	0.0166944
Ethylparaben	Fenitrothion	1	0.0166667	0.0166944
Ethylparaben	Ethirimol	1	0.0166667	0.0166944
Ethylparaben	Diethofencarb	1	0.0166667	0.0166944
Ethylparaben	Methylparaben	1	0.0166667	0.0166944
Ethylparaben	Chrysene	1	0.0166667	0.0166944
Ethylparaben	7H-Benzo[c]fluorene	1	0.0166667	0.0166944
Ethylparaben	Chloral	1	0.0166667	0.0166944
Ethylparaben	Cyclopenta[cd]pyrene	1	0.0166667	0.0166944
Ethylparaben	Dimethyl sulfate	1	0.0166667	0.0166944
Ethylparaben	2-Amino-3-methylimidazo(4,5-f)quinoline	1	0.0166667	0.0166944
Ethylparaben	Fusarin C	0.974679	0.00481823	0.0166944
Ethylparaben	Saxitoxin	1	0.0166667	0.0166944
Ethylparaben	Oxybenzone	1	0.0166667	0.0166944
Ethylparaben	4-Hydroxybenzoic acid	1	0.0166667	0.0166944
Cyromazine	Dioxacarb	1	0.0166667	0.0166944
Cyromazine	Fluorene	1	0.0166667	0.0166944
Cyromazine	Benzo[k]fluoranthene	1	0.0166667	0.0166944
Cyromazine	Dibenz[a,j]acridine	1	0.0166667	0.0166944
Cyromazine	Musk xylene	0.974679	0.00481823	0.0166944
Cyromazine	Octyl-methoxycinnamate	1	0.0166667	0.0166944
Cyromazine	Aspirin	1	0.0166667	0.0166944
Tricyclazole	Isoprocarb	1	0.0166667	0.0166944
Tricyclazole	Aldicarb sulfoxide	1	0.0166667	0.0166944
Tricyclazole	Thidiazuron	1	0.0166667	0.0166944
Tricyclazole	Mexacarbate	1	0.0166667	0.0166944
Tricyclazole	Fenoxycarb	1	0.0166667	0.0166944
Tricyclazole	Pentachloronaphthalene	1	0.0166667	0.0166944
Tricyclazole	1-Nitropyrene	1	0.0166667	0.0166944
Tricyclazole	Citrinin	1	0.0166667	0.0166944
Tricyclazole	Estradiol	1	0.0166667	0.0166944
Tricyclazole	Musk xylene	0.974679	0.00481823	0.0166944
Tricyclazole	Paracetamol	-1	0.0166667	0.0166944
Isoprocarb	Aldicarb sulfoxide	1	0.0166667	0.0166944
Isoprocarb	Thidiazuron	1	0.0166667	0.0166944
Isoprocarb	Mexacarbate	1	0.0166667	0.0166944
Isoprocarb	Fenoxycarb	1	0.0166667	0.0166944
Isoprocarb	Pentachloronaphthalene	1	0.0166667	0.0166944
Isoprocarb	1-Nitropyrene	1	0.0166667	0.0166944
Isoprocarb	Citrinin	1	0.0166667	0.0166944
Isoprocarb	Estradiol	1	0.0166667	0.0166944
Isoprocarb	Musk xylene	0.974679	0.00481823	0.0166944
Isoprocarb	Paracetamol	-1	0.0166667	0.0166944
Aldicarb	Aminocarb	1	0.0166667	0.0166944
Aldicarb	Fenitrothion	1	0.0166667	0.0166944
Aldicarb	Ethirimol	1	0.0166667	0.0166944
Aldicarb	Diethofencarb	1	0.0166667	0.0166944
Aldicarb	Methylparaben	1	0.0166667	0.0166944
Aldicarb	Chrysene	1	0.0166667	0.0166944
Aldicarb	7H-Benzo[c]fluorene	1	0.0166667	0.0166944
Aldicarb	Chloral	1	0.0166667	0.0166944
Aldicarb	Cyclopenta[cd]pyrene	1	0.0166667	0.0166944
Aldicarb	Dimethyl sulfate	1	0.0166667	0.0166944
Aldicarb	2-Amino-3-methylimidazo(4,5-f)quinoline	1	0.0166667	0.0166944
Aldicarb	Fusarin C	0.974679	0.00481823	0.0166944
Aldicarb	Saxitoxin	1	0.0166667	0.0166944
Aldicarb	Oxybenzone	1	0.0166667	0.0166944
Aldicarb	4-Hydroxybenzoic acid	1	0.0166667	0.0166944
Aldicarb sulfoxide	Thidiazuron	1	0.0166667	0.0166944
Aldicarb sulfoxide	Mexacarbate	1	0.0166667	0.0166944
Aldicarb sulfoxide	Fenoxycarb	1	0.0166667	0.0166944
Aldicarb sulfoxide	Pentachloronaphthalene	1	0.0166667	0.0166944
Aldicarb sulfoxide	1-Nitropyrene	1	0.0166667	0.0166944
Aldicarb sulfoxide	Citrinin	1	0.0166667	0.0166944
Aldicarb sulfoxide	Estradiol	1	0.0166667	0.0166944
Aldicarb sulfoxide	Musk xylene	0.974679	0.00481823	0.0166944
Aldicarb sulfoxide	Paracetamol	-1	0.0166667	0.0166944
Aminocarb	Fenitrothion	1	0.0166667	0.0166944
Aminocarb	Ethirimol	1	0.0166667	0.0166944
Aminocarb	Diethofencarb	1	0.0166667	0.0166944
Aminocarb	Methylparaben	1	0.0166667	0.0166944
Aminocarb	Chrysene	1	0.0166667	0.0166944
Aminocarb	7H-Benzo[c]fluorene	1	0.0166667	0.0166944
Aminocarb	Chloral	1	0.0166667	0.0166944
Aminocarb	Cyclopenta[cd]pyrene	1	0.0166667	0.0166944
Aminocarb	Dimethyl sulfate	1	0.0166667	0.0166944
Aminocarb	2-Amino-3-methylimidazo(4,5-f)quinoline	1	0.0166667	0.0166944
Aminocarb	Fusarin C	0.974679	0.00481823	0.0166944
Aminocarb	Saxitoxin	1	0.0166667	0.0166944
Aminocarb	Oxybenzone	1	0.0166667	0.0166944
Aminocarb	4-Hydroxybenzoic acid	1	0.0166667	0.0166944
Fenitrothion	Ethirimol	1	0.0166667	0.0166944
Fenitrothion	Diethofencarb	1	0.0166667	0.0166944
Fenitrothion	Methylparaben	1	0.0166667	0.0166944
Fenitrothion	Chrysene	1	0.0166667	0.0166944
Fenitrothion	7H-Benzo[c]fluorene	1	0.0166667	0.0166944
Fenitrothion	Chloral	1	0.0166667	0.0166944
Fenitrothion	Cyclopenta[cd]pyrene	1	0.0166667	0.0166944
Fenitrothion	Dimethyl sulfate	1	0.0166667	0.0166944
Fenitrothion	2-Amino-3-methylimidazo(4,5-f)quinoline	1	0.0166667	0.0166944
Fenitrothion	Fusarin C	0.974679	0.00481823	0.0166944
Fenitrothion	Saxitoxin	1	0.0166667	0.0166944
Fenitrothion	Oxybenzone	1	0.0166667	0.0166944
Fenitrothion	4-Hydroxybenzoic acid	1	0.0166667	0.0166944
Ethirimol	Diethofencarb	1	0.0166667	0.0166944
Ethirimol	Methylparaben	1	0.0166667	0.0166944
Ethirimol	Chrysene	1	0.0166667	0.0166944
Ethirimol	7H-Benzo[c]fluorene	1	0.0166667	0.0166944
Ethirimol	Chloral	1	0.0166667	0.0166944
Ethirimol	Cyclopenta[cd]pyrene	1	0.0166667	0.0166944
Ethirimol	Dimethyl sulfate	1	0.0166667	0.0166944
Ethirimol	2-Amino-3-methylimidazo(4,5-f)quinoline	1	0.0166667	0.0166944
Ethirimol	Fusarin C	0.974679	0.00481823	0.0166944
Ethirimol	Saxitoxin	1	0.0166667	0.0166944
Ethirimol	Oxybenzone	1	0.0166667	0.0166944
Ethirimol	4-Hydroxybenzoic acid	1	0.0166667	0.0166944
Simetryn	Pyracarbolid	1	0.0166667	0.0166944
Simetryn	Acenaphthylene	-1	0.0166667	0.0166944
Simetryn	Phenanthrene	1	0.0166667	0.0166944
Simetryn	3,3′,4,4′-Tetrachlorobiphenyl (PCB77)	-1	0.0166667	0.0166944
Simetryn	Tetrachloronaphthalene	1	0.0166667	0.0166944
Simetryn	Hexachloronaphthalene	1	0.0166667	0.0166944
Simetryn	Bisphenol A	1	0.0166667	0.0166944
Simetryn	N-Nitrosodiethylamine	1	0.0166667	0.0166944
Simetryn	Styrene oxide	1	0.0166667	0.0166944
Simetryn	Enzacamene	1	0.0166667	0.0166944
Simetryn	Diclofenac	1	0.0166667	0.0166944
Metribuzin	Tris(2,3-dibromopropyl) phosphate	1	0.0166667	0.0166944
Metribuzin	3,3',4,4'-Tetrachloroazobenzene	1	0.0166667	0.0166944
Pymetrozin	Tetrachloroethylene	-1	0.0166667	0.0166944
Pymetrozin	Zeranol	1	0.0166667	0.0166944
Pymetrozin	Salicylic acid	0.974679	0.00481823	0.0166944
Pyracarbolid	Acenaphthylene	-1	0.0166667	0.0166944
Pyracarbolid	Phenanthrene	1	0.0166667	0.0166944
Pyracarbolid	3,3′,4,4′-Tetrachlorobiphenyl (PCB77)	-1	0.0166667	0.0166944
Pyracarbolid	Tetrachloronaphthalene	1	0.0166667	0.0166944
Pyracarbolid	Hexachloronaphthalene	1	0.0166667	0.0166944
Pyracarbolid	Bisphenol A	1	0.0166667	0.0166944
Pyracarbolid	N-Nitrosodiethylamine	1	0.0166667	0.0166944
Pyracarbolid	Styrene oxide	1	0.0166667	0.0166944
Pyracarbolid	Enzacamene	1	0.0166667	0.0166944
Pyracarbolid	Diclofenac	1	0.0166667	0.0166944
Thiofanox	Prometon	1	0.0166667	0.0166944
Thiofanox	Propoxur	1	0.0166667	0.0166944
Thiofanox	1,2,3,7,8-Pentachlorodibenzo-P-dioxin	1	0.0166667	0.0166944
Thiofanox	Naphthalene	1	0.0166667	0.0166944
Thiofanox	Anthracene	1	0.0166667	0.0166944
Thiofanox	Pyrene	1	0.0166667	0.0166944
Thiofanox	Benzo[b]fluoranthene	1	0.0166667	0.0166944
Thiofanox	2,4,4'-Trichlorobiphenyl (PCB 28)	1	0.0166667	0.0166944
Thiofanox	Dichloronaphthalene	1	0.0166667	0.0166944
Thiofanox	Bisphenol F	1	0.0166667	0.0166944
Thiofanox	Ethyl carbamate	-1	0.0166667	0.0166944
Thiofanox	Bergapten	1	0.0166667	0.0166944
Thiofanox	4-Nitrotoluene	-0.974679	0.00481823	0.0166944
Thiofanox	Fusarin C	0.974679	0.00481823	0.0166944
Thiofanox	Fumitremorgin C	1	0.0166667	0.0166944
Thiofanox	Ethinylestradiol	1	0.0166667	0.0166944
Thiofanox	Testosterone	1	0.0166667	0.0166944
Thiofanox	Galaxolide	1	0.0166667	0.0166944
Thiofanox	Clofibric acid	1	0.0166667	0.0166944
Thiofanox	Budesonide	1	0.0166667	0.0166944
Thiofanox	Naproxen	1	0.0166667	0.0166944
Thidiazuron	Mexacarbate	1	0.0166667	0.0166944
Thidiazuron	Fenoxycarb	1	0.0166667	0.0166944
Thidiazuron	Pentachloronaphthalene	1	0.0166667	0.0166944
Thidiazuron	1-Nitropyrene	1	0.0166667	0.0166944
Thidiazuron	Citrinin	1	0.0166667	0.0166944
Thidiazuron	Estradiol	1	0.0166667	0.0166944
Thidiazuron	Musk xylene	0.974679	0.00481823	0.0166944
Thidiazuron	Paracetamol	-1	0.0166667	0.0166944
Mexacarbate	Fenoxycarb	1	0.0166667	0.0166944
Mexacarbate	Pentachloronaphthalene	1	0.0166667	0.0166944
Mexacarbate	1-Nitropyrene	1	0.0166667	0.0166944
Mexacarbate	Citrinin	1	0.0166667	0.0166944
Mexacarbate	Estradiol	1	0.0166667	0.0166944
Mexacarbate	Musk xylene	0.974679	0.00481823	0.0166944
Mexacarbate	Paracetamol	-1	0.0166667	0.0166944
Dioxacarb	Fluorene	1	0.0166667	0.0166944
Dioxacarb	Benzo[k]fluoranthene	1	0.0166667	0.0166944
Dioxacarb	Dibenz[a,j]acridine	1	0.0166667	0.0166944
Dioxacarb	Musk xylene	0.974679	0.00481823	0.0166944
Dioxacarb	Octyl-methoxycinnamate	1	0.0166667	0.0166944
Dioxacarb	Aspirin	1	0.0166667	0.0166944
Prometon	Propoxur	1	0.0166667	0.0166944
Prometon	1,2,3,7,8-Pentachlorodibenzo-P-dioxin	1	0.0166667	0.0166944
Prometon	Naphthalene	1	0.0166667	0.0166944
Prometon	Anthracene	1	0.0166667	0.0166944
Prometon	Pyrene	1	0.0166667	0.0166944
Prometon	Benzo[b]fluoranthene	1	0.0166667	0.0166944
Prometon	2,4,4'-Trichlorobiphenyl (PCB 28)	1	0.0166667	0.0166944
Prometon	Dichloronaphthalene	1	0.0166667	0.0166944
Prometon	Bisphenol F	1	0.0166667	0.0166944
Prometon	Ethyl carbamate	-1	0.0166667	0.0166944
Prometon	Bergapten	1	0.0166667	0.0166944
Prometon	4-Nitrotoluene	-0.974679	0.00481823	0.0166944
Prometon	Fusarin C	0.974679	0.00481823	0.0166944
Prometon	Fumitremorgin C	1	0.0166667	0.0166944
Prometon	Ethinylestradiol	1	0.0166667	0.0166944
Prometon	Testosterone	1	0.0166667	0.0166944
Prometon	Galaxolide	1	0.0166667	0.0166944
Prometon	Clofibric acid	1	0.0166667	0.0166944
Prometon	Budesonide	1	0.0166667	0.0166944
Prometon	Naproxen	1	0.0166667	0.0166944
Siduron	Fusarin C	0.917663	0.0280085	0.0280085
Siduron	Musk xylene	0.917663	0.0280085	0.0280085
Diethofencarb	Methylparaben	1	0.0166667	0.0166944
Diethofencarb	Chrysene	1	0.0166667	0.0166944
Diethofencarb	7H-Benzo[c]fluorene	1	0.0166667	0.0166944
Diethofencarb	Chloral	1	0.0166667	0.0166944
Diethofencarb	Cyclopenta[cd]pyrene	1	0.0166667	0.0166944
Diethofencarb	Dimethyl sulfate	1	0.0166667	0.0166944
Diethofencarb	2-Amino-3-methylimidazo(4,5-f)quinoline	1	0.0166667	0.0166944
Diethofencarb	Fusarin C	0.974679	0.00481823	0.0166944
Diethofencarb	Saxitoxin	1	0.0166667	0.0166944
Diethofencarb	Oxybenzone	1	0.0166667	0.0166944
Diethofencarb	4-Hydroxybenzoic acid	1	0.0166667	0.0166944
Fenoxycarb	Pentachloronaphthalene	1	0.0166667	0.0166944
Fenoxycarb	1-Nitropyrene	1	0.0166667	0.0166944
Fenoxycarb	Citrinin	1	0.0166667	0.0166944
Fenoxycarb	Estradiol	1	0.0166667	0.0166944
Fenoxycarb	Musk xylene	0.974679	0.00481823	0.0166944
Fenoxycarb	Paracetamol	-1	0.0166667	0.0166944
Methylparaben	Chrysene	1	0.0166667	0.0166944
Methylparaben	7H-Benzo[c]fluorene	1	0.0166667	0.0166944
Methylparaben	Chloral	1	0.0166667	0.0166944
Methylparaben	Cyclopenta[cd]pyrene	1	0.0166667	0.0166944
Methylparaben	Dimethyl sulfate	1	0.0166667	0.0166944
Methylparaben	2-Amino-3-methylimidazo(4,5-f)quinoline	1	0.0166667	0.0166944
Methylparaben	Fusarin C	0.974679	0.00481823	0.0166944
Methylparaben	Saxitoxin	1	0.0166667	0.0166944
Methylparaben	Oxybenzone	1	0.0166667	0.0166944
Methylparaben	4-Hydroxybenzoic acid	1	0.0166667	0.0166944
Propoxur	1,2,3,7,8-Pentachlorodibenzo-P-dioxin	1	0.0166667	0.0166944
Propoxur	Naphthalene	1	0.0166667	0.0166944
Propoxur	Anthracene	1	0.0166667	0.0166944
Propoxur	Pyrene	1	0.0166667	0.0166944
Propoxur	Benzo[b]fluoranthene	1	0.0166667	0.0166944
Propoxur	2,4,4'-Trichlorobiphenyl (PCB 28)	1	0.0166667	0.0166944
Propoxur	Dichloronaphthalene	1	0.0166667	0.0166944
Propoxur	Bisphenol F	1	0.0166667	0.0166944
Propoxur	Ethyl carbamate	-1	0.0166667	0.0166944
Propoxur	Bergapten	1	0.0166667	0.0166944
Propoxur	4-Nitrotoluene	-0.974679	0.00481823	0.0166944
Propoxur	Fusarin C	0.974679	0.00481823	0.0166944
Propoxur	Fumitremorgin C	1	0.0166667	0.0166944
Propoxur	Ethinylestradiol	1	0.0166667	0.0166944
Propoxur	Testosterone	1	0.0166667	0.0166944
Propoxur	Galaxolide	1	0.0166667	0.0166944
Propoxur	Clofibric acid	1	0.0166667	0.0166944
Propoxur	Budesonide	1	0.0166667	0.0166944
Propoxur	Naproxen	1	0.0166667	0.0166944
Bentazone	1,2,3,7,8,9-Hexachlorodibenzo-P-dioxin	1	0.0166667	0.0166944
Bentazone	Benzo[a]pyrene	1	0.0166667	0.0166944
Bentazone	3,4,4',5-Tetrachlorobiphenyl (PCB 81)	1	0.0166667	0.0166944
Bentazone	Bisphenol S	1	0.0166667	0.0166944
Bentazone	Zearalenone	1	0.0166667	0.0166944
Bentazone	4-Ipomeanol	1	0.0166667	0.0166944
Bentazone	Norethindrone	1	0.0166667	0.0166944
Bentazone	Tonalid	1	0.0166667	0.0166944
Fenazaquin	Chloronaphthalene	-0.974679	0.00481823	0.0166944
1,2,3,7,8-Pentachlorodibenzo-P-dioxin	Naphthalene	1	0.0166667	0.0166944
1,2,3,7,8-Pentachlorodibenzo-P-dioxin	Anthracene	1	0.0166667	0.0166944
1,2,3,7,8-Pentachlorodibenzo-P-dioxin	Pyrene	1	0.0166667	0.0166944
1,2,3,7,8-Pentachlorodibenzo-P-dioxin	Benzo[b]fluoranthene	1	0.0166667	0.0166944
1,2,3,7,8-Pentachlorodibenzo-P-dioxin	2,4,4'-Trichlorobiphenyl (PCB 28)	1	0.0166667	0.0166944
1,2,3,7,8-Pentachlorodibenzo-P-dioxin	Dichloronaphthalene	1	0.0166667	0.0166944
1,2,3,7,8-Pentachlorodibenzo-P-dioxin	Bisphenol F	1	0.0166667	0.0166944
1,2,3,7,8-Pentachlorodibenzo-P-dioxin	Ethyl carbamate	-1	0.0166667	0.0166944
1,2,3,7,8-Pentachlorodibenzo-P-dioxin	Bergapten	1	0.0166667	0.0166944
1,2,3,7,8-Pentachlorodibenzo-P-dioxin	4-Nitrotoluene	-0.974679	0.00481823	0.0166944
1,2,3,7,8-Pentachlorodibenzo-P-dioxin	Fusarin C	0.974679	0.00481823	0.0166944
1,2,3,7,8-Pentachlorodibenzo-P-dioxin	Fumitremorgin C	1	0.0166667	0.0166944
1,2,3,7,8-Pentachlorodibenzo-P-dioxin	Ethinylestradiol	1	0.0166667	0.0166944
1,2,3,7,8-Pentachlorodibenzo-P-dioxin	Testosterone	1	0.0166667	0.0166944
1,2,3,7,8-Pentachlorodibenzo-P-dioxin	Galaxolide	1	0.0166667	0.0166944
1,2,3,7,8-Pentachlorodibenzo-P-dioxin	Clofibric acid	1	0.0166667	0.0166944
1,2,3,7,8-Pentachlorodibenzo-P-dioxin	Budesonide	1	0.0166667	0.0166944
1,2,3,7,8-Pentachlorodibenzo-P-dioxin	Naproxen	1	0.0166667	0.0166944
1,2,3,7,8,9-Hexachlorodibenzo-P-dioxin	Benzo[a]pyrene	1	0.0166667	0.0166944
1,2,3,7,8,9-Hexachlorodibenzo-P-dioxin	3,4,4',5-Tetrachlorobiphenyl (PCB 81)	1	0.0166667	0.0166944
1,2,3,7,8,9-Hexachlorodibenzo-P-dioxin	Bisphenol S	1	0.0166667	0.0166944
1,2,3,7,8,9-Hexachlorodibenzo-P-dioxin	Zearalenone	1	0.0166667	0.0166944
1,2,3,7,8,9-Hexachlorodibenzo-P-dioxin	4-Ipomeanol	1	0.0166667	0.0166944
1,2,3,7,8,9-Hexachlorodibenzo-P-dioxin	Norethindrone	1	0.0166667	0.0166944
1,2,3,7,8,9-Hexachlorodibenzo-P-dioxin	Tonalid	1	0.0166667	0.0166944
Naphthalene	Anthracene	1	0.0166667	0.0166944
Naphthalene	Pyrene	1	0.0166667	0.0166944
Naphthalene	Benzo[b]fluoranthene	1	0.0166667	0.0166944
Naphthalene	2,4,4'-Trichlorobiphenyl (PCB 28)	1	0.0166667	0.0166944
Naphthalene	Dichloronaphthalene	1	0.0166667	0.0166944
Naphthalene	Bisphenol F	1	0.0166667	0.0166944
Naphthalene	Ethyl carbamate	-1	0.0166667	0.0166944
Naphthalene	Bergapten	1	0.0166667	0.0166944
Naphthalene	4-Nitrotoluene	-0.974679	0.00481823	0.0166944
Naphthalene	Fusarin C	0.974679	0.00481823	0.0166944
Naphthalene	Fumitremorgin C	1	0.0166667	0.0166944
Naphthalene	Ethinylestradiol	1	0.0166667	0.0166944
Naphthalene	Testosterone	1	0.0166667	0.0166944
Naphthalene	Galaxolide	1	0.0166667	0.0166944
Naphthalene	Clofibric acid	1	0.0166667	0.0166944
Naphthalene	Budesonide	1	0.0166667	0.0166944
Naphthalene	Naproxen	1	0.0166667	0.0166944
Acenaphthylene	Phenanthrene	-1	0.0166667	0.0166944
Acenaphthylene	3,3′,4,4′-Tetrachlorobiphenyl (PCB77)	1	0.0166667	0.0166944
Acenaphthylene	Tetrachloronaphthalene	-1	0.0166667	0.0166944
Acenaphthylene	Hexachloronaphthalene	-1	0.0166667	0.0166944
Acenaphthylene	Bisphenol A	-1	0.0166667	0.0166944
Acenaphthylene	N-Nitrosodiethylamine	-1	0.0166667	0.0166944
Acenaphthylene	Styrene oxide	-1	0.0166667	0.0166944
Acenaphthylene	Enzacamene	-1	0.0166667	0.0166944
Acenaphthylene	Diclofenac	-1	0.0166667	0.0166944
Fluorene	Benzo[k]fluoranthene	1	0.0166667	0.0166944
Fluorene	Dibenz[a,j]acridine	1	0.0166667	0.0166944
Fluorene	Musk xylene	0.974679	0.00481823	0.0166944
Fluorene	Octyl-methoxycinnamate	1	0.0166667	0.0166944
Fluorene	Aspirin	1	0.0166667	0.0166944
Anthracene	Pyrene	1	0.0166667	0.0166944
Anthracene	Benzo[b]fluoranthene	1	0.0166667	0.0166944
Anthracene	2,4,4'-Trichlorobiphenyl (PCB 28)	1	0.0166667	0.0166944
Anthracene	Dichloronaphthalene	1	0.0166667	0.0166944
Anthracene	Bisphenol F	1	0.0166667	0.0166944
Anthracene	Ethyl carbamate	-1	0.0166667	0.0166944
Anthracene	Bergapten	1	0.0166667	0.0166944
Anthracene	4-Nitrotoluene	-0.974679	0.00481823	0.0166944
Anthracene	Fusarin C	0.974679	0.00481823	0.0166944
Anthracene	Fumitremorgin C	1	0.0166667	0.0166944
Anthracene	Ethinylestradiol	1	0.0166667	0.0166944
Anthracene	Testosterone	1	0.0166667	0.0166944
Anthracene	Galaxolide	1	0.0166667	0.0166944
Anthracene	Clofibric acid	1	0.0166667	0.0166944
Anthracene	Budesonide	1	0.0166667	0.0166944
Anthracene	Naproxen	1	0.0166667	0.0166944
Phenanthrene	3,3′,4,4′-Tetrachlorobiphenyl (PCB77)	-1	0.0166667	0.0166944
Phenanthrene	Tetrachloronaphthalene	1	0.0166667	0.0166944
Phenanthrene	Hexachloronaphthalene	1	0.0166667	0.0166944
Phenanthrene	Bisphenol A	1	0.0166667	0.0166944
Phenanthrene	N-Nitrosodiethylamine	1	0.0166667	0.0166944
Phenanthrene	Styrene oxide	1	0.0166667	0.0166944
Phenanthrene	Enzacamene	1	0.0166667	0.0166944
Phenanthrene	Diclofenac	1	0.0166667	0.0166944
Pyrene	Benzo[b]fluoranthene	1	0.0166667	0.0166944
Pyrene	2,4,4'-Trichlorobiphenyl (PCB 28)	1	0.0166667	0.0166944
Pyrene	Dichloronaphthalene	1	0.0166667	0.0166944
Pyrene	Bisphenol F	1	0.0166667	0.0166944
Pyrene	Ethyl carbamate	-1	0.0166667	0.0166944
Pyrene	Bergapten	1	0.0166667	0.0166944
Pyrene	4-Nitrotoluene	-0.974679	0.00481823	0.0166944
Pyrene	Fusarin C	0.974679	0.00481823	0.0166944
Pyrene	Fumitremorgin C	1	0.0166667	0.0166944
Pyrene	Ethinylestradiol	1	0.0166667	0.0166944
Pyrene	Testosterone	1	0.0166667	0.0166944
Pyrene	Galaxolide	1	0.0166667	0.0166944
Pyrene	Clofibric acid	1	0.0166667	0.0166944
Pyrene	Budesonide	1	0.0166667	0.0166944
Pyrene	Naproxen	1	0.0166667	0.0166944
Fluoranthene	Methylnitronitrosoguanidine	-1	0.0166667	0.0166944
Fluoranthene	Ibuprofen	1	0.0166667	0.0166944
Chrysene	7H-Benzo[c]fluorene	1	0.0166667	0.0166944
Chrysene	Chloral	1	0.0166667	0.0166944
Chrysene	Cyclopenta[cd]pyrene	1	0.0166667	0.0166944
Chrysene	Dimethyl sulfate	1	0.0166667	0.0166944
Chrysene	2-Amino-3-methylimidazo(4,5-f)quinoline	1	0.0166667	0.0166944
Chrysene	Fusarin C	0.974679	0.00481823	0.0166944
Chrysene	Saxitoxin	1	0.0166667	0.0166944
Chrysene	Oxybenzone	1	0.0166667	0.0166944
Chrysene	4-Hydroxybenzoic acid	1	0.0166667	0.0166944
Benzo[a]pyrene	3,4,4',5-Tetrachlorobiphenyl (PCB 81)	1	0.0166667	0.0166944
Benzo[a]pyrene	Bisphenol S	1	0.0166667	0.0166944
Benzo[a]pyrene	Zearalenone	1	0.0166667	0.0166944
Benzo[a]pyrene	4-Ipomeanol	1	0.0166667	0.0166944
Benzo[a]pyrene	Norethindrone	1	0.0166667	0.0166944
Benzo[a]pyrene	Tonalid	1	0.0166667	0.0166944
Benzo[b]fluoranthene	2,4,4'-Trichlorobiphenyl (PCB 28)	1	0.0166667	0.0166944
Benzo[b]fluoranthene	Dichloronaphthalene	1	0.0166667	0.0166944
Benzo[b]fluoranthene	Bisphenol F	1	0.0166667	0.0166944
Benzo[b]fluoranthene	Ethyl carbamate	-1	0.0166667	0.0166944
Benzo[b]fluoranthene	Bergapten	1	0.0166667	0.0166944
Benzo[b]fluoranthene	4-Nitrotoluene	-0.974679	0.00481823	0.0166944
Benzo[b]fluoranthene	Fusarin C	0.974679	0.00481823	0.0166944
Benzo[b]fluoranthene	Fumitremorgin C	1	0.0166667	0.0166944
Benzo[b]fluoranthene	Ethinylestradiol	1	0.0166667	0.0166944
Benzo[b]fluoranthene	Testosterone	1	0.0166667	0.0166944
Benzo[b]fluoranthene	Galaxolide	1	0.0166667	0.0166944
Benzo[b]fluoranthene	Clofibric acid	1	0.0166667	0.0166944
Benzo[b]fluoranthene	Budesonide	1	0.0166667	0.0166944
Benzo[b]fluoranthene	Naproxen	1	0.0166667	0.0166944
Benzo[k]fluoranthene	Dibenz[a,j]acridine	1	0.0166667	0.0166944
Benzo[k]fluoranthene	Musk xylene	0.974679	0.00481823	0.0166944
Benzo[k]fluoranthene	Octyl-methoxycinnamate	1	0.0166667	0.0166944
Benzo[k]fluoranthene	Aspirin	1	0.0166667	0.0166944
Dibenz[a,j]acridine	Musk xylene	0.974679	0.00481823	0.0166944
Dibenz[a,j]acridine	Octyl-methoxycinnamate	1	0.0166667	0.0166944
Dibenz[a,j]acridine	Aspirin	1	0.0166667	0.0166944
Dibenzo[a,l]pyrene	Styrene	1	0.0166667	0.0166944
7H-Benzo[c]fluorene	Chloral	1	0.0166667	0.0166944
7H-Benzo[c]fluorene	Cyclopenta[cd]pyrene	1	0.0166667	0.0166944
7H-Benzo[c]fluorene	Dimethyl sulfate	1	0.0166667	0.0166944
7H-Benzo[c]fluorene	2-Amino-3-methylimidazo(4,5-f)quinoline	1	0.0166667	0.0166944
7H-Benzo[c]fluorene	Fusarin C	0.974679	0.00481823	0.0166944
7H-Benzo[c]fluorene	Saxitoxin	1	0.0166667	0.0166944
7H-Benzo[c]fluorene	Oxybenzone	1	0.0166667	0.0166944
7H-Benzo[c]fluorene	4-Hydroxybenzoic acid	1	0.0166667	0.0166944
3,3′,4,4′-Tetrachlorobiphenyl (PCB77)	Tetrachloronaphthalene	-1	0.0166667	0.0166944
3,3′,4,4′-Tetrachlorobiphenyl (PCB77)	Hexachloronaphthalene	-1	0.0166667	0.0166944
3,3′,4,4′-Tetrachlorobiphenyl (PCB77)	Bisphenol A	-1	0.0166667	0.0166944
3,3′,4,4′-Tetrachlorobiphenyl (PCB77)	N-Nitrosodiethylamine	-1	0.0166667	0.0166944
3,3′,4,4′-Tetrachlorobiphenyl (PCB77)	Styrene oxide	-1	0.0166667	0.0166944
3,3′,4,4′-Tetrachlorobiphenyl (PCB77)	Enzacamene	-1	0.0166667	0.0166944
3,3′,4,4′-Tetrachlorobiphenyl (PCB77)	Diclofenac	-1	0.0166667	0.0166944
3,4,4',5-Tetrachlorobiphenyl (PCB 81)	Bisphenol S	1	0.0166667	0.0166944
3,4,4',5-Tetrachlorobiphenyl (PCB 81)	Zearalenone	1	0.0166667	0.0166944
3,4,4',5-Tetrachlorobiphenyl (PCB 81)	4-Ipomeanol	1	0.0166667	0.0166944
3,4,4',5-Tetrachlorobiphenyl (PCB 81)	Norethindrone	1	0.0166667	0.0166944
3,4,4',5-Tetrachlorobiphenyl (PCB 81)	Tonalid	1	0.0166667	0.0166944
2,4,4'-Trichlorobiphenyl (PCB 28)	Dichloronaphthalene	1	0.0166667	0.0166944
2,4,4'-Trichlorobiphenyl (PCB 28)	Bisphenol F	1	0.0166667	0.0166944
2,4,4'-Trichlorobiphenyl (PCB 28)	Ethyl carbamate	-1	0.0166667	0.0166944
2,4,4'-Trichlorobiphenyl (PCB 28)	Bergapten	1	0.0166667	0.0166944
2,4,4'-Trichlorobiphenyl (PCB 28)	4-Nitrotoluene	-0.974679	0.00481823	0.0166944
2,4,4'-Trichlorobiphenyl (PCB 28)	Fusarin C	0.974679	0.00481823	0.0166944
2,4,4'-Trichlorobiphenyl (PCB 28)	Fumitremorgin C	1	0.0166667	0.0166944
2,4,4'-Trichlorobiphenyl (PCB 28)	Ethinylestradiol	1	0.0166667	0.0166944
2,4,4'-Trichlorobiphenyl (PCB 28)	Testosterone	1	0.0166667	0.0166944
2,4,4'-Trichlorobiphenyl (PCB 28)	Galaxolide	1	0.0166667	0.0166944
2,4,4'-Trichlorobiphenyl (PCB 28)	Clofibric acid	1	0.0166667	0.0166944
2,4,4'-Trichlorobiphenyl (PCB 28)	Budesonide	1	0.0166667	0.0166944
2,4,4'-Trichlorobiphenyl (PCB 28)	Naproxen	1	0.0166667	0.0166944
Dichloronaphthalene	Bisphenol F	1	0.0166667	0.0166944
Dichloronaphthalene	Ethyl carbamate	-1	0.0166667	0.0166944
Dichloronaphthalene	Bergapten	1	0.0166667	0.0166944
Dichloronaphthalene	4-Nitrotoluene	-0.974679	0.00481823	0.0166944
Dichloronaphthalene	Fusarin C	0.974679	0.00481823	0.0166944
Dichloronaphthalene	Fumitremorgin C	1	0.0166667	0.0166944
Dichloronaphthalene	Ethinylestradiol	1	0.0166667	0.0166944
Dichloronaphthalene	Testosterone	1	0.0166667	0.0166944
Dichloronaphthalene	Galaxolide	1	0.0166667	0.0166944
Dichloronaphthalene	Clofibric acid	1	0.0166667	0.0166944
Dichloronaphthalene	Budesonide	1	0.0166667	0.0166944
Dichloronaphthalene	Naproxen	1	0.0166667	0.0166944
Tetrachloronaphthalene	Hexachloronaphthalene	1	0.0166667	0.0166944
Tetrachloronaphthalene	Bisphenol A	1	0.0166667	0.0166944
Tetrachloronaphthalene	N-Nitrosodiethylamine	1	0.0166667	0.0166944
Tetrachloronaphthalene	Styrene oxide	1	0.0166667	0.0166944
Tetrachloronaphthalene	Enzacamene	1	0.0166667	0.0166944
Tetrachloronaphthalene	Diclofenac	1	0.0166667	0.0166944
Pentachloronaphthalene	1-Nitropyrene	1	0.0166667	0.0166944
Pentachloronaphthalene	Citrinin	1	0.0166667	0.0166944
Pentachloronaphthalene	Estradiol	1	0.0166667	0.0166944
Pentachloronaphthalene	Musk xylene	0.974679	0.00481823	0.0166944
Pentachloronaphthalene	Paracetamol	-1	0.0166667	0.0166944
Hexachloronaphthalene	Bisphenol A	1	0.0166667	0.0166944
Hexachloronaphthalene	N-Nitrosodiethylamine	1	0.0166667	0.0166944
Hexachloronaphthalene	Styrene oxide	1	0.0166667	0.0166944
Hexachloronaphthalene	Enzacamene	1	0.0166667	0.0166944
Hexachloronaphthalene	Diclofenac	1	0.0166667	0.0166944
Bisphenol A	N-Nitrosodiethylamine	1	0.0166667	0.0166944
Bisphenol A	Styrene oxide	1	0.0166667	0.0166944
Bisphenol A	Enzacamene	1	0.0166667	0.0166944
Bisphenol A	Diclofenac	1	0.0166667	0.0166944
Bisphenol F	Ethyl carbamate	-1	0.0166667	0.0166944
Bisphenol F	Bergapten	1	0.0166667	0.0166944
Bisphenol F	4-Nitrotoluene	-0.974679	0.00481823	0.0166944
Bisphenol F	Fusarin C	0.974679	0.00481823	0.0166944
Bisphenol F	Fumitremorgin C	1	0.0166667	0.0166944
Bisphenol F	Ethinylestradiol	1	0.0166667	0.0166944
Bisphenol F	Testosterone	1	0.0166667	0.0166944
Bisphenol F	Galaxolide	1	0.0166667	0.0166944
Bisphenol F	Clofibric acid	1	0.0166667	0.0166944
Bisphenol F	Budesonide	1	0.0166667	0.0166944
Bisphenol F	Naproxen	1	0.0166667	0.0166944
Bisphenol S	Zearalenone	1	0.0166667	0.0166944
Bisphenol S	4-Ipomeanol	1	0.0166667	0.0166944
Bisphenol S	Norethindrone	1	0.0166667	0.0166944
Bisphenol S	Tonalid	1	0.0166667	0.0166944
Chloral	Cyclopenta[cd]pyrene	1	0.0166667	0.0166944
Chloral	Dimethyl sulfate	1	0.0166667	0.0166944
Chloral	2-Amino-3-methylimidazo(4,5-f)quinoline	1	0.0166667	0.0166944
Chloral	Fusarin C	0.974679	0.00481823	0.0166944
Chloral	Saxitoxin	1	0.0166667	0.0166944
Chloral	Oxybenzone	1	0.0166667	0.0166944
Chloral	4-Hydroxybenzoic acid	1	0.0166667	0.0166944
4-Chloro-o-toluidine	p-Hydroxy-meta-chlorophenylpiperazine	1	0.0166667	0.0166944
Cyclopenta[cd]pyrene	Dimethyl sulfate	1	0.0166667	0.0166944
Cyclopenta[cd]pyrene	2-Amino-3-methylimidazo(4,5-f)quinoline	1	0.0166667	0.0166944
Cyclopenta[cd]pyrene	Fusarin C	0.974679	0.00481823	0.0166944
Cyclopenta[cd]pyrene	Saxitoxin	1	0.0166667	0.0166944
Cyclopenta[cd]pyrene	Oxybenzone	1	0.0166667	0.0166944
Cyclopenta[cd]pyrene	4-Hydroxybenzoic acid	1	0.0166667	0.0166944
Dimethyl sulfate	2-Amino-3-methylimidazo(4,5-f)quinoline	1	0.0166667	0.0166944
Dimethyl sulfate	Fusarin C	0.974679	0.00481823	0.0166944
Dimethyl sulfate	Saxitoxin	1	0.0166667	0.0166944
Dimethyl sulfate	Oxybenzone	1	0.0166667	0.0166944
Dimethyl sulfate	4-Hydroxybenzoic acid	1	0.0166667	0.0166944
Ethyl carbamate	Bergapten	-1	0.0166667	0.0166944
Ethyl carbamate	4-Nitrotoluene	0.974679	0.00481823	0.0166944
Ethyl carbamate	Fusarin C	-0.974679	0.00481823	0.0166944
Ethyl carbamate	Fumitremorgin C	-1	0.0166667	0.0166944
Ethyl carbamate	Ethinylestradiol	-1	0.0166667	0.0166944
Ethyl carbamate	Testosterone	-1	0.0166667	0.0166944
Ethyl carbamate	Galaxolide	-1	0.0166667	0.0166944
Ethyl carbamate	Clofibric acid	-1	0.0166667	0.0166944
Ethyl carbamate	Budesonide	-1	0.0166667	0.0166944
Ethyl carbamate	Naproxen	-1	0.0166667	0.0166944
2-Amino-3-methylimidazo(4,5-f)quinoline	Fusarin C	0.974679	0.00481823	0.0166944
2-Amino-3-methylimidazo(4,5-f)quinoline	Saxitoxin	1	0.0166667	0.0166944
2-Amino-3-methylimidazo(4,5-f)quinoline	Oxybenzone	1	0.0166667	0.0166944
2-Amino-3-methylimidazo(4,5-f)quinoline	4-Hydroxybenzoic acid	1	0.0166667	0.0166944
Bergapten	4-Nitrotoluene	-0.974679	0.00481823	0.0166944
Bergapten	Fusarin C	0.974679	0.00481823	0.0166944
Bergapten	Fumitremorgin C	1	0.0166667	0.0166944
Bergapten	Ethinylestradiol	1	0.0166667	0.0166944
Bergapten	Testosterone	1	0.0166667	0.0166944
Bergapten	Galaxolide	1	0.0166667	0.0166944
Bergapten	Clofibric acid	1	0.0166667	0.0166944
Bergapten	Budesonide	1	0.0166667	0.0166944
Bergapten	Naproxen	1	0.0166667	0.0166944
Mercaptobenzothiazole	4-Nitrotoluene	-0.974679	0.00481823	0.0166944
Mercaptobenzothiazole	Tetracycline	1	0.0166667	0.0166944
Methylnitronitrosoguanidine	Ibuprofen	-1	0.0166667	0.0166944
1-Nitropyrene	Citrinin	1	0.0166667	0.0166944
1-Nitropyrene	Estradiol	1	0.0166667	0.0166944
1-Nitropyrene	Musk xylene	0.974679	0.00481823	0.0166944
1-Nitropyrene	Paracetamol	-1	0.0166667	0.0166944
N-Nitrosodiethylamine	Styrene oxide	1	0.0166667	0.0166944
N-Nitrosodiethylamine	Enzacamene	1	0.0166667	0.0166944
N-Nitrosodiethylamine	Diclofenac	1	0.0166667	0.0166944
4-Nitrotoluene	Fusarin C	-0.947368	0.0143795	0.0166944
4-Nitrotoluene	Fumitremorgin C	-0.974679	0.00481823	0.0166944
4-Nitrotoluene	Ethinylestradiol	-0.974679	0.00481823	0.0166944
4-Nitrotoluene	Testosterone	-0.974679	0.00481823	0.0166944
4-Nitrotoluene	Galaxolide	-0.974679	0.00481823	0.0166944
4-Nitrotoluene	Clofibric acid	-0.974679	0.00481823	0.0166944
4-Nitrotoluene	Budesonide	-0.974679	0.00481823	0.0166944
4-Nitrotoluene	Tetracycline	-0.974679	0.00481823	0.0166944
4-Nitrotoluene	Naproxen	-0.974679	0.00481823	0.0166944
Styrene oxide	Enzacamene	1	0.0166667	0.0166944
Styrene oxide	Diclofenac	1	0.0166667	0.0166944
Tetrachloroethylene	Zeranol	-1	0.0166667	0.0166944
Tetrachloroethylene	Salicylic acid	-0.974679	0.00481823	0.0166944
Tris(2,3-dibromopropyl) phosphate	3,3',4,4'-Tetrachloroazobenzene	1	0.0166667	0.0166944
Citrinin	Estradiol	1	0.0166667	0.0166944
Citrinin	Musk xylene	0.974679	0.00481823	0.0166944
Citrinin	Paracetamol	-1	0.0166667	0.0166944
Zearalenone	4-Ipomeanol	1	0.0166667	0.0166944
Zearalenone	Norethindrone	1	0.0166667	0.0166944
Zearalenone	Tonalid	1	0.0166667	0.0166944
Fusarin C	Fumitremorgin C	0.974679	0.00481823	0.0166944
Fusarin C	Saxitoxin	0.974679	0.00481823	0.0166944
Fusarin C	Ethinylestradiol	0.974679	0.00481823	0.0166944
Fusarin C	Testosterone	0.974679	0.00481823	0.0166944
Fusarin C	Galaxolide	0.974679	0.00481823	0.0166944
Fusarin C	Oxybenzone	0.974679	0.00481823	0.0166944
Fusarin C	Clofibric acid	0.974679	0.00481823	0.0166944
Fusarin C	Budesonide	0.974679	0.00481823	0.0166944
Fusarin C	Naproxen	0.974679	0.00481823	0.0166944
Fusarin C	4-Hydroxybenzoic acid	0.974679	0.00481823	0.0166944
Ergotamine	Estrone	1	0.0166667	0.0166944
4-Ipomeanol	Norethindrone	1	0.0166667	0.0166944
4-Ipomeanol	Tonalid	1	0.0166667	0.0166944
Fumitremorgin C	Ethinylestradiol	1	0.0166667	0.0166944
Fumitremorgin C	Testosterone	1	0.0166667	0.0166944
Fumitremorgin C	Galaxolide	1	0.0166667	0.0166944
Fumitremorgin C	Clofibric acid	1	0.0166667	0.0166944
Fumitremorgin C	Budesonide	1	0.0166667	0.0166944
Fumitremorgin C	Naproxen	1	0.0166667	0.0166944
Zeranol	Salicylic acid	0.974679	0.00481823	0.0166944
Saxitoxin	Oxybenzone	1	0.0166667	0.0166944
Saxitoxin	4-Hydroxybenzoic acid	1	0.0166667	0.0166944
Estradiol	Musk xylene	0.974679	0.00481823	0.0166944
Estradiol	Paracetamol	-1	0.0166667	0.0166944
Ethinylestradiol	Testosterone	1	0.0166667	0.0166944
Ethinylestradiol	Galaxolide	1	0.0166667	0.0166944
Ethinylestradiol	Clofibric acid	1	0.0166667	0.0166944
Ethinylestradiol	Budesonide	1	0.0166667	0.0166944
Ethinylestradiol	Naproxen	1	0.0166667	0.0166944
Norethindrone	Tonalid	1	0.0166667	0.0166944
Testosterone	Galaxolide	1	0.0166667	0.0166944
Testosterone	Clofibric acid	1	0.0166667	0.0166944
Testosterone	Budesonide	1	0.0166667	0.0166944
Testosterone	Naproxen	1	0.0166667	0.0166944
Musk xylene	Octyl-methoxycinnamate	0.974679	0.00481823	0.0166944
Musk xylene	Aspirin	0.974679	0.00481823	0.0166944
Musk xylene	Paracetamol	-0.974679	0.00481823	0.0166944
Galaxolide	Clofibric acid	1	0.0166667	0.0166944
Galaxolide	Budesonide	1	0.0166667	0.0166944
Galaxolide	Naproxen	1	0.0166667	0.0166944
Oxybenzone	4-Hydroxybenzoic acid	1	0.0166667	0.0166944
Enzacamene	Diclofenac	1	0.0166667	0.0166944
Octyl-methoxycinnamate	Aspirin	1	0.0166667	0.0166944
Clofibric acid	Budesonide	1	0.0166667	0.0166944
Clofibric acid	Naproxen	1	0.0166667	0.0166944
Budesonide	Naproxen	1	0.0166667	0.0166944
