# Supplementary material for: Precision environmental health monitoring by longitudinal exposome and multi-omics profiling
Source: Genome Res. 2022 Jun;32(6):1199–214. doi: 10.1101/gr.276521.121 (PMC9248886; doi:10.1101/gr.276521.121)
Supplement: Supplemental Material [file supp_gr.276521.121_Supplemental_Data_S3.xlsx]

## Sheet: Node information
Supplemental Data S3. The detailed information of the personal exposome cloud.
node	Class	true_name
dSO2	Environment	dSO2
temperature	Environment	temperature
humid	Environment	humid
genus_Dolosigranulum	Exposome (biological)	Dolosigranulum
genus_Paenibacillus	Exposome (biological)	Paenibacillus
genus_Streptomyces	Exposome (biological)	Streptomyces
genus_Cylindrobasidium	Exposome (biological)	Cylindrobasidium
genus_Phialocephala	Exposome (biological)	Phialocephala
genus_Fibulorhizoctonia	Exposome (biological)	Fibulorhizoctonia
genus_Tricholoma	Exposome (biological)	Tricholoma
genus_Piriformospora	Exposome (biological)	Piriformospora
genus_Erysiphe	Exposome (biological)	Erysiphe
genus_Hirsutella	Exposome (biological)	Hirsutella
genus_Agaricus	Exposome (biological)	Agaricus
genus_Baudoinia	Exposome (biological)	Baudoinia
genus_Aspergillus	Exposome (biological)	Aspergillus
genus_Byssochlamys	Exposome (biological)	Byssochlamys
genus_Neolentinus	Exposome (biological)	Neolentinus
genus_Serendipita	Exposome (biological)	Serendipita
genus_Crepidotus	Exposome (biological)	Crepidotus
genus_Schizophyllum	Exposome (biological)	Schizophyllum
genus_Sclerotinia	Exposome (biological)	Sclerotinia
genus_Galerina	Exposome (biological)	Galerina
genus_Athelia	Exposome (biological)	Athelia
genus_Taphrina	Exposome (biological)	Taphrina
genus_Rutstroemia	Exposome (biological)	Rutstroemia
genus_Cladosporium	Exposome (biological)	Cladosporium
genus_Amorphotheca	Exposome (biological)	Amorphotheca
genus_Sanghuangporus	Exposome (biological)	Sanghuangporus
genus_Botryobasidium	Exposome (biological)	Botryobasidium
genus_Felis	Exposome (biological)	Felis
genus_Termitomyces	Exposome (biological)	Termitomyces
genus_Quercus	Exposome (biological)	Quercus
NM3057	Exposome (chemical)	Acephate
NM1340	Exposome (chemical)	4-Nitrophenol
NM1550	Exposome (chemical)	4-Chloro-o-toluidine
NM3471	Exposome (chemical)	Propoxur
NM3747	Exposome (chemical)	Oxybenzone
NM3850	Exposome (chemical)	Bentazone
NM4272	Exposome (chemical)	Pentachloronaphthalene
NM4280	Exposome (chemical)	Captan
NM4303	Exposome (chemical)	Fenazaquin
PM0320	Exposome (chemical)	N-Nitrosodiethylamine
PM0594	Exposome (chemical)	Diethylene glycol
PM0626	Exposome (chemical)	o-Toluidine
PM0711	Exposome (chemical)	Dimethyl sulfate
PM0799	Exposome (chemical)	Octanoic acid
PM0834	Exposome (chemical)	Chloral
PM0964	Exposome (chemical)	Chloronaphthalene
PM1015	Exposome (chemical)	Ethylparaben
PM1018	Exposome (chemical)	Cyromazine
PM1121	Exposome (chemical)	Anthracene
PM1704	Exposome (chemical)	Dichloronaphthalene
PM1768	Exposome (chemical)	2-Amino-3-methylimidazo(4,5-f)quinoline
PM1810	Exposome (chemical)	Pyrene
PM1880	Exposome (chemical)	p-Hydroxy-meta-chlorophenylpiperazine
PM1944	Exposome (chemical)	Thiofanox
PM1971	Exposome (chemical)	Carbofuran
PM1990	Exposome (chemical)	Prometon
PM2019	Exposome (chemical)	Naproxen
PM2056	Exposome (chemical)	3-Hydroxycarbofuran
PM2201	Exposome (chemical)	Diethofencarb
PM2342	Exposome (chemical)	Butylated triphenyl phosphate
PM2493	Exposome (chemical)	1,2,3,7,8-Pentachlorodibenzo-P-dioxin
PM2541	Exposome (chemical)	Amoxicillin
PM2619	Exposome (chemical)	Ethion
PM2632	Exposome (chemical)	1,2,3,7,8,9-Hexachlorodibenzo-P-dioxin
PM2644	Exposome (chemical)	Bis(2-ethylhexyl) phthalate
PM2688	Exposome (chemical)	Perfluorohexanesulfonic acid (PFHxS)
PM2702	Exposome (chemical)	Azoxystrobin
PM2756	Exposome (chemical)	Diisononyl phthalate
PM2804	Exposome (chemical)	Budesonide
PM2807	Exposome (chemical)	Fusarin C
PM2871	Exposome (chemical)	Perfluorononanoic acid (PFNA)

## Sheet: Edge information
Supplemental Data S3. The detailed information of the personal exposome cloud.
from	to	Correlation	p_value	FDR(-log10)	from_Class	from_true_name	to_Class	to_true_name
genus_Dolosigranulum	dSO2	0.939552	5.428e-05	4.26536	Exposome (biological)	Dolosigranulum	Environment	dSO2
genus_Paenibacillus	temperature	0.915152	0.000466722	3.33094	Exposome (biological)	Paenibacillus	Environment	temperature
genus_Streptomyces	humid	0.924507	0.000129633	3.88729	Exposome (biological)	Streptomyces	Environment	humid
NM3057	humid	-0.90303	0.000880225	3.05541	Exposome (chemical)	Acephate	Environment	humid
NM1340	genus_Cylindrobasidium	-0.914179	0.000213749	3.6701	Exposome (chemical)	4-Nitrophenol	Exposome (biological)	Cylindrobasidium
NM1550	genus_Phialocephala	-0.939394	0	#NUM!	Exposome (chemical)	4-Chloro-o-toluidine	Exposome (biological)	Phialocephala
NM3057	genus_Fibulorhizoctonia	-0.927273	0.000130162	3.88551	Exposome (chemical)	Acephate	Exposome (biological)	Fibulorhizoctonia
NM3471	genus_Tricholoma	-0.914179	0.000213749	3.6701	Exposome (chemical)	Propoxur	Exposome (biological)	Tricholoma
NM3471	genus_Piriformospora	-0.914179	0.000213749	3.6701	Exposome (chemical)	Propoxur	Exposome (biological)	Piriformospora
NM3747	genus_Tricholoma	-0.901908	0.00035929	3.44455	Exposome (chemical)	Oxybenzone	Exposome (biological)	Tricholoma
NM3747	genus_Cylindrobasidium	-0.938721	5.72699e-05	3.94104	Exposome (chemical)	Oxybenzone	Exposome (biological)	Cylindrobasidium
NM3850	genus_Erysiphe	-0.901908	0.00035929	3.44455	Exposome (chemical)	Bentazone	Exposome (biological)	Erysiphe
NM4272	genus_Hirsutella	-0.912946	0.000225959	3.64597	Exposome (chemical)	Pentachloronaphthalene	Exposome (biological)	Hirsutella
NM4280	genus_Agaricus	-0.931705	8.75968e-05	4.05751	Exposome (chemical)	Captan	Exposome (biological)	Agaricus
NM4303	genus_Baudoinia	-0.909741	0.000260078	3.5849	Exposome (chemical)	Fenazaquin	Exposome (biological)	Baudoinia
PM0320	genus_Aspergillus	0.927273	0.000130162	3.88551	Exposome (chemical)	N-Nitrosodiethylamine	Exposome (biological)	Aspergillus
PM0594	genus_Cylindrobasidium	-0.901908	0.00035929	3.44455	Exposome (chemical)	Diethylene glycol	Exposome (biological)	Cylindrobasidium
PM0626	genus_Cylindrobasidium	-0.914179	0.000213749	3.6701	Exposome (chemical)	o-Toluidine	Exposome (biological)	Cylindrobasidium
PM0711	genus_Cylindrobasidium	-0.914179	0.000213749	3.6701	Exposome (chemical)	Dimethyl sulfate	Exposome (biological)	Cylindrobasidium
PM0799	genus_Erysiphe	-0.914179	0.000213749	3.6701	Exposome (chemical)	Octanoic acid	Exposome (biological)	Erysiphe
PM0834	genus_Byssochlamys	0.938721	5.72699e-05	4.24207	Exposome (chemical)	Chloral	Exposome (biological)	Byssochlamys
PM0964	genus_Neolentinus	0.901908	0.00035929	3.44455	Exposome (chemical)	Chloronaphthalene	Exposome (biological)	Neolentinus
PM1015	genus_Tricholoma	-0.938721	5.72699e-05	3.94104	Exposome (chemical)	Ethylparaben	Exposome (biological)	Tricholoma
PM1015	genus_Cylindrobasidium	-0.92645	0.000117071	3.93155	Exposome (chemical)	Ethylparaben	Exposome (biological)	Cylindrobasidium
PM1018	genus_Tricholoma	-0.901908	0.00035929	3.44455	Exposome (chemical)	Cyromazine	Exposome (biological)	Tricholoma
PM1121	genus_Tricholoma	-0.901908	0.00035929	3.44455	Exposome (chemical)	Anthracene	Exposome (biological)	Tricholoma
PM1704	genus_Serendipita	-0.917937	0.00017953	3.74586	Exposome (chemical)	Dichloronaphthalene	Exposome (biological)	Serendipita
PM1768	genus_Tricholoma	-0.901908	0.00035929	3.44455	Exposome (chemical)	2-Amino-3-methylimidazo(4,5-f)quinoline	Exposome (biological)	Tricholoma
PM1768	genus_Cylindrobasidium	-0.938721	5.72699e-05	3.94104	Exposome (chemical)	2-Amino-3-methylimidazo(4,5-f)quinoline	Exposome (biological)	Cylindrobasidium
PM1810	genus_Tricholoma	-0.92645	0.000117071	3.93155	Exposome (chemical)	Pyrene	Exposome (biological)	Tricholoma
PM1880	genus_Crepidotus	-0.901908	0.00035929	3.44455	Exposome (chemical)	p-Hydroxy-meta-chlorophenylpiperazine	Exposome (biological)	Crepidotus
PM1944	genus_Tricholoma	-0.938721	5.72699e-05	3.94104	Exposome (chemical)	Thiofanox	Exposome (biological)	Tricholoma
PM1944	genus_Piriformospora	-0.92645	0.000117071	3.93155	Exposome (chemical)	Thiofanox	Exposome (biological)	Piriformospora
PM1971	genus_Cylindrobasidium	-0.938721	5.72699e-05	4.24207	Exposome (chemical)	Carbofuran	Exposome (biological)	Cylindrobasidium
PM1990	genus_Tricholoma	-0.92645	0.000117071	3.63052	Exposome (chemical)	Prometon	Exposome (biological)	Tricholoma
PM1990	genus_Piriformospora	-0.901908	0.00035929	3.44455	Exposome (chemical)	Prometon	Exposome (biological)	Piriformospora
PM2019	genus_Tricholoma	-0.92645	0.000117071	3.93155	Exposome (chemical)	Naproxen	Exposome (biological)	Tricholoma
PM2056	genus_Hirsutella	-0.944211	3.96088e-05	4.40221	Exposome (chemical)	3-Hydroxycarbofuran	Exposome (biological)	Hirsutella
PM2201	genus_Cylindrobasidium	-0.950992	2.37837e-05	4.62372	Exposome (chemical)	Diethofencarb	Exposome (biological)	Cylindrobasidium
PM2342	genus_Schizophyllum	-0.927273	0.000130162	3.76058	Exposome (chemical)	Butylated triphenyl phosphate	Exposome (biological)	Schizophyllum
PM2342	genus_Sclerotinia	-0.938721	5.72699e-05	3.76058	Exposome (chemical)	Butylated triphenyl phosphate	Exposome (biological)	Sclerotinia
PM2342	genus_Galerina	-0.914179	0.000213749	3.6701	Exposome (chemical)	Butylated triphenyl phosphate	Exposome (biological)	Galerina
PM2342	genus_Athelia	-0.924507	0.000129633	3.76058	Exposome (chemical)	Butylated triphenyl phosphate	Exposome (biological)	Athelia
PM2493	genus_Tricholoma	-0.901908	0.00035929	3.44455	Exposome (chemical)	1,2,3,7,8-Pentachlorodibenzo-P-dioxin	Exposome (biological)	Tricholoma
PM2541	genus_Taphrina	-0.924507	0.000129633	3.88729	Exposome (chemical)	Amoxicillin	Exposome (biological)	Taphrina
PM2619	genus_Rutstroemia	-0.931705	8.75968e-05	4.05751	Exposome (chemical)	Ethion	Exposome (biological)	Rutstroemia
PM2632	genus_Erysiphe	-0.92645	0.000117071	3.93155	Exposome (chemical)	1,2,3,7,8,9-Hexachlorodibenzo-P-dioxin	Exposome (biological)	Erysiphe
PM2644	genus_Cladosporium	-0.90303	0.000880225	3.05541	Exposome (chemical)	Bis(2-ethylhexyl) phthalate	Exposome (biological)	Cladosporium
PM2688	genus_Amorphotheca	0.90303	0.000880225	3.05541	Exposome (chemical)	Perfluorohexanesulfonic acid (PFHxS)	Exposome (biological)	Amorphotheca
PM2702	genus_Tricholoma	-0.914179	0.000213749	3.6701	Exposome (chemical)	Azoxystrobin	Exposome (biological)	Tricholoma
PM2756	genus_Sanghuangporus	-0.90303	0.000880225	3.05541	Exposome (chemical)	Diisononyl phthalate	Exposome (biological)	Sanghuangporus
PM2756	genus_Botryobasidium	-0.90303	0.000880225	3.05541	Exposome (chemical)	Diisononyl phthalate	Exposome (biological)	Botryobasidium
PM2756	genus_Schizophyllum	-0.927273	0.000130162	3.58448	Exposome (chemical)	Diisononyl phthalate	Exposome (biological)	Schizophyllum
PM2756	genus_Tricholoma	-0.950992	2.37837e-05	3.84557	Exposome (chemical)	Diisononyl phthalate	Exposome (biological)	Tricholoma
PM2756	genus_Serendipita	-0.911858	0.000237144	3.4489	Exposome (chemical)	Diisononyl phthalate	Exposome (biological)	Serendipita
PM2756	genus_Piriformospora	-0.92645	0.000117071	3.58448	Exposome (chemical)	Diisononyl phthalate	Exposome (biological)	Piriformospora
PM2804	genus_Felis	-0.906693	0.000295912	3.52884	Exposome (chemical)	Budesonide	Exposome (biological)	Felis
PM2804	genus_Termitomyces	-0.914179	0.000213749	3.52884	Exposome (chemical)	Budesonide	Exposome (biological)	Termitomyces
PM2807	genus_Cylindrobasidium	-0.905226	0.000314383	3.50254	Exposome (chemical)	Fusarin C	Exposome (biological)	Cylindrobasidium
PM2871	genus_Quercus	-0.919199	0.000169006	3.7721	Exposome (chemical)	Perfluorononanoic acid (PFNA)	Exposome (biological)	Quercus
