# Supplementary material for: Precision environmental health monitoring by longitudinal exposome and multi-omics profiling
Source: Genome Res. 2022 Jun;32(6):1199–214. doi: 10.1101/gr.276521.121 (PMC9248886; doi:10.1101/gr.276521.121)
Supplement: Supplemental Material [file supp_gr.276521.121_Supplemental_Data_S4.xlsx]

## Sheet: Node information
Supplemental Data S4. The detailed information of the inter-correlation network of the exposome and internal-multi-omics data.
node	Class	true_name
Glucose._Ser.Plas	Blood test	Glucose._Ser.Plas
Calcium._Ser.Plas	Blood test	Calcium._Ser.Plas
HDL_Cholesterol	Blood test	HDL_Cholesterol
MCH	Blood test	MCH
BASO._.	Blood test	BASO._.
Hematocrit	Blood test	Hematocrit
Platelet_count	Blood test	Platelet_count
RDW	Blood test	RDW
Alk_P.TASE._Total._Ser.Plas	Blood test	Alk_P.TASE._Total._Ser.Plas
Albumin._Ser.Plas	Blood test	Albumin._Ser.Plas
Total_Bilirubin	Blood test	Total_Bilirubin
Hemoglobin_A1c	Blood test	Hemoglobin_A1c
LDL.HDL_Ratio	Blood test	LDL.HDL_Ratio
Creatinine._Ser.Plas	Blood test	Creatinine._Ser.Plas
NEUT._.	Blood test	NEUT._.
NEUT._ABS	Blood test	NEUT._ABS
Sodium._Ser.Plas	Blood test	Sodium._Ser.Plas
LYM._ABS	Blood test	LYM._ABS
Urea_Nitrogen.Ser.Plas	Blood test	Urea_Nitrogen.Ser.Plas
Protein._Total._Ser.Plas	Blood test	Protein._Total._Ser.Plas
Non.HDL_Chol._Calc	Blood test	Non.HDL_Chol._Calc
Cholesterol.HDL_Ratio	Blood test	Cholesterol.HDL_Ratio
MCHC	Blood test	MCHC
Globulin	Blood test	Globulin
LDL_.Calculated.	Blood test	LDL_.Calculated.
EOS._.	Blood test	EOS._.
EOS._ABS	Blood test	EOS._ABS
CO2._Ser.Plas	Blood test	CO2._Ser.Plas
Hemoglobin	Blood test	Hemoglobin
RBC	Blood test	RBC
MONO._.	Blood test	MONO._.
Potassium._Ser.Plas	Blood test	Potassium._Ser.Plas
Anion_Gap	Blood test	Anion_Gap
Cholesterol._Total	Blood test	Cholesterol._Total
BASOS._ABS	Blood test	BASOS._ABS
LYM._.	Blood test	LYM._.
Chloride._Ser.Plas	Blood test	Chloride._Ser.Plas
AST_.SGOT.._Ser.Plas	Blood test	AST_.SGOT.._Ser.Plas
ALT_.SGPT.._Ser.Plas	Blood test	ALT_.SGPT.._Ser.Plas
eGFR	Blood test	eGFR
MCV	Blood test	MCV
MONO._ABS	Blood test	MONO._ABS
WBC	Blood test	WBC
IL17A	Cytokine	IL17A
GROA	Cytokine	GROA
MCP3	Cytokine	MCP3
IL6	Cytokine	IL6
NGF	Cytokine	NGF
IL12P40	Cytokine	IL12P40
IL15	Cytokine	IL15
ICAM1	Cytokine	ICAM1
FASL	Cytokine	FASL
IL27	Cytokine	IL27
IL4	Cytokine	IL4
IL5	Cytokine	IL5
IL7	Cytokine	IL7
IFNB	Cytokine	IFNB
IL13	Cytokine	IL13
IL31	Cytokine	IL31
IFNG	Cytokine	IFNG
GCSF	Cytokine	GCSF
CHEX4	Cytokine	CHEX4
IL23	Cytokine	IL23
EGF	Cytokine	EGF
CD40L	Cytokine	CD40L
LIF	Cytokine	LIF
IP10	Cytokine	IP10
IL21	Cytokine	IL21
CHEX3	Cytokine	CHEX3
IL1B	Cytokine	IL1B
IL17F	Cytokine	IL17F
IL12P70	Cytokine	IL12P70
IL9	Cytokine	IL9
VEGFD	Cytokine	VEGFD
TNFB	Cytokine	TNFB
IL22	Cytokine	IL22
PDGFBB	Cytokine	PDGFBB
VEGF	Cytokine	VEGF
LEPTIN	Cytokine	LEPTIN
SCF	Cytokine	SCF
PAI1	Cytokine	PAI1
IL2	Cytokine	IL2
MCP1	Cytokine	MCP1
SDF1A	Cytokine	SDF1A
IL1A	Cytokine	IL1A
RESISTIN	Cytokine	RESISTIN
BDNF	Cytokine	BDNF
CHEX1	Cytokine	CHEX1
TGFA	Cytokine	TGFA
HGF	Cytokine	HGF
IFNA	Cytokine	IFNA
MIP1A	Cytokine	MIP1A
IL10	Cytokine	IL10
IL1RA	Cytokine	IL1RA
RANTES	Cytokine	RANTES
TNFA	Cytokine	TNFA
MIP1B	Cytokine	MIP1B
TRAIL	Cytokine	TRAIL
IL18	Cytokine	IL18
MCSF	Cytokine	MCSF
FGFB	Cytokine	FGFB
CHEX2	Cytokine	CHEX2
TGFB	Cytokine	TGFB
MIG	Cytokine	MIG
VCAM1	Cytokine	VCAM1
IL8	Cytokine	IL8
GMCSF	Cytokine	GMCSF
dNO2	Environment	dNO2
Overall.AQI.Value	Environment	Overall.AQI.Value
X_Mean_Wind_SpeedKm.h	Environment	X_Mean_Wind_SpeedKm.h
dSO2	Environment	dSO2
dCO	Environment	dCO
temperature	Environment	temperature
exposome_genus_Acidomyces	Exposome (biological)	genus_Acidomyces
exposome_genus_Acinetobacter	Exposome (biological)	genus_Acinetobacter
exposome_genus_Acremonium	Exposome (biological)	genus_Acremonium
exposome_genus_Actinidia	Exposome (biological)	genus_Actinidia
exposome_genus_Actinoplanes	Exposome (biological)	genus_Actinoplanes
exposome_genus_Aegilops	Exposome (biological)	genus_Aegilops
exposome_genus_Aliterella	Exposome (biological)	genus_Aliterella
exposome_genus_Alkanindiges	Exposome (biological)	genus_Alkanindiges
exposome_genus_Ananas	Exposome (biological)	genus_Ananas
exposome_genus_Anthracocystis	Exposome (biological)	genus_Anthracocystis
exposome_genus_Arcticibacter	Exposome (biological)	genus_Arcticibacter
exposome_genus_Armillaria	Exposome (biological)	genus_Armillaria
exposome_genus_Arthrobacter	Exposome (biological)	genus_Arthrobacter
exposome_genus_Arthroderma	Exposome (biological)	genus_Arthroderma
exposome_genus_Ascochyta	Exposome (biological)	genus_Ascochyta
exposome_genus_Ascocoryne	Exposome (biological)	genus_Ascocoryne
exposome_genus_Athelia	Exposome (biological)	genus_Athelia
exposome_genus_Aureobasidium	Exposome (biological)	genus_Aureobasidium
exposome_genus_Auricularia	Exposome (biological)	genus_Auricularia
exposome_genus_Bacillus	Exposome (biological)	genus_Bacillus
exposome_genus_Baeospora	Exposome (biological)	genus_Baeospora
exposome_genus_Biomphalaria	Exposome (biological)	genus_Biomphalaria
exposome_genus_Bipolaris	Exposome (biological)	genus_Bipolaris
exposome_genus_Botrytis	Exposome (biological)	genus_Botrytis
exposome_genus_Brassica	Exposome (biological)	genus_Brassica
exposome_genus_Brevibacillus	Exposome (biological)	genus_Brevibacillus
exposome_genus_Bulleromyces	Exposome (biological)	genus_Bulleromyces
exposome_genus_Burkholderia	Exposome (biological)	genus_Burkholderia
exposome_genus_Byssochlamys	Exposome (biological)	genus_Byssochlamys
exposome_genus_Calocera	Exposome (biological)	genus_Calocera
exposome_genus_Canis	Exposome (biological)	genus_Canis
exposome_genus_Capnocytophaga	Exposome (biological)	genus_Capnocytophaga
exposome_genus_Capronia	Exposome (biological)	genus_Capronia
exposome_genus_Cenococcum	Exposome (biological)	genus_Cenococcum
exposome_genus_Ceraceosorus	Exposome (biological)	genus_Ceraceosorus
exposome_genus_Cercospora	Exposome (biological)	genus_Cercospora
exposome_genus_Chaetomium	Exposome (biological)	genus_Chaetomium
exposome_genus_Chitinophaga	Exposome (biological)	genus_Chitinophaga
exposome_genus_Chryseobacterium	Exposome (biological)	genus_Chryseobacterium
exposome_genus_Clonostachys	Exposome (biological)	genus_Clonostachys
exposome_genus_Colletotrichum	Exposome (biological)	genus_Colletotrichum
exposome_genus_Coniophora	Exposome (biological)	genus_Coniophora
exposome_genus_Coniosporium	Exposome (biological)	genus_Coniosporium
exposome_genus_Cordyceps	Exposome (biological)	genus_Cordyceps
exposome_genus_Cryomyces	Exposome (biological)	genus_Cryomyces
exposome_genus_Curvularia	Exposome (biological)	genus_Curvularia
exposome_genus_Cyphellophora	Exposome (biological)	genus_Cyphellophora
exposome_genus_Cystobasidiopsis	Exposome (biological)	genus_Cystobasidiopsis
exposome_genus_Cystobasidium	Exposome (biological)	genus_Cystobasidium
exposome_genus_Daedalea	Exposome (biological)	genus_Daedalea
exposome_genus_Dendrobium	Exposome (biological)	genus_Dendrobium
exposome_genus_Desmospora	Exposome (biological)	genus_Desmospora
exposome_genus_Desulfosporosinus	Exposome (biological)	genus_Desulfosporosinus
exposome_genus_Diaporthe	Exposome (biological)	genus_Diaporthe
exposome_genus_Dichomitus	Exposome (biological)	genus_Dichomitus
exposome_genus_Dioszegia	Exposome (biological)	genus_Dioszegia
exposome_genus_Diplodia	Exposome (biological)	genus_Diplodia
exposome_genus_Dolosigranulum	Exposome (biological)	genus_Dolosigranulum
exposome_genus_Dothistroma	Exposome (biological)	genus_Dothistroma
exposome_genus_Drechslerella	Exposome (biological)	genus_Drechslerella
exposome_genus_Elaeis	Exposome (biological)	genus_Elaeis
exposome_genus_Emmonsia	Exposome (biological)	genus_Emmonsia
exposome_genus_Endocarpon	Exposome (biological)	genus_Endocarpon
exposome_genus_Enterococcus	Exposome (biological)	genus_Enterococcus
exposome_genus_Epichloe	Exposome (biological)	genus_Epichloe
exposome_genus_Erythrobasidium	Exposome (biological)	genus_Erythrobasidium
exposome_genus_Escherichia	Exposome (biological)	genus_Escherichia
exposome_genus_Eutypa	Exposome (biological)	genus_Eutypa
exposome_genus_Exidia	Exposome (biological)	genus_Exidia
exposome_genus_Exophiala	Exposome (biological)	genus_Exophiala
exposome_genus_Fibrella	Exposome (biological)	genus_Fibrella
exposome_genus_Filobasidiella	Exposome (biological)	genus_Filobasidiella
exposome_genus_Filobasidium	Exposome (biological)	genus_Filobasidium
exposome_genus_Flammulina	Exposome (biological)	genus_Flammulina
exposome_genus_Fomitopsis	Exposome (biological)	genus_Fomitopsis
exposome_genus_Fragaria	Exposome (biological)	genus_Fragaria
exposome_genus_Ganoderma	Exposome (biological)	genus_Ganoderma
exposome_genus_Geotrichum	Exposome (biological)	genus_Geotrichum
exposome_genus_Gloeophyllum	Exposome (biological)	genus_Gloeophyllum
exposome_genus_Glonium	Exposome (biological)	genus_Glonium
exposome_genus_Gongronella	Exposome (biological)	genus_Gongronella
exposome_genus_Gossypium	Exposome (biological)	genus_Gossypium
exposome_genus_Graphilbum	Exposome (biological)	genus_Graphilbum
exposome_genus_Grifola	Exposome (biological)	genus_Grifola
exposome_genus_Gyalolechia	Exposome (biological)	genus_Gyalolechia
exposome_genus_Haloferula	Exposome (biological)	genus_Haloferula
exposome_genus_Hassallia	Exposome (biological)	genus_Hassallia
exposome_genus_Hebeloma	Exposome (biological)	genus_Hebeloma
exposome_genus_Helminthosporium	Exposome (biological)	genus_Helminthosporium
exposome_genus_Heterobasidion	Exposome (biological)	genus_Heterobasidion
exposome_genus_Hibiscus	Exposome (biological)	genus_Hibiscus
exposome_genus_Hirsutella	Exposome (biological)	genus_Hirsutella
exposome_genus_Hordeum	Exposome (biological)	genus_Hordeum
exposome_genus_Humulus	Exposome (biological)	genus_Humulus
exposome_genus_Hymenobacter	Exposome (biological)	genus_Hymenobacter
exposome_genus_Hymenoscyphus	Exposome (biological)	genus_Hymenoscyphus
exposome_genus_Hypsizygus	Exposome (biological)	genus_Hypsizygus
exposome_genus_Hysterium	Exposome (biological)	genus_Hysterium
exposome_genus_Jaapia	Exposome (biological)	genus_Jaapia
exposome_genus_Juglans	Exposome (biological)	genus_Juglans
exposome_genus_Kalmanozyma	Exposome (biological)	genus_Kalmanozyma
exposome_genus_Klebsiella	Exposome (biological)	genus_Klebsiella
exposome_genus_Kwoniella	Exposome (biological)	genus_Kwoniella
exposome_genus_Lactobacillus	Exposome (biological)	genus_Lactobacillus
exposome_genus_Lasallia	Exposome (biological)	genus_Lasallia
exposome_genus_Laurentiella	Exposome (biological)	genus_Laurentiella
exposome_genus_Lecanosticta	Exposome (biological)	genus_Lecanosticta
exposome_genus_Legionella	Exposome (biological)	genus_Legionella
exposome_genus_Lepidopterella	Exposome (biological)	genus_Lepidopterella
exposome_genus_Leptographium	Exposome (biological)	genus_Leptographium
exposome_genus_Leptosphaeria	Exposome (biological)	genus_Leptosphaeria
exposome_genus_Leptoxyphium	Exposome (biological)	genus_Leptoxyphium
exposome_genus_Leucoagaricus	Exposome (biological)	genus_Leucoagaricus
exposome_genus_Leucosporidium	Exposome (biological)	genus_Leucosporidium
exposome_genus_Lotus	Exposome (biological)	genus_Lotus
exposome_genus_Madurella	Exposome (biological)	genus_Madurella
exposome_genus_Magnaporthe	Exposome (biological)	genus_Magnaporthe
exposome_genus_Magnaporthiopsis	Exposome (biological)	genus_Magnaporthiopsis
exposome_genus_Marchantia	Exposome (biological)	genus_Marchantia
exposome_genus_Massilia	Exposome (biological)	genus_Massilia
exposome_genus_Melampsora	Exposome (biological)	genus_Melampsora
exposome_genus_Microdochium	Exposome (biological)	genus_Microdochium
exposome_genus_Microvirga	Exposome (biological)	genus_Microvirga
exposome_genus_Muricauda	Exposome (biological)	genus_Muricauda
exposome_genus_Myceliophthora	Exposome (biological)	genus_Myceliophthora
exposome_genus_Mycena	Exposome (biological)	genus_Mycena
exposome_genus_Mycobacterium	Exposome (biological)	genus_Mycobacterium
exposome_genus_Mycosphaerella	Exposome (biological)	genus_Mycosphaerella
exposome_genus_Necator	Exposome (biological)	genus_Necator
exposome_genus_Neofusicoccum	Exposome (biological)	genus_Neofusicoccum
exposome_genus_Neolentinus	Exposome (biological)	genus_Neolentinus
exposome_genus_Neonectria	Exposome (biological)	genus_Neonectria
exposome_genus_Neurospora	Exposome (biological)	genus_Neurospora
exposome_genus_Niabella	Exposome (biological)	genus_Niabella
exposome_genus_Niastella	Exposome (biological)	genus_Niastella
exposome_genus_Ochroconis	Exposome (biological)	genus_Ochroconis
exposome_genus_Omphalotus	Exposome (biological)	genus_Omphalotus
exposome_genus_Onygena	Exposome (biological)	genus_Onygena
exposome_genus_Oropetium	Exposome (biological)	genus_Oropetium
exposome_genus_Pantoea	Exposome (biological)	genus_Pantoea
exposome_genus_Paraphoma	Exposome (biological)	genus_Paraphoma
exposome_genus_Parastagonospora	Exposome (biological)	genus_Parastagonospora
exposome_genus_Passalora	Exposome (biological)	genus_Passalora
exposome_genus_Paxillus	Exposome (biological)	genus_Paxillus
exposome_genus_Pedobacter	Exposome (biological)	genus_Pedobacter
exposome_genus_Peltaster	Exposome (biological)	genus_Peltaster
exposome_genus_Penstemon	Exposome (biological)	genus_Penstemon
exposome_genus_Peptoclostridium	Exposome (biological)	genus_Peptoclostridium
exposome_genus_Pestalotiopsis	Exposome (biological)	genus_Pestalotiopsis
exposome_genus_Phaeoacremonium	Exposome (biological)	genus_Phaeoacremonium
exposome_genus_Phanerochaete	Exposome (biological)	genus_Phanerochaete
exposome_genus_Phellinus	Exposome (biological)	genus_Phellinus
exposome_genus_Phoma	Exposome (biological)	genus_Phoma
exposome_genus_Phyllosticta	Exposome (biological)	genus_Phyllosticta
exposome_genus_Physarum	Exposome (biological)	genus_Physarum
exposome_genus_Pisolithus	Exposome (biological)	genus_Pisolithus
exposome_genus_Plicaturopsis	Exposome (biological)	genus_Plicaturopsis
exposome_genus_Plutella	Exposome (biological)	genus_Plutella
exposome_genus_Populus	Exposome (biological)	genus_Populus
exposome_genus_Postia	Exposome (biological)	genus_Postia
exposome_genus_Preussia	Exposome (biological)	genus_Preussia
exposome_genus_Proteiniphilum	Exposome (biological)	genus_Proteiniphilum
exposome_genus_Prunus	Exposome (biological)	genus_Prunus
exposome_genus_Pseudobacteroides	Exposome (biological)	genus_Pseudobacteroides
exposome_genus_Pseudomonas	Exposome (biological)	genus_Pseudomonas
exposome_genus_Pseudotsuga	Exposome (biological)	genus_Pseudotsuga
exposome_genus_Pseudozyma	Exposome (biological)	genus_Pseudozyma
exposome_genus_Puccinia	Exposome (biological)	genus_Puccinia
exposome_genus_Pyrenochaeta	Exposome (biological)	genus_Pyrenochaeta
exposome_genus_Pyrenophora	Exposome (biological)	genus_Pyrenophora
exposome_genus_Quercus	Exposome (biological)	genus_Quercus
exposome_genus_Rasamsonia	Exposome (biological)	genus_Rasamsonia
exposome_genus_Reticulascus	Exposome (biological)	genus_Reticulascus
exposome_genus_Rhodotorula	Exposome (biological)	genus_Rhodotorula
exposome_genus_Ricinus	Exposome (biological)	genus_Ricinus
exposome_genus_Rosa	Exposome (biological)	genus_Rosa
exposome_genus_Rosellinia	Exposome (biological)	genus_Rosellinia
exposome_genus_Rothia	Exposome (biological)	genus_Rothia
exposome_genus_Rufibacter	Exposome (biological)	genus_Rufibacter
exposome_genus_Rutstroemia	Exposome (biological)	genus_Rutstroemia
exposome_genus_Salmonella	Exposome (biological)	genus_Salmonella
exposome_genus_Scedosporium	Exposome (biological)	genus_Scedosporium
exposome_genus_Schizopora	Exposome (biological)	genus_Schizopora
exposome_genus_Sediminibacterium	Exposome (biological)	genus_Sediminibacterium
exposome_genus_Segetibacter	Exposome (biological)	genus_Segetibacter
exposome_genus_Serpula	Exposome (biological)	genus_Serpula
exposome_genus_Sistotremastrum	Exposome (biological)	genus_Sistotremastrum
exposome_genus_Sphingobacterium	Exposome (biological)	genus_Sphingobacterium
exposome_genus_Sporosarcina	Exposome (biological)	genus_Sporosarcina
exposome_genus_Sporothrix	Exposome (biological)	genus_Sporothrix
exposome_genus_Staphylococcus	Exposome (biological)	genus_Staphylococcus
exposome_genus_Streptomyces	Exposome (biological)	genus_Streptomyces
exposome_genus_Suillus	Exposome (biological)	genus_Suillus
exposome_genus_Taiwanofungus	Exposome (biological)	genus_Taiwanofungus
exposome_genus_Talaromyces	Exposome (biological)	genus_Talaromyces
exposome_genus_Taphrina	Exposome (biological)	genus_Taphrina
exposome_genus_Tarenaya	Exposome (biological)	genus_Tarenaya
exposome_genus_Termitomyces	Exposome (biological)	genus_Termitomyces
exposome_genus_Terrimonas	Exposome (biological)	genus_Terrimonas
exposome_genus_Tilletiaria	Exposome (biological)	genus_Tilletiaria
exposome_genus_Tolypocladium	Exposome (biological)	genus_Tolypocladium
exposome_genus_Trachymyrmex	Exposome (biological)	genus_Trachymyrmex
exposome_genus_Trametes	Exposome (biological)	genus_Trametes
exposome_genus_Tremella	Exposome (biological)	genus_Tremella
exposome_genus_Trichosporon	Exposome (biological)	genus_Trichosporon
exposome_genus_Tulasnella	Exposome (biological)	genus_Tulasnella
exposome_genus_Ustilago	Exposome (biological)	genus_Ustilago
exposome_genus_Valsa	Exposome (biological)	genus_Valsa
exposome_genus_Verticillium	Exposome (biological)	genus_Verticillium
exposome_genus_Vitis	Exposome (biological)	genus_Vitis
exposome_genus_Wallemia	Exposome (biological)	genus_Wallemia
exposome_genus_Xylona	Exposome (biological)	genus_Xylona
exposome_genus_Yersinia	Exposome (biological)	genus_Yersinia
exposome_genus_Ziziphus	Exposome (biological)	genus_Ziziphus
exposome_genus_Alternaria	Exposome (biological)	genus_Alternaria
exposome_genus_Anoxybacillus	Exposome (biological)	genus_Anoxybacillus
exposome_genus_Arabis	Exposome (biological)	genus_Arabis
exposome_genus_Castanea	Exposome (biological)	genus_Castanea
exposome_genus_Chrysoporthe	Exposome (biological)	genus_Chrysoporthe
exposome_genus_Clavaria	Exposome (biological)	genus_Clavaria
exposome_genus_Clostridium	Exposome (biological)	genus_Clostridium
exposome_genus_Coprinopsis	Exposome (biological)	genus_Coprinopsis
exposome_genus_Corynebacterium	Exposome (biological)	genus_Corynebacterium
exposome_genus_Daucus	Exposome (biological)	genus_Daucus
exposome_genus_Enhydrobacter	Exposome (biological)	genus_Enhydrobacter
exposome_genus_Epilithonimonas	Exposome (biological)	genus_Epilithonimonas
exposome_genus_Felis	Exposome (biological)	genus_Felis
exposome_genus_Fonsecaea	Exposome (biological)	genus_Fonsecaea
exposome_genus_Fraxinus	Exposome (biological)	genus_Fraxinus
exposome_genus_Fusarium	Exposome (biological)	genus_Fusarium
exposome_genus_Gliomastix	Exposome (biological)	genus_Gliomastix
exposome_genus_Haemophilus	Exposome (biological)	genus_Haemophilus
exposome_genus_Isaria	Exposome (biological)	genus_Isaria
exposome_genus_Malassezia	Exposome (biological)	genus_Malassezia
exposome_genus_Marssonina	Exposome (biological)	genus_Marssonina
exposome_genus_Meira	Exposome (biological)	genus_Meira
exposome_genus_Mrakia	Exposome (biological)	genus_Mrakia
exposome_genus_Oceanobacillus	Exposome (biological)	genus_Oceanobacillus
exposome_genus_Oidiodendron	Exposome (biological)	genus_Oidiodendron
exposome_genus_Paenibacillus	Exposome (biological)	genus_Paenibacillus
exposome_genus_Paramecium	Exposome (biological)	genus_Paramecium
exposome_genus_Paraphaeosphaeria	Exposome (biological)	genus_Paraphaeosphaeria
exposome_genus_Penicillium	Exposome (biological)	genus_Penicillium
exposome_genus_Phytophthora	Exposome (biological)	genus_Phytophthora
exposome_genus_Planomicrobium	Exposome (biological)	genus_Planomicrobium
exposome_genus_Pontibacter	Exposome (biological)	genus_Pontibacter
exposome_genus_Propionibacterium	Exposome (biological)	genus_Propionibacterium
exposome_genus_Pseudogymnoascus	Exposome (biological)	genus_Pseudogymnoascus
exposome_genus_Rubrobacter	Exposome (biological)	genus_Rubrobacter
exposome_genus_Sarocladium	Exposome (biological)	genus_Sarocladium
exposome_genus_Spirosoma	Exposome (biological)	genus_Spirosoma
exposome_genus_Stereum	Exposome (biological)	genus_Stereum
exposome_genus_Thermoactinomyces	Exposome (biological)	genus_Thermoactinomyces
exposome_genus_Thermoascus	Exposome (biological)	genus_Thermoascus
exposome_genus_Thermomucor	Exposome (biological)	genus_Thermomucor
exposome_genus_Thielavia	Exposome (biological)	genus_Thielavia
exposome_genus_Venturia	Exposome (biological)	genus_Venturia
exposome_genus_Xeromyces	Exposome (biological)	genus_Xeromyces
exposome_genus_Adhaeribacter	Exposome (biological)	genus_Adhaeribacter
exposome_genus_Albophoma	Exposome (biological)	genus_Albophoma
exposome_genus_Amanita	Exposome (biological)	genus_Amanita
exposome_genus_Amorphotheca	Exposome (biological)	genus_Amorphotheca
exposome_genus_Anabaena	Exposome (biological)	genus_Anabaena
exposome_genus_Basidioascus	Exposome (biological)	genus_Basidioascus
exposome_genus_Betula	Exposome (biological)	genus_Betula
exposome_genus_Beverwykella	Exposome (biological)	genus_Beverwykella
exposome_genus_Biatriospora	Exposome (biological)	genus_Biatriospora
exposome_genus_Botryobasidium	Exposome (biological)	genus_Botryobasidium
exposome_genus_Botryosphaeria	Exposome (biological)	genus_Botryosphaeria
exposome_genus_Calycina	Exposome (biological)	genus_Calycina
exposome_genus_Cellvibrio	Exposome (biological)	genus_Cellvibrio
exposome_genus_Cladonia	Exposome (biological)	genus_Cladonia
exposome_genus_Cladosporium	Exposome (biological)	genus_Cladosporium
exposome_genus_Corynespora	Exposome (biological)	genus_Corynespora
exposome_genus_Cryptococcus	Exposome (biological)	genus_Cryptococcus
exposome_genus_Cyberlindnera	Exposome (biological)	genus_Cyberlindnera
exposome_genus_Cylindrobasidium	Exposome (biological)	genus_Cylindrobasidium
exposome_genus_Dactylonectria	Exposome (biological)	genus_Dactylonectria
exposome_genus_Didymobotryum	Exposome (biological)	genus_Didymobotryum
exposome_genus_Dyadobacter	Exposome (biological)	genus_Dyadobacter
exposome_genus_Enterobacter	Exposome (biological)	genus_Enterobacter
exposome_genus_Fibulorhizoctonia	Exposome (biological)	genus_Fibulorhizoctonia
exposome_genus_Fistulina	Exposome (biological)	genus_Fistulina
exposome_genus_Flavihumibacter	Exposome (biological)	genus_Flavihumibacter
exposome_genus_Fomitiporia	Exposome (biological)	genus_Fomitiporia
exposome_genus_Galerina	Exposome (biological)	genus_Galerina
exposome_genus_Gardnerella	Exposome (biological)	genus_Gardnerella
exposome_genus_Geobacillus	Exposome (biological)	genus_Geobacillus
exposome_genus_Glarea	Exposome (biological)	genus_Glarea
exposome_genus_Globodera	Exposome (biological)	genus_Globodera
exposome_genus_Gymnopus	Exposome (biological)	genus_Gymnopus
exposome_genus_Hortaea	Exposome (biological)	genus_Hortaea
exposome_genus_Laccaria	Exposome (biological)	genus_Laccaria
exposome_genus_Laetiporus	Exposome (biological)	genus_Laetiporus
exposome_genus_Lentinula	Exposome (biological)	genus_Lentinula
exposome_genus_Lymnaea	Exposome (biological)	genus_Lymnaea
exposome_genus_Macrocystidia	Exposome (biological)	genus_Macrocystidia
exposome_genus_Macrostomum	Exposome (biological)	genus_Macrostomum
exposome_genus_Malus	Exposome (biological)	genus_Malus
exposome_genus_Metarhizium	Exposome (biological)	genus_Metarhizium
exposome_genus_Mucilaginibacter	Exposome (biological)	genus_Mucilaginibacter
exposome_genus_Nicotiana	Exposome (biological)	genus_Nicotiana
exposome_genus_Nocardioides	Exposome (biological)	genus_Nocardioides
exposome_genus_Ophiognomonia	Exposome (biological)	genus_Ophiognomonia
exposome_genus_Ornithinibacillus	Exposome (biological)	genus_Ornithinibacillus
exposome_genus_Phlebiopsis	Exposome (biological)	genus_Phlebiopsis
exposome_genus_Piriformospora	Exposome (biological)	genus_Piriformospora
exposome_genus_Pleurotus	Exposome (biological)	genus_Pleurotus
exposome_genus_Pseudocercospora	Exposome (biological)	genus_Pseudocercospora
exposome_genus_Punctularia	Exposome (biological)	genus_Punctularia
exposome_genus_Pyrus	Exposome (biological)	genus_Pyrus
exposome_genus_Rhinocladiella	Exposome (biological)	genus_Rhinocladiella
exposome_genus_Rhizoctonia	Exposome (biological)	genus_Rhizoctonia
exposome_genus_Rhizopogon	Exposome (biological)	genus_Rhizopogon
exposome_genus_Ruminiclostridium	Exposome (biological)	genus_Ruminiclostridium
exposome_genus_Sanghuangporus	Exposome (biological)	genus_Sanghuangporus
exposome_genus_Schizophyllum	Exposome (biological)	genus_Schizophyllum
exposome_genus_Scleroderma	Exposome (biological)	genus_Scleroderma
exposome_genus_Serendipita	Exposome (biological)	genus_Serendipita
exposome_genus_Shiraia	Exposome (biological)	genus_Shiraia
exposome_genus_Sphaerobolus	Exposome (biological)	genus_Sphaerobolus
exposome_genus_Stachybotrys	Exposome (biological)	genus_Stachybotrys
exposome_genus_Stagonospora	Exposome (biological)	genus_Stagonospora
exposome_genus_Synechocystis	Exposome (biological)	genus_Synechocystis
exposome_genus_Thermogemmatispora	Exposome (biological)	genus_Thermogemmatispora
exposome_genus_Tilletia	Exposome (biological)	genus_Tilletia
exposome_genus_Tricholoma	Exposome (biological)	genus_Tricholoma
exposome_genus_Triticum	Exposome (biological)	genus_Triticum
exposome_genus_Volvariella	Exposome (biological)	genus_Volvariella
exposome_genus_Wolfiporia	Exposome (biological)	genus_Wolfiporia
exposome_genus_Ktedonobacter	Exposome (biological)	genus_Ktedonobacter
exposome_genus_Lentinus	Exposome (biological)	genus_Lentinus
exposome_genus_Lignosus	Exposome (biological)	genus_Lignosus
exposome_genus_Obba	Exposome (biological)	genus_Obba
exposome_genus_Picea	Exposome (biological)	genus_Picea
exposome_genus_Pinus	Exposome (biological)	genus_Pinus
exposome_genus_Zymoseptoria	Exposome (biological)	genus_Zymoseptoria
NM1254	Exposome (chemical)	Salicylic acid
NM1446	Exposome (chemical)	Trimethyl Phosphate
NM2680	Exposome (chemical)	Tetrachloroethylene
NM3057	Exposome (chemical)	Acephate
NM3853	Exposome (chemical)	Dinoseb
NM4337	Exposome (chemical)	Zeranol
PM1171	Exposome (chemical)	Triethyl phosphate
PM1307	Exposome (chemical)	Dibromoethane
PM1935	Exposome (chemical)	Pymetrozin
PM2296	Exposome (chemical)	Cyproconazole
PM2541	Exposome (chemical)	Amoxicillin
PM3067	Exposome (chemical)	Tetrabromobisphenol A diallyl ether
NM1550	Exposome (chemical)	4-Chloro-o-toluidine
NM4303	Exposome (chemical)	Fenazaquin
PM1880	Exposome (chemical)	p-Hydroxy-meta-chlorophenylpiperazine
PM2342	Exposome (chemical)	Butylated triphenyl phosphate
PM2549	Exposome (chemical)	Tricresyl phosphate
NM0104	Exposome (chemical)	Ethyl carbamate
NM0522	Exposome (chemical)	Hexanoic acid
NM1145	Exposome (chemical)	4-Nitrotoluene
NM1240	Exposome (chemical)	4-Hydroxybenzoic acid
NM1340	Exposome (chemical)	4-Nitrophenol
NM2328	Exposome (chemical)	Methylparaben
NM4256	Exposome (chemical)	Diclofenac
NM4280	Exposome (chemical)	Captan
NM4281	Exposome (chemical)	Saxitoxin
NM4287	Exposome (chemical)	Perfluorobutanesulfonic acid (PFBS)
NM4327	Exposome (chemical)	Aflatoxin B2
NM4350	Exposome (chemical)	Hexachloronaphthalene
PM0034	Exposome (chemical)	1,4-Dioxane
PM0320	Exposome (chemical)	N-Nitrosodiethylamine
PM0466	Exposome (chemical)	Styrene
PM0594	Exposome (chemical)	Diethylene glycol
PM0626	Exposome (chemical)	o-Toluidine
PM0682	Exposome (chemical)	Styrene oxide
PM0834	Exposome (chemical)	Chloral
PM0964	Exposome (chemical)	Chloronaphthalene
PM0996	Exposome (chemical)	Fenuron
PM1013	Exposome (chemical)	Phthalic acid
PM1040	Exposome (chemical)	4-Ipomeanol
PM1048	Exposome (chemical)	Glyphosate
PM1062	Exposome (chemical)	Decanoic acid
PM1149	Exposome (chemical)	Aspirin
PM1499	Exposome (chemical)	Aldicarb
PM1527	Exposome (chemical)	Diethyltoluamide
PM1704	Exposome (chemical)	Dichloronaphthalene
PM1795	Exposome (chemical)	Bisphenol F
PM1811	Exposome (chemical)	Fluoranthene
PM1888	Exposome (chemical)	Omethoate
PM1890	Exposome (chemical)	Simetryn
PM1900	Exposome (chemical)	Clofibric acid
PM1902	Exposome (chemical)	Metribuzin
PM1926	Exposome (chemical)	7H-Benzo[c]fluorene
PM1927	Exposome (chemical)	Bergapten
PM1936	Exposome (chemical)	Pyracarbolid
PM1956	Exposome (chemical)	Thidiazuron
PM1971	Exposome (chemical)	Carbofuran
PM1976	Exposome (chemical)	Mono-n-butyl phthalate
PM1977	Exposome (chemical)	Mexacarbate
PM1979	Exposome (chemical)	Dioxacarb
PM2111	Exposome (chemical)	1-Nitropyrene
PM2134	Exposome (chemical)	Benzo[a]pyrene
PM2151	Exposome (chemical)	2,4,4'-Trichlorobiphenyl (PCB 28)
PM2187	Exposome (chemical)	Tetrachloronaphthalene
PM2198	Exposome (chemical)	Triisobutyl phosphate
PM2260	Exposome (chemical)	Mono(2-ethylhexyl) phthalate
PM2286	Exposome (chemical)	Testosterone
PM2325	Exposome (chemical)	Dibenzo[a,l]pyrene
PM2383	Exposome (chemical)	3,3',4,4'-Tetrachloroazobenzene
PM2532	Exposome (chemical)	Hydrocortisone
PM2540	Exposome (chemical)	Perfluoroheptanoic acid (PFHpA)
PM2644	Exposome (chemical)	Bis(2-ethylhexyl) phthalate
PM2688	Exposome (chemical)	Perfluorohexanesulfonic acid (PFHxS)
PM2850	Exposome (chemical)	Tris(4-isopropylphenyl) phosphate
PM2871	Exposome (chemical)	Perfluorononanoic acid (PFNA)
PM2654	Exposome (chemical)	2,2',3,3',4,4',5-Heptachlorobiphenyl (PCB 170)
class_Bacilli	Gut microbiome	class_Bacilli
order_Lactobacillales	Gut microbiome	order_Lactobacillales
family_Streptococcaceae	Gut microbiome	family_Streptococcaceae
class_Betaproteobacteria	Gut microbiome	class_Betaproteobacteria
order_Burkholderiales	Gut microbiome	order_Burkholderiales
family_Clostridiaceae.1	Gut microbiome	family_Clostridiaceae.1
family_Rikenellaceae	Gut microbiome	family_Rikenellaceae
family_Sutterellaceae	Gut microbiome	family_Sutterellaceae
genus_Alistipes	Gut microbiome	genus_Alistipes
genus_Clostridium.sensu.stricto	Gut microbiome	genus_Clostridium.sensu.stricto
genus_Eggerthella	Gut microbiome	genus_Eggerthella
genus_Odoribacter	Gut microbiome	genus_Odoribacter
genus_Parasutterella	Gut microbiome	genus_Parasutterella
genus_Roseburia	Gut microbiome	genus_Roseburia
genus_Barnesiella	Gut microbiome	genus_Barnesiella
genus_Clostridium.IV	Gut microbiome	genus_Clostridium.IV
genus_unclassified_Ruminococcaceae	Gut microbiome	genus_unclassified_Ruminococcaceae
family_Peptostreptococcaceae	Gut microbiome	family_Peptostreptococcaceae
family_unclassified_Clostridiales	Gut microbiome	family_unclassified_Clostridiales
genus_Clostridium.XI	Gut microbiome	genus_Clostridium.XI
genus_Clostridium.XlVa	Gut microbiome	genus_Clostridium.XlVa
genus_unclassified_Clostridiales	Gut microbiome	genus_unclassified_Clostridiales
phylum_Verrucomicrobia	Gut microbiome	phylum_Verrucomicrobia
class_Verrucomicrobiae	Gut microbiome	class_Verrucomicrobiae
order_Verrucomicrobiales	Gut microbiome	order_Verrucomicrobiales
family_Verrucomicrobiaceae	Gut microbiome	family_Verrucomicrobiaceae
genus_Akkermansia	Gut microbiome	genus_Akkermansia
genus_Oscillibacter	Gut microbiome	genus_Oscillibacter
genus_Parabacteroides	Gut microbiome	genus_Parabacteroides
genus_unclassified_Coriobacteriaceae	Gut microbiome	genus_unclassified_Coriobacteriaceae
family_Porphyromonadaceae	Gut microbiome	family_Porphyromonadaceae
family_Veillonellaceae	Gut microbiome	family_Veillonellaceae
genus_Butyricimonas	Gut microbiome	genus_Butyricimonas
genus_Veillonella	Gut microbiome	genus_Veillonella
class_unclassified_Firmicutes	Gut microbiome	class_unclassified_Firmicutes
order_unclassified_Firmicutes	Gut microbiome	order_unclassified_Firmicutes
family_unclassified_Firmicutes	Gut microbiome	family_unclassified_Firmicutes
genus_unclassified_Firmicutes	Gut microbiome	genus_unclassified_Firmicutes
genus_Faecalibacterium	Gut microbiome	genus_Faecalibacterium
phylum_unclassified_Bacteria	Gut microbiome	phylum_unclassified_Bacteria
class_unclassified_Bacteria	Gut microbiome	class_unclassified_Bacteria
order_unclassified_Bacteria	Gut microbiome	order_unclassified_Bacteria
family_unclassified_Bacteria	Gut microbiome	family_unclassified_Bacteria
genus_unclassified_Bacteria	Gut microbiome	genus_unclassified_Bacteria
family_Prevotellaceae	Gut microbiome	family_Prevotellaceae
genus_unclassified_Erysipelotrichaceae	Gut microbiome	genus_unclassified_Erysipelotrichaceae
genus_Butyricicoccus	Gut microbiome	genus_Butyricicoccus
genus_Clostridium.XlVb	Gut microbiome	genus_Clostridium.XlVb
family_Clostridiales_Incertae.Sedis.XIII	Gut microbiome	family_Clostridiales_Incertae.Sedis.XIII
genus_Anaerovorax	Gut microbiome	genus_Anaerovorax
genus_Bilophila	Gut microbiome	genus_Bilophila
phylum_Bacteroidetes	Gut microbiome	phylum_Bacteroidetes
class_Bacteroidia	Gut microbiome	class_Bacteroidia
order_Bacteroidales	Gut microbiome	order_Bacteroidales
family_Bacteroidaceae	Gut microbiome	family_Bacteroidaceae
genus_Bacteroides	Gut microbiome	genus_Bacteroides
genus_unclassified_Clostridiales_Incertae.Sedis.XIII	Gut microbiome	genus_unclassified_Clostridiales_Incertae.Sedis.XIII
genus_Dorea	Gut microbiome	genus_Dorea
phylum_Firmicutes	Gut microbiome	phylum_Firmicutes
class_Clostridia	Gut microbiome	class_Clostridia
class_Gammaproteobacteria	Gut microbiome	class_Gammaproteobacteria
order_Clostridiales	Gut microbiome	order_Clostridiales
order_Enterobacteriales	Gut microbiome	order_Enterobacteriales
family_Enterobacteriaceae	Gut microbiome	family_Enterobacteriaceae
genus_Coprococcus	Gut microbiome	genus_Coprococcus
genus_Holdemania	Gut microbiome	genus_Holdemania
phylum_Proteobacteria	Gut microbiome	phylum_Proteobacteria
family_Ruminococcaceae	Gut microbiome	family_Ruminococcaceae
genus_Flavonifractor	Gut microbiome	genus_Flavonifractor
genus_Streptococcus	Gut microbiome	genus_Streptococcus
phylum_Actinobacteria	Gut microbiome	phylum_Actinobacteria
class_Actinobacteria	Gut microbiome	class_Actinobacteria
class_Erysipelotrichia	Gut microbiome	class_Erysipelotrichia
order_Coriobacteriales	Gut microbiome	order_Coriobacteriales
order_Erysipelotrichales	Gut microbiome	order_Erysipelotrichales
family_Coriobacteriaceae	Gut microbiome	family_Coriobacteriaceae
family_Erysipelotrichaceae	Gut microbiome	family_Erysipelotrichaceae
genus_Lachnospiracea_incertae_sedis	Gut microbiome	genus_Lachnospiracea_incertae_sedis
genus_Prevotella	Gut microbiome	genus_Prevotella
genus_Ruminococcus	Gut microbiome	genus_Ruminococcus
genus_Anaerotruncus	Gut microbiome	genus_Anaerotruncus
genus_Clostridium.XVIII	Gut microbiome	genus_Clostridium.XVIII
class_Deltaproteobacteria	Gut microbiome	class_Deltaproteobacteria
order_Desulfovibrionales	Gut microbiome	order_Desulfovibrionales
family_Desulfovibrionaceae	Gut microbiome	family_Desulfovibrionaceae
genus_unclassified_Porphyromonadaceae	Gut microbiome	genus_unclassified_Porphyromonadaceae
genus_Blautia	Gut microbiome	genus_Blautia
genus_Pseudoflavonifractor	Gut microbiome	genus_Pseudoflavonifractor
class_Negativicutes	Gut microbiome	class_Negativicutes
order_Selenomonadales	Gut microbiome	order_Selenomonadales
family_Acidaminococcaceae	Gut microbiome	family_Acidaminococcaceae
family_Lachnospiraceae	Gut microbiome	family_Lachnospiraceae
genus_Collinsella	Gut microbiome	genus_Collinsella
genus_Erysipelotrichaceae_incertae_sedis	Gut microbiome	genus_Erysipelotrichaceae_incertae_sedis
genus_Phascolarctobacterium	Gut microbiome	genus_Phascolarctobacterium
genus_unclassified_Lachnospiraceae	Gut microbiome	genus_unclassified_Lachnospiraceae
pHILIC_137.0457_3.1	Metabolome	Hypoxanthine
pHILIC_104.0705_8.1	Metabolome	2-Aminobutyrate
pHILIC_146.1175_11	Metabolome	Acetylcholine
pHILIC_276.1548_13.2	Metabolome	gamma-glutamyl-epsilon-lysine
nHILIC_303.2327_1	Metabolome	C20:4 FA
nHILIC_230.0127_2.1	Metabolome	C8H9NO5S
nHILIC_181.0367_6.8	Metabolome	1-Methyluric acid
nHILIC_132.0302_8.3	Metabolome	Iminodiacetate (IDA)
nHILIC_183.0294_2.1	Metabolome	C8H8O5
nHILIC_281.089_2.2	Metabolome	C11H14N4O5
nHILIC_165.0404_7.8	Metabolome	Arabonate | Xylonate(3)
nHILIC_287.052_8.1	Metabolome	Orotidine
nHILIC_349.0752_8.5	Metabolome	C13H18O11
nHILIC_275.0649_8.9	Metabolome	Unknown_nHILIC_275.0649_8.9
nHILIC_485.1492_3.9	Metabolome	C18H29O15
nHILIC_257.0777_2.2	Metabolome	5-methyluridine (ribothymidine)
nHILIC_137.0243_1	Metabolome	Hydroxybenzoic acid
pRPLC_195.0875_4.6	Metabolome	Caffeine
pRPLC_302.2328_5.6	Metabolome	C9:0 AC
pRPLC_505.2774_9.3	Metabolome	C24H36N6O6
nRPLC_213.1497_8.1	Metabolome	"C12:1,OH FA"
nRPLC_229.1445_7.4	Metabolome	"C12:0,DC FA"
nRPLC_165.0418_1.9	Metabolome	1-Methylxanthine
nRPLC_169.1234_8	Metabolome	C10:1 FA(1)
nRPLC_215.1653_8.4	Metabolome	"C12:0,OH FA(1)"
nRPLC_281.1394_9	Metabolome	C15H22O5
nRPLC_409.3322_11.2	Metabolome	MG(22:2)
nRPLC_489.3582_11	Metabolome	C30H50O5(1)
nRPLC_507.3686_10.6	Metabolome	C30H52O6
nRPLC_453.3221_10.1	Metabolome	C26H46O6(1)
nRPLC_295.2278_9.9	Metabolome	"C18:2,OH FA"
nRPLC_315.2541_9.4	Metabolome	MG(15:0)(1)
nRPLC_267.1966_9.2	Metabolome	"C16:2,OH FA"
nRPLC_239.1653_8.5	Metabolome	"C14:2,OH FA"
nRPLC_267.1238_8.3	Metabolome	C14H20O5
nRPLC_209.1184_8.2	Metabolome	C12H18O3(2)
nRPLC_213.1498_7.8	Metabolome	"C12:1, OH FA"
nRPLC_187.1339_7.1	Metabolome	"C10:0,OH FA(1)"
nRPLC_411.127_3.6	Metabolome	N6-Carbamoyl-L-threonyladenosine
nRPLC_203.002_1.9	Metabolome	4-Methylcatechol sulfate
pHILIC_200.128_6.8	Metabolome	C10H17NO3
nHILIC_267.0719_4.2	Metabolome	C10H12N4O5
nHILIC_335.0495_8.3	Metabolome	Uric acid
nHILIC_459.1407_2.1	Metabolome	C22H24N2O9
nHILIC_87.045_4.2	Metabolome	Butyric acid|Isobutyric acid
nHILIC_129.0192_7.6	Metabolome	C5H6O4
nHILIC_116.0352_7.5	Metabolome	C4H7NO3
nHILIC_160.0615_7.2	Metabolome	N-acetylthreonine
nHILIC_539.2489_6.5	Metabolome	C27H40O11
nHILIC_89.0243_5.8	Metabolome	L-Lactic acid
pRPLC_246.17_1.9	Metabolome	C5:0 AC
pRPLC_357.2788_9.5	Metabolome	C24H38O3(2)
nRPLC_230.9968_4.1	Metabolome	methyl-4-hydroxybenzoate sulfate
nRPLC_391.2856_9.5	Metabolome	Chenodeoxycholic Acid(2)
nRPLC_431.3166_10.4	Metabolome	C27H44O4(2)
nRPLC_243.1601_8.2	Metabolome	"C13:0,DC FA(3)"
nRPLC_247.1703_9.4	Metabolome	C16:4 FA
nRPLC_397.2054_9.6	Metabolome	Pregnanolone sulfate
nRPLC_297.1343_8.3	Metabolome	C15H22O6(3)
nRPLC_577.255_7	Metabolome	C32H38N2O8
pHILIC_257.1127_2	Metabolome	C11H16N2O5
pHILIC_360.2736_6.1	Metabolome	"C18:0,OH AC"
nHILIC_194.0458_6.9	Metabolome	Hydroxyhippurate(2)
nHILIC_238.0929_7.3	Metabolome	ethyl glucuronide
nHILIC_280.0754_8.9	Metabolome	Unknown_nHILIC_280.0754_8.9 related to nHILIC_275.0649_8.9
nHILIC_194.0458_4.6	Metabolome	Hydroxyhippurate(3)
nHILIC_204.9811_1.1	Metabolome	"1,2,3-benzenetriol sulfate"
pRPLC_269.1385_8	Metabolome	C14H20O5(2)_pos
nRPLC_187.134_7.5	Metabolome	"C10:0,OH FA(2)"
nRPLC_513.27_8.6	Metabolome	C26H42O10
nRPLC_165.0557_3.2	Metabolome	Dihydro-3-coumaric acid
nRPLC_159.1026_5.1	Metabolome	"C8:0,OH FA(1)"
nRPLC_499.2911_8.7	Metabolome	C26H44O9
nRPLC_293.2122_9.9	Metabolome	"C18:3,OH FA(1)"
nRPLC_467.2649_8.8	Metabolome	"5alpha-Androstan-3alpha,17beta-diol 17-glucuronide(2)"
pHILIC_750.5399_3.1	Metabolome	PE(P-38:5)(2)
pHILIC_221.0917_6.6	Metabolome	C11H12N2O3(2)
pHILIC_171.0763_7.5	Metabolome	C7H10N2O3
pHILIC_147.0763_9.7	Metabolome	L-Glutamine
pHILIC_249.1077_10.8	Metabolome	gamma-glutamylthreonine(2)
pHILIC_203.1501_13.6	Metabolome	Symmetric dimethylarginine
pHILIC_175.1188_15.1	Metabolome	L-Arginine
pHILIC_309.1649_15.6	Metabolome	Fructoselysine
nHILIC_243.0509_8.1	Metabolome	C10H12O7
nHILIC_135.0299_7.9	Metabolome	Threonic acid
nHILIC_165.0405_8.5	Metabolome	Arabonate | Xylonate(1)
nHILIC_296.0378_11	Metabolome	L-Cysteinylglycine disulfide
nHILIC_146.0276_5.1	Metabolome	C8H5NO2
nHILIC_133.0506_2.3	Metabolome	"2,3-Dihydroxyvaleric acid(2)"
nHILIC_179.0348_2.2	Metabolome	4-Hydroxyphenylpyruvic acid
pRPLC_260.1858_3.3	Metabolome	C6:0 AC
pRPLC_413.207_4.8	Metabolome	C23H28N2O5
pRPLC_316.2484_6.6	Metabolome	C10:0 AC
pRPLC_227.0914_6.8	Metabolome	C11H14O5
pRPLC_464.1915_7	Metabolome	C23H29NO9
pRPLC_342.2639_7.2	Metabolome	C12:1 AC
pRPLC_239.1642_8.9	Metabolome	C14H22O3
nRPLC_171.1027_5.6	Metabolome	"C9:1,OH FA"
nRPLC_333.2073_7.6	Metabolome	"C20:4,DC FA"
nRPLC_131.0714_1.6	Metabolome	(S)-(-)-2-Hydroxyisocaproic acid
nRPLC_169.1233_8.2	Metabolome	C10:1 FA(2)
nRPLC_243.1964_9.6	Metabolome	"C14:0,OH FA(2)"
nRPLC_319.2278_9.8	Metabolome	"C20:4,OH FA(2)"
nRPLC_445.3324_11.4	Metabolome	C28H46O4(2)
nRPLC_199.1704_9.5	Metabolome	C12:0 FA(1)
nRPLC_448.3069_9.4	Metabolome	Chenodeoxycholic acid glycine conjugate(1)
nRPLC_223.1704_9.4	Metabolome	C14:2 FA
nRPLC_243.1965_9.3	Metabolome	"C14:0,OH FA(1)"
nRPLC_241.181_9	Metabolome	"C14:1,OH FA(1)"
nRPLC_197.1547_9	Metabolome	C12:1 FA(2)
nRPLC_514.2853_8.8	Metabolome	Taurocholic acid(2)
nRPLC_187.0976_5.4	Metabolome	"C9:0,DC FA (Azelaic acid)"
pHILIC_189.1596_18.3	Metabolome	"N6,N6,N6-Trimethyl-L-lysine"
nHILIC_212.0022_3	Metabolome	3-indoxyl sulfate
pRPLC_431.3153_10.3	Metabolome	C27H42O4
pRPLC_457.2832_11	Metabolome	C24H40O8
nRPLC_323.2592_10.4	Metabolome	"C20:2,OH FA"
nRPLC_539.2489_8.8	Metabolome	Tetrahydroaldosterone-3-glucuronide(2)
nRPLC_183.1025_5.1	Metabolome	C10H16O3(3)
pHILIC_114.0661_2.5	Metabolome	Creatinine
pHILIC_298.1139_4.7	Metabolome	1-Methylguanosine
pHILIC_158.1174_6.2	Metabolome	Homostachydrine
pHILIC_205.0969_6.7	Metabolome	L-Tryptophan
pHILIC_150.0581_7	Metabolome	L-Methionine
pHILIC_221.0918_7.5	Metabolome	C11H12N2O3(1)
pHILIC_130.0862_7.6	Metabolome	Pipecolic acid
pHILIC_182.081_7.7	Metabolome	L-Tyrosine
pHILIC_188.128_8	Metabolome	C9H17NO3
pHILIC_269.1239_8.3	Metabolome	Acetylcarnosine
pHILIC_245.1856_12.4	Metabolome	C12H24N2O3
nHILIC_188.9862_0.9	Metabolome	Catechol sulfate
nHILIC_176.0387_4.9	Metabolome	N-formylmethionine
nHILIC_157.0366_6.1	Metabolome	Allantoin
nHILIC_177.0339_6.7	Metabolome	Cys Gly
nHILIC_74.0246_9.6	Metabolome	Glycine
nHILIC_131.0461_9.7	Metabolome	L-Asparagine
nHILIC_471.1343_11.8	Metabolome	C16H26N4O11
nHILIC_300.0394_7.2	Metabolome	C8H15NO9S
nHILIC_103.0036_4	Metabolome	C3H4O4
pRPLC_244.1544_1.7	Metabolome	C5:1 AC
pRPLC_146.06_3	Metabolome	4-formyl Indole(2)
pRPLC_181.0719_3.4	Metabolome	Theophylline
pRPLC_352.1657_3.7	Metabolome	Phenylalanyl-Tryptophan
nRPLC_159.1027_5.5	Metabolome	"C8:0,OH FA(2)"
nRPLC_209.0819_5.9	Metabolome	C11H14O4(1)
nRPLC_227.1289_7.3	Metabolome	"C12:1,DC FA(1)"
nRPLC_257.176_8.5	Metabolome	"C14:0,DC FA(1)"
nRPLC_265.2171_10.3	Metabolome	C17:0 FA(2)
nRPLC_433.2595_11.1	Metabolome	C25H38O6
nRPLC_327.2538_10.5	Metabolome	MG(16:1)
nRPLC_285.2071_9.2	Metabolome	"C16:0,DC FA(2)"
nRPLC_255.1603_8.1	Metabolome	C14H24O4
nRPLC_541.2651_7	Metabolome	C27H42O11(3)
nRPLC_151.04_2.3	Metabolome	2-Hydroxyphenylacetate
pHILIC_166.0861_6.2	Metabolome	L-Phenylalanine
pHILIC_170.0923_8.5	Metabolome	1-Methylhistidine
pHILIC_350.1185_11.5	Metabolome	C12H19N3O9
pHILIC_337.1234_11.6	Metabolome	C12H20N2O9
pHILIC_147.1126_15.9	Metabolome	L-Lysine
nHILIC_243.0621_3.4	Metabolome	Uridine
nHILIC_327.2328_1	Metabolome	C22:6 FA
nHILIC_111.0199_3.4	Metabolome	Uracil
nHILIC_177.0226_3.6	Metabolome	C6H10O4S
nHILIC_481.244_5.2	Metabolome	11-beta-Hydroxyandrosterone-3-glucuronide
nHILIC_274.1407_13.3	Metabolome	Epsilon-(gamma-Glutamyl)-lysine
nHILIC_168.0778_10.2	Metabolome	3-Methyl-L-histidine
nHILIC_85.0294_7.6	Metabolome	C4H6O2
nHILIC_361.1254_3.3	Metabolome	C14H22N2O9
pRPLC_162.1123_0.6	Metabolome	L-Carnitine
pRPLC_100.0756_1.2	Metabolome	2-Piperidinone
pRPLC_267.1228_8.3	Metabolome	C14H18O5(1)
pRPLC_580.4347_11.8	Metabolome	LysoPC(22:0)
nRPLC_514.2838_9.6	Metabolome	Taurocholic acid(1)
nRPLC_473.3632_11.4	Metabolome	C30H50O4
nRPLC_407.2438_8.8	Metabolome	C23H36O6
nRPLC_389.2699_8.8	Metabolome	C24H38O4
nRPLC_297.2435_10.2	Metabolome	"C18:1,OH FA(1)"
nRPLC_498.2892_10.3	Metabolome	Tauroursodeoxycholic acid
nRPLC_293.2123_9.6	Metabolome	"C18:3,OH FA(2)"
nRPLC_163.0765_7.4	Metabolome	Phenylbutyric acid
nRPLC_495.2235_6.2	Metabolome	C25H36O10
nRPLC_209.0814_5.3	Metabolome	C11H14O4(2)
pHILIC_144.1018_6.7	Metabolome	Proline betaine
pHILIC_157.0607_8.3	Metabolome	Imidazolelactic acid
pHILIC_229.1544_10.4	Metabolome	C11H20N2O3(2)
nHILIC_167.0349_1.3	Metabolome	5-Methoxysalicylic acid
nHILIC_239.0164_12.1	Metabolome	L-Cystine
nHILIC_269.0875_7.6	Metabolome	C9H18O9
nHILIC_345.0942_3.3	Metabolome	C13H18N2O9
nHILIC_459.3476_1.8	Metabolome	C29H48O4
pRPLC_283.1541_8.3	Metabolome	C15H22O5_pos
pRPLC_491.371_11.3	Metabolome	C28H52O5
nRPLC_371.189_9.7	Metabolome	"5alpha-Androstan-3alpha,17alpha-diol monosulfate(2)"
nRPLC_301.2173_10.3	Metabolome	C20:5 FA
nRPLC_199.0976_5.6	Metabolome	"C10:1,DC FA"
nRPLC_153.0193_2.1	Metabolome	Gentisic acid
nRPLC_215.1288_6.8	Metabolome	"C11:0,DC FA"
nRPLC_329.2336_7.9	Metabolome	"C18:1,3OH FA"
nRPLC_225.186_10	Metabolome	C14:1 FA(2)
nRPLC_443.3164_11	Metabolome	C28H44O4
nRPLC_197.1547_9.1	Metabolome	C12:1 FA(1)
nRPLC_464.3015_8.8	Metabolome	Glycocholic acid
nRPLC_183.139_8.5	Metabolome	C11:1 FA
nHILIC_581.2411_5.9	Metabolome	Biliverdin(2)
nRPLC_297.2436_10	Metabolome	"C18:1,OH FA(2)"
nRPLC_450.2624_9.5	Metabolome	LysoPE(16:1)
nRPLC_241.1447_7.7	Metabolome	C13H22O4
pHILIC_104.1069_6.6	Metabolome	Choline
pHILIC_146.0811_7.5	Metabolome	Isobutyrylglycine
pHILIC_161.1283_8.1	Metabolome	C7H16N2O2
nHILIC_329.0306_10.8	Metabolome	Unknown_329.0306_10.8
nHILIC_247.057_11.8	Metabolome	Asp-Asp
nHILIC_131.0349_5.1	Metabolome	Ethylmalonate
nHILIC_103.0036_7.7	Metabolome	C5H8O6
nHILIC_130.0509_8.8	Metabolome	4-Hydroxyproline
nHILIC_261.0725_10.7	Metabolome	Asp-Glu or Glu-Asp
nHILIC_202.1197_13.3	Metabolome	Gly-Lys or Lys-Gly
nHILIC_116.0716_7.3	Metabolome	L-Valine
nRPLC_389.27_9.4	Metabolome	C24H38O4(1)
nRPLC_211.1704_9.4	Metabolome	"C13:1,OH FA"
nRPLC_487.3427_9.5	Metabolome	C30H48O5(2)
nRPLC_267.233_10.6	Metabolome	C17:1 FA
nRPLC_357.2801_11.2	Metabolome	C24:5 FA
nRPLC_297.2797_11.2	Metabolome	C19:0 FA(2)
nRPLC_455.2472_11	Metabolome	Sulfolithocholic acid
nRPLC_585.486_10.8	Metabolome	C36H66O4
nHILIC_197.0678_4.1	Metabolome	5-Acetylamino-6-amino-3-methyluracil(2)
nHILIC_168.0276_10.3	Metabolome	L-Glutamic acid
pRPLC_288.2172_5.1	Metabolome	C8:0 AC(2)
pRPLC_286.1439_8.4	Metabolome	Piperine(2)
nRPLC_527.2129_7.1	Metabolome	C25H36O12
pHILIC_130.0863_6.6	Metabolome	N-methylproline
pHILIC_299.1383_7.5	Metabolome	C17H18N2O3
pHILIC_280.1384_8	Metabolome	N-(1-Deoxy-1-fructosyl)valine
nHILIC_87.0087_4.4	Metabolome	Pyruvic acid
nHILIC_219.0451_7.2	Metabolome	C7H12N2O4S
nRPLC_329.2487_10.7	Metabolome	C22:5 FA
nRPLC_313.2385_10.3	Metabolome	"C18:0,DC FA(1)"
nRPLC_445.3324_11.2	Metabolome	C28H46O4(3)
nRPLC_227.1289_6.9	Metabolome	"C12:1,DC FA(2)"
nHILIC_245.0432_6.5	Metabolome	C7H14O7(2)
pRPLC_153.0658_1.7	Metabolome	N1-Methyl-2-pyridone-5-carboxamide(2)
pRPLC_370.2952_8.2	Metabolome	C14:1 AC
pRPLC_310.3104_11.1	Metabolome	Oleoyl Ethyl Amide
nRPLC_182.0458_1	Metabolome	Pyridoxic acid
nRPLC_465.249_8.3	Metabolome	Androsterone glucuronide(2)
pHILIC_790.5707_2	Metabolome	PC(P-38:6)
pHILIC_778.5358_5.1	Metabolome	PC(36:6)
pHILIC_288.2161_5.8	Metabolome	C8:0 AC(1)
pHILIC_174.1237_7.5	Metabolome	C7H15N3O2
pHILIC_178.0532_7.5	Metabolome	Alliin
pHILIC_186.1123_7.8	Metabolome	C9H15NO3
pHILIC_173.092_8.1	Metabolome	C7H12N2O3(1)
pHILIC_290.1594_11	Metabolome	"C6:0,DC AC(2)"
nHILIC_271.0614_5.2	Metabolome	C15H12O5
nHILIC_165.0403_11	Metabolome	Arabonate | Xylonate(2)
nHILIC_277.2171_1	Metabolome	C18:3 FA
nHILIC_833.5227_5.2	Metabolome	PI(34:2)
nHILIC_128.0352_7.6	Metabolome	5-oxoproline
nHILIC_177.0404_7.8	Metabolome	C6H10O6
nHILIC_209.0302_11	Metabolome	Glucaric acid
nHILIC_216.0704_10.5	Metabolome	C8H12N2O5
nHILIC_149.0455_8.2	Metabolome	C5H10O5(2)
nHILIC_183.0774_5	Metabolome	C8H12N2O3
nHILIC_163.04_1.4	Metabolome	Phenylpyruvic acid
nHILIC_197.0679_1.4	Metabolome	5-Acetylamino-6-amino-3-methyluracil(1)
nHILIC_157.0869_1	Metabolome	C8H14O3
pRPLC_181.0718_3.1	Metabolome	Paraxanthine
pRPLC_286.2015_4.3	Metabolome	C8:1 AC
pRPLC_310.2015_4.9	Metabolome	C10:3 AC(2)
pRPLC_347.0633_6	Metabolome	C13H16O12
pRPLC_676.417_10.7	Metabolome	PS(28:2)
nRPLC_365.2333_9.7	Metabolome	Tetrahydrocortisol
nRPLC_393.3013_10.7	Metabolome	C24H42O4
nRPLC_129.0558_1	Metabolome	3-Methyl-2-oxovaleric acid
nRPLC_159.1026_3.8	Metabolome	"C8:0,OH FA(3)"
nRPLC_183.1026_6.2	Metabolome	C10H16O3(1)
nRPLC_331.1762_7.2	Metabolome	C16H28O7
nRPLC_241.1809_8.8	Metabolome	"C14:1,OH FA(2)"
nRPLC_309.2073_9.4	Metabolome	"C18:2,DC FA"
nRPLC_313.2385_9.9	Metabolome	"C18:0,DC FA(3)"
nRPLC_389.2702_10.4	Metabolome	C24H38O4(2)
nRPLC_377.2696_10.5	Metabolome	MG(20:4)(1)
nRPLC_437.3271_10.7	Metabolome	C26H46O5
nRPLC_487.342_10.8	Metabolome	C30H48O5(1)
nRPLC_463.3428_11	Metabolome	C28H48O5
nRPLC_399.3268_11.1	Metabolome	25-hydroxyvitamin D3
nRPLC_439.3792_11.1	Metabolome	MG(24:1)
nRPLC_415.3217_10.9	Metabolome	Dihydroxyvitamin D3(2)
nRPLC_417.3009_10.8	Metabolome	C26H42O4
nRPLC_461.3269_10.7	Metabolome	C28H46O5
nRPLC_351.254_10.3	Metabolome	MG(18:3)
nRPLC_209.1183_6.5	Metabolome	C12H18O3(1)
nRPLC_201.1133_6.3	Metabolome	"C10:0,DC FA (Sebacic acid)(1)"
nRPLC_183.1026_5.5	Metabolome	C10H16O3(2)
nRPLC_206.0821_3.4	Metabolome	N-Acetyl-L-phenylalanine
nRPLC_117.0557_0.6	Metabolome	L-_-Hydroxyisovaleric acid
pHILIC_764.5217_4.2	Metabolome	PE(38:6)(1)
pHILIC_724.5254_4.4	Metabolome	PE(P-36:4)
pHILIC_740.522_4.4	Metabolome	PC(33:4)(1)
pHILIC_768.5548_4.4	Metabolome	PC(35:4)(1)
pHILIC_400.3413_5.6	Metabolome	C16:0 AC
pHILIC_189.1233_8.4	Metabolome	N6-Acetyl-L-lysine
pHILIC_143.0815_8.5	Metabolome	Ectoine
pHILIC_263.1235_11.4	Metabolome	C10H20N2O6
nHILIC_399.0965_7.8	Metabolome	Unknown_nHILIC_399.0965_7.8
nHILIC_120.0124_7.6	Metabolome	L-Cysteine
nHILIC_308.0987_7.7	Metabolome	C11H19NO9
nHILIC_738.511_4.5	Metabolome	PE(36:4)
pRPLC_166.0724_1.2	Metabolome	7-Methylguanine
pRPLC_424.3421_9.2	Metabolome	C18:2 AC
pRPLC_468.3085_9.3	Metabolome	LysoPC(14:0)
pRPLC_482.324_9.7	Metabolome	LysoPC(15:0)
pRPLC_478.2927_9.7	Metabolome	LysoPE(18:2)
pRPLC_496.3395_10	Metabolome	LysoPC(16:0)
nRPLC_243.1601_7.9	Metabolome	"C13:0,DC FA(2)"
nRPLC_243.1601_8.3	Metabolome	"C13:0,DC FA(1)"
nRPLC_528.309_10.2	Metabolome	LysoPE(22:4)
nRPLC_480.3097_10	Metabolome	Unknown_nRPLC_480.3097_10 (contains 16:0)
nRPLC_526.2939_9.9	Metabolome	LysoPE(22:5)
nRPLC_269.2122_9.6	Metabolome	"C16:1,OH FA(1)"
nRPLC_269.2122_9.3	Metabolome	"C16:1,OH FA(2)"
nRPLC_297.1344_7.3	Metabolome	C15H22O6(1)
nRPLC_155.0713_3.6	Metabolome	"C8:2,OH FA(1)"
pHILIC_302.3046_1.8	Metabolome	Sphinganine
pHILIC_776.5553_4.3	Metabolome	PE(P-40:6)(2)
pHILIC_750.5404_4.4	Metabolome	PE(P-38:5)(1)
pHILIC_834.5972_4.7	Metabolome	PC(40:6)(2)
pHILIC_764.557_4.7	Metabolome	PC(P-36:5)(2)
pHILIC_806.567_4.8	Metabolome	PC(38:6)(2)
pHILIC_810.597_4.8	Metabolome	PC(38:4)(1)
pHILIC_219.0795_5	Metabolome	Pro-Cys or Cys-Pro
pHILIC_850.6644_5	Metabolome	PC(P-42:5)
pHILIC_810.5973_5	Metabolome	PC(38:4)(2)
pHILIC_782.5665_5.1	Metabolome	PC(36:4)
pHILIC_742.5724_5.1	Metabolome	PC(P-34:2)
pHILIC_428.3736_5.5	Metabolome	C18:0 AC
pHILIC_813.6806_5.6	Metabolome	SM(d18:1/24:1)
pHILIC_785.6497_5.6	Metabolome	SM(d18:1/22:1)
pHILIC_731.6033_5.7	Metabolome	SM(d18:1/18:0)
pHILIC_703.5724_5.7	Metabolome	SM(d18:1/16:0)
pHILIC_132.0766_9	Metabolome	Creatine
nHILIC_151.0611_5.4	Metabolome	Arabitol | Xylitol
nHILIC_969.5442_9.2	Metabolome	PIP(38:2)
nHILIC_214.0488_7.2	Metabolome	sn-glycero-3-Phosphoethanolamine
pRPLC_180.0654_2	Metabolome	Hippuric acid
pRPLC_398.3266_8.9	Metabolome	C16:1 AC
pRPLC_426.3576_9.5	Metabolome	C18:1 AC
pRPLC_502.2927_9.7	Metabolome	LysoPE(20:4)
pRPLC_544.3392_9.8	Metabolome	LysoPC(20:4)
pRPLC_568.339_9.8	Metabolome	LysoPC(22:6)
pRPLC_546.3545_10.1	Metabolome	LysoPC(20:3)
pRPLC_438.2976_10.2	Metabolome	LysoPE(P-16:0)
pRPLC_480.3446_10.3	Metabolome	LysoPC(P-16:0)
pRPLC_510.3554_10.3	Metabolome	LysoPC(17:0)
pRPLC_548.3709_10.4	Metabolome	LysoPC(20:2)
pRPLC_506.3601_10.4	Metabolome	LysoPC(P-18:1)
pRPLC_508.376_10.5	Metabolome	LysoPC(P-18:0)
pRPLC_524.3708_10.6	Metabolome	LysoPC(18:0)
pRPLC_510.3913_10.9	Metabolome	LysoPC(O-18:0)
pRPLC_706.4648_11.2	Metabolome	PS(30:1)
pRPLC_647.5116_11.7	Metabolome	SM(d18:1/12:0)
nRPLC_235.1703_9.5	Metabolome	C15H24O2
nRPLC_155.0713_4.9	Metabolome	"C8:2,OH FA(2)"
nRPLC_371.1881_9.5	Metabolome	"5alpha-Androstan-3alpha,17alpha-diol monosulfate(1)"
nRPLC_284.2232_9.8	Metabolome	C16H31NO3
nRPLC_667.5325_10.5	Metabolome	Unknown_nRPLC_667.5325_10.5 (contains C16:0 FA)
nRPLC_619.2888_11.3	Metabolome	LysoPI(20:4)
nRPLC_435.3481_11.3	Metabolome	C27H48O4
nRPLC_359.2957_11.5	Metabolome	C24:4 FA
nRPLC_723.5955_11	Metabolome	Unknown_nRPLC_723.5955_11 (contains C18:0 FA)
nRPLC_312.2546_10.4	Metabolome	Palmitoylglycine
nRPLC_271.228_10.3	Metabolome	"C16:0,OH FA(1)"
pHILIC_247.1437_5.3	Metabolome	Tryptophan betaine
pHILIC_294.1541_7.3	Metabolome	C12H23NO7
pHILIC_160.0967_7.5	Metabolome	Betonicine
pHILIC_263.0868_10.8	Metabolome	C9H14N2O7
pHILIC_224.1653_12.6	Metabolome	Unknown_224.1653_12.6
pHILIC_210.1497_12.7	Metabolome	C12H19NO2
nHILIC_239.0771_7.6	Metabolome	C8H16O8
nHILIC_179.0561_7.6	Metabolome	Hexose
nHILIC_281.2484_1	Metabolome	C18:1 FA
nHILIC_103.04_4.6	Metabolome	Hydroxybutyric acid(1)
nHILIC_221.0665_7.7	Metabolome	C8H14O7
nHILIC_154.0621_9.6	Metabolome	L-Histidine
nHILIC_191.0197_11.2	Metabolome	Citric acid
nHILIC_274.1407_12.3	Metabolome	L-a-glutamyl-L-Lysine
nHILIC_88.988_11	Metabolome	Oxalate (ethanedioate)
nHILIC_207.0511_7.7	Metabolome	C7H12O7
nHILIC_252.09_6.7	Metabolome	Unknown_216.1132
pRPLC_232.1543_0.9	Metabolome	C4:0 AC
pRPLC_261.1446_1	Metabolome	gamma-glutamylleucine(1)
nRPLC_495.2962_9.1	Metabolome	Pregnanediol-3-glucuronide
nRPLC_172.9914_0.9	Metabolome	Phenol sulphate
nRPLC_172.098_2.8	Metabolome	N-Acetylleucine|N-Acetylisoleucine
nRPLC_541.2651_6.6	Metabolome	C27H42O11(4)
nRPLC_435.3115_10.4	Metabolome	C26H44O5
nRPLC_445.3323_11	Metabolome	C28H46O4(1)
nRPLC_311.2957_11.4	Metabolome	C20:0 FA
nRPLC_355.2852_11	Metabolome	MG(18:1)
nRPLC_487.3428_9.1	Metabolome	C30H48O5(3)
nRPLC_215.1652_8.1	Metabolome	"C12:0,OH FA(2)"
nRPLC_227.1288_7.1	Metabolome	"C12:1,DC FA(3)"
nRPLC_541.2652_6.8	Metabolome	C27H42O11(1)
nRPLC_200.1292_6	Metabolome	C10H19NO3
nRPLC_243.0331_5.4	Metabolome	eugenol sulfate
pHILIC_752.5554_4.3	Metabolome	PE(P-38:4)
pHILIC_792.5536_4.5	Metabolome	PC(37:6)
pHILIC_585.2694_4.9	Metabolome	Bilirubin
pHILIC_834.5975_5	Metabolome	PC(40:6)(1)
pHILIC_754.5367_5.1	Metabolome	PC(34:4)
pHILIC_786.5972_5.1	Metabolome	PC(36:2)
pHILIC_758.5668_5.1	Metabolome	PC(34:2)
pHILIC_746.5694_5.1	Metabolome	PC(33:1)
pHILIC_732.5525_5.1	Metabolome	PC(32:1)
pHILIC_203.0813_7.2	Metabolome	C11H12N2O3(3)
pHILIC_163.0534_7.5	Metabolome	C5H10N2O2S
nHILIC_224.0617_4.8	Metabolome	"Androstenediol (3beta,17beta) disulfate"
nHILIC_245.0431_7.2	Metabolome	C7H14O7(1)
nHILIC_133.0506_4.4	Metabolome	"2,3-Dihydroxyvaleric acid(1)"
nHILIC_742.5417_4.6	Metabolome	PE(36:2)
nHILIC_105.0192_7.8	Metabolome	Glyceric acid
nHILIC_360.1302_7.8	Metabolome	C15H23NO9
pRPLC_169.0971_1.6	Metabolome	Cyclo(ala-pro)
pRPLC_211.144_4.6	Metabolome	C11H18N2O2(2)
pRPLC_315.1341_7.4	Metabolome	C17H18N2O4(1)
pRPLC_494.324_9.5	Metabolome	LysoPC(16:1)
pRPLC_454.2927_9.9	Metabolome	LysoPE(16:0)
pRPLC_504.3082_10	Metabolome	LysoPE(20:3)
pRPLC_572.3708_10.3	Metabolome	LysoPC(22:4)
pRPLC_482.3238_10.5	Metabolome	LysoPE(18:0)
pRPLC_552.402_11.1	Metabolome	LysoPC(20:0)
nRPLC_478.2939_10.1	Metabolome	LysoPE(18:1)
nRPLC_508.3404_10.6	Metabolome	LysoPE(20:0)
nRPLC_609.5098_10.5	Metabolome	Unknown_nRPLC_667.5325_10.5 (contains C18:2 FA)
nRPLC_375.254_10.2	Metabolome	MG(20:5)
nRPLC_453.3223_9.8	Metabolome	C26H46O6(2)
nRPLC_369.1729_8.9	Metabolome	Androsterone sulfate(2)
nRPLC_165.092_7	Metabolome	C10:3 FA(1)
pHILIC_738.5403_4.4	Metabolome	PC(P-34:4)
pHILIC_764.5577_5	Metabolome	PC(P-36:5)(1)
pHILIC_806.5663_5	Metabolome	PC(38:6)(1)
pHILIC_768.5508_5.1	Metabolome	PC(35:4)
pHILIC_772.5828_5.1	Metabolome	PC(35:2)
pHILIC_583.2539_5.3	Metabolome	Biliverdin(1)
pHILIC_212.1026_7.4	Metabolome	N-acetyl-1-methylhistidine
pHILIC_175.1076_8.9	Metabolome	C7H14N2O3(2)
nHILIC_188.0716_2.1	Metabolome	3-Indolepropionic acid
nHILIC_441.1596_3.7	Metabolome	C17H30O13
nHILIC_746.5159_4.2	Metabolome	PE(P-38:6)
nHILIC_343.0993_3.5	Metabolome	Unknown_261.0960
nHILIC_121.0505_3.5	Metabolome	Erythritol|D-Threitol
nHILIC_130.0872_6.3	Metabolome	L-Isoleucine|L-Leucine
nHILIC_173.0567_7.6	Metabolome	C6H10N2O4
nHILIC_191.0561_8.5	Metabolome	Quinic acid
nHILIC_302.1148_6.5	Metabolome	Indoleacetyl glutamine
nHILIC_163.0612_4.5	Metabolome	C6H12O5
nHILIC_777.5678_4.3	Metabolome	PG(36:0)
pRPLC_312.1305_2.8	Metabolome	"N2,N2-Dimethylguanosine"
pRPLC_204.0655_4.8	Metabolome	Indolepyruvate
pRPLC_319.129_5.7	Metabolome	C16H18N2O5(2)
pRPLC_319.129_5.8	Metabolome	C16H18N2O5(1)
pRPLC_301.1185_5.8	Metabolome	C16H20N2O6
pRPLC_417.3362_9.5	Metabolome	C27H44O3(2)
pRPLC_526.2924_9.8	Metabolome	LysoPE(22:6)
pRPLC_508.3397_9.9	Metabolome	LysoPE(20:1)
pRPLC_269.2264_10.4	Metabolome	Retinol (Vitamin A)
pRPLC_429.2519_10.5	Metabolome	C23H32N4O4
pRPLC_550.3864_10.7	Metabolome	LysoPC(20:1)
pRPLC_538.3863_10.8	Metabolome	LysoPE(22:0)
pRPLC_704.4472_10.9	Metabolome	PS(30:2)
pRPLC_359.3154_11	Metabolome	MG(18:0)
pRPLC_730.4663_11.3	Metabolome	PS(32:3)
pRPLC_675.5429_12.6	Metabolome	SM(d18:1/14:0)
nRPLC_471.3474_11.3	Metabolome	C30H48O4
nRPLC_149.0607_4.6	Metabolome	3-Phenylpropionate (hydrocinnamate)
nRPLC_227.1289_7.7	Metabolome	"C12:1,DC FA(4)"
nRPLC_367.1585_8.9	Metabolome	Dehydroisoandrosterone sulfate (DHEA-S)(1)
nRPLC_413.2004_8.9	Metabolome	C21H34O6S
nRPLC_299.2228_9.3	Metabolome	MG(14:1)(2)
nRPLC_369.1741_9.5	Metabolome	Androsterone sulfate(1)
nRPLC_395.1897_10	Metabolome	Pregnenolone sulfate
nRPLC_433.3322_10.4	Metabolome	C27H46O4(5)
nRPLC_299.2591_10.6	Metabolome	"C18:0,OH FA(2)"
nRPLC_441.3947_11.3	Metabolome	MG(24:0)(1)
nRPLC_447.3483_11.4	Metabolome	C28H48O4
nRPLC_433.3322_11.4	Metabolome	C27H46O4(2)
nRPLC_397.3686_11.5	Metabolome	"C25:0,OH FA"
nRPLC_449.364_11.6	Metabolome	C28H50O4
nRPLC_335.2957_11.7	Metabolome	C22:2 FA
nRPLC_597.3048_11.9	Metabolome	LysoPI(18:1)
nRPLC_561.4141_11.5	Metabolome	C34H58O6
nRPLC_441.395_11.2	Metabolome	MG(24:0)(2)
nRPLC_489.3582_10.6	Metabolome	C30H50O5(2)
nRPLC_511.3039_10.3	Metabolome	LysoPG(18:0)
nRPLC_429.3008_10.3	Metabolome	7-alpha-hydroxy-3-oxo-4-cholestenoate (7-Hoca)
nRPLC_431.3166_10.2	Metabolome	C27H44O4(1)
nRPLC_257.2122_9.9	Metabolome	"C15:0,OH FA"
nRPLC_283.1088_9.6	Metabolome	gamma-glutamylhistidine
nRPLC_432.1927_8.8	Metabolome	C25H27N3O4
nRPLC_367.1582_8.7	Metabolome	Dehydroisoandrosterone sulfate (DHEA-S)(2)
pHILIC_147.1128_11.2	Metabolome	C6H14N2O2
nHILIC_146.0458_7.6	Metabolome	N-Acetylserine
nHILIC_114.0559_7.8	Metabolome	L-Proline
nHILIC_149.0455_7.6	Metabolome	C5H10O5(1)
pRPLC_330.2637_7.1	Metabolome	C11:0 AC
nRPLC_253.2172_10.3	Metabolome	C16:1 FA
nRPLC_377.2698_9.2	Metabolome	MG(20:4)(2)
nRPLC_295.2279_9.6	Metabolome	9-HODE
nRPLC_343.2853_9.8	Metabolome	"C20:0,2OH FA"
nRPLC_321.2435_9.9	Metabolome	"C20:3,OH FA(2)"
nRPLC_295.2642_11.1	Metabolome	C19:1 FA
nRPLC_331.2644_10.9	Metabolome	C22:4 FA
nRPLC_539.2494_7	Metabolome	Tetrahydroaldosterone-3-glucuronide(1)
pHILIC_768.5558_3.5	Metabolome	PC(35:4)(2)
pHILIC_728.5563_4.5	Metabolome	PE(P-36:2)
pHILIC_310.1756_5.8	Metabolome	C15H23N3O4
pHILIC_189.1345_14.4	Metabolome	Homoarginine
nHILIC_241.087_1.1	Metabolome	C15H14O3
nHILIC_401.0758_7.6	Metabolome	C13H22O12S
nHILIC_724.5298_4.4	Metabolome	PE(P-36:3)
nHILIC_147.0297_10.2	Metabolome	C5H8O5
nHILIC_269.0542_5.9	Metabolome	C8H14N2O6
nHILIC_700.5312_4.5	Metabolome	PE(P-34:1)
nHILIC_381.1387_3.9	Metabolome	C16H22N4O7
nHILIC_174.056_3.8	Metabolome	Indoleacetic acid
pRPLC_195.1128_3.1	Metabolome	C10H14N2O2
pRPLC_197.1285_3.4	Metabolome	C10H16N2O2
pRPLC_267.1228_6.3	Metabolome	C14H18O5(2)
pRPLC_352.2248_8.5	Metabolome	C16 Sphingosine 1-phosphate
pRPLC_463.2326_9	Metabolome	C25H34O8
pRPLC_380.2561_9.4	Metabolome	C18 Sphingosine 1-phosphate
pRPLC_382.2719_9.6	Metabolome	Sphinganine 1-phosphate
pRPLC_520.3396_9.8	Metabolome	LysoPC(18:2)
nRPLC_381.1387_4.6	Metabolome	C15H26O11
nRPLC_167.1077_7.2	Metabolome	C10:2 FA
nRPLC_187.007_2.3	Metabolome	p-Cresol sulfate
nRPLC_501.1739_7.1	Metabolome	C30H30O5S
nRPLC_321.2435_10.1	Metabolome	"C20:3,OH FA(1)"
nRPLC_319.2278_10	Metabolome	"C20:4,OH FA(1)"
nRPLC_371.1887_9.1	Metabolome	"5alpha-Androstan-3alpha,17alpha-diol monosulfate(3)"
nRPLC_507.2231_9	Metabolome	C26H36O10
nRPLC_165.092_7.2	Metabolome	C10:3 FA(2)
nRPLC_239.0924_7.1	Metabolome	3-carboxy-4-methyl-5-propyl-2-furanpropanoate (CMPF)
nHILIC_333.0592_10.7	Metabolome	C9H19O11P
pRPLC_319.1289_6	Metabolome	C16H18N2O5(3)
nRPLC_391.2856_9.2	Metabolome	Chenodeoxycholic Acid(3)
nRPLC_201.1133_5.9	Metabolome	"C10:0,DC FA (Sebacic acid)(2)"
nRPLC_243.1601_8	Metabolome	"C13:0,DC FA(4)"
nRPLC_297.2799_11.7	Metabolome	C19:0 FA(1)
nRPLC_309.2801_11.4	Metabolome	C20:1 FA
nRPLC_433.3322_11.2	Metabolome	C27H46O4(1)
nRPLC_305.2486_10.7	Metabolome	C20:3 FA
nRPLC_293.2122_9.4	Metabolome	"C18:3,OH FA(3)"
nHILIC_253.0927_3.2	Metabolome	C9H18O8
nHILIC_151.0261_4.3	Metabolome	Xanthine
nHILIC_504.3095_5.8	Metabolome	LysoPE(20:2)
pRPLC_355.1265_6.4	Metabolome	C17H20N2O5
pRPLC_315.1341_7.8	Metabolome	C17H18N2O4(2)
pRPLC_369.2397_10.5	Metabolome	C20H28N6O
pRPLC_417.3348_10.5	Metabolome	C27H44O3(1)
nRPLC_204.0666_4.3	Metabolome	Cinnamoylglycine
nRPLC_433.3321_10.9	Metabolome	C27H46O4(4)
nRPLC_313.2386_9.1	Metabolome	"C18:0,DC FA(2)"
pHILIC_740.5213_3.6	Metabolome	PC(33:4)(2)
pHILIC_738.5049_3.9	Metabolome	PE(36:5)
pHILIC_716.5208_3.9	Metabolome	PE(34:2)
pHILIC_179.0484_7.4	Metabolome	Cys-Gly or Gly-Cys
pHILIC_263.0732_7.6	Metabolome	Unknown_pHILIC_263.0732_7.6
pHILIC_139.0501_7.6	Metabolome	Urocanic acid
pHILIC_173.092_7.6	Metabolome	C7H12N2O3(2)
pHILIC_203.1388_8.9	Metabolome	Ala-Leu or Leu-Ala
nHILIC_740.525_4.5	Metabolome	PE(36:3)
nHILIC_512.2684_5.7	Metabolome	Chenodeoxycholic acid 3-sulfate
nHILIC_243.0621_5.8	Metabolome	Pseudouridine
nHILIC_190.0356_10.6	Metabolome	C6H9NO6
nHILIC_133.0142_10.4	Metabolome	L-Malic acid
nHILIC_104.0352_9.7	Metabolome	L-Serine
nHILIC_528.2633_6.7	Metabolome	C26H43NO8S
pRPLC_295.1292_1.3	Metabolome	gamma-glutamylphenylalanine
pRPLC_313.1548_3.5	Metabolome	Phenylalanylphenylalanine
pRPLC_211.1441_4.4	Metabolome	C11H18N2O2(1)
pRPLC_357.2786_9.8	Metabolome	C24H38O3(1)
pRPLC_445.3672_12.4	Metabolome	C29H48O3
nRPLC_391.2856_9.8	Metabolome	Chenodeoxycholic Acid(1)
nRPLC_229.0868_7.2	Metabolome	C14H14O3
nRPLC_257.1759_8.8	Metabolome	"C14:0,DC FA(2)"
nRPLC_165.0556_2.3	Metabolome	Phenyllactate (PLA)
nRPLC_465.2489_8.6	Metabolome	Androsterone glucuronide(1)
nRPLC_512.2683_10.8	Metabolome	Sulfolithocholylglycine
nRPLC_415.3217_11.4	Metabolome	Dihydroxyvitamin D3(1)
nRPLC_431.3164_10.9	Metabolome	C27H44O4(3)
nRPLC_385.332_10.8	Metabolome	MG(20:0)
nRPLC_433.3323_10.5	Metabolome	C27H46O4(3)
nRPLC_239.2016_10.1	Metabolome	C15:1 FA
nRPLC_275.2017_10	Metabolome	C18:4 FA
nRPLC_249.1859_9.8	Metabolome	C16:3 FA
nRPLC_188.0352_3.1	Metabolome	Kynurenic acid
pHILIC_764.5206_3.4	Metabolome	PE(38:6)(2)
pHILIC_118.0861_7	Metabolome	Betaine
pHILIC_245.1492_7.5	Metabolome	C11H20N2O4
pHILIC_249.1078_10.4	Metabolome	gamma-glutamylthreonine(1)
pHILIC_229.1181_10.5	Metabolome	pro-hydroxy-pro(2)
pHILIC_133.097_16.1	Metabolome	Ornithine
nHILIC_160.0615_10.7	Metabolome	Aminoadipic acid
nHILIC_144.0302_7.2	Metabolome	C5H7NO4
nHILIC_96.96_11.1	Metabolome	Sulfuric acid
nHILIC_160.0251_10.4	Metabolome	C5H7NO5
pRPLC_311.0802_7.2	Metabolome	C11H18O8S
pRPLC_373.2738_9.2	Metabolome	C24H36O3
nRPLC_567.3173_8.9	Metabolome	C30H48O10(3)
nRPLC_567.3171_9.6	Metabolome	C30H48O10(2)
nRPLC_241.2174_10.5	Metabolome	C15:0 FA
nRPLC_269.2487_11	Metabolome	C17:0 FA(1)
nRPLC_567.3177_9.2	Metabolome	C30H48O10(1)
nRPLC_541.2652_7.4	Metabolome	C27H42O11(2)
pHILIC_142.1225_1.3	Metabolome	C8H15NO
pHILIC_154.1225_1.6	Metabolome	C9H15NO
pHILIC_223.1438_4.1	Metabolome	C12H18N2O2
pHILIC_152.0705_7.6	Metabolome	C8H9NO2
nHILIC_174.0883_10.1	Metabolome	Citrulline
nHILIC_124.0073_8.7	Metabolome	Taurine
nHILIC_203.1037_10.8	Metabolome	C8H16N2O4
nHILIC_165.0768_3.4	Metabolome	C6H14O5
nHILIC_195.051_8.7	Metabolome	Gluconic acid
nHILIC_88.0403_8.9	Metabolome	L-Alanine
nHILIC_447.2749_7.2	Metabolome	C26H40O6
nHILIC_149.0455_5.6	Metabolome	C5H10O5(3)
pRPLC_290.1601_0.6	Metabolome	"C5:0,DC AC"
pRPLC_339.0751_7.2	Metabolome	C12H18O9S
pRPLC_286.1439_8.5	Metabolome	Piperine(1)
nRPLC_381.0762_6	Metabolome	Unknown_nRPLC_381.0762_6
nRPLC_311.223_9.8	Metabolome	"C18:1,DC FA"
nRPLC_225.186_9.8	Metabolome	C14:1 FA(1)
nRPLC_251.2016_10	Metabolome	C16:2 FA
nRPLC_445.2544_10.8	Metabolome	C18H32N6O2
nRPLC_343.2657_10.9	Metabolome	C23H36O2
nRPLC_307.2644_11	Metabolome	C20:2 FA
nRPLC_355.2643_10.9	Metabolome	C24:6 FA
nRPLC_299.2227_9.9	Metabolome	MG(14:1)(3)
nRPLC_565.3015_9	Metabolome	C30H46O10
pHILIC_189.0869_10.4	Metabolome	C7H12N2O4
nHILIC_217.0651_5	Metabolome	Cys-Pro or Pro-Cys
nHILIC_194.0458_6.6	Metabolome	Hydroxyhippurate(1)
nHILIC_218.1032_6.5	Metabolome	Pantothenic acid
pRPLC_261.1446_0.8	Metabolome	gamma-glutamylleucine(2)
pRPLC_312.1594_9	Metabolome	C19H21NO3
nRPLC_185.1183_6.8	Metabolome	"C10:1,OH FA"
nRPLC_315.2541_9.2	Metabolome	MG(15:0)(2)
nRPLC_299.2228_9.6	Metabolome	MG(14:1)(1)
pHILIC_229.1543_7.2	Metabolome	C11H20N2O3(1)
nHILIC_204.0665_5.1	Metabolome	Indolelactic acid
nHILIC_181.0506_6.2	Metabolome	Hydroxyphenyllactic acid
nHILIC_716.5258_4.7	Metabolome	PE(34:1)
pRPLC_310.2014_5.1	Metabolome	C10:3 AC(1)
pRPLC_445.2947_10.3	Metabolome	C27H40O5
pHILIC_542.3221_6	Metabolome	LysoPC(20:5)
pHILIC_282.119_6.7	Metabolome	N1-methyladenosine
nHILIC_235.0723_6.5	Metabolome	L-Formylkynurenine
nHILIC_425.0806_12.4	Metabolome	Cysteineglutathione disulfide
nHILIC_189.0404_7.2	Metabolome	C7H10O6
nHILIC_103.0399_5.4	Metabolome	Hydroxybutyric acid(2)
nRPLC_285.2072_9.6	Metabolome	"C16:0,DC FA(1)"
pHILIC_199.0825_1.5	Metabolome	C7H10N4O3
pHILIC_776.5554_3	Metabolome	PE(P-40:6)(1)
pHILIC_722.5093_4.2	Metabolome	PE(P-36:5)
pHILIC_372.31_5.6	Metabolome	C14:0 AC
pHILIC_224.1278_6.2	Metabolome	C12H17NO3
pHILIC_216.1227_7	Metabolome	C3:1 AC
pHILIC_237.0865_7.3	Metabolome	C11H12N2O4
pHILIC_180.0865_7.4	Metabolome	Hexosamine
pHILIC_234.0766_7.5	Metabolome	C7H18NO4S
pHILIC_290.1593_10.7	Metabolome	"C6:0,DC AC(1)"
pHILIC_258.1097_10.8	Metabolome	Glycerophosphocholine
pHILIC_229.1181_10.9	Metabolome	pro-hydroxy-pro(1)
nHILIC_119.0349_5.7	Metabolome	C4H8O4
nHILIC_188.0023_1.6	Metabolome	2-Aminophenol sulfate
nHILIC_115.0399_2	Metabolome	Alpha-ketoisovaleric acid
nHILIC_118.0509_8.9	Metabolome	L-Threonine
nHILIC_144.0666_5.1	Metabolome	C6H11NO3
nHILIC_181.0717_3.5	Metabolome	C6H14O6
pRPLC_153.0658_1.2	Metabolome	N1-Methyl-2-pyridone-5-carboxamide(1)
pRPLC_265.1184_2.6	Metabolome	Alpha-N-Phenylacetyl-L-glutamine
pRPLC_279.1705_3.1	Metabolome	Phenylalanylleucine
pRPLC_146.06_3.6	Metabolome	4-formyl Indole(1)
pRPLC_239.0914_5.1	Metabolome	C12H14O5
pRPLC_277.0384_5.1	Metabolome	Dihydroferulic acid
pRPLC_312.2171_5.4	Metabolome	C10:2 AC
pRPLC_314.2328_6.1	Metabolome	C10:1 AC
pRPLC_255.1227_7.2	Metabolome	C13H18O5
pRPLC_269.1382_7.1	Metabolome	C14H20O5(1)_pos
pRPLC_777.6945_7.2	Metabolome	Thyroxine
pRPLC_267.1228_7.6	Metabolome	C14H18O5(3)
pRPLC_368.2795_7.7	Metabolome	C14:2 AC
pRPLC_344.2796_7.8	Metabolome	C12:0 AC
nRPLC_263.1038_2.7	Metabolome	C13H16N2O4
nRPLC_263.1289_6.8	Metabolome	gamma-CEHC
nRPLC_448.3067_8.6	Metabolome	Chenodeoxycholic acid glycine conjugate(2)
nRPLC_407.2804_9.2	Metabolome	Cholic Acid
nRPLC_283.0822_2.4	Metabolome	p-Cresol glucuronide
nRPLC_204.0665_3	Metabolome	C11H11NO3
nRPLC_297.1344_7.6	Metabolome	C15H22O6(2)
nRPLC_195.139_8.6	Metabolome	"C12:2,OH FA"
nRPLC_271.2279_9.6	Metabolome	"C16:0,OH FA(2)"
nRPLC_299.2591_10.2	Metabolome	"C18:0,OH FA(1)"
nRPLC_413.222_10.8	Metabolome	C18H38O8S
nRPLC_227.2017_10.2	Metabolome	C14:0 FA
nRPLC_315.2539_9.7	Metabolome	MG(15:0)(3)
nRPLC_467.2636_8.4	Metabolome	"5alpha-Androstan-3alpha,17beta-diol 17-glucuronide(1)"
nRPLC_199.1703_7.7	Metabolome	C12:0 FA(2)
nRPLC_481.244_7.1	Metabolome	C25H38O9
CFD	Proteome	CFD
LV144	Proteome	LV144
APOC1	Proteome	APOC1
KV315	Proteome	KV315
SERPINA5	Proteome	SERPINA5
APOA4	Proteome	APOA4
MYH7	Proteome	MYH7
INHBC	Proteome	INHBC
DYNC1H1	Proteome	DYNC1H1
PSTK	Proteome	PSTK
FAM3C	Proteome	FAM3C
SH3GL3	Proteome	SH3GL3
MAN2B2	Proteome	MAN2B2
F9	Proteome	F9
IGHG4	Proteome	IGHG4
FGB	Proteome	FGB
VTN	Proteome	VTN
CLEC3B	Proteome	CLEC3B
SERPINA7	Proteome	SERPINA7
PROS1	Proteome	PROS1
CLU.1	Proteome	CLU.1
COL6A3	Proteome	COL6A3
ITIH2	Proteome	ITIH2
PROZ	Proteome	PROZ
HGFAC	Proteome	HGFAC
MMRN1	Proteome	MMRN1
PRG4	Proteome	PRG4
C1RL	Proteome	C1RL
CP	Proteome	CP
HV333_2	Proteome	HV333_2
A1BG	Proteome	A1BG
VCL	Proteome	VCL
C4BPB	Proteome	C4BPB
SEPP1	Proteome	SEPP1
AFG3L2	Proteome	AFG3L2
SERPINA1	Proteome	SERPINA1
APOA1	Proteome	APOA1
APOA2	Proteome	APOA2
IGHM.1	Proteome	IGHM.1
LV657_2	Proteome	LV657_2
PCOLCE	Proteome	PCOLCE
RYR2	Proteome	RYR2
CFHR5	Proteome	CFHR5
CD5L	Proteome	CD5L
BCHE	Proteome	BCHE
PFN1	Proteome	PFN1
CFP	Proteome	CFP
COMP	Proteome	COMP
CEP290	Proteome	CEP290
CA1	Proteome	CA1
CST3	Proteome	CST3
KVD33_4	Proteome	KVD33_4
KV320_2	Proteome	KV320_2
IGHG2	Proteome	IGHG2
C1QB	Proteome	C1QB
C1QC	Proteome	C1QC
FN1	Proteome	FN1
PPBP	Proteome	PPBP
HPX	Proteome	HPX
PROC	Proteome	PROC
VWF	Proteome	VWF
KV311	Proteome	KV311
KV310	Proteome	KV310
APOD	Proteome	APOD
F7	Proteome	F7
HV102	Proteome	HV102
AZGP1	Proteome	AZGP1
ECM1	Proteome	ECM1
VASN	Proteome	VASN
TTN	Proteome	TTN
PCYOX1	Proteome	PCYOX1
SERPINA10	Proteome	SERPINA10
FAM161B	Proteome	FAM161B
C3	Proteome	C3
KVD28	Proteome	KVD28
LV321	Proteome	LV321
IGHD	Proteome	IGHD
FGA	Proteome	FGA
LRG1	Proteome	LRG1
AHSG	Proteome	AHSG
HV270	Proteome	HV270
C4A	Proteome	C4A
SELL	Proteome	SELL
MCAM	Proteome	MCAM
HBA1	Proteome	HBA1
ITIH3	Proteome	ITIH3
COLEC11	Proteome	COLEC11
IL1RAP.1	Proteome	IL1RAP.1
LYVE1	Proteome	LYVE1
FCGBP	Proteome	FCGBP
ATRN	Proteome	ATRN
KVD33_2	Proteome	KVD33_2
LV211	Proteome	LV211
PIGR	Proteome	PIGR
C9	Proteome	C9
SERPIND1	Proteome	SERPIND1
HV434	Proteome	HV434
GP1BA	Proteome	GP1BA
MGP	Proteome	MGP
SERPINF2	Proteome	SERPINF2
CLU	Proteome	CLU
MTHFD1	Proteome	MTHFD1
LCP1	Proteome	LCP1
DSP	Proteome	DSP
GPX3	Proteome	GPX3
CFHR2	Proteome	CFHR2
BTD	Proteome	BTD
ACTBL2	Proteome	ACTBL2
HPR	Proteome	HPR
CFB	Proteome	CFB
IGF2	Proteome	IGF2
IGHM	Proteome	IGHM
GAPDH	Proteome	GAPDH
GSN	Proteome	GSN
PLTP	Proteome	PLTP
C5	Proteome	C5
KNG1_2	Proteome	KNG1_2
HV146	Proteome	HV146
ORM2	Proteome	ORM2
FCN3	Proteome	FCN3
TPM4	Proteome	TPM4
C7	Proteome	C7
LV321.1	Proteome	LV321.1
CNDP1	Proteome	CNDP1
KV320.1	Proteome	KV320.1
ACTA1	Proteome	ACTA1
HBB	Proteome	HBB
CFHR1	Proteome	CFHR1
KNG1	Proteome	KNG1
KVD33	Proteome	KVD33
KVD16	Proteome	KVD16
KVD33_3	Proteome	KVD33_3
HV169	Proteome	HV169
HV323	Proteome	HV323
IGKC	Proteome	IGKC
APOE	Proteome	APOE
TF	Proteome	TF
F11	Proteome	F11
CFI	Proteome	CFI
F13B	Proteome	F13B
LDHB	Proteome	LDHB
LPA	Proteome	LPA
PTPRC	Proteome	PTPRC
SAA2	Proteome	SAA2
TYMP	Proteome	TYMP
CPN2	Proteome	CPN2
FBLN1.1	Proteome	FBLN1.1
MSN	Proteome	MSN
MYH9	Proteome	MYH9
TAGLN2	Proteome	TAGLN2
AFM	Proteome	AFM
B2M	Proteome	B2M
GPLD1	Proteome	GPLD1
KRT17	Proteome	KRT17
PON3	Proteome	PON3
FCN2	Proteome	FCN2
CPB2	Proteome	CPB2
SCLT1	Proteome	SCLT1
APOM	Proteome	APOM
PLG	Proteome	PLG
KLKB1	Proteome	KLKB1
MASP2	Proteome	MASP2
KV133	Proteome	KV133
CPN1	Proteome	CPN1
NUP205	Proteome	NUP205
PGLYRP2	Proteome	PGLYRP2
ATRN.1	Proteome	ATRN.1
C1R	Proteome	C1R
SERPINC1	Proteome	SERPINC1
A2M	Proteome	A2M
LV140	Proteome	LV140
LV319	Proteome	LV319
HV439	Proteome	HV439
HBD	Proteome	HBD
TFRC	Proteome	TFRC
C8G	Proteome	C8G
C1S	Proteome	C1S
MBL2	Proteome	MBL2
MST1	Proteome	MST1
PON1	Proteome	PON1
ACAA2	Proteome	ACAA2
CAPZB	Proteome	CAPZB
F2	Proteome	F2
F12	Proteome	F12
C8A	Proteome	C8A
CFH	Proteome	CFH
FBLN1	Proteome	FBLN1
INPP5E	Proteome	INPP5E
APOL1	Proteome	APOL1
IGJ	Proteome	IGJ
KV320	Proteome	KV320
LV325	Proteome	LV325
APCS	Proteome	APCS
KV116	Proteome	KV116
KV230	Proteome	KV230
KV320.2	Proteome	KV320.2
C2	Proteome	C2
IGF2R	Proteome	IGF2R
FLNA	Proteome	FLNA
SCP2	Proteome	SCP2
PRDX2	Proteome	PRDX2
SAA4	Proteome	SAA4
ITIH4	Proteome	ITIH4
FRMPD1	Proteome	FRMPD1
CTTNBP2	Proteome	CTTNBP2
IGHA2	Proteome	IGHA2
PF4	Proteome	PF4
LV743	Proteome	LV743
F5	Proteome	F5
NCAM1	Proteome	NCAM1
PI16	Proteome	PI16
ASS1	Proteome	ASS1
KV139	Proteome	KV139
IGHG3	Proteome	IGHG3
APOH	Proteome	APOH
RBP4	Proteome	RBP4
ENO1	Proteome	ENO1
IGFBP3	Proteome	IGFBP3
MAP4	Proteome	MAP4
SLFN11	Proteome	SLFN11
HV330_2	Proteome	HV330_2
IGHA1	Proteome	IGHA1
TTR	Proteome	TTR
CETP	Proteome	CETP
MASP1	Proteome	MASP1
HNRNPM	Proteome	HNRNPM
EFEMP1	Proteome	EFEMP1
NPHP3	Proteome	NPHP3
CFHR4	Proteome	CFHR4
ORM1	Proteome	ORM1
C4BPA	Proteome	C4BPA
SERPINA6	Proteome	SERPINA6
SAA1	Proteome	SAA1
SERPINA4	Proteome	SERPINA4
F10	Proteome	F10
HV348	Proteome	HV348
HV313	Proteome	HV313
HV330	Proteome	HV330
HV307_2	Proteome	HV307_2
ALB	Proteome	ALB
GC	Proteome	GC
CD14	Proteome	CD14
C6	Proteome	C6
IGFALS	Proteome	IGFALS
LUM	Proteome	LUM
LGALS3BP	Proteome	LGALS3BP
MYBPC2	Proteome	MYBPC2
FERMT3	Proteome	FERMT3
FETUB	Proteome	FETUB
TLN1	Proteome	TLN1
APOC2	Proteome	APOC2
C1QA	Proteome	C1QA
LYZ	Proteome	LYZ
HV333	Proteome	HV333
C8B	Proteome	C8B
DBH	Proteome	DBH
IGLC2	Proteome	IGLC2
PRG4.1	Proteome	PRG4.1
ZNF10	Proteome	ZNF10
HP	Proteome	HP
LV147	Proteome	LV147
HV353	Proteome	HV353
LCAT	Proteome	LCAT
HRG	Proteome	HRG
LV151	Proteome	LV151
PZP	Proteome	PZP
APOC4	Proteome	APOC4
ADIPOQ	Proteome	ADIPOQ
ABCF1	Proteome	ABCF1
SERPING1	Proteome	SERPING1
LBP	Proteome	LBP
CAMP	Proteome	CAMP
ATP11B	Proteome	ATP11B
AGT	Proteome	AGT
C4B	Proteome	C4B
ITIH1	Proteome	ITIH1
SERPINF1	Proteome	SERPINF1
CRISP3	Proteome	CRISP3
TGFBI	Proteome	TGFBI
GPR116	Proteome	GPR116
CDK5RAP2	Proteome	CDK5RAP2
IL1RAP	Proteome	IL1RAP
IGLL5	Proteome	IGLL5
F13A1	Proteome	F13A1
SERPINA3	Proteome	SERPINA3
HV307	Proteome	HV307
APOC3	Proteome	APOC3
FGG	Proteome	FGG
APOB	Proteome	APOB
LV657	Proteome	LV657
ILK	Proteome	ILK
APOF	Proteome	APOF
HABP2	Proteome	HABP2
ARHGAP19	Proteome	ARHGAP19
OLFM1	Proteome	OLFM1
CDHR5	Proteome	CDHR5

## Sheet: Edge information
Supplemental Data S4. The detailed information of the inter-correlation network of the exposome and internal-multi-omics data.
from	to	Correlation	p_value	FDR(-log10)	from_Class	from_true_name	to_Class	to_true_name
NM1254	Glucose._Ser.Plas	-0.974679	0.00481823	2.31711	Exposome (chemical)	Salicylic acid	Blood test	Glucose._Ser.Plas
NM1254	Calcium._Ser.Plas	0.974679	0.00481823	2.31711	Exposome (chemical)	Salicylic acid	Blood test	Calcium._Ser.Plas
NM1446	HDL_Cholesterol	1	0.0166667	1.77815	Exposome (chemical)	Trimethyl Phosphate	Blood test	HDL_Cholesterol
NM2680	Glucose._Ser.Plas	1	0.0166667	1.77815	Exposome (chemical)	Tetrachloroethylene	Blood test	Glucose._Ser.Plas
NM3057	HDL_Cholesterol	-1	0.0166667	1.77815	Exposome (chemical)	Acephate	Blood test	HDL_Cholesterol
NM3853	HDL_Cholesterol	-1	0.0166667	1.77815	Exposome (chemical)	Dinoseb	Blood test	HDL_Cholesterol
NM4337	HDL_Cholesterol	-1	0.0166667	1.77815	Exposome (chemical)	Zeranol	Blood test	HDL_Cholesterol
PM1171	MCH	1	0.0166667	1.77815	Exposome (chemical)	Triethyl phosphate	Blood test	MCH
PM1307	Glucose._Ser.Plas	-1	0.0166667	1.77815	Exposome (chemical)	Dibromoethane	Blood test	Glucose._Ser.Plas
PM1935	HDL_Cholesterol	-1	0.0166667	1.77815	Exposome (chemical)	Pymetrozin	Blood test	HDL_Cholesterol
PM2296	BASO._.	-1	0.0166667	1.77815	Exposome (chemical)	Cyproconazole	Blood test	BASO._.
PM2541	Hematocrit	-1	0.0166667	1.77815	Exposome (chemical)	Amoxicillin	Blood test	Hematocrit
PM2541	Platelet_count	1	0.0166667	1.77815	Exposome (chemical)	Amoxicillin	Blood test	Platelet_count
PM2541	RDW	-1	0.0166667	1.77815	Exposome (chemical)	Amoxicillin	Blood test	RDW
PM2541	Alk_P.TASE._Total._Ser.Plas	-1	0.0166667	1.77815	Exposome (chemical)	Amoxicillin	Blood test	Alk_P.TASE._Total._Ser.Plas
PM2541	Albumin._Ser.Plas	-1	0.0166667	1.77815	Exposome (chemical)	Amoxicillin	Blood test	Albumin._Ser.Plas
PM3067	Total_Bilirubin	-0.974679	0.00481823	2.31711	Exposome (chemical)	Tetrabromobisphenol A diallyl ether	Blood test	Total_Bilirubin
PM3067	Hemoglobin_A1c	-0.974679	0.00481823	2.31711	Exposome (chemical)	Tetrabromobisphenol A diallyl ether	Blood test	Hemoglobin_A1c
PM3067	LDL.HDL_Ratio	-0.974679	0.00481823	2.31711	Exposome (chemical)	Tetrabromobisphenol A diallyl ether	Blood test	LDL.HDL_Ratio
NM1254	IL17A	0.974679	0.00481823	2.31711	Exposome (chemical)	Salicylic acid	Cytokine	IL17A
NM1254	GROA	0.974679	0.00481823	2.31711	Exposome (chemical)	Salicylic acid	Cytokine	GROA
NM1254	MCP3	0.974679	0.00481823	2.31711	Exposome (chemical)	Salicylic acid	Cytokine	MCP3
NM1446	IL17A	-1	0.0166667	1.77815	Exposome (chemical)	Trimethyl Phosphate	Cytokine	IL17A
NM1446	MCP3	-1	0.0166667	1.77815	Exposome (chemical)	Trimethyl Phosphate	Cytokine	MCP3
NM1550	IL6	1	0.0166667	1.77815	Exposome (chemical)	4-Chloro-o-toluidine	Cytokine	IL6
NM1550	NGF	1	0.0166667	1.77815	Exposome (chemical)	4-Chloro-o-toluidine	Cytokine	NGF
NM1550	IL12P40	1	0.0166667	1.77815	Exposome (chemical)	4-Chloro-o-toluidine	Cytokine	IL12P40
NM1550	IL15	1	0.0166667	1.77815	Exposome (chemical)	4-Chloro-o-toluidine	Cytokine	IL15
NM1550	ICAM1	1	0.0166667	1.77815	Exposome (chemical)	4-Chloro-o-toluidine	Cytokine	ICAM1
NM2680	IL17A	-1	0.0166667	1.77815	Exposome (chemical)	Tetrachloroethylene	Cytokine	IL17A
NM2680	MCP3	-1	0.0166667	1.77815	Exposome (chemical)	Tetrachloroethylene	Cytokine	MCP3
NM3057	FASL	1	0.0166667	1.77815	Exposome (chemical)	Acephate	Cytokine	FASL
NM3057	IL27	1	0.0166667	1.77815	Exposome (chemical)	Acephate	Cytokine	IL27
NM3057	IL4	1	0.0166667	1.77815	Exposome (chemical)	Acephate	Cytokine	IL4
NM3057	IL5	1	0.0166667	1.77815	Exposome (chemical)	Acephate	Cytokine	IL5
NM3057	IL7	1	0.0166667	1.77815	Exposome (chemical)	Acephate	Cytokine	IL7
NM3057	IFNB	1	0.0166667	1.77815	Exposome (chemical)	Acephate	Cytokine	IFNB
NM3057	IL13	1	0.0166667	1.77815	Exposome (chemical)	Acephate	Cytokine	IL13
NM3057	IL31	1	0.0166667	1.77815	Exposome (chemical)	Acephate	Cytokine	IL31
NM3057	IFNG	1	0.0166667	1.77815	Exposome (chemical)	Acephate	Cytokine	IFNG
NM3057	GCSF	1	0.0166667	1.77815	Exposome (chemical)	Acephate	Cytokine	GCSF
NM4303	CHEX4	-0.974679	0.00481823	2.31711	Exposome (chemical)	Fenazaquin	Cytokine	CHEX4
NM4337	IL17A	1	0.0166667	1.77815	Exposome (chemical)	Zeranol	Cytokine	IL17A
NM4337	MCP3	1	0.0166667	1.77815	Exposome (chemical)	Zeranol	Cytokine	MCP3
PM1171	IL23	1	0.0166667	1.77815	Exposome (chemical)	Triethyl phosphate	Cytokine	IL23
PM1880	IL6	1	0.0166667	1.77815	Exposome (chemical)	p-Hydroxy-meta-chlorophenylpiperazine	Cytokine	IL6
PM1880	NGF	1	0.0166667	1.77815	Exposome (chemical)	p-Hydroxy-meta-chlorophenylpiperazine	Cytokine	NGF
PM1880	IL12P40	1	0.0166667	1.77815	Exposome (chemical)	p-Hydroxy-meta-chlorophenylpiperazine	Cytokine	IL12P40
PM1880	IL15	1	0.0166667	1.77815	Exposome (chemical)	p-Hydroxy-meta-chlorophenylpiperazine	Cytokine	IL15
PM1880	ICAM1	1	0.0166667	1.77815	Exposome (chemical)	p-Hydroxy-meta-chlorophenylpiperazine	Cytokine	ICAM1
PM1935	IL17A	1	0.0166667	1.77815	Exposome (chemical)	Pymetrozin	Cytokine	IL17A
PM1935	MCP3	1	0.0166667	1.77815	Exposome (chemical)	Pymetrozin	Cytokine	MCP3
PM2296	EGF	1	0.0166667	1.77815	Exposome (chemical)	Cyproconazole	Cytokine	EGF
PM2296	CD40L	1	0.0166667	1.77815	Exposome (chemical)	Cyproconazole	Cytokine	CD40L
PM2342	LIF	1	0.0166667	1.77815	Exposome (chemical)	Butylated triphenyl phosphate	Cytokine	LIF
PM2541	IP10	-1	0.0166667	1.77815	Exposome (chemical)	Amoxicillin	Cytokine	IP10
PM2541	IL21	-1	0.0166667	1.77815	Exposome (chemical)	Amoxicillin	Cytokine	IL21
PM2541	CHEX3	-1	0.0166667	1.77815	Exposome (chemical)	Amoxicillin	Cytokine	CHEX3
PM2549	IL1B	1	0.0166667	1.77815	Exposome (chemical)	Tricresyl phosphate	Cytokine	IL1B
PM3067	CHEX4	-1	0.0166667	1.77815	Exposome (chemical)	Tetrabromobisphenol A diallyl ether	Cytokine	CHEX4
NM0104	class_Bacilli	1	0.0166667	1.77815	Exposome (chemical)	Ethyl carbamate	Gut microbiome	class_Bacilli
NM0104	order_Lactobacillales	1	0.0166667	1.77815	Exposome (chemical)	Ethyl carbamate	Gut microbiome	order_Lactobacillales
NM0104	family_Streptococcaceae	1	0.0166667	1.77815	Exposome (chemical)	Ethyl carbamate	Gut microbiome	family_Streptococcaceae
NM0522	class_Betaproteobacteria	-1	0.0166667	1.77815	Exposome (chemical)	Hexanoic acid	Gut microbiome	class_Betaproteobacteria
NM0522	order_Burkholderiales	-1	0.0166667	1.77815	Exposome (chemical)	Hexanoic acid	Gut microbiome	order_Burkholderiales
NM0522	family_Clostridiaceae.1	1	0.0166667	1.77815	Exposome (chemical)	Hexanoic acid	Gut microbiome	family_Clostridiaceae.1
NM0522	family_Rikenellaceae	1	0.0166667	1.77815	Exposome (chemical)	Hexanoic acid	Gut microbiome	family_Rikenellaceae
NM0522	family_Sutterellaceae	-1	0.0166667	1.77815	Exposome (chemical)	Hexanoic acid	Gut microbiome	family_Sutterellaceae
NM0522	genus_Alistipes	1	0.0166667	1.77815	Exposome (chemical)	Hexanoic acid	Gut microbiome	genus_Alistipes
NM0522	genus_Clostridium.sensu.stricto	1	0.0166667	1.77815	Exposome (chemical)	Hexanoic acid	Gut microbiome	genus_Clostridium.sensu.stricto
NM0522	genus_Eggerthella	1	0.0166667	1.77815	Exposome (chemical)	Hexanoic acid	Gut microbiome	genus_Eggerthella
NM0522	genus_Odoribacter	1	0.0166667	1.77815	Exposome (chemical)	Hexanoic acid	Gut microbiome	genus_Odoribacter
NM0522	genus_Parasutterella	1	0.0166667	1.77815	Exposome (chemical)	Hexanoic acid	Gut microbiome	genus_Parasutterella
NM0522	genus_Roseburia	-1	0.0166667	1.77815	Exposome (chemical)	Hexanoic acid	Gut microbiome	genus_Roseburia
NM1145	genus_Barnesiella	-1	0.0166667	1.77815	Exposome (chemical)	4-Nitrotoluene	Gut microbiome	genus_Barnesiella
NM1145	genus_Clostridium.IV	-1	0.0166667	1.77815	Exposome (chemical)	4-Nitrotoluene	Gut microbiome	genus_Clostridium.IV
NM1145	genus_unclassified_Ruminococcaceae	-1	0.0166667	1.77815	Exposome (chemical)	4-Nitrotoluene	Gut microbiome	genus_unclassified_Ruminococcaceae
NM1240	family_Peptostreptococcaceae	-1	0.0166667	1.77815	Exposome (chemical)	4-Hydroxybenzoic acid	Gut microbiome	family_Peptostreptococcaceae
NM1240	family_unclassified_Clostridiales	1	0.0166667	1.77815	Exposome (chemical)	4-Hydroxybenzoic acid	Gut microbiome	family_unclassified_Clostridiales
NM1240	genus_Clostridium.XI	-1	0.0166667	1.77815	Exposome (chemical)	4-Hydroxybenzoic acid	Gut microbiome	genus_Clostridium.XI
NM1240	genus_Clostridium.XlVa	-1	0.0166667	1.77815	Exposome (chemical)	4-Hydroxybenzoic acid	Gut microbiome	genus_Clostridium.XlVa
NM1240	genus_unclassified_Clostridiales	1	0.0166667	1.77815	Exposome (chemical)	4-Hydroxybenzoic acid	Gut microbiome	genus_unclassified_Clostridiales
NM1340	class_Betaproteobacteria	-1	0.0166667	1.77815	Exposome (chemical)	4-Nitrophenol	Gut microbiome	class_Betaproteobacteria
NM1340	order_Burkholderiales	-1	0.0166667	1.77815	Exposome (chemical)	4-Nitrophenol	Gut microbiome	order_Burkholderiales
NM1340	family_Clostridiaceae.1	1	0.0166667	1.77815	Exposome (chemical)	4-Nitrophenol	Gut microbiome	family_Clostridiaceae.1
NM1340	family_Rikenellaceae	1	0.0166667	1.77815	Exposome (chemical)	4-Nitrophenol	Gut microbiome	family_Rikenellaceae
NM1340	family_Sutterellaceae	-1	0.0166667	1.77815	Exposome (chemical)	4-Nitrophenol	Gut microbiome	family_Sutterellaceae
NM1340	genus_Alistipes	1	0.0166667	1.77815	Exposome (chemical)	4-Nitrophenol	Gut microbiome	genus_Alistipes
NM1340	genus_Clostridium.sensu.stricto	1	0.0166667	1.77815	Exposome (chemical)	4-Nitrophenol	Gut microbiome	genus_Clostridium.sensu.stricto
NM1340	genus_Eggerthella	1	0.0166667	1.77815	Exposome (chemical)	4-Nitrophenol	Gut microbiome	genus_Eggerthella
NM1340	genus_Odoribacter	1	0.0166667	1.77815	Exposome (chemical)	4-Nitrophenol	Gut microbiome	genus_Odoribacter
NM1340	genus_Parasutterella	1	0.0166667	1.77815	Exposome (chemical)	4-Nitrophenol	Gut microbiome	genus_Parasutterella
NM1340	genus_Roseburia	-1	0.0166667	1.77815	Exposome (chemical)	4-Nitrophenol	Gut microbiome	genus_Roseburia
NM1446	class_Betaproteobacteria	-1	0.0166667	1.77815	Exposome (chemical)	Trimethyl Phosphate	Gut microbiome	class_Betaproteobacteria
NM1446	order_Burkholderiales	-1	0.0166667	1.77815	Exposome (chemical)	Trimethyl Phosphate	Gut microbiome	order_Burkholderiales
NM1446	family_Clostridiaceae.1	1	0.0166667	1.77815	Exposome (chemical)	Trimethyl Phosphate	Gut microbiome	family_Clostridiaceae.1
NM1446	family_Rikenellaceae	1	0.0166667	1.77815	Exposome (chemical)	Trimethyl Phosphate	Gut microbiome	family_Rikenellaceae
NM1446	family_Sutterellaceae	-1	0.0166667	1.77815	Exposome (chemical)	Trimethyl Phosphate	Gut microbiome	family_Sutterellaceae
NM1446	genus_Alistipes	1	0.0166667	1.77815	Exposome (chemical)	Trimethyl Phosphate	Gut microbiome	genus_Alistipes
NM1446	genus_Clostridium.sensu.stricto	1	0.0166667	1.77815	Exposome (chemical)	Trimethyl Phosphate	Gut microbiome	genus_Clostridium.sensu.stricto
NM1446	genus_Eggerthella	1	0.0166667	1.77815	Exposome (chemical)	Trimethyl Phosphate	Gut microbiome	genus_Eggerthella
NM1446	genus_Odoribacter	1	0.0166667	1.77815	Exposome (chemical)	Trimethyl Phosphate	Gut microbiome	genus_Odoribacter
NM1446	genus_Parasutterella	1	0.0166667	1.77815	Exposome (chemical)	Trimethyl Phosphate	Gut microbiome	genus_Parasutterella
NM1446	genus_Roseburia	-1	0.0166667	1.77815	Exposome (chemical)	Trimethyl Phosphate	Gut microbiome	genus_Roseburia
NM1550	phylum_Verrucomicrobia	-1	0.0166667	1.77815	Exposome (chemical)	4-Chloro-o-toluidine	Gut microbiome	phylum_Verrucomicrobia
NM1550	class_Verrucomicrobiae	-1	0.0166667	1.77815	Exposome (chemical)	4-Chloro-o-toluidine	Gut microbiome	class_Verrucomicrobiae
NM1550	order_Verrucomicrobiales	-1	0.0166667	1.77815	Exposome (chemical)	4-Chloro-o-toluidine	Gut microbiome	order_Verrucomicrobiales
NM1550	family_Verrucomicrobiaceae	-1	0.0166667	1.77815	Exposome (chemical)	4-Chloro-o-toluidine	Gut microbiome	family_Verrucomicrobiaceae
NM1550	genus_Akkermansia	-1	0.0166667	1.77815	Exposome (chemical)	4-Chloro-o-toluidine	Gut microbiome	genus_Akkermansia
NM1550	genus_Oscillibacter	-1	0.0166667	1.77815	Exposome (chemical)	4-Chloro-o-toluidine	Gut microbiome	genus_Oscillibacter
NM1550	genus_Parabacteroides	-1	0.0166667	1.77815	Exposome (chemical)	4-Chloro-o-toluidine	Gut microbiome	genus_Parabacteroides
NM2328	family_Peptostreptococcaceae	-1	0.0166667	1.77815	Exposome (chemical)	Methylparaben	Gut microbiome	family_Peptostreptococcaceae
NM2328	family_unclassified_Clostridiales	1	0.0166667	1.77815	Exposome (chemical)	Methylparaben	Gut microbiome	family_unclassified_Clostridiales
NM2328	genus_Clostridium.XI	-1	0.0166667	1.77815	Exposome (chemical)	Methylparaben	Gut microbiome	genus_Clostridium.XI
NM2328	genus_Clostridium.XlVa	-1	0.0166667	1.77815	Exposome (chemical)	Methylparaben	Gut microbiome	genus_Clostridium.XlVa
NM2328	genus_unclassified_Clostridiales	1	0.0166667	1.77815	Exposome (chemical)	Methylparaben	Gut microbiome	genus_unclassified_Clostridiales
NM3853	class_Bacilli	1	0.0166667	1.77815	Exposome (chemical)	Dinoseb	Gut microbiome	class_Bacilli
NM3853	order_Lactobacillales	1	0.0166667	1.77815	Exposome (chemical)	Dinoseb	Gut microbiome	order_Lactobacillales
NM3853	family_Streptococcaceae	1	0.0166667	1.77815	Exposome (chemical)	Dinoseb	Gut microbiome	family_Streptococcaceae
NM4256	phylum_Verrucomicrobia	1	0.0166667	1.77815	Exposome (chemical)	Diclofenac	Gut microbiome	phylum_Verrucomicrobia
NM4256	class_Verrucomicrobiae	1	0.0166667	1.77815	Exposome (chemical)	Diclofenac	Gut microbiome	class_Verrucomicrobiae
NM4256	order_Verrucomicrobiales	1	0.0166667	1.77815	Exposome (chemical)	Diclofenac	Gut microbiome	order_Verrucomicrobiales
NM4256	family_Verrucomicrobiaceae	1	0.0166667	1.77815	Exposome (chemical)	Diclofenac	Gut microbiome	family_Verrucomicrobiaceae
NM4256	genus_Akkermansia	1	0.0166667	1.77815	Exposome (chemical)	Diclofenac	Gut microbiome	genus_Akkermansia
NM4256	genus_Oscillibacter	1	0.0166667	1.77815	Exposome (chemical)	Diclofenac	Gut microbiome	genus_Oscillibacter
NM4256	genus_Parabacteroides	1	0.0166667	1.77815	Exposome (chemical)	Diclofenac	Gut microbiome	genus_Parabacteroides
NM4280	genus_unclassified_Coriobacteriaceae	1	0.0166667	1.77815	Exposome (chemical)	Captan	Gut microbiome	genus_unclassified_Coriobacteriaceae
NM4281	class_Betaproteobacteria	-1	0.0166667	1.77815	Exposome (chemical)	Saxitoxin	Gut microbiome	class_Betaproteobacteria
NM4281	order_Burkholderiales	-1	0.0166667	1.77815	Exposome (chemical)	Saxitoxin	Gut microbiome	order_Burkholderiales
NM4281	family_Clostridiaceae.1	1	0.0166667	1.77815	Exposome (chemical)	Saxitoxin	Gut microbiome	family_Clostridiaceae.1
NM4281	family_Rikenellaceae	1	0.0166667	1.77815	Exposome (chemical)	Saxitoxin	Gut microbiome	family_Rikenellaceae
NM4281	family_Sutterellaceae	-1	0.0166667	1.77815	Exposome (chemical)	Saxitoxin	Gut microbiome	family_Sutterellaceae
NM4281	genus_Alistipes	1	0.0166667	1.77815	Exposome (chemical)	Saxitoxin	Gut microbiome	genus_Alistipes
NM4281	genus_Clostridium.sensu.stricto	1	0.0166667	1.77815	Exposome (chemical)	Saxitoxin	Gut microbiome	genus_Clostridium.sensu.stricto
NM4281	genus_Eggerthella	1	0.0166667	1.77815	Exposome (chemical)	Saxitoxin	Gut microbiome	genus_Eggerthella
NM4281	genus_Odoribacter	1	0.0166667	1.77815	Exposome (chemical)	Saxitoxin	Gut microbiome	genus_Odoribacter
NM4281	genus_Parasutterella	1	0.0166667	1.77815	Exposome (chemical)	Saxitoxin	Gut microbiome	genus_Parasutterella
NM4281	genus_Roseburia	-1	0.0166667	1.77815	Exposome (chemical)	Saxitoxin	Gut microbiome	genus_Roseburia
NM4287	phylum_Verrucomicrobia	1	0.0166667	1.77815	Exposome (chemical)	Perfluorobutanesulfonic acid (PFBS)	Gut microbiome	phylum_Verrucomicrobia
NM4287	class_Verrucomicrobiae	1	0.0166667	1.77815	Exposome (chemical)	Perfluorobutanesulfonic acid (PFBS)	Gut microbiome	class_Verrucomicrobiae
NM4287	order_Verrucomicrobiales	1	0.0166667	1.77815	Exposome (chemical)	Perfluorobutanesulfonic acid (PFBS)	Gut microbiome	order_Verrucomicrobiales
NM4287	family_Verrucomicrobiaceae	1	0.0166667	1.77815	Exposome (chemical)	Perfluorobutanesulfonic acid (PFBS)	Gut microbiome	family_Verrucomicrobiaceae
NM4287	genus_Akkermansia	1	0.0166667	1.77815	Exposome (chemical)	Perfluorobutanesulfonic acid (PFBS)	Gut microbiome	genus_Akkermansia
NM4287	genus_Oscillibacter	1	0.0166667	1.77815	Exposome (chemical)	Perfluorobutanesulfonic acid (PFBS)	Gut microbiome	genus_Oscillibacter
NM4287	genus_Parabacteroides	1	0.0166667	1.77815	Exposome (chemical)	Perfluorobutanesulfonic acid (PFBS)	Gut microbiome	genus_Parabacteroides
NM4327	family_Porphyromonadaceae	1	0.0166667	1.77815	Exposome (chemical)	Aflatoxin B2	Gut microbiome	family_Porphyromonadaceae
NM4327	family_Veillonellaceae	1	0.0166667	1.77815	Exposome (chemical)	Aflatoxin B2	Gut microbiome	family_Veillonellaceae
NM4327	genus_Butyricimonas	1	0.0166667	1.77815	Exposome (chemical)	Aflatoxin B2	Gut microbiome	genus_Butyricimonas
NM4327	genus_Veillonella	1	0.0166667	1.77815	Exposome (chemical)	Aflatoxin B2	Gut microbiome	genus_Veillonella
NM4337	class_unclassified_Firmicutes	1	0.0166667	1.77815	Exposome (chemical)	Zeranol	Gut microbiome	class_unclassified_Firmicutes
NM4337	order_unclassified_Firmicutes	1	0.0166667	1.77815	Exposome (chemical)	Zeranol	Gut microbiome	order_unclassified_Firmicutes
NM4337	family_unclassified_Firmicutes	1	0.0166667	1.77815	Exposome (chemical)	Zeranol	Gut microbiome	family_unclassified_Firmicutes
NM4337	genus_unclassified_Firmicutes	1	0.0166667	1.77815	Exposome (chemical)	Zeranol	Gut microbiome	genus_unclassified_Firmicutes
NM4350	family_Porphyromonadaceae	1	0.0166667	1.77815	Exposome (chemical)	Hexachloronaphthalene	Gut microbiome	family_Porphyromonadaceae
NM4350	family_Veillonellaceae	1	0.0166667	1.77815	Exposome (chemical)	Hexachloronaphthalene	Gut microbiome	family_Veillonellaceae
NM4350	genus_Butyricimonas	1	0.0166667	1.77815	Exposome (chemical)	Hexachloronaphthalene	Gut microbiome	genus_Butyricimonas
NM4350	genus_Veillonella	1	0.0166667	1.77815	Exposome (chemical)	Hexachloronaphthalene	Gut microbiome	genus_Veillonella
PM0034	phylum_Verrucomicrobia	1	0.0166667	1.77815	Exposome (chemical)	1,4-Dioxane	Gut microbiome	phylum_Verrucomicrobia
PM0034	class_Verrucomicrobiae	1	0.0166667	1.77815	Exposome (chemical)	1,4-Dioxane	Gut microbiome	class_Verrucomicrobiae
PM0034	order_Verrucomicrobiales	1	0.0166667	1.77815	Exposome (chemical)	1,4-Dioxane	Gut microbiome	order_Verrucomicrobiales
PM0034	family_Verrucomicrobiaceae	1	0.0166667	1.77815	Exposome (chemical)	1,4-Dioxane	Gut microbiome	family_Verrucomicrobiaceae
PM0034	genus_Akkermansia	1	0.0166667	1.77815	Exposome (chemical)	1,4-Dioxane	Gut microbiome	genus_Akkermansia
PM0034	genus_Oscillibacter	1	0.0166667	1.77815	Exposome (chemical)	1,4-Dioxane	Gut microbiome	genus_Oscillibacter
PM0034	genus_Parabacteroides	1	0.0166667	1.77815	Exposome (chemical)	1,4-Dioxane	Gut microbiome	genus_Parabacteroides
PM0320	phylum_Verrucomicrobia	1	0.0166667	1.77815	Exposome (chemical)	N-Nitrosodiethylamine	Gut microbiome	phylum_Verrucomicrobia
PM0320	class_Verrucomicrobiae	1	0.0166667	1.77815	Exposome (chemical)	N-Nitrosodiethylamine	Gut microbiome	class_Verrucomicrobiae
PM0320	order_Verrucomicrobiales	1	0.0166667	1.77815	Exposome (chemical)	N-Nitrosodiethylamine	Gut microbiome	order_Verrucomicrobiales
PM0320	family_Verrucomicrobiaceae	1	0.0166667	1.77815	Exposome (chemical)	N-Nitrosodiethylamine	Gut microbiome	family_Verrucomicrobiaceae
PM0320	genus_Akkermansia	1	0.0166667	1.77815	Exposome (chemical)	N-Nitrosodiethylamine	Gut microbiome	genus_Akkermansia
PM0320	genus_Oscillibacter	1	0.0166667	1.77815	Exposome (chemical)	N-Nitrosodiethylamine	Gut microbiome	genus_Oscillibacter
PM0320	genus_Parabacteroides	1	0.0166667	1.77815	Exposome (chemical)	N-Nitrosodiethylamine	Gut microbiome	genus_Parabacteroides
PM0466	genus_unclassified_Coriobacteriaceae	1	0.0166667	1.77815	Exposome (chemical)	Styrene	Gut microbiome	genus_unclassified_Coriobacteriaceae
PM0594	class_Bacilli	-1	0.0166667	1.77815	Exposome (chemical)	Diethylene glycol	Gut microbiome	class_Bacilli
PM0594	order_Lactobacillales	-1	0.0166667	1.77815	Exposome (chemical)	Diethylene glycol	Gut microbiome	order_Lactobacillales
PM0594	family_Streptococcaceae	-1	0.0166667	1.77815	Exposome (chemical)	Diethylene glycol	Gut microbiome	family_Streptococcaceae
PM0626	class_Betaproteobacteria	-1	0.0166667	1.77815	Exposome (chemical)	o-Toluidine	Gut microbiome	class_Betaproteobacteria
PM0626	order_Burkholderiales	-1	0.0166667	1.77815	Exposome (chemical)	o-Toluidine	Gut microbiome	order_Burkholderiales
PM0626	family_Clostridiaceae.1	1	0.0166667	1.77815	Exposome (chemical)	o-Toluidine	Gut microbiome	family_Clostridiaceae.1
PM0626	family_Rikenellaceae	1	0.0166667	1.77815	Exposome (chemical)	o-Toluidine	Gut microbiome	family_Rikenellaceae
PM0626	family_Sutterellaceae	-1	0.0166667	1.77815	Exposome (chemical)	o-Toluidine	Gut microbiome	family_Sutterellaceae
PM0626	genus_Alistipes	1	0.0166667	1.77815	Exposome (chemical)	o-Toluidine	Gut microbiome	genus_Alistipes
PM0626	genus_Clostridium.sensu.stricto	1	0.0166667	1.77815	Exposome (chemical)	o-Toluidine	Gut microbiome	genus_Clostridium.sensu.stricto
PM0626	genus_Eggerthella	1	0.0166667	1.77815	Exposome (chemical)	o-Toluidine	Gut microbiome	genus_Eggerthella
PM0626	genus_Odoribacter	1	0.0166667	1.77815	Exposome (chemical)	o-Toluidine	Gut microbiome	genus_Odoribacter
PM0626	genus_Parasutterella	1	0.0166667	1.77815	Exposome (chemical)	o-Toluidine	Gut microbiome	genus_Parasutterella
PM0626	genus_Roseburia	-1	0.0166667	1.77815	Exposome (chemical)	o-Toluidine	Gut microbiome	genus_Roseburia
PM0682	family_Porphyromonadaceae	1	0.0166667	1.77815	Exposome (chemical)	Styrene oxide	Gut microbiome	family_Porphyromonadaceae
PM0682	family_Veillonellaceae	1	0.0166667	1.77815	Exposome (chemical)	Styrene oxide	Gut microbiome	family_Veillonellaceae
PM0682	genus_Butyricimonas	1	0.0166667	1.77815	Exposome (chemical)	Styrene oxide	Gut microbiome	genus_Butyricimonas
PM0682	genus_Veillonella	1	0.0166667	1.77815	Exposome (chemical)	Styrene oxide	Gut microbiome	genus_Veillonella
PM0834	genus_Barnesiella	1	0.0166667	1.77815	Exposome (chemical)	Chloral	Gut microbiome	genus_Barnesiella
PM0834	genus_Clostridium.IV	1	0.0166667	1.77815	Exposome (chemical)	Chloral	Gut microbiome	genus_Clostridium.IV
PM0834	genus_unclassified_Ruminococcaceae	1	0.0166667	1.77815	Exposome (chemical)	Chloral	Gut microbiome	genus_unclassified_Ruminococcaceae
PM0964	family_Peptostreptococcaceae	-1	0.0166667	1.77815	Exposome (chemical)	Chloronaphthalene	Gut microbiome	family_Peptostreptococcaceae
PM0964	family_unclassified_Clostridiales	1	0.0166667	1.77815	Exposome (chemical)	Chloronaphthalene	Gut microbiome	family_unclassified_Clostridiales
PM0964	genus_Clostridium.XI	-1	0.0166667	1.77815	Exposome (chemical)	Chloronaphthalene	Gut microbiome	genus_Clostridium.XI
PM0964	genus_Clostridium.XlVa	-1	0.0166667	1.77815	Exposome (chemical)	Chloronaphthalene	Gut microbiome	genus_Clostridium.XlVa
PM0964	genus_unclassified_Clostridiales	1	0.0166667	1.77815	Exposome (chemical)	Chloronaphthalene	Gut microbiome	genus_unclassified_Clostridiales
PM0996	class_Betaproteobacteria	-1	0.0166667	1.77815	Exposome (chemical)	Fenuron	Gut microbiome	class_Betaproteobacteria
PM0996	order_Burkholderiales	-1	0.0166667	1.77815	Exposome (chemical)	Fenuron	Gut microbiome	order_Burkholderiales
PM0996	family_Clostridiaceae.1	1	0.0166667	1.77815	Exposome (chemical)	Fenuron	Gut microbiome	family_Clostridiaceae.1
PM0996	family_Rikenellaceae	1	0.0166667	1.77815	Exposome (chemical)	Fenuron	Gut microbiome	family_Rikenellaceae
PM0996	family_Sutterellaceae	-1	0.0166667	1.77815	Exposome (chemical)	Fenuron	Gut microbiome	family_Sutterellaceae
PM0996	genus_Alistipes	1	0.0166667	1.77815	Exposome (chemical)	Fenuron	Gut microbiome	genus_Alistipes
PM0996	genus_Clostridium.sensu.stricto	1	0.0166667	1.77815	Exposome (chemical)	Fenuron	Gut microbiome	genus_Clostridium.sensu.stricto
PM0996	genus_Eggerthella	1	0.0166667	1.77815	Exposome (chemical)	Fenuron	Gut microbiome	genus_Eggerthella
PM0996	genus_Odoribacter	1	0.0166667	1.77815	Exposome (chemical)	Fenuron	Gut microbiome	genus_Odoribacter
PM0996	genus_Parasutterella	1	0.0166667	1.77815	Exposome (chemical)	Fenuron	Gut microbiome	genus_Parasutterella
PM0996	genus_Roseburia	-1	0.0166667	1.77815	Exposome (chemical)	Fenuron	Gut microbiome	genus_Roseburia
PM1013	class_Bacilli	-1	0.0166667	1.77815	Exposome (chemical)	Phthalic acid	Gut microbiome	class_Bacilli
PM1013	order_Lactobacillales	-1	0.0166667	1.77815	Exposome (chemical)	Phthalic acid	Gut microbiome	order_Lactobacillales
PM1013	family_Streptococcaceae	-1	0.0166667	1.77815	Exposome (chemical)	Phthalic acid	Gut microbiome	family_Streptococcaceae
PM1040	phylum_Verrucomicrobia	1	0.0166667	1.77815	Exposome (chemical)	4-Ipomeanol	Gut microbiome	phylum_Verrucomicrobia
PM1040	class_Verrucomicrobiae	1	0.0166667	1.77815	Exposome (chemical)	4-Ipomeanol	Gut microbiome	class_Verrucomicrobiae
PM1040	order_Verrucomicrobiales	1	0.0166667	1.77815	Exposome (chemical)	4-Ipomeanol	Gut microbiome	order_Verrucomicrobiales
PM1040	family_Verrucomicrobiaceae	1	0.0166667	1.77815	Exposome (chemical)	4-Ipomeanol	Gut microbiome	family_Verrucomicrobiaceae
PM1040	genus_Akkermansia	1	0.0166667	1.77815	Exposome (chemical)	4-Ipomeanol	Gut microbiome	genus_Akkermansia
PM1040	genus_Oscillibacter	1	0.0166667	1.77815	Exposome (chemical)	4-Ipomeanol	Gut microbiome	genus_Oscillibacter
PM1040	genus_Parabacteroides	1	0.0166667	1.77815	Exposome (chemical)	4-Ipomeanol	Gut microbiome	genus_Parabacteroides
PM1048	genus_Barnesiella	1	0.0166667	1.77815	Exposome (chemical)	Glyphosate	Gut microbiome	genus_Barnesiella
PM1048	genus_Clostridium.IV	1	0.0166667	1.77815	Exposome (chemical)	Glyphosate	Gut microbiome	genus_Clostridium.IV
PM1048	genus_unclassified_Ruminococcaceae	1	0.0166667	1.77815	Exposome (chemical)	Glyphosate	Gut microbiome	genus_unclassified_Ruminococcaceae
PM1062	genus_unclassified_Coriobacteriaceae	1	0.0166667	1.77815	Exposome (chemical)	Decanoic acid	Gut microbiome	genus_unclassified_Coriobacteriaceae
PM1149	genus_Barnesiella	1	0.0166667	1.77815	Exposome (chemical)	Aspirin	Gut microbiome	genus_Barnesiella
PM1149	genus_Clostridium.IV	1	0.0166667	1.77815	Exposome (chemical)	Aspirin	Gut microbiome	genus_Clostridium.IV
PM1149	genus_unclassified_Ruminococcaceae	1	0.0166667	1.77815	Exposome (chemical)	Aspirin	Gut microbiome	genus_unclassified_Ruminococcaceae
PM1171	class_unclassified_Firmicutes	1	0.0166667	1.77815	Exposome (chemical)	Triethyl phosphate	Gut microbiome	class_unclassified_Firmicutes
PM1171	order_unclassified_Firmicutes	1	0.0166667	1.77815	Exposome (chemical)	Triethyl phosphate	Gut microbiome	order_unclassified_Firmicutes
PM1171	family_unclassified_Firmicutes	1	0.0166667	1.77815	Exposome (chemical)	Triethyl phosphate	Gut microbiome	family_unclassified_Firmicutes
PM1171	genus_unclassified_Firmicutes	1	0.0166667	1.77815	Exposome (chemical)	Triethyl phosphate	Gut microbiome	genus_unclassified_Firmicutes
PM1307	phylum_Verrucomicrobia	1	0.0166667	1.77815	Exposome (chemical)	Dibromoethane	Gut microbiome	phylum_Verrucomicrobia
PM1307	class_Verrucomicrobiae	1	0.0166667	1.77815	Exposome (chemical)	Dibromoethane	Gut microbiome	class_Verrucomicrobiae
PM1307	order_Verrucomicrobiales	1	0.0166667	1.77815	Exposome (chemical)	Dibromoethane	Gut microbiome	order_Verrucomicrobiales
PM1307	family_Verrucomicrobiaceae	1	0.0166667	1.77815	Exposome (chemical)	Dibromoethane	Gut microbiome	family_Verrucomicrobiaceae
PM1307	genus_Akkermansia	1	0.0166667	1.77815	Exposome (chemical)	Dibromoethane	Gut microbiome	genus_Akkermansia
PM1307	genus_Oscillibacter	1	0.0166667	1.77815	Exposome (chemical)	Dibromoethane	Gut microbiome	genus_Oscillibacter
PM1307	genus_Parabacteroides	1	0.0166667	1.77815	Exposome (chemical)	Dibromoethane	Gut microbiome	genus_Parabacteroides
PM1499	class_Betaproteobacteria	-1	0.0166667	1.77815	Exposome (chemical)	Aldicarb	Gut microbiome	class_Betaproteobacteria
PM1499	order_Burkholderiales	-1	0.0166667	1.77815	Exposome (chemical)	Aldicarb	Gut microbiome	order_Burkholderiales
PM1499	family_Clostridiaceae.1	1	0.0166667	1.77815	Exposome (chemical)	Aldicarb	Gut microbiome	family_Clostridiaceae.1
PM1499	family_Rikenellaceae	1	0.0166667	1.77815	Exposome (chemical)	Aldicarb	Gut microbiome	family_Rikenellaceae
PM1499	family_Sutterellaceae	-1	0.0166667	1.77815	Exposome (chemical)	Aldicarb	Gut microbiome	family_Sutterellaceae
PM1499	genus_Alistipes	1	0.0166667	1.77815	Exposome (chemical)	Aldicarb	Gut microbiome	genus_Alistipes
PM1499	genus_Clostridium.sensu.stricto	1	0.0166667	1.77815	Exposome (chemical)	Aldicarb	Gut microbiome	genus_Clostridium.sensu.stricto
PM1499	genus_Eggerthella	1	0.0166667	1.77815	Exposome (chemical)	Aldicarb	Gut microbiome	genus_Eggerthella
PM1499	genus_Odoribacter	1	0.0166667	1.77815	Exposome (chemical)	Aldicarb	Gut microbiome	genus_Odoribacter
PM1499	genus_Parasutterella	1	0.0166667	1.77815	Exposome (chemical)	Aldicarb	Gut microbiome	genus_Parasutterella
PM1499	genus_Roseburia	-1	0.0166667	1.77815	Exposome (chemical)	Aldicarb	Gut microbiome	genus_Roseburia
PM1527	genus_Barnesiella	1	0.0166667	1.77815	Exposome (chemical)	Diethyltoluamide	Gut microbiome	genus_Barnesiella
PM1527	genus_Clostridium.IV	1	0.0166667	1.77815	Exposome (chemical)	Diethyltoluamide	Gut microbiome	genus_Clostridium.IV
PM1527	genus_unclassified_Ruminococcaceae	1	0.0166667	1.77815	Exposome (chemical)	Diethyltoluamide	Gut microbiome	genus_unclassified_Ruminococcaceae
PM1704	family_Peptostreptococcaceae	-1	0.0166667	1.77815	Exposome (chemical)	Dichloronaphthalene	Gut microbiome	family_Peptostreptococcaceae
PM1704	family_unclassified_Clostridiales	1	0.0166667	1.77815	Exposome (chemical)	Dichloronaphthalene	Gut microbiome	family_unclassified_Clostridiales
PM1704	genus_Clostridium.XI	-1	0.0166667	1.77815	Exposome (chemical)	Dichloronaphthalene	Gut microbiome	genus_Clostridium.XI
PM1704	genus_Clostridium.XlVa	-1	0.0166667	1.77815	Exposome (chemical)	Dichloronaphthalene	Gut microbiome	genus_Clostridium.XlVa
PM1704	genus_unclassified_Clostridiales	1	0.0166667	1.77815	Exposome (chemical)	Dichloronaphthalene	Gut microbiome	genus_unclassified_Clostridiales
PM1795	class_Betaproteobacteria	-1	0.0166667	1.77815	Exposome (chemical)	Bisphenol F	Gut microbiome	class_Betaproteobacteria
PM1795	order_Burkholderiales	-1	0.0166667	1.77815	Exposome (chemical)	Bisphenol F	Gut microbiome	order_Burkholderiales
PM1795	family_Clostridiaceae.1	1	0.0166667	1.77815	Exposome (chemical)	Bisphenol F	Gut microbiome	family_Clostridiaceae.1
PM1795	family_Rikenellaceae	1	0.0166667	1.77815	Exposome (chemical)	Bisphenol F	Gut microbiome	family_Rikenellaceae
PM1795	family_Sutterellaceae	-1	0.0166667	1.77815	Exposome (chemical)	Bisphenol F	Gut microbiome	family_Sutterellaceae
PM1795	genus_Alistipes	1	0.0166667	1.77815	Exposome (chemical)	Bisphenol F	Gut microbiome	genus_Alistipes
PM1795	genus_Clostridium.sensu.stricto	1	0.0166667	1.77815	Exposome (chemical)	Bisphenol F	Gut microbiome	genus_Clostridium.sensu.stricto
PM1795	genus_Eggerthella	1	0.0166667	1.77815	Exposome (chemical)	Bisphenol F	Gut microbiome	genus_Eggerthella
PM1795	genus_Odoribacter	1	0.0166667	1.77815	Exposome (chemical)	Bisphenol F	Gut microbiome	genus_Odoribacter
PM1795	genus_Parasutterella	1	0.0166667	1.77815	Exposome (chemical)	Bisphenol F	Gut microbiome	genus_Parasutterella
PM1795	genus_Roseburia	-1	0.0166667	1.77815	Exposome (chemical)	Bisphenol F	Gut microbiome	genus_Roseburia
PM1811	class_Betaproteobacteria	-1	0.0166667	1.77815	Exposome (chemical)	Fluoranthene	Gut microbiome	class_Betaproteobacteria
PM1811	order_Burkholderiales	-1	0.0166667	1.77815	Exposome (chemical)	Fluoranthene	Gut microbiome	order_Burkholderiales
PM1811	family_Clostridiaceae.1	1	0.0166667	1.77815	Exposome (chemical)	Fluoranthene	Gut microbiome	family_Clostridiaceae.1
PM1811	family_Rikenellaceae	1	0.0166667	1.77815	Exposome (chemical)	Fluoranthene	Gut microbiome	family_Rikenellaceae
PM1811	family_Sutterellaceae	-1	0.0166667	1.77815	Exposome (chemical)	Fluoranthene	Gut microbiome	family_Sutterellaceae
PM1811	genus_Alistipes	1	0.0166667	1.77815	Exposome (chemical)	Fluoranthene	Gut microbiome	genus_Alistipes
PM1811	genus_Clostridium.sensu.stricto	1	0.0166667	1.77815	Exposome (chemical)	Fluoranthene	Gut microbiome	genus_Clostridium.sensu.stricto
PM1811	genus_Eggerthella	1	0.0166667	1.77815	Exposome (chemical)	Fluoranthene	Gut microbiome	genus_Eggerthella
PM1811	genus_Odoribacter	1	0.0166667	1.77815	Exposome (chemical)	Fluoranthene	Gut microbiome	genus_Odoribacter
PM1811	genus_Parasutterella	1	0.0166667	1.77815	Exposome (chemical)	Fluoranthene	Gut microbiome	genus_Parasutterella
PM1811	genus_Roseburia	-1	0.0166667	1.77815	Exposome (chemical)	Fluoranthene	Gut microbiome	genus_Roseburia
PM1880	family_Peptostreptococcaceae	-1	0.0166667	1.77815	Exposome (chemical)	p-Hydroxy-meta-chlorophenylpiperazine	Gut microbiome	family_Peptostreptococcaceae
PM1880	family_unclassified_Clostridiales	1	0.0166667	1.77815	Exposome (chemical)	p-Hydroxy-meta-chlorophenylpiperazine	Gut microbiome	family_unclassified_Clostridiales
PM1880	genus_Clostridium.XI	-1	0.0166667	1.77815	Exposome (chemical)	p-Hydroxy-meta-chlorophenylpiperazine	Gut microbiome	genus_Clostridium.XI
PM1880	genus_Clostridium.XlVa	-1	0.0166667	1.77815	Exposome (chemical)	p-Hydroxy-meta-chlorophenylpiperazine	Gut microbiome	genus_Clostridium.XlVa
PM1880	genus_unclassified_Clostridiales	1	0.0166667	1.77815	Exposome (chemical)	p-Hydroxy-meta-chlorophenylpiperazine	Gut microbiome	genus_unclassified_Clostridiales
PM1888	phylum_Verrucomicrobia	1	0.0166667	1.77815	Exposome (chemical)	Omethoate	Gut microbiome	phylum_Verrucomicrobia
PM1888	class_Verrucomicrobiae	1	0.0166667	1.77815	Exposome (chemical)	Omethoate	Gut microbiome	class_Verrucomicrobiae
PM1888	order_Verrucomicrobiales	1	0.0166667	1.77815	Exposome (chemical)	Omethoate	Gut microbiome	order_Verrucomicrobiales
PM1888	family_Verrucomicrobiaceae	1	0.0166667	1.77815	Exposome (chemical)	Omethoate	Gut microbiome	family_Verrucomicrobiaceae
PM1888	genus_Akkermansia	1	0.0166667	1.77815	Exposome (chemical)	Omethoate	Gut microbiome	genus_Akkermansia
PM1888	genus_Oscillibacter	1	0.0166667	1.77815	Exposome (chemical)	Omethoate	Gut microbiome	genus_Oscillibacter
PM1888	genus_Parabacteroides	1	0.0166667	1.77815	Exposome (chemical)	Omethoate	Gut microbiome	genus_Parabacteroides
PM1890	phylum_Verrucomicrobia	1	0.0166667	1.77815	Exposome (chemical)	Simetryn	Gut microbiome	phylum_Verrucomicrobia
PM1890	class_Verrucomicrobiae	1	0.0166667	1.77815	Exposome (chemical)	Simetryn	Gut microbiome	class_Verrucomicrobiae
PM1890	order_Verrucomicrobiales	1	0.0166667	1.77815	Exposome (chemical)	Simetryn	Gut microbiome	order_Verrucomicrobiales
PM1890	family_Verrucomicrobiaceae	1	0.0166667	1.77815	Exposome (chemical)	Simetryn	Gut microbiome	family_Verrucomicrobiaceae
PM1890	genus_Akkermansia	1	0.0166667	1.77815	Exposome (chemical)	Simetryn	Gut microbiome	genus_Akkermansia
PM1890	genus_Oscillibacter	1	0.0166667	1.77815	Exposome (chemical)	Simetryn	Gut microbiome	genus_Oscillibacter
PM1890	genus_Parabacteroides	1	0.0166667	1.77815	Exposome (chemical)	Simetryn	Gut microbiome	genus_Parabacteroides
PM1900	class_Betaproteobacteria	-1	0.0166667	1.77815	Exposome (chemical)	Clofibric acid	Gut microbiome	class_Betaproteobacteria
PM1900	order_Burkholderiales	-1	0.0166667	1.77815	Exposome (chemical)	Clofibric acid	Gut microbiome	order_Burkholderiales
PM1900	family_Clostridiaceae.1	1	0.0166667	1.77815	Exposome (chemical)	Clofibric acid	Gut microbiome	family_Clostridiaceae.1
PM1900	family_Rikenellaceae	1	0.0166667	1.77815	Exposome (chemical)	Clofibric acid	Gut microbiome	family_Rikenellaceae
PM1900	family_Sutterellaceae	-1	0.0166667	1.77815	Exposome (chemical)	Clofibric acid	Gut microbiome	family_Sutterellaceae
PM1900	genus_Alistipes	1	0.0166667	1.77815	Exposome (chemical)	Clofibric acid	Gut microbiome	genus_Alistipes
PM1900	genus_Clostridium.sensu.stricto	1	0.0166667	1.77815	Exposome (chemical)	Clofibric acid	Gut microbiome	genus_Clostridium.sensu.stricto
PM1900	genus_Eggerthella	1	0.0166667	1.77815	Exposome (chemical)	Clofibric acid	Gut microbiome	genus_Eggerthella
PM1900	genus_Odoribacter	1	0.0166667	1.77815	Exposome (chemical)	Clofibric acid	Gut microbiome	genus_Odoribacter
PM1900	genus_Parasutterella	1	0.0166667	1.77815	Exposome (chemical)	Clofibric acid	Gut microbiome	genus_Parasutterella
PM1900	genus_Roseburia	-1	0.0166667	1.77815	Exposome (chemical)	Clofibric acid	Gut microbiome	genus_Roseburia
PM1902	genus_unclassified_Coriobacteriaceae	1	0.0166667	1.77815	Exposome (chemical)	Metribuzin	Gut microbiome	genus_unclassified_Coriobacteriaceae
PM1926	class_Betaproteobacteria	-1	0.0166667	1.77815	Exposome (chemical)	7H-Benzo[c]fluorene	Gut microbiome	class_Betaproteobacteria
PM1926	order_Burkholderiales	-1	0.0166667	1.77815	Exposome (chemical)	7H-Benzo[c]fluorene	Gut microbiome	order_Burkholderiales
PM1926	family_Clostridiaceae.1	1	0.0166667	1.77815	Exposome (chemical)	7H-Benzo[c]fluorene	Gut microbiome	family_Clostridiaceae.1
PM1926	family_Rikenellaceae	1	0.0166667	1.77815	Exposome (chemical)	7H-Benzo[c]fluorene	Gut microbiome	family_Rikenellaceae
PM1926	family_Sutterellaceae	-1	0.0166667	1.77815	Exposome (chemical)	7H-Benzo[c]fluorene	Gut microbiome	family_Sutterellaceae
PM1926	genus_Alistipes	1	0.0166667	1.77815	Exposome (chemical)	7H-Benzo[c]fluorene	Gut microbiome	genus_Alistipes
PM1926	genus_Clostridium.sensu.stricto	1	0.0166667	1.77815	Exposome (chemical)	7H-Benzo[c]fluorene	Gut microbiome	genus_Clostridium.sensu.stricto
PM1926	genus_Eggerthella	1	0.0166667	1.77815	Exposome (chemical)	7H-Benzo[c]fluorene	Gut microbiome	genus_Eggerthella
PM1926	genus_Odoribacter	1	0.0166667	1.77815	Exposome (chemical)	7H-Benzo[c]fluorene	Gut microbiome	genus_Odoribacter
PM1926	genus_Parasutterella	1	0.0166667	1.77815	Exposome (chemical)	7H-Benzo[c]fluorene	Gut microbiome	genus_Parasutterella
PM1926	genus_Roseburia	-1	0.0166667	1.77815	Exposome (chemical)	7H-Benzo[c]fluorene	Gut microbiome	genus_Roseburia
PM1927	class_Bacilli	-1	0.0166667	1.77815	Exposome (chemical)	Bergapten	Gut microbiome	class_Bacilli
PM1927	order_Lactobacillales	-1	0.0166667	1.77815	Exposome (chemical)	Bergapten	Gut microbiome	order_Lactobacillales
PM1927	family_Streptococcaceae	-1	0.0166667	1.77815	Exposome (chemical)	Bergapten	Gut microbiome	family_Streptococcaceae
PM1936	genus_unclassified_Coriobacteriaceae	1	0.0166667	1.77815	Exposome (chemical)	Pyracarbolid	Gut microbiome	genus_unclassified_Coriobacteriaceae
PM1956	family_Porphyromonadaceae	1	0.0166667	1.77815	Exposome (chemical)	Thidiazuron	Gut microbiome	family_Porphyromonadaceae
PM1956	family_Veillonellaceae	1	0.0166667	1.77815	Exposome (chemical)	Thidiazuron	Gut microbiome	family_Veillonellaceae
PM1956	genus_Butyricimonas	1	0.0166667	1.77815	Exposome (chemical)	Thidiazuron	Gut microbiome	genus_Butyricimonas
PM1956	genus_Veillonella	1	0.0166667	1.77815	Exposome (chemical)	Thidiazuron	Gut microbiome	genus_Veillonella
PM1971	class_Betaproteobacteria	-1	0.0166667	1.77815	Exposome (chemical)	Carbofuran	Gut microbiome	class_Betaproteobacteria
PM1971	order_Burkholderiales	-1	0.0166667	1.77815	Exposome (chemical)	Carbofuran	Gut microbiome	order_Burkholderiales
PM1971	family_Clostridiaceae.1	1	0.0166667	1.77815	Exposome (chemical)	Carbofuran	Gut microbiome	family_Clostridiaceae.1
PM1971	family_Rikenellaceae	1	0.0166667	1.77815	Exposome (chemical)	Carbofuran	Gut microbiome	family_Rikenellaceae
PM1971	family_Sutterellaceae	-1	0.0166667	1.77815	Exposome (chemical)	Carbofuran	Gut microbiome	family_Sutterellaceae
PM1971	genus_Alistipes	1	0.0166667	1.77815	Exposome (chemical)	Carbofuran	Gut microbiome	genus_Alistipes
PM1971	genus_Clostridium.sensu.stricto	1	0.0166667	1.77815	Exposome (chemical)	Carbofuran	Gut microbiome	genus_Clostridium.sensu.stricto
PM1971	genus_Eggerthella	1	0.0166667	1.77815	Exposome (chemical)	Carbofuran	Gut microbiome	genus_Eggerthella
PM1971	genus_Odoribacter	1	0.0166667	1.77815	Exposome (chemical)	Carbofuran	Gut microbiome	genus_Odoribacter
PM1971	genus_Parasutterella	1	0.0166667	1.77815	Exposome (chemical)	Carbofuran	Gut microbiome	genus_Parasutterella
PM1971	genus_Roseburia	-1	0.0166667	1.77815	Exposome (chemical)	Carbofuran	Gut microbiome	genus_Roseburia
PM1976	family_Peptostreptococcaceae	-1	0.0166667	1.77815	Exposome (chemical)	Mono-n-butyl phthalate	Gut microbiome	family_Peptostreptococcaceae
PM1976	family_unclassified_Clostridiales	1	0.0166667	1.77815	Exposome (chemical)	Mono-n-butyl phthalate	Gut microbiome	family_unclassified_Clostridiales
PM1976	genus_Clostridium.XI	-1	0.0166667	1.77815	Exposome (chemical)	Mono-n-butyl phthalate	Gut microbiome	genus_Clostridium.XI
PM1976	genus_Clostridium.XlVa	-1	0.0166667	1.77815	Exposome (chemical)	Mono-n-butyl phthalate	Gut microbiome	genus_Clostridium.XlVa
PM1976	genus_unclassified_Clostridiales	1	0.0166667	1.77815	Exposome (chemical)	Mono-n-butyl phthalate	Gut microbiome	genus_unclassified_Clostridiales
PM1977	phylum_Verrucomicrobia	1	0.0166667	1.77815	Exposome (chemical)	Mexacarbate	Gut microbiome	phylum_Verrucomicrobia
PM1977	class_Verrucomicrobiae	1	0.0166667	1.77815	Exposome (chemical)	Mexacarbate	Gut microbiome	class_Verrucomicrobiae
PM1977	order_Verrucomicrobiales	1	0.0166667	1.77815	Exposome (chemical)	Mexacarbate	Gut microbiome	order_Verrucomicrobiales
PM1977	family_Verrucomicrobiaceae	1	0.0166667	1.77815	Exposome (chemical)	Mexacarbate	Gut microbiome	family_Verrucomicrobiaceae
PM1977	genus_Akkermansia	1	0.0166667	1.77815	Exposome (chemical)	Mexacarbate	Gut microbiome	genus_Akkermansia
PM1977	genus_Oscillibacter	1	0.0166667	1.77815	Exposome (chemical)	Mexacarbate	Gut microbiome	genus_Oscillibacter
PM1977	genus_Parabacteroides	1	0.0166667	1.77815	Exposome (chemical)	Mexacarbate	Gut microbiome	genus_Parabacteroides
PM1979	class_Betaproteobacteria	-1	0.0166667	1.77815	Exposome (chemical)	Dioxacarb	Gut microbiome	class_Betaproteobacteria
PM1979	order_Burkholderiales	-1	0.0166667	1.77815	Exposome (chemical)	Dioxacarb	Gut microbiome	order_Burkholderiales
PM1979	family_Clostridiaceae.1	1	0.0166667	1.77815	Exposome (chemical)	Dioxacarb	Gut microbiome	family_Clostridiaceae.1
PM1979	family_Rikenellaceae	1	0.0166667	1.77815	Exposome (chemical)	Dioxacarb	Gut microbiome	family_Rikenellaceae
PM1979	family_Sutterellaceae	-1	0.0166667	1.77815	Exposome (chemical)	Dioxacarb	Gut microbiome	family_Sutterellaceae
PM1979	genus_Alistipes	1	0.0166667	1.77815	Exposome (chemical)	Dioxacarb	Gut microbiome	genus_Alistipes
PM1979	genus_Clostridium.sensu.stricto	1	0.0166667	1.77815	Exposome (chemical)	Dioxacarb	Gut microbiome	genus_Clostridium.sensu.stricto
PM1979	genus_Eggerthella	1	0.0166667	1.77815	Exposome (chemical)	Dioxacarb	Gut microbiome	genus_Eggerthella
PM1979	genus_Odoribacter	1	0.0166667	1.77815	Exposome (chemical)	Dioxacarb	Gut microbiome	genus_Odoribacter
PM1979	genus_Parasutterella	1	0.0166667	1.77815	Exposome (chemical)	Dioxacarb	Gut microbiome	genus_Parasutterella
PM1979	genus_Roseburia	-1	0.0166667	1.77815	Exposome (chemical)	Dioxacarb	Gut microbiome	genus_Roseburia
PM2111	family_Porphyromonadaceae	1	0.0166667	1.77815	Exposome (chemical)	1-Nitropyrene	Gut microbiome	family_Porphyromonadaceae
PM2111	family_Veillonellaceae	1	0.0166667	1.77815	Exposome (chemical)	1-Nitropyrene	Gut microbiome	family_Veillonellaceae
PM2111	genus_Butyricimonas	1	0.0166667	1.77815	Exposome (chemical)	1-Nitropyrene	Gut microbiome	genus_Butyricimonas
PM2111	genus_Veillonella	1	0.0166667	1.77815	Exposome (chemical)	1-Nitropyrene	Gut microbiome	genus_Veillonella
PM2134	genus_Faecalibacterium	-1	0.0166667	1.77815	Exposome (chemical)	Benzo[a]pyrene	Gut microbiome	genus_Faecalibacterium
PM2151	class_Bacilli	-1	0.0166667	1.77815	Exposome (chemical)	2,4,4'-Trichlorobiphenyl (PCB 28)	Gut microbiome	class_Bacilli
PM2151	order_Lactobacillales	-1	0.0166667	1.77815	Exposome (chemical)	2,4,4'-Trichlorobiphenyl (PCB 28)	Gut microbiome	order_Lactobacillales
PM2151	family_Streptococcaceae	-1	0.0166667	1.77815	Exposome (chemical)	2,4,4'-Trichlorobiphenyl (PCB 28)	Gut microbiome	family_Streptococcaceae
PM2187	genus_Faecalibacterium	-1	0.0166667	1.77815	Exposome (chemical)	Tetrachloronaphthalene	Gut microbiome	genus_Faecalibacterium
PM2198	class_Bacilli	-1	0.0166667	1.77815	Exposome (chemical)	Triisobutyl phosphate	Gut microbiome	class_Bacilli
PM2198	order_Lactobacillales	-1	0.0166667	1.77815	Exposome (chemical)	Triisobutyl phosphate	Gut microbiome	order_Lactobacillales
PM2198	family_Streptococcaceae	-1	0.0166667	1.77815	Exposome (chemical)	Triisobutyl phosphate	Gut microbiome	family_Streptococcaceae
PM2260	genus_unclassified_Coriobacteriaceae	1	0.0166667	1.77815	Exposome (chemical)	Mono(2-ethylhexyl) phthalate	Gut microbiome	genus_unclassified_Coriobacteriaceae
PM2286	class_Betaproteobacteria	-1	0.0166667	1.77815	Exposome (chemical)	Testosterone	Gut microbiome	class_Betaproteobacteria
PM2286	order_Burkholderiales	-1	0.0166667	1.77815	Exposome (chemical)	Testosterone	Gut microbiome	order_Burkholderiales
PM2286	family_Clostridiaceae.1	1	0.0166667	1.77815	Exposome (chemical)	Testosterone	Gut microbiome	family_Clostridiaceae.1
PM2286	family_Rikenellaceae	1	0.0166667	1.77815	Exposome (chemical)	Testosterone	Gut microbiome	family_Rikenellaceae
PM2286	family_Sutterellaceae	-1	0.0166667	1.77815	Exposome (chemical)	Testosterone	Gut microbiome	family_Sutterellaceae
PM2286	genus_Alistipes	1	0.0166667	1.77815	Exposome (chemical)	Testosterone	Gut microbiome	genus_Alistipes
PM2286	genus_Clostridium.sensu.stricto	1	0.0166667	1.77815	Exposome (chemical)	Testosterone	Gut microbiome	genus_Clostridium.sensu.stricto
PM2286	genus_Eggerthella	1	0.0166667	1.77815	Exposome (chemical)	Testosterone	Gut microbiome	genus_Eggerthella
PM2286	genus_Odoribacter	1	0.0166667	1.77815	Exposome (chemical)	Testosterone	Gut microbiome	genus_Odoribacter
PM2286	genus_Parasutterella	1	0.0166667	1.77815	Exposome (chemical)	Testosterone	Gut microbiome	genus_Parasutterella
PM2286	genus_Roseburia	-1	0.0166667	1.77815	Exposome (chemical)	Testosterone	Gut microbiome	genus_Roseburia
PM2296	genus_Barnesiella	-1	0.0166667	1.77815	Exposome (chemical)	Cyproconazole	Gut microbiome	genus_Barnesiella
PM2296	genus_Clostridium.IV	-1	0.0166667	1.77815	Exposome (chemical)	Cyproconazole	Gut microbiome	genus_Clostridium.IV
PM2296	genus_unclassified_Ruminococcaceae	-1	0.0166667	1.77815	Exposome (chemical)	Cyproconazole	Gut microbiome	genus_unclassified_Ruminococcaceae
PM2325	genus_unclassified_Coriobacteriaceae	1	0.0166667	1.77815	Exposome (chemical)	Dibenzo[a,l]pyrene	Gut microbiome	genus_unclassified_Coriobacteriaceae
PM2342	class_Bacilli	-1	0.0166667	1.77815	Exposome (chemical)	Butylated triphenyl phosphate	Gut microbiome	class_Bacilli
PM2342	order_Lactobacillales	-1	0.0166667	1.77815	Exposome (chemical)	Butylated triphenyl phosphate	Gut microbiome	order_Lactobacillales
PM2342	family_Streptococcaceae	-1	0.0166667	1.77815	Exposome (chemical)	Butylated triphenyl phosphate	Gut microbiome	family_Streptococcaceae
PM2383	phylum_Verrucomicrobia	1	0.0166667	1.77815	Exposome (chemical)	3,3',4,4'-Tetrachloroazobenzene	Gut microbiome	phylum_Verrucomicrobia
PM2383	class_Verrucomicrobiae	1	0.0166667	1.77815	Exposome (chemical)	3,3',4,4'-Tetrachloroazobenzene	Gut microbiome	class_Verrucomicrobiae
PM2383	order_Verrucomicrobiales	1	0.0166667	1.77815	Exposome (chemical)	3,3',4,4'-Tetrachloroazobenzene	Gut microbiome	order_Verrucomicrobiales
PM2383	family_Verrucomicrobiaceae	1	0.0166667	1.77815	Exposome (chemical)	3,3',4,4'-Tetrachloroazobenzene	Gut microbiome	family_Verrucomicrobiaceae
PM2383	genus_Akkermansia	1	0.0166667	1.77815	Exposome (chemical)	3,3',4,4'-Tetrachloroazobenzene	Gut microbiome	genus_Akkermansia
PM2383	genus_Oscillibacter	1	0.0166667	1.77815	Exposome (chemical)	3,3',4,4'-Tetrachloroazobenzene	Gut microbiome	genus_Oscillibacter
PM2383	genus_Parabacteroides	1	0.0166667	1.77815	Exposome (chemical)	3,3',4,4'-Tetrachloroazobenzene	Gut microbiome	genus_Parabacteroides
PM2532	genus_unclassified_Coriobacteriaceae	-1	0.0166667	1.77815	Exposome (chemical)	Hydrocortisone	Gut microbiome	genus_unclassified_Coriobacteriaceae
PM2540	class_Betaproteobacteria	-1	0.0166667	1.77815	Exposome (chemical)	Perfluoroheptanoic acid (PFHpA)	Gut microbiome	class_Betaproteobacteria
PM2540	order_Burkholderiales	-1	0.0166667	1.77815	Exposome (chemical)	Perfluoroheptanoic acid (PFHpA)	Gut microbiome	order_Burkholderiales
PM2540	family_Clostridiaceae.1	1	0.0166667	1.77815	Exposome (chemical)	Perfluoroheptanoic acid (PFHpA)	Gut microbiome	family_Clostridiaceae.1
PM2540	family_Rikenellaceae	1	0.0166667	1.77815	Exposome (chemical)	Perfluoroheptanoic acid (PFHpA)	Gut microbiome	family_Rikenellaceae
PM2540	family_Sutterellaceae	-1	0.0166667	1.77815	Exposome (chemical)	Perfluoroheptanoic acid (PFHpA)	Gut microbiome	family_Sutterellaceae
PM2540	genus_Alistipes	1	0.0166667	1.77815	Exposome (chemical)	Perfluoroheptanoic acid (PFHpA)	Gut microbiome	genus_Alistipes
PM2540	genus_Clostridium.sensu.stricto	1	0.0166667	1.77815	Exposome (chemical)	Perfluoroheptanoic acid (PFHpA)	Gut microbiome	genus_Clostridium.sensu.stricto
PM2540	genus_Eggerthella	1	0.0166667	1.77815	Exposome (chemical)	Perfluoroheptanoic acid (PFHpA)	Gut microbiome	genus_Eggerthella
PM2540	genus_Odoribacter	1	0.0166667	1.77815	Exposome (chemical)	Perfluoroheptanoic acid (PFHpA)	Gut microbiome	genus_Odoribacter
PM2540	genus_Parasutterella	1	0.0166667	1.77815	Exposome (chemical)	Perfluoroheptanoic acid (PFHpA)	Gut microbiome	genus_Parasutterella
PM2540	genus_Roseburia	-1	0.0166667	1.77815	Exposome (chemical)	Perfluoroheptanoic acid (PFHpA)	Gut microbiome	genus_Roseburia
PM2549	genus_unclassified_Coriobacteriaceae	1	0.0166667	1.77815	Exposome (chemical)	Tricresyl phosphate	Gut microbiome	genus_unclassified_Coriobacteriaceae
PM2644	class_unclassified_Firmicutes	1	0.0166667	1.77815	Exposome (chemical)	Bis(2-ethylhexyl) phthalate	Gut microbiome	class_unclassified_Firmicutes
PM2644	order_unclassified_Firmicutes	1	0.0166667	1.77815	Exposome (chemical)	Bis(2-ethylhexyl) phthalate	Gut microbiome	order_unclassified_Firmicutes
PM2644	family_unclassified_Firmicutes	1	0.0166667	1.77815	Exposome (chemical)	Bis(2-ethylhexyl) phthalate	Gut microbiome	family_unclassified_Firmicutes
PM2644	genus_unclassified_Firmicutes	1	0.0166667	1.77815	Exposome (chemical)	Bis(2-ethylhexyl) phthalate	Gut microbiome	genus_unclassified_Firmicutes
PM2688	class_unclassified_Firmicutes	1	0.0166667	1.77815	Exposome (chemical)	Perfluorohexanesulfonic acid (PFHxS)	Gut microbiome	class_unclassified_Firmicutes
PM2688	order_unclassified_Firmicutes	1	0.0166667	1.77815	Exposome (chemical)	Perfluorohexanesulfonic acid (PFHxS)	Gut microbiome	order_unclassified_Firmicutes
PM2688	family_unclassified_Firmicutes	1	0.0166667	1.77815	Exposome (chemical)	Perfluorohexanesulfonic acid (PFHxS)	Gut microbiome	family_unclassified_Firmicutes
PM2688	genus_unclassified_Firmicutes	1	0.0166667	1.77815	Exposome (chemical)	Perfluorohexanesulfonic acid (PFHxS)	Gut microbiome	genus_unclassified_Firmicutes
PM2850	class_Betaproteobacteria	-1	0.0166667	1.77815	Exposome (chemical)	Tris(4-isopropylphenyl) phosphate	Gut microbiome	class_Betaproteobacteria
PM2850	order_Burkholderiales	-1	0.0166667	1.77815	Exposome (chemical)	Tris(4-isopropylphenyl) phosphate	Gut microbiome	order_Burkholderiales
PM2850	family_Clostridiaceae.1	1	0.0166667	1.77815	Exposome (chemical)	Tris(4-isopropylphenyl) phosphate	Gut microbiome	family_Clostridiaceae.1
PM2850	family_Rikenellaceae	1	0.0166667	1.77815	Exposome (chemical)	Tris(4-isopropylphenyl) phosphate	Gut microbiome	family_Rikenellaceae
PM2850	family_Sutterellaceae	-1	0.0166667	1.77815	Exposome (chemical)	Tris(4-isopropylphenyl) phosphate	Gut microbiome	family_Sutterellaceae
PM2850	genus_Alistipes	1	0.0166667	1.77815	Exposome (chemical)	Tris(4-isopropylphenyl) phosphate	Gut microbiome	genus_Alistipes
PM2850	genus_Clostridium.sensu.stricto	1	0.0166667	1.77815	Exposome (chemical)	Tris(4-isopropylphenyl) phosphate	Gut microbiome	genus_Clostridium.sensu.stricto
PM2850	genus_Eggerthella	1	0.0166667	1.77815	Exposome (chemical)	Tris(4-isopropylphenyl) phosphate	Gut microbiome	genus_Eggerthella
PM2850	genus_Odoribacter	1	0.0166667	1.77815	Exposome (chemical)	Tris(4-isopropylphenyl) phosphate	Gut microbiome	genus_Odoribacter
PM2850	genus_Parasutterella	1	0.0166667	1.77815	Exposome (chemical)	Tris(4-isopropylphenyl) phosphate	Gut microbiome	genus_Parasutterella
PM2850	genus_Roseburia	-1	0.0166667	1.77815	Exposome (chemical)	Tris(4-isopropylphenyl) phosphate	Gut microbiome	genus_Roseburia
PM2871	family_Peptostreptococcaceae	1	0.0166667	1.77815	Exposome (chemical)	Perfluorononanoic acid (PFNA)	Gut microbiome	family_Peptostreptococcaceae
PM2871	family_unclassified_Clostridiales	-1	0.0166667	1.77815	Exposome (chemical)	Perfluorononanoic acid (PFNA)	Gut microbiome	family_unclassified_Clostridiales
PM2871	genus_Clostridium.XI	1	0.0166667	1.77815	Exposome (chemical)	Perfluorononanoic acid (PFNA)	Gut microbiome	genus_Clostridium.XI
PM2871	genus_Clostridium.XlVa	1	0.0166667	1.77815	Exposome (chemical)	Perfluorononanoic acid (PFNA)	Gut microbiome	genus_Clostridium.XlVa
PM2871	genus_unclassified_Clostridiales	-1	0.0166667	1.77815	Exposome (chemical)	Perfluorononanoic acid (PFNA)	Gut microbiome	genus_unclassified_Clostridiales
NM1254	pHILIC_137.0457_3.1	-0.974679	0.00481823	2.31711	Exposome (chemical)	Salicylic acid	Metabolome	Hypoxanthine
NM1254	pHILIC_104.0705_8.1	0.974679	0.00481823	2.31711	Exposome (chemical)	Salicylic acid	Metabolome	2-Aminobutyrate
NM1254	pHILIC_146.1175_11	0.974679	0.00481823	2.31711	Exposome (chemical)	Salicylic acid	Metabolome	Acetylcholine
NM1254	pHILIC_276.1548_13.2	0.974679	0.00481823	2.31711	Exposome (chemical)	Salicylic acid	Metabolome	gamma-glutamyl-epsilon-lysine
NM1254	nHILIC_303.2327_1	-0.974679	0.00481823	2.31711	Exposome (chemical)	Salicylic acid	Metabolome	C20:4 FA
NM1254	nHILIC_230.0127_2.1	0.974679	0.00481823	2.31711	Exposome (chemical)	Salicylic acid	Metabolome	C8H9NO5S
NM1254	nHILIC_181.0367_6.8	-0.974679	0.00481823	2.31711	Exposome (chemical)	Salicylic acid	Metabolome	1-Methyluric acid
NM1254	nHILIC_132.0302_8.3	0.974679	0.00481823	2.31711	Exposome (chemical)	Salicylic acid	Metabolome	Iminodiacetate (IDA)
NM1254	nHILIC_183.0294_2.1	-0.974679	0.00481823	2.31711	Exposome (chemical)	Salicylic acid	Metabolome	C8H8O5
NM1254	nHILIC_281.089_2.2	0.974679	0.00481823	2.31711	Exposome (chemical)	Salicylic acid	Metabolome	C11H14N4O5
NM1254	nHILIC_165.0404_7.8	0.974679	0.00481823	2.31711	Exposome (chemical)	Salicylic acid	Metabolome	Arabonate | Xylonate(3)
NM1254	nHILIC_287.052_8.1	0.974679	0.00481823	2.31711	Exposome (chemical)	Salicylic acid	Metabolome	Orotidine
NM1254	nHILIC_349.0752_8.5	-0.974679	0.00481823	2.31711	Exposome (chemical)	Salicylic acid	Metabolome	C13H18O11
NM1254	nHILIC_275.0649_8.9	0.974679	0.00481823	2.31711	Exposome (chemical)	Salicylic acid	Metabolome	Unknown_nHILIC_275.0649_8.9
NM1254	nHILIC_485.1492_3.9	-0.974679	0.00481823	2.31711	Exposome (chemical)	Salicylic acid	Metabolome	C18H29O15
NM1254	nHILIC_257.0777_2.2	0.974679	0.00481823	2.31711	Exposome (chemical)	Salicylic acid	Metabolome	5-methyluridine (ribothymidine)
NM1254	nHILIC_137.0243_1	-0.974679	0.00481823	2.31711	Exposome (chemical)	Salicylic acid	Metabolome	Hydroxybenzoic acid
NM1254	pRPLC_195.0875_4.6	-0.974679	0.00481823	2.31711	Exposome (chemical)	Salicylic acid	Metabolome	Caffeine
NM1254	pRPLC_302.2328_5.6	0.974679	0.00481823	2.31711	Exposome (chemical)	Salicylic acid	Metabolome	C9:0 AC
NM1254	pRPLC_505.2774_9.3	-0.974679	0.00481823	2.31711	Exposome (chemical)	Salicylic acid	Metabolome	C24H36N6O6
NM1254	nRPLC_213.1497_8.1	0.974679	0.00481823	2.31711	Exposome (chemical)	Salicylic acid	Metabolome	"C12:1,OH FA"
NM1254	nRPLC_229.1445_7.4	-0.974679	0.00481823	2.31711	Exposome (chemical)	Salicylic acid	Metabolome	"C12:0,DC FA"
NM1254	nRPLC_165.0418_1.9	-0.974679	0.00481823	2.31711	Exposome (chemical)	Salicylic acid	Metabolome	1-Methylxanthine
NM1254	nRPLC_169.1234_8	0.974679	0.00481823	2.31711	Exposome (chemical)	Salicylic acid	Metabolome	C10:1 FA(1)
NM1254	nRPLC_215.1653_8.4	0.974679	0.00481823	2.31711	Exposome (chemical)	Salicylic acid	Metabolome	"C12:0,OH FA(1)"
NM1254	nRPLC_281.1394_9	0.974679	0.00481823	2.31711	Exposome (chemical)	Salicylic acid	Metabolome	C15H22O5
NM1254	nRPLC_409.3322_11.2	-0.974679	0.00481823	2.31711	Exposome (chemical)	Salicylic acid	Metabolome	MG(22:2)
NM1254	nRPLC_489.3582_11	-0.974679	0.00481823	2.31711	Exposome (chemical)	Salicylic acid	Metabolome	C30H50O5(1)
NM1254	nRPLC_507.3686_10.6	-0.974679	0.00481823	2.31711	Exposome (chemical)	Salicylic acid	Metabolome	C30H52O6
NM1254	nRPLC_453.3221_10.1	-0.974679	0.00481823	2.31711	Exposome (chemical)	Salicylic acid	Metabolome	C26H46O6(1)
NM1254	nRPLC_295.2278_9.9	0.974679	0.00481823	2.31711	Exposome (chemical)	Salicylic acid	Metabolome	"C18:2,OH FA"
NM1254	nRPLC_315.2541_9.4	0.974679	0.00481823	2.31711	Exposome (chemical)	Salicylic acid	Metabolome	MG(15:0)(1)
NM1254	nRPLC_267.1966_9.2	0.974679	0.00481823	2.31711	Exposome (chemical)	Salicylic acid	Metabolome	"C16:2,OH FA"
NM1254	nRPLC_239.1653_8.5	0.974679	0.00481823	2.31711	Exposome (chemical)	Salicylic acid	Metabolome	"C14:2,OH FA"
NM1254	nRPLC_267.1238_8.3	0.974679	0.00481823	2.31711	Exposome (chemical)	Salicylic acid	Metabolome	C14H20O5
NM1254	nRPLC_209.1184_8.2	0.974679	0.00481823	2.31711	Exposome (chemical)	Salicylic acid	Metabolome	C12H18O3(2)
NM1254	nRPLC_213.1498_7.8	0.974679	0.00481823	2.31711	Exposome (chemical)	Salicylic acid	Metabolome	"C12:1, OH FA"
NM1254	nRPLC_187.1339_7.1	0.974679	0.00481823	2.31711	Exposome (chemical)	Salicylic acid	Metabolome	"C10:0,OH FA(1)"
NM1254	nRPLC_411.127_3.6	0.974679	0.00481823	2.31711	Exposome (chemical)	Salicylic acid	Metabolome	N6-Carbamoyl-L-threonyladenosine
NM1254	nRPLC_203.002_1.9	0.974679	0.00481823	2.31711	Exposome (chemical)	Salicylic acid	Metabolome	4-Methylcatechol sulfate
NM1446	pHILIC_137.0457_3.1	1	0.0166667	1.77815	Exposome (chemical)	Trimethyl Phosphate	Metabolome	Hypoxanthine
NM1446	pHILIC_104.0705_8.1	-1	0.0166667	1.77815	Exposome (chemical)	Trimethyl Phosphate	Metabolome	2-Aminobutyrate
NM1446	pHILIC_146.1175_11	-1	0.0166667	1.77815	Exposome (chemical)	Trimethyl Phosphate	Metabolome	Acetylcholine
NM1446	nHILIC_303.2327_1	1	0.0166667	1.77815	Exposome (chemical)	Trimethyl Phosphate	Metabolome	C20:4 FA
NM1446	nHILIC_230.0127_2.1	-1	0.0166667	1.77815	Exposome (chemical)	Trimethyl Phosphate	Metabolome	C8H9NO5S
NM1446	nHILIC_181.0367_6.8	1	0.0166667	1.77815	Exposome (chemical)	Trimethyl Phosphate	Metabolome	1-Methyluric acid
NM1446	nHILIC_132.0302_8.3	-1	0.0166667	1.77815	Exposome (chemical)	Trimethyl Phosphate	Metabolome	Iminodiacetate (IDA)
NM1446	nHILIC_183.0294_2.1	1	0.0166667	1.77815	Exposome (chemical)	Trimethyl Phosphate	Metabolome	C8H8O5
NM1446	nHILIC_281.089_2.2	-1	0.0166667	1.77815	Exposome (chemical)	Trimethyl Phosphate	Metabolome	C11H14N4O5
NM1446	nHILIC_165.0404_7.8	-1	0.0166667	1.77815	Exposome (chemical)	Trimethyl Phosphate	Metabolome	Arabonate | Xylonate(3)
NM1446	nHILIC_287.052_8.1	-1	0.0166667	1.77815	Exposome (chemical)	Trimethyl Phosphate	Metabolome	Orotidine
NM1446	nHILIC_349.0752_8.5	1	0.0166667	1.77815	Exposome (chemical)	Trimethyl Phosphate	Metabolome	C13H18O11
NM1446	nHILIC_275.0649_8.9	-1	0.0166667	1.77815	Exposome (chemical)	Trimethyl Phosphate	Metabolome	Unknown_nHILIC_275.0649_8.9
NM1446	nHILIC_257.0777_2.2	-1	0.0166667	1.77815	Exposome (chemical)	Trimethyl Phosphate	Metabolome	5-methyluridine (ribothymidine)
NM1446	nHILIC_137.0243_1	1	0.0166667	1.77815	Exposome (chemical)	Trimethyl Phosphate	Metabolome	Hydroxybenzoic acid
NM1446	pRPLC_195.0875_4.6	1	0.0166667	1.77815	Exposome (chemical)	Trimethyl Phosphate	Metabolome	Caffeine
NM1446	pRPLC_302.2328_5.6	-1	0.0166667	1.77815	Exposome (chemical)	Trimethyl Phosphate	Metabolome	C9:0 AC
NM1446	pRPLC_505.2774_9.3	1	0.0166667	1.77815	Exposome (chemical)	Trimethyl Phosphate	Metabolome	C24H36N6O6
NM1446	nRPLC_213.1497_8.1	-1	0.0166667	1.77815	Exposome (chemical)	Trimethyl Phosphate	Metabolome	"C12:1,OH FA"
NM1446	nRPLC_229.1445_7.4	1	0.0166667	1.77815	Exposome (chemical)	Trimethyl Phosphate	Metabolome	"C12:0,DC FA"
NM1446	nRPLC_165.0418_1.9	1	0.0166667	1.77815	Exposome (chemical)	Trimethyl Phosphate	Metabolome	1-Methylxanthine
NM1446	nRPLC_169.1234_8	-1	0.0166667	1.77815	Exposome (chemical)	Trimethyl Phosphate	Metabolome	C10:1 FA(1)
NM1446	nRPLC_215.1653_8.4	-1	0.0166667	1.77815	Exposome (chemical)	Trimethyl Phosphate	Metabolome	"C12:0,OH FA(1)"
NM1446	nRPLC_281.1394_9	-1	0.0166667	1.77815	Exposome (chemical)	Trimethyl Phosphate	Metabolome	C15H22O5
NM1446	nRPLC_409.3322_11.2	1	0.0166667	1.77815	Exposome (chemical)	Trimethyl Phosphate	Metabolome	MG(22:2)
NM1446	nRPLC_489.3582_11	1	0.0166667	1.77815	Exposome (chemical)	Trimethyl Phosphate	Metabolome	C30H50O5(1)
NM1446	nRPLC_507.3686_10.6	1	0.0166667	1.77815	Exposome (chemical)	Trimethyl Phosphate	Metabolome	C30H52O6
NM1446	nRPLC_453.3221_10.1	1	0.0166667	1.77815	Exposome (chemical)	Trimethyl Phosphate	Metabolome	C26H46O6(1)
NM1446	nRPLC_295.2278_9.9	-1	0.0166667	1.77815	Exposome (chemical)	Trimethyl Phosphate	Metabolome	"C18:2,OH FA"
NM1446	nRPLC_315.2541_9.4	-1	0.0166667	1.77815	Exposome (chemical)	Trimethyl Phosphate	Metabolome	MG(15:0)(1)
NM1446	nRPLC_239.1653_8.5	-1	0.0166667	1.77815	Exposome (chemical)	Trimethyl Phosphate	Metabolome	"C14:2,OH FA"
NM1446	nRPLC_267.1238_8.3	-1	0.0166667	1.77815	Exposome (chemical)	Trimethyl Phosphate	Metabolome	C14H20O5
NM1446	nRPLC_209.1184_8.2	-1	0.0166667	1.77815	Exposome (chemical)	Trimethyl Phosphate	Metabolome	C12H18O3(2)
NM1446	nRPLC_213.1498_7.8	-1	0.0166667	1.77815	Exposome (chemical)	Trimethyl Phosphate	Metabolome	"C12:1, OH FA"
NM1446	nRPLC_187.1339_7.1	-1	0.0166667	1.77815	Exposome (chemical)	Trimethyl Phosphate	Metabolome	"C10:0,OH FA(1)"
NM1446	nRPLC_203.002_1.9	-1	0.0166667	1.77815	Exposome (chemical)	Trimethyl Phosphate	Metabolome	4-Methylcatechol sulfate
NM1550	pHILIC_200.128_6.8	1	0.0166667	1.77815	Exposome (chemical)	4-Chloro-o-toluidine	Metabolome	C10H17NO3
NM1550	nHILIC_267.0719_4.2	-1	0.0166667	1.77815	Exposome (chemical)	4-Chloro-o-toluidine	Metabolome	C10H12N4O5
NM1550	nHILIC_335.0495_8.3	1	0.0166667	1.77815	Exposome (chemical)	4-Chloro-o-toluidine	Metabolome	Uric acid
NM1550	nHILIC_459.1407_2.1	1	0.0166667	1.77815	Exposome (chemical)	4-Chloro-o-toluidine	Metabolome	C22H24N2O9
NM1550	nHILIC_87.045_4.2	1	0.0166667	1.77815	Exposome (chemical)	4-Chloro-o-toluidine	Metabolome	Butyric acid|Isobutyric acid
NM1550	nHILIC_129.0192_7.6	-1	0.0166667	1.77815	Exposome (chemical)	4-Chloro-o-toluidine	Metabolome	C5H6O4
NM1550	nHILIC_116.0352_7.5	1	0.0166667	1.77815	Exposome (chemical)	4-Chloro-o-toluidine	Metabolome	C4H7NO3
NM1550	nHILIC_160.0615_7.2	1	0.0166667	1.77815	Exposome (chemical)	4-Chloro-o-toluidine	Metabolome	N-acetylthreonine
NM1550	nHILIC_539.2489_6.5	1	0.0166667	1.77815	Exposome (chemical)	4-Chloro-o-toluidine	Metabolome	C27H40O11
NM1550	nHILIC_89.0243_5.8	-1	0.0166667	1.77815	Exposome (chemical)	4-Chloro-o-toluidine	Metabolome	L-Lactic acid
NM1550	pRPLC_246.17_1.9	1	0.0166667	1.77815	Exposome (chemical)	4-Chloro-o-toluidine	Metabolome	C5:0 AC
NM1550	pRPLC_357.2788_9.5	1	0.0166667	1.77815	Exposome (chemical)	4-Chloro-o-toluidine	Metabolome	C24H38O3(2)
NM1550	nRPLC_230.9968_4.1	-1	0.0166667	1.77815	Exposome (chemical)	4-Chloro-o-toluidine	Metabolome	methyl-4-hydroxybenzoate sulfate
NM1550	nRPLC_391.2856_9.5	1	0.0166667	1.77815	Exposome (chemical)	4-Chloro-o-toluidine	Metabolome	Chenodeoxycholic Acid(2)
NM1550	nRPLC_431.3166_10.4	1	0.0166667	1.77815	Exposome (chemical)	4-Chloro-o-toluidine	Metabolome	C27H44O4(2)
NM1550	nRPLC_243.1601_8.2	1	0.0166667	1.77815	Exposome (chemical)	4-Chloro-o-toluidine	Metabolome	"C13:0,DC FA(3)"
NM1550	nRPLC_247.1703_9.4	1	0.0166667	1.77815	Exposome (chemical)	4-Chloro-o-toluidine	Metabolome	C16:4 FA
NM1550	nRPLC_397.2054_9.6	1	0.0166667	1.77815	Exposome (chemical)	4-Chloro-o-toluidine	Metabolome	Pregnanolone sulfate
NM1550	nRPLC_297.1343_8.3	1	0.0166667	1.77815	Exposome (chemical)	4-Chloro-o-toluidine	Metabolome	C15H22O6(3)
NM1550	nRPLC_577.255_7	-1	0.0166667	1.77815	Exposome (chemical)	4-Chloro-o-toluidine	Metabolome	C32H38N2O8
NM2680	pHILIC_137.0457_3.1	1	0.0166667	1.77815	Exposome (chemical)	Tetrachloroethylene	Metabolome	Hypoxanthine
NM2680	pHILIC_104.0705_8.1	-1	0.0166667	1.77815	Exposome (chemical)	Tetrachloroethylene	Metabolome	2-Aminobutyrate
NM2680	pHILIC_146.1175_11	-1	0.0166667	1.77815	Exposome (chemical)	Tetrachloroethylene	Metabolome	Acetylcholine
NM2680	nHILIC_303.2327_1	1	0.0166667	1.77815	Exposome (chemical)	Tetrachloroethylene	Metabolome	C20:4 FA
NM2680	nHILIC_230.0127_2.1	-1	0.0166667	1.77815	Exposome (chemical)	Tetrachloroethylene	Metabolome	C8H9NO5S
NM2680	nHILIC_181.0367_6.8	1	0.0166667	1.77815	Exposome (chemical)	Tetrachloroethylene	Metabolome	1-Methyluric acid
NM2680	nHILIC_132.0302_8.3	-1	0.0166667	1.77815	Exposome (chemical)	Tetrachloroethylene	Metabolome	Iminodiacetate (IDA)
NM2680	nHILIC_183.0294_2.1	1	0.0166667	1.77815	Exposome (chemical)	Tetrachloroethylene	Metabolome	C8H8O5
NM2680	nHILIC_281.089_2.2	-1	0.0166667	1.77815	Exposome (chemical)	Tetrachloroethylene	Metabolome	C11H14N4O5
NM2680	nHILIC_165.0404_7.8	-1	0.0166667	1.77815	Exposome (chemical)	Tetrachloroethylene	Metabolome	Arabonate | Xylonate(3)
NM2680	nHILIC_287.052_8.1	-1	0.0166667	1.77815	Exposome (chemical)	Tetrachloroethylene	Metabolome	Orotidine
NM2680	nHILIC_349.0752_8.5	1	0.0166667	1.77815	Exposome (chemical)	Tetrachloroethylene	Metabolome	C13H18O11
NM2680	nHILIC_275.0649_8.9	-1	0.0166667	1.77815	Exposome (chemical)	Tetrachloroethylene	Metabolome	Unknown_nHILIC_275.0649_8.9
NM2680	nHILIC_257.0777_2.2	-1	0.0166667	1.77815	Exposome (chemical)	Tetrachloroethylene	Metabolome	5-methyluridine (ribothymidine)
NM2680	nHILIC_137.0243_1	1	0.0166667	1.77815	Exposome (chemical)	Tetrachloroethylene	Metabolome	Hydroxybenzoic acid
NM2680	pRPLC_195.0875_4.6	1	0.0166667	1.77815	Exposome (chemical)	Tetrachloroethylene	Metabolome	Caffeine
NM2680	pRPLC_302.2328_5.6	-1	0.0166667	1.77815	Exposome (chemical)	Tetrachloroethylene	Metabolome	C9:0 AC
NM2680	pRPLC_505.2774_9.3	1	0.0166667	1.77815	Exposome (chemical)	Tetrachloroethylene	Metabolome	C24H36N6O6
NM2680	nRPLC_213.1497_8.1	-1	0.0166667	1.77815	Exposome (chemical)	Tetrachloroethylene	Metabolome	"C12:1,OH FA"
NM2680	nRPLC_229.1445_7.4	1	0.0166667	1.77815	Exposome (chemical)	Tetrachloroethylene	Metabolome	"C12:0,DC FA"
NM2680	nRPLC_165.0418_1.9	1	0.0166667	1.77815	Exposome (chemical)	Tetrachloroethylene	Metabolome	1-Methylxanthine
NM2680	nRPLC_169.1234_8	-1	0.0166667	1.77815	Exposome (chemical)	Tetrachloroethylene	Metabolome	C10:1 FA(1)
NM2680	nRPLC_215.1653_8.4	-1	0.0166667	1.77815	Exposome (chemical)	Tetrachloroethylene	Metabolome	"C12:0,OH FA(1)"
NM2680	nRPLC_281.1394_9	-1	0.0166667	1.77815	Exposome (chemical)	Tetrachloroethylene	Metabolome	C15H22O5
NM2680	nRPLC_409.3322_11.2	1	0.0166667	1.77815	Exposome (chemical)	Tetrachloroethylene	Metabolome	MG(22:2)
NM2680	nRPLC_489.3582_11	1	0.0166667	1.77815	Exposome (chemical)	Tetrachloroethylene	Metabolome	C30H50O5(1)
NM2680	nRPLC_507.3686_10.6	1	0.0166667	1.77815	Exposome (chemical)	Tetrachloroethylene	Metabolome	C30H52O6
NM2680	nRPLC_453.3221_10.1	1	0.0166667	1.77815	Exposome (chemical)	Tetrachloroethylene	Metabolome	C26H46O6(1)
NM2680	nRPLC_295.2278_9.9	-1	0.0166667	1.77815	Exposome (chemical)	Tetrachloroethylene	Metabolome	"C18:2,OH FA"
NM2680	nRPLC_315.2541_9.4	-1	0.0166667	1.77815	Exposome (chemical)	Tetrachloroethylene	Metabolome	MG(15:0)(1)
NM2680	nRPLC_239.1653_8.5	-1	0.0166667	1.77815	Exposome (chemical)	Tetrachloroethylene	Metabolome	"C14:2,OH FA"
NM2680	nRPLC_267.1238_8.3	-1	0.0166667	1.77815	Exposome (chemical)	Tetrachloroethylene	Metabolome	C14H20O5
NM2680	nRPLC_209.1184_8.2	-1	0.0166667	1.77815	Exposome (chemical)	Tetrachloroethylene	Metabolome	C12H18O3(2)
NM2680	nRPLC_213.1498_7.8	-1	0.0166667	1.77815	Exposome (chemical)	Tetrachloroethylene	Metabolome	"C12:1, OH FA"
NM2680	nRPLC_187.1339_7.1	-1	0.0166667	1.77815	Exposome (chemical)	Tetrachloroethylene	Metabolome	"C10:0,OH FA(1)"
NM2680	nRPLC_203.002_1.9	-1	0.0166667	1.77815	Exposome (chemical)	Tetrachloroethylene	Metabolome	4-Methylcatechol sulfate
NM3057	pHILIC_257.1127_2	1	0.0166667	1.77815	Exposome (chemical)	Acephate	Metabolome	C11H16N2O5
NM3057	pHILIC_360.2736_6.1	1	0.0166667	1.77815	Exposome (chemical)	Acephate	Metabolome	"C18:0,OH AC"
NM3057	nHILIC_194.0458_6.9	-1	0.0166667	1.77815	Exposome (chemical)	Acephate	Metabolome	Hydroxyhippurate(2)
NM3057	nHILIC_238.0929_7.3	-1	0.0166667	1.77815	Exposome (chemical)	Acephate	Metabolome	ethyl glucuronide
NM3057	nHILIC_280.0754_8.9	1	0.0166667	1.77815	Exposome (chemical)	Acephate	Metabolome	Unknown_nHILIC_280.0754_8.9 related to nHILIC_275.0649_8.9
NM3057	nHILIC_194.0458_4.6	-1	0.0166667	1.77815	Exposome (chemical)	Acephate	Metabolome	Hydroxyhippurate(3)
NM3057	nHILIC_204.9811_1.1	-1	0.0166667	1.77815	Exposome (chemical)	Acephate	Metabolome	"1,2,3-benzenetriol sulfate"
NM3057	pRPLC_269.1385_8	1	0.0166667	1.77815	Exposome (chemical)	Acephate	Metabolome	C14H20O5(2)_pos
NM3057	nRPLC_187.134_7.5	1	0.0166667	1.77815	Exposome (chemical)	Acephate	Metabolome	"C10:0,OH FA(2)"
NM3057	nRPLC_513.27_8.6	-1	0.0166667	1.77815	Exposome (chemical)	Acephate	Metabolome	C26H42O10
NM3057	nRPLC_165.0557_3.2	-1	0.0166667	1.77815	Exposome (chemical)	Acephate	Metabolome	Dihydro-3-coumaric acid
NM3057	nRPLC_159.1026_5.1	1	0.0166667	1.77815	Exposome (chemical)	Acephate	Metabolome	"C8:0,OH FA(1)"
NM3057	nRPLC_499.2911_8.7	-1	0.0166667	1.77815	Exposome (chemical)	Acephate	Metabolome	C26H44O9
NM3057	nRPLC_293.2122_9.9	1	0.0166667	1.77815	Exposome (chemical)	Acephate	Metabolome	"C18:3,OH FA(1)"
NM3057	nRPLC_467.2649_8.8	1	0.0166667	1.77815	Exposome (chemical)	Acephate	Metabolome	"5alpha-Androstan-3alpha,17beta-diol 17-glucuronide(2)"
NM3853	pHILIC_750.5399_3.1	1	0.0166667	1.77815	Exposome (chemical)	Dinoseb	Metabolome	PE(P-38:5)(2)
NM3853	pHILIC_221.0917_6.6	-1	0.0166667	1.77815	Exposome (chemical)	Dinoseb	Metabolome	C11H12N2O3(2)
NM3853	pHILIC_171.0763_7.5	1	0.0166667	1.77815	Exposome (chemical)	Dinoseb	Metabolome	C7H10N2O3
NM3853	pHILIC_147.0763_9.7	1	0.0166667	1.77815	Exposome (chemical)	Dinoseb	Metabolome	L-Glutamine
NM3853	pHILIC_249.1077_10.8	1	0.0166667	1.77815	Exposome (chemical)	Dinoseb	Metabolome	gamma-glutamylthreonine(2)
NM3853	pHILIC_203.1501_13.6	1	0.0166667	1.77815	Exposome (chemical)	Dinoseb	Metabolome	Symmetric dimethylarginine
NM3853	pHILIC_175.1188_15.1	1	0.0166667	1.77815	Exposome (chemical)	Dinoseb	Metabolome	L-Arginine
NM3853	pHILIC_309.1649_15.6	-1	0.0166667	1.77815	Exposome (chemical)	Dinoseb	Metabolome	Fructoselysine
NM3853	nHILIC_243.0509_8.1	-1	0.0166667	1.77815	Exposome (chemical)	Dinoseb	Metabolome	C10H12O7
NM3853	nHILIC_135.0299_7.9	1	0.0166667	1.77815	Exposome (chemical)	Dinoseb	Metabolome	Threonic acid
NM3853	nHILIC_165.0405_8.5	1	0.0166667	1.77815	Exposome (chemical)	Dinoseb	Metabolome	Arabonate | Xylonate(1)
NM3853	nHILIC_296.0378_11	1	0.0166667	1.77815	Exposome (chemical)	Dinoseb	Metabolome	L-Cysteinylglycine disulfide
NM3853	nHILIC_146.0276_5.1	1	0.0166667	1.77815	Exposome (chemical)	Dinoseb	Metabolome	C8H5NO2
NM3853	nHILIC_133.0506_2.3	1	0.0166667	1.77815	Exposome (chemical)	Dinoseb	Metabolome	"2,3-Dihydroxyvaleric acid(2)"
NM3853	nHILIC_179.0348_2.2	1	0.0166667	1.77815	Exposome (chemical)	Dinoseb	Metabolome	4-Hydroxyphenylpyruvic acid
NM3853	pRPLC_260.1858_3.3	1	0.0166667	1.77815	Exposome (chemical)	Dinoseb	Metabolome	C6:0 AC
NM3853	pRPLC_413.207_4.8	1	0.0166667	1.77815	Exposome (chemical)	Dinoseb	Metabolome	C23H28N2O5
NM3853	pRPLC_316.2484_6.6	1	0.0166667	1.77815	Exposome (chemical)	Dinoseb	Metabolome	C10:0 AC
NM3853	pRPLC_227.0914_6.8	1	0.0166667	1.77815	Exposome (chemical)	Dinoseb	Metabolome	C11H14O5
NM3853	pRPLC_464.1915_7	-1	0.0166667	1.77815	Exposome (chemical)	Dinoseb	Metabolome	C23H29NO9
NM3853	pRPLC_342.2639_7.2	1	0.0166667	1.77815	Exposome (chemical)	Dinoseb	Metabolome	C12:1 AC
NM3853	pRPLC_239.1642_8.9	1	0.0166667	1.77815	Exposome (chemical)	Dinoseb	Metabolome	C14H22O3
NM3853	nRPLC_171.1027_5.6	-1	0.0166667	1.77815	Exposome (chemical)	Dinoseb	Metabolome	"C9:1,OH FA"
NM3853	nRPLC_333.2073_7.6	-1	0.0166667	1.77815	Exposome (chemical)	Dinoseb	Metabolome	"C20:4,DC FA"
NM3853	nRPLC_131.0714_1.6	1	0.0166667	1.77815	Exposome (chemical)	Dinoseb	Metabolome	(S)-(-)-2-Hydroxyisocaproic acid
NM3853	nRPLC_169.1233_8.2	1	0.0166667	1.77815	Exposome (chemical)	Dinoseb	Metabolome	C10:1 FA(2)
NM3853	nRPLC_243.1964_9.6	1	0.0166667	1.77815	Exposome (chemical)	Dinoseb	Metabolome	"C14:0,OH FA(2)"
NM3853	nRPLC_319.2278_9.8	1	0.0166667	1.77815	Exposome (chemical)	Dinoseb	Metabolome	"C20:4,OH FA(2)"
NM3853	nRPLC_445.3324_11.4	1	0.0166667	1.77815	Exposome (chemical)	Dinoseb	Metabolome	C28H46O4(2)
NM3853	nRPLC_199.1704_9.5	-1	0.0166667	1.77815	Exposome (chemical)	Dinoseb	Metabolome	C12:0 FA(1)
NM3853	nRPLC_448.3069_9.4	-1	0.0166667	1.77815	Exposome (chemical)	Dinoseb	Metabolome	Chenodeoxycholic acid glycine conjugate(1)
NM3853	nRPLC_223.1704_9.4	1	0.0166667	1.77815	Exposome (chemical)	Dinoseb	Metabolome	C14:2 FA
NM3853	nRPLC_243.1965_9.3	1	0.0166667	1.77815	Exposome (chemical)	Dinoseb	Metabolome	"C14:0,OH FA(1)"
NM3853	nRPLC_241.181_9	1	0.0166667	1.77815	Exposome (chemical)	Dinoseb	Metabolome	"C14:1,OH FA(1)"
NM3853	nRPLC_197.1547_9	1	0.0166667	1.77815	Exposome (chemical)	Dinoseb	Metabolome	C12:1 FA(2)
NM3853	nRPLC_514.2853_8.8	-1	0.0166667	1.77815	Exposome (chemical)	Dinoseb	Metabolome	Taurocholic acid(2)
NM3853	nRPLC_187.0976_5.4	-1	0.0166667	1.77815	Exposome (chemical)	Dinoseb	Metabolome	"C9:0,DC FA (Azelaic acid)"
NM4280	pHILIC_189.1596_18.3	-1	0.0166667	1.77815	Exposome (chemical)	Captan	Metabolome	"N6,N6,N6-Trimethyl-L-lysine"
NM4280	nHILIC_212.0022_3	-1	0.0166667	1.77815	Exposome (chemical)	Captan	Metabolome	3-indoxyl sulfate
NM4280	pRPLC_431.3153_10.3	1	0.0166667	1.77815	Exposome (chemical)	Captan	Metabolome	C27H42O4
NM4280	pRPLC_457.2832_11	1	0.0166667	1.77815	Exposome (chemical)	Captan	Metabolome	C24H40O8
NM4280	nRPLC_323.2592_10.4	1	0.0166667	1.77815	Exposome (chemical)	Captan	Metabolome	"C20:2,OH FA"
NM4280	nRPLC_539.2489_8.8	1	0.0166667	1.77815	Exposome (chemical)	Captan	Metabolome	Tetrahydroaldosterone-3-glucuronide(2)
NM4280	nRPLC_183.1025_5.1	1	0.0166667	1.77815	Exposome (chemical)	Captan	Metabolome	C10H16O3(3)
NM4303	pHILIC_114.0661_2.5	0.974679	0.00481823	2.31711	Exposome (chemical)	Fenazaquin	Metabolome	Creatinine
NM4303	pHILIC_298.1139_4.7	0.974679	0.00481823	2.31711	Exposome (chemical)	Fenazaquin	Metabolome	1-Methylguanosine
NM4303	pHILIC_158.1174_6.2	0.974679	0.00481823	2.31711	Exposome (chemical)	Fenazaquin	Metabolome	Homostachydrine
NM4303	pHILIC_205.0969_6.7	0.974679	0.00481823	2.31711	Exposome (chemical)	Fenazaquin	Metabolome	L-Tryptophan
NM4303	pHILIC_150.0581_7	0.974679	0.00481823	2.31711	Exposome (chemical)	Fenazaquin	Metabolome	L-Methionine
NM4303	pHILIC_221.0918_7.5	-0.974679	0.00481823	2.31711	Exposome (chemical)	Fenazaquin	Metabolome	C11H12N2O3(1)
NM4303	pHILIC_130.0862_7.6	-0.974679	0.00481823	2.31711	Exposome (chemical)	Fenazaquin	Metabolome	Pipecolic acid
NM4303	pHILIC_182.081_7.7	0.974679	0.00481823	2.31711	Exposome (chemical)	Fenazaquin	Metabolome	L-Tyrosine
NM4303	pHILIC_188.128_8	0.974679	0.00481823	2.31711	Exposome (chemical)	Fenazaquin	Metabolome	C9H17NO3
NM4303	pHILIC_269.1239_8.3	0.974679	0.00481823	2.31711	Exposome (chemical)	Fenazaquin	Metabolome	Acetylcarnosine
NM4303	pHILIC_245.1856_12.4	0.974679	0.00481823	2.31711	Exposome (chemical)	Fenazaquin	Metabolome	C12H24N2O3
NM4303	nHILIC_188.9862_0.9	-0.974679	0.00481823	2.31711	Exposome (chemical)	Fenazaquin	Metabolome	Catechol sulfate
NM4303	nHILIC_176.0387_4.9	0.974679	0.00481823	2.31711	Exposome (chemical)	Fenazaquin	Metabolome	N-formylmethionine
NM4303	nHILIC_157.0366_6.1	-0.974679	0.00481823	2.31711	Exposome (chemical)	Fenazaquin	Metabolome	Allantoin
NM4303	nHILIC_177.0339_6.7	0.974679	0.00481823	2.31711	Exposome (chemical)	Fenazaquin	Metabolome	Cys Gly
NM4303	nHILIC_74.0246_9.6	0.974679	0.00481823	2.31711	Exposome (chemical)	Fenazaquin	Metabolome	Glycine
NM4303	nHILIC_131.0461_9.7	0.974679	0.00481823	2.31711	Exposome (chemical)	Fenazaquin	Metabolome	L-Asparagine
NM4303	nHILIC_471.1343_11.8	-0.974679	0.00481823	2.31711	Exposome (chemical)	Fenazaquin	Metabolome	C16H26N4O11
NM4303	nHILIC_300.0394_7.2	0.974679	0.00481823	2.31711	Exposome (chemical)	Fenazaquin	Metabolome	C8H15NO9S
NM4303	nHILIC_103.0036_4	-0.974679	0.00481823	2.31711	Exposome (chemical)	Fenazaquin	Metabolome	C3H4O4
NM4303	pRPLC_244.1544_1.7	0.974679	0.00481823	2.31711	Exposome (chemical)	Fenazaquin	Metabolome	C5:1 AC
NM4303	pRPLC_146.06_3	0.974679	0.00481823	2.31711	Exposome (chemical)	Fenazaquin	Metabolome	4-formyl Indole(2)
NM4303	pRPLC_181.0719_3.4	-0.974679	0.00481823	2.31711	Exposome (chemical)	Fenazaquin	Metabolome	Theophylline
NM4303	pRPLC_352.1657_3.7	0.974679	0.00481823	2.31711	Exposome (chemical)	Fenazaquin	Metabolome	Phenylalanyl-Tryptophan
NM4303	nRPLC_159.1027_5.5	0.974679	0.00481823	2.31711	Exposome (chemical)	Fenazaquin	Metabolome	"C8:0,OH FA(2)"
NM4303	nRPLC_209.0819_5.9	0.974679	0.00481823	2.31711	Exposome (chemical)	Fenazaquin	Metabolome	C11H14O4(1)
NM4303	nRPLC_227.1289_7.3	-0.974679	0.00481823	2.31711	Exposome (chemical)	Fenazaquin	Metabolome	"C12:1,DC FA(1)"
NM4303	nRPLC_257.176_8.5	-0.974679	0.00481823	2.31711	Exposome (chemical)	Fenazaquin	Metabolome	"C14:0,DC FA(1)"
NM4303	nRPLC_265.2171_10.3	-0.974679	0.00481823	2.31711	Exposome (chemical)	Fenazaquin	Metabolome	C17:0 FA(2)
NM4303	nRPLC_433.2595_11.1	-0.974679	0.00481823	2.31711	Exposome (chemical)	Fenazaquin	Metabolome	C25H38O6
NM4303	nRPLC_327.2538_10.5	-0.974679	0.00481823	2.31711	Exposome (chemical)	Fenazaquin	Metabolome	MG(16:1)
NM4303	nRPLC_285.2071_9.2	-0.974679	0.00481823	2.31711	Exposome (chemical)	Fenazaquin	Metabolome	"C16:0,DC FA(2)"
NM4303	nRPLC_255.1603_8.1	-0.974679	0.00481823	2.31711	Exposome (chemical)	Fenazaquin	Metabolome	C14H24O4
NM4303	nRPLC_541.2651_7	0.974679	0.00481823	2.31711	Exposome (chemical)	Fenazaquin	Metabolome	C27H42O11(3)
NM4303	nRPLC_151.04_2.3	-0.974679	0.00481823	2.31711	Exposome (chemical)	Fenazaquin	Metabolome	2-Hydroxyphenylacetate
NM4337	pHILIC_137.0457_3.1	-1	0.0166667	1.77815	Exposome (chemical)	Zeranol	Metabolome	Hypoxanthine
NM4337	pHILIC_104.0705_8.1	1	0.0166667	1.77815	Exposome (chemical)	Zeranol	Metabolome	2-Aminobutyrate
NM4337	pHILIC_146.1175_11	1	0.0166667	1.77815	Exposome (chemical)	Zeranol	Metabolome	Acetylcholine
NM4337	nHILIC_303.2327_1	-1	0.0166667	1.77815	Exposome (chemical)	Zeranol	Metabolome	C20:4 FA
NM4337	nHILIC_230.0127_2.1	1	0.0166667	1.77815	Exposome (chemical)	Zeranol	Metabolome	C8H9NO5S
NM4337	nHILIC_181.0367_6.8	-1	0.0166667	1.77815	Exposome (chemical)	Zeranol	Metabolome	1-Methyluric acid
NM4337	nHILIC_132.0302_8.3	1	0.0166667	1.77815	Exposome (chemical)	Zeranol	Metabolome	Iminodiacetate (IDA)
NM4337	nHILIC_183.0294_2.1	-1	0.0166667	1.77815	Exposome (chemical)	Zeranol	Metabolome	C8H8O5
NM4337	nHILIC_281.089_2.2	1	0.0166667	1.77815	Exposome (chemical)	Zeranol	Metabolome	C11H14N4O5
NM4337	nHILIC_165.0404_7.8	1	0.0166667	1.77815	Exposome (chemical)	Zeranol	Metabolome	Arabonate | Xylonate(3)
NM4337	nHILIC_287.052_8.1	1	0.0166667	1.77815	Exposome (chemical)	Zeranol	Metabolome	Orotidine
NM4337	nHILIC_349.0752_8.5	-1	0.0166667	1.77815	Exposome (chemical)	Zeranol	Metabolome	C13H18O11
NM4337	nHILIC_275.0649_8.9	1	0.0166667	1.77815	Exposome (chemical)	Zeranol	Metabolome	Unknown_nHILIC_275.0649_8.9
NM4337	nHILIC_257.0777_2.2	1	0.0166667	1.77815	Exposome (chemical)	Zeranol	Metabolome	5-methyluridine (ribothymidine)
NM4337	nHILIC_137.0243_1	-1	0.0166667	1.77815	Exposome (chemical)	Zeranol	Metabolome	Hydroxybenzoic acid
NM4337	pRPLC_195.0875_4.6	-1	0.0166667	1.77815	Exposome (chemical)	Zeranol	Metabolome	Caffeine
NM4337	pRPLC_302.2328_5.6	1	0.0166667	1.77815	Exposome (chemical)	Zeranol	Metabolome	C9:0 AC
NM4337	pRPLC_505.2774_9.3	-1	0.0166667	1.77815	Exposome (chemical)	Zeranol	Metabolome	C24H36N6O6
NM4337	nRPLC_213.1497_8.1	1	0.0166667	1.77815	Exposome (chemical)	Zeranol	Metabolome	"C12:1,OH FA"
NM4337	nRPLC_229.1445_7.4	-1	0.0166667	1.77815	Exposome (chemical)	Zeranol	Metabolome	"C12:0,DC FA"
NM4337	nRPLC_165.0418_1.9	-1	0.0166667	1.77815	Exposome (chemical)	Zeranol	Metabolome	1-Methylxanthine
NM4337	nRPLC_169.1234_8	1	0.0166667	1.77815	Exposome (chemical)	Zeranol	Metabolome	C10:1 FA(1)
NM4337	nRPLC_215.1653_8.4	1	0.0166667	1.77815	Exposome (chemical)	Zeranol	Metabolome	"C12:0,OH FA(1)"
NM4337	nRPLC_281.1394_9	1	0.0166667	1.77815	Exposome (chemical)	Zeranol	Metabolome	C15H22O5
NM4337	nRPLC_409.3322_11.2	-1	0.0166667	1.77815	Exposome (chemical)	Zeranol	Metabolome	MG(22:2)
NM4337	nRPLC_489.3582_11	-1	0.0166667	1.77815	Exposome (chemical)	Zeranol	Metabolome	C30H50O5(1)
NM4337	nRPLC_507.3686_10.6	-1	0.0166667	1.77815	Exposome (chemical)	Zeranol	Metabolome	C30H52O6
NM4337	nRPLC_453.3221_10.1	-1	0.0166667	1.77815	Exposome (chemical)	Zeranol	Metabolome	C26H46O6(1)
NM4337	nRPLC_295.2278_9.9	1	0.0166667	1.77815	Exposome (chemical)	Zeranol	Metabolome	"C18:2,OH FA"
NM4337	nRPLC_315.2541_9.4	1	0.0166667	1.77815	Exposome (chemical)	Zeranol	Metabolome	MG(15:0)(1)
NM4337	nRPLC_239.1653_8.5	1	0.0166667	1.77815	Exposome (chemical)	Zeranol	Metabolome	"C14:2,OH FA"
NM4337	nRPLC_267.1238_8.3	1	0.0166667	1.77815	Exposome (chemical)	Zeranol	Metabolome	C14H20O5
NM4337	nRPLC_209.1184_8.2	1	0.0166667	1.77815	Exposome (chemical)	Zeranol	Metabolome	C12H18O3(2)
NM4337	nRPLC_213.1498_7.8	1	0.0166667	1.77815	Exposome (chemical)	Zeranol	Metabolome	"C12:1, OH FA"
NM4337	nRPLC_187.1339_7.1	1	0.0166667	1.77815	Exposome (chemical)	Zeranol	Metabolome	"C10:0,OH FA(1)"
NM4337	nRPLC_203.002_1.9	1	0.0166667	1.77815	Exposome (chemical)	Zeranol	Metabolome	4-Methylcatechol sulfate
PM0964	pHILIC_158.1174_6.2	-1	0.0166667	1.77815	Exposome (chemical)	Chloronaphthalene	Metabolome	Homostachydrine
PM0964	pHILIC_182.081_7.7	-1	0.0166667	1.77815	Exposome (chemical)	Chloronaphthalene	Metabolome	L-Tyrosine
PM0964	nHILIC_157.0366_6.1	1	0.0166667	1.77815	Exposome (chemical)	Chloronaphthalene	Metabolome	Allantoin
PM0964	nHILIC_177.0339_6.7	-1	0.0166667	1.77815	Exposome (chemical)	Chloronaphthalene	Metabolome	Cys Gly
PM0964	nHILIC_103.0036_4	1	0.0166667	1.77815	Exposome (chemical)	Chloronaphthalene	Metabolome	C3H4O4
PM0964	nRPLC_257.176_8.5	1	0.0166667	1.77815	Exposome (chemical)	Chloronaphthalene	Metabolome	"C14:0,DC FA(1)"
PM0964	nRPLC_327.2538_10.5	1	0.0166667	1.77815	Exposome (chemical)	Chloronaphthalene	Metabolome	MG(16:1)
PM1171	pHILIC_166.0861_6.2	1	0.0166667	1.77815	Exposome (chemical)	Triethyl phosphate	Metabolome	L-Phenylalanine
PM1171	pHILIC_170.0923_8.5	-1	0.0166667	1.77815	Exposome (chemical)	Triethyl phosphate	Metabolome	1-Methylhistidine
PM1171	pHILIC_350.1185_11.5	1	0.0166667	1.77815	Exposome (chemical)	Triethyl phosphate	Metabolome	C12H19N3O9
PM1171	pHILIC_337.1234_11.6	1	0.0166667	1.77815	Exposome (chemical)	Triethyl phosphate	Metabolome	C12H20N2O9
PM1171	pHILIC_147.1126_15.9	1	0.0166667	1.77815	Exposome (chemical)	Triethyl phosphate	Metabolome	L-Lysine
PM1171	nHILIC_243.0621_3.4	1	0.0166667	1.77815	Exposome (chemical)	Triethyl phosphate	Metabolome	Uridine
PM1171	nHILIC_327.2328_1	1	0.0166667	1.77815	Exposome (chemical)	Triethyl phosphate	Metabolome	C22:6 FA
PM1171	nHILIC_111.0199_3.4	1	0.0166667	1.77815	Exposome (chemical)	Triethyl phosphate	Metabolome	Uracil
PM1171	nHILIC_177.0226_3.6	1	0.0166667	1.77815	Exposome (chemical)	Triethyl phosphate	Metabolome	C6H10O4S
PM1171	nHILIC_481.244_5.2	1	0.0166667	1.77815	Exposome (chemical)	Triethyl phosphate	Metabolome	11-beta-Hydroxyandrosterone-3-glucuronide
PM1171	nHILIC_274.1407_13.3	1	0.0166667	1.77815	Exposome (chemical)	Triethyl phosphate	Metabolome	Epsilon-(gamma-Glutamyl)-lysine
PM1171	nHILIC_168.0778_10.2	1	0.0166667	1.77815	Exposome (chemical)	Triethyl phosphate	Metabolome	3-Methyl-L-histidine
PM1171	nHILIC_85.0294_7.6	-1	0.0166667	1.77815	Exposome (chemical)	Triethyl phosphate	Metabolome	C4H6O2
PM1171	nHILIC_361.1254_3.3	1	0.0166667	1.77815	Exposome (chemical)	Triethyl phosphate	Metabolome	C14H22N2O9
PM1171	pRPLC_162.1123_0.6	1	0.0166667	1.77815	Exposome (chemical)	Triethyl phosphate	Metabolome	L-Carnitine
PM1171	pRPLC_100.0756_1.2	-1	0.0166667	1.77815	Exposome (chemical)	Triethyl phosphate	Metabolome	2-Piperidinone
PM1171	pRPLC_267.1228_8.3	1	0.0166667	1.77815	Exposome (chemical)	Triethyl phosphate	Metabolome	C14H18O5(1)
PM1171	pRPLC_580.4347_11.8	1	0.0166667	1.77815	Exposome (chemical)	Triethyl phosphate	Metabolome	LysoPC(22:0)
PM1171	nRPLC_514.2838_9.6	-1	0.0166667	1.77815	Exposome (chemical)	Triethyl phosphate	Metabolome	Taurocholic acid(1)
PM1171	nRPLC_473.3632_11.4	1	0.0166667	1.77815	Exposome (chemical)	Triethyl phosphate	Metabolome	C30H50O4
PM1171	nRPLC_407.2438_8.8	1	0.0166667	1.77815	Exposome (chemical)	Triethyl phosphate	Metabolome	C23H36O6
PM1171	nRPLC_389.2699_8.8	1	0.0166667	1.77815	Exposome (chemical)	Triethyl phosphate	Metabolome	C24H38O4
PM1171	nRPLC_297.2435_10.2	1	0.0166667	1.77815	Exposome (chemical)	Triethyl phosphate	Metabolome	"C18:1,OH FA(1)"
PM1171	nRPLC_498.2892_10.3	-1	0.0166667	1.77815	Exposome (chemical)	Triethyl phosphate	Metabolome	Tauroursodeoxycholic acid
PM1171	nRPLC_293.2123_9.6	1	0.0166667	1.77815	Exposome (chemical)	Triethyl phosphate	Metabolome	"C18:3,OH FA(2)"
PM1171	nRPLC_163.0765_7.4	-1	0.0166667	1.77815	Exposome (chemical)	Triethyl phosphate	Metabolome	Phenylbutyric acid
PM1171	nRPLC_495.2235_6.2	-1	0.0166667	1.77815	Exposome (chemical)	Triethyl phosphate	Metabolome	C25H36O10
PM1171	nRPLC_209.0814_5.3	-1	0.0166667	1.77815	Exposome (chemical)	Triethyl phosphate	Metabolome	C11H14O4(2)
PM1307	pHILIC_750.5399_3.1	1	0.0166667	1.77815	Exposome (chemical)	Dibromoethane	Metabolome	PE(P-38:5)(2)
PM1307	pHILIC_221.0917_6.6	-1	0.0166667	1.77815	Exposome (chemical)	Dibromoethane	Metabolome	C11H12N2O3(2)
PM1307	pHILIC_171.0763_7.5	1	0.0166667	1.77815	Exposome (chemical)	Dibromoethane	Metabolome	C7H10N2O3
PM1307	pHILIC_147.0763_9.7	1	0.0166667	1.77815	Exposome (chemical)	Dibromoethane	Metabolome	L-Glutamine
PM1307	pHILIC_249.1077_10.8	1	0.0166667	1.77815	Exposome (chemical)	Dibromoethane	Metabolome	gamma-glutamylthreonine(2)
PM1307	pHILIC_203.1501_13.6	1	0.0166667	1.77815	Exposome (chemical)	Dibromoethane	Metabolome	Symmetric dimethylarginine
PM1307	pHILIC_175.1188_15.1	1	0.0166667	1.77815	Exposome (chemical)	Dibromoethane	Metabolome	L-Arginine
PM1307	pHILIC_309.1649_15.6	-1	0.0166667	1.77815	Exposome (chemical)	Dibromoethane	Metabolome	Fructoselysine
PM1307	nHILIC_243.0509_8.1	-1	0.0166667	1.77815	Exposome (chemical)	Dibromoethane	Metabolome	C10H12O7
PM1307	nHILIC_135.0299_7.9	1	0.0166667	1.77815	Exposome (chemical)	Dibromoethane	Metabolome	Threonic acid
PM1307	nHILIC_165.0405_8.5	1	0.0166667	1.77815	Exposome (chemical)	Dibromoethane	Metabolome	Arabonate | Xylonate(1)
PM1307	nHILIC_296.0378_11	1	0.0166667	1.77815	Exposome (chemical)	Dibromoethane	Metabolome	L-Cysteinylglycine disulfide
PM1307	nHILIC_146.0276_5.1	1	0.0166667	1.77815	Exposome (chemical)	Dibromoethane	Metabolome	C8H5NO2
PM1307	nHILIC_133.0506_2.3	1	0.0166667	1.77815	Exposome (chemical)	Dibromoethane	Metabolome	"2,3-Dihydroxyvaleric acid(2)"
PM1307	nHILIC_179.0348_2.2	1	0.0166667	1.77815	Exposome (chemical)	Dibromoethane	Metabolome	4-Hydroxyphenylpyruvic acid
PM1307	pRPLC_260.1858_3.3	1	0.0166667	1.77815	Exposome (chemical)	Dibromoethane	Metabolome	C6:0 AC
PM1307	pRPLC_413.207_4.8	1	0.0166667	1.77815	Exposome (chemical)	Dibromoethane	Metabolome	C23H28N2O5
PM1307	pRPLC_316.2484_6.6	1	0.0166667	1.77815	Exposome (chemical)	Dibromoethane	Metabolome	C10:0 AC
PM1307	pRPLC_227.0914_6.8	1	0.0166667	1.77815	Exposome (chemical)	Dibromoethane	Metabolome	C11H14O5
PM1307	pRPLC_464.1915_7	-1	0.0166667	1.77815	Exposome (chemical)	Dibromoethane	Metabolome	C23H29NO9
PM1307	pRPLC_342.2639_7.2	1	0.0166667	1.77815	Exposome (chemical)	Dibromoethane	Metabolome	C12:1 AC
PM1307	pRPLC_239.1642_8.9	1	0.0166667	1.77815	Exposome (chemical)	Dibromoethane	Metabolome	C14H22O3
PM1307	nRPLC_171.1027_5.6	-1	0.0166667	1.77815	Exposome (chemical)	Dibromoethane	Metabolome	"C9:1,OH FA"
PM1307	nRPLC_333.2073_7.6	-1	0.0166667	1.77815	Exposome (chemical)	Dibromoethane	Metabolome	"C20:4,DC FA"
PM1307	nRPLC_131.0714_1.6	1	0.0166667	1.77815	Exposome (chemical)	Dibromoethane	Metabolome	(S)-(-)-2-Hydroxyisocaproic acid
PM1307	nRPLC_169.1233_8.2	1	0.0166667	1.77815	Exposome (chemical)	Dibromoethane	Metabolome	C10:1 FA(2)
PM1307	nRPLC_243.1964_9.6	1	0.0166667	1.77815	Exposome (chemical)	Dibromoethane	Metabolome	"C14:0,OH FA(2)"
PM1307	nRPLC_319.2278_9.8	1	0.0166667	1.77815	Exposome (chemical)	Dibromoethane	Metabolome	"C20:4,OH FA(2)"
PM1307	nRPLC_445.3324_11.4	1	0.0166667	1.77815	Exposome (chemical)	Dibromoethane	Metabolome	C28H46O4(2)
PM1307	nRPLC_199.1704_9.5	-1	0.0166667	1.77815	Exposome (chemical)	Dibromoethane	Metabolome	C12:0 FA(1)
PM1307	nRPLC_448.3069_9.4	-1	0.0166667	1.77815	Exposome (chemical)	Dibromoethane	Metabolome	Chenodeoxycholic acid glycine conjugate(1)
PM1307	nRPLC_223.1704_9.4	1	0.0166667	1.77815	Exposome (chemical)	Dibromoethane	Metabolome	C14:2 FA
PM1307	nRPLC_243.1965_9.3	1	0.0166667	1.77815	Exposome (chemical)	Dibromoethane	Metabolome	"C14:0,OH FA(1)"
PM1307	nRPLC_241.181_9	1	0.0166667	1.77815	Exposome (chemical)	Dibromoethane	Metabolome	"C14:1,OH FA(1)"
PM1307	nRPLC_197.1547_9	1	0.0166667	1.77815	Exposome (chemical)	Dibromoethane	Metabolome	C12:1 FA(2)
PM1307	nRPLC_514.2853_8.8	-1	0.0166667	1.77815	Exposome (chemical)	Dibromoethane	Metabolome	Taurocholic acid(2)
PM1307	nRPLC_187.0976_5.4	-1	0.0166667	1.77815	Exposome (chemical)	Dibromoethane	Metabolome	"C9:0,DC FA (Azelaic acid)"
PM1880	pHILIC_200.128_6.8	1	0.0166667	1.77815	Exposome (chemical)	p-Hydroxy-meta-chlorophenylpiperazine	Metabolome	C10H17NO3
PM1880	nHILIC_267.0719_4.2	-1	0.0166667	1.77815	Exposome (chemical)	p-Hydroxy-meta-chlorophenylpiperazine	Metabolome	C10H12N4O5
PM1880	nHILIC_335.0495_8.3	1	0.0166667	1.77815	Exposome (chemical)	p-Hydroxy-meta-chlorophenylpiperazine	Metabolome	Uric acid
PM1880	nHILIC_459.1407_2.1	1	0.0166667	1.77815	Exposome (chemical)	p-Hydroxy-meta-chlorophenylpiperazine	Metabolome	C22H24N2O9
PM1880	nHILIC_87.045_4.2	1	0.0166667	1.77815	Exposome (chemical)	p-Hydroxy-meta-chlorophenylpiperazine	Metabolome	Butyric acid|Isobutyric acid
PM1880	nHILIC_129.0192_7.6	-1	0.0166667	1.77815	Exposome (chemical)	p-Hydroxy-meta-chlorophenylpiperazine	Metabolome	C5H6O4
PM1880	nHILIC_116.0352_7.5	1	0.0166667	1.77815	Exposome (chemical)	p-Hydroxy-meta-chlorophenylpiperazine	Metabolome	C4H7NO3
PM1880	nHILIC_160.0615_7.2	1	0.0166667	1.77815	Exposome (chemical)	p-Hydroxy-meta-chlorophenylpiperazine	Metabolome	N-acetylthreonine
PM1880	nHILIC_539.2489_6.5	1	0.0166667	1.77815	Exposome (chemical)	p-Hydroxy-meta-chlorophenylpiperazine	Metabolome	C27H40O11
PM1880	nHILIC_89.0243_5.8	-1	0.0166667	1.77815	Exposome (chemical)	p-Hydroxy-meta-chlorophenylpiperazine	Metabolome	L-Lactic acid
PM1880	pRPLC_246.17_1.9	1	0.0166667	1.77815	Exposome (chemical)	p-Hydroxy-meta-chlorophenylpiperazine	Metabolome	C5:0 AC
PM1880	pRPLC_357.2788_9.5	1	0.0166667	1.77815	Exposome (chemical)	p-Hydroxy-meta-chlorophenylpiperazine	Metabolome	C24H38O3(2)
PM1880	nRPLC_230.9968_4.1	-1	0.0166667	1.77815	Exposome (chemical)	p-Hydroxy-meta-chlorophenylpiperazine	Metabolome	methyl-4-hydroxybenzoate sulfate
PM1880	nRPLC_391.2856_9.5	1	0.0166667	1.77815	Exposome (chemical)	p-Hydroxy-meta-chlorophenylpiperazine	Metabolome	Chenodeoxycholic Acid(2)
PM1880	nRPLC_431.3166_10.4	1	0.0166667	1.77815	Exposome (chemical)	p-Hydroxy-meta-chlorophenylpiperazine	Metabolome	C27H44O4(2)
PM1880	nRPLC_243.1601_8.2	1	0.0166667	1.77815	Exposome (chemical)	p-Hydroxy-meta-chlorophenylpiperazine	Metabolome	"C13:0,DC FA(3)"
PM1880	nRPLC_247.1703_9.4	1	0.0166667	1.77815	Exposome (chemical)	p-Hydroxy-meta-chlorophenylpiperazine	Metabolome	C16:4 FA
PM1880	nRPLC_397.2054_9.6	1	0.0166667	1.77815	Exposome (chemical)	p-Hydroxy-meta-chlorophenylpiperazine	Metabolome	Pregnanolone sulfate
PM1880	nRPLC_297.1343_8.3	1	0.0166667	1.77815	Exposome (chemical)	p-Hydroxy-meta-chlorophenylpiperazine	Metabolome	C15H22O6(3)
PM1880	nRPLC_577.255_7	-1	0.0166667	1.77815	Exposome (chemical)	p-Hydroxy-meta-chlorophenylpiperazine	Metabolome	C32H38N2O8
PM1935	pHILIC_137.0457_3.1	-1	0.0166667	1.77815	Exposome (chemical)	Pymetrozin	Metabolome	Hypoxanthine
PM1935	pHILIC_104.0705_8.1	1	0.0166667	1.77815	Exposome (chemical)	Pymetrozin	Metabolome	2-Aminobutyrate
PM1935	pHILIC_146.1175_11	1	0.0166667	1.77815	Exposome (chemical)	Pymetrozin	Metabolome	Acetylcholine
PM1935	nHILIC_303.2327_1	-1	0.0166667	1.77815	Exposome (chemical)	Pymetrozin	Metabolome	C20:4 FA
PM1935	nHILIC_230.0127_2.1	1	0.0166667	1.77815	Exposome (chemical)	Pymetrozin	Metabolome	C8H9NO5S
PM1935	nHILIC_181.0367_6.8	-1	0.0166667	1.77815	Exposome (chemical)	Pymetrozin	Metabolome	1-Methyluric acid
PM1935	nHILIC_132.0302_8.3	1	0.0166667	1.77815	Exposome (chemical)	Pymetrozin	Metabolome	Iminodiacetate (IDA)
PM1935	nHILIC_183.0294_2.1	-1	0.0166667	1.77815	Exposome (chemical)	Pymetrozin	Metabolome	C8H8O5
PM1935	nHILIC_281.089_2.2	1	0.0166667	1.77815	Exposome (chemical)	Pymetrozin	Metabolome	C11H14N4O5
PM1935	nHILIC_165.0404_7.8	1	0.0166667	1.77815	Exposome (chemical)	Pymetrozin	Metabolome	Arabonate | Xylonate(3)
PM1935	nHILIC_287.052_8.1	1	0.0166667	1.77815	Exposome (chemical)	Pymetrozin	Metabolome	Orotidine
PM1935	nHILIC_349.0752_8.5	-1	0.0166667	1.77815	Exposome (chemical)	Pymetrozin	Metabolome	C13H18O11
PM1935	nHILIC_275.0649_8.9	1	0.0166667	1.77815	Exposome (chemical)	Pymetrozin	Metabolome	Unknown_nHILIC_275.0649_8.9
PM1935	nHILIC_257.0777_2.2	1	0.0166667	1.77815	Exposome (chemical)	Pymetrozin	Metabolome	5-methyluridine (ribothymidine)
PM1935	nHILIC_137.0243_1	-1	0.0166667	1.77815	Exposome (chemical)	Pymetrozin	Metabolome	Hydroxybenzoic acid
PM1935	pRPLC_195.0875_4.6	-1	0.0166667	1.77815	Exposome (chemical)	Pymetrozin	Metabolome	Caffeine
PM1935	pRPLC_302.2328_5.6	1	0.0166667	1.77815	Exposome (chemical)	Pymetrozin	Metabolome	C9:0 AC
PM1935	pRPLC_505.2774_9.3	-1	0.0166667	1.77815	Exposome (chemical)	Pymetrozin	Metabolome	C24H36N6O6
PM1935	nRPLC_213.1497_8.1	1	0.0166667	1.77815	Exposome (chemical)	Pymetrozin	Metabolome	"C12:1,OH FA"
PM1935	nRPLC_229.1445_7.4	-1	0.0166667	1.77815	Exposome (chemical)	Pymetrozin	Metabolome	"C12:0,DC FA"
PM1935	nRPLC_165.0418_1.9	-1	0.0166667	1.77815	Exposome (chemical)	Pymetrozin	Metabolome	1-Methylxanthine
PM1935	nRPLC_169.1234_8	1	0.0166667	1.77815	Exposome (chemical)	Pymetrozin	Metabolome	C10:1 FA(1)
PM1935	nRPLC_215.1653_8.4	1	0.0166667	1.77815	Exposome (chemical)	Pymetrozin	Metabolome	"C12:0,OH FA(1)"
PM1935	nRPLC_281.1394_9	1	0.0166667	1.77815	Exposome (chemical)	Pymetrozin	Metabolome	C15H22O5
PM1935	nRPLC_409.3322_11.2	-1	0.0166667	1.77815	Exposome (chemical)	Pymetrozin	Metabolome	MG(22:2)
PM1935	nRPLC_489.3582_11	-1	0.0166667	1.77815	Exposome (chemical)	Pymetrozin	Metabolome	C30H50O5(1)
PM1935	nRPLC_507.3686_10.6	-1	0.0166667	1.77815	Exposome (chemical)	Pymetrozin	Metabolome	C30H52O6
PM1935	nRPLC_453.3221_10.1	-1	0.0166667	1.77815	Exposome (chemical)	Pymetrozin	Metabolome	C26H46O6(1)
PM1935	nRPLC_295.2278_9.9	1	0.0166667	1.77815	Exposome (chemical)	Pymetrozin	Metabolome	"C18:2,OH FA"
PM1935	nRPLC_315.2541_9.4	1	0.0166667	1.77815	Exposome (chemical)	Pymetrozin	Metabolome	MG(15:0)(1)
PM1935	nRPLC_239.1653_8.5	1	0.0166667	1.77815	Exposome (chemical)	Pymetrozin	Metabolome	"C14:2,OH FA"
PM1935	nRPLC_267.1238_8.3	1	0.0166667	1.77815	Exposome (chemical)	Pymetrozin	Metabolome	C14H20O5
PM1935	nRPLC_209.1184_8.2	1	0.0166667	1.77815	Exposome (chemical)	Pymetrozin	Metabolome	C12H18O3(2)
PM1935	nRPLC_213.1498_7.8	1	0.0166667	1.77815	Exposome (chemical)	Pymetrozin	Metabolome	"C12:1, OH FA"
PM1935	nRPLC_187.1339_7.1	1	0.0166667	1.77815	Exposome (chemical)	Pymetrozin	Metabolome	"C10:0,OH FA(1)"
PM1935	nRPLC_203.002_1.9	1	0.0166667	1.77815	Exposome (chemical)	Pymetrozin	Metabolome	4-Methylcatechol sulfate
PM2296	pHILIC_144.1018_6.7	1	0.0166667	1.77815	Exposome (chemical)	Cyproconazole	Metabolome	Proline betaine
PM2296	pHILIC_157.0607_8.3	-1	0.0166667	1.77815	Exposome (chemical)	Cyproconazole	Metabolome	Imidazolelactic acid
PM2296	pHILIC_229.1544_10.4	-1	0.0166667	1.77815	Exposome (chemical)	Cyproconazole	Metabolome	C11H20N2O3(2)
PM2296	nHILIC_167.0349_1.3	-1	0.0166667	1.77815	Exposome (chemical)	Cyproconazole	Metabolome	5-Methoxysalicylic acid
PM2296	nHILIC_239.0164_12.1	-1	0.0166667	1.77815	Exposome (chemical)	Cyproconazole	Metabolome	L-Cystine
PM2296	nHILIC_269.0875_7.6	1	0.0166667	1.77815	Exposome (chemical)	Cyproconazole	Metabolome	C9H18O9
PM2296	nHILIC_345.0942_3.3	-1	0.0166667	1.77815	Exposome (chemical)	Cyproconazole	Metabolome	C13H18N2O9
PM2296	nHILIC_459.3476_1.8	-1	0.0166667	1.77815	Exposome (chemical)	Cyproconazole	Metabolome	C29H48O4
PM2296	pRPLC_283.1541_8.3	-1	0.0166667	1.77815	Exposome (chemical)	Cyproconazole	Metabolome	C15H22O5_pos
PM2296	pRPLC_491.371_11.3	-1	0.0166667	1.77815	Exposome (chemical)	Cyproconazole	Metabolome	C28H52O5
PM2296	nRPLC_371.189_9.7	-1	0.0166667	1.77815	Exposome (chemical)	Cyproconazole	Metabolome	"5alpha-Androstan-3alpha,17alpha-diol monosulfate(2)"
PM2296	nRPLC_301.2173_10.3	-1	0.0166667	1.77815	Exposome (chemical)	Cyproconazole	Metabolome	C20:5 FA
PM2296	nRPLC_199.0976_5.6	-1	0.0166667	1.77815	Exposome (chemical)	Cyproconazole	Metabolome	"C10:1,DC FA"
PM2296	nRPLC_153.0193_2.1	-1	0.0166667	1.77815	Exposome (chemical)	Cyproconazole	Metabolome	Gentisic acid
PM2296	nRPLC_215.1288_6.8	-1	0.0166667	1.77815	Exposome (chemical)	Cyproconazole	Metabolome	"C11:0,DC FA"
PM2296	nRPLC_329.2336_7.9	1	0.0166667	1.77815	Exposome (chemical)	Cyproconazole	Metabolome	"C18:1,3OH FA"
PM2296	nRPLC_225.186_10	-1	0.0166667	1.77815	Exposome (chemical)	Cyproconazole	Metabolome	C14:1 FA(2)
PM2296	nRPLC_443.3164_11	-1	0.0166667	1.77815	Exposome (chemical)	Cyproconazole	Metabolome	C28H44O4
PM2296	nRPLC_197.1547_9.1	-1	0.0166667	1.77815	Exposome (chemical)	Cyproconazole	Metabolome	C12:1 FA(1)
PM2296	nRPLC_464.3015_8.8	1	0.0166667	1.77815	Exposome (chemical)	Cyproconazole	Metabolome	Glycocholic acid
PM2296	nRPLC_183.139_8.5	-1	0.0166667	1.77815	Exposome (chemical)	Cyproconazole	Metabolome	C11:1 FA
PM2342	nHILIC_581.2411_5.9	1	0.0166667	1.77815	Exposome (chemical)	Butylated triphenyl phosphate	Metabolome	Biliverdin(2)
PM2342	nRPLC_297.2436_10	1	0.0166667	1.77815	Exposome (chemical)	Butylated triphenyl phosphate	Metabolome	"C18:1,OH FA(2)"
PM2342	nRPLC_450.2624_9.5	-1	0.0166667	1.77815	Exposome (chemical)	Butylated triphenyl phosphate	Metabolome	LysoPE(16:1)
PM2342	nRPLC_241.1447_7.7	1	0.0166667	1.77815	Exposome (chemical)	Butylated triphenyl phosphate	Metabolome	C13H22O4
PM2541	pHILIC_104.1069_6.6	1	0.0166667	1.77815	Exposome (chemical)	Amoxicillin	Metabolome	Choline
PM2541	pHILIC_146.0811_7.5	1	0.0166667	1.77815	Exposome (chemical)	Amoxicillin	Metabolome	Isobutyrylglycine
PM2541	pHILIC_161.1283_8.1	1	0.0166667	1.77815	Exposome (chemical)	Amoxicillin	Metabolome	C7H16N2O2
PM2541	nHILIC_329.0306_10.8	-1	0.0166667	1.77815	Exposome (chemical)	Amoxicillin	Metabolome	Unknown_329.0306_10.8
PM2541	nHILIC_247.057_11.8	-1	0.0166667	1.77815	Exposome (chemical)	Amoxicillin	Metabolome	Asp-Asp
PM2541	nHILIC_131.0349_5.1	-1	0.0166667	1.77815	Exposome (chemical)	Amoxicillin	Metabolome	Ethylmalonate
PM2541	nHILIC_103.0036_7.7	-1	0.0166667	1.77815	Exposome (chemical)	Amoxicillin	Metabolome	C5H8O6
PM2541	nHILIC_130.0509_8.8	-1	0.0166667	1.77815	Exposome (chemical)	Amoxicillin	Metabolome	4-Hydroxyproline
PM2541	nHILIC_261.0725_10.7	-1	0.0166667	1.77815	Exposome (chemical)	Amoxicillin	Metabolome	Asp-Glu or Glu-Asp
PM2541	nHILIC_202.1197_13.3	-1	0.0166667	1.77815	Exposome (chemical)	Amoxicillin	Metabolome	Gly-Lys or Lys-Gly
PM2541	nHILIC_116.0716_7.3	1	0.0166667	1.77815	Exposome (chemical)	Amoxicillin	Metabolome	L-Valine
PM2541	nRPLC_389.27_9.4	-1	0.0166667	1.77815	Exposome (chemical)	Amoxicillin	Metabolome	C24H38O4(1)
PM2541	nRPLC_211.1704_9.4	1	0.0166667	1.77815	Exposome (chemical)	Amoxicillin	Metabolome	"C13:1,OH FA"
PM2541	nRPLC_487.3427_9.5	-1	0.0166667	1.77815	Exposome (chemical)	Amoxicillin	Metabolome	C30H48O5(2)
PM2541	nRPLC_267.233_10.6	-1	0.0166667	1.77815	Exposome (chemical)	Amoxicillin	Metabolome	C17:1 FA
PM2541	nRPLC_357.2801_11.2	-1	0.0166667	1.77815	Exposome (chemical)	Amoxicillin	Metabolome	C24:5 FA
PM2541	nRPLC_297.2797_11.2	-1	0.0166667	1.77815	Exposome (chemical)	Amoxicillin	Metabolome	C19:0 FA(2)
PM2541	nRPLC_455.2472_11	-1	0.0166667	1.77815	Exposome (chemical)	Amoxicillin	Metabolome	Sulfolithocholic acid
PM2541	nRPLC_585.486_10.8	-1	0.0166667	1.77815	Exposome (chemical)	Amoxicillin	Metabolome	C36H66O4
PM2549	nHILIC_197.0678_4.1	-1	0.0166667	1.77815	Exposome (chemical)	Tricresyl phosphate	Metabolome	5-Acetylamino-6-amino-3-methyluracil(2)
PM2549	nHILIC_168.0276_10.3	-1	0.0166667	1.77815	Exposome (chemical)	Tricresyl phosphate	Metabolome	L-Glutamic acid
PM2549	pRPLC_288.2172_5.1	1	0.0166667	1.77815	Exposome (chemical)	Tricresyl phosphate	Metabolome	C8:0 AC(2)
PM2549	pRPLC_286.1439_8.4	-1	0.0166667	1.77815	Exposome (chemical)	Tricresyl phosphate	Metabolome	Piperine(2)
PM2549	nRPLC_527.2129_7.1	1	0.0166667	1.77815	Exposome (chemical)	Tricresyl phosphate	Metabolome	C25H36O12
PM2654	pHILIC_130.0863_6.6	-1	0.0166667	1.77815	Exposome (chemical)	2,2',3,3',4,4',5-Heptachlorobiphenyl (PCB 170)	Metabolome	N-methylproline
PM2654	pHILIC_299.1383_7.5	1	0.0166667	1.77815	Exposome (chemical)	2,2',3,3',4,4',5-Heptachlorobiphenyl (PCB 170)	Metabolome	C17H18N2O3
PM2654	pHILIC_280.1384_8	1	0.0166667	1.77815	Exposome (chemical)	2,2',3,3',4,4',5-Heptachlorobiphenyl (PCB 170)	Metabolome	N-(1-Deoxy-1-fructosyl)valine
PM2654	nHILIC_87.0087_4.4	-1	0.0166667	1.77815	Exposome (chemical)	2,2',3,3',4,4',5-Heptachlorobiphenyl (PCB 170)	Metabolome	Pyruvic acid
PM2654	nHILIC_219.0451_7.2	1	0.0166667	1.77815	Exposome (chemical)	2,2',3,3',4,4',5-Heptachlorobiphenyl (PCB 170)	Metabolome	C7H12N2O4S
PM2654	nRPLC_329.2487_10.7	1	0.0166667	1.77815	Exposome (chemical)	2,2',3,3',4,4',5-Heptachlorobiphenyl (PCB 170)	Metabolome	C22:5 FA
PM2654	nRPLC_313.2385_10.3	1	0.0166667	1.77815	Exposome (chemical)	2,2',3,3',4,4',5-Heptachlorobiphenyl (PCB 170)	Metabolome	"C18:0,DC FA(1)"
PM2654	nRPLC_445.3324_11.2	1	0.0166667	1.77815	Exposome (chemical)	2,2',3,3',4,4',5-Heptachlorobiphenyl (PCB 170)	Metabolome	C28H46O4(3)
PM2654	nRPLC_227.1289_6.9	1	0.0166667	1.77815	Exposome (chemical)	2,2',3,3',4,4',5-Heptachlorobiphenyl (PCB 170)	Metabolome	"C12:1,DC FA(2)"
PM3067	pHILIC_114.0661_2.5	1	0.0166667	1.77815	Exposome (chemical)	Tetrabromobisphenol A diallyl ether	Metabolome	Creatinine
PM3067	pHILIC_298.1139_4.7	1	0.0166667	1.77815	Exposome (chemical)	Tetrabromobisphenol A diallyl ether	Metabolome	1-Methylguanosine
PM3067	pHILIC_205.0969_6.7	1	0.0166667	1.77815	Exposome (chemical)	Tetrabromobisphenol A diallyl ether	Metabolome	L-Tryptophan
PM3067	pHILIC_150.0581_7	1	0.0166667	1.77815	Exposome (chemical)	Tetrabromobisphenol A diallyl ether	Metabolome	L-Methionine
PM3067	pHILIC_221.0918_7.5	-1	0.0166667	1.77815	Exposome (chemical)	Tetrabromobisphenol A diallyl ether	Metabolome	C11H12N2O3(1)
PM3067	pHILIC_130.0862_7.6	-1	0.0166667	1.77815	Exposome (chemical)	Tetrabromobisphenol A diallyl ether	Metabolome	Pipecolic acid
PM3067	pHILIC_188.128_8	1	0.0166667	1.77815	Exposome (chemical)	Tetrabromobisphenol A diallyl ether	Metabolome	C9H17NO3
PM3067	pHILIC_269.1239_8.3	1	0.0166667	1.77815	Exposome (chemical)	Tetrabromobisphenol A diallyl ether	Metabolome	Acetylcarnosine
PM3067	pHILIC_245.1856_12.4	1	0.0166667	1.77815	Exposome (chemical)	Tetrabromobisphenol A diallyl ether	Metabolome	C12H24N2O3
PM3067	nHILIC_188.9862_0.9	-1	0.0166667	1.77815	Exposome (chemical)	Tetrabromobisphenol A diallyl ether	Metabolome	Catechol sulfate
PM3067	nHILIC_176.0387_4.9	1	0.0166667	1.77815	Exposome (chemical)	Tetrabromobisphenol A diallyl ether	Metabolome	N-formylmethionine
PM3067	nHILIC_74.0246_9.6	1	0.0166667	1.77815	Exposome (chemical)	Tetrabromobisphenol A diallyl ether	Metabolome	Glycine
PM3067	nHILIC_131.0461_9.7	1	0.0166667	1.77815	Exposome (chemical)	Tetrabromobisphenol A diallyl ether	Metabolome	L-Asparagine
PM3067	nHILIC_471.1343_11.8	-1	0.0166667	1.77815	Exposome (chemical)	Tetrabromobisphenol A diallyl ether	Metabolome	C16H26N4O11
PM3067	nHILIC_300.0394_7.2	1	0.0166667	1.77815	Exposome (chemical)	Tetrabromobisphenol A diallyl ether	Metabolome	C8H15NO9S
PM3067	pRPLC_244.1544_1.7	1	0.0166667	1.77815	Exposome (chemical)	Tetrabromobisphenol A diallyl ether	Metabolome	C5:1 AC
PM3067	pRPLC_146.06_3	1	0.0166667	1.77815	Exposome (chemical)	Tetrabromobisphenol A diallyl ether	Metabolome	4-formyl Indole(2)
PM3067	pRPLC_181.0719_3.4	-1	0.0166667	1.77815	Exposome (chemical)	Tetrabromobisphenol A diallyl ether	Metabolome	Theophylline
PM3067	pRPLC_352.1657_3.7	1	0.0166667	1.77815	Exposome (chemical)	Tetrabromobisphenol A diallyl ether	Metabolome	Phenylalanyl-Tryptophan
PM3067	nRPLC_159.1027_5.5	1	0.0166667	1.77815	Exposome (chemical)	Tetrabromobisphenol A diallyl ether	Metabolome	"C8:0,OH FA(2)"
PM3067	nRPLC_209.0819_5.9	1	0.0166667	1.77815	Exposome (chemical)	Tetrabromobisphenol A diallyl ether	Metabolome	C11H14O4(1)
PM3067	nRPLC_227.1289_7.3	-1	0.0166667	1.77815	Exposome (chemical)	Tetrabromobisphenol A diallyl ether	Metabolome	"C12:1,DC FA(1)"
PM3067	nRPLC_265.2171_10.3	-1	0.0166667	1.77815	Exposome (chemical)	Tetrabromobisphenol A diallyl ether	Metabolome	C17:0 FA(2)
PM3067	nRPLC_433.2595_11.1	-1	0.0166667	1.77815	Exposome (chemical)	Tetrabromobisphenol A diallyl ether	Metabolome	C25H38O6
PM3067	nRPLC_285.2071_9.2	-1	0.0166667	1.77815	Exposome (chemical)	Tetrabromobisphenol A diallyl ether	Metabolome	"C16:0,DC FA(2)"
PM3067	nRPLC_255.1603_8.1	-1	0.0166667	1.77815	Exposome (chemical)	Tetrabromobisphenol A diallyl ether	Metabolome	C14H24O4
PM3067	nRPLC_541.2651_7	1	0.0166667	1.77815	Exposome (chemical)	Tetrabromobisphenol A diallyl ether	Metabolome	C27H42O11(3)
PM3067	nRPLC_151.04_2.3	-1	0.0166667	1.77815	Exposome (chemical)	Tetrabromobisphenol A diallyl ether	Metabolome	2-Hydroxyphenylacetate
NM1254	CFD	0.974679	0.00481823	2.31711	Exposome (chemical)	Salicylic acid	Proteome	CFD
NM1254	LV144	-0.974679	0.00481823	2.31711	Exposome (chemical)	Salicylic acid	Proteome	LV144
NM1254	APOC1	0.974679	0.00481823	2.31711	Exposome (chemical)	Salicylic acid	Proteome	APOC1
NM1254	KV315	-0.974679	0.00481823	2.31711	Exposome (chemical)	Salicylic acid	Proteome	KV315
NM1254	SERPINA5	-0.974679	0.00481823	2.31711	Exposome (chemical)	Salicylic acid	Proteome	SERPINA5
NM1254	APOA4	0.974679	0.00481823	2.31711	Exposome (chemical)	Salicylic acid	Proteome	APOA4
NM1254	MYH7	-0.974679	0.00481823	2.31711	Exposome (chemical)	Salicylic acid	Proteome	MYH7
NM1254	INHBC	-0.974679	0.00481823	2.31711	Exposome (chemical)	Salicylic acid	Proteome	INHBC
NM1254	DYNC1H1	0.974679	0.00481823	2.31711	Exposome (chemical)	Salicylic acid	Proteome	DYNC1H1
NM1254	PSTK	-0.974679	0.00481823	2.31711	Exposome (chemical)	Salicylic acid	Proteome	PSTK
NM1254	FAM3C	0.974679	0.00481823	2.31711	Exposome (chemical)	Salicylic acid	Proteome	FAM3C
NM1254	SH3GL3	-0.974679	0.00481823	2.31711	Exposome (chemical)	Salicylic acid	Proteome	SH3GL3
NM1254	MAN2B2	0.974679	0.00481823	2.31711	Exposome (chemical)	Salicylic acid	Proteome	MAN2B2
NM1446	CFD	-1	0.0166667	1.77815	Exposome (chemical)	Trimethyl Phosphate	Proteome	CFD
NM1446	LV144	1	0.0166667	1.77815	Exposome (chemical)	Trimethyl Phosphate	Proteome	LV144
NM1446	APOC1	-1	0.0166667	1.77815	Exposome (chemical)	Trimethyl Phosphate	Proteome	APOC1
NM1446	KV315	1	0.0166667	1.77815	Exposome (chemical)	Trimethyl Phosphate	Proteome	KV315
NM1446	APOA4	-1	0.0166667	1.77815	Exposome (chemical)	Trimethyl Phosphate	Proteome	APOA4
NM1446	INHBC	1	0.0166667	1.77815	Exposome (chemical)	Trimethyl Phosphate	Proteome	INHBC
NM1446	DYNC1H1	-1	0.0166667	1.77815	Exposome (chemical)	Trimethyl Phosphate	Proteome	DYNC1H1
NM1446	FAM3C	-1	0.0166667	1.77815	Exposome (chemical)	Trimethyl Phosphate	Proteome	FAM3C
NM1446	SH3GL3	1	0.0166667	1.77815	Exposome (chemical)	Trimethyl Phosphate	Proteome	SH3GL3
NM1446	MAN2B2	-1	0.0166667	1.77815	Exposome (chemical)	Trimethyl Phosphate	Proteome	MAN2B2
NM1550	F9	-1	0.0166667	1.77815	Exposome (chemical)	4-Chloro-o-toluidine	Proteome	F9
NM1550	IGHG4	-1	0.0166667	1.77815	Exposome (chemical)	4-Chloro-o-toluidine	Proteome	IGHG4
NM1550	FGB	1	0.0166667	1.77815	Exposome (chemical)	4-Chloro-o-toluidine	Proteome	FGB
NM1550	VTN	1	0.0166667	1.77815	Exposome (chemical)	4-Chloro-o-toluidine	Proteome	VTN
NM1550	CLEC3B	-1	0.0166667	1.77815	Exposome (chemical)	4-Chloro-o-toluidine	Proteome	CLEC3B
NM1550	SERPINA7	-1	0.0166667	1.77815	Exposome (chemical)	4-Chloro-o-toluidine	Proteome	SERPINA7
NM1550	PROS1	1	0.0166667	1.77815	Exposome (chemical)	4-Chloro-o-toluidine	Proteome	PROS1
NM1550	CLU.1	1	0.0166667	1.77815	Exposome (chemical)	4-Chloro-o-toluidine	Proteome	CLU.1
NM1550	COL6A3	-1	0.0166667	1.77815	Exposome (chemical)	4-Chloro-o-toluidine	Proteome	COL6A3
NM1550	ITIH2	1	0.0166667	1.77815	Exposome (chemical)	4-Chloro-o-toluidine	Proteome	ITIH2
NM1550	PROZ	1	0.0166667	1.77815	Exposome (chemical)	4-Chloro-o-toluidine	Proteome	PROZ
NM1550	HGFAC	1	0.0166667	1.77815	Exposome (chemical)	4-Chloro-o-toluidine	Proteome	HGFAC
NM1550	MMRN1	1	0.0166667	1.77815	Exposome (chemical)	4-Chloro-o-toluidine	Proteome	MMRN1
NM1550	PRG4	-1	0.0166667	1.77815	Exposome (chemical)	4-Chloro-o-toluidine	Proteome	PRG4
NM1550	C1RL	1	0.0166667	1.77815	Exposome (chemical)	4-Chloro-o-toluidine	Proteome	C1RL
NM2680	CFD	-1	0.0166667	1.77815	Exposome (chemical)	Tetrachloroethylene	Proteome	CFD
NM2680	LV144	1	0.0166667	1.77815	Exposome (chemical)	Tetrachloroethylene	Proteome	LV144
NM2680	APOC1	-1	0.0166667	1.77815	Exposome (chemical)	Tetrachloroethylene	Proteome	APOC1
NM2680	KV315	1	0.0166667	1.77815	Exposome (chemical)	Tetrachloroethylene	Proteome	KV315
NM2680	APOA4	-1	0.0166667	1.77815	Exposome (chemical)	Tetrachloroethylene	Proteome	APOA4
NM2680	INHBC	1	0.0166667	1.77815	Exposome (chemical)	Tetrachloroethylene	Proteome	INHBC
NM2680	DYNC1H1	-1	0.0166667	1.77815	Exposome (chemical)	Tetrachloroethylene	Proteome	DYNC1H1
NM2680	FAM3C	-1	0.0166667	1.77815	Exposome (chemical)	Tetrachloroethylene	Proteome	FAM3C
NM2680	SH3GL3	1	0.0166667	1.77815	Exposome (chemical)	Tetrachloroethylene	Proteome	SH3GL3
NM2680	MAN2B2	-1	0.0166667	1.77815	Exposome (chemical)	Tetrachloroethylene	Proteome	MAN2B2
NM3057	CP	1	0.0166667	1.77815	Exposome (chemical)	Acephate	Proteome	CP
NM3057	HV333_2	-1	0.0166667	1.77815	Exposome (chemical)	Acephate	Proteome	HV333_2
NM3057	A1BG	1	0.0166667	1.77815	Exposome (chemical)	Acephate	Proteome	A1BG
NM3057	VCL	1	0.0166667	1.77815	Exposome (chemical)	Acephate	Proteome	VCL
NM3057	C4BPB	1	0.0166667	1.77815	Exposome (chemical)	Acephate	Proteome	C4BPB
NM3057	SEPP1	1	0.0166667	1.77815	Exposome (chemical)	Acephate	Proteome	SEPP1
NM3057	AFG3L2	1	0.0166667	1.77815	Exposome (chemical)	Acephate	Proteome	AFG3L2
NM3853	SERPINA1	1	0.0166667	1.77815	Exposome (chemical)	Dinoseb	Proteome	SERPINA1
NM3853	APOA1	1	0.0166667	1.77815	Exposome (chemical)	Dinoseb	Proteome	APOA1
NM3853	APOA2	1	0.0166667	1.77815	Exposome (chemical)	Dinoseb	Proteome	APOA2
NM3853	IGHM.1	-1	0.0166667	1.77815	Exposome (chemical)	Dinoseb	Proteome	IGHM.1
NM3853	LV657_2	-1	0.0166667	1.77815	Exposome (chemical)	Dinoseb	Proteome	LV657_2
NM3853	PCOLCE	-1	0.0166667	1.77815	Exposome (chemical)	Dinoseb	Proteome	PCOLCE
NM3853	RYR2	1	0.0166667	1.77815	Exposome (chemical)	Dinoseb	Proteome	RYR2
NM3853	CFHR5	1	0.0166667	1.77815	Exposome (chemical)	Dinoseb	Proteome	CFHR5
NM4280	CD5L	-1	0.0166667	1.77815	Exposome (chemical)	Captan	Proteome	CD5L
NM4280	BCHE	-1	0.0166667	1.77815	Exposome (chemical)	Captan	Proteome	BCHE
NM4280	PFN1	-1	0.0166667	1.77815	Exposome (chemical)	Captan	Proteome	PFN1
NM4280	CFP	-1	0.0166667	1.77815	Exposome (chemical)	Captan	Proteome	CFP
NM4280	COMP	1	0.0166667	1.77815	Exposome (chemical)	Captan	Proteome	COMP
NM4303	CEP290	-0.974679	0.00481823	2.31711	Exposome (chemical)	Fenazaquin	Proteome	CEP290
NM4303	CA1	-0.974679	0.00481823	2.31711	Exposome (chemical)	Fenazaquin	Proteome	CA1
NM4303	CST3	0.974679	0.00481823	2.31711	Exposome (chemical)	Fenazaquin	Proteome	CST3
NM4303	KVD33_4	-0.974679	0.00481823	2.31711	Exposome (chemical)	Fenazaquin	Proteome	KVD33_4
NM4303	KV320_2	-0.974679	0.00481823	2.31711	Exposome (chemical)	Fenazaquin	Proteome	KV320_2
NM4303	IGHG2	-0.974679	0.00481823	2.31711	Exposome (chemical)	Fenazaquin	Proteome	IGHG2
NM4303	C1QB	-0.974679	0.00481823	2.31711	Exposome (chemical)	Fenazaquin	Proteome	C1QB
NM4303	C1QC	-0.974679	0.00481823	2.31711	Exposome (chemical)	Fenazaquin	Proteome	C1QC
NM4303	FN1	0.974679	0.00481823	2.31711	Exposome (chemical)	Fenazaquin	Proteome	FN1
NM4303	PPBP	0.974679	0.00481823	2.31711	Exposome (chemical)	Fenazaquin	Proteome	PPBP
NM4303	HPX	0.974679	0.00481823	2.31711	Exposome (chemical)	Fenazaquin	Proteome	HPX
NM4303	PROC	0.974679	0.00481823	2.31711	Exposome (chemical)	Fenazaquin	Proteome	PROC
NM4303	VWF	0.974679	0.00481823	2.31711	Exposome (chemical)	Fenazaquin	Proteome	VWF
NM4303	KV311	-0.974679	0.00481823	2.31711	Exposome (chemical)	Fenazaquin	Proteome	KV311
NM4303	KV310	-0.974679	0.00481823	2.31711	Exposome (chemical)	Fenazaquin	Proteome	KV310
NM4303	APOD	-0.974679	0.00481823	2.31711	Exposome (chemical)	Fenazaquin	Proteome	APOD
NM4303	F7	-0.974679	0.00481823	2.31711	Exposome (chemical)	Fenazaquin	Proteome	F7
NM4303	HV102	-0.974679	0.00481823	2.31711	Exposome (chemical)	Fenazaquin	Proteome	HV102
NM4303	AZGP1	-0.974679	0.00481823	2.31711	Exposome (chemical)	Fenazaquin	Proteome	AZGP1
NM4303	ECM1	0.974679	0.00481823	2.31711	Exposome (chemical)	Fenazaquin	Proteome	ECM1
NM4303	VASN	0.974679	0.00481823	2.31711	Exposome (chemical)	Fenazaquin	Proteome	VASN
NM4303	TTN	0.974679	0.00481823	2.31711	Exposome (chemical)	Fenazaquin	Proteome	TTN
NM4303	PCYOX1	-0.974679	0.00481823	2.31711	Exposome (chemical)	Fenazaquin	Proteome	PCYOX1
NM4303	SERPINA10	0.974679	0.00481823	2.31711	Exposome (chemical)	Fenazaquin	Proteome	SERPINA10
NM4303	FAM161B	-0.974679	0.00481823	2.31711	Exposome (chemical)	Fenazaquin	Proteome	FAM161B
NM4337	CFD	1	0.0166667	1.77815	Exposome (chemical)	Zeranol	Proteome	CFD
NM4337	LV144	-1	0.0166667	1.77815	Exposome (chemical)	Zeranol	Proteome	LV144
NM4337	APOC1	1	0.0166667	1.77815	Exposome (chemical)	Zeranol	Proteome	APOC1
NM4337	KV315	-1	0.0166667	1.77815	Exposome (chemical)	Zeranol	Proteome	KV315
NM4337	APOA4	1	0.0166667	1.77815	Exposome (chemical)	Zeranol	Proteome	APOA4
NM4337	INHBC	-1	0.0166667	1.77815	Exposome (chemical)	Zeranol	Proteome	INHBC
NM4337	DYNC1H1	1	0.0166667	1.77815	Exposome (chemical)	Zeranol	Proteome	DYNC1H1
NM4337	FAM3C	1	0.0166667	1.77815	Exposome (chemical)	Zeranol	Proteome	FAM3C
NM4337	SH3GL3	-1	0.0166667	1.77815	Exposome (chemical)	Zeranol	Proteome	SH3GL3
NM4337	MAN2B2	1	0.0166667	1.77815	Exposome (chemical)	Zeranol	Proteome	MAN2B2
PM0964	FN1	-1	0.0166667	1.77815	Exposome (chemical)	Chloronaphthalene	Proteome	FN1
PM0964	SERPINA10	-1	0.0166667	1.77815	Exposome (chemical)	Chloronaphthalene	Proteome	SERPINA10
PM1171	C3	1	0.0166667	1.77815	Exposome (chemical)	Triethyl phosphate	Proteome	C3
PM1171	KVD28	1	0.0166667	1.77815	Exposome (chemical)	Triethyl phosphate	Proteome	KVD28
PM1171	LV321	-1	0.0166667	1.77815	Exposome (chemical)	Triethyl phosphate	Proteome	LV321
PM1171	IGHD	-1	0.0166667	1.77815	Exposome (chemical)	Triethyl phosphate	Proteome	IGHD
PM1171	FGA	1	0.0166667	1.77815	Exposome (chemical)	Triethyl phosphate	Proteome	FGA
PM1171	LRG1	1	0.0166667	1.77815	Exposome (chemical)	Triethyl phosphate	Proteome	LRG1
PM1171	AHSG	1	0.0166667	1.77815	Exposome (chemical)	Triethyl phosphate	Proteome	AHSG
PM1171	HV270	-1	0.0166667	1.77815	Exposome (chemical)	Triethyl phosphate	Proteome	HV270
PM1171	C4A	-1	0.0166667	1.77815	Exposome (chemical)	Triethyl phosphate	Proteome	C4A
PM1171	SELL	-1	0.0166667	1.77815	Exposome (chemical)	Triethyl phosphate	Proteome	SELL
PM1171	MCAM	1	0.0166667	1.77815	Exposome (chemical)	Triethyl phosphate	Proteome	MCAM
PM1171	HBA1	1	0.0166667	1.77815	Exposome (chemical)	Triethyl phosphate	Proteome	HBA1
PM1171	ITIH3	1	0.0166667	1.77815	Exposome (chemical)	Triethyl phosphate	Proteome	ITIH3
PM1171	COLEC11	1	0.0166667	1.77815	Exposome (chemical)	Triethyl phosphate	Proteome	COLEC11
PM1171	IL1RAP.1	-1	0.0166667	1.77815	Exposome (chemical)	Triethyl phosphate	Proteome	IL1RAP.1
PM1171	LYVE1	1	0.0166667	1.77815	Exposome (chemical)	Triethyl phosphate	Proteome	LYVE1
PM1171	FCGBP	-1	0.0166667	1.77815	Exposome (chemical)	Triethyl phosphate	Proteome	FCGBP
PM1307	SERPINA1	1	0.0166667	1.77815	Exposome (chemical)	Dibromoethane	Proteome	SERPINA1
PM1307	APOA1	1	0.0166667	1.77815	Exposome (chemical)	Dibromoethane	Proteome	APOA1
PM1307	APOA2	1	0.0166667	1.77815	Exposome (chemical)	Dibromoethane	Proteome	APOA2
PM1307	IGHM.1	-1	0.0166667	1.77815	Exposome (chemical)	Dibromoethane	Proteome	IGHM.1
PM1307	LV657_2	-1	0.0166667	1.77815	Exposome (chemical)	Dibromoethane	Proteome	LV657_2
PM1307	PCOLCE	-1	0.0166667	1.77815	Exposome (chemical)	Dibromoethane	Proteome	PCOLCE
PM1307	RYR2	1	0.0166667	1.77815	Exposome (chemical)	Dibromoethane	Proteome	RYR2
PM1307	CFHR5	1	0.0166667	1.77815	Exposome (chemical)	Dibromoethane	Proteome	CFHR5
PM1880	F9	-1	0.0166667	1.77815	Exposome (chemical)	p-Hydroxy-meta-chlorophenylpiperazine	Proteome	F9
PM1880	IGHG4	-1	0.0166667	1.77815	Exposome (chemical)	p-Hydroxy-meta-chlorophenylpiperazine	Proteome	IGHG4
PM1880	FGB	1	0.0166667	1.77815	Exposome (chemical)	p-Hydroxy-meta-chlorophenylpiperazine	Proteome	FGB
PM1880	VTN	1	0.0166667	1.77815	Exposome (chemical)	p-Hydroxy-meta-chlorophenylpiperazine	Proteome	VTN
PM1880	CLEC3B	-1	0.0166667	1.77815	Exposome (chemical)	p-Hydroxy-meta-chlorophenylpiperazine	Proteome	CLEC3B
PM1880	SERPINA7	-1	0.0166667	1.77815	Exposome (chemical)	p-Hydroxy-meta-chlorophenylpiperazine	Proteome	SERPINA7
PM1880	PROS1	1	0.0166667	1.77815	Exposome (chemical)	p-Hydroxy-meta-chlorophenylpiperazine	Proteome	PROS1
PM1880	CLU.1	1	0.0166667	1.77815	Exposome (chemical)	p-Hydroxy-meta-chlorophenylpiperazine	Proteome	CLU.1
PM1880	COL6A3	-1	0.0166667	1.77815	Exposome (chemical)	p-Hydroxy-meta-chlorophenylpiperazine	Proteome	COL6A3
PM1880	ITIH2	1	0.0166667	1.77815	Exposome (chemical)	p-Hydroxy-meta-chlorophenylpiperazine	Proteome	ITIH2
PM1880	PROZ	1	0.0166667	1.77815	Exposome (chemical)	p-Hydroxy-meta-chlorophenylpiperazine	Proteome	PROZ
PM1880	HGFAC	1	0.0166667	1.77815	Exposome (chemical)	p-Hydroxy-meta-chlorophenylpiperazine	Proteome	HGFAC
PM1880	MMRN1	1	0.0166667	1.77815	Exposome (chemical)	p-Hydroxy-meta-chlorophenylpiperazine	Proteome	MMRN1
PM1880	PRG4	-1	0.0166667	1.77815	Exposome (chemical)	p-Hydroxy-meta-chlorophenylpiperazine	Proteome	PRG4
PM1880	C1RL	1	0.0166667	1.77815	Exposome (chemical)	p-Hydroxy-meta-chlorophenylpiperazine	Proteome	C1RL
PM1935	CFD	1	0.0166667	1.77815	Exposome (chemical)	Pymetrozin	Proteome	CFD
PM1935	LV144	-1	0.0166667	1.77815	Exposome (chemical)	Pymetrozin	Proteome	LV144
PM1935	APOC1	1	0.0166667	1.77815	Exposome (chemical)	Pymetrozin	Proteome	APOC1
PM1935	KV315	-1	0.0166667	1.77815	Exposome (chemical)	Pymetrozin	Proteome	KV315
PM1935	APOA4	1	0.0166667	1.77815	Exposome (chemical)	Pymetrozin	Proteome	APOA4
PM1935	INHBC	-1	0.0166667	1.77815	Exposome (chemical)	Pymetrozin	Proteome	INHBC
PM1935	DYNC1H1	1	0.0166667	1.77815	Exposome (chemical)	Pymetrozin	Proteome	DYNC1H1
PM1935	FAM3C	1	0.0166667	1.77815	Exposome (chemical)	Pymetrozin	Proteome	FAM3C
PM1935	SH3GL3	-1	0.0166667	1.77815	Exposome (chemical)	Pymetrozin	Proteome	SH3GL3
PM1935	MAN2B2	1	0.0166667	1.77815	Exposome (chemical)	Pymetrozin	Proteome	MAN2B2
PM2296	ATRN	1	0.0166667	1.77815	Exposome (chemical)	Cyproconazole	Proteome	ATRN
PM2296	KVD33_2	-1	0.0166667	1.77815	Exposome (chemical)	Cyproconazole	Proteome	KVD33_2
PM2296	LV211	-1	0.0166667	1.77815	Exposome (chemical)	Cyproconazole	Proteome	LV211
PM2296	PIGR	-1	0.0166667	1.77815	Exposome (chemical)	Cyproconazole	Proteome	PIGR
PM2296	C9	-1	0.0166667	1.77815	Exposome (chemical)	Cyproconazole	Proteome	C9
PM2296	SERPIND1	-1	0.0166667	1.77815	Exposome (chemical)	Cyproconazole	Proteome	SERPIND1
PM2296	HV434	-1	0.0166667	1.77815	Exposome (chemical)	Cyproconazole	Proteome	HV434
PM2296	GP1BA	1	0.0166667	1.77815	Exposome (chemical)	Cyproconazole	Proteome	GP1BA
PM2296	MGP	-1	0.0166667	1.77815	Exposome (chemical)	Cyproconazole	Proteome	MGP
PM2296	SERPINF2	-1	0.0166667	1.77815	Exposome (chemical)	Cyproconazole	Proteome	SERPINF2
PM2296	CLU	-1	0.0166667	1.77815	Exposome (chemical)	Cyproconazole	Proteome	CLU
PM2296	MTHFD1	-1	0.0166667	1.77815	Exposome (chemical)	Cyproconazole	Proteome	MTHFD1
PM2296	LCP1	1	0.0166667	1.77815	Exposome (chemical)	Cyproconazole	Proteome	LCP1
PM2296	DSP	-1	0.0166667	1.77815	Exposome (chemical)	Cyproconazole	Proteome	DSP
PM2296	GPX3	1	0.0166667	1.77815	Exposome (chemical)	Cyproconazole	Proteome	GPX3
PM2296	CFHR2	1	0.0166667	1.77815	Exposome (chemical)	Cyproconazole	Proteome	CFHR2
PM2296	BTD	1	0.0166667	1.77815	Exposome (chemical)	Cyproconazole	Proteome	BTD
PM2296	ACTBL2	1	0.0166667	1.77815	Exposome (chemical)	Cyproconazole	Proteome	ACTBL2
PM2342	HPR	-1	0.0166667	1.77815	Exposome (chemical)	Butylated triphenyl phosphate	Proteome	HPR
PM2342	CFB	1	0.0166667	1.77815	Exposome (chemical)	Butylated triphenyl phosphate	Proteome	CFB
PM2342	IGF2	1	0.0166667	1.77815	Exposome (chemical)	Butylated triphenyl phosphate	Proteome	IGF2
PM2342	IGHM	1	0.0166667	1.77815	Exposome (chemical)	Butylated triphenyl phosphate	Proteome	IGHM
PM2342	GAPDH	1	0.0166667	1.77815	Exposome (chemical)	Butylated triphenyl phosphate	Proteome	GAPDH
PM2342	GSN	1	0.0166667	1.77815	Exposome (chemical)	Butylated triphenyl phosphate	Proteome	GSN
PM2342	PLTP	1	0.0166667	1.77815	Exposome (chemical)	Butylated triphenyl phosphate	Proteome	PLTP
PM2541	C5	-1	0.0166667	1.77815	Exposome (chemical)	Amoxicillin	Proteome	C5
PM2541	KNG1_2	-1	0.0166667	1.77815	Exposome (chemical)	Amoxicillin	Proteome	KNG1_2
PM2541	HV146	-1	0.0166667	1.77815	Exposome (chemical)	Amoxicillin	Proteome	HV146
PM2541	ORM2	-1	0.0166667	1.77815	Exposome (chemical)	Amoxicillin	Proteome	ORM2
PM2549	FCN3	-1	0.0166667	1.77815	Exposome (chemical)	Tricresyl phosphate	Proteome	FCN3
PM2549	TPM4	1	0.0166667	1.77815	Exposome (chemical)	Tricresyl phosphate	Proteome	TPM4
PM2654	C7	-1	0.0166667	1.77815	Exposome (chemical)	2,2',3,3',4,4',5-Heptachlorobiphenyl (PCB 170)	Proteome	C7
PM2654	LV321.1	1	0.0166667	1.77815	Exposome (chemical)	2,2',3,3',4,4',5-Heptachlorobiphenyl (PCB 170)	Proteome	LV321.1
PM2654	CNDP1	-1	0.0166667	1.77815	Exposome (chemical)	2,2',3,3',4,4',5-Heptachlorobiphenyl (PCB 170)	Proteome	CNDP1
PM3067	CEP290	-1	0.0166667	1.77815	Exposome (chemical)	Tetrabromobisphenol A diallyl ether	Proteome	CEP290
PM3067	CA1	-1	0.0166667	1.77815	Exposome (chemical)	Tetrabromobisphenol A diallyl ether	Proteome	CA1
PM3067	CST3	1	0.0166667	1.77815	Exposome (chemical)	Tetrabromobisphenol A diallyl ether	Proteome	CST3
PM3067	KVD33_4	-1	0.0166667	1.77815	Exposome (chemical)	Tetrabromobisphenol A diallyl ether	Proteome	KVD33_4
PM3067	KV320_2	-1	0.0166667	1.77815	Exposome (chemical)	Tetrabromobisphenol A diallyl ether	Proteome	KV320_2
PM3067	IGHG2	-1	0.0166667	1.77815	Exposome (chemical)	Tetrabromobisphenol A diallyl ether	Proteome	IGHG2
PM3067	C1QB	-1	0.0166667	1.77815	Exposome (chemical)	Tetrabromobisphenol A diallyl ether	Proteome	C1QB
PM3067	C1QC	-1	0.0166667	1.77815	Exposome (chemical)	Tetrabromobisphenol A diallyl ether	Proteome	C1QC
PM3067	PPBP	1	0.0166667	1.77815	Exposome (chemical)	Tetrabromobisphenol A diallyl ether	Proteome	PPBP
PM3067	HPX	1	0.0166667	1.77815	Exposome (chemical)	Tetrabromobisphenol A diallyl ether	Proteome	HPX
PM3067	PROC	1	0.0166667	1.77815	Exposome (chemical)	Tetrabromobisphenol A diallyl ether	Proteome	PROC
PM3067	VWF	1	0.0166667	1.77815	Exposome (chemical)	Tetrabromobisphenol A diallyl ether	Proteome	VWF
PM3067	KV311	-1	0.0166667	1.77815	Exposome (chemical)	Tetrabromobisphenol A diallyl ether	Proteome	KV311
PM3067	KV310	-1	0.0166667	1.77815	Exposome (chemical)	Tetrabromobisphenol A diallyl ether	Proteome	KV310
PM3067	APOD	-1	0.0166667	1.77815	Exposome (chemical)	Tetrabromobisphenol A diallyl ether	Proteome	APOD
PM3067	F7	-1	0.0166667	1.77815	Exposome (chemical)	Tetrabromobisphenol A diallyl ether	Proteome	F7
PM3067	HV102	-1	0.0166667	1.77815	Exposome (chemical)	Tetrabromobisphenol A diallyl ether	Proteome	HV102
PM3067	AZGP1	-1	0.0166667	1.77815	Exposome (chemical)	Tetrabromobisphenol A diallyl ether	Proteome	AZGP1
PM3067	ECM1	1	0.0166667	1.77815	Exposome (chemical)	Tetrabromobisphenol A diallyl ether	Proteome	ECM1
PM3067	VASN	1	0.0166667	1.77815	Exposome (chemical)	Tetrabromobisphenol A diallyl ether	Proteome	VASN
PM3067	TTN	1	0.0166667	1.77815	Exposome (chemical)	Tetrabromobisphenol A diallyl ether	Proteome	TTN
PM3067	PCYOX1	-1	0.0166667	1.77815	Exposome (chemical)	Tetrabromobisphenol A diallyl ether	Proteome	PCYOX1
PM3067	FAM161B	-1	0.0166667	1.77815	Exposome (chemical)	Tetrabromobisphenol A diallyl ether	Proteome	FAM161B
exposome_genus_Acidomyces	Creatinine._Ser.Plas	0.917663	0.0280085	1.55271	Exposome (biological)	genus_Acidomyces	Blood test	Creatinine._Ser.Plas
exposome_genus_Acinetobacter	Glucose._Ser.Plas	1	0.0166667	1.77815	Exposome (biological)	genus_Acinetobacter	Blood test	Glucose._Ser.Plas
exposome_genus_Acremonium	Hematocrit	0.974679	0.00481823	2.31711	Exposome (biological)	genus_Acremonium	Blood test	Hematocrit
exposome_genus_Acremonium	Platelet_count	-0.974679	0.00481823	2.31711	Exposome (biological)	genus_Acremonium	Blood test	Platelet_count
exposome_genus_Acremonium	RDW	0.974679	0.00481823	2.31711	Exposome (biological)	genus_Acremonium	Blood test	RDW
exposome_genus_Acremonium	Alk_P.TASE._Total._Ser.Plas	0.974679	0.00481823	2.31711	Exposome (biological)	genus_Acremonium	Blood test	Alk_P.TASE._Total._Ser.Plas
exposome_genus_Acremonium	Albumin._Ser.Plas	0.974679	0.00481823	2.31711	Exposome (biological)	genus_Acremonium	Blood test	Albumin._Ser.Plas
exposome_genus_Actinidia	HDL_Cholesterol	0.974679	0.00481823	2.31711	Exposome (biological)	genus_Actinidia	Blood test	HDL_Cholesterol
exposome_genus_Actinoplanes	Creatinine._Ser.Plas	0.917663	0.0280085	1.55271	Exposome (biological)	genus_Actinoplanes	Blood test	Creatinine._Ser.Plas
exposome_genus_Aegilops	NEUT._.	-0.974679	0.00481823	2.31711	Exposome (biological)	genus_Aegilops	Blood test	NEUT._.
exposome_genus_Aegilops	NEUT._ABS	-0.974679	0.00481823	2.31711	Exposome (biological)	genus_Aegilops	Blood test	NEUT._ABS
exposome_genus_Aegilops	Sodium._Ser.Plas	0.974679	0.00481823	2.31711	Exposome (biological)	genus_Aegilops	Blood test	Sodium._Ser.Plas
exposome_genus_Aliterella	Total_Bilirubin	0.917663	0.0280085	1.55271	Exposome (biological)	genus_Aliterella	Blood test	Total_Bilirubin
exposome_genus_Aliterella	Hemoglobin_A1c	0.917663	0.0280085	1.55271	Exposome (biological)	genus_Aliterella	Blood test	Hemoglobin_A1c
exposome_genus_Aliterella	LDL.HDL_Ratio	0.917663	0.0280085	1.55271	Exposome (biological)	genus_Aliterella	Blood test	LDL.HDL_Ratio
exposome_genus_Alkanindiges	Creatinine._Ser.Plas	0.917663	0.0280085	1.55271	Exposome (biological)	genus_Alkanindiges	Blood test	Creatinine._Ser.Plas
exposome_genus_Ananas	Total_Bilirubin	0.917663	0.0280085	1.55271	Exposome (biological)	genus_Ananas	Blood test	Total_Bilirubin
exposome_genus_Ananas	Hemoglobin_A1c	0.917663	0.0280085	1.55271	Exposome (biological)	genus_Ananas	Blood test	Hemoglobin_A1c
exposome_genus_Ananas	LDL.HDL_Ratio	0.917663	0.0280085	1.55271	Exposome (biological)	genus_Ananas	Blood test	LDL.HDL_Ratio
exposome_genus_Anthracocystis	Total_Bilirubin	0.917663	0.0280085	1.55271	Exposome (biological)	genus_Anthracocystis	Blood test	Total_Bilirubin
exposome_genus_Anthracocystis	Hemoglobin_A1c	0.917663	0.0280085	1.55271	Exposome (biological)	genus_Anthracocystis	Blood test	Hemoglobin_A1c
exposome_genus_Anthracocystis	LDL.HDL_Ratio	0.917663	0.0280085	1.55271	Exposome (biological)	genus_Anthracocystis	Blood test	LDL.HDL_Ratio
exposome_genus_Arcticibacter	MCH	0.974679	0.00481823	2.31711	Exposome (biological)	genus_Arcticibacter	Blood test	MCH
exposome_genus_Armillaria	BASO._.	0.974679	0.00481823	2.31711	Exposome (biological)	genus_Armillaria	Blood test	BASO._.
exposome_genus_Armillaria	LYM._ABS	-0.974679	0.00481823	2.31711	Exposome (biological)	genus_Armillaria	Blood test	LYM._ABS
exposome_genus_Armillaria	Urea_Nitrogen.Ser.Plas	-0.974679	0.00481823	2.31711	Exposome (biological)	genus_Armillaria	Blood test	Urea_Nitrogen.Ser.Plas
exposome_genus_Armillaria	Protein._Total._Ser.Plas	0.974679	0.00481823	2.31711	Exposome (biological)	genus_Armillaria	Blood test	Protein._Total._Ser.Plas
exposome_genus_Armillaria	Non.HDL_Chol._Calc	-0.974679	0.00481823	2.31711	Exposome (biological)	genus_Armillaria	Blood test	Non.HDL_Chol._Calc
exposome_genus_Armillaria	Cholesterol.HDL_Ratio	-0.974679	0.00481823	2.31711	Exposome (biological)	genus_Armillaria	Blood test	Cholesterol.HDL_Ratio
exposome_genus_Arthrobacter	Creatinine._Ser.Plas	0.917663	0.0280085	1.55271	Exposome (biological)	genus_Arthrobacter	Blood test	Creatinine._Ser.Plas
exposome_genus_Arthroderma	MCH	0.974679	0.00481823	2.31711	Exposome (biological)	genus_Arthroderma	Blood test	MCH
exposome_genus_Ascochyta	MCHC	-0.917663	0.0280085	1.55271	Exposome (biological)	genus_Ascochyta	Blood test	MCHC
exposome_genus_Ascochyta	Globulin	-0.917663	0.0280085	1.55271	Exposome (biological)	genus_Ascochyta	Blood test	Globulin
exposome_genus_Ascocoryne	Total_Bilirubin	0.917663	0.0280085	1.55271	Exposome (biological)	genus_Ascocoryne	Blood test	Total_Bilirubin
exposome_genus_Ascocoryne	Hemoglobin_A1c	0.917663	0.0280085	1.55271	Exposome (biological)	genus_Ascocoryne	Blood test	Hemoglobin_A1c
exposome_genus_Ascocoryne	LDL.HDL_Ratio	0.917663	0.0280085	1.55271	Exposome (biological)	genus_Ascocoryne	Blood test	LDL.HDL_Ratio
exposome_genus_Athelia	LDL_.Calculated.	-0.917663	0.0280085	1.55271	Exposome (biological)	genus_Athelia	Blood test	LDL_.Calculated.
exposome_genus_Aureobasidium	EOS._.	-1	0.0166667	1.77815	Exposome (biological)	genus_Aureobasidium	Blood test	EOS._.
exposome_genus_Aureobasidium	EOS._ABS	-1	0.0166667	1.77815	Exposome (biological)	genus_Aureobasidium	Blood test	EOS._ABS
exposome_genus_Aureobasidium	CO2._Ser.Plas	-1	0.0166667	1.77815	Exposome (biological)	genus_Aureobasidium	Blood test	CO2._Ser.Plas
exposome_genus_Auricularia	MCH	0.974679	0.00481823	2.31711	Exposome (biological)	genus_Auricularia	Blood test	MCH
exposome_genus_Bacillus	MCH	1	0.0166667	1.77815	Exposome (biological)	genus_Bacillus	Blood test	MCH
exposome_genus_Baeospora	MCHC	0.974679	0.00481823	2.31711	Exposome (biological)	genus_Baeospora	Blood test	MCHC
exposome_genus_Baeospora	Globulin	0.974679	0.00481823	2.31711	Exposome (biological)	genus_Baeospora	Blood test	Globulin
exposome_genus_Biomphalaria	Hemoglobin	0.974679	0.00481823	2.14102	Exposome (biological)	genus_Biomphalaria	Blood test	Hemoglobin
exposome_genus_Biomphalaria	RBC	0.974679	0.00481823	2.14102	Exposome (biological)	genus_Biomphalaria	Blood test	RBC
exposome_genus_Biomphalaria	Creatinine._Ser.Plas	0.921053	0.0263105	1.57987	Exposome (biological)	genus_Biomphalaria	Blood test	Creatinine._Ser.Plas
exposome_genus_Bipolaris	MCHC	-0.921053	0.0263105	1.57987	Exposome (biological)	genus_Bipolaris	Blood test	MCHC
exposome_genus_Bipolaris	Globulin	-0.921053	0.0263105	1.57987	Exposome (biological)	genus_Bipolaris	Blood test	Globulin
exposome_genus_Botrytis	Hemoglobin	0.974679	0.00481823	2.14102	Exposome (biological)	genus_Botrytis	Blood test	Hemoglobin
exposome_genus_Botrytis	RBC	0.974679	0.00481823	2.14102	Exposome (biological)	genus_Botrytis	Blood test	RBC
exposome_genus_Botrytis	Creatinine._Ser.Plas	0.921053	0.0263105	1.57987	Exposome (biological)	genus_Botrytis	Blood test	Creatinine._Ser.Plas
exposome_genus_Brassica	MONO._.	-0.974679	0.00481823	2.09526	Exposome (biological)	genus_Brassica	Blood test	MONO._.
exposome_genus_Brassica	Potassium._Ser.Plas	0.947368	0.0143795	1.74535	Exposome (biological)	genus_Brassica	Blood test	Potassium._Ser.Plas
exposome_genus_Brassica	Anion_Gap	-0.974679	0.00481823	2.09526	Exposome (biological)	genus_Brassica	Blood test	Anion_Gap
exposome_genus_Brassica	Cholesterol._Total	-0.974679	0.00481823	2.09526	Exposome (biological)	genus_Brassica	Blood test	Cholesterol._Total
exposome_genus_Brassica	LDL_.Calculated.	-0.921053	0.0263105	1.57987	Exposome (biological)	genus_Brassica	Blood test	LDL_.Calculated.
exposome_genus_Brevibacillus	Hemoglobin	0.974679	0.00481823	2.14102	Exposome (biological)	genus_Brevibacillus	Blood test	Hemoglobin
exposome_genus_Brevibacillus	RBC	0.974679	0.00481823	2.14102	Exposome (biological)	genus_Brevibacillus	Blood test	RBC
exposome_genus_Brevibacillus	Creatinine._Ser.Plas	0.921053	0.0263105	1.57987	Exposome (biological)	genus_Brevibacillus	Blood test	Creatinine._Ser.Plas
exposome_genus_Bulleromyces	Hematocrit	0.974679	0.00481823	2.31711	Exposome (biological)	genus_Bulleromyces	Blood test	Hematocrit
exposome_genus_Bulleromyces	Platelet_count	-0.974679	0.00481823	2.31711	Exposome (biological)	genus_Bulleromyces	Blood test	Platelet_count
exposome_genus_Bulleromyces	RDW	0.974679	0.00481823	2.31711	Exposome (biological)	genus_Bulleromyces	Blood test	RDW
exposome_genus_Bulleromyces	Alk_P.TASE._Total._Ser.Plas	0.974679	0.00481823	2.31711	Exposome (biological)	genus_Bulleromyces	Blood test	Alk_P.TASE._Total._Ser.Plas
exposome_genus_Bulleromyces	Albumin._Ser.Plas	0.974679	0.00481823	2.31711	Exposome (biological)	genus_Bulleromyces	Blood test	Albumin._Ser.Plas
exposome_genus_Burkholderia	Total_Bilirubin	0.917663	0.0280085	1.55271	Exposome (biological)	genus_Burkholderia	Blood test	Total_Bilirubin
exposome_genus_Burkholderia	Hemoglobin_A1c	0.917663	0.0280085	1.55271	Exposome (biological)	genus_Burkholderia	Blood test	Hemoglobin_A1c
exposome_genus_Burkholderia	LDL.HDL_Ratio	0.917663	0.0280085	1.55271	Exposome (biological)	genus_Burkholderia	Blood test	LDL.HDL_Ratio
exposome_genus_Byssochlamys	MCH	0.974679	0.00481823	2.31711	Exposome (biological)	genus_Byssochlamys	Blood test	MCH
exposome_genus_Calocera	Total_Bilirubin	0.921053	0.0263105	1.57987	Exposome (biological)	genus_Calocera	Blood test	Total_Bilirubin
exposome_genus_Calocera	Hemoglobin_A1c	0.921053	0.0263105	1.57987	Exposome (biological)	genus_Calocera	Blood test	Hemoglobin_A1c
exposome_genus_Calocera	LDL.HDL_Ratio	0.921053	0.0263105	1.57987	Exposome (biological)	genus_Calocera	Blood test	LDL.HDL_Ratio
exposome_genus_Canis	Hemoglobin	-1	0.0166667	1.77815	Exposome (biological)	genus_Canis	Blood test	Hemoglobin
exposome_genus_Canis	RBC	-1	0.0166667	1.77815	Exposome (biological)	genus_Canis	Blood test	RBC
exposome_genus_Canis	Creatinine._Ser.Plas	-0.974679	0.00481823	1.83999	Exposome (biological)	genus_Canis	Blood test	Creatinine._Ser.Plas
exposome_genus_Capnocytophaga	Hemoglobin	0.974679	0.00481823	2.14102	Exposome (biological)	genus_Capnocytophaga	Blood test	Hemoglobin
exposome_genus_Capnocytophaga	RBC	0.974679	0.00481823	2.14102	Exposome (biological)	genus_Capnocytophaga	Blood test	RBC
exposome_genus_Capnocytophaga	Creatinine._Ser.Plas	0.921053	0.0263105	1.57987	Exposome (biological)	genus_Capnocytophaga	Blood test	Creatinine._Ser.Plas
exposome_genus_Capronia	BASOS._ABS	-0.917663	0.0280085	1.55271	Exposome (biological)	genus_Capronia	Blood test	BASOS._ABS
exposome_genus_Cenococcum	Hematocrit	0.974679	0.00481823	2.31711	Exposome (biological)	genus_Cenococcum	Blood test	Hematocrit
exposome_genus_Cenococcum	Platelet_count	-0.974679	0.00481823	2.31711	Exposome (biological)	genus_Cenococcum	Blood test	Platelet_count
exposome_genus_Cenococcum	RDW	0.974679	0.00481823	2.31711	Exposome (biological)	genus_Cenococcum	Blood test	RDW
exposome_genus_Cenococcum	Alk_P.TASE._Total._Ser.Plas	0.974679	0.00481823	2.31711	Exposome (biological)	genus_Cenococcum	Blood test	Alk_P.TASE._Total._Ser.Plas
exposome_genus_Cenococcum	Albumin._Ser.Plas	0.974679	0.00481823	2.31711	Exposome (biological)	genus_Cenococcum	Blood test	Albumin._Ser.Plas
exposome_genus_Ceraceosorus	Hemoglobin	0.974679	0.00481823	2.14102	Exposome (biological)	genus_Ceraceosorus	Blood test	Hemoglobin
exposome_genus_Ceraceosorus	RBC	0.974679	0.00481823	2.14102	Exposome (biological)	genus_Ceraceosorus	Blood test	RBC
exposome_genus_Ceraceosorus	Creatinine._Ser.Plas	0.921053	0.0263105	1.57987	Exposome (biological)	genus_Ceraceosorus	Blood test	Creatinine._Ser.Plas
exposome_genus_Cercospora	Hematocrit	0.974679	0.00481823	2.31711	Exposome (biological)	genus_Cercospora	Blood test	Hematocrit
exposome_genus_Cercospora	Platelet_count	-0.974679	0.00481823	2.31711	Exposome (biological)	genus_Cercospora	Blood test	Platelet_count
exposome_genus_Cercospora	RDW	0.974679	0.00481823	2.31711	Exposome (biological)	genus_Cercospora	Blood test	RDW
exposome_genus_Cercospora	Alk_P.TASE._Total._Ser.Plas	0.974679	0.00481823	2.31711	Exposome (biological)	genus_Cercospora	Blood test	Alk_P.TASE._Total._Ser.Plas
exposome_genus_Cercospora	Albumin._Ser.Plas	0.974679	0.00481823	2.31711	Exposome (biological)	genus_Cercospora	Blood test	Albumin._Ser.Plas
exposome_genus_Chaetomium	Total_Bilirubin	0.921053	0.0263105	1.57987	Exposome (biological)	genus_Chaetomium	Blood test	Total_Bilirubin
exposome_genus_Chaetomium	Hemoglobin_A1c	0.921053	0.0263105	1.57987	Exposome (biological)	genus_Chaetomium	Blood test	Hemoglobin_A1c
exposome_genus_Chaetomium	LDL.HDL_Ratio	0.921053	0.0263105	1.57987	Exposome (biological)	genus_Chaetomium	Blood test	LDL.HDL_Ratio
exposome_genus_Chitinophaga	MCHC	-0.917663	0.0280085	1.55271	Exposome (biological)	genus_Chitinophaga	Blood test	MCHC
exposome_genus_Chitinophaga	Globulin	-0.917663	0.0280085	1.55271	Exposome (biological)	genus_Chitinophaga	Blood test	Globulin
exposome_genus_Chryseobacterium	BASOS._ABS	-0.974679	0.00481823	2.31711	Exposome (biological)	genus_Chryseobacterium	Blood test	BASOS._ABS
exposome_genus_Clonostachys	Creatinine._Ser.Plas	0.917663	0.0280085	1.55271	Exposome (biological)	genus_Clonostachys	Blood test	Creatinine._Ser.Plas
exposome_genus_Colletotrichum	Hematocrit	0.974679	0.00481823	2.31711	Exposome (biological)	genus_Colletotrichum	Blood test	Hematocrit
exposome_genus_Colletotrichum	Platelet_count	-0.974679	0.00481823	2.31711	Exposome (biological)	genus_Colletotrichum	Blood test	Platelet_count
exposome_genus_Colletotrichum	RDW	0.974679	0.00481823	2.31711	Exposome (biological)	genus_Colletotrichum	Blood test	RDW
exposome_genus_Colletotrichum	Alk_P.TASE._Total._Ser.Plas	0.974679	0.00481823	2.31711	Exposome (biological)	genus_Colletotrichum	Blood test	Alk_P.TASE._Total._Ser.Plas
exposome_genus_Colletotrichum	Albumin._Ser.Plas	0.974679	0.00481823	2.31711	Exposome (biological)	genus_Colletotrichum	Blood test	Albumin._Ser.Plas
exposome_genus_Coniophora	MCHC	0.974679	0.00481823	2.31711	Exposome (biological)	genus_Coniophora	Blood test	MCHC
exposome_genus_Coniophora	Globulin	0.974679	0.00481823	2.31711	Exposome (biological)	genus_Coniophora	Blood test	Globulin
exposome_genus_Coniosporium	EOS._.	-1	0.0166667	1.77815	Exposome (biological)	genus_Coniosporium	Blood test	EOS._.
exposome_genus_Coniosporium	EOS._ABS	-1	0.0166667	1.77815	Exposome (biological)	genus_Coniosporium	Blood test	EOS._ABS
exposome_genus_Coniosporium	CO2._Ser.Plas	-1	0.0166667	1.77815	Exposome (biological)	genus_Coniosporium	Blood test	CO2._Ser.Plas
exposome_genus_Cordyceps	MCH	0.974679	0.00481823	2.31711	Exposome (biological)	genus_Cordyceps	Blood test	MCH
exposome_genus_Cryomyces	Creatinine._Ser.Plas	0.917663	0.0280085	1.55271	Exposome (biological)	genus_Cryomyces	Blood test	Creatinine._Ser.Plas
exposome_genus_Curvularia	LYM._.	0.974679	0.00481823	2.01608	Exposome (biological)	genus_Curvularia	Blood test	LYM._.
exposome_genus_Curvularia	BASOS._ABS	-0.921053	0.0263105	1.57987	Exposome (biological)	genus_Curvularia	Blood test	BASOS._ABS
exposome_genus_Cyphellophora	Creatinine._Ser.Plas	0.917663	0.0280085	1.55271	Exposome (biological)	genus_Cyphellophora	Blood test	Creatinine._Ser.Plas
exposome_genus_Cystobasidiopsis	Hemoglobin	0.974679	0.00481823	2.14102	Exposome (biological)	genus_Cystobasidiopsis	Blood test	Hemoglobin
exposome_genus_Cystobasidiopsis	RBC	0.974679	0.00481823	2.14102	Exposome (biological)	genus_Cystobasidiopsis	Blood test	RBC
exposome_genus_Cystobasidiopsis	Creatinine._Ser.Plas	0.921053	0.0263105	1.57987	Exposome (biological)	genus_Cystobasidiopsis	Blood test	Creatinine._Ser.Plas
exposome_genus_Cystobasidium	Hemoglobin	0.974679	0.00481823	2.14102	Exposome (biological)	genus_Cystobasidium	Blood test	Hemoglobin
exposome_genus_Cystobasidium	RBC	0.974679	0.00481823	2.14102	Exposome (biological)	genus_Cystobasidium	Blood test	RBC
exposome_genus_Cystobasidium	Creatinine._Ser.Plas	0.921053	0.0263105	1.57987	Exposome (biological)	genus_Cystobasidium	Blood test	Creatinine._Ser.Plas
exposome_genus_Daedalea	Glucose._Ser.Plas	-1	0.0166667	1.77815	Exposome (biological)	genus_Daedalea	Blood test	Glucose._Ser.Plas
exposome_genus_Dendrobium	Creatinine._Ser.Plas	0.917663	0.0280085	1.55271	Exposome (biological)	genus_Dendrobium	Blood test	Creatinine._Ser.Plas
exposome_genus_Desmospora	Creatinine._Ser.Plas	0.917663	0.0280085	1.55271	Exposome (biological)	genus_Desmospora	Blood test	Creatinine._Ser.Plas
exposome_genus_Desulfosporosinus	Potassium._Ser.Plas	-0.917663	0.0280085	1.55271	Exposome (biological)	genus_Desulfosporosinus	Blood test	Potassium._Ser.Plas
exposome_genus_Diaporthe	Hemoglobin	1	0.0166667	1.77815	Exposome (biological)	genus_Diaporthe	Blood test	Hemoglobin
exposome_genus_Diaporthe	RBC	1	0.0166667	1.77815	Exposome (biological)	genus_Diaporthe	Blood test	RBC
exposome_genus_Diaporthe	Creatinine._Ser.Plas	0.974679	0.00481823	1.83999	Exposome (biological)	genus_Diaporthe	Blood test	Creatinine._Ser.Plas
exposome_genus_Dichomitus	Glucose._Ser.Plas	-1	0.0166667	1.77815	Exposome (biological)	genus_Dichomitus	Blood test	Glucose._Ser.Plas
exposome_genus_Dioszegia	Creatinine._Ser.Plas	0.917663	0.0280085	1.55271	Exposome (biological)	genus_Dioszegia	Blood test	Creatinine._Ser.Plas
exposome_genus_Diplodia	Hematocrit	0.974679	0.00481823	2.31711	Exposome (biological)	genus_Diplodia	Blood test	Hematocrit
exposome_genus_Diplodia	Platelet_count	-0.974679	0.00481823	2.31711	Exposome (biological)	genus_Diplodia	Blood test	Platelet_count
exposome_genus_Diplodia	RDW	0.974679	0.00481823	2.31711	Exposome (biological)	genus_Diplodia	Blood test	RDW
exposome_genus_Diplodia	Alk_P.TASE._Total._Ser.Plas	0.974679	0.00481823	2.31711	Exposome (biological)	genus_Diplodia	Blood test	Alk_P.TASE._Total._Ser.Plas
exposome_genus_Diplodia	Albumin._Ser.Plas	0.974679	0.00481823	2.31711	Exposome (biological)	genus_Diplodia	Blood test	Albumin._Ser.Plas
exposome_genus_Dolosigranulum	Total_Bilirubin	0.917663	0.0280085	1.55271	Exposome (biological)	genus_Dolosigranulum	Blood test	Total_Bilirubin
exposome_genus_Dolosigranulum	Hemoglobin_A1c	0.917663	0.0280085	1.55271	Exposome (biological)	genus_Dolosigranulum	Blood test	Hemoglobin_A1c
exposome_genus_Dolosigranulum	LDL.HDL_Ratio	0.917663	0.0280085	1.55271	Exposome (biological)	genus_Dolosigranulum	Blood test	LDL.HDL_Ratio
exposome_genus_Dothistroma	Hematocrit	0.974679	0.00481823	2.31711	Exposome (biological)	genus_Dothistroma	Blood test	Hematocrit
exposome_genus_Dothistroma	Platelet_count	-0.974679	0.00481823	2.31711	Exposome (biological)	genus_Dothistroma	Blood test	Platelet_count
exposome_genus_Dothistroma	RDW	0.974679	0.00481823	2.31711	Exposome (biological)	genus_Dothistroma	Blood test	RDW
exposome_genus_Dothistroma	Alk_P.TASE._Total._Ser.Plas	0.974679	0.00481823	2.31711	Exposome (biological)	genus_Dothistroma	Blood test	Alk_P.TASE._Total._Ser.Plas
exposome_genus_Dothistroma	Albumin._Ser.Plas	0.974679	0.00481823	2.31711	Exposome (biological)	genus_Dothistroma	Blood test	Albumin._Ser.Plas
exposome_genus_Drechslerella	Total_Bilirubin	0.917663	0.0280085	1.55271	Exposome (biological)	genus_Drechslerella	Blood test	Total_Bilirubin
exposome_genus_Drechslerella	Hemoglobin_A1c	0.917663	0.0280085	1.55271	Exposome (biological)	genus_Drechslerella	Blood test	Hemoglobin_A1c
exposome_genus_Drechslerella	LDL.HDL_Ratio	0.917663	0.0280085	1.55271	Exposome (biological)	genus_Drechslerella	Blood test	LDL.HDL_Ratio
exposome_genus_Elaeis	Potassium._Ser.Plas	-0.917663	0.0280085	1.55271	Exposome (biological)	genus_Elaeis	Blood test	Potassium._Ser.Plas
exposome_genus_Emmonsia	EOS._.	-0.974679	0.00481823	2.31711	Exposome (biological)	genus_Emmonsia	Blood test	EOS._.
exposome_genus_Emmonsia	EOS._ABS	-0.974679	0.00481823	2.31711	Exposome (biological)	genus_Emmonsia	Blood test	EOS._ABS
exposome_genus_Emmonsia	Chloride._Ser.Plas	-0.974679	0.00481823	2.31711	Exposome (biological)	genus_Emmonsia	Blood test	Chloride._Ser.Plas
exposome_genus_Emmonsia	CO2._Ser.Plas	-0.974679	0.00481823	2.31711	Exposome (biological)	genus_Emmonsia	Blood test	CO2._Ser.Plas
exposome_genus_Endocarpon	Creatinine._Ser.Plas	0.917663	0.0280085	1.55271	Exposome (biological)	genus_Endocarpon	Blood test	Creatinine._Ser.Plas
exposome_genus_Enterococcus	MCH	0.974679	0.00481823	2.31711	Exposome (biological)	genus_Enterococcus	Blood test	MCH
exposome_genus_Epichloe	MCH	0.974679	0.00481823	2.31711	Exposome (biological)	genus_Epichloe	Blood test	MCH
exposome_genus_Erythrobasidium	Creatinine._Ser.Plas	0.974679	0.00481823	1.83999	Exposome (biological)	genus_Erythrobasidium	Blood test	Creatinine._Ser.Plas
exposome_genus_Erythrobasidium	AST_.SGOT.._Ser.Plas	-1	0.0166667	1.77815	Exposome (biological)	genus_Erythrobasidium	Blood test	AST_.SGOT.._Ser.Plas
exposome_genus_Erythrobasidium	ALT_.SGPT.._Ser.Plas	-1	0.0166667	1.77815	Exposome (biological)	genus_Erythrobasidium	Blood test	ALT_.SGPT.._Ser.Plas
exposome_genus_Escherichia	Total_Bilirubin	0.917663	0.0280085	1.55271	Exposome (biological)	genus_Escherichia	Blood test	Total_Bilirubin
exposome_genus_Escherichia	Hemoglobin_A1c	0.917663	0.0280085	1.55271	Exposome (biological)	genus_Escherichia	Blood test	Hemoglobin_A1c
exposome_genus_Escherichia	LDL.HDL_Ratio	0.917663	0.0280085	1.55271	Exposome (biological)	genus_Escherichia	Blood test	LDL.HDL_Ratio
exposome_genus_Eutypa	Hemoglobin	0.974679	0.00481823	2.14102	Exposome (biological)	genus_Eutypa	Blood test	Hemoglobin
exposome_genus_Eutypa	RBC	0.974679	0.00481823	2.14102	Exposome (biological)	genus_Eutypa	Blood test	RBC
exposome_genus_Eutypa	Creatinine._Ser.Plas	0.921053	0.0263105	1.57987	Exposome (biological)	genus_Eutypa	Blood test	Creatinine._Ser.Plas
exposome_genus_Exidia	Calcium._Ser.Plas	1	0.0166667	1.77815	Exposome (biological)	genus_Exidia	Blood test	Calcium._Ser.Plas
exposome_genus_Exophiala	eGFR	-0.948683	0.0138468	1.85865	Exposome (biological)	genus_Exophiala	Blood test	eGFR
exposome_genus_Exophiala	LDL_.Calculated.	0.974679	0.00481823	2.01608	Exposome (biological)	genus_Exophiala	Blood test	LDL_.Calculated.
exposome_genus_Fibrella	Total_Bilirubin	0.917663	0.0280085	1.55271	Exposome (biological)	genus_Fibrella	Blood test	Total_Bilirubin
exposome_genus_Fibrella	Hemoglobin_A1c	0.917663	0.0280085	1.55271	Exposome (biological)	genus_Fibrella	Blood test	Hemoglobin_A1c
exposome_genus_Fibrella	LDL.HDL_Ratio	0.917663	0.0280085	1.55271	Exposome (biological)	genus_Fibrella	Blood test	LDL.HDL_Ratio
exposome_genus_Filobasidiella	Hematocrit	0.974679	0.00481823	2.31711	Exposome (biological)	genus_Filobasidiella	Blood test	Hematocrit
exposome_genus_Filobasidiella	Platelet_count	-0.974679	0.00481823	2.31711	Exposome (biological)	genus_Filobasidiella	Blood test	Platelet_count
exposome_genus_Filobasidiella	RDW	0.974679	0.00481823	2.31711	Exposome (biological)	genus_Filobasidiella	Blood test	RDW
exposome_genus_Filobasidiella	Alk_P.TASE._Total._Ser.Plas	0.974679	0.00481823	2.31711	Exposome (biological)	genus_Filobasidiella	Blood test	Alk_P.TASE._Total._Ser.Plas
exposome_genus_Filobasidiella	Albumin._Ser.Plas	0.974679	0.00481823	2.31711	Exposome (biological)	genus_Filobasidiella	Blood test	Albumin._Ser.Plas
exposome_genus_Filobasidium	Creatinine._Ser.Plas	0.917663	0.0280085	1.55271	Exposome (biological)	genus_Filobasidium	Blood test	Creatinine._Ser.Plas
exposome_genus_Flammulina	BASO._.	0.974679	0.00481823	2.31711	Exposome (biological)	genus_Flammulina	Blood test	BASO._.
exposome_genus_Flammulina	LYM._ABS	-0.974679	0.00481823	2.31711	Exposome (biological)	genus_Flammulina	Blood test	LYM._ABS
exposome_genus_Flammulina	Urea_Nitrogen.Ser.Plas	-0.974679	0.00481823	2.31711	Exposome (biological)	genus_Flammulina	Blood test	Urea_Nitrogen.Ser.Plas
exposome_genus_Flammulina	Protein._Total._Ser.Plas	0.974679	0.00481823	2.31711	Exposome (biological)	genus_Flammulina	Blood test	Protein._Total._Ser.Plas
exposome_genus_Flammulina	Non.HDL_Chol._Calc	-0.974679	0.00481823	2.31711	Exposome (biological)	genus_Flammulina	Blood test	Non.HDL_Chol._Calc
exposome_genus_Flammulina	Cholesterol.HDL_Ratio	-0.974679	0.00481823	2.31711	Exposome (biological)	genus_Flammulina	Blood test	Cholesterol.HDL_Ratio
exposome_genus_Fomitopsis	Glucose._Ser.Plas	-1	0.0166667	1.77815	Exposome (biological)	genus_Fomitopsis	Blood test	Glucose._Ser.Plas
exposome_genus_Fragaria	NEUT._.	0.974679	0.00481823	2.31711	Exposome (biological)	genus_Fragaria	Blood test	NEUT._.
exposome_genus_Fragaria	NEUT._ABS	0.974679	0.00481823	2.31711	Exposome (biological)	genus_Fragaria	Blood test	NEUT._ABS
exposome_genus_Fragaria	Sodium._Ser.Plas	-0.974679	0.00481823	2.31711	Exposome (biological)	genus_Fragaria	Blood test	Sodium._Ser.Plas
exposome_genus_Ganoderma	EOS._.	0.974679	0.00481823	2.31711	Exposome (biological)	genus_Ganoderma	Blood test	EOS._.
exposome_genus_Ganoderma	EOS._ABS	0.974679	0.00481823	2.31711	Exposome (biological)	genus_Ganoderma	Blood test	EOS._ABS
exposome_genus_Ganoderma	CO2._Ser.Plas	0.974679	0.00481823	2.31711	Exposome (biological)	genus_Ganoderma	Blood test	CO2._Ser.Plas
exposome_genus_Geotrichum	Hematocrit	0.974679	0.00481823	2.31711	Exposome (biological)	genus_Geotrichum	Blood test	Hematocrit
exposome_genus_Geotrichum	Platelet_count	-0.974679	0.00481823	2.31711	Exposome (biological)	genus_Geotrichum	Blood test	Platelet_count
exposome_genus_Geotrichum	RDW	0.974679	0.00481823	2.31711	Exposome (biological)	genus_Geotrichum	Blood test	RDW
exposome_genus_Geotrichum	Alk_P.TASE._Total._Ser.Plas	0.974679	0.00481823	2.31711	Exposome (biological)	genus_Geotrichum	Blood test	Alk_P.TASE._Total._Ser.Plas
exposome_genus_Geotrichum	Albumin._Ser.Plas	0.974679	0.00481823	2.31711	Exposome (biological)	genus_Geotrichum	Blood test	Albumin._Ser.Plas
exposome_genus_Gloeophyllum	BASO._.	1	0.0166667	1.77815	Exposome (biological)	genus_Gloeophyllum	Blood test	BASO._.
exposome_genus_Glonium	EOS._.	-1	0.0166667	1.77815	Exposome (biological)	genus_Glonium	Blood test	EOS._.
exposome_genus_Glonium	EOS._ABS	-1	0.0166667	1.77815	Exposome (biological)	genus_Glonium	Blood test	EOS._ABS
exposome_genus_Glonium	CO2._Ser.Plas	-1	0.0166667	1.77815	Exposome (biological)	genus_Glonium	Blood test	CO2._Ser.Plas
exposome_genus_Gongronella	MCH	0.974679	0.00481823	2.31711	Exposome (biological)	genus_Gongronella	Blood test	MCH
exposome_genus_Gossypium	Creatinine._Ser.Plas	0.917663	0.0280085	1.55271	Exposome (biological)	genus_Gossypium	Blood test	Creatinine._Ser.Plas
exposome_genus_Graphilbum	Creatinine._Ser.Plas	0.917663	0.0280085	1.55271	Exposome (biological)	genus_Graphilbum	Blood test	Creatinine._Ser.Plas
exposome_genus_Grifola	Glucose._Ser.Plas	-1	0.0166667	1.77815	Exposome (biological)	genus_Grifola	Blood test	Glucose._Ser.Plas
exposome_genus_Gyalolechia	Creatinine._Ser.Plas	0.917663	0.0280085	1.55271	Exposome (biological)	genus_Gyalolechia	Blood test	Creatinine._Ser.Plas
exposome_genus_Haloferula	Creatinine._Ser.Plas	0.917663	0.0280085	1.55271	Exposome (biological)	genus_Haloferula	Blood test	Creatinine._Ser.Plas
exposome_genus_Hassallia	Potassium._Ser.Plas	-0.917663	0.0280085	1.55271	Exposome (biological)	genus_Hassallia	Blood test	Potassium._Ser.Plas
exposome_genus_Hebeloma	Total_Bilirubin	0.917663	0.0280085	1.55271	Exposome (biological)	genus_Hebeloma	Blood test	Total_Bilirubin
exposome_genus_Hebeloma	Hemoglobin_A1c	0.917663	0.0280085	1.55271	Exposome (biological)	genus_Hebeloma	Blood test	Hemoglobin_A1c
exposome_genus_Hebeloma	LDL.HDL_Ratio	0.917663	0.0280085	1.55271	Exposome (biological)	genus_Hebeloma	Blood test	LDL.HDL_Ratio
exposome_genus_Helminthosporium	HDL_Cholesterol	0.974679	0.00481823	2.31711	Exposome (biological)	genus_Helminthosporium	Blood test	HDL_Cholesterol
exposome_genus_Heterobasidion	Glucose._Ser.Plas	-0.974679	0.00481823	2.31711	Exposome (biological)	genus_Heterobasidion	Blood test	Glucose._Ser.Plas
exposome_genus_Heterobasidion	Calcium._Ser.Plas	0.974679	0.00481823	2.31711	Exposome (biological)	genus_Heterobasidion	Blood test	Calcium._Ser.Plas
exposome_genus_Hibiscus	Total_Bilirubin	0.917663	0.0280085	1.55271	Exposome (biological)	genus_Hibiscus	Blood test	Total_Bilirubin
exposome_genus_Hibiscus	Hemoglobin_A1c	0.917663	0.0280085	1.55271	Exposome (biological)	genus_Hibiscus	Blood test	Hemoglobin_A1c
exposome_genus_Hibiscus	LDL.HDL_Ratio	0.917663	0.0280085	1.55271	Exposome (biological)	genus_Hibiscus	Blood test	LDL.HDL_Ratio
exposome_genus_Hirsutella	MCHC	-0.921053	0.0263105	1.57987	Exposome (biological)	genus_Hirsutella	Blood test	MCHC
exposome_genus_Hirsutella	Globulin	-0.921053	0.0263105	1.57987	Exposome (biological)	genus_Hirsutella	Blood test	Globulin
exposome_genus_Hordeum	HDL_Cholesterol	-1	0.0166667	1.77815	Exposome (biological)	genus_Hordeum	Blood test	HDL_Cholesterol
exposome_genus_Humulus	MCV	1	0.0166667	1.77815	Exposome (biological)	genus_Humulus	Blood test	MCV
exposome_genus_Hymenobacter	Chloride._Ser.Plas	-1	0.0166667	1.77815	Exposome (biological)	genus_Hymenobacter	Blood test	Chloride._Ser.Plas
exposome_genus_Hymenoscyphus	MCH	1	0.0166667	1.77815	Exposome (biological)	genus_Hymenoscyphus	Blood test	MCH
exposome_genus_Hypsizygus	HDL_Cholesterol	-1	0.0166667	1.77815	Exposome (biological)	genus_Hypsizygus	Blood test	HDL_Cholesterol
exposome_genus_Hysterium	Hemoglobin	0.974679	0.00481823	2.14102	Exposome (biological)	genus_Hysterium	Blood test	Hemoglobin
exposome_genus_Hysterium	RBC	0.974679	0.00481823	2.14102	Exposome (biological)	genus_Hysterium	Blood test	RBC
exposome_genus_Hysterium	Creatinine._Ser.Plas	0.921053	0.0263105	1.57987	Exposome (biological)	genus_Hysterium	Blood test	Creatinine._Ser.Plas
exposome_genus_Jaapia	MCH	1	0.0166667	1.77815	Exposome (biological)	genus_Jaapia	Blood test	MCH
exposome_genus_Juglans	Creatinine._Ser.Plas	0.921053	0.0263105	1.57987	Exposome (biological)	genus_Juglans	Blood test	Creatinine._Ser.Plas
exposome_genus_Juglans	AST_.SGOT.._Ser.Plas	-0.974679	0.00481823	2.14102	Exposome (biological)	genus_Juglans	Blood test	AST_.SGOT.._Ser.Plas
exposome_genus_Juglans	ALT_.SGPT.._Ser.Plas	-0.974679	0.00481823	2.14102	Exposome (biological)	genus_Juglans	Blood test	ALT_.SGPT.._Ser.Plas
exposome_genus_Kalmanozyma	BASOS._ABS	-0.917663	0.0280085	1.55271	Exposome (biological)	genus_Kalmanozyma	Blood test	BASOS._ABS
exposome_genus_Klebsiella	Creatinine._Ser.Plas	0.917663	0.0280085	1.55271	Exposome (biological)	genus_Klebsiella	Blood test	Creatinine._Ser.Plas
exposome_genus_Kwoniella	Creatinine._Ser.Plas	0.917663	0.0280085	1.55271	Exposome (biological)	genus_Kwoniella	Blood test	Creatinine._Ser.Plas
exposome_genus_Lactobacillus	Creatinine._Ser.Plas	0.917663	0.0280085	1.55271	Exposome (biological)	genus_Lactobacillus	Blood test	Creatinine._Ser.Plas
exposome_genus_Lasallia	Creatinine._Ser.Plas	0.917663	0.0280085	1.55271	Exposome (biological)	genus_Lasallia	Blood test	Creatinine._Ser.Plas
exposome_genus_Laurentiella	Potassium._Ser.Plas	-0.917663	0.0280085	1.55271	Exposome (biological)	genus_Laurentiella	Blood test	Potassium._Ser.Plas
exposome_genus_Lecanosticta	Hematocrit	0.974679	0.00481823	2.31711	Exposome (biological)	genus_Lecanosticta	Blood test	Hematocrit
exposome_genus_Lecanosticta	Platelet_count	-0.974679	0.00481823	2.31711	Exposome (biological)	genus_Lecanosticta	Blood test	Platelet_count
exposome_genus_Lecanosticta	RDW	0.974679	0.00481823	2.31711	Exposome (biological)	genus_Lecanosticta	Blood test	RDW
exposome_genus_Lecanosticta	Alk_P.TASE._Total._Ser.Plas	0.974679	0.00481823	2.31711	Exposome (biological)	genus_Lecanosticta	Blood test	Alk_P.TASE._Total._Ser.Plas
exposome_genus_Lecanosticta	Albumin._Ser.Plas	0.974679	0.00481823	2.31711	Exposome (biological)	genus_Lecanosticta	Blood test	Albumin._Ser.Plas
exposome_genus_Legionella	Hemoglobin	1	0.0166667	1.77815	Exposome (biological)	genus_Legionella	Blood test	Hemoglobin
exposome_genus_Legionella	RBC	1	0.0166667	1.77815	Exposome (biological)	genus_Legionella	Blood test	RBC
exposome_genus_Legionella	Creatinine._Ser.Plas	0.974679	0.00481823	1.83999	Exposome (biological)	genus_Legionella	Blood test	Creatinine._Ser.Plas
exposome_genus_Lepidopterella	Hematocrit	0.974679	0.00481823	2.31711	Exposome (biological)	genus_Lepidopterella	Blood test	Hematocrit
exposome_genus_Lepidopterella	Platelet_count	-0.974679	0.00481823	2.31711	Exposome (biological)	genus_Lepidopterella	Blood test	Platelet_count
exposome_genus_Lepidopterella	RDW	0.974679	0.00481823	2.31711	Exposome (biological)	genus_Lepidopterella	Blood test	RDW
exposome_genus_Lepidopterella	Alk_P.TASE._Total._Ser.Plas	0.974679	0.00481823	2.31711	Exposome (biological)	genus_Lepidopterella	Blood test	Alk_P.TASE._Total._Ser.Plas
exposome_genus_Lepidopterella	Albumin._Ser.Plas	0.974679	0.00481823	2.31711	Exposome (biological)	genus_Lepidopterella	Blood test	Albumin._Ser.Plas
exposome_genus_Leptographium	Hemoglobin	0.974679	0.00481823	2.14102	Exposome (biological)	genus_Leptographium	Blood test	Hemoglobin
exposome_genus_Leptographium	RBC	0.974679	0.00481823	2.14102	Exposome (biological)	genus_Leptographium	Blood test	RBC
exposome_genus_Leptographium	Creatinine._Ser.Plas	0.921053	0.0263105	1.57987	Exposome (biological)	genus_Leptographium	Blood test	Creatinine._Ser.Plas
exposome_genus_Leptosphaeria	Creatinine._Ser.Plas	0.917663	0.0280085	1.55271	Exposome (biological)	genus_Leptosphaeria	Blood test	Creatinine._Ser.Plas
exposome_genus_Leptoxyphium	Hematocrit	0.974679	0.00481823	2.31711	Exposome (biological)	genus_Leptoxyphium	Blood test	Hematocrit
exposome_genus_Leptoxyphium	Platelet_count	-0.974679	0.00481823	2.31711	Exposome (biological)	genus_Leptoxyphium	Blood test	Platelet_count
exposome_genus_Leptoxyphium	RDW	0.974679	0.00481823	2.31711	Exposome (biological)	genus_Leptoxyphium	Blood test	RDW
exposome_genus_Leptoxyphium	Alk_P.TASE._Total._Ser.Plas	0.974679	0.00481823	2.31711	Exposome (biological)	genus_Leptoxyphium	Blood test	Alk_P.TASE._Total._Ser.Plas
exposome_genus_Leptoxyphium	Albumin._Ser.Plas	0.974679	0.00481823	2.31711	Exposome (biological)	genus_Leptoxyphium	Blood test	Albumin._Ser.Plas
exposome_genus_Leucoagaricus	BASO._.	1	0.0166667	1.77815	Exposome (biological)	genus_Leucoagaricus	Blood test	BASO._.
exposome_genus_Leucosporidium	Hematocrit	0.974679	0.00481823	2.31711	Exposome (biological)	genus_Leucosporidium	Blood test	Hematocrit
exposome_genus_Leucosporidium	Platelet_count	-0.974679	0.00481823	2.31711	Exposome (biological)	genus_Leucosporidium	Blood test	Platelet_count
exposome_genus_Leucosporidium	RDW	0.974679	0.00481823	2.31711	Exposome (biological)	genus_Leucosporidium	Blood test	RDW
exposome_genus_Leucosporidium	Alk_P.TASE._Total._Ser.Plas	0.974679	0.00481823	2.31711	Exposome (biological)	genus_Leucosporidium	Blood test	Alk_P.TASE._Total._Ser.Plas
exposome_genus_Leucosporidium	Albumin._Ser.Plas	0.974679	0.00481823	2.31711	Exposome (biological)	genus_Leucosporidium	Blood test	Albumin._Ser.Plas
exposome_genus_Lotus	Total_Bilirubin	0.917663	0.0280085	1.55271	Exposome (biological)	genus_Lotus	Blood test	Total_Bilirubin
exposome_genus_Lotus	Hemoglobin_A1c	0.917663	0.0280085	1.55271	Exposome (biological)	genus_Lotus	Blood test	Hemoglobin_A1c
exposome_genus_Lotus	LDL.HDL_Ratio	0.917663	0.0280085	1.55271	Exposome (biological)	genus_Lotus	Blood test	LDL.HDL_Ratio
exposome_genus_Madurella	Hematocrit	0.974679	0.00481823	2.31711	Exposome (biological)	genus_Madurella	Blood test	Hematocrit
exposome_genus_Madurella	Platelet_count	-0.974679	0.00481823	2.31711	Exposome (biological)	genus_Madurella	Blood test	Platelet_count
exposome_genus_Madurella	RDW	0.974679	0.00481823	2.31711	Exposome (biological)	genus_Madurella	Blood test	RDW
exposome_genus_Madurella	Alk_P.TASE._Total._Ser.Plas	0.974679	0.00481823	2.31711	Exposome (biological)	genus_Madurella	Blood test	Alk_P.TASE._Total._Ser.Plas
exposome_genus_Madurella	Albumin._Ser.Plas	0.974679	0.00481823	2.31711	Exposome (biological)	genus_Madurella	Blood test	Albumin._Ser.Plas
exposome_genus_Magnaporthe	Creatinine._Ser.Plas	0.917663	0.0280085	1.55271	Exposome (biological)	genus_Magnaporthe	Blood test	Creatinine._Ser.Plas
exposome_genus_Magnaporthiopsis	Creatinine._Ser.Plas	0.917663	0.0280085	1.55271	Exposome (biological)	genus_Magnaporthiopsis	Blood test	Creatinine._Ser.Plas
exposome_genus_Marchantia	Total_Bilirubin	0.917663	0.0280085	1.55271	Exposome (biological)	genus_Marchantia	Blood test	Total_Bilirubin
exposome_genus_Marchantia	Hemoglobin_A1c	0.917663	0.0280085	1.55271	Exposome (biological)	genus_Marchantia	Blood test	Hemoglobin_A1c
exposome_genus_Marchantia	LDL.HDL_Ratio	0.917663	0.0280085	1.55271	Exposome (biological)	genus_Marchantia	Blood test	LDL.HDL_Ratio
exposome_genus_Massilia	MONO._ABS	1	0.0166667	1.77815	Exposome (biological)	genus_Massilia	Blood test	MONO._ABS
exposome_genus_Massilia	Potassium._Ser.Plas	-0.974679	0.00481823	1.83999	Exposome (biological)	genus_Massilia	Blood test	Potassium._Ser.Plas
exposome_genus_Massilia	eGFR	-0.948683	0.0138468	1.77815	Exposome (biological)	genus_Massilia	Blood test	eGFR
exposome_genus_Melampsora	Hemoglobin	0.974679	0.00481823	2.14102	Exposome (biological)	genus_Melampsora	Blood test	Hemoglobin
exposome_genus_Melampsora	RBC	0.974679	0.00481823	2.14102	Exposome (biological)	genus_Melampsora	Blood test	RBC
exposome_genus_Melampsora	Creatinine._Ser.Plas	0.921053	0.0263105	1.57987	Exposome (biological)	genus_Melampsora	Blood test	Creatinine._Ser.Plas
exposome_genus_Microdochium	WBC	-0.974679	0.00481823	2.31711	Exposome (biological)	genus_Microdochium	Blood test	WBC
exposome_genus_Microdochium	MCV	0.974679	0.00481823	2.31711	Exposome (biological)	genus_Microdochium	Blood test	MCV
exposome_genus_Microvirga	Hematocrit	0.974679	0.00481823	2.31711	Exposome (biological)	genus_Microvirga	Blood test	Hematocrit
exposome_genus_Microvirga	Platelet_count	-0.974679	0.00481823	2.31711	Exposome (biological)	genus_Microvirga	Blood test	Platelet_count
exposome_genus_Microvirga	RDW	0.974679	0.00481823	2.31711	Exposome (biological)	genus_Microvirga	Blood test	RDW
exposome_genus_Microvirga	Alk_P.TASE._Total._Ser.Plas	0.974679	0.00481823	2.31711	Exposome (biological)	genus_Microvirga	Blood test	Alk_P.TASE._Total._Ser.Plas
exposome_genus_Microvirga	Albumin._Ser.Plas	0.974679	0.00481823	2.31711	Exposome (biological)	genus_Microvirga	Blood test	Albumin._Ser.Plas
exposome_genus_Muricauda	BASOS._ABS	-0.917663	0.0280085	1.55271	Exposome (biological)	genus_Muricauda	Blood test	BASOS._ABS
exposome_genus_Myceliophthora	Creatinine._Ser.Plas	0.917663	0.0280085	1.55271	Exposome (biological)	genus_Myceliophthora	Blood test	Creatinine._Ser.Plas
exposome_genus_Mycena	MCH	0.974679	0.00481823	2.31711	Exposome (biological)	genus_Mycena	Blood test	MCH
exposome_genus_Mycobacterium	Total_Bilirubin	0.917663	0.0280085	1.55271	Exposome (biological)	genus_Mycobacterium	Blood test	Total_Bilirubin
exposome_genus_Mycobacterium	Hemoglobin_A1c	0.917663	0.0280085	1.55271	Exposome (biological)	genus_Mycobacterium	Blood test	Hemoglobin_A1c
exposome_genus_Mycobacterium	LDL.HDL_Ratio	0.917663	0.0280085	1.55271	Exposome (biological)	genus_Mycobacterium	Blood test	LDL.HDL_Ratio
exposome_genus_Mycosphaerella	Hematocrit	0.974679	0.00481823	2.31711	Exposome (biological)	genus_Mycosphaerella	Blood test	Hematocrit
exposome_genus_Mycosphaerella	Platelet_count	-0.974679	0.00481823	2.31711	Exposome (biological)	genus_Mycosphaerella	Blood test	Platelet_count
exposome_genus_Mycosphaerella	RDW	0.974679	0.00481823	2.31711	Exposome (biological)	genus_Mycosphaerella	Blood test	RDW
exposome_genus_Mycosphaerella	Alk_P.TASE._Total._Ser.Plas	0.974679	0.00481823	2.31711	Exposome (biological)	genus_Mycosphaerella	Blood test	Alk_P.TASE._Total._Ser.Plas
exposome_genus_Mycosphaerella	Albumin._Ser.Plas	0.974679	0.00481823	2.31711	Exposome (biological)	genus_Mycosphaerella	Blood test	Albumin._Ser.Plas
exposome_genus_Necator	Creatinine._Ser.Plas	0.917663	0.0280085	1.55271	Exposome (biological)	genus_Necator	Blood test	Creatinine._Ser.Plas
exposome_genus_Neofusicoccum	Hematocrit	0.974679	0.00481823	2.31711	Exposome (biological)	genus_Neofusicoccum	Blood test	Hematocrit
exposome_genus_Neofusicoccum	Platelet_count	-0.974679	0.00481823	2.31711	Exposome (biological)	genus_Neofusicoccum	Blood test	Platelet_count
exposome_genus_Neofusicoccum	RDW	0.974679	0.00481823	2.31711	Exposome (biological)	genus_Neofusicoccum	Blood test	RDW
exposome_genus_Neofusicoccum	Alk_P.TASE._Total._Ser.Plas	0.974679	0.00481823	2.31711	Exposome (biological)	genus_Neofusicoccum	Blood test	Alk_P.TASE._Total._Ser.Plas
exposome_genus_Neofusicoccum	Albumin._Ser.Plas	0.974679	0.00481823	2.31711	Exposome (biological)	genus_Neofusicoccum	Blood test	Albumin._Ser.Plas
exposome_genus_Neolentinus	MCH	1	0.0166667	1.77815	Exposome (biological)	genus_Neolentinus	Blood test	MCH
exposome_genus_Neonectria	Creatinine._Ser.Plas	0.917663	0.0280085	1.55271	Exposome (biological)	genus_Neonectria	Blood test	Creatinine._Ser.Plas
exposome_genus_Neurospora	Creatinine._Ser.Plas	0.917663	0.0280085	1.55271	Exposome (biological)	genus_Neurospora	Blood test	Creatinine._Ser.Plas
exposome_genus_Niabella	MCHC	-0.921053	0.0263105	1.57987	Exposome (biological)	genus_Niabella	Blood test	MCHC
exposome_genus_Niabella	Globulin	-0.921053	0.0263105	1.57987	Exposome (biological)	genus_Niabella	Blood test	Globulin
exposome_genus_Niastella	EOS._.	-1	0.0166667	1.77815	Exposome (biological)	genus_Niastella	Blood test	EOS._.
exposome_genus_Niastella	EOS._ABS	-1	0.0166667	1.77815	Exposome (biological)	genus_Niastella	Blood test	EOS._ABS
exposome_genus_Niastella	CO2._Ser.Plas	-1	0.0166667	1.77815	Exposome (biological)	genus_Niastella	Blood test	CO2._Ser.Plas
exposome_genus_Ochroconis	WBC	-0.974679	0.00481823	2.31711	Exposome (biological)	genus_Ochroconis	Blood test	WBC
exposome_genus_Ochroconis	MCV	0.974679	0.00481823	2.31711	Exposome (biological)	genus_Ochroconis	Blood test	MCV
exposome_genus_Omphalotus	MCH	0.974679	0.00481823	2.31711	Exposome (biological)	genus_Omphalotus	Blood test	MCH
exposome_genus_Onygena	Glucose._Ser.Plas	-1	0.0166667	1.77815	Exposome (biological)	genus_Onygena	Blood test	Glucose._Ser.Plas
exposome_genus_Oropetium	Total_Bilirubin	0.917663	0.0280085	1.55271	Exposome (biological)	genus_Oropetium	Blood test	Total_Bilirubin
exposome_genus_Oropetium	Hemoglobin_A1c	0.917663	0.0280085	1.55271	Exposome (biological)	genus_Oropetium	Blood test	Hemoglobin_A1c
exposome_genus_Oropetium	LDL.HDL_Ratio	0.917663	0.0280085	1.55271	Exposome (biological)	genus_Oropetium	Blood test	LDL.HDL_Ratio
exposome_genus_Pantoea	Creatinine._Ser.Plas	0.917663	0.0280085	1.55271	Exposome (biological)	genus_Pantoea	Blood test	Creatinine._Ser.Plas
exposome_genus_Paraphoma	MCHC	-0.921053	0.0263105	1.57987	Exposome (biological)	genus_Paraphoma	Blood test	MCHC
exposome_genus_Paraphoma	Globulin	-0.921053	0.0263105	1.57987	Exposome (biological)	genus_Paraphoma	Blood test	Globulin
exposome_genus_Parastagonospora	eGFR	-0.973329	0.00520786	1.98231	Exposome (biological)	genus_Parastagonospora	Blood test	eGFR
exposome_genus_Parastagonospora	LDL_.Calculated.	0.947368	0.0143795	1.84226	Exposome (biological)	genus_Parastagonospora	Blood test	LDL_.Calculated.
exposome_genus_Passalora	Hematocrit	0.974679	0.00481823	2.31711	Exposome (biological)	genus_Passalora	Blood test	Hematocrit
exposome_genus_Passalora	Platelet_count	-0.974679	0.00481823	2.31711	Exposome (biological)	genus_Passalora	Blood test	Platelet_count
exposome_genus_Passalora	RDW	0.974679	0.00481823	2.31711	Exposome (biological)	genus_Passalora	Blood test	RDW
exposome_genus_Passalora	Alk_P.TASE._Total._Ser.Plas	0.974679	0.00481823	2.31711	Exposome (biological)	genus_Passalora	Blood test	Alk_P.TASE._Total._Ser.Plas
exposome_genus_Passalora	Albumin._Ser.Plas	0.974679	0.00481823	2.31711	Exposome (biological)	genus_Passalora	Blood test	Albumin._Ser.Plas
exposome_genus_Paxillus	Total_Bilirubin	0.917663	0.0280085	1.55271	Exposome (biological)	genus_Paxillus	Blood test	Total_Bilirubin
exposome_genus_Paxillus	Hemoglobin_A1c	0.917663	0.0280085	1.55271	Exposome (biological)	genus_Paxillus	Blood test	Hemoglobin_A1c
exposome_genus_Paxillus	LDL.HDL_Ratio	0.917663	0.0280085	1.55271	Exposome (biological)	genus_Paxillus	Blood test	LDL.HDL_Ratio
exposome_genus_Pedobacter	Hematocrit	1	0.0166667	1.77815	Exposome (biological)	genus_Pedobacter	Blood test	Hematocrit
exposome_genus_Pedobacter	Platelet_count	-1	0.0166667	1.77815	Exposome (biological)	genus_Pedobacter	Blood test	Platelet_count
exposome_genus_Pedobacter	RDW	1	0.0166667	1.77815	Exposome (biological)	genus_Pedobacter	Blood test	RDW
exposome_genus_Pedobacter	Alk_P.TASE._Total._Ser.Plas	1	0.0166667	1.77815	Exposome (biological)	genus_Pedobacter	Blood test	Alk_P.TASE._Total._Ser.Plas
exposome_genus_Pedobacter	Albumin._Ser.Plas	1	0.0166667	1.77815	Exposome (biological)	genus_Pedobacter	Blood test	Albumin._Ser.Plas
exposome_genus_Peltaster	Creatinine._Ser.Plas	0.917663	0.0280085	1.55271	Exposome (biological)	genus_Peltaster	Blood test	Creatinine._Ser.Plas
exposome_genus_Penstemon	MCHC	-0.917663	0.0280085	1.55271	Exposome (biological)	genus_Penstemon	Blood test	MCHC
exposome_genus_Penstemon	Globulin	-0.917663	0.0280085	1.55271	Exposome (biological)	genus_Penstemon	Blood test	Globulin
exposome_genus_Peptoclostridium	Potassium._Ser.Plas	-0.917663	0.0280085	1.55271	Exposome (biological)	genus_Peptoclostridium	Blood test	Potassium._Ser.Plas
exposome_genus_Pestalotiopsis	Creatinine._Ser.Plas	0.917663	0.0280085	1.55271	Exposome (biological)	genus_Pestalotiopsis	Blood test	Creatinine._Ser.Plas
exposome_genus_Phaeoacremonium	Total_Bilirubin	0.921053	0.0263105	1.57987	Exposome (biological)	genus_Phaeoacremonium	Blood test	Total_Bilirubin
exposome_genus_Phaeoacremonium	Hemoglobin_A1c	0.921053	0.0263105	1.57987	Exposome (biological)	genus_Phaeoacremonium	Blood test	Hemoglobin_A1c
exposome_genus_Phaeoacremonium	LDL.HDL_Ratio	0.921053	0.0263105	1.57987	Exposome (biological)	genus_Phaeoacremonium	Blood test	LDL.HDL_Ratio
exposome_genus_Phanerochaete	Glucose._Ser.Plas	-1	0.0166667	1.77815	Exposome (biological)	genus_Phanerochaete	Blood test	Glucose._Ser.Plas
exposome_genus_Phellinus	MCH	1	0.0166667	1.77815	Exposome (biological)	genus_Phellinus	Blood test	MCH
exposome_genus_Phoma	MCHC	-0.917663	0.0280085	1.55271	Exposome (biological)	genus_Phoma	Blood test	MCHC
exposome_genus_Phoma	Globulin	-0.917663	0.0280085	1.55271	Exposome (biological)	genus_Phoma	Blood test	Globulin
exposome_genus_Phyllosticta	Creatinine._Ser.Plas	0.917663	0.0280085	1.55271	Exposome (biological)	genus_Phyllosticta	Blood test	Creatinine._Ser.Plas
exposome_genus_Physarum	Total_Bilirubin	0.917663	0.0280085	1.55271	Exposome (biological)	genus_Physarum	Blood test	Total_Bilirubin
exposome_genus_Physarum	Hemoglobin_A1c	0.917663	0.0280085	1.55271	Exposome (biological)	genus_Physarum	Blood test	Hemoglobin_A1c
exposome_genus_Physarum	LDL.HDL_Ratio	0.917663	0.0280085	1.55271	Exposome (biological)	genus_Physarum	Blood test	LDL.HDL_Ratio
exposome_genus_Pisolithus	BASO._.	1	0.0166667	1.77815	Exposome (biological)	genus_Pisolithus	Blood test	BASO._.
exposome_genus_Plicaturopsis	MCH	1	0.0166667	1.77815	Exposome (biological)	genus_Plicaturopsis	Blood test	MCH
exposome_genus_Plutella	Total_Bilirubin	0.917663	0.0280085	1.55271	Exposome (biological)	genus_Plutella	Blood test	Total_Bilirubin
exposome_genus_Plutella	Hemoglobin_A1c	0.917663	0.0280085	1.55271	Exposome (biological)	genus_Plutella	Blood test	Hemoglobin_A1c
exposome_genus_Plutella	LDL.HDL_Ratio	0.917663	0.0280085	1.55271	Exposome (biological)	genus_Plutella	Blood test	LDL.HDL_Ratio
exposome_genus_Populus	Creatinine._Ser.Plas	0.917663	0.0280085	1.55271	Exposome (biological)	genus_Populus	Blood test	Creatinine._Ser.Plas
exposome_genus_Postia	MCH	1	0.0166667	1.77815	Exposome (biological)	genus_Postia	Blood test	MCH
exposome_genus_Preussia	MCV	1	0.0166667	1.77815	Exposome (biological)	genus_Preussia	Blood test	MCV
exposome_genus_Proteiniphilum	MCHC	-0.917663	0.0280085	1.55271	Exposome (biological)	genus_Proteiniphilum	Blood test	MCHC
exposome_genus_Proteiniphilum	Globulin	-0.917663	0.0280085	1.55271	Exposome (biological)	genus_Proteiniphilum	Blood test	Globulin
exposome_genus_Prunus	Creatinine._Ser.Plas	0.917663	0.0280085	1.55271	Exposome (biological)	genus_Prunus	Blood test	Creatinine._Ser.Plas
exposome_genus_Pseudobacteroides	BASOS._ABS	-0.917663	0.0280085	1.55271	Exposome (biological)	genus_Pseudobacteroides	Blood test	BASOS._ABS
exposome_genus_Pseudomonas	Creatinine._Ser.Plas	0.917663	0.0280085	1.55271	Exposome (biological)	genus_Pseudomonas	Blood test	Creatinine._Ser.Plas
exposome_genus_Pseudotsuga	Hemoglobin	0.974679	0.00481823	2.14102	Exposome (biological)	genus_Pseudotsuga	Blood test	Hemoglobin
exposome_genus_Pseudotsuga	RBC	0.974679	0.00481823	2.14102	Exposome (biological)	genus_Pseudotsuga	Blood test	RBC
exposome_genus_Pseudotsuga	Creatinine._Ser.Plas	0.921053	0.0263105	1.57987	Exposome (biological)	genus_Pseudotsuga	Blood test	Creatinine._Ser.Plas
exposome_genus_Pseudozyma	Total_Bilirubin	0.917663	0.0280085	1.55271	Exposome (biological)	genus_Pseudozyma	Blood test	Total_Bilirubin
exposome_genus_Pseudozyma	Hemoglobin_A1c	0.917663	0.0280085	1.55271	Exposome (biological)	genus_Pseudozyma	Blood test	Hemoglobin_A1c
exposome_genus_Pseudozyma	LDL.HDL_Ratio	0.917663	0.0280085	1.55271	Exposome (biological)	genus_Pseudozyma	Blood test	LDL.HDL_Ratio
exposome_genus_Puccinia	Creatinine._Ser.Plas	0.917663	0.0280085	1.55271	Exposome (biological)	genus_Puccinia	Blood test	Creatinine._Ser.Plas
exposome_genus_Pyrenochaeta	Hemoglobin	0.974679	0.00481823	2.14102	Exposome (biological)	genus_Pyrenochaeta	Blood test	Hemoglobin
exposome_genus_Pyrenochaeta	RBC	0.974679	0.00481823	2.14102	Exposome (biological)	genus_Pyrenochaeta	Blood test	RBC
exposome_genus_Pyrenochaeta	Creatinine._Ser.Plas	0.921053	0.0263105	1.57987	Exposome (biological)	genus_Pyrenochaeta	Blood test	Creatinine._Ser.Plas
exposome_genus_Pyrenophora	Calcium._Ser.Plas	-1	0.0166667	1.77815	Exposome (biological)	genus_Pyrenophora	Blood test	Calcium._Ser.Plas
exposome_genus_Quercus	EOS._.	-0.974679	0.00481823	2.31711	Exposome (biological)	genus_Quercus	Blood test	EOS._.
exposome_genus_Quercus	EOS._ABS	-0.974679	0.00481823	2.31711	Exposome (biological)	genus_Quercus	Blood test	EOS._ABS
exposome_genus_Quercus	Chloride._Ser.Plas	-0.974679	0.00481823	2.31711	Exposome (biological)	genus_Quercus	Blood test	Chloride._Ser.Plas
exposome_genus_Quercus	CO2._Ser.Plas	-0.974679	0.00481823	2.31711	Exposome (biological)	genus_Quercus	Blood test	CO2._Ser.Plas
exposome_genus_Rasamsonia	Hematocrit	1	0.0166667	1.77815	Exposome (biological)	genus_Rasamsonia	Blood test	Hematocrit
exposome_genus_Rasamsonia	Platelet_count	-1	0.0166667	1.77815	Exposome (biological)	genus_Rasamsonia	Blood test	Platelet_count
exposome_genus_Rasamsonia	RDW	1	0.0166667	1.77815	Exposome (biological)	genus_Rasamsonia	Blood test	RDW
exposome_genus_Rasamsonia	Alk_P.TASE._Total._Ser.Plas	1	0.0166667	1.77815	Exposome (biological)	genus_Rasamsonia	Blood test	Alk_P.TASE._Total._Ser.Plas
exposome_genus_Rasamsonia	Albumin._Ser.Plas	1	0.0166667	1.77815	Exposome (biological)	genus_Rasamsonia	Blood test	Albumin._Ser.Plas
exposome_genus_Reticulascus	Creatinine._Ser.Plas	0.917663	0.0280085	1.55271	Exposome (biological)	genus_Reticulascus	Blood test	Creatinine._Ser.Plas
exposome_genus_Rhodotorula	Creatinine._Ser.Plas	0.974679	0.00481823	1.83999	Exposome (biological)	genus_Rhodotorula	Blood test	Creatinine._Ser.Plas
exposome_genus_Rhodotorula	AST_.SGOT.._Ser.Plas	-1	0.0166667	1.77815	Exposome (biological)	genus_Rhodotorula	Blood test	AST_.SGOT.._Ser.Plas
exposome_genus_Rhodotorula	ALT_.SGPT.._Ser.Plas	-1	0.0166667	1.77815	Exposome (biological)	genus_Rhodotorula	Blood test	ALT_.SGPT.._Ser.Plas
exposome_genus_Ricinus	Total_Bilirubin	0.917663	0.0280085	1.55271	Exposome (biological)	genus_Ricinus	Blood test	Total_Bilirubin
exposome_genus_Ricinus	Hemoglobin_A1c	0.917663	0.0280085	1.55271	Exposome (biological)	genus_Ricinus	Blood test	Hemoglobin_A1c
exposome_genus_Ricinus	LDL.HDL_Ratio	0.917663	0.0280085	1.55271	Exposome (biological)	genus_Ricinus	Blood test	LDL.HDL_Ratio
exposome_genus_Rosa	MCHC	-0.917663	0.0280085	1.55271	Exposome (biological)	genus_Rosa	Blood test	MCHC
exposome_genus_Rosa	Globulin	-0.917663	0.0280085	1.55271	Exposome (biological)	genus_Rosa	Blood test	Globulin
exposome_genus_Rosellinia	MCH	1	0.0166667	1.77815	Exposome (biological)	genus_Rosellinia	Blood test	MCH
exposome_genus_Rothia	BASOS._ABS	-0.917663	0.0280085	1.55271	Exposome (biological)	genus_Rothia	Blood test	BASOS._ABS
exposome_genus_Rufibacter	Total_Bilirubin	0.917663	0.0280085	1.55271	Exposome (biological)	genus_Rufibacter	Blood test	Total_Bilirubin
exposome_genus_Rufibacter	Hemoglobin_A1c	0.917663	0.0280085	1.55271	Exposome (biological)	genus_Rufibacter	Blood test	Hemoglobin_A1c
exposome_genus_Rufibacter	LDL.HDL_Ratio	0.917663	0.0280085	1.55271	Exposome (biological)	genus_Rufibacter	Blood test	LDL.HDL_Ratio
exposome_genus_Rutstroemia	BASOS._ABS	-0.917663	0.0280085	1.55271	Exposome (biological)	genus_Rutstroemia	Blood test	BASOS._ABS
exposome_genus_Salmonella	Total_Bilirubin	0.917663	0.0280085	1.55271	Exposome (biological)	genus_Salmonella	Blood test	Total_Bilirubin
exposome_genus_Salmonella	Hemoglobin_A1c	0.917663	0.0280085	1.55271	Exposome (biological)	genus_Salmonella	Blood test	Hemoglobin_A1c
exposome_genus_Salmonella	LDL.HDL_Ratio	0.917663	0.0280085	1.55271	Exposome (biological)	genus_Salmonella	Blood test	LDL.HDL_Ratio
exposome_genus_Scedosporium	BASO._.	0.974679	0.00481823	2.31711	Exposome (biological)	genus_Scedosporium	Blood test	BASO._.
exposome_genus_Scedosporium	LYM._ABS	-0.974679	0.00481823	2.31711	Exposome (biological)	genus_Scedosporium	Blood test	LYM._ABS
exposome_genus_Scedosporium	Urea_Nitrogen.Ser.Plas	-0.974679	0.00481823	2.31711	Exposome (biological)	genus_Scedosporium	Blood test	Urea_Nitrogen.Ser.Plas
exposome_genus_Scedosporium	Protein._Total._Ser.Plas	0.974679	0.00481823	2.31711	Exposome (biological)	genus_Scedosporium	Blood test	Protein._Total._Ser.Plas
exposome_genus_Scedosporium	Non.HDL_Chol._Calc	-0.974679	0.00481823	2.31711	Exposome (biological)	genus_Scedosporium	Blood test	Non.HDL_Chol._Calc
exposome_genus_Scedosporium	Cholesterol.HDL_Ratio	-0.974679	0.00481823	2.31711	Exposome (biological)	genus_Scedosporium	Blood test	Cholesterol.HDL_Ratio
exposome_genus_Schizopora	Glucose._Ser.Plas	-1	0.0166667	1.77815	Exposome (biological)	genus_Schizopora	Blood test	Glucose._Ser.Plas
exposome_genus_Sediminibacterium	EOS._.	-0.974679	0.00481823	2.31711	Exposome (biological)	genus_Sediminibacterium	Blood test	EOS._.
exposome_genus_Sediminibacterium	EOS._ABS	-0.974679	0.00481823	2.31711	Exposome (biological)	genus_Sediminibacterium	Blood test	EOS._ABS
exposome_genus_Sediminibacterium	Chloride._Ser.Plas	-0.974679	0.00481823	2.31711	Exposome (biological)	genus_Sediminibacterium	Blood test	Chloride._Ser.Plas
exposome_genus_Sediminibacterium	CO2._Ser.Plas	-0.974679	0.00481823	2.31711	Exposome (biological)	genus_Sediminibacterium	Blood test	CO2._Ser.Plas
exposome_genus_Segetibacter	MCV	1	0.0166667	1.77815	Exposome (biological)	genus_Segetibacter	Blood test	MCV
exposome_genus_Serpula	BASO._.	0.974679	0.00481823	2.31711	Exposome (biological)	genus_Serpula	Blood test	BASO._.
exposome_genus_Serpula	LYM._ABS	-0.974679	0.00481823	2.31711	Exposome (biological)	genus_Serpula	Blood test	LYM._ABS
exposome_genus_Serpula	Urea_Nitrogen.Ser.Plas	-0.974679	0.00481823	2.31711	Exposome (biological)	genus_Serpula	Blood test	Urea_Nitrogen.Ser.Plas
exposome_genus_Serpula	Protein._Total._Ser.Plas	0.974679	0.00481823	2.31711	Exposome (biological)	genus_Serpula	Blood test	Protein._Total._Ser.Plas
exposome_genus_Serpula	Non.HDL_Chol._Calc	-0.974679	0.00481823	2.31711	Exposome (biological)	genus_Serpula	Blood test	Non.HDL_Chol._Calc
exposome_genus_Serpula	Cholesterol.HDL_Ratio	-0.974679	0.00481823	2.31711	Exposome (biological)	genus_Serpula	Blood test	Cholesterol.HDL_Ratio
exposome_genus_Sistotremastrum	Calcium._Ser.Plas	1	0.0166667	1.77815	Exposome (biological)	genus_Sistotremastrum	Blood test	Calcium._Ser.Plas
exposome_genus_Sphingobacterium	MCHC	-0.921053	0.0263105	1.57987	Exposome (biological)	genus_Sphingobacterium	Blood test	MCHC
exposome_genus_Sphingobacterium	Globulin	-0.921053	0.0263105	1.57987	Exposome (biological)	genus_Sphingobacterium	Blood test	Globulin
exposome_genus_Sporosarcina	Hematocrit	1	0.0166667	1.77815	Exposome (biological)	genus_Sporosarcina	Blood test	Hematocrit
exposome_genus_Sporosarcina	Platelet_count	-1	0.0166667	1.77815	Exposome (biological)	genus_Sporosarcina	Blood test	Platelet_count
exposome_genus_Sporosarcina	RDW	1	0.0166667	1.77815	Exposome (biological)	genus_Sporosarcina	Blood test	RDW
exposome_genus_Sporosarcina	Alk_P.TASE._Total._Ser.Plas	1	0.0166667	1.77815	Exposome (biological)	genus_Sporosarcina	Blood test	Alk_P.TASE._Total._Ser.Plas
exposome_genus_Sporosarcina	Albumin._Ser.Plas	1	0.0166667	1.77815	Exposome (biological)	genus_Sporosarcina	Blood test	Albumin._Ser.Plas
exposome_genus_Sporothrix	WBC	-0.974679	0.00481823	2.31711	Exposome (biological)	genus_Sporothrix	Blood test	WBC
exposome_genus_Sporothrix	MCV	0.974679	0.00481823	2.31711	Exposome (biological)	genus_Sporothrix	Blood test	MCV
exposome_genus_Staphylococcus	Glucose._Ser.Plas	-1	0.0166667	1.77815	Exposome (biological)	genus_Staphylococcus	Blood test	Glucose._Ser.Plas
exposome_genus_Streptomyces	EOS._.	-0.974679	0.00481823	2.31711	Exposome (biological)	genus_Streptomyces	Blood test	EOS._.
exposome_genus_Streptomyces	EOS._ABS	-0.974679	0.00481823	2.31711	Exposome (biological)	genus_Streptomyces	Blood test	EOS._ABS
exposome_genus_Streptomyces	Chloride._Ser.Plas	-0.974679	0.00481823	2.31711	Exposome (biological)	genus_Streptomyces	Blood test	Chloride._Ser.Plas
exposome_genus_Streptomyces	CO2._Ser.Plas	-0.974679	0.00481823	2.31711	Exposome (biological)	genus_Streptomyces	Blood test	CO2._Ser.Plas
exposome_genus_Suillus	Total_Bilirubin	0.921053	0.0263105	1.57987	Exposome (biological)	genus_Suillus	Blood test	Total_Bilirubin
exposome_genus_Suillus	Hemoglobin_A1c	0.921053	0.0263105	1.57987	Exposome (biological)	genus_Suillus	Blood test	Hemoglobin_A1c
exposome_genus_Suillus	LDL.HDL_Ratio	0.921053	0.0263105	1.57987	Exposome (biological)	genus_Suillus	Blood test	LDL.HDL_Ratio
exposome_genus_Taiwanofungus	Glucose._Ser.Plas	-1	0.0166667	1.77815	Exposome (biological)	genus_Taiwanofungus	Blood test	Glucose._Ser.Plas
exposome_genus_Talaromyces	MCH	1	0.0166667	1.77815	Exposome (biological)	genus_Talaromyces	Blood test	MCH
exposome_genus_Taphrina	Hematocrit	0.974679	0.00481823	2.31711	Exposome (biological)	genus_Taphrina	Blood test	Hematocrit
exposome_genus_Taphrina	Platelet_count	-0.974679	0.00481823	2.31711	Exposome (biological)	genus_Taphrina	Blood test	Platelet_count
exposome_genus_Taphrina	RDW	0.974679	0.00481823	2.31711	Exposome (biological)	genus_Taphrina	Blood test	RDW
exposome_genus_Taphrina	Alk_P.TASE._Total._Ser.Plas	0.974679	0.00481823	2.31711	Exposome (biological)	genus_Taphrina	Blood test	Alk_P.TASE._Total._Ser.Plas
exposome_genus_Taphrina	Albumin._Ser.Plas	0.974679	0.00481823	2.31711	Exposome (biological)	genus_Taphrina	Blood test	Albumin._Ser.Plas
exposome_genus_Tarenaya	BASO._.	0.974679	0.00481823	2.31711	Exposome (biological)	genus_Tarenaya	Blood test	BASO._.
exposome_genus_Tarenaya	LYM._ABS	-0.974679	0.00481823	2.31711	Exposome (biological)	genus_Tarenaya	Blood test	LYM._ABS
exposome_genus_Tarenaya	Urea_Nitrogen.Ser.Plas	-0.974679	0.00481823	2.31711	Exposome (biological)	genus_Tarenaya	Blood test	Urea_Nitrogen.Ser.Plas
exposome_genus_Tarenaya	Protein._Total._Ser.Plas	0.974679	0.00481823	2.31711	Exposome (biological)	genus_Tarenaya	Blood test	Protein._Total._Ser.Plas
exposome_genus_Tarenaya	Non.HDL_Chol._Calc	-0.974679	0.00481823	2.31711	Exposome (biological)	genus_Tarenaya	Blood test	Non.HDL_Chol._Calc
exposome_genus_Tarenaya	Cholesterol.HDL_Ratio	-0.974679	0.00481823	2.31711	Exposome (biological)	genus_Tarenaya	Blood test	Cholesterol.HDL_Ratio
exposome_genus_Termitomyces	Glucose._Ser.Plas	-1	0.0166667	1.77815	Exposome (biological)	genus_Termitomyces	Blood test	Glucose._Ser.Plas
exposome_genus_Terrimonas	eGFR	-0.948683	0.0138468	1.85865	Exposome (biological)	genus_Terrimonas	Blood test	eGFR
exposome_genus_Tilletiaria	MCH	0.974679	0.00481823	2.31711	Exposome (biological)	genus_Tilletiaria	Blood test	MCH
exposome_genus_Tolypocladium	Hematocrit	0.974679	0.00481823	2.31711	Exposome (biological)	genus_Tolypocladium	Blood test	Hematocrit
exposome_genus_Tolypocladium	Platelet_count	-0.974679	0.00481823	2.31711	Exposome (biological)	genus_Tolypocladium	Blood test	Platelet_count
exposome_genus_Tolypocladium	RDW	0.974679	0.00481823	2.31711	Exposome (biological)	genus_Tolypocladium	Blood test	RDW
exposome_genus_Tolypocladium	Alk_P.TASE._Total._Ser.Plas	0.974679	0.00481823	2.31711	Exposome (biological)	genus_Tolypocladium	Blood test	Alk_P.TASE._Total._Ser.Plas
exposome_genus_Tolypocladium	Albumin._Ser.Plas	0.974679	0.00481823	2.31711	Exposome (biological)	genus_Tolypocladium	Blood test	Albumin._Ser.Plas
exposome_genus_Trachymyrmex	LDL_.Calculated.	-0.917663	0.0280085	1.55271	Exposome (biological)	genus_Trachymyrmex	Blood test	LDL_.Calculated.
exposome_genus_Trametes	HDL_Cholesterol	-1	0.0166667	1.77815	Exposome (biological)	genus_Trametes	Blood test	HDL_Cholesterol
exposome_genus_Tremella	Hemoglobin	0.974679	0.00481823	2.14102	Exposome (biological)	genus_Tremella	Blood test	Hemoglobin
exposome_genus_Tremella	RBC	0.974679	0.00481823	2.14102	Exposome (biological)	genus_Tremella	Blood test	RBC
exposome_genus_Tremella	Creatinine._Ser.Plas	0.921053	0.0263105	1.57987	Exposome (biological)	genus_Tremella	Blood test	Creatinine._Ser.Plas
exposome_genus_Trichosporon	Creatinine._Ser.Plas	0.917663	0.0280085	1.55271	Exposome (biological)	genus_Trichosporon	Blood test	Creatinine._Ser.Plas
exposome_genus_Tulasnella	BASO._.	1	0.0166667	1.77815	Exposome (biological)	genus_Tulasnella	Blood test	BASO._.
exposome_genus_Ustilago	Creatinine._Ser.Plas	0.917663	0.0280085	1.55271	Exposome (biological)	genus_Ustilago	Blood test	Creatinine._Ser.Plas
exposome_genus_Valsa	Hemoglobin	0.974679	0.00481823	2.14102	Exposome (biological)	genus_Valsa	Blood test	Hemoglobin
exposome_genus_Valsa	RBC	0.974679	0.00481823	2.14102	Exposome (biological)	genus_Valsa	Blood test	RBC
exposome_genus_Valsa	Creatinine._Ser.Plas	0.921053	0.0263105	1.57987	Exposome (biological)	genus_Valsa	Blood test	Creatinine._Ser.Plas
exposome_genus_Verticillium	Hematocrit	0.974679	0.00481823	2.31711	Exposome (biological)	genus_Verticillium	Blood test	Hematocrit
exposome_genus_Verticillium	Platelet_count	-0.974679	0.00481823	2.31711	Exposome (biological)	genus_Verticillium	Blood test	Platelet_count
exposome_genus_Verticillium	RDW	0.974679	0.00481823	2.31711	Exposome (biological)	genus_Verticillium	Blood test	RDW
exposome_genus_Verticillium	Alk_P.TASE._Total._Ser.Plas	0.974679	0.00481823	2.31711	Exposome (biological)	genus_Verticillium	Blood test	Alk_P.TASE._Total._Ser.Plas
exposome_genus_Verticillium	Albumin._Ser.Plas	0.974679	0.00481823	2.31711	Exposome (biological)	genus_Verticillium	Blood test	Albumin._Ser.Plas
exposome_genus_Vitis	Creatinine._Ser.Plas	0.921053	0.0263105	1.57987	Exposome (biological)	genus_Vitis	Blood test	Creatinine._Ser.Plas
exposome_genus_Vitis	AST_.SGOT.._Ser.Plas	-0.974679	0.00481823	2.14102	Exposome (biological)	genus_Vitis	Blood test	AST_.SGOT.._Ser.Plas
exposome_genus_Vitis	ALT_.SGPT.._Ser.Plas	-0.974679	0.00481823	2.14102	Exposome (biological)	genus_Vitis	Blood test	ALT_.SGPT.._Ser.Plas
exposome_genus_Wallemia	Glucose._Ser.Plas	-1	0.0166667	1.77815	Exposome (biological)	genus_Wallemia	Blood test	Glucose._Ser.Plas
exposome_genus_Xylona	Creatinine._Ser.Plas	0.917663	0.0280085	1.55271	Exposome (biological)	genus_Xylona	Blood test	Creatinine._Ser.Plas
exposome_genus_Yersinia	Total_Bilirubin	0.917663	0.0280085	1.55271	Exposome (biological)	genus_Yersinia	Blood test	Total_Bilirubin
exposome_genus_Yersinia	Hemoglobin_A1c	0.917663	0.0280085	1.55271	Exposome (biological)	genus_Yersinia	Blood test	Hemoglobin_A1c
exposome_genus_Yersinia	LDL.HDL_Ratio	0.917663	0.0280085	1.55271	Exposome (biological)	genus_Yersinia	Blood test	LDL.HDL_Ratio
exposome_genus_Ziziphus	Hematocrit	0.974679	0.00481823	2.31711	Exposome (biological)	genus_Ziziphus	Blood test	Hematocrit
exposome_genus_Ziziphus	Platelet_count	-0.974679	0.00481823	2.31711	Exposome (biological)	genus_Ziziphus	Blood test	Platelet_count
exposome_genus_Ziziphus	RDW	0.974679	0.00481823	2.31711	Exposome (biological)	genus_Ziziphus	Blood test	RDW
exposome_genus_Ziziphus	Alk_P.TASE._Total._Ser.Plas	0.974679	0.00481823	2.31711	Exposome (biological)	genus_Ziziphus	Blood test	Alk_P.TASE._Total._Ser.Plas
exposome_genus_Ziziphus	Albumin._Ser.Plas	0.974679	0.00481823	2.31711	Exposome (biological)	genus_Ziziphus	Blood test	Albumin._Ser.Plas
exposome_genus_Aegilops	IL17F	0.974679	0.00481823	2.31711	Exposome (biological)	genus_Aegilops	Cytokine	IL17F
exposome_genus_Aegilops	IL12P70	0.974679	0.00481823	2.31711	Exposome (biological)	genus_Aegilops	Cytokine	IL12P70
exposome_genus_Aegilops	IL9	0.974679	0.00481823	2.31711	Exposome (biological)	genus_Aegilops	Cytokine	IL9
exposome_genus_Aegilops	VEGFD	0.974679	0.00481823	2.31711	Exposome (biological)	genus_Aegilops	Cytokine	VEGFD
exposome_genus_Aegilops	TNFB	0.974679	0.00481823	2.31711	Exposome (biological)	genus_Aegilops	Cytokine	TNFB
exposome_genus_Aegilops	IL22	0.974679	0.00481823	2.31711	Exposome (biological)	genus_Aegilops	Cytokine	IL22
exposome_genus_Aegilops	PDGFBB	0.974679	0.00481823	2.31711	Exposome (biological)	genus_Aegilops	Cytokine	PDGFBB
exposome_genus_Aegilops	VEGF	0.974679	0.00481823	2.31711	Exposome (biological)	genus_Aegilops	Cytokine	VEGF
exposome_genus_Aegilops	LEPTIN	0.974679	0.00481823	2.31711	Exposome (biological)	genus_Aegilops	Cytokine	LEPTIN
exposome_genus_Alternaria	SCF	0.974679	0.00481823	2.31711	Exposome (biological)	genus_Alternaria	Cytokine	SCF
exposome_genus_Alternaria	PAI1	0.974679	0.00481823	2.31711	Exposome (biological)	genus_Alternaria	Cytokine	PAI1
exposome_genus_Anoxybacillus	IL2	0.974679	0.00481823	2.31711	Exposome (biological)	genus_Anoxybacillus	Cytokine	IL2
exposome_genus_Anoxybacillus	MCP1	-0.974679	0.00481823	2.31711	Exposome (biological)	genus_Anoxybacillus	Cytokine	MCP1
exposome_genus_Arabis	SDF1A	0.974679	0.00481823	2.31711	Exposome (biological)	genus_Arabis	Cytokine	SDF1A
exposome_genus_Arabis	IL1A	0.974679	0.00481823	2.31711	Exposome (biological)	genus_Arabis	Cytokine	IL1A
exposome_genus_Arabis	RESISTIN	0.974679	0.00481823	2.31711	Exposome (biological)	genus_Arabis	Cytokine	RESISTIN
exposome_genus_Armillaria	BDNF	-0.974679	0.00481823	2.31711	Exposome (biological)	genus_Armillaria	Cytokine	BDNF
exposome_genus_Armillaria	CHEX1	0.974679	0.00481823	2.31711	Exposome (biological)	genus_Armillaria	Cytokine	CHEX1
exposome_genus_Aureobasidium	TGFA	-1	0.0166667	1.77815	Exposome (biological)	genus_Aureobasidium	Cytokine	TGFA
exposome_genus_Auricularia	IL23	0.974679	0.00481823	2.31711	Exposome (biological)	genus_Auricularia	Cytokine	IL23
exposome_genus_Bacillus	IL23	1	0.0166667	1.77815	Exposome (biological)	genus_Bacillus	Cytokine	IL23
exposome_genus_Baeospora	HGF	1	0.0166667	1.77815	Exposome (biological)	genus_Baeospora	Cytokine	HGF
exposome_genus_Baeospora	IFNA	-1	0.0166667	1.77815	Exposome (biological)	genus_Baeospora	Cytokine	IFNA
exposome_genus_Botrytis	IL2	0.974679	0.00481823	2.31711	Exposome (biological)	genus_Botrytis	Cytokine	IL2
exposome_genus_Botrytis	MCP1	-0.974679	0.00481823	2.31711	Exposome (biological)	genus_Botrytis	Cytokine	MCP1
exposome_genus_Byssochlamys	IL23	0.974679	0.00481823	2.31711	Exposome (biological)	genus_Byssochlamys	Cytokine	IL23
exposome_genus_Castanea	SCF	1	0.0166667	1.77815	Exposome (biological)	genus_Castanea	Cytokine	SCF
exposome_genus_Castanea	PAI1	1	0.0166667	1.77815	Exposome (biological)	genus_Castanea	Cytokine	PAI1
exposome_genus_Cenococcum	IL2	0.974679	0.00481823	2.31711	Exposome (biological)	genus_Cenococcum	Cytokine	IL2
exposome_genus_Cenococcum	MCP1	-0.974679	0.00481823	2.31711	Exposome (biological)	genus_Cenococcum	Cytokine	MCP1
exposome_genus_Chryseobacterium	SDF1A	1	0.0166667	1.77815	Exposome (biological)	genus_Chryseobacterium	Cytokine	SDF1A
exposome_genus_Chryseobacterium	IL1A	1	0.0166667	1.77815	Exposome (biological)	genus_Chryseobacterium	Cytokine	IL1A
exposome_genus_Chryseobacterium	RESISTIN	1	0.0166667	1.77815	Exposome (biological)	genus_Chryseobacterium	Cytokine	RESISTIN
exposome_genus_Chrysoporthe	MIP1A	1	0.0166667	1.77815	Exposome (biological)	genus_Chrysoporthe	Cytokine	MIP1A
exposome_genus_Chrysoporthe	IL10	1	0.0166667	1.77815	Exposome (biological)	genus_Chrysoporthe	Cytokine	IL10
exposome_genus_Chrysoporthe	IL1RA	1	0.0166667	1.77815	Exposome (biological)	genus_Chrysoporthe	Cytokine	IL1RA
exposome_genus_Chrysoporthe	RANTES	1	0.0166667	1.77815	Exposome (biological)	genus_Chrysoporthe	Cytokine	RANTES
exposome_genus_Chrysoporthe	TNFA	1	0.0166667	1.77815	Exposome (biological)	genus_Chrysoporthe	Cytokine	TNFA
exposome_genus_Chrysoporthe	MIP1B	1	0.0166667	1.77815	Exposome (biological)	genus_Chrysoporthe	Cytokine	MIP1B
exposome_genus_Chrysoporthe	TRAIL	1	0.0166667	1.77815	Exposome (biological)	genus_Chrysoporthe	Cytokine	TRAIL
exposome_genus_Chrysoporthe	IL18	1	0.0166667	1.77815	Exposome (biological)	genus_Chrysoporthe	Cytokine	IL18
exposome_genus_Chrysoporthe	MCSF	1	0.0166667	1.77815	Exposome (biological)	genus_Chrysoporthe	Cytokine	MCSF
exposome_genus_Chrysoporthe	FGFB	1	0.0166667	1.77815	Exposome (biological)	genus_Chrysoporthe	Cytokine	FGFB
exposome_genus_Chrysoporthe	CHEX2	1	0.0166667	1.77815	Exposome (biological)	genus_Chrysoporthe	Cytokine	CHEX2
exposome_genus_Clavaria	IL23	1	0.0166667	1.77815	Exposome (biological)	genus_Clavaria	Cytokine	IL23
exposome_genus_Clostridium	LIF	1	0.0166667	1.77815	Exposome (biological)	genus_Clostridium	Cytokine	LIF
exposome_genus_Coprinopsis	HGF	0.974679	0.00481823	2.31711	Exposome (biological)	genus_Coprinopsis	Cytokine	HGF
exposome_genus_Coprinopsis	IFNA	-0.974679	0.00481823	2.31711	Exposome (biological)	genus_Coprinopsis	Cytokine	IFNA
exposome_genus_Cordyceps	EGF	-0.974679	0.00481823	2.31711	Exposome (biological)	genus_Cordyceps	Cytokine	EGF
exposome_genus_Cordyceps	CD40L	-0.974679	0.00481823	2.31711	Exposome (biological)	genus_Cordyceps	Cytokine	CD40L
exposome_genus_Corynebacterium	SDF1A	-1	0.0166667	1.77815	Exposome (biological)	genus_Corynebacterium	Cytokine	SDF1A
exposome_genus_Corynebacterium	IL1A	-1	0.0166667	1.77815	Exposome (biological)	genus_Corynebacterium	Cytokine	IL1A
exposome_genus_Corynebacterium	RESISTIN	-1	0.0166667	1.77815	Exposome (biological)	genus_Corynebacterium	Cytokine	RESISTIN
exposome_genus_Daucus	LIF	0.974679	0.00481823	2.31711	Exposome (biological)	genus_Daucus	Cytokine	LIF
exposome_genus_Daucus	IL6	0.974679	0.00481823	2.31711	Exposome (biological)	genus_Daucus	Cytokine	IL6
exposome_genus_Daucus	NGF	0.974679	0.00481823	2.31711	Exposome (biological)	genus_Daucus	Cytokine	NGF
exposome_genus_Daucus	IL12P40	0.974679	0.00481823	2.31711	Exposome (biological)	genus_Daucus	Cytokine	IL12P40
exposome_genus_Daucus	IL15	0.974679	0.00481823	2.31711	Exposome (biological)	genus_Daucus	Cytokine	IL15
exposome_genus_Daucus	ICAM1	0.974679	0.00481823	2.31711	Exposome (biological)	genus_Daucus	Cytokine	ICAM1
exposome_genus_Diaporthe	IP10	0.974679	0.00481823	2.31711	Exposome (biological)	genus_Diaporthe	Cytokine	IP10
exposome_genus_Diaporthe	TGFB	0.974679	0.00481823	2.31711	Exposome (biological)	genus_Diaporthe	Cytokine	TGFB
exposome_genus_Diaporthe	MIG	0.974679	0.00481823	2.31711	Exposome (biological)	genus_Diaporthe	Cytokine	MIG
exposome_genus_Diaporthe	IL21	0.974679	0.00481823	2.31711	Exposome (biological)	genus_Diaporthe	Cytokine	IL21
exposome_genus_Diaporthe	VCAM1	0.974679	0.00481823	2.31711	Exposome (biological)	genus_Diaporthe	Cytokine	VCAM1
exposome_genus_Diaporthe	CHEX3	0.974679	0.00481823	2.31711	Exposome (biological)	genus_Diaporthe	Cytokine	CHEX3
exposome_genus_Enhydrobacter	LIF	0.974679	0.00481823	2.31711	Exposome (biological)	genus_Enhydrobacter	Cytokine	LIF
exposome_genus_Enhydrobacter	IL6	0.974679	0.00481823	2.31711	Exposome (biological)	genus_Enhydrobacter	Cytokine	IL6
exposome_genus_Enhydrobacter	NGF	0.974679	0.00481823	2.31711	Exposome (biological)	genus_Enhydrobacter	Cytokine	NGF
exposome_genus_Enhydrobacter	IL12P40	0.974679	0.00481823	2.31711	Exposome (biological)	genus_Enhydrobacter	Cytokine	IL12P40
exposome_genus_Enhydrobacter	IL15	0.974679	0.00481823	2.31711	Exposome (biological)	genus_Enhydrobacter	Cytokine	IL15
exposome_genus_Enhydrobacter	ICAM1	0.974679	0.00481823	2.31711	Exposome (biological)	genus_Enhydrobacter	Cytokine	ICAM1
exposome_genus_Enterococcus	IL23	0.974679	0.00481823	2.31711	Exposome (biological)	genus_Enterococcus	Cytokine	IL23
exposome_genus_Epilithonimonas	FASL	0.974679	0.00481823	2.31711	Exposome (biological)	genus_Epilithonimonas	Cytokine	FASL
exposome_genus_Epilithonimonas	IL27	0.974679	0.00481823	2.31711	Exposome (biological)	genus_Epilithonimonas	Cytokine	IL27
exposome_genus_Epilithonimonas	IL4	0.974679	0.00481823	2.31711	Exposome (biological)	genus_Epilithonimonas	Cytokine	IL4
exposome_genus_Epilithonimonas	IL5	0.974679	0.00481823	2.31711	Exposome (biological)	genus_Epilithonimonas	Cytokine	IL5
exposome_genus_Epilithonimonas	IL7	0.974679	0.00481823	2.31711	Exposome (biological)	genus_Epilithonimonas	Cytokine	IL7
exposome_genus_Epilithonimonas	IL8	0.974679	0.00481823	2.31711	Exposome (biological)	genus_Epilithonimonas	Cytokine	IL8
exposome_genus_Epilithonimonas	IFNB	0.974679	0.00481823	2.31711	Exposome (biological)	genus_Epilithonimonas	Cytokine	IFNB
exposome_genus_Epilithonimonas	IL13	0.974679	0.00481823	2.31711	Exposome (biological)	genus_Epilithonimonas	Cytokine	IL13
exposome_genus_Epilithonimonas	IL31	0.974679	0.00481823	2.31711	Exposome (biological)	genus_Epilithonimonas	Cytokine	IL31
exposome_genus_Epilithonimonas	IFNG	0.974679	0.00481823	2.31711	Exposome (biological)	genus_Epilithonimonas	Cytokine	IFNG
exposome_genus_Epilithonimonas	GMCSF	0.974679	0.00481823	2.31711	Exposome (biological)	genus_Epilithonimonas	Cytokine	GMCSF
exposome_genus_Epilithonimonas	GCSF	0.974679	0.00481823	2.31711	Exposome (biological)	genus_Epilithonimonas	Cytokine	GCSF
exposome_genus_Erythrobasidium	TGFA	-0.974679	0.00481823	2.31711	Exposome (biological)	genus_Erythrobasidium	Cytokine	TGFA
exposome_genus_Exidia	IL1B	1	0.0166667	1.77815	Exposome (biological)	genus_Exidia	Cytokine	IL1B
exposome_genus_Exophiala	IL2	1	0.0166667	1.77815	Exposome (biological)	genus_Exophiala	Cytokine	IL2
exposome_genus_Exophiala	MCP1	-1	0.0166667	1.77815	Exposome (biological)	genus_Exophiala	Cytokine	MCP1
exposome_genus_Felis	IL17A	1	0.0166667	1.77815	Exposome (biological)	genus_Felis	Cytokine	IL17A
exposome_genus_Felis	MCP3	1	0.0166667	1.77815	Exposome (biological)	genus_Felis	Cytokine	MCP3
exposome_genus_Flammulina	IL23	0.974679	0.00481823	2.31711	Exposome (biological)	genus_Flammulina	Cytokine	IL23
exposome_genus_Fonsecaea	EGF	-0.974679	0.00481823	2.31711	Exposome (biological)	genus_Fonsecaea	Cytokine	EGF
exposome_genus_Fonsecaea	CD40L	-0.974679	0.00481823	2.31711	Exposome (biological)	genus_Fonsecaea	Cytokine	CD40L
exposome_genus_Fraxinus	IL23	0.974679	0.00481823	2.31711	Exposome (biological)	genus_Fraxinus	Cytokine	IL23
exposome_genus_Fusarium	FASL	1	0.0166667	1.77815	Exposome (biological)	genus_Fusarium	Cytokine	FASL
exposome_genus_Fusarium	IL27	1	0.0166667	1.77815	Exposome (biological)	genus_Fusarium	Cytokine	IL27
exposome_genus_Fusarium	IL4	1	0.0166667	1.77815	Exposome (biological)	genus_Fusarium	Cytokine	IL4
exposome_genus_Fusarium	IL5	1	0.0166667	1.77815	Exposome (biological)	genus_Fusarium	Cytokine	IL5
exposome_genus_Fusarium	IL7	1	0.0166667	1.77815	Exposome (biological)	genus_Fusarium	Cytokine	IL7
exposome_genus_Fusarium	IFNB	1	0.0166667	1.77815	Exposome (biological)	genus_Fusarium	Cytokine	IFNB
exposome_genus_Fusarium	IL13	1	0.0166667	1.77815	Exposome (biological)	genus_Fusarium	Cytokine	IL13
exposome_genus_Fusarium	IL31	1	0.0166667	1.77815	Exposome (biological)	genus_Fusarium	Cytokine	IL31
exposome_genus_Fusarium	IFNG	1	0.0166667	1.77815	Exposome (biological)	genus_Fusarium	Cytokine	IFNG
exposome_genus_Fusarium	GCSF	1	0.0166667	1.77815	Exposome (biological)	genus_Fusarium	Cytokine	GCSF
exposome_genus_Ganoderma	TGFA	0.974679	0.00481823	2.31711	Exposome (biological)	genus_Ganoderma	Cytokine	TGFA
exposome_genus_Gliomastix	EGF	-0.974679	0.00481823	2.31711	Exposome (biological)	genus_Gliomastix	Cytokine	EGF
exposome_genus_Gliomastix	CD40L	-0.974679	0.00481823	2.31711	Exposome (biological)	genus_Gliomastix	Cytokine	CD40L
exposome_genus_Glonium	CHEX4	1	0.0166667	1.77815	Exposome (biological)	genus_Glonium	Cytokine	CHEX4
exposome_genus_Gongronella	BDNF	-0.974679	0.00481823	2.31711	Exposome (biological)	genus_Gongronella	Cytokine	BDNF
exposome_genus_Gongronella	CHEX1	0.974679	0.00481823	2.31711	Exposome (biological)	genus_Gongronella	Cytokine	CHEX1
exposome_genus_Haemophilus	LIF	0.974679	0.00481823	2.31711	Exposome (biological)	genus_Haemophilus	Cytokine	LIF
exposome_genus_Haemophilus	IL6	0.974679	0.00481823	2.31711	Exposome (biological)	genus_Haemophilus	Cytokine	IL6
exposome_genus_Haemophilus	NGF	0.974679	0.00481823	2.31711	Exposome (biological)	genus_Haemophilus	Cytokine	NGF
exposome_genus_Haemophilus	IL12P40	0.974679	0.00481823	2.31711	Exposome (biological)	genus_Haemophilus	Cytokine	IL12P40
exposome_genus_Haemophilus	IL15	0.974679	0.00481823	2.31711	Exposome (biological)	genus_Haemophilus	Cytokine	IL15
exposome_genus_Haemophilus	ICAM1	0.974679	0.00481823	2.31711	Exposome (biological)	genus_Haemophilus	Cytokine	ICAM1
exposome_genus_Heterobasidion	IL1B	0.974679	0.00481823	2.31711	Exposome (biological)	genus_Heterobasidion	Cytokine	IL1B
exposome_genus_Hordeum	FASL	0.974679	0.00481823	2.31711	Exposome (biological)	genus_Hordeum	Cytokine	FASL
exposome_genus_Hordeum	IL27	0.974679	0.00481823	2.31711	Exposome (biological)	genus_Hordeum	Cytokine	IL27
exposome_genus_Hordeum	IL4	0.974679	0.00481823	2.31711	Exposome (biological)	genus_Hordeum	Cytokine	IL4
exposome_genus_Hordeum	IL5	0.974679	0.00481823	2.31711	Exposome (biological)	genus_Hordeum	Cytokine	IL5
exposome_genus_Hordeum	IL7	0.974679	0.00481823	2.31711	Exposome (biological)	genus_Hordeum	Cytokine	IL7
exposome_genus_Hordeum	IL8	0.974679	0.00481823	2.31711	Exposome (biological)	genus_Hordeum	Cytokine	IL8
exposome_genus_Hordeum	IFNB	0.974679	0.00481823	2.31711	Exposome (biological)	genus_Hordeum	Cytokine	IFNB
exposome_genus_Hordeum	IL13	0.974679	0.00481823	2.31711	Exposome (biological)	genus_Hordeum	Cytokine	IL13
exposome_genus_Hordeum	IL31	0.974679	0.00481823	2.31711	Exposome (biological)	genus_Hordeum	Cytokine	IL31
exposome_genus_Hordeum	IFNG	0.974679	0.00481823	2.31711	Exposome (biological)	genus_Hordeum	Cytokine	IFNG
exposome_genus_Hordeum	GMCSF	0.974679	0.00481823	2.31711	Exposome (biological)	genus_Hordeum	Cytokine	GMCSF
exposome_genus_Hordeum	GCSF	0.974679	0.00481823	2.31711	Exposome (biological)	genus_Hordeum	Cytokine	GCSF
exposome_genus_Hymenoscyphus	IL23	1	0.0166667	1.77815	Exposome (biological)	genus_Hymenoscyphus	Cytokine	IL23
exposome_genus_Hypsizygus	IL17A	1	0.0166667	1.77815	Exposome (biological)	genus_Hypsizygus	Cytokine	IL17A
exposome_genus_Hypsizygus	MCP3	1	0.0166667	1.77815	Exposome (biological)	genus_Hypsizygus	Cytokine	MCP3
exposome_genus_Isaria	MIP1A	0.974679	0.00481823	2.31711	Exposome (biological)	genus_Isaria	Cytokine	MIP1A
exposome_genus_Isaria	IL10	0.974679	0.00481823	2.31711	Exposome (biological)	genus_Isaria	Cytokine	IL10
exposome_genus_Isaria	IL1RA	0.974679	0.00481823	2.31711	Exposome (biological)	genus_Isaria	Cytokine	IL1RA
exposome_genus_Isaria	RANTES	0.974679	0.00481823	2.31711	Exposome (biological)	genus_Isaria	Cytokine	RANTES
exposome_genus_Isaria	TNFA	0.974679	0.00481823	2.31711	Exposome (biological)	genus_Isaria	Cytokine	TNFA
exposome_genus_Isaria	MIP1B	0.974679	0.00481823	2.31711	Exposome (biological)	genus_Isaria	Cytokine	MIP1B
exposome_genus_Isaria	TRAIL	0.974679	0.00481823	2.31711	Exposome (biological)	genus_Isaria	Cytokine	TRAIL
exposome_genus_Isaria	IL18	0.974679	0.00481823	2.31711	Exposome (biological)	genus_Isaria	Cytokine	IL18
exposome_genus_Isaria	MCSF	0.974679	0.00481823	2.31711	Exposome (biological)	genus_Isaria	Cytokine	MCSF
exposome_genus_Isaria	FGFB	0.974679	0.00481823	2.31711	Exposome (biological)	genus_Isaria	Cytokine	FGFB
exposome_genus_Isaria	CHEX2	0.974679	0.00481823	2.31711	Exposome (biological)	genus_Isaria	Cytokine	CHEX2
exposome_genus_Jaapia	IL23	1	0.0166667	1.77815	Exposome (biological)	genus_Jaapia	Cytokine	IL23
exposome_genus_Lecanosticta	IL2	0.974679	0.00481823	2.31711	Exposome (biological)	genus_Lecanosticta	Cytokine	IL2
exposome_genus_Lecanosticta	MCP1	-0.974679	0.00481823	2.31711	Exposome (biological)	genus_Lecanosticta	Cytokine	MCP1
exposome_genus_Legionella	IL2	1	0.0166667	1.77815	Exposome (biological)	genus_Legionella	Cytokine	IL2
exposome_genus_Legionella	MCP1	-1	0.0166667	1.77815	Exposome (biological)	genus_Legionella	Cytokine	MCP1
exposome_genus_Malassezia	HGF	1	0.0166667	1.77815	Exposome (biological)	genus_Malassezia	Cytokine	HGF
exposome_genus_Malassezia	IFNA	-1	0.0166667	1.77815	Exposome (biological)	genus_Malassezia	Cytokine	IFNA
exposome_genus_Marssonina	IL23	1	0.0166667	1.77815	Exposome (biological)	genus_Marssonina	Cytokine	IL23
exposome_genus_Meira	SCF	0.974679	0.00481823	2.31711	Exposome (biological)	genus_Meira	Cytokine	SCF
exposome_genus_Meira	PAI1	0.974679	0.00481823	2.31711	Exposome (biological)	genus_Meira	Cytokine	PAI1
exposome_genus_Mrakia	EGF	-0.974679	0.00481823	2.31711	Exposome (biological)	genus_Mrakia	Cytokine	EGF
exposome_genus_Mrakia	CD40L	-0.974679	0.00481823	2.31711	Exposome (biological)	genus_Mrakia	Cytokine	CD40L
exposome_genus_Mycena	IL23	0.974679	0.00481823	2.31711	Exposome (biological)	genus_Mycena	Cytokine	IL23
exposome_genus_Neofusicoccum	IL2	0.974679	0.00481823	2.31711	Exposome (biological)	genus_Neofusicoccum	Cytokine	IL2
exposome_genus_Neofusicoccum	MCP1	-0.974679	0.00481823	2.31711	Exposome (biological)	genus_Neofusicoccum	Cytokine	MCP1
exposome_genus_Neolentinus	IL23	1	0.0166667	1.77815	Exposome (biological)	genus_Neolentinus	Cytokine	IL23
exposome_genus_Niabella	SCF	0.974679	0.00481823	2.31711	Exposome (biological)	genus_Niabella	Cytokine	SCF
exposome_genus_Niabella	PAI1	0.974679	0.00481823	2.31711	Exposome (biological)	genus_Niabella	Cytokine	PAI1
exposome_genus_Niastella	CHEX4	1	0.0166667	1.77815	Exposome (biological)	genus_Niastella	Cytokine	CHEX4
exposome_genus_Oceanobacillus	IL17A	1	0.0166667	1.77815	Exposome (biological)	genus_Oceanobacillus	Cytokine	IL17A
exposome_genus_Oceanobacillus	MCP3	1	0.0166667	1.77815	Exposome (biological)	genus_Oceanobacillus	Cytokine	MCP3
exposome_genus_Oidiodendron	IL6	1	0.0166667	1.77815	Exposome (biological)	genus_Oidiodendron	Cytokine	IL6
exposome_genus_Oidiodendron	NGF	1	0.0166667	1.77815	Exposome (biological)	genus_Oidiodendron	Cytokine	NGF
exposome_genus_Oidiodendron	IL12P40	1	0.0166667	1.77815	Exposome (biological)	genus_Oidiodendron	Cytokine	IL12P40
exposome_genus_Oidiodendron	IL15	1	0.0166667	1.77815	Exposome (biological)	genus_Oidiodendron	Cytokine	IL15
exposome_genus_Oidiodendron	ICAM1	1	0.0166667	1.77815	Exposome (biological)	genus_Oidiodendron	Cytokine	ICAM1
exposome_genus_Omphalotus	IL23	0.974679	0.00481823	2.31711	Exposome (biological)	genus_Omphalotus	Cytokine	IL23
exposome_genus_Paenibacillus	LIF	1	0.0166667	1.77815	Exposome (biological)	genus_Paenibacillus	Cytokine	LIF
exposome_genus_Paramecium	IL17F	0.974679	0.00481823	2.31711	Exposome (biological)	genus_Paramecium	Cytokine	IL17F
exposome_genus_Paramecium	IL12P70	0.974679	0.00481823	2.31711	Exposome (biological)	genus_Paramecium	Cytokine	IL12P70
exposome_genus_Paramecium	IL9	0.974679	0.00481823	2.31711	Exposome (biological)	genus_Paramecium	Cytokine	IL9
exposome_genus_Paramecium	VEGFD	0.974679	0.00481823	2.31711	Exposome (biological)	genus_Paramecium	Cytokine	VEGFD
exposome_genus_Paramecium	TNFB	0.974679	0.00481823	2.31711	Exposome (biological)	genus_Paramecium	Cytokine	TNFB
exposome_genus_Paramecium	IL22	0.974679	0.00481823	2.31711	Exposome (biological)	genus_Paramecium	Cytokine	IL22
exposome_genus_Paramecium	PDGFBB	0.974679	0.00481823	2.31711	Exposome (biological)	genus_Paramecium	Cytokine	PDGFBB
exposome_genus_Paramecium	VEGF	0.974679	0.00481823	2.31711	Exposome (biological)	genus_Paramecium	Cytokine	VEGF
exposome_genus_Paramecium	LEPTIN	0.974679	0.00481823	2.31711	Exposome (biological)	genus_Paramecium	Cytokine	LEPTIN
exposome_genus_Paraphaeosphaeria	MIP1A	0.974679	0.00481823	2.31711	Exposome (biological)	genus_Paraphaeosphaeria	Cytokine	MIP1A
exposome_genus_Paraphaeosphaeria	IL10	0.974679	0.00481823	2.31711	Exposome (biological)	genus_Paraphaeosphaeria	Cytokine	IL10
exposome_genus_Paraphaeosphaeria	IL1RA	0.974679	0.00481823	2.31711	Exposome (biological)	genus_Paraphaeosphaeria	Cytokine	IL1RA
exposome_genus_Paraphaeosphaeria	RANTES	0.974679	0.00481823	2.31711	Exposome (biological)	genus_Paraphaeosphaeria	Cytokine	RANTES
exposome_genus_Paraphaeosphaeria	TNFA	0.974679	0.00481823	2.31711	Exposome (biological)	genus_Paraphaeosphaeria	Cytokine	TNFA
exposome_genus_Paraphaeosphaeria	MIP1B	0.974679	0.00481823	2.31711	Exposome (biological)	genus_Paraphaeosphaeria	Cytokine	MIP1B
exposome_genus_Paraphaeosphaeria	TRAIL	0.974679	0.00481823	2.31711	Exposome (biological)	genus_Paraphaeosphaeria	Cytokine	TRAIL
exposome_genus_Paraphaeosphaeria	IL18	0.974679	0.00481823	2.31711	Exposome (biological)	genus_Paraphaeosphaeria	Cytokine	IL18
exposome_genus_Paraphaeosphaeria	MCSF	0.974679	0.00481823	2.31711	Exposome (biological)	genus_Paraphaeosphaeria	Cytokine	MCSF
exposome_genus_Paraphaeosphaeria	FGFB	0.974679	0.00481823	2.31711	Exposome (biological)	genus_Paraphaeosphaeria	Cytokine	FGFB
exposome_genus_Paraphaeosphaeria	CHEX2	0.974679	0.00481823	2.31711	Exposome (biological)	genus_Paraphaeosphaeria	Cytokine	CHEX2
exposome_genus_Paraphoma	SCF	0.974679	0.00481823	2.31711	Exposome (biological)	genus_Paraphoma	Cytokine	SCF
exposome_genus_Paraphoma	PAI1	0.974679	0.00481823	2.31711	Exposome (biological)	genus_Paraphoma	Cytokine	PAI1
exposome_genus_Parastagonospora	IP10	0.974679	0.00481823	2.31711	Exposome (biological)	genus_Parastagonospora	Cytokine	IP10
exposome_genus_Parastagonospora	TGFB	0.974679	0.00481823	2.31711	Exposome (biological)	genus_Parastagonospora	Cytokine	TGFB
exposome_genus_Parastagonospora	MIG	0.974679	0.00481823	2.31711	Exposome (biological)	genus_Parastagonospora	Cytokine	MIG
exposome_genus_Parastagonospora	IL21	0.974679	0.00481823	2.31711	Exposome (biological)	genus_Parastagonospora	Cytokine	IL21
exposome_genus_Parastagonospora	VCAM1	0.974679	0.00481823	2.31711	Exposome (biological)	genus_Parastagonospora	Cytokine	VCAM1
exposome_genus_Parastagonospora	CHEX3	0.974679	0.00481823	2.31711	Exposome (biological)	genus_Parastagonospora	Cytokine	CHEX3
exposome_genus_Passalora	IL2	0.974679	0.00481823	2.31711	Exposome (biological)	genus_Passalora	Cytokine	IL2
exposome_genus_Passalora	MCP1	-0.974679	0.00481823	2.31711	Exposome (biological)	genus_Passalora	Cytokine	MCP1
exposome_genus_Pedobacter	IL2	1	0.0166667	1.77815	Exposome (biological)	genus_Pedobacter	Cytokine	IL2
exposome_genus_Pedobacter	MCP1	-1	0.0166667	1.77815	Exposome (biological)	genus_Pedobacter	Cytokine	MCP1
exposome_genus_Penicillium	IL9	1	0.0166667	1.77815	Exposome (biological)	genus_Penicillium	Cytokine	IL9
exposome_genus_Penicillium	PDGFBB	1	0.0166667	1.77815	Exposome (biological)	genus_Penicillium	Cytokine	PDGFBB
exposome_genus_Phellinus	IL23	1	0.0166667	1.77815	Exposome (biological)	genus_Phellinus	Cytokine	IL23
exposome_genus_Phytophthora	IL23	-0.974679	0.00481823	2.31711	Exposome (biological)	genus_Phytophthora	Cytokine	IL23
exposome_genus_Planomicrobium	IL23	-0.974679	0.00481823	2.31711	Exposome (biological)	genus_Planomicrobium	Cytokine	IL23
exposome_genus_Plicaturopsis	IL23	1	0.0166667	1.77815	Exposome (biological)	genus_Plicaturopsis	Cytokine	IL23
exposome_genus_Pontibacter	IL1B	-0.974679	0.00481823	2.31711	Exposome (biological)	genus_Pontibacter	Cytokine	IL1B
exposome_genus_Propionibacterium	IL17A	1	0.0166667	1.77815	Exposome (biological)	genus_Propionibacterium	Cytokine	IL17A
exposome_genus_Propionibacterium	MCP3	1	0.0166667	1.77815	Exposome (biological)	genus_Propionibacterium	Cytokine	MCP3
exposome_genus_Pseudogymnoascus	FASL	1	0.0166667	1.77815	Exposome (biological)	genus_Pseudogymnoascus	Cytokine	FASL
exposome_genus_Pseudogymnoascus	IL27	1	0.0166667	1.77815	Exposome (biological)	genus_Pseudogymnoascus	Cytokine	IL27
exposome_genus_Pseudogymnoascus	IL4	1	0.0166667	1.77815	Exposome (biological)	genus_Pseudogymnoascus	Cytokine	IL4
exposome_genus_Pseudogymnoascus	IL5	1	0.0166667	1.77815	Exposome (biological)	genus_Pseudogymnoascus	Cytokine	IL5
exposome_genus_Pseudogymnoascus	IL7	1	0.0166667	1.77815	Exposome (biological)	genus_Pseudogymnoascus	Cytokine	IL7
exposome_genus_Pseudogymnoascus	IFNB	1	0.0166667	1.77815	Exposome (biological)	genus_Pseudogymnoascus	Cytokine	IFNB
exposome_genus_Pseudogymnoascus	IL13	1	0.0166667	1.77815	Exposome (biological)	genus_Pseudogymnoascus	Cytokine	IL13
exposome_genus_Pseudogymnoascus	IL31	1	0.0166667	1.77815	Exposome (biological)	genus_Pseudogymnoascus	Cytokine	IL31
exposome_genus_Pseudogymnoascus	IFNG	1	0.0166667	1.77815	Exposome (biological)	genus_Pseudogymnoascus	Cytokine	IFNG
exposome_genus_Pseudogymnoascus	GCSF	1	0.0166667	1.77815	Exposome (biological)	genus_Pseudogymnoascus	Cytokine	GCSF
exposome_genus_Pseudotsuga	IL2	0.974679	0.00481823	2.31711	Exposome (biological)	genus_Pseudotsuga	Cytokine	IL2
exposome_genus_Pseudotsuga	MCP1	-0.974679	0.00481823	2.31711	Exposome (biological)	genus_Pseudotsuga	Cytokine	MCP1
exposome_genus_Pyrenochaeta	IL2	0.974679	0.00481823	2.31711	Exposome (biological)	genus_Pyrenochaeta	Cytokine	IL2
exposome_genus_Pyrenochaeta	MCP1	-0.974679	0.00481823	2.31711	Exposome (biological)	genus_Pyrenochaeta	Cytokine	MCP1
exposome_genus_Pyrenophora	IL1B	-1	0.0166667	1.77815	Exposome (biological)	genus_Pyrenophora	Cytokine	IL1B
exposome_genus_Rasamsonia	IL2	1	0.0166667	1.77815	Exposome (biological)	genus_Rasamsonia	Cytokine	IL2
exposome_genus_Rasamsonia	MCP1	-1	0.0166667	1.77815	Exposome (biological)	genus_Rasamsonia	Cytokine	MCP1
exposome_genus_Rosellinia	IL23	1	0.0166667	1.77815	Exposome (biological)	genus_Rosellinia	Cytokine	IL23
exposome_genus_Rubrobacter	SDF1A	-0.974679	0.00481823	2.31711	Exposome (biological)	genus_Rubrobacter	Cytokine	SDF1A
exposome_genus_Rubrobacter	SCF	-0.974679	0.00481823	2.31711	Exposome (biological)	genus_Rubrobacter	Cytokine	SCF
exposome_genus_Rubrobacter	IL1A	-0.974679	0.00481823	2.31711	Exposome (biological)	genus_Rubrobacter	Cytokine	IL1A
exposome_genus_Rubrobacter	RESISTIN	-0.974679	0.00481823	2.31711	Exposome (biological)	genus_Rubrobacter	Cytokine	RESISTIN
exposome_genus_Rubrobacter	PAI1	-0.974679	0.00481823	2.31711	Exposome (biological)	genus_Rubrobacter	Cytokine	PAI1
exposome_genus_Sarocladium	FASL	0.974679	0.00481823	2.31711	Exposome (biological)	genus_Sarocladium	Cytokine	FASL
exposome_genus_Sarocladium	IL27	0.974679	0.00481823	2.31711	Exposome (biological)	genus_Sarocladium	Cytokine	IL27
exposome_genus_Sarocladium	IL4	0.974679	0.00481823	2.31711	Exposome (biological)	genus_Sarocladium	Cytokine	IL4
exposome_genus_Sarocladium	IL5	0.974679	0.00481823	2.31711	Exposome (biological)	genus_Sarocladium	Cytokine	IL5
exposome_genus_Sarocladium	IL7	0.974679	0.00481823	2.31711	Exposome (biological)	genus_Sarocladium	Cytokine	IL7
exposome_genus_Sarocladium	IL8	0.974679	0.00481823	2.31711	Exposome (biological)	genus_Sarocladium	Cytokine	IL8
exposome_genus_Sarocladium	IFNB	0.974679	0.00481823	2.31711	Exposome (biological)	genus_Sarocladium	Cytokine	IFNB
exposome_genus_Sarocladium	IL13	0.974679	0.00481823	2.31711	Exposome (biological)	genus_Sarocladium	Cytokine	IL13
exposome_genus_Sarocladium	IL31	0.974679	0.00481823	2.31711	Exposome (biological)	genus_Sarocladium	Cytokine	IL31
exposome_genus_Sarocladium	IFNG	0.974679	0.00481823	2.31711	Exposome (biological)	genus_Sarocladium	Cytokine	IFNG
exposome_genus_Sarocladium	GMCSF	0.974679	0.00481823	2.31711	Exposome (biological)	genus_Sarocladium	Cytokine	GMCSF
exposome_genus_Sarocladium	GCSF	0.974679	0.00481823	2.31711	Exposome (biological)	genus_Sarocladium	Cytokine	GCSF
exposome_genus_Sediminibacterium	GROA	-0.974679	0.00481823	2.31711	Exposome (biological)	genus_Sediminibacterium	Cytokine	GROA
exposome_genus_Sediminibacterium	CHEX4	0.974679	0.00481823	2.31711	Exposome (biological)	genus_Sediminibacterium	Cytokine	CHEX4
exposome_genus_Serpula	BDNF	-0.974679	0.00481823	2.31711	Exposome (biological)	genus_Serpula	Cytokine	BDNF
exposome_genus_Serpula	CHEX1	0.974679	0.00481823	2.31711	Exposome (biological)	genus_Serpula	Cytokine	CHEX1
exposome_genus_Sistotremastrum	GROA	1	0.0166667	1.77815	Exposome (biological)	genus_Sistotremastrum	Cytokine	GROA
exposome_genus_Sphingobacterium	SCF	0.974679	0.00481823	2.31711	Exposome (biological)	genus_Sphingobacterium	Cytokine	SCF
exposome_genus_Sphingobacterium	PAI1	0.974679	0.00481823	2.31711	Exposome (biological)	genus_Sphingobacterium	Cytokine	PAI1
exposome_genus_Spirosoma	IL6	1	0.0166667	1.77815	Exposome (biological)	genus_Spirosoma	Cytokine	IL6
exposome_genus_Spirosoma	NGF	1	0.0166667	1.77815	Exposome (biological)	genus_Spirosoma	Cytokine	NGF
exposome_genus_Spirosoma	IL12P40	1	0.0166667	1.77815	Exposome (biological)	genus_Spirosoma	Cytokine	IL12P40
exposome_genus_Spirosoma	IL15	1	0.0166667	1.77815	Exposome (biological)	genus_Spirosoma	Cytokine	IL15
exposome_genus_Spirosoma	ICAM1	1	0.0166667	1.77815	Exposome (biological)	genus_Spirosoma	Cytokine	ICAM1
exposome_genus_Sporosarcina	IP10	0.974679	0.00481823	2.31711	Exposome (biological)	genus_Sporosarcina	Cytokine	IP10
exposome_genus_Sporosarcina	TGFB	0.974679	0.00481823	2.31711	Exposome (biological)	genus_Sporosarcina	Cytokine	TGFB
exposome_genus_Sporosarcina	MIG	0.974679	0.00481823	2.31711	Exposome (biological)	genus_Sporosarcina	Cytokine	MIG
exposome_genus_Sporosarcina	IL21	0.974679	0.00481823	2.31711	Exposome (biological)	genus_Sporosarcina	Cytokine	IL21
exposome_genus_Sporosarcina	VCAM1	0.974679	0.00481823	2.31711	Exposome (biological)	genus_Sporosarcina	Cytokine	VCAM1
exposome_genus_Sporosarcina	CHEX3	0.974679	0.00481823	2.31711	Exposome (biological)	genus_Sporosarcina	Cytokine	CHEX3
exposome_genus_Sporothrix	MIP1A	0.974679	0.00481823	2.31711	Exposome (biological)	genus_Sporothrix	Cytokine	MIP1A
exposome_genus_Sporothrix	IL10	0.974679	0.00481823	2.31711	Exposome (biological)	genus_Sporothrix	Cytokine	IL10
exposome_genus_Sporothrix	IL1RA	0.974679	0.00481823	2.31711	Exposome (biological)	genus_Sporothrix	Cytokine	IL1RA
exposome_genus_Sporothrix	RANTES	0.974679	0.00481823	2.31711	Exposome (biological)	genus_Sporothrix	Cytokine	RANTES
exposome_genus_Sporothrix	TNFA	0.974679	0.00481823	2.31711	Exposome (biological)	genus_Sporothrix	Cytokine	TNFA
exposome_genus_Sporothrix	MIP1B	0.974679	0.00481823	2.31711	Exposome (biological)	genus_Sporothrix	Cytokine	MIP1B
exposome_genus_Sporothrix	TRAIL	0.974679	0.00481823	2.31711	Exposome (biological)	genus_Sporothrix	Cytokine	TRAIL
exposome_genus_Sporothrix	IL18	0.974679	0.00481823	2.31711	Exposome (biological)	genus_Sporothrix	Cytokine	IL18
exposome_genus_Sporothrix	MCSF	0.974679	0.00481823	2.31711	Exposome (biological)	genus_Sporothrix	Cytokine	MCSF
exposome_genus_Sporothrix	FGFB	0.974679	0.00481823	2.31711	Exposome (biological)	genus_Sporothrix	Cytokine	FGFB
exposome_genus_Sporothrix	CHEX2	0.974679	0.00481823	2.31711	Exposome (biological)	genus_Sporothrix	Cytokine	CHEX2
exposome_genus_Staphylococcus	IL8	1	0.0166667	1.77815	Exposome (biological)	genus_Staphylococcus	Cytokine	IL8
exposome_genus_Staphylococcus	GMCSF	1	0.0166667	1.77815	Exposome (biological)	genus_Staphylococcus	Cytokine	GMCSF
exposome_genus_Stereum	LIF	-1	0.0166667	1.77815	Exposome (biological)	genus_Stereum	Cytokine	LIF
exposome_genus_Talaromyces	IL6	1	0.0166667	1.77815	Exposome (biological)	genus_Talaromyces	Cytokine	IL6
exposome_genus_Talaromyces	NGF	1	0.0166667	1.77815	Exposome (biological)	genus_Talaromyces	Cytokine	NGF
exposome_genus_Talaromyces	IL12P40	1	0.0166667	1.77815	Exposome (biological)	genus_Talaromyces	Cytokine	IL12P40
exposome_genus_Talaromyces	IL15	1	0.0166667	1.77815	Exposome (biological)	genus_Talaromyces	Cytokine	IL15
exposome_genus_Talaromyces	ICAM1	1	0.0166667	1.77815	Exposome (biological)	genus_Talaromyces	Cytokine	ICAM1
exposome_genus_Taphrina	IL2	0.974679	0.00481823	2.31711	Exposome (biological)	genus_Taphrina	Cytokine	IL2
exposome_genus_Taphrina	MCP1	-0.974679	0.00481823	2.31711	Exposome (biological)	genus_Taphrina	Cytokine	MCP1
exposome_genus_Tarenaya	BDNF	-0.974679	0.00481823	2.31711	Exposome (biological)	genus_Tarenaya	Cytokine	BDNF
exposome_genus_Tarenaya	CHEX1	0.974679	0.00481823	2.31711	Exposome (biological)	genus_Tarenaya	Cytokine	CHEX1
exposome_genus_Terrimonas	TGFB	1	0.0166667	1.77815	Exposome (biological)	genus_Terrimonas	Cytokine	TGFB
exposome_genus_Terrimonas	MIG	1	0.0166667	1.77815	Exposome (biological)	genus_Terrimonas	Cytokine	MIG
exposome_genus_Terrimonas	VCAM1	1	0.0166667	1.77815	Exposome (biological)	genus_Terrimonas	Cytokine	VCAM1
exposome_genus_Thermoactinomyces	FASL	1	0.0166667	1.77815	Exposome (biological)	genus_Thermoactinomyces	Cytokine	FASL
exposome_genus_Thermoactinomyces	IL27	1	0.0166667	1.77815	Exposome (biological)	genus_Thermoactinomyces	Cytokine	IL27
exposome_genus_Thermoactinomyces	IL4	1	0.0166667	1.77815	Exposome (biological)	genus_Thermoactinomyces	Cytokine	IL4
exposome_genus_Thermoactinomyces	IL5	1	0.0166667	1.77815	Exposome (biological)	genus_Thermoactinomyces	Cytokine	IL5
exposome_genus_Thermoactinomyces	IL7	1	0.0166667	1.77815	Exposome (biological)	genus_Thermoactinomyces	Cytokine	IL7
exposome_genus_Thermoactinomyces	IFNB	1	0.0166667	1.77815	Exposome (biological)	genus_Thermoactinomyces	Cytokine	IFNB
exposome_genus_Thermoactinomyces	IL13	1	0.0166667	1.77815	Exposome (biological)	genus_Thermoactinomyces	Cytokine	IL13
exposome_genus_Thermoactinomyces	IL31	1	0.0166667	1.77815	Exposome (biological)	genus_Thermoactinomyces	Cytokine	IL31
exposome_genus_Thermoactinomyces	IFNG	1	0.0166667	1.77815	Exposome (biological)	genus_Thermoactinomyces	Cytokine	IFNG
exposome_genus_Thermoactinomyces	GCSF	1	0.0166667	1.77815	Exposome (biological)	genus_Thermoactinomyces	Cytokine	GCSF
exposome_genus_Thermoascus	IL23	0.974679	0.00481823	2.31711	Exposome (biological)	genus_Thermoascus	Cytokine	IL23
exposome_genus_Thermomucor	EGF	-0.974679	0.00481823	2.31711	Exposome (biological)	genus_Thermomucor	Cytokine	EGF
exposome_genus_Thermomucor	CD40L	-0.974679	0.00481823	2.31711	Exposome (biological)	genus_Thermomucor	Cytokine	CD40L
exposome_genus_Thielavia	IL2	0.974679	0.00481823	2.31711	Exposome (biological)	genus_Thielavia	Cytokine	IL2
exposome_genus_Thielavia	MCP1	-0.974679	0.00481823	2.31711	Exposome (biological)	genus_Thielavia	Cytokine	MCP1
exposome_genus_Tolypocladium	IL2	0.974679	0.00481823	2.31711	Exposome (biological)	genus_Tolypocladium	Cytokine	IL2
exposome_genus_Tolypocladium	MCP1	-0.974679	0.00481823	2.31711	Exposome (biological)	genus_Tolypocladium	Cytokine	MCP1
exposome_genus_Venturia	IL23	0.974679	0.00481823	2.31711	Exposome (biological)	genus_Venturia	Cytokine	IL23
exposome_genus_Wallemia	FASL	0.974679	0.00481823	2.31711	Exposome (biological)	genus_Wallemia	Cytokine	FASL
exposome_genus_Wallemia	IL27	0.974679	0.00481823	2.31711	Exposome (biological)	genus_Wallemia	Cytokine	IL27
exposome_genus_Wallemia	IL4	0.974679	0.00481823	2.31711	Exposome (biological)	genus_Wallemia	Cytokine	IL4
exposome_genus_Wallemia	IL5	0.974679	0.00481823	2.31711	Exposome (biological)	genus_Wallemia	Cytokine	IL5
exposome_genus_Wallemia	IL7	0.974679	0.00481823	2.31711	Exposome (biological)	genus_Wallemia	Cytokine	IL7
exposome_genus_Wallemia	IL8	0.974679	0.00481823	2.31711	Exposome (biological)	genus_Wallemia	Cytokine	IL8
exposome_genus_Wallemia	IFNB	0.974679	0.00481823	2.31711	Exposome (biological)	genus_Wallemia	Cytokine	IFNB
exposome_genus_Wallemia	IL13	0.974679	0.00481823	2.31711	Exposome (biological)	genus_Wallemia	Cytokine	IL13
exposome_genus_Wallemia	IL31	0.974679	0.00481823	2.31711	Exposome (biological)	genus_Wallemia	Cytokine	IL31
exposome_genus_Wallemia	IFNG	0.974679	0.00481823	2.31711	Exposome (biological)	genus_Wallemia	Cytokine	IFNG
exposome_genus_Wallemia	GMCSF	0.974679	0.00481823	2.31711	Exposome (biological)	genus_Wallemia	Cytokine	GMCSF
exposome_genus_Wallemia	GCSF	0.974679	0.00481823	2.31711	Exposome (biological)	genus_Wallemia	Cytokine	GCSF
exposome_genus_Xeromyces	IL17F	-0.974679	0.00481823	2.31711	Exposome (biological)	genus_Xeromyces	Cytokine	IL17F
exposome_genus_Xeromyces	IL8	-0.974679	0.00481823	2.31711	Exposome (biological)	genus_Xeromyces	Cytokine	IL8
exposome_genus_Xeromyces	IL12P70	-0.974679	0.00481823	2.31711	Exposome (biological)	genus_Xeromyces	Cytokine	IL12P70
exposome_genus_Xeromyces	GMCSF	-0.974679	0.00481823	2.31711	Exposome (biological)	genus_Xeromyces	Cytokine	GMCSF
exposome_genus_Xeromyces	VEGFD	-0.974679	0.00481823	2.31711	Exposome (biological)	genus_Xeromyces	Cytokine	VEGFD
exposome_genus_Xeromyces	TNFB	-0.974679	0.00481823	2.31711	Exposome (biological)	genus_Xeromyces	Cytokine	TNFB
exposome_genus_Xeromyces	IL22	-0.974679	0.00481823	2.31711	Exposome (biological)	genus_Xeromyces	Cytokine	IL22
exposome_genus_Xeromyces	VEGF	-0.974679	0.00481823	2.31711	Exposome (biological)	genus_Xeromyces	Cytokine	VEGF
exposome_genus_Xeromyces	LEPTIN	-0.974679	0.00481823	2.31711	Exposome (biological)	genus_Xeromyces	Cytokine	LEPTIN
exposome_genus_Acremonium	phylum_unclassified_Bacteria	-0.974679	0.00481823	2.31711	Exposome (biological)	genus_Acremonium	Gut microbiome	phylum_unclassified_Bacteria
exposome_genus_Acremonium	class_unclassified_Bacteria	-0.974679	0.00481823	2.31711	Exposome (biological)	genus_Acremonium	Gut microbiome	class_unclassified_Bacteria
exposome_genus_Acremonium	order_unclassified_Bacteria	-0.974679	0.00481823	2.31711	Exposome (biological)	genus_Acremonium	Gut microbiome	order_unclassified_Bacteria
exposome_genus_Acremonium	family_unclassified_Bacteria	-0.974679	0.00481823	2.31711	Exposome (biological)	genus_Acremonium	Gut microbiome	family_unclassified_Bacteria
exposome_genus_Acremonium	genus_unclassified_Bacteria	-0.974679	0.00481823	2.31711	Exposome (biological)	genus_Acremonium	Gut microbiome	genus_unclassified_Bacteria
exposome_genus_Actinoplanes	family_Prevotellaceae	0.974679	0.00481823	2.31711	Exposome (biological)	genus_Actinoplanes	Gut microbiome	family_Prevotellaceae
exposome_genus_Actinoplanes	genus_Faecalibacterium	0.974679	0.00481823	2.31711	Exposome (biological)	genus_Actinoplanes	Gut microbiome	genus_Faecalibacterium
exposome_genus_Adhaeribacter	class_Bacilli	-1	0.0166667	1.77815	Exposome (biological)	genus_Adhaeribacter	Gut microbiome	class_Bacilli
exposome_genus_Adhaeribacter	order_Lactobacillales	-1	0.0166667	1.77815	Exposome (biological)	genus_Adhaeribacter	Gut microbiome	order_Lactobacillales
exposome_genus_Adhaeribacter	family_Streptococcaceae	-1	0.0166667	1.77815	Exposome (biological)	genus_Adhaeribacter	Gut microbiome	family_Streptococcaceae
exposome_genus_Albophoma	genus_unclassified_Erysipelotrichaceae	-0.917663	0.0280085	1.55271	Exposome (biological)	genus_Albophoma	Gut microbiome	genus_unclassified_Erysipelotrichaceae
exposome_genus_Aliterella	genus_unclassified_Coriobacteriaceae	-0.974679	0.00481823	2.31711	Exposome (biological)	genus_Aliterella	Gut microbiome	genus_unclassified_Coriobacteriaceae
exposome_genus_Alkanindiges	genus_Faecalibacterium	1	0.0166667	1.77815	Exposome (biological)	genus_Alkanindiges	Gut microbiome	genus_Faecalibacterium
exposome_genus_Alternaria	family_Prevotellaceae	0.974679	0.00481823	2.31711	Exposome (biological)	genus_Alternaria	Gut microbiome	family_Prevotellaceae
exposome_genus_Alternaria	genus_Faecalibacterium	0.974679	0.00481823	2.31711	Exposome (biological)	genus_Alternaria	Gut microbiome	genus_Faecalibacterium
exposome_genus_Amanita	family_Peptostreptococcaceae	1	0.0166667	1.77815	Exposome (biological)	genus_Amanita	Gut microbiome	family_Peptostreptococcaceae
exposome_genus_Amanita	family_unclassified_Clostridiales	-1	0.0166667	1.77815	Exposome (biological)	genus_Amanita	Gut microbiome	family_unclassified_Clostridiales
exposome_genus_Amanita	genus_Clostridium.XI	1	0.0166667	1.77815	Exposome (biological)	genus_Amanita	Gut microbiome	genus_Clostridium.XI
exposome_genus_Amanita	genus_Clostridium.XlVa	1	0.0166667	1.77815	Exposome (biological)	genus_Amanita	Gut microbiome	genus_Clostridium.XlVa
exposome_genus_Amanita	genus_unclassified_Clostridiales	-1	0.0166667	1.77815	Exposome (biological)	genus_Amanita	Gut microbiome	genus_unclassified_Clostridiales
exposome_genus_Amorphotheca	genus_Faecalibacterium	-1	0.0166667	1.77815	Exposome (biological)	genus_Amorphotheca	Gut microbiome	genus_Faecalibacterium
exposome_genus_Anabaena	family_Peptostreptococcaceae	-0.974679	0.00481823	2.31711	Exposome (biological)	genus_Anabaena	Gut microbiome	family_Peptostreptococcaceae
exposome_genus_Anabaena	family_unclassified_Clostridiales	0.974679	0.00481823	2.31711	Exposome (biological)	genus_Anabaena	Gut microbiome	family_unclassified_Clostridiales
exposome_genus_Anabaena	genus_Clostridium.XI	-0.974679	0.00481823	2.31711	Exposome (biological)	genus_Anabaena	Gut microbiome	genus_Clostridium.XI
exposome_genus_Anabaena	genus_Clostridium.XlVa	-0.974679	0.00481823	2.31711	Exposome (biological)	genus_Anabaena	Gut microbiome	genus_Clostridium.XlVa
exposome_genus_Anabaena	genus_unclassified_Clostridiales	0.974679	0.00481823	2.31711	Exposome (biological)	genus_Anabaena	Gut microbiome	genus_unclassified_Clostridiales
exposome_genus_Ananas	genus_Butyricicoccus	0.974679	0.00481823	2.31711	Exposome (biological)	genus_Ananas	Gut microbiome	genus_Butyricicoccus
exposome_genus_Ananas	genus_Clostridium.XlVb	-0.974679	0.00481823	2.31711	Exposome (biological)	genus_Ananas	Gut microbiome	genus_Clostridium.XlVb
exposome_genus_Anoxybacillus	class_unclassified_Firmicutes	-0.974679	0.00481823	2.31711	Exposome (biological)	genus_Anoxybacillus	Gut microbiome	class_unclassified_Firmicutes
exposome_genus_Anoxybacillus	order_unclassified_Firmicutes	-0.974679	0.00481823	2.31711	Exposome (biological)	genus_Anoxybacillus	Gut microbiome	order_unclassified_Firmicutes
exposome_genus_Anoxybacillus	family_Clostridiales_Incertae.Sedis.XIII	-0.974679	0.00481823	2.31711	Exposome (biological)	genus_Anoxybacillus	Gut microbiome	family_Clostridiales_Incertae.Sedis.XIII
exposome_genus_Anoxybacillus	family_unclassified_Firmicutes	-0.974679	0.00481823	2.31711	Exposome (biological)	genus_Anoxybacillus	Gut microbiome	family_unclassified_Firmicutes
exposome_genus_Anoxybacillus	genus_Anaerovorax	-0.974679	0.00481823	2.31711	Exposome (biological)	genus_Anoxybacillus	Gut microbiome	genus_Anaerovorax
exposome_genus_Anoxybacillus	genus_unclassified_Firmicutes	-0.974679	0.00481823	2.31711	Exposome (biological)	genus_Anoxybacillus	Gut microbiome	genus_unclassified_Firmicutes
exposome_genus_Anthracocystis	class_Bacilli	1	0.0166667	1.77815	Exposome (biological)	genus_Anthracocystis	Gut microbiome	class_Bacilli
exposome_genus_Anthracocystis	order_Lactobacillales	1	0.0166667	1.77815	Exposome (biological)	genus_Anthracocystis	Gut microbiome	order_Lactobacillales
exposome_genus_Anthracocystis	family_Streptococcaceae	1	0.0166667	1.77815	Exposome (biological)	genus_Anthracocystis	Gut microbiome	family_Streptococcaceae
exposome_genus_Arcticibacter	genus_Bilophila	-0.974679	0.00481823	2.31711	Exposome (biological)	genus_Arcticibacter	Gut microbiome	genus_Bilophila
exposome_genus_Ascocoryne	phylum_Bacteroidetes	1	0.0166667	1.77815	Exposome (biological)	genus_Ascocoryne	Gut microbiome	phylum_Bacteroidetes
exposome_genus_Ascocoryne	class_Bacteroidia	1	0.0166667	1.77815	Exposome (biological)	genus_Ascocoryne	Gut microbiome	class_Bacteroidia
exposome_genus_Ascocoryne	order_Bacteroidales	1	0.0166667	1.77815	Exposome (biological)	genus_Ascocoryne	Gut microbiome	order_Bacteroidales
exposome_genus_Ascocoryne	family_Bacteroidaceae	1	0.0166667	1.77815	Exposome (biological)	genus_Ascocoryne	Gut microbiome	family_Bacteroidaceae
exposome_genus_Ascocoryne	genus_Bacteroides	1	0.0166667	1.77815	Exposome (biological)	genus_Ascocoryne	Gut microbiome	genus_Bacteroides
exposome_genus_Ascocoryne	genus_unclassified_Clostridiales_Incertae.Sedis.XIII	-1	0.0166667	1.77815	Exposome (biological)	genus_Ascocoryne	Gut microbiome	genus_unclassified_Clostridiales_Incertae.Sedis.XIII
exposome_genus_Athelia	family_Peptostreptococcaceae	0.974679	0.00481823	2.31711	Exposome (biological)	genus_Athelia	Gut microbiome	family_Peptostreptococcaceae
exposome_genus_Athelia	family_unclassified_Clostridiales	-0.974679	0.00481823	2.31711	Exposome (biological)	genus_Athelia	Gut microbiome	family_unclassified_Clostridiales
exposome_genus_Athelia	genus_Clostridium.XI	0.974679	0.00481823	2.31711	Exposome (biological)	genus_Athelia	Gut microbiome	genus_Clostridium.XI
exposome_genus_Athelia	genus_Clostridium.XlVa	0.974679	0.00481823	2.31711	Exposome (biological)	genus_Athelia	Gut microbiome	genus_Clostridium.XlVa
exposome_genus_Athelia	genus_Dorea	-0.974679	0.00481823	2.31711	Exposome (biological)	genus_Athelia	Gut microbiome	genus_Dorea
exposome_genus_Athelia	genus_unclassified_Clostridiales	-0.974679	0.00481823	2.31711	Exposome (biological)	genus_Athelia	Gut microbiome	genus_unclassified_Clostridiales
exposome_genus_Bacillus	phylum_Verrucomicrobia	1	0.0166667	1.77815	Exposome (biological)	genus_Bacillus	Gut microbiome	phylum_Verrucomicrobia
exposome_genus_Bacillus	class_Verrucomicrobiae	1	0.0166667	1.77815	Exposome (biological)	genus_Bacillus	Gut microbiome	class_Verrucomicrobiae
exposome_genus_Bacillus	order_Verrucomicrobiales	1	0.0166667	1.77815	Exposome (biological)	genus_Bacillus	Gut microbiome	order_Verrucomicrobiales
exposome_genus_Bacillus	family_Verrucomicrobiaceae	1	0.0166667	1.77815	Exposome (biological)	genus_Bacillus	Gut microbiome	family_Verrucomicrobiaceae
[truncated: 6,988 more rows]
