# Supplementary material for: Precision environmental health monitoring by longitudinal exposome and multi-omics profiling
Source: Genome Res. 2022 Jun;32(6):1199–214. doi: 10.1101/gr.276521.121 (PMC9248886; doi:10.1101/gr.276521.121)
Supplement: Supplemental Material [file supp_gr.276521.121_Supplemental_Data_S5.xlsx]

## Sheet: GO
Supplemental Data S5. Pathway enrichment results for proteins connected with the chemical exposome.
ONTOLOGY	ID	Description	GeneRatio	BgRatio	pvalue	p.adjust	qvalue	geneID	Count	geneName
BP	GO:0072376	protein activation cascade	26/96	198/18670	9.25141e-30	1.68191e-26	1.39258e-26	1675/2158/2244/7448/5627/51279/725/81494/922/5199/713/714/7450/2155/718/2243/720/78989/735/2811/1191/3080/629/727/8547/730	26	CFD/F9/FGB/VTN/PROS1/C1RL/C4BPB/CFHR5/CD5L/CFP/C1QB/C1QC/VWF/F7/C3/FGA/C4A/COLEC11/C9/GP1BA/CLU/CFHR2/CFB/C5/FCN3/C7
BP	GO:0002576	platelet degranulation	22/96	128/18670	6.57123e-28	5.97325e-25	4.94572e-25	1675/10447/2244/7123/5627/22915/1/7414/5265/335/2335/5473/7450/1893/7273/2243/197/3699/5345/1191/3481/5005	22	CFD/FAM3C/FGB/CLEC3B/PROS1/MMRN1/A1BG/VCL/SERPINA1/APOA1/FN1/PPBP/VWF/ECM1/TTN/FGA/AHSG/ITIH3/SERPINF2/CLU/IGF2/ORM2
BP	GO:0002526	acute inflammatory response	23/96	220/18670	5.4758e-24	2.63063e-21	2.1781e-21	7448/5627/725/5265/336/81494/922/5199/713/714/2335/718/197/720/735/5345/1191/3080/3250/629/727/5005/730	23	VTN/PROS1/C4BPB/SERPINA1/APOA2/CFHR5/CD5L/CFP/C1QB/C1QC/FN1/C3/AHSG/C4A/C9/SERPINF2/CLU/CFHR2/HPR/CFB/C5/ORM2/C7
BP	GO:0016485	protein processing	26/96	328/18670	5.78796e-24	2.63063e-21	2.1781e-21	2158/2244/7448/7123/5627/51279/725/10939/81494/922/5199/1311/713/714/2155/718/2243/720/735/5345/1191/3080/629/2934/727/730	26	F9/FGB/VTN/CLEC3B/PROS1/C1RL/C4BPB/AFG3L2/CFHR5/CD5L/CFP/COMP/C1QB/C1QC/F7/C3/FGA/C4A/C9/SERPINF2/CLU/CFHR2/CFB/GSN/C5/C7
BP	GO:0051604	protein maturation	26/96	397/18670	7.70243e-22	2.74737e-19	2.27476e-19	2158/2244/7448/7123/5627/51279/725/10939/81494/922/5199/1311/713/714/2155/718/2243/720/735/5345/1191/3080/629/2934/727/730	26	F9/FGB/VTN/CLEC3B/PROS1/C1RL/C4BPB/AFG3L2/CFHR5/CD5L/CFP/COMP/C1QB/C1QC/F7/C3/FGA/C4A/C9/SERPINF2/CLU/CFHR2/CFB/GSN/C5/C7
BP	GO:0006959	humoral immune response	25/96	356/18670	9.65261e-22	2.74737e-19	2.27476e-19	1675/2244/7448/5627/51279/725/81494/922/5199/713/714/5473/3263/718/2243/720/78989/735/1191/3080/629/2597/727/8547/730	25	CFD/FGB/VTN/PROS1/C1RL/C4BPB/CFHR5/CD5L/CFP/C1QB/C1QC/PPBP/HPX/C3/FGA/C4A/COLEC11/C9/CLU/CFHR2/CFB/GAPDH/C5/FCN3/C7
BP	GO:0006956	complement activation	20/96	175/18670	1.05785e-21	2.74737e-19	2.27476e-19	1675/7448/5627/51279/725/81494/922/5199/713/714/718/720/78989/735/1191/3080/629/727/8547/730	20	CFD/VTN/PROS1/C1RL/C4BPB/CFHR5/CD5L/CFP/C1QB/C1QC/C3/C4A/COLEC11/C9/CLU/CFHR2/CFB/C5/FCN3/C7
BP	GO:0070613	regulation of protein processing	19/96	180/18670	5.6054e-20	1.27383e-17	1.0547e-17	7448/7123/5627/725/81494/922/5199/713/714/718/720/735/5345/1191/3080/629/2934/727/730	19	VTN/CLEC3B/PROS1/C4BPB/CFHR5/CD5L/CFP/C1QB/C1QC/C3/C4A/C9/SERPINF2/CLU/CFHR2/CFB/GSN/C5/C7
BP	GO:1903317	regulation of protein maturation	19/96	182/18670	6.93774e-20	1.40142e-17	1.16035e-17	7448/7123/5627/725/81494/922/5199/713/714/718/720/735/5345/1191/3080/629/2934/727/730	19	VTN/CLEC3B/PROS1/C4BPB/CFHR5/CD5L/CFP/C1QB/C1QC/C3/C4A/C9/SERPINF2/CLU/CFHR2/CFB/GSN/C5/C7
BP	GO:0002920	regulation of humoral immune response	17/96	134/18670	2.42091e-19	4.40122e-17	3.64411e-17	7448/5627/725/81494/922/5199/713/714/3263/718/720/735/1191/3080/629/727/730	17	VTN/PROS1/C4BPB/CFHR5/CD5L/CFP/C1QB/C1QC/HPX/C3/C4A/C9/CLU/CFHR2/CFB/C5/C7
BP	GO:0030449	regulation of complement activation	16/96	115/18670	6.41855e-19	1.06081e-16	8.78328e-17	7448/5627/725/81494/922/5199/713/714/718/720/735/1191/3080/629/727/730	16	VTN/PROS1/C4BPB/CFHR5/CD5L/CFP/C1QB/C1QC/C3/C4A/C9/CLU/CFHR2/CFB/C5/C7
BP	GO:2000257	regulation of protein activation cascade	16/96	116/18670	7.41536e-19	1.12343e-16	9.30172e-17	7448/5627/725/81494/922/5199/713/714/718/720/735/1191/3080/629/727/730	16	VTN/PROS1/C4BPB/CFHR5/CD5L/CFP/C1QB/C1QC/C3/C4A/C9/CLU/CFHR2/CFB/C5/C7
BP	GO:0002673	regulation of acute inflammatory response	16/96	159/18670	1.30936e-16	1.83109e-14	1.5161e-14	7448/5627/725/81494/922/5199/713/714/718/720/735/1191/3080/629/727/730	16	VTN/PROS1/C4BPB/CFHR5/CD5L/CFP/C1QB/C1QC/C3/C4A/C9/CLU/CFHR2/CFB/C5/C7
BP	GO:0010466	negative regulation of peptidase activity	18/96	262/18670	1.27721e-15	1.65854e-13	1.37324e-13	5104/7448/6906/5627/1293/3698/5265/1471/1893/51156/718/197/720/3699/3053/5345/2597/727	18	SERPINA5/VTN/SERPINA7/PROS1/COL6A3/ITIH2/SERPINA1/CST3/ECM1/SERPINA10/C3/AHSG/C4A/ITIH3/SERPIND1/SERPINF2/GAPDH/C5
BP	GO:0006957	complement activation, alternative pathway	8/96	16/18670	4.51388e-15	5.47082e-13	4.52971e-13	1675/81494/5199/718/735/629/727/730	8	CFD/CFHR5/CFP/C3/C9/CFB/C5/C7
BP	GO:0007596	blood coagulation	19/96	336/18670	6.79698e-15	7.72307e-13	6.39453e-13	5104/2158/2244/7448/5627/8858/22915/7414/725/5265/1311/5624/7450/2155/51156/2243/3053/2811/5345	19	SERPINA5/F9/FGB/VTN/PROS1/PROZ/MMRN1/VCL/C4BPB/SERPINA1/COMP/PROC/VWF/F7/SERPINA10/FGA/SERPIND1/GP1BA/SERPINF2
BP	GO:0007599	hemostasis	19/96	341/18670	8.89041e-15	9.46973e-13	7.84072e-13	5104/2158/2244/7448/5627/8858/22915/7414/725/5265/1311/5624/7450/2155/51156/2243/3053/2811/5345	19	SERPINA5/F9/FGB/VTN/PROS1/PROZ/MMRN1/VCL/C4BPB/SERPINA1/COMP/PROC/VWF/F7/SERPINA10/FGA/SERPIND1/GP1BA/SERPINF2
BP	GO:0050817	coagulation	19/96	342/18670	9.37597e-15	9.46973e-13	7.84072e-13	5104/2158/2244/7448/5627/8858/22915/7414/725/5265/1311/5624/7450/2155/51156/2243/3053/2811/5345	19	SERPINA5/F9/FGB/VTN/PROS1/PROZ/MMRN1/VCL/C4BPB/SERPINA1/COMP/PROC/VWF/F7/SERPINA10/FGA/SERPIND1/GP1BA/SERPINF2
BP	GO:0010951	negative regulation of endopeptidase activity	17/96	250/18670	1.00776e-14	9.64271e-13	7.98395e-13	5104/7448/6906/5627/1293/3698/5265/1471/51156/718/197/720/3699/3053/5345/2597/727	17	SERPINA5/VTN/SERPINA7/PROS1/COL6A3/ITIH2/SERPINA1/CST3/SERPINA10/C3/AHSG/C4A/ITIH3/SERPIND1/SERPINF2/GAPDH/C5
BP	GO:0052547	regulation of peptidase activity	21/96	452/18670	1.07304e-14	9.75397e-13	8.07607e-13	5104/7448/6906/5627/1293/3698/5265/5118/1471/2335/1893/51156/718/197/720/3699/3053/5345/2597/2934/727	21	SERPINA5/VTN/SERPINA7/PROS1/COL6A3/ITIH2/SERPINA1/PCOLCE/CST3/FN1/ECM1/SERPINA10/C3/AHSG/C4A/ITIH3/SERPIND1/SERPINF2/GAPDH/GSN/C5
BP	GO:0051346	negative regulation of hydrolase activity	21/96	466/18670	1.95539e-14	1.69281e-12	1.40161e-12	341/5104/7448/6906/5627/1293/3698/5265/335/336/1471/1893/51156/718/197/720/3699/3053/5345/2597/727	21	APOC1/SERPINA5/VTN/SERPINA7/PROS1/COL6A3/ITIH2/SERPINA1/APOA1/APOA2/CST3/ECM1/SERPINA10/C3/AHSG/C4A/ITIH3/SERPIND1/SERPINF2/GAPDH/C5
BP	GO:0045861	negative regulation of proteolysis	19/96	363/18670	2.757e-14	2.27828e-12	1.88637e-12	5104/7448/6906/5627/1293/3698/725/5265/1471/1893/51156/718/197/720/3699/3053/5345/2597/727	19	SERPINA5/VTN/SERPINA7/PROS1/COL6A3/ITIH2/C4BPB/SERPINA1/CST3/ECM1/SERPINA10/C3/AHSG/C4A/ITIH3/SERPIND1/SERPINF2/GAPDH/C5
BP	GO:0050727	regulation of inflammatory response	20/96	485/18670	4.63163e-13	3.661e-11	3.03123e-11	7448/5627/725/335/81494/922/5199/713/714/5624/347/718/197/720/735/1191/3080/629/727/730	20	VTN/PROS1/C4BPB/APOA1/CFHR5/CD5L/CFP/C1QB/C1QC/PROC/APOD/C3/AHSG/C4A/C9/CLU/CFHR2/CFB/C5/C7
BP	GO:0002697	regulation of immune effector process	19/96	458/18670	1.72861e-12	1.30942e-10	1.08417e-10	7448/5627/725/335/336/81494/922/5199/713/714/3263/718/720/735/1191/3080/629/727/730	19	VTN/PROS1/C4BPB/APOA1/APOA2/CFHR5/CD5L/CFP/C1QB/C1QC/HPX/C3/C4A/C9/CLU/CFHR2/CFB/C5/C7
BP	GO:0052548	regulation of endopeptidase activity	18/96	425/18670	5.05985e-12	3.67952e-10	3.04656e-10	5104/7448/6906/5627/1293/3698/5265/1471/51156/718/197/720/3699/3053/5345/2597/2934/727	18	SERPINA5/VTN/SERPINA7/PROS1/COL6A3/ITIH2/SERPINA1/CST3/SERPINA10/C3/AHSG/C4A/ITIH3/SERPIND1/SERPINF2/GAPDH/GSN/C5
BP	GO:1900046	regulation of hemostasis	9/96	80/18670	2.94247e-10	2.01988e-08	1.67241e-08	2244/7448/5627/1311/5624/2155/2243/2811/5345	9	FGB/VTN/PROS1/COMP/PROC/F7/FGA/GP1BA/SERPINF2
BP	GO:0002455	humoral immune response mediated by circulating immunoglobulin	11/96	150/18670	3.05542e-10	2.01988e-08	1.67241e-08	51279/725/713/714/3263/718/720/735/1191/727/730	11	C1RL/C4BPB/C1QB/C1QC/HPX/C3/C4A/C9/CLU/C5/C7
BP	GO:1900047	negative regulation of hemostasis	8/96	54/18670	3.11092e-10	2.01988e-08	1.67241e-08	2244/7448/5627/1311/5624/2243/2811/5345	8	FGB/VTN/PROS1/COMP/PROC/FGA/GP1BA/SERPINF2
BP	GO:0043312	neutrophil degranulation	17/96	485/18670	3.98091e-10	2.49562e-08	2.06632e-08	1675/1778/1/7414/5265/5199/80184/1471/5473/718/116844/197/6402/5284/1832/2934/5005	17	CFD/DYNC1H1/A1BG/VCL/SERPINA1/CFP/CEP290/CST3/PPBP/C3/LRG1/AHSG/SELL/PIGR/DSP/GSN/ORM2
BP	GO:0002283	neutrophil activation involved in immune response	17/96	488/18670	4.37484e-10	2.65115e-08	2.19509e-08	1675/1778/1/7414/5265/5199/80184/1471/5473/718/116844/197/6402/5284/1832/2934/5005	17	CFD/DYNC1H1/A1BG/VCL/SERPINA1/CFP/CEP290/CST3/PPBP/C3/LRG1/AHSG/SELL/PIGR/DSP/GSN/ORM2
BP	GO:0042119	neutrophil activation	17/96	498/18670	5.96339e-10	3.49316e-08	2.89226e-08	1675/1778/1/7414/5265/5199/80184/1471/5473/718/116844/197/6402/5284/1832/2934/5005	17	CFD/DYNC1H1/A1BG/VCL/SERPINA1/CFP/CEP290/CST3/PPBP/C3/LRG1/AHSG/SELL/PIGR/DSP/GSN/ORM2
BP	GO:0002446	neutrophil mediated immunity	17/96	499/18670	6.14858e-10	3.49316e-08	2.89226e-08	1675/1778/1/7414/5265/5199/80184/1471/5473/718/116844/197/6402/5284/1832/2934/5005	17	CFD/DYNC1H1/A1BG/VCL/SERPINA1/CFP/CEP290/CST3/PPBP/C3/LRG1/AHSG/SELL/PIGR/DSP/GSN/ORM2
BP	GO:0006958	complement activation, classical pathway	10/96	137/18670	2.14428e-09	1.18131e-07	9.78095e-08	51279/725/713/714/718/720/735/1191/727/730	10	C1RL/C4BPB/C1QB/C1QC/C3/C4A/C9/CLU/C5/C7
BP	GO:0072378	blood coagulation, fibrin clot formation	6/96	27/18670	4.28021e-09	2.28866e-07	1.89496e-07	2158/2244/7450/2155/2243/2811	6	F9/FGB/VWF/F7/FGA/GP1BA
BP	GO:0043687	post-translational protein modification	14/96	361/18670	4.53384e-09	2.35501e-07	1.94989e-07	3698/1356/5265/335/336/1471/2335/5624/51156/718/2243/197/720/3053	14	ITIH2/CP/SERPINA1/APOA1/APOA2/CST3/FN1/PROC/SERPINA10/C3/FGA/AHSG/C4A/SERPIND1
BP	GO:0030193	regulation of blood coagulation	8/96	79/18670	7.02305e-09	3.54664e-07	2.93654e-07	2244/7448/5627/5624/2155/2243/2811/5345	8	FGB/VTN/PROS1/PROC/F7/FGA/GP1BA/SERPINF2
BP	GO:0030195	negative regulation of blood coagulation	7/96	53/18670	9.67347e-09	4.75307e-07	3.93544e-07	2244/7448/5627/5624/2243/2811/5345	7	FGB/VTN/PROS1/PROC/FGA/GP1BA/SERPINF2
BP	GO:0050818	regulation of coagulation	8/96	84/18670	1.14919e-08	5.49799e-07	4.55221e-07	2244/7448/5627/5624/2155/2243/2811/5345	8	FGB/VTN/PROS1/PROC/F7/FGA/GP1BA/SERPINF2
BP	GO:0016064	immunoglobulin mediated immune response	11/96	218/18670	1.58066e-08	7.36829e-07	6.10077e-07	51279/725/713/714/3263/718/720/735/1191/727/730	11	C1RL/C4BPB/C1QB/C1QC/HPX/C3/C4A/C9/CLU/C5/C7
BP	GO:0050819	negative regulation of coagulation	7/96	57/18670	1.6317e-08	7.41607e-07	6.14034e-07	2244/7448/5627/5624/2243/2811/5345	7	FGB/VTN/PROS1/PROC/FGA/GP1BA/SERPINF2
BP	GO:0019724	B cell mediated immunity	11/96	221/18670	1.82052e-08	8.07244e-07	6.6838e-07	51279/725/713/714/3263/718/720/735/1191/727/730	11	C1RL/C4BPB/C1QB/C1QC/HPX/C3/C4A/C9/CLU/C5/C7
BP	GO:0043062	extracellular structure organization	14/96	422/18670	3.2494e-08	1.40653e-06	1.16457e-06	341/2244/7448/1293/335/336/1311/1471/2335/7450/2243/5345/3936/5360	14	APOC1/FGB/VTN/COL6A3/APOA1/APOA2/COMP/CST3/FN1/VWF/FGA/SERPINF2/LCP1/PLTP
BP	GO:0061045	negative regulation of wound healing	7/96	76/18670	1.24632e-07	5.26931e-06	4.36287e-06	2244/7448/5627/5624/2243/2811/5345	7	FGB/VTN/PROS1/PROC/FGA/GP1BA/SERPINF2
BP	GO:0042730	fibrinolysis	5/96	28/18670	2.89558e-07	1.1964e-05	9.90594e-06	2244/5627/2243/2811/5345	5	FGB/PROS1/FGA/GP1BA/SERPINF2
BP	GO:0031638	zymogen activation	6/96	53/18670	2.98112e-07	1.20437e-05	9.97194e-06	2158/2244/7123/51279/2243/5345	6	F9/FGB/CLEC3B/C1RL/FGA/SERPINF2
BP	GO:1903035	negative regulation of response to wounding	7/96	90/18670	4.01752e-07	1.58779e-05	1.31466e-05	2244/7448/5627/5624/2243/2811/5345	7	FGB/VTN/PROS1/PROC/FGA/GP1BA/SERPINF2
BP	GO:0061041	regulation of wound healing	8/96	148/18670	9.49031e-07	3.67093e-05	3.03945e-05	2244/7448/5627/5624/2155/2243/2811/5345	8	FGB/VTN/PROS1/PROC/F7/FGA/GP1BA/SERPINF2
BP	GO:0030100	regulation of endocytosis	10/96	281/18670	1.83527e-06	6.85057e-05	5.67212e-05	341/6457/7448/725/335/336/718/197/720/1191	10	APOC1/SH3GL3/VTN/C4BPB/APOA1/APOA2/C3/AHSG/C4A/CLU
BP	GO:0019835	cytolysis	5/96	40/18670	1.84641e-06	6.85057e-05	5.67212e-05	81494/735/3080/727/730	5	CFHR5/C9/CFHR2/C5/C7
BP	GO:0034375	high-density lipoprotein particle remodeling	4/96	18/18670	1.90058e-06	6.88602e-05	5.70147e-05	341/335/336/5360	4	APOC1/APOA1/APOA2/PLTP
BP	GO:0002449	lymphocyte mediated immunity	11/96	352/18670	1.93172e-06	6.88602e-05	5.70147e-05	51279/725/713/714/3263/718/720/735/1191/727/730	11	C1RL/C4BPB/C1QB/C1QC/HPX/C3/C4A/C9/CLU/C5/C7
BP	GO:0002460	adaptive immune response based on somatic recombination of immune receptors built from immunoglobulin superfamily domains	11/96	361/18670	2.46508e-06	8.6183e-05	7.13576e-05	51279/725/713/714/3263/718/720/735/1191/727/730	11	C1RL/C4BPB/C1QB/C1QC/HPX/C3/C4A/C9/CLU/C5/C7
BP	GO:0034109	homotypic cell-cell adhesion	6/96	81/18670	3.75394e-06	0.000128767	0.000106616	2244/7414/1311/2243/2811/1832	6	FGB/VCL/COMP/FGA/GP1BA/DSP
BP	GO:1903034	regulation of response to wounding	8/96	179/18670	3.94654e-06	0.000132867	0.000110011	2244/7448/5627/5624/2155/2243/2811/5345	8	FGB/VTN/PROS1/PROC/F7/FGA/GP1BA/SERPINF2
BP	GO:0006953	acute-phase response	5/96	47/18670	4.18373e-06	0.000138291	0.000114502	5265/2335/197/5345/5005	5	SERPINA1/FN1/AHSG/SERPINF2/ORM2
BP	GO:0006898	receptor-mediated endocytosis	10/96	316/18670	5.21643e-06	0.000169348	0.000140216	341/6457/7448/335/3263/718/3039/78989/1191/3250	10	APOC1/SH3GL3/VTN/APOA1/HPX/C3/HBA1/COLEC11/CLU/HPR
BP	GO:0031639	plasminogen activation	4/96	25/18670	7.64311e-06	0.000243775	0.00020184	2244/7123/2243/5345	4	FGB/CLEC3B/FGA/SERPINF2
BP	GO:0050764	regulation of phagocytosis	6/96	98/18670	1.13507e-05	0.000355784	0.000294581	725/335/336/718/197/720	6	C4BPB/APOA1/APOA2/C3/AHSG/C4A
BP	GO:0034368	protein-lipid complex remodeling	4/96	28/18670	1.22256e-05	0.000370436	0.000306712	341/335/336/5360	4	APOC1/APOA1/APOA2/PLTP
BP	GO:0034369	plasma lipoprotein particle remodeling	4/96	28/18670	1.22256e-05	0.000370436	0.000306712	341/335/336/5360	4	APOC1/APOA1/APOA2/PLTP
BP	GO:0070527	platelet aggregation	5/96	59/18670	1.30058e-05	0.000387616	0.000320937	2244/7414/1311/2243/2811	5	FGB/VCL/COMP/FGA/GP1BA
BP	GO:0045807	positive regulation of endocytosis	7/96	153/18670	1.40083e-05	0.000401265	0.000332238	7448/335/336/718/197/720/1191	7	VTN/APOA1/APOA2/C3/AHSG/C4A/CLU
BP	GO:0031589	cell-substrate adhesion	10/96	354/18670	1.4054e-05	0.000401265	0.000332238	2244/7448/22915/7414/335/2335/7450/347/2243/10894	10	FGB/VTN/MMRN1/VCL/APOA1/FN1/VWF/APOD/FGA/LYVE1
BP	GO:0034367	protein-containing complex remodeling	4/96	29/18670	1.41259e-05	0.000401265	0.000332238	341/335/336/5360	4	APOC1/APOA1/APOA2/PLTP
BP	GO:0032102	negative regulation of response to external stimulus	10/96	365/18670	1.82922e-05	0.00051162	0.00042361	2244/7448/5627/335/5624/347/2243/2811/5345/727	10	FGB/VTN/PROS1/APOA1/PROC/APOD/FGA/GP1BA/SERPINF2/C5
BP	GO:0030198	extracellular matrix organization	10/96	368/18670	1.96233e-05	0.000540533	0.00044755	2244/7448/1293/1311/1471/2335/7450/2243/5345/3936	10	FGB/VTN/COL6A3/COMP/CST3/FN1/VWF/FGA/SERPINF2/LCP1
BP	GO:0098883	synapse pruning	3/96	11/18670	2.10983e-05	0.000572487	0.000474006	713/714/718	3	C1QB/C1QC/C3
BP	GO:0033700	phospholipid efflux	3/96	12/18670	2.80261e-05	0.000749285	0.000620391	341/335/336	3	APOC1/APOA1/APOA2
BP	GO:0050766	positive regulation of phagocytosis	5/96	70/18670	3.00707e-05	0.000792297	0.000656004	335/336/718/197/720	5	APOA1/APOA2/C3/AHSG/C4A
BP	GO:0010872	regulation of cholesterol esterification	3/96	13/18670	3.6298e-05	0.000942711	0.000780544	341/335/336	3	APOC1/APOA1/APOA2
BP	GO:0031100	animal organ regeneration	5/96	73/18670	3.68681e-05	0.000944032	0.000781637	7448/335/336/2155/3936	5	VTN/APOA1/APOA2/F7/LCP1
BP	GO:0010811	positive regulation of cell-substrate adhesion	6/96	121/18670	3.76941e-05	0.000951776	0.000788049	2244/7448/22915/335/2335/2243	6	FGB/VTN/MMRN1/APOA1/FN1/FGA
BP	GO:0019730	antimicrobial humoral response	6/96	122/18670	3.94808e-05	0.000983233	0.000814095	2244/5473/2243/78989/1191/2597	6	FGB/PPBP/FGA/COLEC11/CLU/GAPDH
BP	GO:0031099	regeneration	7/96	198/18670	7.28976e-05	0.00179092	0.00148284	7448/335/336/347/2155/3936/2934	7	VTN/APOA1/APOA2/APOD/F7/LCP1/GSN
BP	GO:0071827	plasma lipoprotein particle organization	4/96	45/18670	8.32079e-05	0.0019817	0.0016408	341/335/336/5360	4	APOC1/APOA1/APOA2/PLTP
BP	GO:0034433	steroid esterification	3/96	17/18670	8.50233e-05	0.0019817	0.0016408	341/335/336	3	APOC1/APOA1/APOA2
BP	GO:0034434	sterol esterification	3/96	17/18670	8.50233e-05	0.0019817	0.0016408	341/335/336	3	APOC1/APOA1/APOA2
BP	GO:0034435	cholesterol esterification	3/96	17/18670	8.50233e-05	0.0019817	0.0016408	341/335/336	3	APOC1/APOA1/APOA2
BP	GO:0007597	blood coagulation, intrinsic pathway	3/96	18/18670	0.000101648	0.00230995	0.00191259	2158/7450/2811	3	F9/VWF/GP1BA
BP	GO:0060192	negative regulation of lipase activity	3/96	18/18670	0.000101648	0.00230995	0.00191259	341/335/336	3	APOC1/APOA1/APOA2
BP	GO:0006888	ER to Golgi vesicle-mediated transport	7/96	212/18670	0.000111743	0.002508	0.00207657	1778/2158/5627/8858/5265/5624/2155	7	DYNC1H1/F9/PROS1/PROZ/SERPINA1/PROC/F7
BP	GO:0071825	protein-lipid complex subunit organization	4/96	49/18670	0.000116479	0.00258242	0.00213819	341/335/336/5360	4	APOC1/APOA1/APOA2/PLTP
BP	GO:0010810	regulation of cell-substrate adhesion	7/96	215/18670	0.000121936	0.00267083	0.00221139	2244/7448/22915/335/2335/347/2243	7	FGB/VTN/MMRN1/APOA1/FN1/APOD/FGA
BP	GO:0030168	platelet activation	6/96	153/18670	0.000138696	0.00300179	0.00248541	2244/7414/1311/7450/2243/2811	6	FGB/VCL/COMP/VWF/FGA/GP1BA
BP	GO:0043691	reverse cholesterol transport	3/96	20/18670	0.000140952	0.00301472	0.00249612	335/336/1191	3	APOA1/APOA2/CLU
BP	GO:0007160	cell-matrix adhesion	7/96	225/18670	0.000161511	0.00341427	0.00282694	2244/7448/7414/2335/347/2243/10894	7	FGB/VTN/VCL/FN1/APOD/FGA/LYVE1
BP	GO:0030301	cholesterol transport	5/96	100/18670	0.000165672	0.00346198	0.00286644	341/335/336/1191/5360	5	APOC1/APOA1/APOA2/CLU/PLTP
BP	GO:0048259	regulation of receptor-mediated endocytosis	5/96	103/18670	0.000190315	0.00393174	0.00325539	341/6457/7448/718/1191	5	APOC1/SH3GL3/VTN/C3/CLU
BP	GO:0033344	cholesterol efflux	4/96	57/18670	0.000210441	0.00429867	0.0035592	341/335/336/5360	4	APOC1/APOA1/APOA2/PLTP
BP	GO:0034113	heterotypic cell-cell adhesion	4/96	61/18670	0.000273688	0.0055285	0.00457747	2244/335/2243/1832	4	FGB/APOA1/FGA/DSP
BP	GO:0015918	sterol transport	5/96	112/18670	0.000281239	0.00561861	0.00465208	341/335/336/1191/5360	5	APOC1/APOA1/APOA2/CLU/PLTP
BP	GO:0030282	bone mineralization	5/96	114/18670	0.000305283	0.0059947	0.00496347	7123/1311/1893/197/4256	5	CLEC3B/COMP/ECM1/AHSG/MGP
BP	GO:0032371	regulation of sterol transport	4/96	63/18670	0.000309957	0.0059947	0.00496347	341/335/336/5360	4	APOC1/APOA1/APOA2/PLTP
BP	GO:0032374	regulation of cholesterol transport	4/96	63/18670	0.000309957	0.0059947	0.00496347	341/335/336/5360	4	APOC1/APOA1/APOA2/PLTP
BP	GO:0034114	regulation of heterotypic cell-cell adhesion	3/96	26/18670	0.000314359	0.00601584	0.00498098	2244/335/2243	3	FGB/APOA1/FGA
BP	GO:0070252	actin-mediated cell contraction	5/96	116/18670	0.000330854	0.00626555	0.00518773	4625/6262/7273/1832/7171	5	MYH7/RYR2/TTN/DSP/TPM4
BP	GO:0034377	plasma lipoprotein particle assembly	3/96	28/18670	0.000393152	0.00736856	0.00610101	341/335/336	3	APOC1/APOA1/APOA2
BP	GO:0010954	positive regulation of protein processing	3/96	29/18670	0.000436886	0.00806879	0.00668077	7123/718/2934	3	CLEC3B/C3/GSN
BP	GO:0055008	cardiac muscle tissue morphogenesis	4/96	69/18670	0.000439389	0.00806879	0.00668077	4625/6262/7273/1832	4	MYH7/RYR2/TTN/DSP
BP	GO:0045940	positive regulation of steroid metabolic process	3/96	30/18670	0.000483625	0.0087923	0.00727983	341/335/336	3	APOC1/APOA1/APOA2
BP	GO:1903319	positive regulation of protein maturation	3/96	31/18670	0.000533453	0.00960215	0.00795036	7123/718/2934	3	CLEC3B/C3/GSN
BP	GO:0065005	protein-lipid complex assembly	3/96	32/18670	0.000586451	0.0104526	0.00865454	341/335/336	3	APOC1/APOA1/APOA2
BP	GO:0015914	phospholipid transport	4/96	75/18670	0.000603412	0.0106505	0.00881839	341/335/336/5360	4	APOC1/APOA1/APOA2/PLTP
BP	GO:0006909	phagocytosis	8/96	369/18670	0.000630613	0.010985	0.00909532	725/335/336/718/197/720/2934/8547	8	C4BPB/APOA1/APOA2/C3/AHSG/C4A/GSN/FCN3
BP	GO:0030500	regulation of bone mineralization	4/96	76/18670	0.000634446	0.010985	0.00909532	1311/1893/197/4256	4	COMP/ECM1/AHSG/MGP
BP	GO:0050708	regulation of protein secretion	9/96	472/18670	0.000724311	0.0124226	0.0102857	2244/335/336/2335/7273/2243/2597/727/5005	9	FGB/APOA1/APOA2/FN1/TTN/FGA/GAPDH/C5/ORM2
BP	GO:0030048	actin filament-based movement	5/96	138/18670	0.000731693	0.0124319	0.0102934	4625/6262/7273/1832/7171	5	MYH7/RYR2/TTN/DSP/TPM4
BP	GO:0050707	regulation of cytokine secretion	6/96	210/18670	0.000753976	0.0126919	0.0105086	335/336/2335/2597/727/5005	6	APOA1/APOA2/FN1/GAPDH/C5/ORM2
BP	GO:0060415	muscle tissue morphogenesis	4/96	82/18670	0.000844859	0.0140913	0.0116673	4625/6262/7273/1832	4	MYH7/RYR2/TTN/DSP
BP	GO:0030212	hyaluronan metabolic process	3/96	37/18670	0.000901769	0.0147695	0.0122288	3698/3699/10894	3	ITIH2/ITIH3/LYVE1
BP	GO:1900026	positive regulation of substrate adhesion-dependent cell spreading	3/96	37/18670	0.000901769	0.0147695	0.0122288	2244/335/2243	3	FGB/APOA1/FGA
BP	GO:0030049	muscle filament sliding	3/96	39/18670	0.0010528	0.0169379	0.0140242	4625/7273/7171	3	MYH7/TTN/TPM4
BP	GO:0033275	actin-myosin filament sliding	3/96	39/18670	0.0010528	0.0169379	0.0140242	4625/7273/7171	3	MYH7/TTN/TPM4
BP	GO:0010876	lipid localization	8/96	400/18670	0.00106259	0.016942	0.0140276	341/5104/335/336/347/718/1191/5360	8	APOC1/SERPINA5/APOA1/APOA2/APOD/C3/CLU/PLTP
BP	GO:0002791	regulation of peptide secretion	9/96	500/18670	0.00108643	0.016942	0.0140276	2244/335/336/2335/7273/2243/2597/727/5005	9	FGB/APOA1/APOA2/FN1/TTN/FGA/GAPDH/C5/ORM2
BP	GO:0048644	muscle organ morphogenesis	4/96	88/18670	0.00110027	0.016942	0.0140276	4625/6262/7273/1832	4	MYH7/RYR2/TTN/DSP
BP	GO:0045785	positive regulation of cell adhesion	8/96	403/18670	0.00111459	0.016942	0.0140276	2244/7448/22915/335/2335/2243/5345/3481	8	FGB/VTN/MMRN1/APOA1/FN1/FGA/SERPINF2/IGF2
BP	GO:0034378	chylomicron assembly	2/96	10/18670	0.00114624	0.016942	0.0140276	335/336	2	APOA1/APOA2
BP	GO:0035376	sterol import	2/96	10/18670	0.00114624	0.016942	0.0140276	335/336	2	APOA1/APOA2
BP	GO:0051593	response to folic acid	2/96	10/18670	0.00114624	0.016942	0.0140276	590/2934	2	BCHE/GSN
BP	GO:0070508	cholesterol import	2/96	10/18670	0.00114624	0.016942	0.0140276	335/336	2	APOA1/APOA2
BP	GO:0097278	complement-dependent cytotoxicity	2/96	10/18670	0.00114624	0.016942	0.0140276	922/718	2	CD5L/C3
BP	GO:2000425	regulation of apoptotic cell clearance	2/96	10/18670	0.00114624	0.016942	0.0140276	718/720	2	C3/C4A
BP	GO:1905952	regulation of lipid localization	5/96	157/18670	0.00130349	0.0191108	0.0158233	341/335/336/718/5360	5	APOC1/APOA1/APOA2/C3/PLTP
BP	GO:0002923	regulation of humoral immune response mediated by circulating immunoglobulin	2/96	11/18670	0.00139627	0.02012	0.0166589	725/3263	2	C4BPB/HPX
BP	GO:0045919	positive regulation of cytolysis	2/96	11/18670	0.00139627	0.02012	0.0166589	81494/3080	2	CFHR5/CFHR2
BP	GO:0070167	regulation of biomineral tissue development	4/96	94/18670	0.00140552	0.02012	0.0166589	1311/1893/197/4256	4	COMP/ECM1/AHSG/MGP
BP	GO:0003416	endochondral bone growth	3/96	44/18670	0.00149762	0.0211289	0.0174942	1293/1311/1893	3	COL6A3/COMP/ECM1
BP	GO:0050663	cytokine secretion	6/96	240/18670	0.00149924	0.0211289	0.0174942	335/336/2335/2597/727/5005	6	APOA1/APOA2/FN1/GAPDH/C5/ORM2
BP	GO:0031214	biomineral tissue development	5/96	163/18670	0.00153853	0.0215158	0.0178146	7123/1311/1893/197/4256	5	CLEC3B/COMP/ECM1/AHSG/MGP
BP	GO:0034372	very-low-density lipoprotein particle remodeling	2/96	12/18670	0.00166992	0.0231749	0.0191883	335/336	2	APOA1/APOA2
BP	GO:0043277	apoptotic cell clearance	3/96	46/18670	0.00170385	0.0234667	0.0194299	718/720/8547	3	C3/C4A/FCN3
BP	GO:0034446	substrate adhesion-dependent cell spreading	4/96	100/18670	0.00176546	0.0241324	0.0199811	2244/335/2335/2243	4	FGB/APOA1/FN1/FGA
BP	GO:0098868	bone growth	3/96	47/18670	0.00181329	0.0246011	0.0203692	1293/1311/1893	3	COL6A3/COMP/ECM1
BP	GO:0097006	regulation of plasma lipoprotein particle levels	4/96	101/18670	0.00183111	0.0246589	0.020417	341/335/336/5360	4	APOC1/APOA1/APOA2/PLTP
BP	GO:0002063	chondrocyte development	3/96	48/18670	0.00192701	0.0255716	0.0211727	1293/1311/1893	3	COL6A3/COMP/ECM1
BP	GO:0055010	ventricular cardiac muscle tissue morphogenesis	3/96	48/18670	0.00192701	0.0255716	0.0211727	4625/6262/1832	3	MYH7/RYR2/DSP
BP	GO:0001867	complement activation, lectin pathway	2/96	13/18670	0.00196694	0.0257259	0.0213004	78989/8547	2	COLEC11/FCN3
BP	GO:0018206	peptidyl-methionine modification	2/96	13/18670	0.00196694	0.0257259	0.0213004	335/336	2	APOA1/APOA2
BP	GO:0006641	triglyceride metabolic process	4/96	105/18670	0.00211065	0.0272139	0.0225325	341/335/336/718	4	APOC1/APOA1/APOA2/C3
BP	GO:0015748	organophosphate ester transport	4/96	105/18670	0.00211065	0.0272139	0.0225325	341/335/336/5360	4	APOC1/APOA1/APOA2/PLTP
BP	GO:0050821	protein stabilization	5/96	178/18670	0.00226146	0.0281855	0.023337	335/336/5216/1191/2597	5	APOA1/APOA2/PFN1/CLU/GAPDH
BP	GO:0010755	regulation of plasminogen activation	2/96	14/18670	0.00228709	0.0281855	0.023337	7123/5345	2	CLEC3B/SERPINF2
BP	GO:0034370	triglyceride-rich lipoprotein particle remodeling	2/96	14/18670	0.00228709	0.0281855	0.023337	335/336	2	APOA1/APOA2
BP	GO:0051775	response to redox state	2/96	14/18670	0.00228709	0.0281855	0.023337	6262/114990	2	RYR2/VASN
BP	GO:0002712	regulation of B cell mediated immunity	3/96	51/18670	0.00229453	0.0281855	0.023337	725/3263/718	3	C4BPB/HPX/C3
BP	GO:0002889	regulation of immunoglobulin mediated immune response	3/96	51/18670	0.00229453	0.0281855	0.023337	725/3263/718	3	C4BPB/HPX/C3
BP	GO:0048260	positive regulation of receptor-mediated endocytosis	3/96	51/18670	0.00229453	0.0281855	0.023337	7448/718/1191	3	VTN/C3/CLU
BP	GO:1900024	regulation of substrate adhesion-dependent cell spreading	3/96	52/18670	0.00242601	0.0296006	0.0245086	2244/335/2243	3	FGB/APOA1/FGA
BP	GO:0006936	muscle contraction	7/96	360/18670	0.00256643	0.0306512	0.0253785	4625/7414/6262/1311/7273/1832/7171	7	MYH7/VCL/RYR2/COMP/TTN/DSP/TPM4
BP	GO:1904019	epithelial cell apoptotic process	4/96	111/18670	0.00258324	0.0306512	0.0253785	2244/6262/2243/2934	4	FGB/RYR2/FGA/GSN
BP	GO:0050714	positive regulation of protein secretion	6/96	268/18670	0.00260952	0.0306512	0.0253785	2244/7273/2243/2597/727/5005	6	FGB/TTN/FGA/GAPDH/C5/ORM2
BP	GO:0018158	protein oxidation	2/96	15/18670	0.00263013	0.0306512	0.0253785	335/336	2	APOA1/APOA2
BP	GO:0030299	intestinal cholesterol absorption	2/96	15/18670	0.00263013	0.0306512	0.0253785	335/336	2	APOA1/APOA2
BP	GO:0034380	high-density lipoprotein particle assembly	2/96	15/18670	0.00263013	0.0306512	0.0253785	335/336	2	APOA1/APOA2
BP	GO:0071801	regulation of podosome assembly	2/96	15/18670	0.00263013	0.0306512	0.0253785	3936/2934	2	LCP1/GSN
BP	GO:0003012	muscle system process	8/96	465/18670	0.00272905	0.0316013	0.0261652	4625/7414/6262/1311/7273/1832/2934/7171	8	MYH7/VCL/RYR2/COMP/TTN/DSP/GSN/TPM4
BP	GO:0006869	lipid transport	7/96	365/18670	0.00277098	0.0318838	0.0263991	341/5104/335/336/347/1191/5360	7	APOC1/SERPINA5/APOA1/APOA2/APOD/CLU/PLTP
BP	GO:0003229	ventricular cardiac muscle tissue development	3/96	55/18670	0.0028481	0.0325651	0.0269632	4625/6262/1832	3	MYH7/RYR2/DSP
BP	GO:0048193	Golgi vesicle transport	7/96	368/18670	0.00289959	0.0329466	0.0272791	1778/2158/5627/8858/5265/5624/2155	7	DYNC1H1/F9/PROS1/PROZ/SERPINA1/PROC/F7
BP	GO:0002739	regulation of cytokine secretion involved in immune response	2/96	16/18670	0.00299583	0.0332099	0.027497	335/336	2	APOA1/APOA2
BP	GO:0010875	positive regulation of cholesterol efflux	2/96	16/18670	0.00299583	0.0332099	0.027497	335/5360	2	APOA1/PLTP
BP	GO:0034116	positive regulation of heterotypic cell-cell adhesion	2/96	16/18670	0.00299583	0.0332099	0.027497	2244/2243	2	FGB/FGA
BP	GO:1990000	amyloid fibril formation	2/96	16/18670	0.00299583	0.0332099	0.027497	1191/2934	2	CLU/GSN
BP	GO:0034384	high-density lipoprotein particle clearance	2/96	17/18670	0.00338394	0.0368383	0.0305013	335/336	2	APOA1/APOA2
BP	GO:0042268	regulation of cytolysis	2/96	17/18670	0.00338394	0.0368383	0.0305013	81494/3080	2	CFHR5/CFHR2
BP	GO:0098856	intestinal lipid absorption	2/96	17/18670	0.00338394	0.0368383	0.0305013	335/336	2	APOA1/APOA2
BP	GO:0031647	regulation of protein stability	6/96	284/18670	0.00347274	0.03758	0.0311154	335/336/5216/1191/2597/2934	6	APOA1/APOA2/PFN1/CLU/GAPDH/GSN
BP	GO:0002793	positive regulation of peptide secretion	6/96	288/18670	0.00371835	0.0399998	0.0331189	2244/7273/2243/2597/727/5005	6	FGB/TTN/FGA/GAPDH/C5/ORM2
BP	GO:0035994	response to muscle stretch	2/96	18/18670	0.00379422	0.0403907	0.0334426	6262/7273	2	RYR2/TTN
BP	GO:0032233	positive regulation of actin filament bundle assembly	3/96	61/18670	0.00382134	0.0403907	0.0334426	335/5216/5345	3	APOA1/PFN1/SERPINF2
BP	GO:0090303	positive regulation of wound healing	3/96	61/18670	0.00382134	0.0403907	0.0334426	7448/2155/5345	3	VTN/F7/SERPINF2
BP	GO:1902905	positive regulation of supramolecular fiber organization	5/96	204/18670	0.00405819	0.0426461	0.03531	335/5216/5345/1191/2934	5	APOA1/PFN1/SERPINF2/CLU/GSN
BP	GO:0050900	leukocyte migration	8/96	499/18670	0.00418278	0.0426872	0.035344	5627/2335/5473/347/2155/1893/6402/727	8	PROS1/FN1/PPBP/APOD/F7/ECM1/SELL/C5
BP	GO:0032368	regulation of lipid transport	4/96	127/18670	0.00418854	0.0426872	0.035344	341/335/336/5360	4	APOC1/APOA1/APOA2/PLTP
BP	GO:0002922	positive regulation of humoral immune response	2/96	19/18670	0.00422645	0.0426872	0.035344	3263/718	2	HPX/C3
BP	GO:0044241	lipid digestion	2/96	19/18670	0.00422645	0.0426872	0.035344	335/336	2	APOA1/APOA2
BP	GO:0046597	negative regulation of viral entry into host cell	2/96	19/18670	0.00422645	0.0426872	0.035344	2934/8547	2	GSN/FCN3
BP	GO:0071800	podosome assembly	2/96	19/18670	0.00422645	0.0426872	0.035344	3936/2934	2	LCP1/GSN
BP	GO:0098911	regulation of ventricular cardiac muscle cell action potential	2/96	19/18670	0.00422645	0.0426872	0.035344	6262/1832	2	RYR2/DSP
BP	GO:0046503	glycerolipid catabolic process	3/96	64/18670	0.00437502	0.0439435	0.0363843	341/335/336	3	APOC1/APOA1/APOA2
BP	GO:0006639	acylglycerol metabolic process	4/96	129/18670	0.00442746	0.044226	0.0366181	341/335/336/718	4	APOC1/APOA1/APOA2/C3
BP	GO:0001503	ossification	7/96	398/18670	0.00445293	0.0442373	0.0366275	7123/1311/1893/197/4256/3481/7171	7	CLEC3B/COMP/ECM1/AHSG/MGP/IGF2/TPM4
BP	GO:0006638	neutral lipid metabolic process	4/96	130/18670	0.0045503	0.044716	0.0370238	341/335/336/718	4	APOC1/APOA1/APOA2/C3
BP	GO:0042157	lipoprotein metabolic process	4/96	130/18670	0.0045503	0.044716	0.0370238	341/335/336/347	4	APOC1/APOA1/APOA2/APOD
BP	GO:0007015	actin filament organization	7/96	400/18670	0.00457524	0.0447193	0.0370266	335/5216/7273/5345/3936/2934/7171	7	APOA1/PFN1/TTN/SERPINF2/LCP1/GSN/TPM4
BP	GO:0002374	cytokine secretion involved in immune response	2/96	20/18670	0.0046804	0.0455025	0.037675	335/336	2	APOA1/APOA2
BP	GO:0040014	regulation of multicellular organism growth	3/96	66/18670	0.00476976	0.0461246	0.0381901	10939/8455/3481	3	AFG3L2/ATRN/IGF2
BP	GO:0048747	muscle fiber development	3/96	67/18670	0.00497493	0.0478541	0.0396221	10939/1311/7273	3	AFG3L2/COMP/TTN
BP	GO:0030502	negative regulation of bone mineralization	2/96	21/18670	0.00515582	0.0493331	0.0408467	1893/197	2	ECM1/AHSG
CC	GO:0072562	blood microparticle	28/96	147/19717	1.54388e-37	2.85618e-35	2.12893e-35	2244/7448/5627/3698/1356/1/335/336/922/590/5216/713/714/2335/3263/718/2243/197/720/3039/735/5345/1191/3250/629/2934/5005/8547	28	FGB/VTN/PROS1/ITIH2/CP/A1BG/APOA1/APOA2/CD5L/BCHE/PFN1/C1QB/C1QC/FN1/HPX/C3/FGA/AHSG/C4A/HBA1/C9/SERPINF2/CLU/HPR/CFB/GSN/ORM2/FCN3
CC	GO:0060205	cytoplasmic vesicle lumen	29/96	338/19717	2.00788e-28	1.3495e-26	1.00589e-26	1675/1778/10447/2244/7123/5627/22915/1/7414/5265/335/5199/80184/2335/5473/3263/7450/1893/718/2243/116844/197/3039/3699/5345/1191/3481/2934/5005	29	CFD/DYNC1H1/FAM3C/FGB/CLEC3B/PROS1/MMRN1/A1BG/VCL/SERPINA1/APOA1/CFP/CEP290/FN1/PPBP/HPX/VWF/ECM1/C3/FGA/LRG1/AHSG/HBA1/ITIH3/SERPINF2/CLU/IGF2/GSN/ORM2
CC	GO:0031983	vesicle lumen	29/96	339/19717	2.18838e-28	1.3495e-26	1.00589e-26	1675/1778/10447/2244/7123/5627/22915/1/7414/5265/335/5199/80184/2335/5473/3263/7450/1893/718/2243/116844/197/3039/3699/5345/1191/3481/2934/5005	29	CFD/DYNC1H1/FAM3C/FGB/CLEC3B/PROS1/MMRN1/A1BG/VCL/SERPINA1/APOA1/CFP/CEP290/FN1/PPBP/HPX/VWF/ECM1/C3/FGA/LRG1/AHSG/HBA1/ITIH3/SERPINF2/CLU/IGF2/GSN/ORM2
CC	GO:0034774	secretory granule lumen	27/96	321/19717	3.35111e-26	1.48907e-24	1.10992e-24	1675/1778/10447/2244/7123/5627/22915/1/7414/5265/335/5199/80184/2335/5473/7450/1893/718/2243/116844/197/3699/5345/1191/3481/2934/5005	27	CFD/DYNC1H1/FAM3C/FGB/CLEC3B/PROS1/MMRN1/A1BG/VCL/SERPINA1/APOA1/CFP/CEP290/FN1/PPBP/VWF/ECM1/C3/FGA/LRG1/AHSG/ITIH3/SERPINF2/CLU/IGF2/GSN/ORM2
CC	GO:0062023	collagen-containing extracellular matrix	29/96	406/19717	4.02451e-26	1.48907e-24	1.10992e-24	5104/2158/2244/7448/7123/1293/3698/22915/10216/1/5265/335/5118/5199/1311/713/714/2335/3263/7450/2155/563/1893/2243/197/4256/5345/1191/5005	29	SERPINA5/F9/FGB/VTN/CLEC3B/COL6A3/ITIH2/MMRN1/PRG4/A1BG/SERPINA1/APOA1/PCOLCE/CFP/COMP/C1QB/C1QC/FN1/HPX/VWF/F7/AZGP1/ECM1/FGA/AHSG/MGP/SERPINF2/CLU/ORM2
CC	GO:0031093	platelet alpha granule lumen	15/96	67/19717	1.83813e-21	5.66757e-20	4.22447e-20	1675/2244/5627/22915/1/5265/2335/5473/7450/2243/197/5345/1191/3481/5005	15	CFD/FGB/PROS1/MMRN1/A1BG/SERPINA1/FN1/PPBP/VWF/FGA/AHSG/SERPINF2/CLU/IGF2/ORM2
CC	GO:0031091	platelet alpha granule	16/96	91/19717	5.2203e-21	1.37965e-19	1.02836e-19	1675/5104/2244/5627/22915/1/5265/2335/5473/7450/2243/197/5345/1191/3481/5005	16	CFD/SERPINA5/FGB/PROS1/MMRN1/A1BG/SERPINA1/FN1/PPBP/VWF/FGA/AHSG/SERPINF2/CLU/IGF2/ORM2
CC	GO:0005788	endoplasmic reticulum lumen	22/96	309/19717	8.7057e-20	2.01319e-18	1.50059e-18	2158/7448/1293/3698/8858/1356/5265/335/336/590/5199/1471/2335/5624/2155/51156/718/2243/197/720/3053/1191	22	F9/VTN/COL6A3/ITIH2/PROZ/CP/SERPINA1/APOA1/APOA2/BCHE/CFP/CST3/FN1/PROC/F7/SERPINA10/C3/FGA/AHSG/C4A/SERPIND1/CLU
CC	GO:0034358	plasma lipoprotein particle	7/96	37/19717	4.74608e-10	8.78024e-09	6.54459e-09	341/335/336/51449/1191/3250/5360	7	APOC1/APOA1/APOA2/PCYOX1/CLU/HPR/PLTP
CC	GO:1990777	lipoprotein particle	7/96	37/19717	4.74608e-10	8.78024e-09	6.54459e-09	341/335/336/51449/1191/3250/5360	7	APOC1/APOA1/APOA2/PCYOX1/CLU/HPR/PLTP
CC	GO:0032994	protein-lipid complex	7/96	39/19717	7.03452e-10	1.18308e-08	8.8184e-09	341/335/336/51449/1191/3250/5360	7	APOC1/APOA1/APOA2/PCYOX1/CLU/HPR/PLTP
CC	GO:0034364	high-density lipoprotein particle	6/96	26/19717	2.4201e-09	3.73099e-08	2.781e-08	341/335/336/1191/3250/5360	6	APOC1/APOA1/APOA2/CLU/HPR/PLTP
CC	GO:0031089	platelet dense granule lumen	4/96	14/19717	5.08829e-07	7.24103e-06	5.3973e-06	10447/7123/1893/3699	4	FAM3C/CLEC3B/ECM1/ITIH3
CC	GO:0034361	very-low-density lipoprotein particle	4/96	20/19717	2.40823e-06	2.84467e-05	2.12035e-05	341/335/336/51449	4	APOC1/APOA1/APOA2/PCYOX1
CC	GO:0034385	triglyceride-rich plasma lipoprotein particle	4/96	20/19717	2.40823e-06	2.84467e-05	2.12035e-05	341/335/336/51449	4	APOC1/APOA1/APOA2/PCYOX1
CC	GO:1904813	ficolin-1-rich granule lumen	7/96	124/19717	2.46026e-06	2.84467e-05	2.12035e-05	1675/1/7414/5265/1471/116844/2934	7	CFD/A1BG/VCL/SERPINA1/CST3/LRG1/GSN
CC	GO:0042827	platelet dense granule	4/96	21/19717	2.96379e-06	3.2253e-05	2.40406e-05	10447/7123/1893/3699	4	FAM3C/CLEC3B/ECM1/ITIH3
CC	GO:0101002	ficolin-1-rich granule	8/96	185/19717	3.38577e-06	3.47982e-05	2.59377e-05	1675/1/7414/5265/1471/116844/1832/2934	8	CFD/A1BG/VCL/SERPINA1/CST3/LRG1/DSP/GSN
CC	GO:0005796	Golgi lumen	6/96	102/19717	1.05138e-05	0.000102372	7.63055e-05	2158/7448/5627/8858/5624/2155	6	F9/VTN/PROS1/PROZ/PROC/F7
CC	GO:0035580	specific granule lumen	5/96	62/19717	1.27982e-05	0.000115606	8.61701e-05	7414/5199/80184/116844/5005	5	VCL/CFP/CEP290/LRG1/ORM2
CC	GO:0002102	podosome	4/96	30/19717	1.31228e-05	0.000115606	8.61701e-05	7414/3936/2934/7171	4	VCL/LCP1/GSN/TPM4
CC	GO:0042627	chylomicron	3/96	13/19717	3.08783e-05	0.000259658	0.000193543	341/335/336	3	APOC1/APOA1/APOA2
CC	GO:0005581	collagen trimer	5/96	87/19717	6.63964e-05	0.000534058	0.000398075	1293/713/714/78989/8547	5	COL6A3/C1QB/C1QC/COLEC11/FCN3
CC	GO:0071682	endocytic vesicle lumen	3/96	20/19717	0.000120073	0.000925561	0.000689892	335/3263/3039	3	APOA1/HPX/HBA1
CC	GO:1904724	tertiary granule lumen	4/96	55/19717	0.000148796	0.00110109	0.000820726	5199/1471/5473/116844	4	CFP/CST3/PPBP/LRG1
CC	GO:0046930	pore complex	3/96	23/19717	0.000184568	0.00131327	0.000978884	735/727/730	3	C9/C5/C7
CC	GO:0005916	fascia adherens	2/96	10/19717	0.0010292	0.00705194	0.00525635	7414/1832	2	VCL/DSP
CC	GO:0042581	specific granule	5/96	160/19717	0.00111535	0.00736928	0.00549289	7414/5199/80184/116844/5005	5	VCL/CFP/CEP290/LRG1/ORM2
CC	GO:0070820	tertiary granule	5/96	164/19717	0.00124477	0.00794076	0.00591886	5199/1471/5473/116844/1832	5	CFP/CST3/PPBP/LRG1/DSP
CC	GO:0001725	stress fiber	3/96	67/19717	0.00427717	0.0255251	0.0190258	4625/3936/7171	3	MYH7/LCP1/TPM4
CC	GO:0097517	contractile actin filament bundle	3/96	67/19717	0.00427717	0.0255251	0.0190258	4625/3936/7171	3	MYH7/LCP1/TPM4
CC	GO:0044449	contractile fiber part	5/96	221/19717	0.00452625	0.0261674	0.0195046	4625/7414/6262/7273/7171	5	MYH7/VCL/RYR2/TTN/TPM4
CC	GO:0030016	myofibril	5/96	224/19717	0.00479015	0.0268538	0.0200162	4625/7414/6262/7273/7171	5	MYH7/VCL/RYR2/TTN/TPM4
CC	GO:0043292	contractile fiber	5/96	234/19717	0.00574891	0.0309884	0.0230981	4625/7414/6262/7273/7171	5	MYH7/VCL/RYR2/TTN/TPM4
CC	GO:0032432	actin filament bundle	3/96	75/19717	0.00586268	0.0309884	0.0230981	4625/3936/7171	3	MYH7/LCP1/TPM4
CC	GO:0042641	actomyosin	3/96	79/19717	0.00677061	0.0339535	0.0253081	4625/3936/7171	3	MYH7/LCP1/TPM4
CC	GO:0005766	primary lysosome	4/96	155/19717	0.00697423	0.0339535	0.0253081	1778/718/5284/5005	4	DYNC1H1/C3/PIGR/ORM2
CC	GO:0042582	azurophil granule	4/96	155/19717	0.00697423	0.0339535	0.0253081	1778/718/5284/5005	4	DYNC1H1/C3/PIGR/ORM2
CC	GO:0005865	striated muscle thin filament	2/96	31/19717	0.00995166	0.0450107	0.0335499	7273/7171	2	TTN/TPM4
CC	GO:0005775	vacuolar lumen	4/96	172/19717	0.00997492	0.0450107	0.0335499	1778/23324/718/5005	4	DYNC1H1/MAN2B2/C3/ORM2
CC	GO:0035578	azurophil granule lumen	3/96	91/19717	0.00997534	0.0450107	0.0335499	1778/718/5005	3	DYNC1H1/C3/ORM2
CC	GO:0036379	myofilament	2/96	32/19717	0.0105817	0.0466099	0.034742	7273/7171	2	TTN/TPM4
MF	GO:0061134	peptidase regulator activity	18/93	219/17697	7.36181e-17	1.84045e-14	1.41037e-14	5104/6906/5627/1293/3698/5265/5118/1471/2335/51156/718/197/720/3699/3053/5345/2597/727	18	SERPINA5/SERPINA7/PROS1/COL6A3/ITIH2/SERPINA1/PCOLCE/CST3/FN1/SERPINA10/C3/AHSG/C4A/ITIH3/SERPIND1/SERPINF2/GAPDH/C5
MF	GO:0004866	endopeptidase inhibitor activity	16/93	175/17697	8.21071e-16	9.60269e-14	7.35869e-14	5104/6906/5627/1293/3698/5265/1471/51156/718/197/720/3699/3053/5345/2597/727	16	SERPINA5/SERPINA7/PROS1/COL6A3/ITIH2/SERPINA1/CST3/SERPINA10/C3/AHSG/C4A/ITIH3/SERPIND1/SERPINF2/GAPDH/C5
MF	GO:0030414	peptidase inhibitor activity	16/93	182/17697	1.53643e-15	9.60269e-14	7.35869e-14	5104/6906/5627/1293/3698/5265/1471/51156/718/197/720/3699/3053/5345/2597/727	16	SERPINA5/SERPINA7/PROS1/COL6A3/ITIH2/SERPINA1/CST3/SERPINA10/C3/AHSG/C4A/ITIH3/SERPIND1/SERPINF2/GAPDH/C5
MF	GO:0061135	endopeptidase regulator activity	16/93	182/17697	1.53643e-15	9.60269e-14	7.35869e-14	5104/6906/5627/1293/3698/5265/1471/51156/718/197/720/3699/3053/5345/2597/727	16	SERPINA5/SERPINA7/PROS1/COL6A3/ITIH2/SERPINA1/CST3/SERPINA10/C3/AHSG/C4A/ITIH3/SERPIND1/SERPINF2/GAPDH/C5
MF	GO:0004857	enzyme inhibitor activity	19/93	375/17697	6.87186e-14	3.43593e-12	2.63301e-12	341/5104/6906/5627/1293/3698/5265/335/336/1471/51156/718/197/720/3699/3053/5345/2597/727	19	APOC1/SERPINA5/SERPINA7/PROS1/COL6A3/ITIH2/SERPINA1/APOA1/APOA2/CST3/SERPINA10/C3/AHSG/C4A/ITIH3/SERPIND1/SERPINF2/GAPDH/C5
MF	GO:0005201	extracellular matrix structural constituent	12/93	163/17697	5.42303e-11	2.2596e-09	1.73156e-09	2244/7448/1293/22915/10216/5118/1311/2335/7450/1893/2243/4256	12	FGB/VTN/COL6A3/MMRN1/PRG4/PCOLCE/COMP/FN1/VWF/ECM1/FGA/MGP
MF	GO:0002020	protease binding	10/93	128/17697	1.33567e-09	4.74403e-08	3.63543e-08	5104/5265/1311/1471/2335/7450/1893/7273/6402/5345	10	SERPINA5/SERPINA1/COMP/CST3/FN1/VWF/ECM1/TTN/SELL/SERPINF2
MF	GO:0004867	serine-type endopeptidase inhibitor activity	9/93	94/17697	1.51809e-09	4.74403e-08	3.63543e-08	5104/6906/1293/3698/5265/51156/3699/3053/5345	9	SERPINA5/SERPINA7/COL6A3/ITIH2/SERPINA1/SERPINA10/ITIH3/SERPIND1/SERPINF2
MF	GO:0004252	serine-type endopeptidase activity	9/93	160/17697	1.61977e-07	4.49936e-06	3.44793e-06	1675/2158/8858/3083/51279/5624/2155/3250/629	9	CFD/F9/PROZ/HGFAC/C1RL/PROC/F7/HPR/CFB
MF	GO:0008201	heparin binding	9/93	169/17697	2.5822e-07	6.45549e-06	4.94694e-06	5104/7448/7123/5118/1311/2335/51156/6402/3053	9	SERPINA5/VTN/CLEC3B/PCOLCE/COMP/FN1/SERPINA10/SELL/SERPIND1
MF	GO:0005539	glycosaminoglycan binding	10/93	229/17697	3.42019e-07	7.77317e-06	5.9567e-06	5104/7448/7123/5118/1311/2335/51156/6402/10894/3053	10	SERPINA5/VTN/CLEC3B/PCOLCE/COMP/FN1/SERPINA10/SELL/LYVE1/SERPIND1
MF	GO:0008236	serine-type peptidase activity	9/93	182/17697	4.83369e-07	1.00702e-05	7.71694e-06	1675/2158/8858/3083/51279/5624/2155/3250/629	9	CFD/F9/PROZ/HGFAC/C1RL/PROC/F7/HPR/CFB
MF	GO:0017171	serine hydrolase activity	9/93	186/17697	5.80379e-07	1.11611e-05	8.55296e-06	1675/2158/8858/3083/51279/5624/2155/3250/629	9	CFD/F9/PROZ/HGFAC/C1RL/PROC/F7/HPR/CFB
MF	GO:1901681	sulfur compound binding	10/93	250/17697	7.64459e-07	1.36511e-05	1.0461e-05	5104/7448/7123/5118/6262/1311/2335/51156/6402/3053	10	SERPINA5/VTN/CLEC3B/PCOLCE/RYR2/COMP/FN1/SERPINA10/SELL/SERPIND1
MF	GO:0031210	phosphatidylcholine binding	4/93	27/17697	1.14329e-05	0.000170575	0.000130714	341/5104/336/5360	4	APOC1/SERPINA5/APOA2/PLTP
MF	GO:0050997	quaternary ammonium group binding	4/93	27/17697	1.14329e-05	0.000170575	0.000130714	341/5104/336/5360	4	APOC1/SERPINA5/APOA2/PLTP
MF	GO:0050839	cell adhesion molecule binding	12/93	499/17697	1.15991e-05	0.000170575	0.000130714	2244/7448/7414/5216/1311/2335/7450/114990/2243/3936/1832/3481	12	FGB/VTN/VCL/PFN1/COMP/FN1/VWF/VASN/FGA/LCP1/DSP/IGF2
MF	GO:0005518	collagen binding	5/93	67/17697	2.68517e-05	0.00037294	0.00028579	7448/5118/1311/2335/7450	5	VTN/PCOLCE/COMP/FN1/VWF
MF	GO:0070405	ammonium ion binding	5/93	75/17697	4.64264e-05	0.000610874	0.000468122	341/5104/336/590/5360	5	APOC1/SERPINA5/APOA2/BCHE/PLTP
MF	GO:0005178	integrin binding	6/93	132/17697	6.88531e-05	0.000860663	0.00065954	7448/1311/2335/7450/3936/3481	6	VTN/COMP/FN1/VWF/LCP1/IGF2
MF	GO:0004175	endopeptidase activity	10/93	427/17697	8.15571e-05	0.000970917	0.000744029	1675/2158/8858/3083/51279/10939/5624/2155/3250/629	10	CFD/F9/PROZ/HGFAC/C1RL/AFG3L2/PROC/F7/HPR/CFB
MF	GO:0030246	carbohydrate binding	8/93	271/17697	9.0244e-05	0.000984466	0.000754412	23324/7448/7123/10216/6402/78989/8455/8547	8	MAN2B2/VTN/CLEC3B/PRG4/SELL/COLEC11/ATRN/FCN3
MF	GO:0055102	lipase inhibitor activity	3/93	17/17697	9.05709e-05	0.000984466	0.000754412	341/335/336	3	APOC1/APOA1/APOA2
MF	GO:0051087	chaperone binding	5/93	102/17697	0.000200421	0.00208772	0.00159985	2244/1356/2335/7450/1191	5	FGB/CP/FN1/VWF/CLU
MF	GO:0120013	intermembrane lipid transfer activity	3/93	24/17697	0.00026249	0.0026249	0.0020115	335/336/5360	3	APOA1/APOA2/PLTP
MF	GO:0070325	lipoprotein particle receptor binding	3/93	26/17697	0.000334635	0.00321764	0.00246573	335/336/1191	3	APOA1/APOA2/CLU
MF	GO:0001540	amyloid-beta binding	4/93	78/17697	0.000757458	0.0070135	0.00537456	335/590/1471/1191	4	APOA1/BCHE/CST3/CLU
MF	GO:0015485	cholesterol binding	3/93	49/17697	0.00217311	0.0194028	0.0148687	335/336/347	3	APOA1/APOA2/APOD
MF	GO:0005044	scavenger receptor activity	3/93	51/17697	0.00243779	0.0210155	0.0161045	7448/10216/922	3	VTN/PRG4/CD5L
MF	GO:0008035	high-density lipoprotein particle binding	2/93	15/17697	0.00274373	0.0221268	0.0169561	335/336	2	APOA1/APOA2
MF	GO:0070492	oligosaccharide binding	2/93	15/17697	0.00274373	0.0221268	0.0169561	6402/78989	2	SELL/COLEC11
MF	GO:0032934	sterol binding	3/93	56/17697	0.00318416	0.0248763	0.0190631	335/336/347	3	APOA1/APOA2/APOD
MF	GO:0051015	actin filament binding	5/93	198/17697	0.00391041	0.028266	0.0216607	4625/7273/3936/2934/7171	5	MYH7/TTN/LCP1/GSN/TPM4
MF	GO:0017127	cholesterol transporter activity	2/93	18/17697	0.00395724	0.028266	0.0216607	335/336	2	APOA1/APOA2
MF	GO:0120020	intermembrane cholesterol transfer activity	2/93	18/17697	0.00395724	0.028266	0.0216607	335/336	2	APOA1/APOA2
MF	GO:0120015	intermembrane sterol transfer activity	2/93	19/17697	0.00440773	0.0306016	0.0234505	335/336	2	APOA1/APOA2
MF	GO:0043177	organic acid binding	5/93	205/17697	0.00452904	0.0306016	0.0234505	341/5104/6262/3039/10894	5	APOC1/SERPINA5/RYR2/HBA1/LYVE1
MF	GO:0005319	lipid transporter activity	4/93	131/17697	0.00503866	0.0331491	0.0254026	335/336/347/5360	4	APOA1/APOA2/APOD/PLTP
MF	GO:0001848	complement binding	2/93	21/17697	0.00537621	0.0344629	0.0264094	720/629	2	C4A/CFB
MF	GO:0046625	sphingolipid binding	2/93	23/17697	0.00643305	0.0402066	0.0308109	6402/5360	2	SELL/PLTP
MF	GO:0001871	pattern binding	2/93	25/17697	0.00757635	0.0442469	0.0339071	7448/10216	2	VTN/PRG4
MF	GO:0030247	polysaccharide binding	2/93	25/17697	0.00757635	0.0442469	0.0339071	7448/10216	2	VTN/PRG4
MF	GO:0003779	actin binding	7/93	431/17697	0.00761047	0.0442469	0.0339071	4625/7414/5216/7273/3936/2934/7171	7	MYH7/VCL/PFN1/TTN/LCP1/GSN/TPM4

## Sheet: KEGG
Supplemental Data S5. Pathway enrichment results for proteins connected with the chemical exposome.
ID	Description	GeneRatio	BgRatio	pvalue	p.adjust	qvalue	geneID	Count	kegg_class	geneName
hsa04610	Complement and coagulation cascades	24/60	115/10971	6.48167e-33	5.18534e-31	4.50306e-31	A0A024R6N9/P00740/P02675/D9ZGG2/A0A0S2Z4K3/P20851/E9KL23/Q9BXR6/A0A024RAB9/A0A024RAA7/P04070/P04275/P08709/B4DR57/P02671/P0C0L4/P02748/P05546/P08697/P10909/P36980/A0A1U9X7H8/P01031/P10643	24	Organismal Systems; Immune system	SERPINA5/F9/FGB/VTN/PROS1/C4BPB/SERPINA1/CFHR5/C1QB/C1QC/PROC/VWF/F7/C3/FGA/C4A/C9/SERPIND1/SERPINF2/CLU/CFHR2/CFB/C5/C7
hsa05020	Prion diseases	5/60	58/10971	1.51506e-05	0.000606025	0.000526285	A0A024RAB9/A0A024RAA7/P02748/P01031/P10643	5	Human Diseases; Neurodegenerative disease	C1QB/C1QC/C9/C5/C7
hsa05133	Pertussis	6/60	115/10971	3.67399e-05	0.000915625	0.000795148	P20851/A0A024RAB9/A0A024RAA7/B4DR57/P0C0L4/P01031	6	Human Diseases; Infectious disease: bacterial	C4BPB/C1QB/C1QC/C3/C4A/C5
hsa05322	Systemic lupus erythematosus	7/60	176/10971	4.57812e-05	0.000915625	0.000795148	A0A024RAB9/A0A024RAA7/B4DR57/P0C0L4/P02748/P01031/P10643	7	Human Diseases; Immune disease	C1QB/C1QC/C3/C4A/C9/C5/C7
hsa05150	Staphylococcus aureus infection	6/60	166/10971	0.000279246	0.00446793	0.00388004	A0A024RAB9/A0A024RAA7/B4DR57/P0C0L4/A0A1U9X7H8/P01031	6	Human Diseases; Infectious disease: bacterial	C1QB/C1QC/C3/C4A/CFB/C5
hsa04512	ECM-receptor interaction	5/60	130/10971	0.000700965	0.0093462	0.00811644	D9ZGG2/D9ZGF2/P49747/P04275/L7UYB8	5	Environmental Information Processing; Signaling molecules and interaction	VTN/COL6A3/COMP/VWF/GP1BA
hsa04979	Cholesterol metabolism	4/60	78/10971	0.000852585	0.00974383	0.00846175	A0A024R0T8/A0A024R3E3/P02652/P55058	4	Organismal Systems; Digestive system	APOC1/APOA1/APOA2/PLTP
hsa05143	African trypanosomiasis	3/60	52/10971	0.00284107	0.0284107	0.0246725	A0A024R3E3/D1MGQ2/P00739	3	Human Diseases; Infectious disease: parasitic	APOA1/HBA1/HPR

## Sheet: Reactome
Supplemental Data S5. Pathway enrichment results for proteins connected with the chemical exposome.
ID	Description	GeneRatio	BgRatio	pvalue	p.adjust	qvalue	geneID	Count	geneName
R-HSA-114608	Platelet degranulation	23/83	129/10654	1.06584e-25	2.24891e-23	1.6829e-23	1675/10447/2244/7123/5627/22915/1/7414/5265/335/5216/2335/5473/7450/1893/7273/2243/197/3699/5345/1191/3481/5005	23	CFD/FAM3C/FGB/CLEC3B/PROS1/MMRN1/A1BG/VCL/SERPINA1/APOA1/PFN1/FN1/PPBP/VWF/ECM1/TTN/FGA/AHSG/ITIH3/SERPINF2/CLU/IGF2/ORM2
R-HSA-76005	Response to elevated platelet cytosolic Ca2+	23/83	134/10654	2.7015e-25	2.85008e-23	2.13276e-23	1675/10447/2244/7123/5627/22915/1/7414/5265/335/5216/2335/5473/7450/1893/7273/2243/197/3699/5345/1191/3481/5005	23	CFD/FAM3C/FGB/CLEC3B/PROS1/MMRN1/A1BG/VCL/SERPINA1/APOA1/PFN1/FN1/PPBP/VWF/ECM1/TTN/FGA/AHSG/ITIH3/SERPINF2/CLU/IGF2/ORM2
R-HSA-166658	Complement cascade	18/83	58/10654	5.53297e-25	3.89152e-23	2.91209e-23	1675/7448/5627/725/81494/5199/713/714/718/720/78989/735/1191/3080/629/727/8547/730	18	CFD/VTN/PROS1/C4BPB/CFHR5/CFP/C1QB/C1QC/C3/C4A/COLEC11/C9/CLU/CFHR2/CFB/C5/FCN3/C7
R-HSA-977606	Regulation of Complement cascade	15/83	47/10654	3.85146e-21	2.03165e-19	1.52031e-19	7448/5627/725/81494/5199/713/714/718/720/735/1191/3080/629/727/730	15	VTN/PROS1/C4BPB/CFHR5/CFP/C1QB/C1QC/C3/C4A/C9/CLU/CFHR2/CFB/C5/C7
R-HSA-76002	Platelet activation, signaling and aggregation	24/83	262/10654	1.0522e-19	4.4403e-18	3.32275e-18	1675/10447/2244/7123/5627/22915/1/7414/5265/335/5216/2335/5473/7450/1893/7273/2243/197/3699/2811/5345/1191/3481/5005	24	CFD/FAM3C/FGB/CLEC3B/PROS1/MMRN1/A1BG/VCL/SERPINA1/APOA1/PFN1/FN1/PPBP/VWF/ECM1/TTN/FGA/AHSG/ITIH3/GP1BA/SERPINF2/CLU/IGF2/ORM2
R-HSA-381426	Regulation of Insulin-like Growth Factor (IGF) transport and uptake by Insulin-like Growth Factor Binding Proteins (IGFBPs)	15/83	125/10654	2.90047e-14	1.02e-12	7.63282e-13	3698/1356/5265/335/336/1471/2335/5624/51156/718/2243/197/720/3053/3481	15	ITIH2/CP/SERPINA1/APOA1/APOA2/CST3/FN1/PROC/SERPINA10/C3/FGA/AHSG/C4A/SERPIND1/IGF2
R-HSA-166663	Initial triggering of complement	9/83	23/10654	5.06484e-14	1.52669e-12	1.14245e-12	1675/5199/713/714/718/720/78989/629/8547	9	CFD/CFP/C1QB/C1QC/C3/C4A/COLEC11/CFB/FCN3
R-HSA-8957275	Post-translational protein phosphorylation	14/83	108/10654	7.55276e-14	1.99204e-12	1.49068e-12	3698/1356/5265/335/336/1471/2335/5624/51156/718/2243/197/720/3053	14	ITIH2/CP/SERPINA1/APOA1/APOA2/CST3/FN1/PROC/SERPINA10/C3/FGA/AHSG/C4A/SERPIND1
R-HSA-140877	Formation of Fibrin Clot (Clotting Cascade)	10/83	39/10654	2.49442e-13	5.84803e-12	4.37618e-12	5104/2158/2244/5627/5624/7450/2155/2243/3053/2811	10	SERPINA5/F9/FGB/PROS1/PROC/VWF/F7/FGA/SERPIND1/GP1BA
R-HSA-159740	Gamma-carboxylation of protein precursors	5/83	10/10654	6.20935e-09	1.19107e-07	8.91295e-08	2158/5627/8858/5624/2155	5	F9/PROS1/PROZ/PROC/F7
R-HSA-159782	Removal of aminoterminal propeptides from gamma-carboxylated proteins	5/83	10/10654	6.20935e-09	1.19107e-07	8.91295e-08	2158/5627/8858/5624/2155	5	F9/PROS1/PROZ/PROC/F7
R-HSA-159854	Gamma-carboxylation, transport, and amino-terminal cleavage of proteins	5/83	11/10654	1.13144e-08	1.89454e-07	1.41772e-07	2158/5627/8858/5624/2155	5	F9/PROS1/PROZ/PROC/F7
R-HSA-140837	Intrinsic Pathway of Fibrin Clot Formation	6/83	22/10654	1.25704e-08	1.89454e-07	1.41772e-07	5104/2158/5624/7450/3053/2811	6	SERPINA5/F9/PROC/VWF/SERPIND1/GP1BA
R-HSA-140875	Common Pathway of Fibrin Clot Formation	6/83	22/10654	1.25704e-08	1.89454e-07	1.41772e-07	5104/2244/5627/5624/2243/3053	6	SERPINA5/FGB/PROS1/PROC/FGA/SERPIND1
R-HSA-6798695	Neutrophil degranulation	17/83	480/10654	1.26671e-07	1.78184e-06	1.33338e-06	1675/1778/1/7414/5265/5199/80184/1471/5473/718/116844/197/6402/5284/1832/2934/5005	17	CFD/DYNC1H1/A1BG/VCL/SERPINA1/CFP/CEP290/CST3/PPBP/C3/LRG1/AHSG/SELL/PIGR/DSP/GSN/ORM2
R-HSA-2168880	Scavenging of heme from plasma	4/83	13/10654	2.32123e-06	3.06113e-05	2.29069e-05	335/3263/3039/3250	4	APOA1/HPX/HBA1/HPR
R-HSA-166786	Creation of C4 and C2 activators	4/83	14/10654	3.23047e-06	4.00959e-05	3.00044e-05	713/714/78989/8547	4	C1QB/C1QC/COLEC11/FCN3
R-HSA-216083	Integrin cell surface interactions	7/83	85/10654	4.07595e-06	4.61994e-05	3.45718e-05	2244/7448/1293/1311/2335/7450/2243	7	FGB/VTN/COL6A3/COMP/FN1/VWF/FGA
R-HSA-354194	GRB2:SOS provides linkage to MAPK signaling for Integrins	4/83	15/10654	4.37909e-06	4.61994e-05	3.45718e-05	2244/2335/7450/2243	4	FGB/FN1/VWF/FGA
R-HSA-372708	p130Cas linkage to MAPK signaling for integrins	4/83	15/10654	4.37909e-06	4.61994e-05	3.45718e-05	2244/2335/7450/2243	4	FGB/FN1/VWF/FGA
R-HSA-6802948	Signaling by high-kinase activity BRAF mutants	5/83	36/10654	7.92433e-06	7.96207e-05	5.95815e-05	2244/7414/2335/7450/2243	5	FGB/VCL/FN1/VWF/FGA
R-HSA-163841	Gamma carboxylation, hypusine formation and arylsulfatase activation	5/83	39/10654	1.18828e-05	0.000109012	8.15752e-05	2158/5627/8858/5624/2155	5	F9/PROS1/PROZ/PROC/F7
R-HSA-76009	Platelet Aggregation (Plug Formation)	5/83	39/10654	1.18828e-05	0.000109012	8.15752e-05	2244/2335/7450/2243/2811	5	FGB/FN1/VWF/FGA/GP1BA
R-HSA-5674135	MAP2K and MAPK activation	5/83	40/10654	1.34977e-05	0.000118667	8.88008e-05	2244/7414/2335/7450/2243	5	FGB/VCL/FN1/VWF/FGA
R-HSA-2173782	Binding and Uptake of Ligands by Scavenger Receptors	5/83	42/10654	1.72381e-05	0.00014549	0.000108872	335/3263/3039/78989/3250	5	APOA1/HPX/HBA1/COLEC11/HPR
R-HSA-6802946	Signaling by moderate kinase activity BRAF mutants	5/83	47/10654	3.01506e-05	0.000219371	0.000164159	2244/7414/2335/7450/2243	5	FGB/VCL/FN1/VWF/FGA
R-HSA-6802949	Signaling by RAS mutants	5/83	47/10654	3.01506e-05	0.000219371	0.000164159	2244/7414/2335/7450/2243	5	FGB/VCL/FN1/VWF/FGA
R-HSA-6802955	Paradoxical activation of RAF signaling by kinase inactive BRAF	5/83	47/10654	3.01506e-05	0.000219371	0.000164159	2244/7414/2335/7450/2243	5	FGB/VCL/FN1/VWF/FGA
R-HSA-9649948	Signaling downstream of RAS mutants	5/83	47/10654	3.01506e-05	0.000219371	0.000164159	2244/7414/2335/7450/2243	5	FGB/VCL/FN1/VWF/FGA
R-HSA-354192	Integrin alphaIIb beta3 signaling	4/83	27/10654	5.24323e-05	0.000356878	0.000267058	2244/2335/7450/2243	4	FGB/FN1/VWF/FGA
R-HSA-9006921	Integrin signaling	4/83	27/10654	5.24323e-05	0.000356878	0.000267058	2244/2335/7450/2243	4	FGB/FN1/VWF/FGA
R-HSA-6802952	Signaling by BRAF and RAF fusions	5/83	67/10654	0.000168058	0.00110813	0.000829235	2244/7414/2335/7450/2243	5	FGB/VCL/FN1/VWF/FGA
R-HSA-6802957	Oncogenic MAPK signaling	5/83	71/10654	0.000221121	0.00141384	0.001058	2244/7414/2335/7450/2243	5	FGB/VCL/FN1/VWF/FGA
R-HSA-8963898	Plasma lipoprotein assembly	3/83	18/10654	0.000341924	0.00212194	0.00158788	341/335/336	3	APOC1/APOA1/APOA2
R-HSA-8963899	Plasma lipoprotein remodeling	3/83	30/10654	0.00159042	0.00958794	0.00717481	335/336/5360	3	APOA1/APOA2/PLTP
R-HSA-174824	Plasma lipoprotein assembly, remodeling, and clearance	4/83	69/10654	0.00201546	0.0118128	0.00883974	341/335/336/5360	4	APOC1/APOA1/APOA2/PLTP
R-HSA-1474244	Extracellular matrix organization	8/83	301/10654	0.00232318	0.0132484	0.00991398	2244/7448/1293/5118/1311/2335/7450/2243	8	FGB/VTN/COL6A3/PCOLCE/COMP/FN1/VWF/FGA
R-HSA-8964058	HDL remodeling	2/83	10/10654	0.00259118	0.0143879	0.0107667	335/5360	2	APOA1/PLTP
R-HSA-3000178	ECM proteoglycans	4/83	76/10654	0.00287052	0.0154389	0.0115532	7448/1293/1311/2335	4	VTN/COL6A3/COMP/FN1
R-HSA-9029569	NR1H3 & NR1H2 regulate gene expression linked to cholesterol transport and efflux	3/83	37/10654	0.0029268	0.0154389	0.0115532	341/347/5360	3	APOC1/APOD/PLTP
R-HSA-430116	GP1b-IX-V activation signalling	2/83	12/10654	0.00376214	0.0193613	0.0144884	7450/2811	2	VWF/GP1BA
R-HSA-1237044	Erythrocytes take up carbon dioxide and release oxygen	2/83	13/10654	0.00442376	0.0217073	0.0162439	759/3039	2	CA1/HBA1
R-HSA-1480926	O2/CO2 exchange in erythrocytes	2/83	13/10654	0.00442376	0.0217073	0.0162439	759/3039	2	CA1/HBA1
R-HSA-9024446	NR1H2 and NR1H3-mediated signaling	3/83	47/10654	0.00577633	0.0276421	0.020685	341/347/5360	3	APOC1/APOD/PLTP
R-HSA-75892	Platelet Adhesion to exposed collagen	2/83	15/10654	0.00589523	0.0276421	0.020685	7450/2811	2	VWF/GP1BA
R-HSA-3000480	Scavenging by Class A Receptors	2/83	19/10654	0.00940919	0.0422412	0.0316098	335/78989	2	APOA1/COLEC11
R-HSA-5686938	Regulation of TLR by endogenous ligand	2/83	19/10654	0.00940919	0.0422412	0.0316098	2244/2243	2	FGB/FGA
R-HSA-977225	Amyloid fiber formation	4/83	109/10654	0.0102611	0.045106	0.0337535	335/1471/2243/2934	4	APOA1/CST3/FGA/GSN
