# Supplementary material for: Precision environmental health monitoring by longitudinal exposome and multi-omics profiling
Source: Genome Res. 2022 Jun;32(6):1199–214. doi: 10.1101/gr.276521.121 (PMC9248886; doi:10.1101/gr.276521.121)
Supplement: Supplemental Material [file supp_gr.276521.121_Supplemental_Data_S6.xlsx]

## Sheet: GO
Supplemental Data S6. Pathway enrichment results for proteins connected with the biological exposome.
ONTOLOGY	ID	Description	GeneRatio	BgRatio	pvalue	p.adjust	qvalue	geneID	Count	geneName
BP	GO:0072376	protein activation cascade	62/228	198/18670	1.44545e-71	4.50402e-68	3.5482e-68	3078/3827/2160/3426/1370/2220/1361/3818/10747/1369/715/462/2/733/716/4153/2147/2161/731/3075/2192/325/717/922/718/2243/720/5199/78989/350/5648/10877/722/2159/729/629/712/735/2811/730/1191/3080/81494/2158/2244/7448/5627/51279/727/732/710/725/8547/1675/713/714/7450/2155/721/100423062/2162/2266	62	CFHR1/KNG1/F11/CFI/CPN2/FCN2/CPB2/KLKB1/MASP2/CPN1/C1R/SERPINC1/A2M/C8G/C1S/MBL2/F2/F12/C8A/CFH/FBLN1/APCS/C2/CD5L/C3/FGA/C4A/CFP/COLEC11/APOH/MASP1/CFHR4/C4BPA/F10/C6/CFB/C1QA/C9/GP1BA/C7/CLU/CFHR2/CFHR5/F9/FGB/VTN/PROS1/C1RL/C5/C8B/SERPING1/C4BPB/FCN3/CFD/C1QB/C1QC/VWF/F7/C4B/IGLL5/F13A1/FGG
BP	GO:0002526	acute inflammatory response	57/228	220/18670	2.88831e-60	4.49999e-57	3.54503e-57	3078/3426/6289/1370/1361/3818/1369/715/462/2/733/716/4153/2147/2161/731/3075/325/717/6291/3700/922/718/197/720/5199/445/10877/5004/722/6288/729/3250/629/712/735/5345/730/1191/3080/5265/336/81494/7448/5627/727/732/5005/3240/710/3929/725/713/714/721/12/2335	57	CFHR1/CFI/SAA2/CPN2/CPB2/KLKB1/CPN1/C1R/SERPINC1/A2M/C8G/C1S/MBL2/F2/F12/C8A/CFH/APCS/C2/SAA4/ITIH4/CD5L/C3/AHSG/C4A/CFP/ASS1/CFHR4/ORM1/C4BPA/SAA1/C6/HPR/CFB/C1QA/C9/SERPINF2/C7/CLU/CFHR2/SERPINA1/APOA2/CFHR5/VTN/PROS1/C5/C8B/ORM2/HP/SERPING1/LBP/C4BPB/C1QB/C1QC/C4B/SERPINA3/FN1
BP	GO:0002576	platelet degranulation	43/228	128/18670	8.11542e-51	8.42922e-48	6.64041e-48	3827/7018/8407/5340/2/2316/3700/5196/2153/2243/197/3699/350/5004/5267/213/3959/83706/7094/3481/5345/1191/5265/335/2244/7123/5627/22915/5005/3273/1/710/7414/1675/10447/5473/7450/1893/7273/2162/12/2266/2335	43	KNG1/TF/TAGLN2/PLG/A2M/FLNA/ITIH4/PF4/F5/FGA/AHSG/ITIH3/APOH/ORM1/SERPINA4/ALB/LGALS3BP/FERMT3/TLN1/IGF2/SERPINF2/CLU/SERPINA1/APOA1/FGB/CLEC3B/PROS1/MMRN1/ORM2/HRG/A1BG/SERPING1/VCL/CFD/FAM3C/PPBP/VWF/ECM1/TTN/F13A1/SERPINA3/FGG/FN1
BP	GO:0006956	complement activation	46/228	175/18670	9.38614e-49	7.31181e-46	5.76013e-46	3078/3426/1370/2220/1361/10747/1369/715/2/733/716/4153/2147/731/3075/325/717/922/718/720/5199/78989/5648/10877/722/729/629/712/735/730/1191/3080/81494/7448/5627/51279/727/732/710/725/8547/1675/713/714/721/100423062	46	CFHR1/CFI/CPN2/FCN2/CPB2/MASP2/CPN1/C1R/A2M/C8G/C1S/MBL2/F2/C8A/CFH/APCS/C2/CD5L/C3/C4A/CFP/COLEC11/MASP1/CFHR4/C4BPA/C6/CFB/C1QA/C9/C7/CLU/CFHR2/CFHR5/VTN/PROS1/C1RL/C5/C8B/SERPING1/C4BPB/FCN3/CFD/C1QB/C1QC/C4B/IGLL5
BP	GO:0006959	humoral immune response	57/228	356/18670	1.72025e-47	1.07206e-44	8.44551e-45	3078/3426/5788/1370/2220/1361/10747/1369/114770/715/2/733/716/4153/2147/731/3075/325/717/5196/922/718/2243/720/5199/78989/5648/10877/722/729/629/2597/712/4069/735/730/1191/3080/81494/2244/7448/5627/51279/727/732/3273/710/725/820/8547/1675/713/714/5473/3263/721/100423062	57	CFHR1/CFI/PTPRC/CPN2/FCN2/CPB2/MASP2/CPN1/PGLYRP2/C1R/A2M/C8G/C1S/MBL2/F2/C8A/CFH/APCS/C2/PF4/CD5L/C3/FGA/C4A/CFP/COLEC11/MASP1/CFHR4/C4BPA/C6/CFB/GAPDH/C1QA/LYZ/C9/C7/CLU/CFHR2/CFHR5/FGB/VTN/PROS1/C1RL/C5/C8B/HRG/SERPING1/C4BPB/CAMP/FCN3/CFD/C1QB/C1QC/PPBP/HPX/C4B/IGLL5
BP	GO:0016485	protein processing	53/228	328/18670	2.77965e-44	1.44356e-41	1.13722e-41	3078/2160/3426/1370/4627/1361/3818/1369/715/2/733/716/2147/2161/731/3075/717/922/718/2243/720/5199/1311/350/2023/10877/722/729/629/2934/712/735/5345/730/1191/3080/81494/2158/2244/7448/7123/5627/51279/727/732/710/725/10939/713/714/2155/721/2266	53	CFHR1/F11/CFI/CPN2/MYH9/CPB2/KLKB1/CPN1/C1R/A2M/C8G/C1S/F2/F12/C8A/CFH/C2/CD5L/C3/FGA/C4A/CFP/COMP/APOH/ENO1/CFHR4/C4BPA/C6/CFB/GSN/C1QA/C9/SERPINF2/C7/CLU/CFHR2/CFHR5/F9/FGB/VTN/CLEC3B/PROS1/C1RL/C5/C8B/SERPING1/C4BPB/AFG3L2/C1QB/C1QC/F7/C4B/FGG
BP	GO:0070613	regulation of protein processing	43/228	180/18670	1.42695e-43	6.35196e-41	5.00398e-41	3078/3426/1370/4627/1361/3818/1369/715/2/733/716/2147/2161/731/3075/717/922/718/720/5199/2023/10877/722/729/629/2934/712/735/5345/730/1191/3080/81494/7448/7123/5627/727/732/710/725/713/714/721	43	CFHR1/CFI/CPN2/MYH9/CPB2/KLKB1/CPN1/C1R/A2M/C8G/C1S/F2/F12/C8A/CFH/C2/CD5L/C3/C4A/CFP/ENO1/CFHR4/C4BPA/C6/CFB/GSN/C1QA/C9/SERPINF2/C7/CLU/CFHR2/CFHR5/VTN/CLEC3B/PROS1/C5/C8B/SERPING1/C4BPB/C1QB/C1QC/C4B
BP	GO:1903317	regulation of protein maturation	43/228	182/18670	2.40291e-43	9.35933e-41	7.37313e-41	3078/3426/1370/4627/1361/3818/1369/715/2/733/716/2147/2161/731/3075/717/922/718/720/5199/2023/10877/722/729/629/2934/712/735/5345/730/1191/3080/81494/7448/7123/5627/727/732/710/725/713/714/721	43	CFHR1/CFI/CPN2/MYH9/CPB2/KLKB1/CPN1/C1R/A2M/C8G/C1S/F2/F12/C8A/CFH/C2/CD5L/C3/C4A/CFP/ENO1/CFHR4/C4BPA/C6/CFB/GSN/C1QA/C9/SERPINF2/C7/CLU/CFHR2/CFHR5/VTN/CLEC3B/PROS1/C5/C8B/SERPING1/C4BPB/C1QB/C1QC/C4B
BP	GO:2000257	regulation of protein activation cascade	37/228	116/18670	9.54804e-43	3.30574e-40	2.60421e-40	3078/3426/1370/1361/1369/715/462/2/733/716/2147/731/3075/717/922/718/720/5199/10877/722/729/629/712/735/730/1191/3080/81494/7448/5627/727/732/710/725/713/714/721	37	CFHR1/CFI/CPN2/CPB2/CPN1/C1R/SERPINC1/A2M/C8G/C1S/F2/C8A/CFH/C2/CD5L/C3/C4A/CFP/CFHR4/C4BPA/C6/CFB/C1QA/C9/C7/CLU/CFHR2/CFHR5/VTN/PROS1/C5/C8B/SERPING1/C4BPB/C1QB/C1QC/C4B
BP	GO:0002920	regulation of humoral immune response	38/228	134/18670	1.15499e-41	3.59894e-39	2.83519e-39	3078/3426/5788/1370/1361/1369/715/2/733/716/2147/731/3075/717/922/718/720/5199/10877/722/729/629/712/735/730/1191/3080/81494/7448/5627/727/732/710/725/713/714/3263/721	38	CFHR1/CFI/PTPRC/CPN2/CPB2/CPN1/C1R/A2M/C8G/C1S/F2/C8A/CFH/C2/CD5L/C3/C4A/CFP/CFHR4/C4BPA/C6/CFB/C1QA/C9/C7/CLU/CFHR2/CFHR5/VTN/PROS1/C5/C8B/SERPING1/C4BPB/C1QB/C1QC/HPX/C4B
BP	GO:0030449	regulation of complement activation	36/228	115/18670	2.94529e-41	8.3432e-39	6.57264e-39	3078/3426/1370/1361/1369/715/2/733/716/2147/731/3075/717/922/718/720/5199/10877/722/729/629/712/735/730/1191/3080/81494/7448/5627/727/732/710/725/713/714/721	36	CFHR1/CFI/CPN2/CPB2/CPN1/C1R/A2M/C8G/C1S/F2/C8A/CFH/C2/CD5L/C3/C4A/CFP/CFHR4/C4BPA/C6/CFB/C1QA/C9/C7/CLU/CFHR2/CFHR5/VTN/PROS1/C5/C8B/SERPING1/C4BPB/C1QB/C1QC/C4B
BP	GO:0002673	regulation of acute inflammatory response	39/228	159/18670	5.23124e-40	1.35838e-37	1.07011e-37	3078/3426/1370/1361/3818/1369/715/2/733/716/2147/2161/731/3075/325/717/922/718/720/5199/10877/722/729/629/712/735/730/1191/3080/81494/7448/5627/727/732/710/725/713/714/721	39	CFHR1/CFI/CPN2/CPB2/KLKB1/CPN1/C1R/A2M/C8G/C1S/F2/F12/C8A/CFH/APCS/C2/CD5L/C3/C4A/CFP/CFHR4/C4BPA/C6/CFB/C1QA/C9/C7/CLU/CFHR2/CFHR5/VTN/PROS1/C5/C8B/SERPING1/C4BPB/C1QB/C1QC/C4B
BP	GO:0051604	protein maturation	53/228	397/18670	8.09787e-40	1.941e-37	1.52909e-37	3078/2160/3426/1370/4627/1361/3818/1369/715/2/733/716/2147/2161/731/3075/717/922/718/2243/720/5199/1311/350/2023/10877/722/729/629/2934/712/735/5345/730/1191/3080/81494/2158/2244/7448/7123/5627/51279/727/732/710/725/10939/713/714/2155/721/2266	53	CFHR1/F11/CFI/CPN2/MYH9/CPB2/KLKB1/CPN1/C1R/A2M/C8G/C1S/F2/F12/C8A/CFH/C2/CD5L/C3/FGA/C4A/CFP/COMP/APOH/ENO1/CFHR4/C4BPA/C6/CFB/GSN/C1QA/C9/SERPINF2/C7/CLU/CFHR2/CFHR5/F9/FGB/VTN/CLEC3B/PROS1/C1RL/C5/C8B/SERPING1/C4BPB/AFG3L2/C1QB/C1QC/F7/C4B/FGG
BP	GO:0007596	blood coagulation	49/228	336/18670	1.20588e-38	2.68395e-36	2.11437e-36	3043/3827/348/2160/2165/4627/1361/5340/3818/462/2/3045/832/2147/2161/2192/2316/7001/5196/2153/2243/1311/350/6288/2159/83706/7094/3053/2811/5345/5265/2158/2244/7448/5627/8858/22915/3273/710/7414/725/5624/7450/2155/2162/2266/3611/51156/5104	49	HBB/KNG1/APOE/F11/F13B/MYH9/CPB2/PLG/KLKB1/SERPINC1/A2M/HBD/CAPZB/F2/F12/FBLN1/FLNA/PRDX2/PF4/F5/FGA/COMP/APOH/SAA1/F10/FERMT3/TLN1/SERPIND1/GP1BA/SERPINF2/SERPINA1/F9/FGB/VTN/PROS1/PROZ/MMRN1/HRG/SERPING1/VCL/C4BPB/PROC/VWF/F7/F13A1/FGG/ILK/SERPINA10/SERPINA5
BP	GO:0007599	hemostasis	49/228	341/18670	2.50884e-38	5.2117e-36	4.10569e-36	3043/3827/348/2160/2165/4627/1361/5340/3818/462/2/3045/832/2147/2161/2192/2316/7001/5196/2153/2243/1311/350/6288/2159/83706/7094/3053/2811/5345/5265/2158/2244/7448/5627/8858/22915/3273/710/7414/725/5624/7450/2155/2162/2266/3611/51156/5104	49	HBB/KNG1/APOE/F11/F13B/MYH9/CPB2/PLG/KLKB1/SERPINC1/A2M/HBD/CAPZB/F2/F12/FBLN1/FLNA/PRDX2/PF4/F5/FGA/COMP/APOH/SAA1/F10/FERMT3/TLN1/SERPIND1/GP1BA/SERPINF2/SERPINA1/F9/FGB/VTN/PROS1/PROZ/MMRN1/HRG/SERPING1/VCL/C4BPB/PROC/VWF/F7/F13A1/FGG/ILK/SERPINA10/SERPINA5
BP	GO:0050817	coagulation	49/228	342/18670	2.90042e-38	5.64857e-36	4.44986e-36	3043/3827/348/2160/2165/4627/1361/5340/3818/462/2/3045/832/2147/2161/2192/2316/7001/5196/2153/2243/1311/350/6288/2159/83706/7094/3053/2811/5345/5265/2158/2244/7448/5627/8858/22915/3273/710/7414/725/5624/7450/2155/2162/2266/3611/51156/5104	49	HBB/KNG1/APOE/F11/F13B/MYH9/CPB2/PLG/KLKB1/SERPINC1/A2M/HBD/CAPZB/F2/F12/FBLN1/FLNA/PRDX2/PF4/F5/FGA/COMP/APOH/SAA1/F10/FERMT3/TLN1/SERPIND1/GP1BA/SERPINF2/SERPINA1/F9/FGB/VTN/PROS1/PROZ/MMRN1/HRG/SERPING1/VCL/C4BPB/PROC/VWF/F7/F13A1/FGG/ILK/SERPINA10/SERPINA5
BP	GO:0050727	regulation of inflammatory response	50/228	485/18670	5.17971e-32	9.49411e-30	7.47931e-30	3078/348/3426/5788/1370/1361/3818/1369/715/2/733/716/2147/2161/731/3075/325/717/922/718/197/720/5199/10877/722/6288/729/629/712/735/730/1191/3080/335/81494/7448/5627/727/732/9370/710/3929/725/713/714/5624/347/183/721/5176	50	CFHR1/APOE/CFI/PTPRC/CPN2/CPB2/KLKB1/CPN1/C1R/A2M/C8G/C1S/F2/F12/C8A/CFH/APCS/C2/CD5L/C3/AHSG/C4A/CFP/CFHR4/C4BPA/SAA1/C6/CFB/C1QA/C9/C7/CLU/CFHR2/APOA1/CFHR5/VTN/PROS1/C5/C8B/ADIPOQ/SERPING1/LBP/C4BPB/C1QB/C1QC/PROC/APOD/AGT/C4B/SERPINF1
BP	GO:0072378	blood coagulation, fibrin clot formation	19/228	27/18670	4.23909e-31	7.33834e-29	5.78103e-29	3827/2160/3818/462/2/2147/2161/2192/2243/350/2159/2811/2158/2244/710/7450/2155/2162/2266	19	KNG1/F11/KLKB1/SERPINC1/A2M/F2/F12/FBLN1/FGA/APOH/F10/GP1BA/F9/FGB/SERPING1/VWF/F7/F13A1/FGG
BP	GO:0002697	regulation of immune effector process	45/228	458/18670	7.03621e-28	1.15394e-25	9.09055e-26	3078/3426/5788/1370/567/1361/1369/114770/715/2/7037/733/716/2147/731/3075/717/922/718/720/5199/5950/10877/722/729/629/712/735/730/1191/3080/335/336/81494/7448/5627/727/732/710/3929/725/713/714/3263/721	45	CFHR1/CFI/PTPRC/CPN2/B2M/CPB2/CPN1/PGLYRP2/C1R/A2M/TFRC/C8G/C1S/F2/C8A/CFH/C2/CD5L/C3/C4A/CFP/RBP4/CFHR4/C4BPA/C6/CFB/C1QA/C9/C7/CLU/CFHR2/APOA1/APOA2/CFHR5/VTN/PROS1/C5/C8B/SERPING1/LBP/C4BPB/C1QB/C1QC/HPX/C4B
BP	GO:1900046	regulation of hemostasis	23/228	80/18670	1.18995e-25	1.85394e-23	1.46051e-23	3827/348/2160/1361/5340/3818/462/2147/2161/7001/2243/1311/350/2811/5345/2244/7448/5627/3273/710/5624/2155/2266	23	KNG1/APOE/F11/CPB2/PLG/KLKB1/SERPINC1/F2/F12/PRDX2/FGA/COMP/APOH/GP1BA/SERPINF2/FGB/VTN/PROS1/HRG/SERPING1/PROC/F7/FGG
BP	GO:0002455	humoral immune response mediated by circulating immunoglobulin	28/228	150/18670	2.58995e-25	3.84299e-23	3.02745e-23	3426/5788/10747/715/733/716/4153/731/325/717/718/720/722/729/712/735/730/1191/51279/727/732/710/725/713/714/3263/721/100423062	28	CFI/PTPRC/MASP2/C1R/C8G/C1S/MBL2/C8A/APCS/C2/C3/C4A/C4BPA/C6/C1QA/C9/C7/CLU/C1RL/C5/C8B/SERPING1/C4BPB/C1QB/C1QC/HPX/C4B/IGLL5
BP	GO:1900047	negative regulation of hemostasis	20/228	54/18670	5.20975e-25	7.37891e-23	5.81299e-23	3827/348/2160/1361/5340/3818/2147/2161/2243/1311/350/2811/5345/2244/7448/5627/3273/710/5624/2266	20	KNG1/APOE/F11/CPB2/PLG/KLKB1/F2/F12/FGA/COMP/APOH/GP1BA/SERPINF2/FGB/VTN/PROS1/HRG/SERPING1/PROC/FGG
BP	GO:0030193	regulation of blood coagulation	22/228	79/18670	3.09153e-24	4.18835e-22	3.29952e-22	3827/348/2160/1361/5340/3818/462/2147/2161/7001/2243/350/2811/5345/2244/7448/5627/3273/710/5624/2155/2266	22	KNG1/APOE/F11/CPB2/PLG/KLKB1/SERPINC1/F2/F12/PRDX2/FGA/APOH/GP1BA/SERPINF2/FGB/VTN/PROS1/HRG/SERPING1/PROC/F7/FGG
BP	GO:0010466	negative regulation of peptidase activity	33/228	262/18670	5.62859e-24	7.30779e-22	5.75697e-22	3827/462/2/3700/221476/718/197/720/3699/866/5267/26998/2597/3053/5345/5265/7448/6906/5627/1293/3698/727/3273/710/1471/1893/183/721/3697/5176/12/51156/5104	33	KNG1/SERPINC1/A2M/ITIH4/PI16/C3/AHSG/C4A/ITIH3/SERPINA6/SERPINA4/FETUB/GAPDH/SERPIND1/SERPINF2/SERPINA1/VTN/SERPINA7/PROS1/COL6A3/ITIH2/C5/HRG/SERPING1/CST3/ECM1/AGT/C4B/ITIH1/SERPINF1/SERPINA3/SERPINA10/SERPINA5
BP	GO:0006958	complement activation, classical pathway	26/228	137/18670	9.16632e-24	1.14249e-21	9.00036e-22	3426/10747/715/733/716/4153/731/325/717/718/720/722/729/712/735/730/1191/51279/727/732/710/725/713/714/721/100423062	26	CFI/MASP2/C1R/C8G/C1S/MBL2/C8A/APCS/C2/C3/C4A/C4BPA/C6/C1QA/C9/C7/CLU/C1RL/C5/C8B/SERPING1/C4BPB/C1QB/C1QC/C4B/IGLL5
BP	GO:0050818	regulation of coagulation	22/228	84/18670	1.39849e-23	1.67603e-21	1.32035e-21	3827/348/2160/1361/5340/3818/462/2147/2161/7001/2243/350/2811/5345/2244/7448/5627/3273/710/5624/2155/2266	22	KNG1/APOE/F11/CPB2/PLG/KLKB1/SERPINC1/F2/F12/PRDX2/FGA/APOH/GP1BA/SERPINF2/FGB/VTN/PROS1/HRG/SERPING1/PROC/F7/FGG
BP	GO:0045861	negative regulation of proteolysis	37/228	363/18670	1.60931e-23	1.85727e-21	1.46313e-21	3827/1361/462/2/2147/3700/221476/718/197/720/3699/722/866/5267/26998/2597/3053/5345/5265/7448/6906/5627/1293/3698/727/3273/710/725/1471/1893/183/721/3697/5176/12/51156/5104	37	KNG1/CPB2/SERPINC1/A2M/F2/ITIH4/PI16/C3/AHSG/C4A/ITIH3/C4BPA/SERPINA6/SERPINA4/FETUB/GAPDH/SERPIND1/SERPINF2/SERPINA1/VTN/SERPINA7/PROS1/COL6A3/ITIH2/C5/HRG/SERPING1/C4BPB/CST3/ECM1/AGT/C4B/ITIH1/SERPINF1/SERPINA3/SERPINA10/SERPINA5
BP	GO:0030195	negative regulation of blood coagulation	19/228	53/18670	1.72052e-23	1.9147e-21	1.50837e-21	3827/348/2160/1361/5340/3818/2147/2161/2243/350/2811/5345/2244/7448/5627/3273/710/5624/2266	19	KNG1/APOE/F11/CPB2/PLG/KLKB1/F2/F12/FGA/APOH/GP1BA/SERPINF2/FGB/VTN/PROS1/HRG/SERPING1/PROC/FGG
BP	GO:0050819	negative regulation of coagulation	19/228	57/18670	8.82097e-23	9.47798e-21	7.46661e-21	3827/348/2160/1361/5340/3818/2147/2161/2243/350/2811/5345/2244/7448/5627/3273/710/5624/2266	19	KNG1/APOE/F11/CPB2/PLG/KLKB1/F2/F12/FGA/APOH/GP1BA/SERPINF2/FGB/VTN/PROS1/HRG/SERPING1/PROC/FGG
BP	GO:0019835	cytolysis	17/228	40/18670	1.13198e-22	1.17575e-20	9.26238e-21	3078/2822/733/2147/731/8542/5196/729/4069/735/730/3080/81494/727/732/3273/3929	17	CFHR1/GPLD1/C8G/F2/C8A/APOL1/PF4/C6/LYZ/C9/C7/CFHR2/CFHR5/C5/C8B/HRG/LBP
BP	GO:0010951	negative regulation of endopeptidase activity	31/228	250/18670	2.33471e-22	2.34676e-20	1.84874e-20	3827/462/2/3700/718/197/720/3699/866/5267/26998/2597/3053/5345/5265/7448/6906/5627/1293/3698/727/3273/710/1471/183/721/3697/5176/12/51156/5104	31	KNG1/SERPINC1/A2M/ITIH4/C3/AHSG/C4A/ITIH3/SERPINA6/SERPINA4/FETUB/GAPDH/SERPIND1/SERPINF2/SERPINA1/VTN/SERPINA7/PROS1/COL6A3/ITIH2/C5/HRG/SERPING1/CST3/AGT/C4B/ITIH1/SERPINF1/SERPINA3/SERPINA10/SERPINA5
BP	GO:0042730	fibrinolysis	15/228	28/18670	4.09746e-22	3.98991e-20	3.14319e-20	2160/1361/5340/3818/2147/2161/2243/350/2811/5345/2244/5627/3273/710/2266	15	F11/CPB2/PLG/KLKB1/F2/F12/FGA/APOH/GP1BA/SERPINF2/FGB/PROS1/HRG/SERPING1/FGG
BP	GO:0016064	immunoglobulin mediated immune response	29/228	218/18670	7.69296e-22	7.26402e-20	5.72248e-20	3426/5788/10747/715/7037/733/716/4153/731/325/717/718/720/722/729/712/735/730/1191/51279/727/732/710/725/713/714/3263/721/100423062	29	CFI/PTPRC/MASP2/C1R/TFRC/C8G/C1S/MBL2/C8A/APCS/C2/C3/C4A/C4BPA/C6/C1QA/C9/C7/CLU/C1RL/C5/C8B/SERPING1/C4BPB/C1QB/C1QC/HPX/C4B/IGLL5
BP	GO:0019724	B cell mediated immunity	29/228	221/18670	1.13932e-21	1.04416e-19	8.2257e-20	3426/5788/10747/715/7037/733/716/4153/731/325/717/718/720/722/729/712/735/730/1191/51279/727/732/710/725/713/714/3263/721/100423062	29	CFI/PTPRC/MASP2/C1R/TFRC/C8G/C1S/MBL2/C8A/APCS/C2/C3/C4A/C4BPA/C6/C1QA/C9/C7/CLU/C1RL/C5/C8B/SERPING1/C4BPB/C1QB/C1QC/HPX/C4B/IGLL5
BP	GO:0061045	negative regulation of wound healing	20/228	76/18670	1.3966e-21	1.24338e-19	9.79512e-20	3827/348/2160/1361/5340/3818/2147/2161/325/2243/350/2811/5345/2244/7448/5627/3273/710/5624/2266	20	KNG1/APOE/F11/CPB2/PLG/KLKB1/F2/F12/APCS/FGA/APOH/GP1BA/SERPINF2/FGB/VTN/PROS1/HRG/SERPING1/PROC/FGG
BP	GO:0006953	acute-phase response	17/228	47/18670	3.24361e-21	2.80752e-19	2.21172e-19	6289/4153/2147/325/6291/3700/197/445/5004/6288/5345/5265/5005/3240/3929/12/2335	17	SAA2/MBL2/F2/APCS/SAA4/ITIH4/AHSG/ASS1/ORM1/SAA1/SERPINF2/SERPINA1/ORM2/HP/LBP/SERPINA3/FN1
BP	GO:0051346	negative regulation of hydrolase activity	38/228	466/18670	1.06547e-20	8.97296e-19	7.06876e-19	3827/462/2/325/3700/221476/718/197/720/3699/866/5267/26998/2597/3053/5345/5265/335/336/7448/6906/5627/1293/3698/727/3273/710/341/1471/1893/183/721/3697/5176/12/345/51156/5104	38	KNG1/SERPINC1/A2M/APCS/ITIH4/PI16/C3/AHSG/C4A/ITIH3/SERPINA6/SERPINA4/FETUB/GAPDH/SERPIND1/SERPINF2/SERPINA1/APOA1/APOA2/VTN/SERPINA7/PROS1/COL6A3/ITIH2/C5/HRG/SERPING1/APOC1/CST3/ECM1/AGT/C4B/ITIH1/SERPINF1/SERPINA3/APOC3/SERPINA10/SERPINA5
BP	GO:0006957	complement activation, alternative pathway	12/228	16/18670	1.43398e-20	1.17587e-18	9.2633e-19	733/731/3075/718/5199/629/735/730/81494/727/732/1675	12	C8G/C8A/CFH/C3/CFP/CFB/C9/C7/CFHR5/C5/C8B/CFD
BP	GO:0061041	regulation of wound healing	24/228	148/18670	2.58142e-20	2.06249e-18	1.62479e-18	3827/348/2160/4627/1361/5340/3818/462/2147/2161/325/7001/2243/350/2811/5345/2244/7448/5627/3273/710/5624/2155/2266	24	KNG1/APOE/F11/MYH9/CPB2/PLG/KLKB1/SERPINC1/F2/F12/APCS/PRDX2/FGA/APOH/GP1BA/SERPINF2/FGB/VTN/PROS1/HRG/SERPING1/PROC/F7/FGG
BP	GO:0052547	regulation of peptidase activity	37/228	452/18670	3.18462e-20	2.48082e-18	1.95435e-18	3827/462/2/2192/3700/221476/718/197/720/3699/866/5267/26998/2597/2934/3053/5345/5265/5118/7448/6906/5627/1293/3698/727/3273/710/1471/1893/183/721/3697/5176/12/2335/51156/5104	37	KNG1/SERPINC1/A2M/FBLN1/ITIH4/PI16/C3/AHSG/C4A/ITIH3/SERPINA6/SERPINA4/FETUB/GAPDH/GSN/SERPIND1/SERPINF2/SERPINA1/PCOLCE/VTN/SERPINA7/PROS1/COL6A3/ITIH2/C5/HRG/SERPING1/CST3/ECM1/AGT/C4B/ITIH1/SERPINF1/SERPINA3/FN1/SERPINA10/SERPINA5
BP	GO:1903035	negative regulation of response to wounding	20/228	90/18670	5.62359e-20	4.27393e-18	3.36694e-18	3827/348/2160/1361/5340/3818/2147/2161/325/2243/350/2811/5345/2244/7448/5627/3273/710/5624/2266	20	KNG1/APOE/F11/CPB2/PLG/KLKB1/F2/F12/APCS/FGA/APOH/GP1BA/SERPINF2/FGB/VTN/PROS1/HRG/SERPING1/PROC/FGG
BP	GO:0007597	blood coagulation, intrinsic pathway	12/228	18/18670	1.43157e-19	1.06209e-17	8.36699e-18	3827/2160/3818/462/2/2147/2161/350/2811/2158/710/7450	12	KNG1/F11/KLKB1/SERPINC1/A2M/F2/F12/APOH/GP1BA/F9/SERPING1/VWF
BP	GO:1903034	regulation of response to wounding	24/228	179/18670	2.55112e-18	1.84867e-16	1.45635e-16	3827/348/2160/4627/1361/5340/3818/462/2147/2161/325/7001/2243/350/2811/5345/2244/7448/5627/3273/710/5624/2155/2266	24	KNG1/APOE/F11/MYH9/CPB2/PLG/KLKB1/SERPINC1/F2/F12/APCS/PRDX2/FGA/APOH/GP1BA/SERPINF2/FGB/VTN/PROS1/HRG/SERPING1/PROC/F7/FGG
BP	GO:0034368	protein-lipid complex remodeling	13/228	28/18670	3.03392e-18	2.10082e-16	1.655e-16	348/55937/1071/213/5360/344/335/336/3931/341/183/345/338	13	APOE/APOM/CETP/ALB/PLTP/APOC2/APOA1/APOA2/LCAT/APOC1/AGT/APOC3/APOB
BP	GO:0034369	plasma lipoprotein particle remodeling	13/228	28/18670	3.03392e-18	2.10082e-16	1.655e-16	348/55937/1071/213/5360/344/335/336/3931/341/183/345/338	13	APOE/APOM/CETP/ALB/PLTP/APOC2/APOA1/APOA2/LCAT/APOC1/AGT/APOC3/APOB
BP	GO:0034367	protein-containing complex remodeling	13/228	29/18670	5.44015e-18	3.68511e-16	2.90307e-16	348/55937/1071/213/5360/344/335/336/3931/341/183/345/338	13	APOE/APOM/CETP/ALB/PLTP/APOC2/APOA1/APOA2/LCAT/APOC1/AGT/APOC3/APOB
BP	GO:0043062	extracellular structure organization	33/228	422/18670	1.65589e-17	1.09782e-15	8.64847e-16	348/1361/55937/5340/3818/2/2192/2243/1311/7276/1071/213/4060/5360/344/5345/3936/335/336/2244/7448/1293/3931/346/341/1471/7450/183/7045/345/2266/338/2335	33	APOE/CPB2/APOM/PLG/KLKB1/A2M/FBLN1/FGA/COMP/TTR/CETP/ALB/LUM/PLTP/APOC2/SERPINF2/LCP1/APOA1/APOA2/FGB/VTN/COL6A3/LCAT/APOC4/APOC1/CST3/VWF/AGT/TGFBI/APOC3/FGG/APOB/FN1
BP	GO:0034375	high-density lipoprotein particle remodeling	11/228	18/18670	2.08804e-17	1.35549e-15	1.06783e-15	348/55937/1071/213/5360/344/335/336/3931/341/345	11	APOE/APOM/CETP/ALB/PLTP/APOC2/APOA1/APOA2/LCAT/APOC1/APOC3
BP	GO:0002449	lymphocyte mediated immunity	30/228	352/18670	5.16226e-17	3.28277e-15	2.58612e-15	3426/5788/567/10747/715/7037/733/716/4153/731/325/717/718/720/722/729/712/735/730/1191/51279/727/732/710/725/713/714/3263/721/100423062	30	CFI/PTPRC/B2M/MASP2/C1R/TFRC/C8G/C1S/MBL2/C8A/APCS/C2/C3/C4A/C4BPA/C6/C1QA/C9/C7/CLU/C1RL/C5/C8B/SERPING1/C4BPB/C1QB/C1QC/HPX/C4B/IGLL5
BP	GO:0002460	adaptive immune response based on somatic recombination of immune receptors built from immunoglobulin superfamily domains	30/228	361/18670	1.0352e-16	6.45136e-15	5.08228e-15	3426/5788/567/10747/715/7037/733/716/4153/731/325/717/718/720/722/729/712/735/730/1191/51279/727/732/710/725/713/714/3263/721/100423062	30	CFI/PTPRC/B2M/MASP2/C1R/TFRC/C8G/C1S/MBL2/C8A/APCS/C2/C3/C4A/C4BPA/C6/C1QA/C9/C7/CLU/C1RL/C5/C8B/SERPING1/C4BPB/C1QB/C1QC/HPX/C4B/IGLL5
BP	GO:0071827	plasma lipoprotein particle organization	14/228	45/18670	1.31155e-16	8.01333e-15	6.31278e-15	348/55937/1071/213/5360/344/335/336/3931/346/341/183/345/338	14	APOE/APOM/CETP/ALB/PLTP/APOC2/APOA1/APOA2/LCAT/APOC4/APOC1/AGT/APOC3/APOB
BP	GO:0052548	regulation of endopeptidase activity	32/228	425/18670	1.59132e-16	9.5357e-15	7.51207e-15	3827/462/2/3700/718/197/720/3699/866/5267/26998/2597/2934/3053/5345/5265/7448/6906/5627/1293/3698/727/3273/710/1471/183/721/3697/5176/12/51156/5104	32	KNG1/SERPINC1/A2M/ITIH4/C3/AHSG/C4A/ITIH3/SERPINA6/SERPINA4/FETUB/GAPDH/GSN/SERPIND1/SERPINF2/SERPINA1/VTN/SERPINA7/PROS1/COL6A3/ITIH2/C5/HRG/SERPING1/CST3/AGT/C4B/ITIH1/SERPINF1/SERPINA3/SERPINA10/SERPINA5
BP	GO:0071825	protein-lipid complex subunit organization	14/228	49/18670	5.08357e-16	2.98876e-14	2.3545e-14	348/55937/1071/213/5360/344/335/336/3931/346/341/183/345/338	14	APOE/APOM/CETP/ALB/PLTP/APOC2/APOA1/APOA2/LCAT/APOC4/APOC1/AGT/APOC3/APOB
BP	GO:0031638	zymogen activation	14/228	53/18670	1.73355e-15	1.00032e-13	7.88039e-14	2160/1361/3818/715/2161/2243/350/2023/5345/2158/2244/7123/51279/2266	14	F11/CPB2/KLKB1/C1R/F12/FGA/APOH/ENO1/SERPINF2/F9/FGB/CLEC3B/C1RL/FGG
BP	GO:0031639	plasminogen activation	11/228	25/18670	2.71326e-15	1.53719e-13	1.21097e-13	2160/1361/3818/2161/2243/350/2023/5345/2244/7123/2266	11	F11/CPB2/KLKB1/F12/FGA/APOH/ENO1/SERPINF2/FGB/CLEC3B/FGG
BP	GO:0032102	negative regulation of response to external stimulus	28/228	365/18670	8.9697e-15	4.991e-13	3.93183e-13	3827/348/2160/5788/1361/5340/3818/2147/2161/325/7001/2243/350/6288/2811/5345/335/2244/7448/5627/727/3273/9370/710/5624/347/5176/2266	28	KNG1/APOE/F11/PTPRC/CPB2/PLG/KLKB1/F2/F12/APCS/PRDX2/FGA/APOH/SAA1/GP1BA/SERPINF2/APOA1/FGB/VTN/PROS1/C5/HRG/ADIPOQ/SERPING1/PROC/APOD/SERPINF1/FGG
BP	GO:0051917	regulation of fibrinolysis	9/228	14/18670	9.79311e-15	5.35357e-13	4.21746e-13	2160/1361/5340/3818/2147/2161/350/5345/3273	9	F11/CPB2/PLG/KLKB1/F2/F12/APOH/SERPINF2/HRG
BP	GO:0097006	regulation of plasma lipoprotein particle levels	16/228	101/18670	9.20926e-14	4.9476e-12	3.89764e-12	348/2822/55937/1071/213/5360/344/335/336/3931/346/9370/341/183/345/338	16	APOE/GPLD1/APOM/CETP/ALB/PLTP/APOC2/APOA1/APOA2/LCAT/APOC4/ADIPOQ/APOC1/AGT/APOC3/APOB
BP	GO:0002446	neutrophil mediated immunity	31/228	499/18670	9.42133e-14	4.97574e-12	3.91981e-12	3043/5788/567/2147/3482/718/116844/197/6402/5199/7276/5004/929/2934/4069/5284/1832/5265/5005/3240/1/7414/820/23200/1675/1778/80184/1471/5473/10321/12	31	HBB/PTPRC/B2M/F2/IGF2R/C3/LRG1/AHSG/SELL/CFP/TTR/ORM1/CD14/GSN/LYZ/PIGR/DSP/SERPINA1/ORM2/HP/A1BG/VCL/CAMP/ATP11B/CFD/DYNC1H1/CEP290/CST3/PPBP/CRISP3/SERPINA3
BP	GO:0006898	receptor-mediated endocytosis	25/228	316/18670	1.33361e-13	6.92586e-12	5.45609e-12	3043/348/7018/567/7037/8542/3482/718/3039/78989/5648/6288/213/929/3250/344/1191/335/7448/3240/341/6457/3263/345/338	25	HBB/APOE/TF/B2M/TFRC/APOL1/IGF2R/C3/HBA1/COLEC11/MASP1/SAA1/ALB/CD14/HPR/APOC2/CLU/APOA1/VTN/HP/APOC1/SH3GL3/HPX/APOC3/APOB
BP	GO:0043312	neutrophil degranulation	30/228	485/18670	2.73749e-13	1.39836e-11	1.10161e-11	3043/5788/567/3482/718/116844/197/6402/5199/7276/5004/929/2934/4069/5284/1832/5265/5005/3240/1/7414/820/23200/1675/1778/80184/1471/5473/10321/12	30	HBB/PTPRC/B2M/IGF2R/C3/LRG1/AHSG/SELL/CFP/TTR/ORM1/CD14/GSN/LYZ/PIGR/DSP/SERPINA1/ORM2/HP/A1BG/VCL/CAMP/ATP11B/CFD/DYNC1H1/CEP290/CST3/PPBP/CRISP3/SERPINA3
BP	GO:0002283	neutrophil activation involved in immune response	30/228	488/18670	3.20984e-13	1.6132e-11	1.27086e-11	3043/5788/567/3482/718/116844/197/6402/5199/7276/5004/929/2934/4069/5284/1832/5265/5005/3240/1/7414/820/23200/1675/1778/80184/1471/5473/10321/12	30	HBB/PTPRC/B2M/IGF2R/C3/LRG1/AHSG/SELL/CFP/TTR/ORM1/CD14/GSN/LYZ/PIGR/DSP/SERPINA1/ORM2/HP/A1BG/VCL/CAMP/ATP11B/CFD/DYNC1H1/CEP290/CST3/PPBP/CRISP3/SERPINA3
BP	GO:0006869	lipid transport	26/228	365/18670	4.84155e-13	2.39464e-11	1.88646e-11	348/55937/5444/8542/6342/350/5950/1071/10877/5360/344/1191/335/336/3931/346/9370/3929/23200/341/347/183/345/338/319/5104	26	APOE/APOM/PON1/APOL1/SCP2/APOH/RBP4/CETP/CFHR4/PLTP/APOC2/CLU/APOA1/APOA2/LCAT/APOC4/ADIPOQ/LBP/ATP11B/APOC1/APOD/AGT/APOC3/APOB/APOF/SERPINA5
BP	GO:0030168	platelet activation	18/228	153/18670	5.05001e-13	2.45872e-11	1.93694e-11	3043/348/4627/2147/2316/5196/2243/1311/6288/83706/7094/2811/2244/3273/7414/7450/2266/3611	18	HBB/APOE/MYH9/F2/FLNA/PF4/FGA/COMP/SAA1/FERMT3/TLN1/GP1BA/FGB/HRG/VCL/VWF/FGG/ILK
BP	GO:0001867	complement activation, lectin pathway	8/228	13/18670	5.34262e-13	2.55398e-11	2.01199e-11	2220/10747/2/4153/78989/5648/710/8547	8	FCN2/MASP2/A2M/MBL2/COLEC11/MASP1/SERPING1/FCN3
BP	GO:0042119	neutrophil activation	30/228	498/18670	5.40958e-13	2.55398e-11	2.01199e-11	3043/5788/567/3482/718/116844/197/6402/5199/7276/5004/929/2934/4069/5284/1832/5265/5005/3240/1/7414/820/23200/1675/1778/80184/1471/5473/10321/12	30	HBB/PTPRC/B2M/IGF2R/C3/LRG1/AHSG/SELL/CFP/TTR/ORM1/CD14/GSN/LYZ/PIGR/DSP/SERPINA1/ORM2/HP/A1BG/VCL/CAMP/ATP11B/CFD/DYNC1H1/CEP290/CST3/PPBP/CRISP3/SERPINA3
BP	GO:0010876	lipid localization	27/228	400/18670	6.01871e-13	2.79915e-11	2.20513e-11	348/55937/5444/8542/6342/718/350/5950/1071/10877/5360/344/1191/335/336/3931/346/9370/3929/23200/341/347/183/345/338/319/5104	27	APOE/APOM/PON1/APOL1/SCP2/C3/APOH/RBP4/CETP/CFHR4/PLTP/APOC2/CLU/APOA1/APOA2/LCAT/APOC4/ADIPOQ/LBP/ATP11B/APOC1/APOD/AGT/APOC3/APOB/APOF/SERPINA5
BP	GO:0034377	plasma lipoprotein particle assembly	10/228	28/18670	6.55568e-13	3.00404e-11	2.36654e-11	348/55937/344/335/336/3931/346/341/345/338	10	APOE/APOM/APOC2/APOA1/APOA2/LCAT/APOC4/APOC1/APOC3/APOB
BP	GO:0043691	reverse cholesterol transport	9/228	20/18670	7.70914e-13	3.4814e-11	2.7426e-11	348/55937/1071/344/1191/335/336/3931/345	9	APOE/APOM/CETP/APOC2/CLU/APOA1/APOA2/LCAT/APOC3
BP	GO:0034370	triglyceride-rich lipoprotein particle remodeling	8/228	14/18670	1.23355e-12	5.49108e-11	4.32579e-11	348/1071/344/335/336/3931/345/338	8	APOE/CETP/APOC2/APOA1/APOA2/LCAT/APOC3/APOB
BP	GO:0030301	cholesterol transport	15/228	100/18670	1.27712e-12	5.60496e-11	4.4155e-11	348/55937/5444/6342/1071/5360/344/1191/335/336/3931/9370/341/345/338	15	APOE/APOM/PON1/SCP2/CETP/PLTP/APOC2/CLU/APOA1/APOA2/LCAT/ADIPOQ/APOC1/APOC3/APOB
BP	GO:0043687	post-translational protein modification	25/228	361/18670	2.6103e-12	1.12968e-10	8.89945e-11	3827/348/7018/2822/462/8542/2153/718/2243/197/720/3486/213/3053/5265/335/336/3698/1356/1471/5624/2266/338/2335/51156	25	KNG1/APOE/TF/GPLD1/SERPINC1/APOL1/F5/C3/FGA/AHSG/C4A/IGFBP3/ALB/SERPIND1/SERPINA1/APOA1/APOA2/ITIH2/CP/CST3/PROC/FGG/APOB/FN1/SERPINA10
BP	GO:0065005	protein-lipid complex assembly	10/228	32/18670	3.08809e-12	1.31815e-10	1.03842e-10	348/55937/344/335/336/3931/346/341/345/338	10	APOE/APOM/APOC2/APOA1/APOA2/LCAT/APOC4/APOC1/APOC3/APOB
BP	GO:0033344	cholesterol efflux	12/228	57/18670	3.58787e-12	1.51079e-10	1.19017e-10	348/55937/5444/1071/5360/344/335/336/9370/341/345/338	12	APOE/APOM/PON1/CETP/PLTP/APOC2/APOA1/APOA2/ADIPOQ/APOC1/APOC3/APOB
BP	GO:0030100	regulation of endocytosis	22/228	281/18670	5.18903e-12	2.15587e-10	1.69836e-10	348/7018/5788/567/4153/717/718/197/720/722/929/344/1191/335/336/7448/9370/725/341/6457/721/345	22	APOE/TF/PTPRC/B2M/MBL2/C2/C3/AHSG/C4A/C4BPA/CD14/APOC2/CLU/APOA1/APOA2/VTN/ADIPOQ/C4BPB/APOC1/SH3GL3/C4B/APOC3
BP	GO:0070527	platelet aggregation	12/228	59/18670	5.55823e-12	2.27888e-10	1.79526e-10	3043/4627/2316/2243/1311/83706/7094/2811/2244/7414/2266/3611	12	HBB/MYH9/FLNA/FGA/COMP/FERMT3/TLN1/GP1BA/FGB/VCL/FGG/ILK
BP	GO:0015918	sterol transport	15/228	112/18670	6.95401e-12	2.81412e-10	2.21692e-10	348/55937/5444/6342/1071/5360/344/1191/335/336/3931/9370/341/345/338	15	APOE/APOM/PON1/SCP2/CETP/PLTP/APOC2/CLU/APOA1/APOA2/LCAT/ADIPOQ/APOC1/APOC3/APOB
BP	GO:0030194	positive regulation of blood coagulation	9/228	26/18670	1.34568e-11	5.30777e-10	4.18138e-10	1361/5340/2147/2161/7001/350/5345/3273/2155	9	CPB2/PLG/F2/F12/PRDX2/APOH/SERPINF2/HRG/F7
BP	GO:1900048	positive regulation of hemostasis	9/228	26/18670	1.34568e-11	5.30777e-10	4.18138e-10	1361/5340/2147/2161/7001/350/5345/3273/2155	9	CPB2/PLG/F2/F12/PRDX2/APOH/SERPINF2/HRG/F7
BP	GO:0034109	homotypic cell-cell adhesion	13/228	81/18670	1.72013e-11	6.69991e-10	5.27809e-10	3043/4627/2316/2243/1311/83706/7094/2811/1832/2244/7414/2266/3611	13	HBB/MYH9/FLNA/FGA/COMP/FERMT3/TLN1/GP1BA/DSP/FGB/VCL/FGG/ILK
BP	GO:0050820	positive regulation of coagulation	9/228	27/18670	1.99722e-11	7.68314e-10	6.05266e-10	1361/5340/2147/2161/7001/350/5345/3273/2155	9	CPB2/PLG/F2/F12/PRDX2/APOH/SERPINF2/HRG/F7
BP	GO:0034372	very-low-density lipoprotein particle remodeling	7/228	12/18670	2.77811e-11	1.05568e-09	8.3165e-10	348/1071/344/335/336/3931/345	7	APOE/CETP/APOC2/APOA1/APOA2/LCAT/APOC3
BP	GO:0032371	regulation of sterol transport	11/228	63/18670	2.49532e-10	9.25646e-09	7.2921e-09	348/5444/6342/1071/5360/344/335/336/9370/341/345	11	APOE/PON1/SCP2/CETP/PLTP/APOC2/APOA1/APOA2/ADIPOQ/APOC1/APOC3
BP	GO:0032374	regulation of cholesterol transport	11/228	63/18670	2.49532e-10	9.25646e-09	7.2921e-09	348/5444/6342/1071/5360/344/335/336/9370/341/345	11	APOE/PON1/SCP2/CETP/PLTP/APOC2/APOA1/APOA2/ADIPOQ/APOC1/APOC3
BP	GO:0034378	chylomicron assembly	6/228	10/18670	6.26195e-10	2.23739e-08	1.76258e-08	348/344/335/336/345/338	6	APOE/APOC2/APOA1/APOA2/APOC3/APOB
BP	GO:0034447	very-low-density lipoprotein particle clearance	6/228	10/18670	6.26195e-10	2.23739e-08	1.76258e-08	348/344/346/341/345/338	6	APOE/APOC2/APOC4/APOC1/APOC3/APOB
BP	GO:0051918	negative regulation of fibrinolysis	6/228	10/18670	6.26195e-10	2.23739e-08	1.76258e-08	1361/5340/2147/350/5345/3273	6	CPB2/PLG/F2/APOH/SERPINF2/HRG
BP	GO:0045807	positive regulation of endocytosis	15/228	153/18670	6.31869e-10	2.23739e-08	1.76258e-08	348/7018/5788/567/4153/717/718/197/720/929/1191/335/336/7448/721	15	APOE/TF/PTPRC/B2M/MBL2/C2/C3/AHSG/C4A/CD14/CLU/APOA1/APOA2/VTN/C4B
BP	GO:0034384	high-density lipoprotein particle clearance	7/228	17/18670	6.47592e-10	2.2673e-08	1.78614e-08	348/2822/55937/344/335/336/345	7	APOE/GPLD1/APOM/APOC2/APOA1/APOA2/APOC3
BP	GO:0034381	plasma lipoprotein particle clearance	11/228	69/18670	6.93091e-10	2.39964e-08	1.8904e-08	348/2822/55937/344/335/336/346/9370/341/345/338	11	APOE/GPLD1/APOM/APOC2/APOA1/APOA2/APOC4/ADIPOQ/APOC1/APOC3/APOB
BP	GO:1905952	regulation of lipid localization	15/228	157/18670	9.08129e-10	3.10959e-08	2.44969e-08	348/5444/6342/718/1071/5360/344/335/336/346/9370/341/183/345/338	15	APOE/PON1/SCP2/C3/CETP/PLTP/APOC2/APOA1/APOA2/APOC4/ADIPOQ/APOC1/AGT/APOC3/APOB
BP	GO:0010954	positive regulation of protein processing	8/228	29/18670	1.50567e-09	5.09965e-08	4.01743e-08	4627/3818/2161/718/2023/729/2934/7123	8	MYH9/KLKB1/F12/C3/ENO1/C6/GSN/CLEC3B
BP	GO:0050764	regulation of phagocytosis	12/228	98/18670	2.65395e-09	8.79543e-08	6.9289e-08	5788/4153/717/718/197/720/722/335/336/9370/725/721	12	PTPRC/MBL2/C2/C3/AHSG/C4A/C4BPA/APOA1/APOA2/ADIPOQ/C4BPB/C4B
BP	GO:0008228	opsonization	6/228	12/18670	2.6994e-09	8.79543e-08	6.9289e-08	2220/4153/722/3929/725/721	6	FCN2/MBL2/C4BPA/LBP/C4BPB/C4B
BP	GO:0033700	phospholipid efflux	6/228	12/18670	2.6994e-09	8.79543e-08	6.9289e-08	348/344/335/336/341/345	6	APOE/APOC2/APOA1/APOA2/APOC1/APOC3
BP	GO:1903319	positive regulation of protein maturation	8/228	31/18670	2.70976e-09	8.79543e-08	6.9289e-08	4627/3818/2161/718/2023/729/2934/7123	8	MYH9/KLKB1/F12/C3/ENO1/C6/GSN/CLEC3B
BP	GO:0090303	positive regulation of wound healing	10/228	61/18670	3.16867e-09	1.01789e-07	8.01881e-08	1361/5340/2147/2161/7001/350/5345/7448/3273/2155	10	CPB2/PLG/F2/F12/PRDX2/APOH/SERPINF2/VTN/HRG/F7
BP	GO:0001906	cell killing	14/228	168/18670	1.96167e-08	6.23732e-07	4.91366e-07	5788/567/4153/2147/3075/8542/5196/922/718/2597/4069/735/3273/820	14	PTPRC/B2M/MBL2/F2/CFH/APOL1/PF4/CD5L/C3/GAPDH/LYZ/C9/HRG/CAMP
BP	GO:1903036	positive regulation of response to wounding	10/228	74/18670	2.19797e-08	6.91806e-07	5.44994e-07	1361/5340/2147/2161/7001/350/5345/7448/3273/2155	10	CPB2/PLG/F2/F12/PRDX2/APOH/SERPINF2/VTN/HRG/F7
BP	GO:0015850	organic hydroxy compound transport	17/228	262/18670	2.50035e-08	7.74145e-07	6.0986e-07	348/55937/5444/6342/5950/1071/5360/344/1191/335/336/3931/9370/341/183/345/338	17	APOE/APOM/PON1/SCP2/RBP4/CETP/PLTP/APOC2/CLU/APOA1/APOA2/LCAT/ADIPOQ/APOC1/AGT/APOC3/APOB
BP	GO:0015914	phospholipid transport	10/228	75/18670	2.50926e-08	7.74145e-07	6.0986e-07	348/6342/1071/5360/344/335/336/23200/341/345	10	APOE/SCP2/CETP/PLTP/APOC2/APOA1/APOA2/ATP11B/APOC1/APOC3
BP	GO:0030198	extracellular matrix organization	20/228	368/18670	2.81536e-08	8.60066e-07	6.77547e-07	1361/5340/3818/2/2192/2243/1311/7276/4060/5345/3936/2244/7448/1293/1471/7450/183/7045/2266/2335	20	CPB2/PLG/KLKB1/A2M/FBLN1/FGA/COMP/TTR/LUM/SERPINF2/LCP1/FGB/VTN/COL6A3/CST3/VWF/AGT/TGFBI/FGG/FN1
BP	GO:0019730	antimicrobial humoral response	12/228	122/18670	3.27853e-08	9.91834e-07	7.81351e-07	114770/2147/5196/2243/78989/2597/4069/1191/2244/3273/820/5473	12	PGLYRP2/F2/PF4/FGA/COLEC11/GAPDH/LYZ/CLU/FGB/HRG/CAMP/PPBP
BP	GO:0034433	steroid esterification	6/228	17/18670	3.43522e-08	1.00039e-06	7.88089e-07	348/335/336/3931/341/183	6	APOE/APOA1/APOA2/LCAT/APOC1/AGT
BP	GO:0034434	sterol esterification	6/228	17/18670	3.43522e-08	1.00039e-06	7.88089e-07	348/335/336/3931/341/183	6	APOE/APOA1/APOA2/LCAT/APOC1/AGT
BP	GO:0034435	cholesterol esterification	6/228	17/18670	3.43522e-08	1.00039e-06	7.88089e-07	348/335/336/3931/341/183	6	APOE/APOA1/APOA2/LCAT/APOC1/AGT
BP	GO:0042268	regulation of cytolysis	6/228	17/18670	3.43522e-08	1.00039e-06	7.88089e-07	3078/2822/5196/3080/81494/3929	6	CFHR1/GPLD1/PF4/CFHR2/CFHR5/LBP
BP	GO:0032368	regulation of lipid transport	12/228	127/18670	5.14744e-08	1.48513e-06	1.16996e-06	348/5444/6342/1071/5360/344/335/336/9370/341/183/345	12	APOE/PON1/SCP2/CETP/PLTP/APOC2/APOA1/APOA2/ADIPOQ/APOC1/AGT/APOC3
BP	GO:0051702	interaction with symbiont	10/228	82/18670	6.01086e-08	1.71834e-06	1.35368e-06	348/5340/4153/2147/325/3482/5196/2597/820/2335	10	APOE/PLG/MBL2/F2/APCS/IGF2R/PF4/GAPDH/CAMP/FN1
BP	GO:0006641	triglyceride metabolic process	11/228	105/18670	6.44297e-08	1.82512e-06	1.4378e-06	348/2822/718/350/1071/344/335/336/341/345/338	11	APOE/GPLD1/C3/APOH/CETP/APOC2/APOA1/APOA2/APOC1/APOC3/APOB
BP	GO:0045919	positive regulation of cytolysis	5/228	11/18670	1.13134e-07	3.17592e-06	2.50194e-06	3078/2822/3080/81494/3929	5	CFHR1/GPLD1/CFHR2/CFHR5/LBP
BP	GO:0006909	phagocytosis	19/228	369/18670	1.47625e-07	4.10714e-06	3.23554e-06	5788/4627/2220/4153/717/718/197/720/722/929/2934/335/336/9370/3929/725/8547/721/100423062	19	PTPRC/MYH9/FCN2/MBL2/C2/C3/AHSG/C4A/C4BPA/CD14/GSN/APOA1/APOA2/ADIPOQ/LBP/C4BPB/FCN3/C4B/IGLL5
BP	GO:0050766	positive regulation of phagocytosis	9/228	70/18670	1.75745e-07	4.84622e-06	3.81778e-06	5788/4153/717/718/197/720/335/336/721	9	PTPRC/MBL2/C2/C3/AHSG/C4A/APOA1/APOA2/C4B
BP	GO:0051873	killing by host of symbiont cells	5/228	12/18670	1.92017e-07	5.24845e-06	4.13465e-06	4153/2147/5196/2597/820	5	MBL2/F2/PF4/GAPDH/CAMP
BP	GO:0032373	positive regulation of sterol transport	6/228	23/18670	2.63527e-07	7.07889e-06	5.57664e-06	348/5444/6342/5360/335/9370	6	APOE/PON1/SCP2/PLTP/APOA1/ADIPOQ
BP	GO:0032376	positive regulation of cholesterol transport	6/228	23/18670	2.63527e-07	7.07889e-06	5.57664e-06	348/5444/6342/5360/335/9370	6	APOE/PON1/SCP2/PLTP/APOA1/ADIPOQ
BP	GO:0010872	regulation of cholesterol esterification	5/228	13/18670	3.08926e-07	8.15773e-06	6.42654e-06	348/335/336/341/183	5	APOE/APOA1/APOA2/APOC1/AGT
BP	GO:0034374	low-density lipoprotein particle remodeling	5/228	13/18670	3.08926e-07	8.15773e-06	6.42654e-06	348/1071/336/183/338	5	APOE/CETP/APOA2/AGT/APOB
BP	GO:0010755	regulation of plasminogen activation	5/228	14/18670	4.75776e-07	1.23543e-05	9.73254e-06	1361/2161/2023/5345/7123	5	CPB2/F12/ENO1/SERPINF2/CLEC3B
BP	GO:0051852	disruption by host of symbiont cells	5/228	14/18670	4.75776e-07	1.23543e-05	9.73254e-06	4153/2147/5196/2597/820	5	MBL2/F2/PF4/GAPDH/CAMP
BP	GO:0006639	acylglycerol metabolic process	11/228	129/18670	5.32398e-07	1.37103e-05	1.08008e-05	348/2822/718/350/1071/344/335/336/341/345/338	11	APOE/GPLD1/C3/APOH/CETP/APOC2/APOA1/APOA2/APOC1/APOC3/APOB
BP	GO:0006638	neutral lipid metabolic process	11/228	130/18670	5.75435e-07	1.45777e-05	1.14841e-05	348/2822/718/350/1071/344/335/336/341/345/338	11	APOE/GPLD1/C3/APOH/CETP/APOC2/APOA1/APOA2/APOC1/APOC3/APOB
BP	GO:0042157	lipoprotein metabolic process	11/228	130/18670	5.75435e-07	1.45777e-05	1.14841e-05	348/2822/55937/8542/335/336/3931/341/347/345/338	11	APOE/GPLD1/APOM/APOL1/APOA1/APOA2/LCAT/APOC1/APOD/APOC3/APOB
BP	GO:0015748	organophosphate ester transport	10/228	105/18670	6.34681e-07	1.59489e-05	1.25643e-05	348/6342/1071/5360/344/335/336/23200/341/345	10	APOE/SCP2/CETP/PLTP/APOC2/APOA1/APOA2/ATP11B/APOC1/APOC3
BP	GO:1905954	positive regulation of lipid localization	9/228	82/18670	6.97586e-07	1.73361e-05	1.36571e-05	348/5444/6342/718/5360/335/346/9370/338	9	APOE/PON1/SCP2/C3/PLTP/APOA1/APOC4/ADIPOQ/APOB
BP	GO:0034380	high-density lipoprotein particle assembly	5/228	15/18670	7.06574e-07	1.73361e-05	1.36571e-05	348/55937/335/336/3931	5	APOE/APOM/APOA1/APOA2/LCAT
BP	GO:0051883	killing of cells in other organism involved in symbiotic interaction	5/228	15/18670	7.06574e-07	1.73361e-05	1.36571e-05	4153/2147/5196/2597/820	5	MBL2/F2/PF4/GAPDH/CAMP
BP	GO:0046461	neutral lipid catabolic process	7/228	43/18670	8.1908e-07	1.97849e-05	1.55862e-05	348/2822/344/335/336/345/338	7	APOE/GPLD1/APOC2/APOA1/APOA2/APOC3/APOB
BP	GO:0046464	acylglycerol catabolic process	7/228	43/18670	8.1908e-07	1.97849e-05	1.55862e-05	348/2822/344/335/336/345/338	7	APOE/GPLD1/APOC2/APOA1/APOA2/APOC3/APOB
BP	GO:0031640	killing of cells of other organism	8/228	62/18670	8.38771e-07	1.99512e-05	1.57173e-05	4153/2147/8542/5196/2597/4069/3273/820	8	MBL2/F2/APOL1/PF4/GAPDH/LYZ/HRG/CAMP
BP	GO:0044364	disruption of cells of other organism	8/228	62/18670	8.38771e-07	1.99512e-05	1.57173e-05	4153/2147/8542/5196/2597/4069/3273/820	8	MBL2/F2/APOL1/PF4/GAPDH/LYZ/HRG/CAMP
BP	GO:0010875	positive regulation of cholesterol efflux	5/228	16/18670	1.01754e-06	2.402e-05	1.89226e-05	348/5444/5360/335/9370	5	APOE/PON1/PLTP/APOA1/ADIPOQ
BP	GO:0046503	glycerolipid catabolic process	8/228	64/18670	1.07525e-06	2.51916e-05	1.98455e-05	348/2822/344/335/336/341/345/338	8	APOE/GPLD1/APOC2/APOA1/APOA2/APOC1/APOC3/APOB
BP	GO:0051818	disruption of cells of other organism involved in symbiotic interaction	5/228	17/18670	1.4272e-06	3.31877e-05	2.61447e-05	4153/2147/5196/2597/820	5	MBL2/F2/PF4/GAPDH/CAMP
BP	GO:0031589	cell-substrate adhesion	17/228	354/18670	1.77939e-06	4.1071e-05	3.23551e-05	5340/2192/2316/2243/10894/83706/335/2244/7448/22915/3273/7414/7450/347/2266/3611/2335	17	PLG/FBLN1/FLNA/FGA/LYVE1/FERMT3/APOA1/FGB/VTN/MMRN1/HRG/VCL/VWF/APOD/FGG/ILK/FN1
BP	GO:0042744	hydrogen peroxide catabolic process	6/228	32/18670	2.15796e-06	4.94427e-05	3.89502e-05	3043/3045/7001/3039/2878/3240	6	HBB/HBD/PRDX2/HBA1/GPX3/HP
BP	GO:0010811	positive regulation of cell-substrate adhesion	10/228	121/18670	2.34848e-06	5.3415e-05	4.20795e-05	2316/2243/335/2244/7448/22915/3273/2266/3611/2335	10	FLNA/FGA/APOA1/FGB/VTN/MMRN1/HRG/FGG/ILK/FN1
BP	GO:0008203	cholesterol metabolic process	11/228	150/18670	2.38093e-06	5.37607e-05	4.23519e-05	348/5444/10449/8542/1071/335/336/3931/341/338/319	11	APOE/PON1/ACAA2/APOL1/CETP/APOA1/APOA2/LCAT/APOC1/APOB/APOF
BP	GO:0010810	regulation of cell-substrate adhesion	13/228	215/18670	2.52767e-06	5.66634e-05	4.46385e-05	5340/2192/2316/2243/335/2244/7448/22915/3273/347/2266/3611/2335	13	PLG/FBLN1/FLNA/FGA/APOA1/FGB/VTN/MMRN1/HRG/APOD/FGG/ILK/FN1
BP	GO:0042632	cholesterol homeostasis	9/228	96/18670	2.66211e-06	5.9251e-05	4.6677e-05	348/55937/1071/344/335/336/3931/345/338	9	APOE/APOM/CETP/APOC2/APOA1/APOA2/LCAT/APOC3/APOB
BP	GO:0055092	sterol homeostasis	9/228	97/18670	2.90356e-06	6.41667e-05	5.05495e-05	348/55937/1071/344/335/336/3931/345/338	9	APOE/APOM/CETP/APOC2/APOA1/APOA2/LCAT/APOC3/APOB
BP	GO:1902652	secondary alcohol metabolic process	11/228	155/18670	3.27808e-06	7.19331e-05	5.66678e-05	348/5444/10449/8542/1071/335/336/3931/341/338/319	11	APOE/PON1/ACAA2/APOL1/CETP/APOA1/APOA2/LCAT/APOC1/APOB/APOF
BP	GO:0034446	substrate adhesion-dependent cell spreading	9/228	100/18670	3.74428e-06	8.11207e-05	6.39056e-05	2192/2316/2243/83706/335/2244/2266/3611/2335	9	FBLN1/FLNA/FGA/FERMT3/APOA1/FGB/FGG/ILK/FN1
BP	GO:0019433	triglyceride catabolic process	6/228	35/18670	3.74884e-06	8.11207e-05	6.39056e-05	348/2822/344/335/345/338	6	APOE/GPLD1/APOC2/APOA1/APOC3/APOB
BP	GO:2000425	regulation of apoptotic cell clearance	4/228	10/18670	4.29456e-06	9.22887e-05	7.27036e-05	717/718/720/721	4	C2/C3/C4A/C4B
BP	GO:0098869	cellular oxidant detoxification	9/228	102/18670	4.41423e-06	9.42104e-05	7.42175e-05	3043/348/55937/3045/7001/3039/213/2878/3240	9	HBB/APOE/APOM/HBD/PRDX2/HBA1/ALB/GPX3/HP
BP	GO:0051851	modification by host of symbiont morphology or physiology	8/228	77/18670	4.46107e-06	9.45625e-05	7.44949e-05	348/4153/2147/325/3482/5196/2597/820	8	APOE/MBL2/F2/APCS/IGF2R/PF4/GAPDH/CAMP
BP	GO:0048259	regulation of receptor-mediated endocytosis	9/228	103/18670	4.7861e-06	0.000100679	7.93137e-05	7018/567/718/344/1191/7448/341/6457/345	9	TF/B2M/C3/APOC2/CLU/VTN/APOC1/SH3GL3/APOC3
BP	GO:0098754	detoxification	10/228	131/18670	4.81426e-06	0.000100679	7.93137e-05	3043/348/5446/55937/3045/7001/3039/213/2878/3240	10	HBB/APOE/PON3/APOM/HBD/PRDX2/HBA1/ALB/GPX3/HP
BP	GO:0001523	retinoid metabolic process	9/228	104/18670	5.18454e-06	0.0001077	8.48445e-05	348/55937/5950/7276/344/335/336/345/338	9	APOE/APOM/RBP4/TTR/APOC2/APOA1/APOA2/APOC3/APOB
BP	GO:0035821	modification of morphology or physiology of other organism	11/228	164/18670	5.65499e-06	0.000116695	9.19306e-05	348/4153/2147/8542/325/3482/5196/2597/4069/3273/820	11	APOE/MBL2/F2/APOL1/APCS/IGF2R/PF4/GAPDH/LYZ/HRG/CAMP
BP	GO:0016125	sterol metabolic process	11/228	166/18670	6.35205e-06	0.000130217	0.000102583	348/5444/10449/8542/1071/335/336/3931/341/338/319	11	APOE/PON1/ACAA2/APOL1/CETP/APOA1/APOA2/LCAT/APOC1/APOB/APOF
BP	GO:0002923	regulation of humoral immune response mediated by circulating immunoglobulin	4/228	11/18670	6.68395e-06	0.000134369	0.000105854	5788/722/725/3263	4	PTPRC/C4BPA/C4BPB/HPX
BP	GO:0034379	very-low-density lipoprotein particle assembly	4/228	11/18670	6.68395e-06	0.000134369	0.000105854	346/341/345/338	4	APOC4/APOC1/APOC3/APOB
BP	GO:0098883	synapse pruning	4/228	11/18670	6.68395e-06	0.000134369	0.000105854	718/712/713/714	4	C3/C1QA/C1QB/C1QC
BP	GO:0010874	regulation of cholesterol efflux	6/228	39/18670	7.23428e-06	0.000142671	0.000112394	348/5444/1071/5360/335/9370	6	APOE/PON1/CETP/PLTP/APOA1/ADIPOQ
BP	GO:0055090	acylglycerol homeostasis	6/228	39/18670	7.23428e-06	0.000142671	0.000112394	348/1071/344/335/346/345	6	APOE/CETP/APOC2/APOA1/APOC4/APOC3
BP	GO:0070328	triglyceride homeostasis	6/228	39/18670	7.23428e-06	0.000142671	0.000112394	348/1071/344/335/346/345	6	APOE/CETP/APOC2/APOA1/APOC4/APOC3
BP	GO:0016101	diterpenoid metabolic process	9/228	110/18670	8.2248e-06	0.000161185	0.000126979	348/55937/5950/7276/344/335/336/345/338	9	APOE/APOM/RBP4/TTR/APOC2/APOA1/APOA2/APOC3/APOB
BP	GO:0034113	heterotypic cell-cell adhesion	7/228	61/18670	9.20323e-06	0.000179233	0.000141197	5788/2243/1832/335/2244/9370/2266	7	PTPRC/FGA/DSP/APOA1/FGB/ADIPOQ/FGG
BP	GO:1990748	cellular detoxification	9/228	112/18670	9.52953e-06	0.000184435	0.000145295	3043/348/55937/3045/7001/3039/213/2878/3240	9	HBB/APOE/APOM/HBD/PRDX2/HBA1/ALB/GPX3/HP
BP	GO:0010955	negative regulation of protein processing	6/228	41/18670	9.76886e-06	0.000186747	0.000147116	1361/2/722/5345/710/725	6	CPB2/A2M/C4BPA/SERPINF2/SERPING1/C4BPB
BP	GO:1903318	negative regulation of protein maturation	6/228	41/18670	9.76886e-06	0.000186747	0.000147116	1361/2/722/5345/710/725	6	CPB2/A2M/C4BPA/SERPINF2/SERPING1/C4BPB
BP	GO:0002921	negative regulation of humoral immune response	4/228	12/18670	9.92992e-06	0.000188668	0.00014863	2/722/710/725	4	A2M/C4BPA/SERPING1/C4BPB
BP	GO:0035296	regulation of tube diameter	10/228	143/18670	1.04959e-05	0.00019584	0.00015428	3043/3827/348/2243/1311/5345/2244/1621/183/2266	10	HBB/KNG1/APOE/FGA/COMP/SERPINF2/FGB/DBH/AGT/FGG
BP	GO:0050880	regulation of blood vessel size	10/228	143/18670	1.04959e-05	0.00019584	0.00015428	3043/3827/348/2243/1311/5345/2244/1621/183/2266	10	HBB/KNG1/APOE/FGA/COMP/SERPINF2/FGB/DBH/AGT/FGG
BP	GO:0097746	regulation of blood vessel diameter	10/228	143/18670	1.04959e-05	0.00019584	0.00015428	3043/3827/348/2243/1311/5345/2244/1621/183/2266	10	HBB/KNG1/APOE/FGA/COMP/SERPINF2/FGB/DBH/AGT/FGG
BP	GO:0035150	regulation of tube size	10/228	144/18670	1.11602e-05	0.000206996	0.000163068	3043/3827/348/2243/1311/5345/2244/1621/183/2266	10	HBB/KNG1/APOE/FGA/COMP/SERPINF2/FGB/DBH/AGT/FGG
BP	GO:0034114	regulation of heterotypic cell-cell adhesion	5/228	26/18670	1.38699e-05	0.000255731	0.000201461	2243/335/2244/9370/2266	5	FGA/APOA1/FGB/ADIPOQ/FGG
BP	GO:0008202	steroid metabolic process	15/228	331/18670	1.45801e-05	0.000267245	0.000210531	348/5444/10449/8542/6342/1071/866/2638/335/336/3931/341/183/338/319	15	APOE/PON1/ACAA2/APOL1/SCP2/CETP/SERPINA6/GC/APOA1/APOA2/LCAT/APOC1/AGT/APOB/APOF
BP	GO:0006721	terpenoid metabolic process	9/228	120/18670	1.66692e-05	0.000303749	0.000239289	348/55937/5950/7276/344/335/336/345/338	9	APOE/APOM/RBP4/TTR/APOC2/APOA1/APOA2/APOC3/APOB
BP	GO:0055088	lipid homeostasis	10/228	151/18670	1.69108e-05	0.000304784	0.000240104	348/55937/1071/344/335/336/3931/346/345/338	10	APOE/APOM/CETP/APOC2/APOA1/APOA2/LCAT/APOC4/APOC3/APOB
BP	GO:0001819	positive regulation of cytokine production	18/228	464/18670	1.69216e-05	0.000304784	0.000240104	5788/567/5196/718/5004/6288/929/4060/2597/5345/1191/336/727/5005/9370/3929/183/3556	18	PTPRC/B2M/PF4/C3/ORM1/SAA1/CD14/LUM/GAPDH/SERPINF2/CLU/APOA2/C5/ORM2/ADIPOQ/LBP/AGT/IL1RAP
BP	GO:0043277	apoptotic cell clearance	6/228	46/18670	1.93404e-05	0.000346349	0.000272848	2220/717/718/720/8547/721	6	FCN2/C2/C3/C4A/FCN3/C4B
BP	GO:0050714	positive regulation of protein secretion	13/228	268/18670	2.7061e-05	0.00048184	0.000379586	2822/2243/5950/5004/6288/929/2597/2244/727/5005/7273/3556/2266	13	GPLD1/FGA/RBP4/ORM1/SAA1/CD14/GAPDH/FGB/C5/ORM2/TTN/IL1RAP/FGG
BP	GO:0010743	regulation of macrophage derived foam cell differentiation	5/228	30/18670	2.88753e-05	0.000508336	0.000400459	5196/1071/9370/183/338	5	PF4/CETP/ADIPOQ/AGT/APOB
BP	GO:0045940	positive regulation of steroid metabolic process	5/228	30/18670	2.88753e-05	0.000508336	0.000400459	348/335/336/341/183	5	APOE/APOA1/APOA2/APOC1/AGT
BP	GO:0031100	animal organ regeneration	7/228	73/18670	3.03624e-05	0.000531513	0.000418718	1361/3482/3936/335/336/7448/2155	7	CPB2/IGF2R/LCP1/APOA1/APOA2/VTN/F7
BP	GO:0001895	retina homeostasis	7/228	74/18670	3.31901e-05	0.000577768	0.000455156	7018/567/27031/213/4069/5284/563	7	TF/B2M/NPHP3/ALB/LYZ/PIGR/AZGP1
BP	GO:1990000	amyloid fibril formation	4/228	16/18670	3.51327e-05	0.000605082	0.000476675	348/567/2934/1191	4	APOE/B2M/GSN/CLU
BP	GO:0002712	regulation of B cell mediated immunity	6/228	51/18670	3.53418e-05	0.000605082	0.000476675	5788/7037/718/722/725/3263	6	PTPRC/TFRC/C3/C4BPA/C4BPB/HPX
BP	GO:0002889	regulation of immunoglobulin mediated immune response	6/228	51/18670	3.53418e-05	0.000605082	0.000476675	5788/7037/718/722/725/3263	6	PTPRC/TFRC/C3/C4BPA/C4BPB/HPX
BP	GO:1900024	regulation of substrate adhesion-dependent cell spreading	6/228	52/18670	3.95475e-05	0.000669913	0.000527747	2192/2316/2243/335/2244/2266	6	FBLN1/FLNA/FGA/APOA1/FGB/FGG
BP	GO:0031348	negative regulation of defense response	12/228	239/18670	3.95584e-05	0.000669913	0.000527747	348/5788/2/2147/325/6288/335/9370/710/5624/347/5176	12	APOE/PTPRC/A2M/F2/APCS/SAA1/APOA1/ADIPOQ/SERPING1/PROC/APOD/SERPINF1
BP	GO:0006066	alcohol metabolic process	15/228	364/18670	4.38165e-05	0.000738011	0.000581394	348/5444/10449/56623/8542/5950/7276/1071/335/336/1621/3931/341/338/319	15	APOE/PON1/ACAA2/INPP5E/APOL1/RBP4/TTR/CETP/APOA1/APOA2/DBH/LCAT/APOC1/APOB/APOF
BP	GO:0050728	negative regulation of inflammatory response	10/228	169/18670	4.45467e-05	0.000746277	0.000587905	348/5788/2147/325/6288/335/9370/5624/347/5176	10	APOE/PTPRC/F2/APCS/SAA1/APOA1/ADIPOQ/PROC/APOD/SERPINF1
BP	GO:0030048	actin filament-based movement	9/228	138/18670	5.0546e-05	0.000842253	0.000663514	58/4627/2316/4606/1832/6262/7171/7273/4625	9	ACTA1/MYH9/FLNA/MYBPC2/DSP/RYR2/TPM4/TTN/MYH7
BP	GO:0006720	isoprenoid metabolic process	9/228	139/18670	5.34799e-05	0.0008864	0.000698293	348/55937/5950/7276/344/335/336/345/338	9	APOE/APOM/RBP4/TTR/APOC2/APOA1/APOA2/APOC3/APOB
BP	GO:0003018	vascular process in circulatory system	10/228	173/18670	5.42999e-05	0.000895231	0.000705249	3043/3827/348/2243/1311/5345/2244/1621/183/2266	10	HBB/KNG1/APOE/FGA/COMP/SERPINF2/FGB/DBH/AGT/FGG
BP	GO:0002793	positive regulation of peptide secretion	13/228	288/18670	5.68519e-05	0.000932371	0.000734507	2822/2243/5950/5004/6288/929/2597/2244/727/5005/7273/3556/2266	13	GPLD1/FGA/RBP4/ORM1/SAA1/CD14/GAPDH/FGB/C5/ORM2/TTN/IL1RAP/FGG
BP	GO:0060192	negative regulation of lipase activity	4/228	18/18670	5.79457e-05	0.000945334	0.00074472	335/336/341/345	4	APOA1/APOA2/APOC1/APOC3
BP	GO:0006888	ER to Golgi vesicle-mediated transport	11/228	212/18670	6.18309e-05	0.00100346	0.000790514	832/2147/2153/2159/5265/2158/5627/8858/1778/5624/2155	11	CAPZB/F2/F5/F10/SERPINA1/F9/PROS1/PROZ/DYNC1H1/PROC/F7
BP	GO:0042743	hydrogen peroxide metabolic process	6/228	57/18670	6.70006e-05	0.00108173	0.00085217	3043/3045/7001/3039/2878/3240	6	HBB/HBD/PRDX2/HBA1/GPX3/HP
BP	GO:0046470	phosphatidylcholine metabolic process	7/228	83/18670	6.97842e-05	0.00111753	0.000880374	2822/5444/1071/335/336/3931/341	7	GPLD1/PON1/CETP/APOA1/APOA2/LCAT/APOC1
BP	GO:0051817	modification of morphology or physiology of other organism involved in symbiotic interaction	8/228	112/18670	6.99354e-05	0.00111753	0.000880374	348/4153/2147/325/3482/5196/2597/820	8	APOE/MBL2/F2/APCS/IGF2R/PF4/GAPDH/CAMP
BP	GO:0010742	macrophage derived foam cell differentiation	5/228	36/18670	7.19668e-05	0.00113832	0.000896749	5196/1071/9370/183/338	5	PF4/CETP/ADIPOQ/AGT/APOB
BP	GO:0090077	foam cell differentiation	5/228	36/18670	7.19668e-05	0.00113832	0.000896749	5196/1071/9370/183/338	5	PF4/CETP/ADIPOQ/AGT/APOB
BP	GO:0002922	positive regulation of humoral immune response	4/228	19/18670	7.26968e-05	0.00114406	0.000901271	5788/718/729/3263	4	PTPRC/C3/C6/HPX
BP	GO:0050708	regulation of protein secretion	17/228	472/18670	7.32871e-05	0.00114755	0.000904023	348/2822/2243/5950/5004/6288/929/2597/335/336/2244/727/5005/7273/3556/2266/2335	17	APOE/GPLD1/FGA/RBP4/ORM1/SAA1/CD14/GAPDH/APOA1/APOA2/FGB/C5/ORM2/TTN/IL1RAP/FGG/FN1
BP	GO:0017001	antibiotic catabolic process	6/228	58/18670	7.39765e-05	0.00115255	0.000907964	3043/3045/7001/3039/2878/3240	6	HBB/HBD/PRDX2/HBA1/GPX3/HP
BP	GO:0044242	cellular lipid catabolic process	11/228	217/18670	7.62375e-05	0.00118187	0.00093106	348/2822/10449/6342/344/335/336/9370/341/345/338	11	APOE/GPLD1/ACAA2/SCP2/APOC2/APOA1/APOA2/ADIPOQ/APOC1/APOC3/APOB
BP	GO:0045834	positive regulation of lipid metabolic process	9/228	146/18670	7.83224e-05	0.00120818	0.000951787	348/2822/2147/344/335/336/9370/341/183	9	APOE/GPLD1/F2/APOC2/APOA1/APOA2/ADIPOQ/APOC1/AGT
BP	GO:0030212	hyaluronan metabolic process	5/228	37/18670	8.23896e-05	0.00125846	0.000991396	3700/3699/10894/3698/3697	5	ITIH4/ITIH3/LYVE1/ITIH2/ITIH1
BP	GO:1900026	positive regulation of substrate adhesion-dependent cell spreading	5/228	37/18670	8.23896e-05	0.00125846	0.000991396	2316/2243/335/2244/2266	5	FLNA/FGA/APOA1/FGB/FGG
BP	GO:0032760	positive regulation of tumor necrosis factor production	7/228	86/18670	8.75608e-05	0.00133092	0.00104848	5788/5196/5004/929/1191/5005/3929	7	PTPRC/PF4/ORM1/CD14/CLU/ORM2/LBP
BP	GO:0070252	actin-mediated cell contraction	8/228	116/18670	8.96241e-05	0.00135567	0.00106798	58/2316/4606/1832/6262/7171/7273/4625	8	ACTA1/FLNA/MYBPC2/DSP/RYR2/TPM4/TTN/MYH7
BP	GO:0032370	positive regulation of lipid transport	6/228	61/18670	9.84399e-05	0.00148183	0.00116736	348/5444/6342/5360/335/9370	6	APOE/PON1/SCP2/PLTP/APOA1/ADIPOQ
BP	GO:1903557	positive regulation of tumor necrosis factor superfamily cytokine production	7/228	88/18670	0.000101341	0.00151817	0.00119599	5788/5196/5004/929/1191/5005/3929	7	PTPRC/PF4/ORM1/CD14/CLU/ORM2/LBP
BP	GO:0030049	muscle filament sliding	5/228	39/18670	0.000106686	0.00158302	0.00124708	58/4606/7171/7273/4625	5	ACTA1/MYBPC2/TPM4/TTN/MYH7
BP	GO:0033275	actin-myosin filament sliding	5/228	39/18670	0.000106686	0.00158302	0.00124708	58/4606/7171/7273/4625	5	ACTA1/MYBPC2/TPM4/TTN/MYH7
BP	GO:0002698	negative regulation of immune effector process	8/228	120/18670	0.0001137	0.0016791	0.00132277	5788/114770/2/722/335/336/710/725	8	PTPRC/PGLYRP2/A2M/C4BPA/APOA1/APOA2/SERPING1/C4BPB
BP	GO:0090207	regulation of triglyceride metabolic process	5/228	40/18670	0.000120723	0.00177441	0.00139785	348/2822/718/344/345	5	APOE/GPLD1/C3/APOC2/APOC3
BP	GO:1903532	positive regulation of secretion by cell	15/228	399/18670	0.000122371	0.00179018	0.00141028	2822/1361/2243/5950/5004/6288/929/2597/2244/727/5005/7273/183/3556/2266	15	GPLD1/CPB2/FGA/RBP4/ORM1/SAA1/CD14/GAPDH/FGB/C5/ORM2/TTN/AGT/IL1RAP/FGG
BP	GO:0045833	negative regulation of lipid metabolic process	7/228	92/18670	0.000134203	0.0019541	0.00153941	348/2822/344/336/341/347/345	7	APOE/GPLD1/APOC2/APOA2/APOC1/APOD/APOC3
BP	GO:0045785	positive regulation of cell adhesion	15/228	403/18670	0.000136511	0.00197846	0.0015586	5788/7037/2316/2243/6288/3481/5345/335/2244/7448/22915/3273/2266/3611/2335	15	PTPRC/TFRC/FLNA/FGA/SAA1/IGF2/SERPINF2/APOA1/FGB/VTN/MMRN1/HRG/FGG/ILK/FN1
BP	GO:0051187	cofactor catabolic process	6/228	65/18670	0.000140616	0.00202852	0.00159803	3043/3045/7001/3039/2878/3240	6	HBB/HBD/PRDX2/HBA1/GPX3/HP
BP	GO:0050900	leukocyte migration	17/228	499/18670	0.000143348	0.00205839	0.00162157	4478/4627/4485/2147/5196/6402/6288/5627/727/1621/3929/5473/347/2155/1893/338/2335	17	MSN/MYH9/MST1/F2/PF4/SELL/SAA1/PROS1/C5/DBH/LBP/PPBP/APOD/F7/ECM1/APOB/FN1
BP	GO:0002791	regulation of peptide secretion	17/228	500/18670	0.000146804	0.00209835	0.00165305	348/2822/2243/5950/5004/6288/929/2597/335/336/2244/727/5005/7273/3556/2266/2335	17	APOE/GPLD1/FGA/RBP4/ORM1/SAA1/CD14/GAPDH/APOA1/APOA2/FGB/C5/ORM2/TTN/IL1RAP/FGG/FN1
BP	GO:0045862	positive regulation of proteolysis	14/228	363/18670	0.000158096	0.00224944	0.00177208	348/4627/2822/3818/2161/2192/718/2023/729/2934/1191/5118/7123/2335	14	APOE/MYH9/GPLD1/KLKB1/F12/FBLN1/C3/ENO1/C6/GSN/CLU/PCOLCE/CLEC3B/FN1
BP	GO:0050995	negative regulation of lipid catabolic process	4/228	23/18670	0.000159832	0.00225356	0.00177532	2822/336/341/345	4	GPLD1/APOA2/APOC1/APOC3
BP	GO:0051004	regulation of lipoprotein lipase activity	4/228	23/18670	0.000159832	0.00225356	0.00177532	350/344/341/345	4	APOH/APOC2/APOC1/APOC3
BP	GO:0010038	response to metal ion	14/228	364/18670	0.000162667	0.00228321	0.00179867	58/7018/567/2822/2243/445/929/2934/712/6262/2244/7273/5176/2266	14	ACTA1/TF/B2M/GPLD1/FGA/ASS1/CD14/GSN/C1QA/RYR2/FGB/TTN/SERPINF1/FGG
BP	GO:0030258	lipid modification	11/228	238/18670	0.000172426	0.00240933	0.00189803	348/10449/56623/6342/335/336/3931/9370/341/347/183	11	APOE/ACAA2/INPP5E/SCP2/APOA1/APOA2/LCAT/ADIPOQ/APOC1/APOD/AGT
BP	GO:0050663	cytokine secretion	11/228	240/18670	0.000185448	0.00257971	0.00203226	5004/6288/929/2597/335/336/727/5005/183/3556/2335	11	ORM1/SAA1/CD14/GAPDH/APOA1/APOA2/C5/ORM2/AGT/IL1RAP/FN1
BP	GO:0002683	negative regulation of immune system process	16/228	463/18670	0.000191639	0.00265399	0.00209077	5788/114770/2/325/7001/5196/722/929/335/336/727/9370/710/725/714/347	16	PTPRC/PGLYRP2/A2M/APCS/PRDX2/PF4/C4BPA/CD14/APOA1/APOA2/C5/ADIPOQ/SERPING1/C4BPB/C1QC/APOD
BP	GO:0060191	regulation of lipase activity	7/228	98/18670	0.000199238	0.00274702	0.00216406	350/344/335/336/341/183/345	7	APOH/APOC2/APOA1/APOA2/APOC1/AGT/APOC3
BP	GO:0035376	sterol import	3/228	10/18670	0.000202454	0.00274992	0.00216635	335/336/345	3	APOA1/APOA2/APOC3
BP	GO:0070508	cholesterol import	3/228	10/18670	0.000202454	0.00274992	0.00216635	335/336/345	3	APOA1/APOA2/APOC3
BP	GO:0097278	complement-dependent cytotoxicity	3/228	10/18670	0.000202454	0.00274992	0.00216635	3075/922/718	3	CFH/CD5L/C3
BP	GO:0051222	positive regulation of protein transport	15/228	418/18670	0.000202979	0.00274992	0.00216635	2822/2316/2243/5950/5004/6288/929/2597/2244/727/5005/80184/7273/3556/2266	15	GPLD1/FLNA/FGA/RBP4/ORM1/SAA1/CD14/GAPDH/FGB/C5/ORM2/CEP290/TTN/IL1RAP/FGG
BP	GO:0042742	defense response to bacterium	13/228	330/18670	0.000220612	0.00297587	0.00234435	2220/114770/4153/2147/2243/5199/4069/2244/3240/3929/820/5473/100423062	13	FCN2/PGLYRP2/MBL2/F2/FGA/CFP/LYZ/FGB/HP/LBP/CAMP/PPBP/IGLL5
BP	GO:0007162	negative regulation of cell adhesion	12/228	289/18670	0.000238252	0.00319997	0.00252088	3827/5788/5340/2192/7001/445/335/3273/9370/347/7045/2266	12	KNG1/PTPRC/PLG/FBLN1/PRDX2/ASS1/APOA1/HRG/ADIPOQ/APOD/TGFBI/FGG
BP	GO:0019318	hexose metabolic process	11/228	249/18670	0.00025487	0.00340848	0.00268515	2822/4485/5950/2023/3486/3481/2597/9370/10447/23324/347	11	GPLD1/MST1/RBP4/ENO1/IGFBP3/IGF2/GAPDH/ADIPOQ/FAM3C/MAN2B2/APOD
BP	GO:0006006	glucose metabolic process	10/228	209/18670	0.00025745	0.00342826	0.00270073	2822/4485/5950/2023/3486/3481/2597/9370/10447/347	10	GPLD1/MST1/RBP4/ENO1/IGFBP3/IGF2/GAPDH/ADIPOQ/FAM3C/APOD
BP	GO:0051047	positive regulation of secretion	15/228	428/18670	0.000261491	0.00346726	0.00273145	2822/1361/2243/5950/5004/6288/929/2597/2244/727/5005/7273/183/3556/2266	15	GPLD1/CPB2/FGA/RBP4/ORM1/SAA1/CD14/GAPDH/FGB/C5/ORM2/TTN/AGT/IL1RAP/FGG
BP	GO:0061844	antimicrobial humoral immune response mediated by antimicrobial peptide	6/228	73/18670	0.00026724	0.0035168	0.00277048	2147/5196/2597/3273/820/5473	6	F2/PF4/GAPDH/HRG/CAMP/PPBP
BP	GO:0050707	regulation of cytokine secretion	10/228	210/18670	0.000267484	0.0035168	0.00277048	5004/6288/929/2597/335/336/727/5005/3556/2335	10	ORM1/SAA1/CD14/GAPDH/APOA1/APOA2/C5/ORM2/IL1RAP/FN1
BP	GO:0042737	drug catabolic process	8/228	140/18670	0.000328115	0.00429582	0.00338418	3043/1369/3045/7001/3039/2878/1621/3240	8	HBB/CPN1/HBD/PRDX2/HBA1/GPX3/DBH/HP
BP	GO:0042310	vasoconstriction	6/228	76/18670	0.000332942	0.00434079	0.0034196	2243/1311/2244/1621/183/2266	6	FGA/COMP/FGB/DBH/AGT/FGG
BP	GO:0010896	regulation of triglyceride catabolic process	3/228	12/18670	0.000364514	0.00471298	0.00371281	2822/344/345	3	GPLD1/APOC2/APOC3
BP	GO:0090209	negative regulation of triglyceride metabolic process	3/228	12/18670	0.000364514	0.00471298	0.00371281	348/2822/345	3	APOE/GPLD1/APOC3
BP	GO:0048260	positive regulation of receptor-mediated endocytosis	5/228	51/18670	0.000386493	0.0049765	0.00392041	7018/567/718/1191/7448	5	TF/B2M/C3/CLU/VTN
BP	GO:0032372	negative regulation of sterol transport	4/228	29/18670	0.000404782	0.00514816	0.00405564	344/336/341/345	4	APOC2/APOA2/APOC1/APOC3
BP	GO:0032375	negative regulation of cholesterol transport	4/228	29/18670	0.000404782	0.00514816	0.00405564	344/336/341/345	4	APOC2/APOA2/APOC1/APOC3
BP	GO:0048261	negative regulation of receptor-mediated endocytosis	4/228	29/18670	0.000404782	0.00514816	0.00405564	344/341/6457/345	4	APOC2/APOC1/SH3GL3/APOC3
BP	GO:0007160	cell-matrix adhesion	10/228	225/18670	0.000461967	0.00585158	0.00460978	2243/10894/2244/7448/3273/7414/347/2266/3611/2335	10	FGA/LYVE1/FGB/VTN/HRG/VCL/APOD/FGG/ILK/FN1
BP	GO:0032488	Cdc42 protein signal transduction	3/228	13/18670	0.000469607	0.00592427	0.00466705	348/335/345	3	APOE/APOA1/APOC3
BP	GO:0001894	tissue homeostasis	10/228	227/18670	0.000495081	0.00622046	0.00490038	7018/567/7037/5950/27031/213/4069/5284/563/12	10	TF/B2M/TFRC/RBP4/NPHP3/ALB/LYZ/PIGR/AZGP1/SERPINA3
BP	GO:0050994	regulation of lipid catabolic process	5/228	54/18670	0.000505127	0.0063119	0.00497242	2822/344/336/341/345	5	GPLD1/APOC2/APOA2/APOC1/APOC3
BP	GO:0006936	muscle contraction	13/228	360/18670	0.00050641	0.0063119	0.00497242	58/2316/1311/2023/4606/7094/1832/6262/7414/7171/7273/183/4625	13	ACTA1/FLNA/COMP/ENO1/MYBPC2/TLN1/DSP/RYR2/VCL/TPM4/TTN/AGT/MYH7
BP	GO:1904951	positive regulation of establishment of protein localization	15/228	456/18670	0.00050875	0.00631579	0.00497548	2822/2316/2243/5950/5004/6288/929/2597/2244/727/5005/80184/7273/3556/2266	15	GPLD1/FLNA/FGA/RBP4/ORM1/SAA1/CD14/GAPDH/FGB/C5/ORM2/CEP290/TTN/IL1RAP/FGG
BP	GO:0050777	negative regulation of immune response	8/228	150/18670	0.000520749	0.0064391	0.00507263	5788/114770/2/722/335/336/710/725	8	PTPRC/PGLYRP2/A2M/C4BPA/APOA1/APOA2/SERPING1/C4BPB
BP	GO:0010543	regulation of platelet activation	4/228	31/18670	0.000526099	0.00647954	0.00510448	348/2147/3273/2266	4	APOE/F2/HRG/FGG
BP	GO:0019216	regulation of lipid metabolic process	14/228	410/18670	0.000541248	0.00663987	0.00523079	348/2822/2147/718/344/335/336/9370/341/347/183/12/345/338	14	APOE/GPLD1/F2/C3/APOC2/APOA1/APOA2/ADIPOQ/APOC1/APOD/AGT/SERPINA3/APOC3/APOB
BP	GO:0097756	negative regulation of blood vessel diameter	6/228	84/18670	0.000570959	0.0069769	0.00549629	2243/1311/2244/1621/183/2266	6	FGA/COMP/FGB/DBH/AGT/FGG
BP	GO:0030240	skeletal muscle thin filament assembly	3/228	14/18670	0.00059231	0.00719266	0.00566627	58/4606/7273	3	ACTA1/MYBPC2/TTN
BP	GO:0046486	glycerolipid metabolic process	14/228	414/18670	0.000595377	0.00719266	0.00566627	348/2822/5444/56623/718/350/1071/344/335/336/3931/341/345/338	14	APOE/GPLD1/PON1/INPP5E/C3/APOH/CETP/APOC2/APOA1/APOA2/LCAT/APOC1/APOC3/APOB
BP	GO:0045907	positive regulation of vasoconstriction	4/228	32/18670	0.000595541	0.00719266	0.00566627	2243/2244/1621/2266	4	FGA/FGB/DBH/FGG
BP	GO:0003012	muscle system process	15/228	465/18670	0.000622145	0.00748496	0.00589654	58/2316/221476/1311/2023/4606/7094/2934/1832/6262/7414/7171/7273/183/4625	15	ACTA1/FLNA/PI16/COMP/ENO1/MYBPC2/TLN1/GSN/DSP/RYR2/VCL/TPM4/TTN/AGT/MYH7
BP	GO:0032103	positive regulation of response to external stimulus	12/228	323/18670	0.000646038	0.00772118	0.00608263	1361/5340/3818/2147/2161/718/350/5345/3273/3929/2155/183	12	CPB2/PLG/KLKB1/F2/F12/C3/APOH/SERPINF2/HRG/LBP/F7/AGT
BP	GO:2001236	regulation of extrinsic apoptotic signaling pathway	8/228	155/18670	0.000646736	0.00772118	0.00608263	5788/7001/5196/2243/2244/1621/183/2266	8	PTPRC/PRDX2/PF4/FGA/FGB/DBH/AGT/FGG
BP	GO:0019229	regulation of vasoconstriction	5/228	58/18670	0.000703526	0.00836712	0.00659149	2243/2244/1621/183/2266	5	FGA/FGB/DBH/AGT/FGG
BP	GO:0015671	oxygen transport	3/228	15/18670	0.000733736	0.00866031	0.00682246	3043/3045/3039	3	HBB/HBD/HBA1
BP	GO:0071801	regulation of podosome assembly	3/228	15/18670	0.000733736	0.00866031	0.00682246	4478/2934/3936	3	MSN/GSN/LCP1
BP	GO:0031099	regeneration	9/228	198/18670	0.000753398	0.00879391	0.00692771	1361/3482/2934/3936/335/336/7448/347/2155	9	CPB2/IGF2R/GSN/LCP1/APOA1/APOA2/VTN/APOD/F7
BP	GO:0046890	regulation of lipid biosynthetic process	9/228	198/18670	0.000753398	0.00879391	0.00692771	348/2822/718/344/335/9370/341/345/338	9	APOE/GPLD1/C3/APOC2/APOA1/ADIPOQ/APOC1/APOC3/APOB
BP	GO:0010984	regulation of lipoprotein particle clearance	4/228	34/18670	0.000753522	0.00879391	0.00692771	2822/344/341/345	4	GPLD1/APOC2/APOC1/APOC3
BP	GO:0072593	reactive oxygen species metabolic process	11/228	284/18670	0.000768611	0.00893654	0.00704007	3043/5446/3045/2147/7001/3039/445/1191/2878/3240/183	11	HBB/PON3/HBD/F2/PRDX2/HBA1/ASS1/CLU/GPX3/HP/AGT
BP	GO:0006094	gluconeogenesis	6/228	89/18670	0.000776072	0.00898974	0.00708198	4485/5950/2023/2597/9370/10447	6	MST1/RBP4/ENO1/GAPDH/ADIPOQ/FAM3C
BP	GO:0051235	maintenance of location	12/228	330/18670	0.000779124	0.00899167	0.0070835	348/5788/2147/2316/718/213/7094/2934/335/6262/346/338	12	APOE/PTPRC/F2/FLNA/C3/ALB/TLN1/GSN/APOA1/RYR2/APOC4/APOB
BP	GO:0002062	chondrocyte differentiation	7/228	123/18670	0.000791314	0.00909865	0.00716778	2822/4153/1311/2202/1293/1893/7045	7	GPLD1/MBL2/COMP/EFEMP1/COL6A3/ECM1/TGFBI
BP	GO:0032680	regulation of tumor necrosis factor production	8/228	160/18670	0.000796252	0.00912177	0.00718599	5788/5196/5004/929/1191/5005/9370/3929	8	PTPRC/PF4/ORM1/CD14/CLU/ORM2/ADIPOQ/LBP
BP	GO:0014866	skeletal myofibril assembly	3/228	16/18670	0.000894952	0.0101077	0.00796267	58/4606/7273	3	ACTA1/MYBPC2/TTN
BP	GO:0034116	positive regulation of heterotypic cell-cell adhesion	3/228	16/18670	0.000894952	0.0101077	0.00796267	2243/2244/2266	3	FGA/FGB/FGG
BP	GO:0070293	renal absorption	3/228	16/18670	0.000894952	0.0101077	0.00796267	3043/2934/9370	3	HBB/GSN/ADIPOQ
BP	GO:0032640	tumor necrosis factor production	8/228	163/18670	0.000898532	0.0101077	0.00796267	5788/5196/5004/929/1191/5005/9370/3929	8	PTPRC/PF4/ORM1/CD14/CLU/ORM2/ADIPOQ/LBP
BP	GO:1903555	regulation of tumor necrosis factor superfamily cytokine production	8/228	163/18670	0.000898532	0.0101077	0.00796267	5788/5196/5004/929/1191/5005/9370/3929	8	PTPRC/PF4/ORM1/CD14/CLU/ORM2/ADIPOQ/LBP
BP	GO:0019319	hexose biosynthetic process	6/228	92/18670	0.000923927	0.010356	0.00815826	4485/5950/2023/2597/9370/10447	6	MST1/RBP4/ENO1/GAPDH/ADIPOQ/FAM3C
BP	GO:0097237	cellular response to toxic substance	10/228	247/18670	0.000948605	0.0105945	0.00834615	3043/348/567/55937/3045/7001/3039/213/2878/3240	10	HBB/APOE/B2M/APOM/HBD/PRDX2/HBA1/ALB/GPX3/HP
BP	GO:0097164	ammonium ion metabolic process	9/228	205/18670	0.000963425	0.0106883	0.00842009	2822/5444/590/1071/335/336/1621/3931/341	9	GPLD1/PON1/BCHE/CETP/APOA1/APOA2/DBH/LCAT/APOC1
BP	GO:0005996	monosaccharide metabolic process	11/228	292/18670	0.000963869	0.0106883	0.00842009	2822/4485/5950/2023/3486/3481/2597/9370/10447/23324/347	11	GPLD1/MST1/RBP4/ENO1/IGFBP3/IGF2/GAPDH/ADIPOQ/FAM3C/MAN2B2/APOD
BP	GO:0002714	positive regulation of B cell mediated immunity	4/228	37/18670	0.00104285	0.0114824	0.00904562	5788/7037/718/3263	4	PTPRC/TFRC/C3/HPX
BP	GO:0002891	positive regulation of immunoglobulin mediated immune response	4/228	37/18670	0.00104285	0.0114824	0.00904562	5788/7037/718/3263	4	PTPRC/TFRC/C3/HPX
BP	GO:0010744	positive regulation of macrophage derived foam cell differentiation	3/228	17/18670	0.00107698	0.0117749	0.00927612	5196/183/338	3	PF4/AGT/APOB
BP	GO:0045721	negative regulation of gluconeogenesis	3/228	17/18670	0.00107698	0.0117749	0.00927612	4485/9370/10447	3	MST1/ADIPOQ/FAM3C
BP	GO:0071706	tumor necrosis factor superfamily cytokine production	8/228	168/18670	0.00109221	0.0118997	0.00937443	5788/5196/5004/929/1191/5005/9370/3929	8	PTPRC/PF4/ORM1/CD14/CLU/ORM2/ADIPOQ/LBP
BP	GO:0051216	cartilage development	9/228	209/18670	0.00110332	0.0119789	0.0094368	2822/4153/1311/2202/4060/4256/1293/1893/7045	9	GPLD1/MBL2/COMP/EFEMP1/LUM/MGP/COL6A3/ECM1/TGFBI
BP	GO:0046364	monosaccharide biosynthetic process	6/228	98/18670	0.00128388	0.0138908	0.010943	4485/5950/2023/2597/9370/10447	6	MST1/RBP4/ENO1/GAPDH/ADIPOQ/FAM3C
BP	GO:0048747	muscle fiber development	5/228	67/18670	0.00135693	0.0146304	0.0115256	58/1311/4606/10939/7273	5	ACTA1/COMP/MYBPC2/AFG3L2/TTN
BP	GO:0022407	regulation of cell-cell adhesion	13/228	403/18670	0.00142132	0.0152719	0.0120309	5788/5340/7037/7001/2243/445/83706/3481/5345/335/2244/9370/2266	13	PTPRC/PLG/TFRC/PRDX2/FGA/ASS1/FERMT3/IGF2/SERPINF2/APOA1/FGB/ADIPOQ/FGG
BP	GO:0019915	lipid storage	5/228	68/18670	0.00145028	0.0154762	0.012192	348/718/335/346/338	5	APOE/C3/APOA1/APOC4/APOB
BP	GO:0045806	negative regulation of endocytosis	5/228	68/18670	0.00145028	0.0154762	0.012192	344/9370/341/6457/345	5	APOC2/ADIPOQ/APOC1/SH3GL3/APOC3
BP	GO:0050830	defense response to Gram-positive bacterium	6/228	101/18670	0.00149979	0.0157082	0.0123747	2220/114770/4153/4069/3929/820	6	FCN2/PGLYRP2/MBL2/LYZ/LBP/CAMP
BP	GO:0010544	negative regulation of platelet activation	3/228	19/18670	0.0015073	0.0157082	0.0123747	348/2147/2266	3	APOE/F2/FGG
BP	GO:0010985	negative regulation of lipoprotein particle clearance	3/228	19/18670	0.0015073	0.0157082	0.0123747	344/341/345	3	APOC2/APOC1/APOC3
BP	GO:0015669	gas transport	3/228	19/18670	0.0015073	0.0157082	0.0123747	3043/3045/3039	3	HBB/HBD/HBA1
BP	GO:0046597	negative regulation of viral entry into host cell	3/228	19/18670	0.0015073	0.0157082	0.0123747	325/2934/8547	3	APCS/GSN/FCN3
BP	GO:0071800	podosome assembly	3/228	19/18670	0.0015073	0.0157082	0.0123747	4478/2934/3936	3	MSN/GSN/LCP1
BP	GO:0098581	detection of external biotic stimulus	3/228	19/18670	0.0015073	0.0157082	0.0123747	114770/3929/721	3	PGLYRP2/LBP/C4B
BP	GO:0055008	cardiac muscle tissue morphogenesis	5/228	69/18670	0.00154827	0.0160814	0.0126687	4606/1832/6262/7273/4625	5	MYBPC2/DSP/RYR2/TTN/MYH7
BP	GO:0050821	protein stabilization	8/228	178/18670	0.00157922	0.0163484	0.012879	1370/173/2316/5216/2597/1191/335/336	8	CPN2/AFM/FLNA/PFN1/GAPDH/CLU/APOA1/APOA2
BP	GO:0002700	regulation of production of molecular mediator of immune response	7/228	139/18670	0.00161376	0.0165957	0.0130738	5788/567/7037/5950/335/336/3263	7	PTPRC/B2M/TFRC/RBP4/APOA1/APOA2/HPX
BP	GO:0050715	positive regulation of cytokine secretion	7/228	139/18670	0.00161376	0.0165957	0.0130738	5004/6288/929/2597/727/5005/3556	7	ORM1/SAA1/CD14/GAPDH/C5/ORM2/IL1RAP
BP	GO:0007229	integrin-mediated signaling pathway	6/228	103/18670	0.00165839	0.0169985	0.0133912	4627/2316/83706/7094/335/3611	6	MYH9/FLNA/FERMT3/TLN1/APOA1/ILK
BP	GO:0002639	positive regulation of immunoglobulin production	4/228	42/18670	0.00168522	0.0172168	0.0135632	5788/7037/5950/3263	4	PTPRC/TFRC/RBP4/HPX
BP	GO:0045429	positive regulation of nitric oxide biosynthetic process	4/228	43/18670	0.00184048	0.0186805	0.0147162	3043/445/1191/183	4	HBB/ASS1/CLU/AGT
BP	GO:0051293	establishment of spindle localization	4/228	43/18670	0.00184048	0.0186805	0.0147162	4627/4134/1778/55755	4	MYH9/MAP4/DYNC1H1/CDK5RAP2
BP	GO:1903524	positive regulation of blood circulation	5/228	73/18670	0.00198946	0.0201272	0.0158559	2243/6262/2244/1621/2266	5	FGA/RYR2/FGB/DBH/FGG
BP	GO:0003416	endochondral bone growth	4/228	44/18670	0.00200537	0.0201572	0.0158796	4153/1311/1293/1893	4	MBL2/COMP/COL6A3/ECM1
BP	GO:1904407	positive regulation of nitric oxide metabolic process	4/228	44/18670	0.00200537	0.0201572	0.0158796	3043/445/1191/183	4	HBB/ASS1/CLU/AGT
BP	GO:0062014	negative regulation of small molecule metabolic process	6/228	107/18670	0.00201351	0.0201739	0.0158927	348/4485/9370/341/10447/345	6	APOE/MST1/ADIPOQ/APOC1/FAM3C/APOC3
BP	GO:0002822	regulation of adaptive immune response based on somatic recombination of immune receptors built from immunoglobulin superfamily domains	7/228	145/18670	0.00205352	0.0205088	0.0161566	5788/567/7037/718/722/725/3263	7	PTPRC/B2M/TFRC/C3/C4BPA/C4BPB/HPX
BP	GO:0032677	regulation of interleukin-8 production	5/228	74/18670	0.00211277	0.0210332	0.0165696	5788/929/336/9370/3929	5	PTPRC/CD14/APOA2/ADIPOQ/LBP
BP	GO:0001974	blood vessel remodeling	4/228	45/18670	0.00218021	0.0216354	0.0170441	1621/3273/1471/183	4	DBH/HRG/CST3/AGT
BP	GO:0010884	positive regulation of lipid storage	3/228	22/18670	0.00233175	0.0229203	0.0180562	718/346/338	3	C3/APOC4/APOB
BP	GO:0033622	integrin activation	3/228	22/18670	0.00233175	0.0229203	0.0180562	83706/7094/2335	3	FERMT3/TLN1/FN1
BP	GO:0045649	regulation of macrophage differentiation	3/228	22/18670	0.00233175	0.0229203	0.0180562	5196/9370/714	3	PF4/ADIPOQ/C1QC
BP	GO:0032369	negative regulation of lipid transport	4/228	46/18670	0.00236528	0.0231768	0.0182583	344/336/341/345	4	APOC2/APOA2/APOC1/APOC3
BP	GO:0002706	regulation of lymphocyte mediated immunity	7/228	149/18670	0.00239463	0.0233908	0.0184269	5788/567/7037/718/722/725/3263	7	PTPRC/B2M/TFRC/C3/C4BPA/C4BPB/HPX
BP	GO:0015711	organic anion transport	14/228	482/18670	0.00249849	0.0243291	0.0191661	3043/348/6342/3039/1071/5360/344/335/336/23200/341/759/183/345	14	HBB/APOE/SCP2/HBA1/CETP/PLTP/APOC2/APOA1/APOA2/ATP11B/APOC1/CA1/AGT/APOC3
BP	GO:1903510	mucopolysaccharide metabolic process	6/228	112/18670	0.00253491	0.0246068	0.0193849	3700/3699/10894/4060/3698/3697	6	ITIH4/ITIH3/LYVE1/LUM/ITIH2/ITIH1
BP	GO:0098868	bone growth	4/228	47/18670	0.00256088	0.0247817	0.0195226	4153/1311/1293/1893	4	MBL2/COMP/COL6A3/ECM1
BP	GO:0022604	regulation of cell morphogenesis	14/228	484/18670	0.00259379	0.0250224	0.0197123	348/4478/4627/832/2147/2192/2316/2243/335/2244/2266/3611/10439/2335	14	APOE/MSN/MYH9/CAPZB/F2/FBLN1/FLNA/FGA/APOA1/FGB/FGG/ILK/OLFM1/FN1
BP	GO:0009595	detection of biotic stimulus	3/228	23/18670	0.00265753	0.025515	0.0201003	114770/3929/721	3	PGLYRP2/LBP/C4B
BP	GO:0031647	regulation of protein stability	10/228	284/18670	0.00266122	0.025515	0.0201003	7018/1370/173/2316/5216/2597/2934/1191/335/336	10	TF/CPN2/AFM/FLNA/PFN1/GAPDH/GSN/CLU/APOA1/APOA2
BP	GO:0016042	lipid catabolic process	11/228	333/18670	0.00271611	0.0258821	0.0203895	348/2822/10449/6342/344/335/336/9370/341/345/338	11	APOE/GPLD1/ACAA2/SCP2/APOC2/APOA1/APOA2/ADIPOQ/APOC1/APOC3/APOB
BP	GO:0048732	gland development	13/228	434/18670	0.00271612	0.0258821	0.0203895	4478/1361/462/4485/3482/7001/445/27031/3481/335/7448/5176/5104	13	MSN/CPB2/SERPINC1/MST1/IGF2R/PRDX2/ASS1/NPHP3/IGF2/APOA1/VTN/SERPINF1/SERPINA5
BP	GO:0002063	chondrocyte development	4/228	48/18670	0.0027673	0.0262095	0.0206474	4153/1311/1293/1893	4	MBL2/COMP/COL6A3/ECM1
BP	GO:0051653	spindle localization	4/228	48/18670	0.0027673	0.0262095	0.0206474	4627/4134/1778/55755	4	MYH9/MAP4/DYNC1H1/CDK5RAP2
BP	GO:2000377	regulation of reactive oxygen species metabolic process	8/228	195/18670	0.00278762	0.0263218	0.0207359	3043/5446/2147/7001/445/1191/3240/183	8	HBB/PON3/F2/PRDX2/ASS1/CLU/HP/AGT
BP	GO:0055072	iron ion homeostasis	5/228	79/18670	0.00281435	0.026494	0.0208716	7018/567/7037/1356/3263	5	TF/B2M/TFRC/CP/HPX
BP	GO:0010770	positive regulation of cell morphogenesis involved in differentiation	7/228	154/18670	0.00288061	0.0270361	0.0212986	2316/2243/335/2244/2266/3611/2335	7	FLNA/FGA/APOA1/FGB/FGG/ILK/FN1
BP	GO:0022617	extracellular matrix disassembly	5/228	80/18670	0.00297267	0.0278163	0.0219133	5340/3818/2/3936/1471	5	PLG/KLKB1/A2M/LCP1/CST3
BP	GO:0032757	positive regulation of interleukin-8 production	4/228	49/18670	0.00298484	0.0278466	0.0219371	929/336/9370/3929	4	CD14/APOA2/ADIPOQ/LBP
BP	GO:0010640	regulation of platelet-derived growth factor receptor signaling pathway	3/228	24/18670	0.00301004	0.0279979	0.0220563	9370/347/2155	3	ADIPOQ/APOD/F7
BP	GO:0010906	regulation of glucose metabolic process	6/228	117/18670	0.00315177	0.0292289	0.0230261	2822/4485/3486/3481/9370/10447	6	GPLD1/MST1/IGFBP3/IGF2/ADIPOQ/FAM3C
BP	GO:0032637	interleukin-8 production	5/228	82/18670	0.00330846	0.0305005	0.0240278	5788/929/336/9370/3929	5	PTPRC/CD14/APOA2/ADIPOQ/LBP
BP	GO:0060415	muscle tissue morphogenesis	5/228	82/18670	0.00330846	0.0305005	0.0240278	4606/1832/6262/7273/4625	5	MYBPC2/DSP/RYR2/TTN/MYH7
BP	GO:0002819	regulation of adaptive immune response	7/228	160/18670	0.00355975	0.0326241	0.0257008	5788/567/7037/718/722/725/3263	7	PTPRC/B2M/TFRC/C3/C4BPA/C4BPB/HPX
BP	GO:0030203	glycosaminoglycan metabolic process	7/228	160/18670	0.00355975	0.0326241	0.0257008	114770/3700/3699/10894/4060/3698/3697	7	PGLYRP2/ITIH4/ITIH3/LYVE1/LUM/ITIH2/ITIH1
BP	GO:0003014	renal system process	6/228	120/18670	0.00357195	0.0326399	0.0257132	3043/4162/2934/5345/9370/183	6	HBB/MCAM/GSN/SERPINF2/ADIPOQ/AGT
BP	GO:1902905	positive regulation of supramolecular fiber organization	8/228	204/18670	0.00366884	0.0333468	0.0262701	348/2316/5216/2934/5345/1191/335/55755	8	APOE/FLNA/PFN1/GSN/SERPINF2/CLU/APOA1/CDK5RAP2
BP	GO:0014910	regulation of smooth muscle cell migration	5/228	84/18670	0.00367072	0.0333468	0.0262701	3486/7448/9370/183/3611	5	IGFBP3/VTN/ADIPOQ/AGT/ILK
BP	GO:2000146	negative regulation of cell motility	11/228	349/18670	0.00387506	0.0351009	0.0276519	348/2192/350/3486/727/3273/9370/7414/347/5176/3611	11	APOE/FBLN1/APOH/IGFBP3/C5/HRG/ADIPOQ/VCL/APOD/SERPINF1/ILK
BP	GO:0050704	regulation of interleukin-1 secretion	4/228	53/18670	0.0039718	0.0358729	0.0282601	5004/6288/335/5005	4	ORM1/SAA1/APOA1/ORM2
BP	GO:0010769	regulation of cell morphogenesis involved in differentiation	10/228	301/18670	0.00401966	0.0362002	0.0285179	348/2192/2316/2243/335/2244/2266/3611/10439/2335	10	APOE/FBLN1/FLNA/FGA/APOA1/FGB/FGG/ILK/OLFM1/FN1
BP	GO:0019218	regulation of steroid metabolic process	6/228	124/18670	0.00419524	0.0376725	0.0296778	348/335/336/341/183/338	6	APOE/APOA1/APOA2/APOC1/AGT/APOB
BP	GO:0060326	cell chemotaxis	10/228	304/18670	0.00430803	0.0385742	0.0303882	6289/4485/6291/5196/6288/727/3273/3929/5473/2155	10	SAA2/MST1/SAA4/PF4/SAA1/C5/HRG/LBP/PPBP/F7
BP	GO:2001233	regulation of apoptotic signaling pathway	12/228	406/18670	0.00434919	0.0387841	0.0305535	5788/10449/7001/5196/2243/2023/2934/1191/2244/1621/183/2266	12	PTPRC/ACAA2/PRDX2/PF4/FGA/ENO1/GSN/CLU/FGB/DBH/AGT/FGG
BP	GO:0062012	regulation of small molecule metabolic process	13/228	459/18670	0.00435637	0.0387841	0.0305535	348/2822/23165/4485/2023/3486/3481/344/9370/341/10447/345/338	13	APOE/GPLD1/NUP205/MST1/ENO1/IGFBP3/IGF2/APOC2/ADIPOQ/APOC1/FAM3C/APOC3/APOB
BP	GO:0048644	muscle organ morphogenesis	5/228	88/18670	0.00447918	0.0396509	0.0312364	4606/1832/6262/7273/4625	5	MYBPC2/DSP/RYR2/TTN/MYH7
BP	GO:0050829	defense response to Gram-negative bacterium	5/228	88/18670	0.00447918	0.0396509	0.0312364	2220/2147/4069/3929/820	5	FCN2/F2/LYZ/LBP/CAMP
BP	GO:0042304	regulation of fatty acid biosynthetic process	4/228	55/18670	0.00453925	0.0399557	0.0314765	344/9370/341/345	4	APOC2/ADIPOQ/APOC1/APOC3
BP	GO:0043113	receptor clustering	4/228	55/18670	0.00453925	0.0399557	0.0314765	348/2316/2934/5284	4	APOE/FLNA/GSN/PIGR
BP	GO:0003007	heart morphogenesis	9/228	259/18670	0.0046744	0.0410294	0.0323223	5950/27031/4606/1832/6262/7273/3611/10439/4625	9	RBP4/NPHP3/MYBPC2/DSP/RYR2/TTN/ILK/OLFM1/MYH7
BP	GO:0006022	aminoglycan metabolic process	7/228	170/18670	0.00495441	0.043365	0.0341623	114770/3700/3699/10894/4060/3698/3697	7	PGLYRP2/ITIH4/ITIH3/LYVE1/LUM/ITIH2/ITIH1
BP	GO:1903428	positive regulation of reactive oxygen species biosynthetic process	4/228	57/18670	0.00515887	0.0448166	0.0353058	3043/445/1191/183	4	HBB/ASS1/CLU/AGT
BP	GO:0002699	positive regulation of immune effector process	8/228	216/18670	0.00516265	0.0448166	0.0353058	5788/567/7037/718/5950/729/3929/3263	8	PTPRC/B2M/TFRC/C3/RBP4/C6/LBP/HPX
BP	GO:0014909	smooth muscle cell migration	5/228	91/18670	0.0051634	0.0448166	0.0353058	3486/7448/9370/183/3611	5	IGFBP3/VTN/ADIPOQ/AGT/ILK
BP	GO:0044788	modulation by host of viral process	3/228	29/18670	0.00519608	0.0448503	0.0353324	348/325/3482	3	APOE/APCS/IGF2R
BP	GO:0120033	negative regulation of plasma membrane bounded cell projection assembly	3/228	29/18670	0.00519608	0.0448503	0.0353324	832/4134/3273	3	CAPZB/MAP4/HRG
BP	GO:0055002	striated muscle cell development	7/228	173/18670	0.00544366	0.0468576	0.0369137	58/221476/1311/4606/10939/7273/183	7	ACTA1/PI16/COMP/MYBPC2/AFG3L2/TTN/AGT
BP	GO:0007584	response to nutrient	8/228	219/18670	0.00560004	0.0480708	0.0378695	462/717/590/445/2934/335/9370/2155	8	SERPINC1/C2/BCHE/ASS1/GSN/APOA1/ADIPOQ/F7
BP	GO:0046596	regulation of viral entry into host cell	3/228	30/18670	0.00572202	0.0489348	0.0385501	325/2934/8547	3	APCS/GSN/FCN3
BP	GO:0048193	Golgi vesicle transport	11/228	368/18670	0.00573209	0.0489348	0.0385501	832/2147/2153/2159/5265/2158/5627/8858/1778/5624/2155	11	CAPZB/F2/F5/F10/SERPINA1/F9/PROS1/PROZ/DYNC1H1/PROC/F7
BP	GO:0070371	ERK1 and ERK2 cascade	10/228	317/18670	0.00575161	0.0489673	0.0385757	348/5788/2192/2243/5345/2244/9370/183/2266/2335	10	APOE/PTPRC/FBLN1/FGA/SERPINF2/FGB/ADIPOQ/AGT/FGG/FN1
CC	GO:0072562	blood microparticle	67/228	147/19717	1.32091e-92	3.94952e-90	2.98943e-90	58/3043/3078/3827/348/7018/1370/4478/173/2220/5340/715/462/2/3045/7037/733/716/5444/2147/731/3075/8542/325/3700/922/718/2243/197/590/5216/720/3039/5004/722/213/2638/3959/3250/629/2934/735/5345/1191/335/336/2244/7448/5627/3698/5005/3240/3273/1356/1/710/8547/713/714/3263/183/721/3697/2162/12/2266/2335	67	ACTA1/HBB/CFHR1/KNG1/APOE/TF/CPN2/MSN/AFM/FCN2/PLG/C1R/SERPINC1/A2M/HBD/TFRC/C8G/C1S/PON1/F2/C8A/CFH/APOL1/APCS/ITIH4/CD5L/C3/FGA/AHSG/BCHE/PFN1/C4A/HBA1/ORM1/C4BPA/ALB/GC/LGALS3BP/HPR/CFB/GSN/C9/SERPINF2/CLU/APOA1/APOA2/FGB/VTN/PROS1/ITIH2/ORM2/HP/HRG/CP/A1BG/SERPING1/FCN3/C1QB/C1QC/HPX/AGT/C4B/ITIH1/F13A1/SERPINA3/FGG/FN1
CC	GO:0060205	cytoplasmic vesicle lumen	58/228	338/19717	1.77095e-51	2.11101e-49	1.59784e-49	3043/3827/348/7018/567/5340/2/3700/5196/2153/718/2243/116844/197/5199/3039/3699/350/7276/5004/6288/5267/213/3959/83706/3481/2934/4069/5345/1191/5265/335/2244/7123/5627/22915/1621/5005/3240/3273/1/710/7414/820/1675/1778/10447/80184/5473/3263/7450/1893/10321/2162/12/2266/338/2335	58	HBB/KNG1/APOE/TF/B2M/PLG/A2M/ITIH4/PF4/F5/C3/FGA/LRG1/AHSG/CFP/HBA1/ITIH3/APOH/TTR/ORM1/SAA1/SERPINA4/ALB/LGALS3BP/FERMT3/IGF2/GSN/LYZ/SERPINF2/CLU/SERPINA1/APOA1/FGB/CLEC3B/PROS1/MMRN1/DBH/ORM2/HP/HRG/A1BG/SERPING1/VCL/CAMP/CFD/DYNC1H1/FAM3C/CEP290/PPBP/HPX/VWF/ECM1/CRISP3/F13A1/SERPINA3/FGG/APOB/FN1
CC	GO:0031983	vesicle lumen	58/228	339/19717	2.11807e-51	2.11101e-49	1.59784e-49	3043/3827/348/7018/567/5340/2/3700/5196/2153/718/2243/116844/197/5199/3039/3699/350/7276/5004/6288/5267/213/3959/83706/3481/2934/4069/5345/1191/5265/335/2244/7123/5627/22915/1621/5005/3240/3273/1/710/7414/820/1675/1778/10447/80184/5473/3263/7450/1893/10321/2162/12/2266/338/2335	58	HBB/KNG1/APOE/TF/B2M/PLG/A2M/ITIH4/PF4/F5/C3/FGA/LRG1/AHSG/CFP/HBA1/ITIH3/APOH/TTR/ORM1/SAA1/SERPINA4/ALB/LGALS3BP/FERMT3/IGF2/GSN/LYZ/SERPINF2/CLU/SERPINA1/APOA1/FGB/CLEC3B/PROS1/MMRN1/DBH/ORM2/HP/HRG/A1BG/SERPING1/VCL/CAMP/CFD/DYNC1H1/FAM3C/CEP290/PPBP/HPX/VWF/ECM1/CRISP3/F13A1/SERPINA3/FGG/APOB/FN1
CC	GO:0062023	collagen-containing extracellular matrix	61/228	406/19717	1.34827e-50	1.00783e-48	7.62838e-49	3827/348/5340/462/2/4153/4485/2147/2161/2192/325/3700/5196/4684/2243/197/5199/1311/350/4670/2202/5004/4060/3959/712/4256/5345/1191/5265/335/5118/2158/2244/7448/7123/1293/3698/22915/10216/5005/3273/9370/1/710/713/714/3263/7450/2155/563/1893/183/3697/5176/7045/2162/12/345/2266/2335/5104	61	KNG1/APOE/PLG/SERPINC1/A2M/MBL2/MST1/F2/F12/FBLN1/APCS/ITIH4/PF4/NCAM1/FGA/AHSG/CFP/COMP/APOH/HNRNPM/EFEMP1/ORM1/LUM/LGALS3BP/C1QA/MGP/SERPINF2/CLU/SERPINA1/APOA1/PCOLCE/F9/FGB/VTN/CLEC3B/COL6A3/ITIH2/MMRN1/PRG4/ORM2/HRG/ADIPOQ/A1BG/SERPING1/C1QB/C1QC/HPX/VWF/F7/AZGP1/ECM1/AGT/ITIH1/SERPINF1/TGFBI/F13A1/SERPINA3/APOC3/FGG/FN1/SERPINA5
CC	GO:0034774	secretory granule lumen	52/228	321/19717	1.16285e-44	6.95382e-43	5.26341e-43	3827/7018/567/5340/2/3700/5196/2153/718/2243/116844/197/5199/3699/350/7276/5004/5267/213/3959/83706/3481/2934/4069/5345/1191/5265/335/2244/7123/5627/22915/1621/5005/3240/3273/1/710/7414/820/1675/1778/10447/80184/5473/7450/1893/10321/2162/12/2266/2335	52	KNG1/TF/B2M/PLG/A2M/ITIH4/PF4/F5/C3/FGA/LRG1/AHSG/CFP/ITIH3/APOH/TTR/ORM1/SERPINA4/ALB/LGALS3BP/FERMT3/IGF2/GSN/LYZ/SERPINF2/CLU/SERPINA1/APOA1/FGB/CLEC3B/PROS1/MMRN1/DBH/ORM2/HP/HRG/A1BG/SERPING1/VCL/CAMP/CFD/DYNC1H1/FAM3C/CEP290/PPBP/VWF/ECM1/CRISP3/F13A1/SERPINA3/FGG/FN1
CC	GO:0031093	platelet alpha granule lumen	28/228	67/19717	4.21972e-37	2.10283e-35	1.59165e-35	3827/5340/2/5196/2153/2243/197/5004/213/83706/3481/5345/1191/5265/2244/5627/22915/5005/3273/1/710/1675/5473/7450/2162/12/2266/2335	28	KNG1/PLG/A2M/PF4/F5/FGA/AHSG/ORM1/ALB/FERMT3/IGF2/SERPINF2/CLU/SERPINA1/FGB/PROS1/MMRN1/ORM2/HRG/A1BG/SERPING1/CFD/PPBP/VWF/F13A1/SERPINA3/FGG/FN1
CC	GO:0034364	high-density lipoprotein particle	21/228	26/19717	5.16694e-37	2.20702e-35	1.67052e-35	348/6289/55937/5444/8542/6291/350/1071/6288/3250/5360/344/1191/335/336/3931/346/341/345/338/319	21	APOE/SAA2/APOM/PON1/APOL1/SAA4/APOH/CETP/SAA1/HPR/PLTP/APOC2/CLU/APOA1/APOA2/LCAT/APOC4/APOC1/APOC3/APOB/APOF
CC	GO:0031091	platelet alpha granule	29/228	91/19717	2.83644e-34	1.06012e-32	8.02413e-33	3827/5340/2/5196/2153/2243/197/5004/213/83706/3481/5345/1191/5265/2244/5627/22915/5005/3273/1/710/1675/5473/7450/2162/12/2266/2335/5104	29	KNG1/PLG/A2M/PF4/F5/FGA/AHSG/ORM1/ALB/FERMT3/IGF2/SERPINF2/CLU/SERPINA1/FGB/PROS1/MMRN1/ORM2/HRG/A1BG/SERPING1/CFD/PPBP/VWF/F13A1/SERPINA3/FGG/FN1/SERPINA5
CC	GO:0034358	plasma lipoprotein particle	22/228	37/19717	6.99168e-34	2.09051e-32	1.58233e-32	348/6289/55937/5444/8542/6291/350/1071/6288/3250/5360/344/1191/335/336/3931/346/341/51449/345/338/319	22	APOE/SAA2/APOM/PON1/APOL1/SAA4/APOH/CETP/SAA1/HPR/PLTP/APOC2/CLU/APOA1/APOA2/LCAT/APOC4/APOC1/PCYOX1/APOC3/APOB/APOF
CC	GO:1990777	lipoprotein particle	22/228	37/19717	6.99168e-34	2.09051e-32	1.58233e-32	348/6289/55937/5444/8542/6291/350/1071/6288/3250/5360/344/1191/335/336/3931/346/341/51449/345/338/319	22	APOE/SAA2/APOM/PON1/APOL1/SAA4/APOH/CETP/SAA1/HPR/PLTP/APOC2/CLU/APOA1/APOA2/LCAT/APOC4/APOC1/PCYOX1/APOC3/APOB/APOF
CC	GO:0032994	protein-lipid complex	22/228	39/19717	3.73356e-33	1.01485e-31	7.68148e-32	348/6289/55937/5444/8542/6291/350/1071/6288/3250/5360/344/1191/335/336/3931/346/341/51449/345/338/319	22	APOE/SAA2/APOM/PON1/APOL1/SAA4/APOH/CETP/SAA1/HPR/PLTP/APOC2/CLU/APOA1/APOA2/LCAT/APOC4/APOC1/PCYOX1/APOC3/APOB/APOF
CC	GO:0005788	endoplasmic reticulum lumen	35/228	309/19717	1.39553e-24	3.4772e-23	2.63192e-23	3827/348/7018/567/462/2147/8542/2153/718/2243/197/590/720/5199/3486/2159/213/3053/1191/5265/335/336/2158/7448/1293/3698/8858/1356/1471/5624/2155/2266/338/2335/51156	35	KNG1/APOE/TF/B2M/SERPINC1/F2/APOL1/F5/C3/FGA/AHSG/BCHE/C4A/CFP/IGFBP3/F10/ALB/SERPIND1/CLU/SERPINA1/APOA1/APOA2/F9/VTN/COL6A3/ITIH2/PROZ/CP/CST3/PROC/F7/FGG/APOB/FN1/SERPINA10
CC	GO:0034361	very-low-density lipoprotein particle	12/228	20/19717	4.96171e-19	1.05968e-17	8.02081e-18	348/55937/8542/350/344/335/336/346/341/51449/345/338	12	APOE/APOM/APOL1/APOH/APOC2/APOA1/APOA2/APOC4/APOC1/PCYOX1/APOC3/APOB
CC	GO:0034385	triglyceride-rich plasma lipoprotein particle	12/228	20/19717	4.96171e-19	1.05968e-17	8.02081e-18	348/55937/8542/350/344/335/336/346/341/51449/345/338	12	APOE/APOM/APOL1/APOH/APOC2/APOA1/APOA2/APOC4/APOC1/PCYOX1/APOC3/APOB
CC	GO:0042627	chylomicron	8/228	13/19717	3.46233e-13	6.90158e-12	5.22387e-12	348/350/344/335/336/341/345/338	8	APOE/APOH/APOC2/APOA1/APOA2/APOC1/APOC3/APOB
CC	GO:0031089	platelet dense granule lumen	8/228	14/19717	7.99865e-13	1.49475e-11	1.13139e-11	3700/3699/350/5267/3959/7123/10447/1893	8	ITIH4/ITIH3/APOH/SERPINA4/LGALS3BP/CLEC3B/FAM3C/ECM1
CC	GO:1904724	tertiary granule lumen	11/228	55/19717	2.97167e-11	5.22664e-10	3.95609e-10	3043/567/116844/5199/5004/4069/3240/820/1471/5473/10321	11	HBB/B2M/LRG1/CFP/ORM1/LYZ/HP/CAMP/CST3/PPBP/CRISP3
CC	GO:0071682	endocytic vesicle lumen	8/228	20/19717	3.16055e-11	5.25002e-10	3.97379e-10	3043/348/3039/6288/335/3240/3263/338	8	HBB/APOE/HBA1/SAA1/APOA1/HP/HPX/APOB
CC	GO:0042827	platelet dense granule	8/228	21/19717	5.05489e-11	7.9548e-10	6.02106e-10	3700/3699/350/5267/3959/7123/10447/1893	8	ITIH4/ITIH3/APOH/SERPINA4/LGALS3BP/CLEC3B/FAM3C/ECM1
CC	GO:0035580	specific granule lumen	11/228	62/19717	1.17589e-10	1.75796e-09	1.33061e-09	567/116844/5199/5004/4069/5005/3240/7414/820/80184/10321	11	B2M/LRG1/CFP/ORM1/LYZ/ORM2/HP/VCL/CAMP/CEP290/CRISP3
CC	GO:0046930	pore complex	7/228	23/19717	5.28113e-09	7.51932e-08	5.69144e-08	733/731/729/735/730/727/732	7	C8G/C8A/C6/C9/C7/C5/C8B
CC	GO:0034362	low-density lipoprotein particle	6/228	14/19717	6.22244e-09	8.45686e-08	6.40107e-08	348/55937/344/335/338/319	6	APOE/APOM/APOC2/APOA1/APOB/APOF
CC	GO:0005581	collagen trimer	10/228	87/19717	6.45185e-08	8.3874e-07	6.3485e-07	2220/4153/78989/4060/712/1293/9370/8547/713/714	10	FCN2/MBL2/COLEC11/LUM/C1QA/COL6A3/ADIPOQ/FCN3/C1QB/C1QC
CC	GO:0070820	tertiary granule	12/228	164/19717	4.77599e-07	5.95009e-06	4.50368e-06	3043/567/116844/5199/5004/4069/1832/3240/820/1471/5473/10321	12	HBB/B2M/LRG1/CFP/ORM1/LYZ/DSP/HP/CAMP/CST3/PPBP/CRISP3
CC	GO:0042581	specific granule	11/228	160/19717	2.66253e-06	3.18439e-05	2.41029e-05	567/116844/5199/5004/4069/5005/3240/7414/820/80184/10321	11	B2M/LRG1/CFP/ORM1/LYZ/ORM2/HP/VCL/CAMP/CEP290/CRISP3
CC	GO:0005796	Golgi lumen	9/228	102/19717	2.84641e-06	3.27338e-05	2.47765e-05	2147/2159/4060/2158/7448/5627/8858/5624/2155	9	F2/F10/LUM/F9/VTN/PROS1/PROZ/PROC/F7
CC	GO:0009897	external side of plasma membrane	17/228	393/19717	3.52716e-06	3.906e-05	2.95649e-05	7018/5788/567/5340/7037/2147/4684/2243/4162/2159/929/2811/2244/563/100423062/2266/5104	17	TF/PTPRC/B2M/PLG/TFRC/F2/NCAM1/FGA/MCAM/F10/CD14/GP1BA/FGB/AZGP1/IGLL5/FGG/SERPINA5
CC	GO:0031838	haptoglobin-hemoglobin complex	4/228	11/19717	5.39264e-06	5.75856e-05	4.35871e-05	3043/3045/3039/3240	4	HBB/HBD/HBA1/HP
CC	GO:0002102	podosome	5/228	30/19717	2.22739e-05	0.000229651	0.000173825	83706/2934/3936/7414/7171	5	FERMT3/GSN/LCP1/VCL/TPM4
CC	GO:0005775	vacuolar lumen	10/228	172/19717	3.28313e-05	0.000327218	0.000247675	718/7276/2638/4060/4069/5005/1778/23324/12/338	10	C3/TTR/GC/LUM/LYZ/ORM2/DYNC1H1/MAN2B2/SERPINA3/APOB
CC	GO:0044449	contractile fiber part	11/228	221/19717	5.54703e-05	0.00053502	0.000404961	58/832/2316/2023/4606/6262/7414/7171/7273/3611/4625	11	ACTA1/CAPZB/FLNA/ENO1/MYBPC2/RYR2/VCL/TPM4/TTN/ILK/MYH7
CC	GO:0030016	myofibril	11/228	224/19717	6.26405e-05	0.000585297	0.000443017	58/832/2316/2023/4606/6262/7414/7171/7273/3611/4625	11	ACTA1/CAPZB/FLNA/ENO1/MYBPC2/RYR2/VCL/TPM4/TTN/ILK/MYH7
CC	GO:0043292	contractile fiber	11/228	234/19717	9.2578e-05	0.000838813	0.000634905	58/832/2316/2023/4606/6262/7414/7171/7273/3611/4625	11	ACTA1/CAPZB/FLNA/ENO1/MYBPC2/RYR2/VCL/TPM4/TTN/ILK/MYH7
CC	GO:1904813	ficolin-1-rich granule lumen	8/228	124/19717	9.84938e-05	0.000866166	0.000655609	3043/116844/2934/5265/1/7414/1675/1471	8	HBB/LRG1/GSN/SERPINA1/A1BG/VCL/CFD/CST3
CC	GO:0001725	stress fiber	6/228	67/19717	0.000124024	0.00103009	0.000779683	58/4627/3936/7171/3611/4625	6	ACTA1/MYH9/LCP1/TPM4/ILK/MYH7
CC	GO:0097517	contractile actin filament bundle	6/228	67/19717	0.000124024	0.00103009	0.000779683	58/4627/3936/7171/3611/4625	6	ACTA1/MYH9/LCP1/TPM4/ILK/MYH7
CC	GO:0030017	sarcomere	10/228	204/19717	0.000136958	0.00110677	0.000837725	58/832/2316/2023/4606/6262/7171/7273/3611/4625	10	ACTA1/CAPZB/FLNA/ENO1/MYBPC2/RYR2/TPM4/TTN/ILK/MYH7
CC	GO:0030139	endocytic vesicle	12/228	303/19717	0.000224367	0.00176542	0.00133626	3043/348/7018/567/3482/3039/6288/2934/335/3240/3263/338	12	HBB/APOE/TF/B2M/IGF2R/HBA1/SAA1/GSN/APOA1/HP/HPX/APOB
CC	GO:0032432	actin filament bundle	6/228	75/19717	0.00023176	0.00177683	0.0013449	58/4627/3936/7171/3611/4625	6	ACTA1/MYH9/LCP1/TPM4/ILK/MYH7
CC	GO:0005925	focal adhesion	14/228	405/19717	0.000279279	0.00208761	0.00158013	5788/4478/4627/567/3482/2316/5216/4162/7094/2934/3936/7414/7171/3611	14	PTPRC/MSN/MYH9/B2M/IGF2R/FLNA/PFN1/MCAM/TLN1/GSN/LCP1/VCL/TPM4/ILK
CC	GO:0005924	cell-substrate adherens junction	14/228	408/19717	0.000300909	0.00212131	0.00160564	5788/4478/4627/567/3482/2316/5216/4162/7094/2934/3936/7414/7171/3611	14	PTPRC/MSN/MYH9/B2M/IGF2R/FLNA/PFN1/MCAM/TLN1/GSN/LCP1/VCL/TPM4/ILK
CC	GO:0042641	actomyosin	6/228	79/19717	0.000307899	0.00212131	0.00160564	58/4627/3936/7171/3611/4625	6	ACTA1/MYH9/LCP1/TPM4/ILK/MYH7
CC	GO:0005833	hemoglobin complex	3/228	12/19717	0.000310818	0.00212131	0.00160564	3043/3045/3039	3	HBB/HBD/HBA1
CC	GO:0101002	ficolin-1-rich granule	9/228	185/19717	0.000312166	0.00212131	0.00160564	3043/116844/2934/1832/5265/1/7414/1675/1471	9	HBB/LRG1/GSN/DSP/SERPINA1/A1BG/VCL/CFD/CST3
CC	GO:0030055	cell-substrate junction	14/228	412/19717	0.000331976	0.0022058	0.00166959	5788/4478/4627/567/3482/2316/5216/4162/7094/2934/3936/7414/7171/3611	14	PTPRC/MSN/MYH9/B2M/IGF2R/FLNA/PFN1/MCAM/TLN1/GSN/LCP1/VCL/TPM4/ILK
CC	GO:0005865	striated muscle thin filament	4/228	31/19717	0.000428797	0.00278718	0.00210964	58/4606/7171/7273	4	ACTA1/MYBPC2/TPM4/TTN
CC	GO:0005766	primary lysosome	8/228	155/19717	0.000453406	0.00282434	0.00213777	718/7276/4069/5284/5005/23200/1778/12	8	C3/TTR/LYZ/PIGR/ORM2/ATP11B/DYNC1H1/SERPINA3
CC	GO:0042582	azurophil granule	8/228	155/19717	0.000453406	0.00282434	0.00213777	718/7276/4069/5284/5005/23200/1778/12	8	C3/TTR/LYZ/PIGR/ORM2/ATP11B/DYNC1H1/SERPINA3
CC	GO:0036379	myofilament	4/228	32/19717	0.000485641	0.0029634	0.00224303	58/4606/7171/7273	4	ACTA1/MYBPC2/TPM4/TTN
CC	GO:0035578	azurophil granule lumen	6/228	91/19717	0.000658277	0.0039365	0.00297957	718/7276/4069/5005/1778/12	6	C3/TTR/LYZ/ORM2/DYNC1H1/SERPINA3
CC	GO:0005769	early endosome	12/228	350/19717	0.000812622	0.0047642	0.00360606	348/7018/567/7037/3482/344/335/336/23200/6457/345/338	12	APOE/TF/B2M/TFRC/IGF2R/APOC2/APOA1/APOA2/ATP11B/SH3GL3/APOC3/APOB
CC	GO:0044215	other organism	5/228	77/19717	0.00198897	0.0108606	0.00822046	5340/23165/5196/735/721	5	PLG/NUP205/PF4/C9/C4B
CC	GO:0044216	other organism cell	5/228	77/19717	0.00198897	0.0108606	0.00822046	5340/23165/5196/735/721	5	PLG/NUP205/PF4/C9/C4B
CC	GO:0044217	other organism part	5/228	77/19717	0.00198897	0.0108606	0.00822046	5340/23165/5196/735/721	5	PLG/NUP205/PF4/C9/C4B
CC	GO:0032982	myosin filament	3/228	22/19717	0.00199776	0.0108606	0.00822046	4627/4606/4625	3	MYH9/MYBPC2/MYH7
CC	GO:0031233	intrinsic component of external side of plasma membrane	3/228	24/19717	0.00258135	0.0137826	0.0104321	2159/929/2811	3	F10/CD14/GP1BA
CC	GO:0005938	cell cortex	10/228	308/19717	0.00322881	0.0169371	0.0128198	4627/2316/22844/83992/5216/2023/2934/2244/7171/1778	10	MYH9/FLNA/FRMPD1/CTTNBP2/PFN1/ENO1/GSN/FGB/TPM4/DYNC1H1
CC	GO:0031430	M band	3/228	28/19717	0.0040386	0.0208197	0.0157586	2023/4606/7273	3	ENO1/MYBPC2/TTN
CC	GO:0005604	basement membrane	5/228	95/19717	0.00493558	0.0250125	0.0189322	2192/7448/5176/7045/2335	5	FBLN1/VTN/SERPINF1/TGFBI/FN1
CC	GO:0005916	fascia adherens	2/228	10/19717	0.00563568	0.0280845	0.0212574	1832/7414	2	DSP/VCL
CC	GO:0030135	coated vesicle	9/228	289/19717	0.00665857	0.0326379	0.0247039	348/7018/567/7037/3482/2153/5265/7450/338	9	APOE/TF/B2M/TFRC/IGF2R/F5/SERPINA1/VWF/APOB
CC	GO:0030667	secretory granule membrane	9/228	298/19717	0.00806468	0.0388926	0.0294382	5788/3482/6402/929/5284/1832/1621/23200/5104	9	PTPRC/IGF2R/SELL/CD14/PIGR/DSP/DBH/ATP11B/SERPINA5
CC	GO:0001931	uropod	2/228	13/19717	0.00954812	0.0446076	0.0337639	4478/4627	2	MSN/MYH9
CC	GO:0031254	cell trailing edge	2/228	13/19717	0.00954812	0.0446076	0.0337639	4478/4627	2	MSN/MYH9
CC	GO:0031672	A band	3/228	39/19717	0.010266	0.0472236	0.035744	2023/4606/7273	3	ENO1/MYBPC2/TTN
CC	GO:0030665	clathrin-coated vesicle membrane	5/228	115/19717	0.0108705	0.0492466	0.0372752	348/7018/7037/3482/338	5	APOE/TF/TFRC/IGF2R/APOB
MF	GO:0061134	peptidase regulator activity	34/224	219/17697	2.69517e-27	9.91824e-25	7.40464e-25	3827/462/2/2192/3700/221476/718/197/720/3699/866/5267/26998/2597/3053/5345/5265/5118/6906/5627/1293/3698/727/3273/710/1471/183/721/3697/5176/12/2335/51156/5104	34	KNG1/SERPINC1/A2M/FBLN1/ITIH4/PI16/C3/AHSG/C4A/ITIH3/SERPINA6/SERPINA4/FETUB/GAPDH/SERPIND1/SERPINF2/SERPINA1/PCOLCE/SERPINA7/PROS1/COL6A3/ITIH2/C5/HRG/SERPING1/CST3/AGT/C4B/ITIH1/SERPINF1/SERPINA3/FN1/SERPINA10/SERPINA5
MF	GO:0030414	peptidase inhibitor activity	31/224	182/17697	3.22453e-26	5.93314e-24	4.42949e-24	3827/462/2/3700/221476/718/197/720/3699/866/5267/26998/2597/3053/5345/5265/6906/5627/1293/3698/727/3273/710/1471/183/721/3697/5176/12/51156/5104	31	KNG1/SERPINC1/A2M/ITIH4/PI16/C3/AHSG/C4A/ITIH3/SERPINA6/SERPINA4/FETUB/GAPDH/SERPIND1/SERPINF2/SERPINA1/SERPINA7/PROS1/COL6A3/ITIH2/C5/HRG/SERPING1/CST3/AGT/C4B/ITIH1/SERPINF1/SERPINA3/SERPINA10/SERPINA5
MF	GO:0004866	endopeptidase inhibitor activity	30/224	175/17697	1.75706e-25	2.15532e-23	1.60909e-23	3827/462/2/3700/718/197/720/3699/866/5267/26998/2597/3053/5345/5265/6906/5627/1293/3698/727/3273/710/1471/183/721/3697/5176/12/51156/5104	30	KNG1/SERPINC1/A2M/ITIH4/C3/AHSG/C4A/ITIH3/SERPINA6/SERPINA4/FETUB/GAPDH/SERPIND1/SERPINF2/SERPINA1/SERPINA7/PROS1/COL6A3/ITIH2/C5/HRG/SERPING1/CST3/AGT/C4B/ITIH1/SERPINF1/SERPINA3/SERPINA10/SERPINA5
MF	GO:0061135	endopeptidase regulator activity	30/224	182/17697	5.88639e-25	5.41548e-23	4.04302e-23	3827/462/2/3700/718/197/720/3699/866/5267/26998/2597/3053/5345/5265/6906/5627/1293/3698/727/3273/710/1471/183/721/3697/5176/12/51156/5104	30	KNG1/SERPINC1/A2M/ITIH4/C3/AHSG/C4A/ITIH3/SERPINA6/SERPINA4/FETUB/GAPDH/SERPIND1/SERPINF2/SERPINA1/SERPINA7/PROS1/COL6A3/ITIH2/C5/HRG/SERPING1/CST3/AGT/C4B/ITIH1/SERPINF1/SERPINA3/SERPINA10/SERPINA5
MF	GO:0004857	enzyme inhibitor activity	36/224	375/17697	1.59969e-21	1.17737e-19	8.78987e-20	3827/462/2/3700/221476/718/197/720/3699/866/5267/26998/2597/344/3053/5345/5265/335/336/6906/5627/1293/3698/727/3273/710/341/1471/183/721/3697/5176/12/345/51156/5104	36	KNG1/SERPINC1/A2M/ITIH4/PI16/C3/AHSG/C4A/ITIH3/SERPINA6/SERPINA4/FETUB/GAPDH/APOC2/SERPIND1/SERPINF2/SERPINA1/APOA1/APOA2/SERPINA7/PROS1/COL6A3/ITIH2/C5/HRG/SERPING1/APOC1/CST3/AGT/C4B/ITIH1/SERPINF1/SERPINA3/APOC3/SERPINA10/SERPINA5
MF	GO:0004867	serine-type endopeptidase inhibitor activity	20/224	94/17697	2.80049e-19	1.71763e-17	1.28233e-17	462/2/3700/3699/866/5267/3053/5345/5265/6906/1293/3698/3273/710/183/3697/5176/12/51156/5104	20	SERPINC1/A2M/ITIH4/ITIH3/SERPINA6/SERPINA4/SERPIND1/SERPINF2/SERPINA1/SERPINA7/COL6A3/ITIH2/HRG/SERPING1/AGT/ITIH1/SERPINF1/SERPINA3/SERPINA10/SERPINA5
MF	GO:0004252	serine-type endopeptidase activity	24/224	160/17697	3.79209e-19	1.99356e-17	1.48833e-17	2160/3426/5340/3818/10747/715/716/4485/2147/2161/717/5648/2159/3250/629/2158/8858/3083/51279/3240/1675/5624/2155/3026	24	F11/CFI/PLG/KLKB1/MASP2/C1R/C1S/MST1/F2/F12/C2/MASP1/F10/HPR/CFB/F9/PROZ/HGFAC/C1RL/HP/CFD/PROC/F7/HABP2
MF	GO:0008236	serine-type peptidase activity	24/224	182/17697	8.25383e-18	3.79676e-16	2.83454e-16	2160/3426/5340/3818/10747/715/716/4485/2147/2161/717/5648/2159/3250/629/2158/8858/3083/51279/3240/1675/5624/2155/3026	24	F11/CFI/PLG/KLKB1/MASP2/C1R/C1S/MST1/F2/F12/C2/MASP1/F10/HPR/CFB/F9/PROZ/HGFAC/C1RL/HP/CFD/PROC/F7/HABP2
MF	GO:0017171	serine hydrolase activity	24/224	186/17697	1.37932e-17	5.63991e-16	4.21057e-16	2160/3426/5340/3818/10747/715/716/4485/2147/2161/717/5648/2159/3250/629/2158/8858/3083/51279/3240/1675/5624/2155/3026	24	F11/CFI/PLG/KLKB1/MASP2/C1R/C1S/MST1/F2/F12/C2/MASP1/F10/HPR/CFB/F9/PROZ/HGFAC/C1RL/HP/CFD/PROC/F7/HABP2
MF	GO:0005539	glycosaminoglycan binding	24/224	229/17697	1.71083e-15	6.29584e-14	4.70027e-14	3827/348/2160/5788/114770/462/2147/3075/5196/6402/1311/10894/350/6288/3053/5118/7448/7123/3273/338/3026/2335/51156/5104	24	KNG1/APOE/F11/PTPRC/PGLYRP2/SERPINC1/F2/CFH/PF4/SELL/COMP/LYVE1/APOH/SAA1/SERPIND1/PCOLCE/VTN/CLEC3B/HRG/APOB/HABP2/FN1/SERPINA10/SERPINA5
MF	GO:0008201	heparin binding	21/224	169/17697	3.45612e-15	1.15623e-13	8.63204e-14	3827/348/2160/5788/462/2147/3075/5196/6402/1311/350/6288/3053/5118/7448/7123/3273/338/2335/51156/5104	21	KNG1/APOE/F11/PTPRC/SERPINC1/F2/CFH/PF4/SELL/COMP/APOH/SAA1/SERPIND1/PCOLCE/VTN/CLEC3B/HRG/APOB/FN1/SERPINA10/SERPINA5
MF	GO:1901681	sulfur compound binding	23/224	250/17697	1.13424e-13	3.47833e-12	2.59681e-12	3827/348/2160/5788/462/2147/3075/6342/5196/6402/1311/350/6288/3053/5118/6262/7448/7123/3273/338/2335/51156/5104	23	KNG1/APOE/F11/PTPRC/SERPINC1/F2/CFH/SCP2/PF4/SELL/COMP/APOH/SAA1/SERPIND1/PCOLCE/RYR2/VTN/CLEC3B/HRG/APOB/FN1/SERPINA10/SERPINA5
MF	GO:0005201	extracellular matrix structural constituent	18/224	163/17697	2.69916e-12	7.64069e-11	5.70429e-11	2192/2243/1311/2202/4060/4256/5118/2244/7448/1293/22915/10216/9370/7450/1893/7045/2266/2335	18	FBLN1/FGA/COMP/EFEMP1/LUM/MGP/PCOLCE/FGB/VTN/COL6A3/MMRN1/PRG4/ADIPOQ/VWF/ECM1/TGFBI/FGG/FN1
MF	GO:0004175	endopeptidase activity	25/224	427/17697	2.02431e-10	5.32103e-09	3.97251e-09	2160/3426/5340/3818/10747/715/716/4485/2147/2161/717/5648/2159/3250/629/2158/8858/3083/51279/3240/10939/1675/5624/2155/3026	25	F11/CFI/PLG/KLKB1/MASP2/C1R/C1S/MST1/F2/F12/C2/MASP1/F10/HPR/CFB/F9/PROZ/HGFAC/C1RL/HP/AFG3L2/CFD/PROC/F7/HABP2
MF	GO:0001848	complement binding	7/224	21/17697	4.74006e-09	1.16289e-07	8.68179e-08	10747/733/731/325/720/629/721	7	MASP2/C8G/C8A/APCS/C4A/CFB/C4B
MF	GO:0050839	cell adhesion molecule binding	24/224	499/17697	2.26024e-08	5.19855e-07	3.88107e-07	4478/4627/8407/832/2316/2243/5216/1311/2023/83706/7094/3481/3936/1832/2244/7448/7414/7450/114990/7045/2266/3611/53841/2335	24	MSN/MYH9/TAGLN2/CAPZB/FLNA/FGA/PFN1/COMP/ENO1/FERMT3/TLN1/IGF2/LCP1/DSP/FGB/VTN/VCL/VWF/VASN/TGFBI/FGG/ILK/CDHR5/FN1
MF	GO:0002020	protease binding	12/224	128/17697	8.21955e-08	1.77929e-06	1.32836e-06	462/2/6402/1311/5345/5265/1471/7450/1893/7273/2335/5104	12	SERPINC1/A2M/SELL/COMP/SERPINF2/SERPINA1/CST3/VWF/ECM1/TTN/FN1/SERPINA5
MF	GO:0005319	lipid transporter activity	12/224	131/17697	1.0631e-07	2.17346e-06	1.62263e-06	348/55937/5950/1071/10877/5360/335/336/346/347/338/319	12	APOE/APOM/RBP4/CETP/CFHR4/PLTP/APOA1/APOA2/APOC4/APOD/APOB/APOF
MF	GO:0043178	alcohol binding	10/224	85/17697	1.17993e-07	2.28534e-06	1.70616e-06	348/733/6342/5950/1071/335/336/347/345/319	10	APOE/C8G/SCP2/RBP4/CETP/APOA1/APOA2/APOD/APOC3/APOF
MF	GO:0015485	cholesterol binding	8/224	49/17697	1.67784e-07	3.08723e-06	2.30482e-06	348/6342/1071/335/336/347/345/319	8	APOE/SCP2/CETP/APOA1/APOA2/APOD/APOC3/APOF
MF	GO:0043394	proteoglycan binding	7/224	36/17697	2.89555e-07	5.07411e-06	3.78816e-06	348/5788/2220/3075/1311/3273/2335	7	APOE/PTPRC/FCN2/CFH/COMP/HRG/FN1
MF	GO:0005496	steroid binding	10/224	95/17697	3.4128e-07	5.70869e-06	4.26192e-06	348/6342/1071/866/2638/335/336/347/345/319	10	APOE/SCP2/CETP/SERPINA6/GC/APOA1/APOA2/APOD/APOC3/APOF
MF	GO:0120013	intermembrane lipid transfer activity	6/224	24/17697	4.27843e-07	6.84549e-06	5.11062e-06	348/1071/5360/335/336/338	6	APOE/CETP/PLTP/APOA1/APOA2/APOB
MF	GO:0032934	sterol binding	8/224	56/17697	4.89771e-07	7.50982e-06	5.60658e-06	348/6342/1071/335/336/347/345/319	8	APOE/SCP2/CETP/APOA1/APOA2/APOD/APOC3/APOF
MF	GO:0070325	lipoprotein particle receptor binding	6/224	26/17697	7.16509e-07	1.0547e-05	7.87405e-06	348/1191/335/336/345/338	6	APOE/CLU/APOA1/APOA2/APOC3/APOB
MF	GO:0005178	integrin binding	11/224	132/17697	9.45772e-07	1.33863e-05	9.99379e-06	4627/1311/83706/7094/3481/3936/7448/7450/7045/3611/2335	11	MYH9/COMP/FERMT3/TLN1/IGF2/LCP1/VTN/VWF/TGFBI/ILK/FN1
MF	GO:0043395	heparan sulfate proteoglycan binding	5/224	16/17697	1.21137e-06	1.65106e-05	1.23263e-05	348/5788/3075/1311/3273	5	APOE/PTPRC/CFH/COMP/HRG
MF	GO:0016209	antioxidant activity	9/224	86/17697	1.4029e-06	1.84381e-05	1.37652e-05	3043/348/55937/3045/7001/3039/213/2878/3240	9	HBB/APOE/APOM/HBD/PRDX2/HBA1/ALB/GPX3/HP
MF	GO:0055102	lipase inhibitor activity	5/224	17/17697	1.69846e-06	2.15529e-05	1.60907e-05	344/335/336/341/345	5	APOC2/APOA1/APOA2/APOC1/APOC3
MF	GO:0043177	organic acid binding	13/224	205/17697	2.18816e-06	2.67666e-05	1.99831e-05	3043/3045/3482/6342/3039/10894/445/213/6262/1621/9370/341/5104	13	HBB/HBD/IGF2R/SCP2/HBA1/LYVE1/ASS1/ALB/RYR2/DBH/ADIPOQ/APOC1/SERPINA5
MF	GO:0017127	cholesterol transporter activity	5/224	18/17697	2.32753e-06	2.67666e-05	1.99831e-05	348/1071/335/336/338	5	APOE/CETP/APOA1/APOA2/APOB
MF	GO:0120020	intermembrane cholesterol transfer activity	5/224	18/17697	2.32753e-06	2.67666e-05	1.99831e-05	348/1071/335/336/338	5	APOE/CETP/APOA1/APOA2/APOB
MF	GO:0120015	intermembrane sterol transfer activity	5/224	19/17697	3.12631e-06	3.48631e-05	2.60277e-05	348/1071/335/336/338	5	APOE/CETP/APOA1/APOA2/APOB
MF	GO:0030246	carbohydrate binding	14/224	271/17697	9.64818e-06	0.000104427	7.79621e-05	2220/4153/325/3482/6402/78989/8455/7448/7123/10216/1621/8547/23324/721	14	FCN2/MBL2/APCS/IGF2R/SELL/COLEC11/ATRN/VTN/CLEC3B/PRG4/DBH/FCN3/MAN2B2/C4B
MF	GO:0031210	phosphatidylcholine binding	5/224	27/17697	1.99847e-05	0.000204288	0.000152515	1071/5360/336/341/5104	5	CETP/PLTP/APOA2/APOC1/SERPINA5
MF	GO:0050997	quaternary ammonium group binding	5/224	27/17697	1.99847e-05	0.000204288	0.000152515	1071/5360/336/341/5104	5	CETP/PLTP/APOA2/APOC1/SERPINA5
MF	GO:0005518	collagen binding	7/224	67/17697	2.16302e-05	0.000215133	0.000160611	1311/4060/5118/7448/7450/7045/2335	7	COMP/LUM/PCOLCE/VTN/VWF/TGFBI/FN1
MF	GO:0015248	sterol transporter activity	5/224	31/17697	4.03629e-05	0.000390882	0.00029182	348/1071/335/336/338	5	APOE/CETP/APOA1/APOA2/APOB
MF	GO:0051015	actin filament binding	10/224	198/17697	0.000220817	0.00206865	0.00154439	4627/832/2316/4606/7094/2934/3936/7171/7273/4625	10	MYH9/CAPZB/FLNA/MYBPC2/TLN1/GSN/LCP1/TPM4/TTN/MYH7
MF	GO:0031720	haptoglobin binding	3/224	10/17697	0.000224854	0.00206865	0.00154439	3043/3045/3039	3	HBB/HBD/HBA1
MF	GO:0051087	chaperone binding	7/224	102/17697	0.000316094	0.00283713	0.00211811	5340/213/1191/2244/1356/7450/2335	7	PLG/ALB/CLU/FGB/CP/VWF/FN1
MF	GO:0005543	phospholipid binding	15/224	427/17697	0.000369835	0.00320108	0.00238982	348/55937/5444/5216/350/1071/2159/7094/5360/335/336/341/345/338/5104	15	APOE/APOM/PON1/PFN1/APOH/CETP/F10/TLN1/PLTP/APOA1/APOA2/APOC1/APOC3/APOB/SERPINA5
MF	GO:0070405	ammonium ion binding	6/224	75/17697	0.000374039	0.00320108	0.00238982	590/1071/5360/336/341/5104	6	BCHE/CETP/PLTP/APOA2/APOC1/SERPINA5
MF	GO:0048018	receptor ligand activity	16/224	482/17697	0.000441821	0.00369523	0.00275874	6289/1890/2147/6291/5196/7276/2202/6288/3481/335/727/9370/3626/10447/5473/183	16	SAA2/TYMP/F2/SAA4/PF4/TTR/EFEMP1/SAA1/IGF2/APOA1/C5/ADIPOQ/INHBC/FAM3C/PPBP/AGT
MF	GO:0005044	scavenger receptor activity	5/224	51/17697	0.000454394	0.00369887	0.00276145	3426/922/3959/7448/10216	5	CFI/CD5L/LGALS3BP/VTN/PRG4
MF	GO:0001540	amyloid-beta binding	6/224	78/17697	0.000462358	0.00369887	0.00276145	348/590/712/1191/335/1471	6	APOE/BCHE/C1QA/CLU/APOA1/CST3
MF	GO:0004601	peroxidase activity	5/224	52/17697	0.000497611	0.00389619	0.00290877	3043/3045/7001/3039/2878	5	HBB/HBD/PRDX2/HBA1/GPX3
MF	GO:0005344	oxygen carrier activity	3/224	14/17697	0.000656981	0.00503686	0.00376035	3043/3045/3039	3	HBB/HBD/HBA1
MF	GO:0016684	oxidoreductase activity, acting on peroxide as acceptor	5/224	56/17697	0.000702028	0.00527237	0.00393618	3043/3045/7001/3039/2878	5	HBB/HBD/PRDX2/HBA1/GPX3
MF	GO:0038024	cargo receptor activity	6/224	85/17697	0.000731671	0.0053851	0.00402034	3426/7037/922/3959/7448/10216	6	CFI/TFRC/CD5L/LGALS3BP/VTN/PRG4
MF	GO:0071813	lipoprotein particle binding	4/224	33/17697	0.00076656	0.00542489	0.00405004	348/325/335/336	4	APOE/APCS/APOA1/APOA2
MF	GO:0071814	protein-lipid complex binding	4/224	33/17697	0.00076656	0.00542489	0.00405004	348/325/335/336	4	APOE/APCS/APOA1/APOA2
MF	GO:0031406	carboxylic acid binding	9/224	193/17697	0.000806054	0.00552054	0.00412145	3482/6342/10894/445/213/1621/9370/341/5104	9	IGF2R/SCP2/LYVE1/ASS1/ALB/DBH/ADIPOQ/APOC1/SERPINA5
MF	GO:0001846	opsonin binding	3/224	15/17697	0.000813584	0.00552054	0.00412145	10747/325/720	3	MASP2/APCS/C4A
MF	GO:0004869	cysteine-type endopeptidase inhibitor activity	5/224	58/17697	0.00082508	0.00552054	0.00412145	3827/197/26998/3273/1471	5	KNG1/AHSG/FETUB/HRG/CST3
MF	GO:0001530	lipopolysaccharide binding	4/224	35/17697	0.00096167	0.00620868	0.0046352	2147/929/3929/820	4	F2/CD14/LBP/CAMP
MF	GO:0005501	retinoid binding	4/224	35/17697	0.00096167	0.00620868	0.0046352	733/3482/5950/5104	4	C8G/IGF2R/RBP4/SERPINA5
MF	GO:0048306	calcium-dependent protein binding	5/224	61/17697	0.0010389	0.00657031	0.00490518	2220/10747/2/4153/5648	5	FCN2/MASP2/A2M/MBL2/MASP1
MF	GO:0019825	oxygen binding	4/224	36/17697	0.00107125	0.00657031	0.00490518	3043/3045/3039/213	4	HBB/HBD/HBA1/ALB
MF	GO:0019840	isoprenoid binding	4/224	36/17697	0.00107125	0.00657031	0.00490518	733/3482/5950/5104	4	C8G/IGF2R/RBP4/SERPINA5
MF	GO:0003779	actin binding	14/224	431/17697	0.0012301	0.00742091	0.00554021	4478/4627/832/2316/5216/2638/4606/7094/2934/3936/7414/7171/7273/4625	14	MSN/MYH9/CAPZB/FLNA/PFN1/GC/MYBPC2/TLN1/GSN/LCP1/VCL/TPM4/TTN/MYH7
MF	GO:0033293	monocarboxylic acid binding	5/224	64/17697	0.0012913	0.00766451	0.00572208	3482/6342/213/341/5104	5	IGF2R/SCP2/ALB/APOC1/SERPINA5
MF	GO:0050750	low-density lipoprotein particle receptor binding	3/224	21/17697	0.00224869	0.0131352	0.00980634	348/1191/338	3	APOE/CLU/APOB
MF	GO:0005537	mannose binding	3/224	22/17697	0.00257962	0.0148328	0.0110737	4153/3482/78989	3	MBL2/IGF2R/COLEC11
MF	GO:0001871	pattern binding	3/224	25/17697	0.0037467	0.0208907	0.0155963	2220/7448/10216	3	FCN2/VTN/PRG4
MF	GO:0030247	polysaccharide binding	3/224	25/17697	0.0037467	0.0208907	0.0155963	2220/7448/10216	3	FCN2/VTN/PRG4
MF	GO:0008083	growth factor activity	7/224	163/17697	0.0047752	0.0260737	0.0194658	1890/2147/2202/3481/3626/5473/183	7	TYMP/F2/EFEMP1/IGF2/INHBC/PPBP/AGT
MF	GO:0140104	molecular carrier activity	4/224	54/17697	0.00481797	0.0260737	0.0194658	3043/7018/3045/3039	4	HBB/TF/HBD/HBA1
MF	GO:0005520	insulin-like growth factor binding	3/224	28/17697	0.00519006	0.0276803	0.0206652	3482/3486/3483	3	IGF2R/IGFBP3/IGFALS
MF	GO:0005507	copper ion binding	4/224	59/17697	0.00660247	0.0347101	0.0259135	2153/213/1621/1356	4	F5/ALB/DBH/CP
MF	GO:0071723	lipopeptide binding	2/224	10/17697	0.00671295	0.0347939	0.025976	929/3929	2	CD14/LBP
MF	GO:0015643	toxic substance binding	2/224	11/17697	0.00813665	0.0415873	0.0310477	445/213	2	ASS1/ALB
MF	GO:0019842	vitamin binding	6/224	138/17697	0.00828629	0.041772	0.0311856	173/733/5950/213/2638/1621	6	AFM/C8G/RBP4/ALB/GC/DBH
MF	GO:0005504	fatty acid binding	3/224	34/17697	0.0089682	0.0445986	0.0332959	6342/213/341	3	SCP2/ALB/APOC1
MF	GO:0005200	structural constituent of cytoskeleton	5/224	102/17697	0.00959399	0.0468864	0.0350039	58/4478/3872/7094/1832	5	ACTA1/MSN/KRT17/TLN1/DSP
MF	GO:0030898	actin-dependent ATPase activity	2/224	12/17697	0.00968306	0.0468864	0.0350039	4627/4625	2	MYH9/MYH7

## Sheet: KEGG
Supplemental Data S6. Pathway enrichment results for proteins connected with the biological exposome.
ID	Description	GeneRatio	BgRatio	pvalue	p.adjust	qvalue	geneID	Count	kegg_class	geneName
hsa04610	Complement and coagulation cascades	52/135	115/10971	7.0855e-72	1.04157e-69	9.77053e-70	Q03591/P01042/P03951/A8K3L0/P05160/P00747/A8K9A9/O00187/P00736/A0A024R944/P01023/P07360/P11226/P00734/P00748/P07357/A0A024R962/P06681/P12259/B4DR57/P02671/P0C0L4/P48740/Q92496/P04003/P00742/P13671/A0A1U9X7H8/A0A024RAG6/P02748/P05546/P08697/P10643/P10909/P36980/E9KL23/Q9BXR6/P00740/P02675/D9ZGG2/A0A0S2Z4K3/P01031/P07358/E9KL26/P20851/A0A024RAB9/A0A024RAA7/P04070/P04275/P08709/P00488/A0A024R6N9	52	Organismal Systems; Immune system	CFHR1/KNG1/F11/CFI/F13B/PLG/KLKB1/MASP2/C1R/SERPINC1/A2M/C8G/MBL2/F2/F12/C8A/CFH/C2/F5/C3/FGA/C4A/MASP1/CFHR4/C4BPA/F10/C6/CFB/C1QA/C9/SERPIND1/SERPINF2/C7/CLU/CFHR2/SERPINA1/CFHR5/F9/FGB/VTN/PROS1/C5/C8B/SERPING1/C4BPB/C1QB/C1QC/PROC/VWF/F7/F13A1/SERPINA5
hsa05150	Staphylococcus aureus infection	17/135	166/10971	1.73216e-11	1.27314e-09	1.19428e-09	A8K3L0/Q04695/P00747/O00187/P00736/P11226/A0A024R962/P06681/B4DR57/P0C0L4/P48740/A0A1U9X7H8/A0A024RAG6/P01031/J3KNB4/A0A024RAB9/A0A024RAA7	17	Human Diseases; Infectious disease: bacterial	CFI/KRT17/PLG/MASP2/C1R/MBL2/CFH/C2/C3/C4A/MASP1/CFB/C1QA/C5/CAMP/C1QB/C1QC
hsa05020	Prion diseases	11/135	58/10971	9.03522e-11	4.42726e-09	4.15303e-09	P07360/P07357/P13591/P13671/A0A024RAG6/P02748/P10643/P01031/P07358/A0A024RAB9/A0A024RAA7	11	Human Diseases; Neurodegenerative disease	C8G/C8A/NCAM1/C6/C1QA/C9/C7/C5/C8B/C1QB/C1QC
hsa04979	Cholesterol metabolism	11/135	78/10971	2.50557e-09	9.20797e-08	8.63762e-08	A0A0S2Z3D5/P02749/A0A0S2Z3F6/P55058/A0A024R0T9/A0A024R3E3/P02652/A0A140VK24/A0A024R0T8/A3KPE2/P04114	11	Organismal Systems; Digestive system	APOE/APOH/CETP/PLTP/APOC2/APOA1/APOA2/LCAT/APOC1/APOC3/APOB
hsa05133	Pertussis	12/135	115/10971	1.54445e-08	4.54068e-07	4.25942e-07	P00736/P06681/B4DR57/P0C0L4/P04003/P08571/A0A024RAG6/P01031/E9KL26/P20851/A0A024RAB9/A0A024RAA7	12	Human Diseases; Infectious disease: bacterial	C1R/C2/C3/C4A/C4BPA/CD14/C1QA/C5/SERPING1/C4BPB/C1QB/C1QC
hsa05322	Systemic lupus erythematosus	14/135	176/10971	3.14083e-08	7.69504e-07	7.21841e-07	P00736/P07360/P07357/P06681/B4DR57/P0C0L4/P13671/A0A024RAG6/P02748/P10643/P01031/P07358/A0A024RAB9/A0A024RAA7	14	Human Diseases; Immune disease	C1R/C8G/C8A/C2/C3/C4A/C6/C1QA/C9/C7/C5/C8B/C1QB/C1QC
hsa05143	African trypanosomiasis	6/135	52/10971	3.97287e-05	0.000834303	0.000782626	D9YZU5/P01042/O14791/D1MGQ2/P00739/A0A024R3E3	6	Human Diseases; Infectious disease: parasitic	HBB/KNG1/APOL1/HBA1/HPR/APOA1
hsa03320	PPAR signaling pathway	7/135	126/10971	0.000915576	0.0168237	0.0157816	P22307/P55058/A0A024R3E3/P02652/A8K660/A3KPE2/Q13418	7	Organismal Systems; Endocrine system	SCP2/PLTP/APOA1/APOA2/ADIPOQ/APOC3/ILK

## Sheet: Reactome
Supplemental Data S6. Pathway enrichment results for proteins connected with the biological exposome.
ID	Description	GeneRatio	BgRatio	pvalue	p.adjust	qvalue	geneID	Count	geneName
R-HSA-166658	Complement cascade	41/200	58/10654	3.31e-59	1.34055e-56	1.17418e-56	3078/3426/1370/2220/1361/10747/1369/715/733/716/4153/2147/731/3075/717/718/720/5199/78989/5648/10877/722/729/629/712/735/730/1191/3080/81494/7448/5627/727/732/710/725/8547/1675/713/714/721	41	CFHR1/CFI/CPN2/FCN2/CPB2/MASP2/CPN1/C1R/C8G/C1S/MBL2/F2/C8A/CFH/C2/C3/C4A/CFP/COLEC11/MASP1/CFHR4/C4BPA/C6/CFB/C1QA/C9/C7/CLU/CFHR2/CFHR5/VTN/PROS1/C5/C8B/SERPING1/C4BPB/FCN3/CFD/C1QB/C1QC/C4B
R-HSA-977606	Regulation of Complement cascade	34/200	47/10654	1.23516e-49	2.50121e-47	2.19079e-47	3078/3426/1370/1361/1369/715/733/716/2147/731/3075/717/718/720/5199/10877/722/729/629/712/735/730/1191/3080/81494/7448/5627/727/732/710/725/713/714/721	34	CFHR1/CFI/CPN2/CPB2/CPN1/C1R/C8G/C1S/F2/C8A/CFH/C2/C3/C4A/CFP/CFHR4/C4BPA/C6/CFB/C1QA/C9/C7/CLU/CFHR2/CFHR5/VTN/PROS1/C5/C8B/SERPING1/C4BPB/C1QB/C1QC/C4B
R-HSA-114608	Platelet degranulation	44/200	129/10654	1.37223e-44	1.85251e-42	1.6226e-42	3827/7018/8407/5340/2/2316/3700/5196/2153/2243/197/5216/3699/350/5004/5267/213/3959/83706/7094/3481/5345/1191/5265/335/2244/7123/5627/22915/5005/3273/1/710/7414/1675/10447/5473/7450/1893/7273/2162/12/2266/2335	44	KNG1/TF/TAGLN2/PLG/A2M/FLNA/ITIH4/PF4/F5/FGA/AHSG/PFN1/ITIH3/APOH/ORM1/SERPINA4/ALB/LGALS3BP/FERMT3/TLN1/IGF2/SERPINF2/CLU/SERPINA1/APOA1/FGB/CLEC3B/PROS1/MMRN1/ORM2/HRG/A1BG/SERPING1/VCL/CFD/FAM3C/PPBP/VWF/ECM1/TTN/F13A1/SERPINA3/FGG/FN1
R-HSA-76005	Response to elevated platelet cytosolic Ca2+	44/200	134/10654	9.6908e-44	9.81193e-42	8.59421e-42	3827/7018/8407/5340/2/2316/3700/5196/2153/2243/197/5216/3699/350/5004/5267/213/3959/83706/7094/3481/5345/1191/5265/335/2244/7123/5627/22915/5005/3273/1/710/7414/1675/10447/5473/7450/1893/7273/2162/12/2266/2335	44	KNG1/TF/TAGLN2/PLG/A2M/FLNA/ITIH4/PF4/F5/FGA/AHSG/PFN1/ITIH3/APOH/ORM1/SERPINA4/ALB/LGALS3BP/FERMT3/TLN1/IGF2/SERPINF2/CLU/SERPINA1/APOA1/FGB/CLEC3B/PROS1/MMRN1/ORM2/HRG/A1BG/SERPING1/VCL/CFD/FAM3C/PPBP/VWF/ECM1/TTN/F13A1/SERPINA3/FGG/FN1
R-HSA-140877	Formation of Fibrin Clot (Clotting Cascade)	24/200	39/10654	1.76745e-32	1.43163e-30	1.25396e-30	3827/2160/2165/3818/462/2/2147/2161/5196/2153/2243/2159/3053/2811/2158/2244/5627/710/5624/7450/2155/2162/2266/5104	24	KNG1/F11/F13B/KLKB1/SERPINC1/A2M/F2/F12/PF4/F5/FGA/F10/SERPIND1/GP1BA/F9/FGB/PROS1/SERPING1/PROC/VWF/F7/F13A1/FGG/SERPINA5
R-HSA-76002	Platelet activation, signaling and aggregation	46/200	262/10654	3.20148e-32	2.161e-30	1.8928e-30	3827/7018/8407/5340/2/2147/2316/3700/5196/2153/2243/197/5216/3699/350/5004/5267/213/3959/83706/7094/3481/2811/5345/1191/5265/335/2244/7123/5627/22915/5005/3273/1/710/7414/1675/10447/5473/7450/1893/7273/2162/12/2266/2335	46	KNG1/TF/TAGLN2/PLG/A2M/F2/FLNA/ITIH4/PF4/F5/FGA/AHSG/PFN1/ITIH3/APOH/ORM1/SERPINA4/ALB/LGALS3BP/FERMT3/TLN1/IGF2/GP1BA/SERPINF2/CLU/SERPINA1/APOA1/FGB/CLEC3B/PROS1/MMRN1/ORM2/HRG/A1BG/SERPING1/VCL/CFD/FAM3C/PPBP/VWF/ECM1/TTN/F13A1/SERPINA3/FGG/FN1
R-HSA-166663	Initial triggering of complement	18/200	23/10654	1.19855e-27	6.93449e-26	6.07388e-26	2220/10747/715/716/4153/717/718/720/5199/78989/5648/629/712/8547/1675/713/714/721	18	FCN2/MASP2/C1R/C1S/MBL2/C2/C3/C4A/CFP/COLEC11/MASP1/CFB/C1QA/FCN3/CFD/C1QB/C1QC/C4B
R-HSA-381426	Regulation of Insulin-like Growth Factor (IGF) transport and uptake by Insulin-like Growth Factor Binding Proteins (IGFBPs)	29/200	125/10654	4.98486e-24	2.52358e-22	2.21039e-22	3827/348/7018/5340/462/2147/8542/2153/718/2243/197/720/3486/213/3483/3481/3053/5265/335/336/3698/1356/1471/5624/721/2266/338/2335/51156	29	KNG1/APOE/TF/PLG/SERPINC1/F2/APOL1/F5/C3/FGA/AHSG/C4A/IGFBP3/ALB/IGFALS/IGF2/SERPIND1/SERPINA1/APOA1/APOA2/ITIH2/CP/CST3/PROC/C4B/FGG/APOB/FN1/SERPINA10
R-HSA-140837	Intrinsic Pathway of Fibrin Clot Formation	15/200	22/10654	1.13549e-21	5.10971e-20	4.47556e-20	3827/2160/3818/462/2/2147/2161/2159/3053/2811/2158/710/5624/7450/5104	15	KNG1/F11/KLKB1/SERPINC1/A2M/F2/F12/F10/SERPIND1/GP1BA/F9/SERPING1/PROC/VWF/SERPINA5
R-HSA-8957275	Post-translational protein phosphorylation	25/200	108/10654	8.49035e-21	3.43859e-19	3.01184e-19	3827/348/7018/462/8542/2153/718/2243/197/720/3486/213/3053/5265/335/336/3698/1356/1471/5624/721/2266/338/2335/51156	25	KNG1/APOE/TF/SERPINC1/APOL1/F5/C3/FGA/AHSG/C4A/IGFBP3/ALB/SERPIND1/SERPINA1/APOA1/APOA2/ITIH2/CP/CST3/PROC/C4B/FGG/APOB/FN1/SERPINA10
R-HSA-140875	Common Pathway of Fibrin Clot Formation	14/200	22/10654	1.19792e-19	4.41052e-18	3.86315e-18	2165/462/2147/5196/2153/2243/2159/3053/2244/5627/5624/2162/2266/5104	14	F13B/SERPINC1/F2/PF4/F5/FGA/F10/SERPIND1/FGB/PROS1/PROC/F13A1/FGG/SERPINA5
R-HSA-166786	Creation of C4 and C2 activators	11/200	14/10654	2.6858e-17	9.06459e-16	7.93961e-16	2220/10747/715/716/4153/78989/5648/712/8547/713/714	11	FCN2/MASP2/C1R/C1S/MBL2/COLEC11/MASP1/C1QA/FCN3/C1QB/C1QC
R-HSA-2173782	Binding and Uptake of Ligands by Scavenger Receptors	13/200	42/10654	3.8506e-13	1.19961e-11	1.05073e-11	3043/348/8542/3039/78989/5648/6288/213/3250/335/3240/3263/338	13	HBB/APOE/APOL1/HBA1/COLEC11/MASP1/SAA1/ALB/HPR/APOA1/HP/HPX/APOB
R-HSA-8964058	HDL remodeling	8/200	10/10654	5.84629e-13	1.69125e-11	1.48135e-11	348/1071/213/5360/344/335/3931/345	8	APOE/CETP/ALB/PLTP/APOC2/APOA1/LCAT/APOC3
R-HSA-8963899	Plasma lipoprotein remodeling	11/200	30/10654	3.1001e-12	8.37027e-11	7.33147e-11	348/1071/213/5360/344/335/336/3931/345/338/319	11	APOE/CETP/ALB/PLTP/APOC2/APOA1/APOA2/LCAT/APOC3/APOB/APOF
R-HSA-8963898	Plasma lipoprotein assembly	9/200	18/10654	1.0163e-11	2.57251e-10	2.25324e-10	348/2/344/335/336/346/341/345/338	9	APOE/A2M/APOC2/APOA1/APOA2/APOC4/APOC1/APOC3/APOB
R-HSA-2168880	Scavenging of heme from plasma	8/200	13/10654	1.59294e-11	3.79494e-10	3.32396e-10	3043/8542/3039/213/3250/335/3240/3263	8	HBB/APOL1/HBA1/ALB/HPR/APOA1/HP/HPX
R-HSA-174824	Plasma lipoprotein assembly, remodeling, and clearance	14/200	69/10654	2.67245e-11	6.01301e-10	5.26676e-10	348/2/1071/213/5360/344/335/336/3931/346/341/345/338/319	14	APOE/A2M/CETP/ALB/PLTP/APOC2/APOA1/APOA2/LCAT/APOC4/APOC1/APOC3/APOB/APOF
R-HSA-159740	Gamma-carboxylation of protein precursors	7/200	10/10654	8.46697e-11	1.71456e-09	1.50177e-09	2147/2159/2158/5627/8858/5624/2155	7	F2/F10/F9/PROS1/PROZ/PROC/F7
R-HSA-159782	Removal of aminoterminal propeptides from gamma-carboxylated proteins	7/200	10/10654	8.46697e-11	1.71456e-09	1.50177e-09	2147/2159/2158/5627/8858/5624/2155	7	F2/F10/F9/PROS1/PROZ/PROC/F7
R-HSA-159854	Gamma-carboxylation, transport, and amino-terminal cleavage of proteins	7/200	11/10654	2.2915e-10	4.41933e-09	3.87086e-09	2147/2159/2158/5627/8858/5624/2155	7	F2/F10/F9/PROS1/PROZ/PROC/F7
R-HSA-6798695	Neutrophil degranulation	30/200	480/10654	5.49274e-09	1.01116e-07	8.85671e-08	3043/5788/567/3482/718/116844/197/6402/5199/7276/5004/929/2934/4069/5284/1832/5265/5005/3240/1/7414/820/23200/1675/1778/80184/1471/5473/10321/12	30	HBB/PTPRC/B2M/IGF2R/C3/LRG1/AHSG/SELL/CFP/TTR/ORM1/CD14/GSN/LYZ/PIGR/DSP/SERPINA1/ORM2/HP/A1BG/VCL/CAMP/ATP11B/CFD/DYNC1H1/CEP290/CST3/PPBP/CRISP3/SERPINA3
R-HSA-975634	Retinoid metabolism and transport	9/200	43/10654	7.85211e-08	1.38265e-06	1.21106e-06	348/55937/5950/7276/344/335/336/345/338	9	APOE/APOM/RBP4/TTR/APOC2/APOA1/APOA2/APOC3/APOB
R-HSA-354194	GRB2:SOS provides linkage to MAPK signaling for Integrins	6/200	15/10654	1.76517e-07	2.76976e-06	2.42601e-06	2243/7094/2244/7450/2266/2335	6	FGA/TLN1/FGB/VWF/FGG/FN1
R-HSA-372708	p130Cas linkage to MAPK signaling for integrins	6/200	15/10654	1.76517e-07	2.76976e-06	2.42601e-06	2243/7094/2244/7450/2266/2335	6	FGA/TLN1/FGB/VWF/FGG/FN1
R-HSA-6806667	Metabolism of fat-soluble vitamins	9/200	47/10654	1.77811e-07	2.76976e-06	2.42601e-06	348/55937/5950/7276/344/335/336/345/338	9	APOE/APOM/RBP4/TTR/APOC2/APOA1/APOA2/APOC3/APOB
R-HSA-76009	Platelet Aggregation (Plug Formation)	8/200	39/10654	5.00706e-07	7.51058e-06	6.57847e-06	2147/2243/7094/2811/2244/7450/2266/2335	8	F2/FGA/TLN1/GP1BA/FGB/VWF/FGG/FN1
R-HSA-5686938	Regulation of TLR by endogenous ligand	6/200	19/10654	8.98656e-07	1.29984e-05	1.13852e-05	2243/929/2244/3929/2266/338	6	FGA/CD14/FGB/LBP/FGG/APOB
R-HSA-6802948	Signaling by high-kinase activity BRAF mutants	7/200	36/10654	3.89121e-06	5.43428e-05	4.75985e-05	2243/7094/2244/7414/7450/2266/2335	7	FGA/TLN1/FGB/VCL/VWF/FGG/FN1
R-HSA-9029569	NR1H3 & NR1H2 regulate gene expression linked to cholesterol transport and efflux	7/200	37/10654	4.72345e-06	6.37665e-05	5.58527e-05	348/1071/5360/344/346/341/347	7	APOE/CETP/PLTP/APOC2/APOC4/APOC1/APOD
R-HSA-163841	Gamma carboxylation, hypusine formation and arylsulfatase activation	7/200	39/10654	6.83576e-06	8.93059e-05	7.82225e-05	2147/2159/2158/5627/8858/5624/2155	7	F2/F10/F9/PROS1/PROZ/PROC/F7
R-HSA-5674135	MAP2K and MAPK activation	7/200	40/10654	8.15513e-06	0.000103025	9.02389e-05	2243/7094/2244/7414/7450/2266/2335	7	FGA/TLN1/FGB/VCL/VWF/FGG/FN1
R-HSA-354192	Integrin alphaIIb beta3 signaling	6/200	27/10654	8.64901e-06	0.000103025	9.02389e-05	2243/7094/2244/7450/2266/2335	6	FGA/TLN1/FGB/VWF/FGG/FN1
R-HSA-9006921	Integrin signaling	6/200	27/10654	8.64901e-06	0.000103025	9.02389e-05	2243/7094/2244/7450/2266/2335	6	FGA/TLN1/FGB/VWF/FGG/FN1
R-HSA-3000480	Scavenging by Class A Receptors	5/200	19/10654	2.08137e-05	0.000240845	0.000210954	348/78989/5648/335/338	5	APOE/COLEC11/MASP1/APOA1/APOB
R-HSA-6802946	Signaling by moderate kinase activity BRAF mutants	7/200	47/10654	2.46161e-05	0.000249238	0.000218306	2243/7094/2244/7414/7450/2266/2335	7	FGA/TLN1/FGB/VCL/VWF/FGG/FN1
R-HSA-6802949	Signaling by RAS mutants	7/200	47/10654	2.46161e-05	0.000249238	0.000218306	2243/7094/2244/7414/7450/2266/2335	7	FGA/TLN1/FGB/VCL/VWF/FGG/FN1
R-HSA-6802955	Paradoxical activation of RAF signaling by kinase inactive BRAF	7/200	47/10654	2.46161e-05	0.000249238	0.000218306	2243/7094/2244/7414/7450/2266/2335	7	FGA/TLN1/FGB/VCL/VWF/FGG/FN1
R-HSA-9024446	NR1H2 and NR1H3-mediated signaling	7/200	47/10654	2.46161e-05	0.000249238	0.000218306	348/1071/5360/344/346/341/347	7	APOE/CETP/PLTP/APOC2/APOC4/APOC1/APOD
R-HSA-9649948	Signaling downstream of RAS mutants	7/200	47/10654	2.46161e-05	0.000249238	0.000218306	2243/7094/2244/7414/7450/2266/2335	7	FGA/TLN1/FGB/VCL/VWF/FGG/FN1
R-HSA-216083	Integrin cell surface interactions	9/200	85/10654	2.9038e-05	0.000286839	0.00025124	2243/1311/4060/2244/7448/1293/7450/2266/2335	9	FGA/COMP/LUM/FGB/VTN/COL6A3/VWF/FGG/FN1
R-HSA-977225	Amyloid fiber formation	10/200	109/10654	3.68352e-05	0.000355196	0.000311114	567/325/2243/7276/6288/2934/4069/335/1471/7045	10	B2M/APCS/FGA/TTR/SAA1/GSN/LYZ/APOA1/CST3/TGFBI
R-HSA-1474244	Extracellular matrix organization	17/200	301/10654	5.10223e-05	0.000480558	0.000420918	5340/3818/2/2192/4684/2243/1311/7276/2202/4060/5118/2244/7448/1293/7450/2266/2335	17	PLG/KLKB1/A2M/FBLN1/NCAM1/FGA/COMP/TTR/EFEMP1/LUM/PCOLCE/FGB/VTN/COL6A3/VWF/FGG/FN1
R-HSA-2187338	Visual phototransduction	9/200	103/10654	0.000132377	0.00121847	0.00106725	348/55937/5950/7276/344/335/336/345/338	9	APOE/APOM/RBP4/TTR/APOC2/APOA1/APOA2/APOC3/APOB
R-HSA-6802952	Signaling by BRAF and RAF fusions	7/200	67/10654	0.000247992	0.00223192	0.00195493	2243/7094/2244/7414/7450/2266/2335	7	FGA/TLN1/FGB/VCL/VWF/FGG/FN1
R-HSA-8964043	Plasma lipoprotein clearance	5/200	33/10654	0.000343118	0.00302093	0.00264601	348/335/346/341/338	5	APOE/APOA1/APOC4/APOC1/APOB
R-HSA-6802957	Oncogenic MAPK signaling	7/200	71/10654	0.000356022	0.00306785	0.00268711	2243/7094/2244/7414/7450/2266/2335	7	FGA/TLN1/FGB/VCL/VWF/FGG/FN1
R-HSA-196854	Metabolism of vitamins and cofactors	11/200	189/10654	0.000865491	0.00730258	0.00639628	348/55937/5950/7276/344/4522/686/335/336/345/338	11	APOE/APOM/RBP4/TTR/APOC2/MTHFD1/BTD/APOA1/APOA2/APOC3/APOB
R-HSA-430116	GP1b-IX-V activation signalling	3/200	12/10654	0.00126516	0.010457	0.00915918	2316/2811/7450	3	FLNA/GP1BA/VWF
R-HSA-1237044	Erythrocytes take up carbon dioxide and release oxygen	3/200	13/10654	0.00162208	0.0126335	0.0110656	3043/3039/759	3	HBB/HBA1/CA1
R-HSA-1480926	O2/CO2 exchange in erythrocytes	3/200	13/10654	0.00162208	0.0126335	0.0110656	3043/3039/759	3	HBB/HBA1/CA1
R-HSA-75205	Dissolution of Fibrin Clot	3/200	13/10654	0.00162208	0.0126335	0.0110656	5340/5345/3273	3	PLG/SERPINF2/HRG
R-HSA-3000178	ECM proteoglycans	6/200	76/10654	0.00298264	0.0227919	0.0199632	4684/1311/4060/7448/1293/2335	6	NCAM1/COMP/LUM/VTN/COL6A3/FN1
R-HSA-418594	G alpha (i) signalling events	16/200	406/10654	0.00409794	0.0307346	0.0269202	3827/348/55937/5196/718/5950/7276/6288/344/335/336/727/5473/183/345/338	16	KNG1/APOE/APOM/PF4/C3/RBP4/TTR/SAA1/APOC2/APOA1/APOA2/C5/PPBP/AGT/APOC3/APOB
R-HSA-390522	Striated Muscle Contraction	4/200	36/10654	0.00443663	0.0326697	0.0286152	58/4606/7171/7273	4	ACTA1/MYBPC2/TPM4/TTN
R-HSA-2129379	Molecules associated with elastic fibres	4/200	38/10654	0.00540017	0.0390548	0.0342078	2192/2202/7448/2335	4	FBLN1/EFEMP1/VTN/FN1
