# Supplementary material for: Precision environmental health monitoring by longitudinal exposome and multi-omics profiling
Source: Genome Res. 2022 Jun;32(6):1199–214. doi: 10.1101/gr.276521.121 (PMC9248886; doi:10.1101/gr.276521.121)
Supplement: Supplemental Material [file supp_gr.276521.121_Supplemental_Data_S7.xlsx]

## Sheet: KEGG pathway
Supplemental Data S7. Pathway enrichment results for metabolic peaks connected with the chemical exposome.
Pathway.name	Pathway.ID	Pathway.length	Overlap	Overlap.frac	p.value	p.value.bh	p.value.fdr
Glycine, serine and threonine metabolism	hsa00260	50	8	0.16	1.2644e-09	2.54144e-07	2.54144e-07
Alanine, aspartate and glutamate metabolism	hsa00250	28	6	0.214286	3.13138e-08	3.14703e-06	3.14703e-06
Protein digestion and absorption	hsa04974	47	6	0.12766	8.12775e-07	5.44559e-05	5.44559e-05
Aminoacyl-tRNA biosynthesis	hsa00970	52	6	0.115385	1.50348e-06	7.555e-05	7.555e-05
Glyoxylate and dicarboxylate metabolism	hsa00630	62	6	0.0967742	4.32115e-06	0.00017371	0.00017371
Mineral absorption	hsa04978	29	4	0.137931	5.12799e-05	0.00171788	0.00171788
beta-Alanine metabolism	hsa00410	32	4	0.125	7.64711e-05	0.00219581	0.00219581
Arginine and proline metabolism	hsa00330	78	5	0.0641026	0.000225605	0.00566833	0.00566833
Arginine biosynthesis	hsa00220	23	3	0.130435	0.000595646	0.0133028	0.0133028
GABAergic synapse	hsa04727	9	2	0.222222	0.00187768	0.0377413	0.0377413
Glutathione metabolism	hsa00480	38	3	0.0789474	0.00263441	0.0481379	0.0481379
ABC transporters	hsa02010	138	5	0.0362319	0.00305663	0.0504631	0.0504631
Synaptic vesicle cycle	hsa04721	12	2	0.166667	0.00339529	0.0504631	0.0504631
Butanoate metabolism	hsa00650	42	3	0.0714286	0.00351484	0.0504631	0.0504631
HIF-1 signaling pathway	hsa04066	15	2	0.133333	0.00532775	0.0713919	0.0713919
Neuroactive ligand-receptor interaction	hsa04080	52	3	0.0576923	0.00644044	0.080908	0.080908
Nicotinate and nicotinamide metabolism	hsa00760	55	3	0.0545455	0.00753316	0.0890686	0.0890686
Cysteine and methionine metabolism	hsa00270	63	3	0.047619	0.0109618	0.122406	0.122406
Pyrimidine metabolism	hsa00240	65	3	0.0461538	0.0119392	0.126304	0.126304
cAMP signaling pathway	hsa04024	25	2	0.08	0.014541	0.146137	0.146137
Glucagon signaling pathway	hsa04922	26	2	0.0769231	0.015681	0.150089	0.150089
Pantothenate and CoA biosynthesis	hsa00770	28	2	0.0714286	0.0180724	0.165116	0.165116
Glycolysis / Gluconeogenesis	hsa00010	31	2	0.0645161	0.0219298	0.176316	0.176316
Pyruvate metabolism	hsa00620	31	2	0.0645161	0.0219298	0.176316	0.176316
Thiamine metabolism	hsa00730	31	2	0.0645161	0.0219298	0.176316	0.176316
Pentose phosphate pathway	hsa00030	35	2	0.0571429	0.0275541	0.213014	0.213014
mTOR signaling pathway	hsa04150	4	1	0.25	0.0296364	0.220626	0.220626
Purine metabolism	hsa00230	95	3	0.0315789	0.0326465	0.234355	0.234355
Propanoate metabolism	hsa00640	48	2	0.0416667	0.0492433	0.341307	0.341307
Ascorbate and aldarate metabolism	hsa00053	49	2	0.0408163	0.0511069	0.342416	0.342416
Glutamatergic synapse	hsa04724	8	1	0.125	0.0584285	0.367004	0.367004
Estrogen signaling pathway	hsa04915	8	1	0.125	0.0584285	0.367004	0.367004
GnRH secretion	hsa04929	9	1	0.111111	0.0654974	0.395479	0.395479
Phosphonate and phosphinate metabolism	hsa00440	57	2	0.0350877	0.0668969	0.395479	0.395479
D-Arginine and D-ornithine metabolism	hsa00472	11	1	0.0909091	0.0794825	0.456457	0.456457
Insulin secretion	hsa04911	12	1	0.0833333	0.0863996	0.475806	0.475806
Porphyrin and chlorophyll metabolism	hsa00860	142	3	0.0211268	0.0875861	0.475806	0.475806
D-Glutamine and D-glutamate metabolism	hsa00471	13	1	0.0769231	0.0932667	0.493332	0.493332
Proximal tubule bicarbonate reclamation	hsa04964	17	1	0.0588235	0.120243	0.619713	0.619713
Nitrogen metabolism	hsa00910	19	1	0.0526316	0.13344	0.654183	0.654183
Retrograde endocannabinoid signaling	hsa04723	19	1	0.0526316	0.13344	0.654183	0.654183
Citrate cycle (TCA cycle)	hsa00020	20	1	0.05	0.139968	0.669845	0.669845
Taurine and hypotaurine metabolism	hsa00430	22	1	0.0454545	0.152881	0.711395	0.711395
Valine, leucine and isoleucine biosynthesis	hsa00290	23	1	0.0434783	0.159267	0.711395	0.711395
AMPK signaling pathway	hsa04152	23	1	0.0434783	0.159267	0.711395	0.711395
Taste transduction	hsa04742	33	1	0.030303	0.220643	0.964112	0.964112
Glycerolipid metabolism	hsa00561	38	1	0.0263158	0.249694	1	1
Terpenoid backbone biosynthesis	hsa00900	45	1	0.0222222	0.288624	1	1
Primary bile acid biosynthesis	hsa00120	47	1	0.0212766	0.299386	1	1
Histidine metabolism	hsa00340	47	1	0.0212766	0.299386	1	1
Inositol phosphate metabolism	hsa00562	47	1	0.0212766	0.299386	1	1
Fructose and mannose metabolism	hsa00051	54	1	0.0185185	0.335836	1	1
Lysine degradation	hsa00310	54	1	0.0185185	0.335836	1	1
Pentose and glucuronate interconversions	hsa00040	55	1	0.0181818	0.340892	1	1
Folate biosynthesis	hsa00790	57	1	0.0175439	0.350893	1	1
Fatty acid biosynthesis	hsa00061	58	1	0.0172414	0.355839	1	1
Phenylalanine metabolism	hsa00360	60	1	0.0166667	0.365623	1	1
Tyrosine metabolism	hsa00350	78	1	0.0128205	0.447486	1	1

## Sheet: Module node
Supplemental Data S7. Pathway enrichment results for metabolic peaks connected with the chemical exposome.
node	detected	class	degree	betweenness	closeness	importance	Name	true_name
C00022	Yes	Detected metabolite	8	0.218421	0.315789	8	Pyruvate;Pyruvic acid;2-Oxopropanoate;2-Oxopropanoic acid;Pyroracemic acid	Pyruvate
C00074	No	Hidden metabolite	3	0.0203641	0.26087	3	Phosphoenolpyruvate;Phosphoenolpyruvic acid;PEP	Phosphoenolpyruvate
C00631	No	Hidden metabolite	2	0.0027972	0.217822	2	2-Phospho-D-glycerate;D-Glycerate 2-phosphate;2-Phospho-(R)-glycerate	2-Phospho-D-glycerate
C00024	No	Hidden metabolite	3	0.0474553	0.247191	3	Acetyl-CoA;Acetyl coenzyme A	Acetyl-CoA
C00083	No	Hidden metabolite	2	0.00829448	0.203077	2	Malonyl-CoA;Malonyl coenzyme A	Malonyl-CoA
C00026	No	Hidden metabolite	3	0.0681358	0.290749	3	2-Oxoglutarate;Oxoglutaric acid;2-Ketoglutaric acid;alpha-Ketoglutaric acid	2-Oxoglutarate
C00037	Yes	Detected metabolite	12	0.424437	0.39521	12	Glycine;Aminoacetic acid;Gly	Glycine
C00062	Yes	Detected metabolite	6	0.138654	0.272727	6	L-Arginine;(S)-2-Amino-5-guanidinovaleric acid;L-Arg	L-Arginine
C03406	No	Hidden metabolite	3	0.0465124	0.262948	3	N-(L-Arginino)succinate;2-(Nomega-L-Arginino)succinate;L-Argininosuccinate;L-Argininosuccinic acid;L-Arginosuccinic acid	N-(L-Arginino)succinate
C00036	No	Hidden metabolite	4	0.0804407	0.286957	4	Oxaloacetate;Oxalacetic acid;Oxaloacetic acid;2-Oxobutanedioic acid;2-Oxosuccinic acid;keto-Oxaloacetate	Oxaloacetate
C00025	No	Hidden metabolite	10	0.250145	0.351064	10	L-Glutamate;L-Glutamic acid;L-Glutaminic acid;Glutamate	L-Glutamate
C00327	No	Hidden metabolite	4	0.0168959	0.255814	4	L-Citrulline;2-Amino-5-ureidovaleric acid;Citrulline	L-Citrulline
C00169	No	Hidden metabolite	3	0.0239771	0.285714	3	Carbamoyl phosphate	Carbamoyl phosphate
C00014	No	Hidden metabolite	6	0.095661	0.358696	6	Ammonia;NH3	Ammonia
C00065	No	Hidden metabolite	6	0.206095	0.352941	6	L-Serine;L-2-Amino-3-hydroxypropionic acid;L-3-Hydroxy-alanine;Serine	L-Serine
C00143	No	Hidden metabolite	4	0.0572561	0.323529	4	5,10-Methylenetetrahydrofolate;(6R)-5,10-Methylenetetrahydrofolate;5,10-Methylene-THF	5,10-Methylenetetrahydrofolate
C00581	No	Hidden metabolite	3	0.150118	0.311321	3	Guanidinoacetate;Guanidinoacetic acid;Glycocyamine;N-Amidinoglycine;Guanidoacetic acid	Guanidinoacetate
C00077	No	Hidden metabolite	3	0.013885	0.238267	3	L-Ornithine;(S)-2,5-Diaminovaleric acid;(S)-2,5-Diaminopentanoic acid;(S)-2,5-Diaminopentanoate	L-Ornithine
C00097	No	Hidden metabolite	4	0.0342868	0.304147	4	L-Cysteine;L-2-Amino-3-mercaptopropionic acid	L-Cysteine
C00051	No	Hidden metabolite	5	0.018966	0.318841	5	Glutathione;5-L-Glutamyl-L-cysteinylglycine;N-(N-gamma-L-Glutamyl-L-cysteinyl)glycine;gamma-L-Glutamyl-L-cysteinyl-glycine;GSH;Reduced glutathione	Glutathione
C00669	No	Hidden metabolite	4	0.0176202	0.295964	4	gamma-L-Glutamyl-L-cysteine;L-gamma-Glutamylcysteine;5-L-Glutamyl-L-cysteine;gamma-Glutamylcysteine	gamma-L-Glutamyl-L-cysteine
C00258	Yes	Detected metabolite	3	0.0160773	0.23913	3	D-Glycerate;Glycerate;(R)-Glycerate;Glyceric acid	D-Glycerate
C05946	No	Hidden metabolite	2	0.0127817	0.278481	2	(4R)-4-Hydroxy-2-oxoglutarate;(R)-2-Hydroxy-4-oxopentanedioate;D-4-Hydroxy-2-oxoglutarate	(4R)-4-Hydroxy-2-oxoglutarate
C00168	Yes	Detected metabolite	5	0.110522	0.286957	5	Hydroxypyruvate;Hydroxypyruvic acid;3-Hydroxypyruvate;3-Hydroxypyruvic acid	Hydroxypyruvate
C00101	No	Hidden metabolite	5	0.123559	0.308411	5	Tetrahydrofolate;5,6,7,8-Tetrahydrofolate;Tetrahydrofolic acid;THF;(6S)-Tetrahydrofolate;(6S)-Tetrahydrofolic acid;(6S)-THFA	Tetrahydrofolate
C00415	No	Hidden metabolite	3	0.0596737	0.257812	3	Dihydrofolate;Dihydrofolic acid;7,8-Dihydrofolate;7,8-Dihydrofolic acid;7,8-Dihydropteroylglutamate	Dihydrofolate
C00931	Yes	Detected metabolite	2	0.030303	0.229965	2	Porphobilinogen	Porphobilinogen
C00049	Yes	Detected metabolite	5	0.163524	0.317308	5	L-Aspartate;L-Aspartic acid;2-Aminosuccinic acid;L-Asp	L-Aspartate
C00073	Yes	Detected metabolite	2	0.030303	0.195266	2	L-Methionine;Methionine;L-2-Amino-4methylthiobutyric acid	L-Methionine
C00499	Yes	Detected metabolite	2	0.030303	0.180328	2	Allantoate;Allantoic acid	Allantoate
nHILIC_87.0087_4.4		Peak	3	0.0204934	0.24812	3
nHILIC_74.0246_9.6		Peak	1	0	0.284483	1
nHILIC_132.0302_8.3		Peak	2	0.00805195	0.243542	2
pHILIC_175.1188_15.1		Peak	1	0	0.214984	1
pHILIC_147.0763_9.7		Peak	2	0.00048174	0.236559	2
pHILIC_150.0581_7		Peak	1	0	0.163772	1
nHILIC_131.0461_9.7		Peak	1	0	0.196429	1
nHILIC_103.0036_4		Peak	3	0.024728	0.228374	3
nHILIC_89.0243_5.8		Peak	1	0	0.195846	1
pHILIC_114.0661_2.5		Peak	1	0	0.194118	1
pHILIC_104.0705_8.1		Peak	1	0	0.208861	1
nHILIC_130.0509_8.8		Peak	2	0.0032634	0.252874	2
nHILIC_157.0366_6.1		Peak	1	0	0.153132	1
nHILIC_349.0752_8.5		Peak	1	0	0.171875	1
nHILIC_261.0725_10.7		Peak	1	0	0.1875	1
nHILIC_177.0339_6.7		Peak	1	0	0.23741	1
nHILIC_129.0192_7.6		Peak	1	0	0.185915	1
nHILIC_116.0352_7.5		Peak	1	0	0.223729	1
C00186	Yes	Detected metabolite	2	0.030303	0.242647	2	(S)-Lactate;L-Lactate;L-Lactic acid	(S)-Lactate
C00383	Yes	Detected metabolite	2	0.0034188	0.195846	2	Malonate;Malonic acid;Propanedioic acid	Malonate
C00064	Yes	Detected metabolite	4	0.023249	0.298643	4	L-Glutamine;L-2-Aminoglutaramic acid	L-Glutamine
C00402	Yes	Detected metabolite	2	0.00353535	0.225256	2	D-Aspartate;D-Aspartic acid	D-Aspartate
C00334	Yes	Detected metabolite	2	0.030303	0.262948	2	4-Aminobutanoate;4-Aminobutanoic acid;4-Aminobutyrate;4-Aminobutyric acid;gamma-Aminobutyric acid;GABA	4-Aminobutanoate
C00300	Yes	Detected metabolite	2	0.030303	0.24	2	Creatine;alpha-Methylguanidino acetic acid;Methylglycocyamine	Creatine
C01165	Yes	Detected metabolite	3	0.0345255	0.282051	3	L-Glutamate 5-semialdehyde;L-Glutamate gamma-semialdehyde	L-Glutamate 5-semialdehyde
C00222	Yes	Detected metabolite	2	0.0010101	0.203077	2	3-Oxopropanoate;Malonate semialdehyde	3-Oxopropanoate
C01419	Yes	Detected metabolite	4	0.0360528	0.309859	4	Cys-Gly;L-Cysteinylglycine	Cys-Gly
C01879	Yes	Detected metabolite	4	0.0109091	0.276151	4	Pidolic acid;5-Oxoproline;Pyroglutamic acid;5-Pyrrolidone-2-carboxylic acid;Pyroglutamate;5-Oxo-L-proline;L-Pyroglutamic acid;L-5-Pyrrolidone-2-carboxylic acid	Pidolic acid
C00048	No	Hidden metabolite	4	0.0870979	0.326733	4	Glyoxylate;Glyoxalate;Glyoxylic acid	Glyoxylate
C00921	Yes	Detected metabolite	2	0.030303	0.206897	2	Dihydropteroate;7,8-Dihydropteroate	Dihydropteroate
C00430	Yes	Detected metabolite	3	0.0760684	0.294643	3	5-Aminolevulinate;5-Amino-4-oxopentanoate;5-Amino-4-oxovaleric acid	5-Aminolevulinate
C00152	Yes	Detected metabolite	2	0.030303	0.243542	2	L-Asparagine;2-Aminosuccinamic acid	L-Asparagine
C02430	No	Hidden metabolite	2	0.0596737	0.24	2	L-Methionyl-tRNA;L-Methionyl-tRNA(Met)	L-Methionyl-tRNA
C00086	No	Hidden metabolite	2	0.0596737	0.217822	2	Urea;Carbamide	Urea
C03508	Yes	Detected metabolite	2	0.030303	0.286957	2	L-2-Amino-3-oxobutanoic acid;L-2-Amino-3-oxobutanoate;L-2-Amino-acetoacetate;(S)-2-Amino-3-oxobutanoic acid	L-2-Amino-3-oxobutanoic acid
C01146	Yes	Detected metabolite	2	0	0.226027	2	2-Hydroxy-3-oxopropanoate;Tartronate semialdehyde	2-Hydroxy-3-oxopropanoate
C02630	Yes	Detected metabolite	2	0.030303	0.227586	2	2-Hydroxyglutarate;alpha-Hydroxyglutarate	2-Hydroxyglutarate

## Sheet: Module edge
Supplemental Data S7. Pathway enrichment results for metabolic peaks connected with the chemical exposome.
from	to	mz.error	Adduct	class
C00022	C00024	0		c-c
C00022	C00186	0		c-c
C00022	C00074	0		c-c
C00074	C00631	0		c-c
C00022	C00036	0		c-c
C00074	C00036	0		c-c
C00631	C00258	0		c-c
C00024	C00083	0		c-c
C00083	C00383	0		c-c
C00026	C00025	0		c-c
C00037	C00025	0		c-c
C00062	C03406	0		c-c
C00062	C00327	0		c-c
C03406	C00327	0		c-c
C00036	C00049	0		c-c
C00025	C00049	0		c-c
C03406	C00049	0		c-c
C00327	C00169	0		c-c
C00062	C00077	0		c-c
C00327	C00077	0		c-c
C00037	C00014	0		c-c
C00025	C00014	0		c-c
C00169	C00014	0		c-c
C00025	C00064	0		c-c
C00169	C00064	0		c-c
C00014	C00064	0		c-c
C00036	C00402	0		c-c
C00025	C00334	0		c-c
C00022	C00065	0		c-c
C00037	C00065	0		c-c
C00014	C00065	0		c-c
C00037	C00581	0		c-c
C00062	C00581	0		c-c
C00037	C00143	0		c-c
C00065	C00143	0		c-c
C00037	C00101	0		c-c
C00014	C00101	0		c-c
C00143	C00101	0		c-c
C00022	C00097	0		c-c
C00065	C00097	0		c-c
C00581	C00300	0		c-c
C00022	C05946	0		c-c
C00025	C01165	0		c-c
C00077	C01165	0		c-c
C00024	C00222	0		c-c
C00037	C00051	0		c-c
C00025	C00051	0		c-c
C00025	C00669	0		c-c
C00097	C00669	0		c-c
C00051	C00669	0		c-c
C00037	C01419	0		c-c
C00097	C01419	0		c-c
C00051	C01419	0		c-c
C00025	C01879	0		c-c
C00051	C01879	0		c-c
C00669	C01879	0		c-c
C00258	C00168	0		c-c
C00065	C00168	0		c-c
C00026	C00048	0		c-c
C00037	C00048	0		c-c
C05946	C00048	0		c-c
C00168	C00048	0		c-c
C00143	C00415	0		c-c
C00101	C00415	0		c-c
C00415	C00921	0		c-c
C00037	C00430	0		c-c
C00931	C00430	0		c-c
C00049	C00152	0		c-c
C00101	C02430	0		c-c
C00073	C02430	0		c-c
C00062	C00086	0		c-c
C00499	C00086	0		c-c
C00037	C03508	0		c-c
C00168	C01146	0		c-c
C00026	C02630	0		c-c
nHILIC_87.0087_4.4	C00022	1.20251	M-H	p-c
nHILIC_74.0246_9.6	C00037	0.991495	M-H	p-c
nHILIC_132.0302_8.3	C00049	1.29317	M-H	p-c
pHILIC_175.1188_15.1	C00062	1.75198	M+H	p-c
pHILIC_147.0763_9.7	C00064	1.6682	M+H	p-c
pHILIC_150.0581_7	C00073	1.93596	M+H	p-c
nHILIC_131.0461_9.7	C00152	1.08215	M-H	p-c
nHILIC_103.0036_4	C00168	1.16594	M-H	p-c
nHILIC_89.0243_5.8	C00186	1.07734	M-H	p-c
nHILIC_87.0087_4.4	C00222	1.20251	M-H	p-c
nHILIC_87.0087_4.4	C00258	1.20251	M-H-H2O	p-c
pHILIC_114.0661_2.5	C00300	1.59229	M+H-H2O	p-c
pHILIC_104.0705_8.1	C00334	1.63403	M+H	p-c
nHILIC_103.0036_4	C00383	1.16594	M-H	p-c
nHILIC_132.0302_8.3	C00402	1.29317	M-H	p-c
nHILIC_130.0509_8.8	C00430	1.20457	M-H	p-c
nHILIC_157.0366_6.1	C00499	1.08732	M-H-H2O	p-c
nHILIC_349.0752_8.5	C00921	15.9778	M+Cl	p-c
nHILIC_261.0725_10.7	C00931	20.7257	M+Cl	p-c
nHILIC_103.0036_4	C01146	1.16594	M-H	p-c
nHILIC_130.0509_8.8	C01165	1.20457	M-H	p-c
nHILIC_177.0339_6.7	C01419	1.28023	M-H	p-c
pHILIC_147.0763_9.7	C01879	1.6682	M+NH4	p-c
nHILIC_129.0192_7.6	C02630	1.04076	M-H-H2O	p-c
nHILIC_116.0352_7.5	C03508	1.07975	M-H	p-c
