# Supplementary material for: Precision environmental health monitoring by longitudinal exposome and multi-omics profiling
Source: Genome Res. 2022 Jun;32(6):1199–214. doi: 10.1101/gr.276521.121 (PMC9248886; doi:10.1101/gr.276521.121)
Supplement: Supplemental Material [file supp_gr.276521.121_Supplemental_Data_S8.xlsx]

## Sheet: KEGG pathway
Supplemental Data S8. Pathway enrichment results for metabolic peaks connected with the biological exposome.
Pathway.name	Pathway.ID	Pathway.length	Overlap	Overlap.frac	p.value	p.value.bh	p.value.fdr
Galactose metabolism	hsa00052	46	13	0.282609	1.08394e-10	1.47248e-08	1.47248e-08
Protein digestion and absorption	hsa04974	47	13	0.276596	1.46516e-10	1.47248e-08	1.47248e-08
ABC transporters	hsa02010	138	20	0.144928	3.63644e-10	2.43642e-08	2.43642e-08
Alanine, aspartate and glutamate metabolism	hsa00250	28	10	0.357143	1.34759e-09	5.42255e-08	5.42255e-08
Tyrosine metabolism	hsa00350	78	15	0.192308	1.34889e-09	5.42255e-08	5.42255e-08
Glycine, serine and threonine metabolism	hsa00260	50	12	0.24	4.78095e-09	1.60162e-07	1.60162e-07
Aminoacyl-tRNA biosynthesis	hsa00970	52	12	0.230769	7.76888e-09	2.23078e-07	2.23078e-07
Mineral absorption	hsa04978	29	9	0.310345	3.93942e-08	9.8978e-07	9.8978e-07
Arginine and proline metabolism	hsa00330	78	13	0.166667	1.14391e-07	2.55474e-06	2.55474e-06
Pentose phosphate pathway	hsa00030	35	9	0.257143	2.42357e-07	4.87137e-06	4.87137e-06
Glyoxylate and dicarboxylate metabolism	hsa00630	62	11	0.177419	6.09813e-07	1.11429e-05	1.11429e-05
beta-Alanine metabolism	hsa00410	32	8	0.25	1.49895e-06	2.51073e-05	2.51073e-05
Arginine biosynthesis	hsa00220	23	7	0.304348	1.64419e-06	2.54216e-05	2.54216e-05
Taste transduction	hsa04742	33	8	0.242424	1.93428e-06	2.77707e-05	2.77707e-05
Histidine metabolism	hsa00340	47	9	0.191489	3.56141e-06	4.77229e-05	4.77229e-05
Cysteine and methionine metabolism	hsa00270	63	9	0.142857	4.30107e-05	0.000540322	0.000540322
Glucagon signaling pathway	hsa04922	26	6	0.230769	5.49242e-05	0.000649398	0.000649398
Synaptic vesicle cycle	hsa04721	12	4	0.333333	0.000225905	0.00252261	0.00252261
Neuroactive ligand-receptor interaction	hsa04080	52	7	0.134615	0.000467309	0.00494364	0.00494364
Glutathione metabolism	hsa00480	38	6	0.157895	0.000504378	0.005069	0.005069
Proximal tubule bicarbonate reclamation	hsa04964	17	4	0.235294	0.000976946	0.00935077	0.00935077
Glycolysis / Gluconeogenesis	hsa00010	31	5	0.16129	0.00137401	0.0125534	0.0125534
GABAergic synapse	hsa04727	9	3	0.333333	0.00150921	0.0131892	0.0131892
Citrate cycle (TCA cycle)	hsa00020	20	4	0.2	0.0018666	0.0156328	0.0156328
Taurine and hypotaurine metabolism	hsa00430	22	4	0.181818	0.00270176	0.0217222	0.0217222
Sulfur relay system	hsa04122	11	3	0.272727	0.0028479	0.0220165	0.0220165
Fructose and mannose metabolism	hsa00051	54	6	0.111111	0.00331123	0.0246503	0.0246503
Dopaminergic synapse	hsa04728	12	3	0.25	0.0037219	0.0267179	0.0267179
cAMP signaling pathway	hsa04024	25	4	0.16	0.00438622	0.030401	0.030401
Pantothenate and CoA biosynthesis	hsa00770	28	4	0.142857	0.00666582	0.044661	0.044661
FoxO signaling pathway	hsa04068	5	2	0.4	0.00711852	0.0455372	0.0455372
HIF-1 signaling pathway	hsa04066	15	3	0.2	0.0072497	0.0455372	0.0455372
Thiamine metabolism	hsa00730	31	4	0.129032	0.00961952	0.0585916	0.0585916
Glutamatergic synapse	hsa04724	8	2	0.25	0.0188843	0.111639	0.111639
Glycerolipid metabolism	hsa00561	38	4	0.105263	0.0194994	0.111982	0.111982
Butanoate metabolism	hsa00650	42	4	0.0952381	0.0272106	0.151926	0.151926
Adrenergic signaling in cardiomyocytes	hsa04261	10	2	0.2	0.0292824	0.159075	0.159075
D-Arginine and D-ornithine metabolism	hsa00472	11	2	0.181818	0.0351568	0.181192	0.181192
Gap junction	hsa04540	11	2	0.181818	0.0351568	0.181192	0.181192
Carbohydrate digestion and absorption	hsa04973	27	3	0.111111	0.0367522	0.18468	0.18468
Insulin secretion	hsa04911	12	2	0.166667	0.0414437	0.203175	0.203175
D-Glutamine and D-glutamate metabolism	hsa00471	13	2	0.153846	0.0481166	0.230273	0.230273
Pyruvate metabolism	hsa00620	31	3	0.0967742	0.0522235	0.244115	0.244115
Regulation of lipolysis in adipocytes	hsa04923	14	2	0.142857	0.05515	0.251935	0.251935
Sulfur metabolism	hsa00920	33	3	0.0909091	0.0609637	0.272305	0.272305
Amino sugar and nucleotide sugar metabolism	hsa00520	108	6	0.0555556	0.0754639	0.329744	0.329744
Renin secretion	hsa04924	17	2	0.117647	0.078173	0.334314	0.334314
Nitrogen metabolism	hsa00910	19	2	0.105263	0.0949025	0.389294	0.389294
Retrograde endocannabinoid signaling	hsa04723	19	2	0.105263	0.0949025	0.389294	0.389294
Pyrimidine metabolism	hsa00240	65	4	0.0615385	0.102684	0.401305	0.401305
Lysosome	hsa04142	4	1	0.25	0.105817	0.401305	0.401305
mTOR signaling pathway	hsa04150	4	1	0.25	0.105817	0.401305	0.401305
Insulin signaling pathway	hsa04910	4	1	0.25	0.105817	0.401305	0.401305
AMPK signaling pathway	hsa04152	23	2	0.0869565	0.130961	0.487466	0.487466
Propanoate metabolism	hsa00640	48	3	0.0625	0.144763	0.529043	0.529043
Ascorbate and aldarate metabolism	hsa00053	49	3	0.0612245	0.151297	0.54305	0.54305
NOD-like receptor signaling pathway	hsa04621	6	1	0.166667	0.154492	0.544788	0.544788
Long-term potentiation	hsa04720	7	1	0.142857	0.177837	0.616298	0.616298
Nicotinate and nicotinamide metabolism	hsa00760	55	3	0.0545455	0.192317	0.655183	0.655183
Estrogen signaling pathway	hsa04915	8	1	0.125	0.200545	0.671826	0.671826
Ferroptosis	hsa04216	31	2	0.0645161	0.209809	0.691339	0.691339
Circadian entrainment	hsa04713	9	1	0.111111	0.222632	0.699204	0.699204
Long-term depression	hsa04730	9	1	0.111111	0.222632	0.699204	0.699204
GnRH secretion	hsa04929	9	1	0.111111	0.222632	0.699204	0.699204
Phospholipase D signaling pathway	hsa04072	11	1	0.0909091	0.265011	0.796428	0.796428
Prolactin signaling pathway	hsa04917	11	1	0.0909091	0.265011	0.796428	0.796428
Purine metabolism	hsa00230	95	4	0.0421053	0.265476	0.796428	0.796428
Starch and sucrose metabolism	hsa00500	37	2	0.0540541	0.271574	0.802739	0.802739
C-type lectin receptor signaling pathway	hsa04625	12	1	0.0833333	0.285335	0.831195	0.831195
Sphingolipid signaling pathway	hsa04071	15	1	0.0666667	0.343032	0.984991	0.984991
Vascular smooth muscle contraction	hsa04270	16	1	0.0625	0.36122	1	1
Inositol phosphate metabolism	hsa00562	47	2	0.0425532	0.373679	1	1
Salivary secretion	hsa04970	17	1	0.0588235	0.378911	1	1
Phosphonate and phosphinate metabolism	hsa00440	57	2	0.0350877	0.469807	1	1
Valine, leucine and isoleucine biosynthesis	hsa00290	23	1	0.0434783	0.475322	1	1
Thermogenesis	hsa04714	23	1	0.0434783	0.475322	1	1
Sphingolipid metabolism	hsa00600	25	1	0.04	0.504044	1	1
Selenocompound metabolism	hsa00450	27	1	0.037037	0.531211	1	1
Porphyrin and chlorophyll metabolism	hsa00860	142	4	0.028169	0.555949	1	1
Phosphatidylinositol signaling system	hsa04070	29	1	0.0344828	0.556904	1	1
Neomycin, kanamycin and gentamicin biosynthesis	hsa00524	81	2	0.0246914	0.660982	1	1
Vitamin digestion and absorption	hsa04977	39	1	0.025641	0.665904	1	1
Terpenoid backbone biosynthesis	hsa00900	45	1	0.0222222	0.718088	1	1
Primary bile acid biosynthesis	hsa00120	47	1	0.0212766	0.733622	1	1
Lysine degradation	hsa00310	54	1	0.0185185	0.781615	1	1
Pentose and glucuronate interconversions	hsa00040	55	1	0.0181818	0.787733	1	1
Folate biosynthesis	hsa00790	57	1	0.0175439	0.799465	1	1
Fatty acid biosynthesis	hsa00061	58	1	0.0172414	0.805088	1	1
Phenylalanine metabolism	hsa00360	60	1	0.0166667	0.81587	1	1
Bile secretion	hsa04976	174	1	0.00574713	0.993232	1	1

## Sheet: Module node
Supplemental Data S8. Pathway enrichment results for metabolic peaks connected with the biological exposome.
node	detected	class	degree	betweenness	closeness	importance	Name	true_name
C00068	No	Hidden metabolite	2	0.0182641	0.1469	2	Thiamin diphosphate;Thiamine diphosphate;Thiamin pyrophosphate;TPP;ThPP	Thiamin diphosphate
C00022	Yes	Detected metabolite	11	0.13069	0.20566	11	Pyruvate;Pyruvic acid;2-Oxopropanoate;2-Oxopropanoic acid;Pyroracemic acid	Pyruvate
C00074	No	Hidden metabolite	3	0.0106611	0.187124	3	Phosphoenolpyruvate;Phosphoenolpyruvic acid;PEP	Phosphoenolpyruvate
C00118	No	Hidden metabolite	5	0.0390145	0.166794	5	D-Glyceraldehyde 3-phosphate;(2R)-2-Hydroxy-3-(phosphonooxy)-propanal;Glyceraldehyde 3-phosphate	D-Glyceraldehyde 3-phosphate
C05345	No	Hidden metabolite	9	0.255986	0.184433	9	beta-D-Fructose 6-phosphate	beta-D-Fructose 6-phosphate
C00668	No	Hidden metabolite	3	0.0199868	0.159941	3	alpha-D-Glucose 6-phosphate	alpha-D-Glucose 6-phosphate
C01172	No	Hidden metabolite	4	0.0239026	0.160412	4	beta-D-Glucose 6-phosphate	beta-D-Glucose 6-phosphate
C00221	Yes	Detected metabolite	5	0.00819198	0.143421	5	beta-D-Glucose	beta-D-Glucose
C00026	No	Hidden metabolite	5	0.0653215	0.199634	5	2-Oxoglutarate;Oxoglutaric acid;2-Ketoglutaric acid;alpha-Ketoglutaric acid	2-Oxoglutarate
C00036	No	Hidden metabolite	6	0.0457125	0.195691	6	Oxaloacetate;Oxalacetic acid;Oxaloacetic acid;2-Oxobutanedioic acid;2-Oxosuccinic acid;keto-Oxaloacetate	Oxaloacetate
C00311	Yes	Detected metabolite	4	0.0239052	0.171654	4	Isocitrate;Isocitric acid;1-Hydroxytricarballylic acid;1-Hydroxypropane-1,2,3-tricarboxylic acid	Isocitrate
C00024	No	Hidden metabolite	4	0.0217944	0.177524	4	Acetyl-CoA;Acetyl coenzyme A	Acetyl-CoA
C00417	No	Hidden metabolite	3	0.0182641	0.153629	3	cis-Aconitate;cis-Aconitic acid	cis-Aconitate
C00117	No	Hidden metabolite	4	0.0221514	0.145917	4	D-Ribose 5-phosphate;Ribose 5-phosphate	D-Ribose 5-phosphate
C00199	No	Hidden metabolite	3	0.00775909	0.14202	3	D-Ribulose 5-phosphate	D-Ribulose 5-phosphate
C00345	Yes	Detected metabolite	4	0.0236731	0.138062	4	6-Phospho-D-gluconate	6-Phospho-D-gluconate
C00257	Yes	Detected metabolite	3	0.0300858	0.146309	3	D-Gluconic acid;D-Gluconate;D-gluco-Hexonic acid	D-Gluconic acid
C00631	No	Hidden metabolite	2	0.0078787	0.173153	2	2-Phospho-D-glycerate;D-Glycerate 2-phosphate;2-Phospho-(R)-glycerate	2-Phospho-D-glycerate
C00267	Yes	Detected metabolite	8	0.0167138	0.143045	8	alpha-D-Glucose	alpha-D-Glucose
C00794	Yes	Detected metabolite	4	0.0167925	0.143799	4	D-Sorbitol;D-Glucitol;L-Gulitol;Sorbitol	D-Sorbitol
C00159	Yes	Detected metabolite	5	0.00748712	0.141375	5	D-Mannose;Mannose;Seminose;Carubinose	D-Mannose
C00095	Yes	Detected metabolite	7	0.10545	0.165026	7	D-Fructose;Levulose;Fruit sugar;D-arabino-Hexulose	D-Fructose
C00258	Yes	Detected metabolite	4	0.0661093	0.186007	4	D-Glycerate;Glycerate;(R)-Glycerate;Glyceric acid	D-Glycerate
C01094	No	Hidden metabolite	3	0.0235666	0.157401	3	D-Fructose 1-phosphate	D-Fructose 1-phosphate
C01613	No	Hidden metabolite	2	0.000625353	0.118801	2	Stachyose	Stachyose
C00089	No	Hidden metabolite	3	0.0192517	0.143233	3	Sucrose;Cane sugar;Saccharose;1-alpha-D-Glucopyranosyl-2-beta-D-fructofuranoside	Sucrose
C05404	Yes	Detected metabolite	3	0.00205511	0.118996	3	D-Gal alpha 1->6D-Gal alpha 1->6D-Glucose;D-Gal-alpha1->6D-Gal-alpha1->6D-Glucose;Manninotriose	D-Gal alpha 1->6D-Gal alpha 1->6D-Glucose
C05402	No	Hidden metabolite	3	0.000485236	0.119191	3	Melibiose;6-O-(alpha-D-Galactopyranosyl)-D-glucopyranose;D-Gal-alpha1->6D-Glucose	Melibiose
C00124	Yes	Detected metabolite	13	0.0495571	0.134319	13	D-Galactose;D-Galactopyranose	D-Galactose
C01235	No	Hidden metabolite	2	0.000239575	0.118801	2	alpha-D-Galactosyl-(1->3)-1D-myo-inositol;O-alpha-D-Galactosyl-(1->3)-1D-myo-inositol;3-O-alpha-D-Galactosyl-1D-myo-inositol;1-alpha-D-Galactosyl-myo-inositol;Galactinol	alpha-D-Galactosyl-(1->3)-1D-myo-inositol
C00083	No	Hidden metabolite	2	0.00289084	0.151811	2	Malonyl-CoA;Malonyl coenzyme A	Malonyl-CoA
C00037	Yes	Detected metabolite	13	0.292974	0.230444	13	Glycine;Aminoacetic acid;Gly	Glycine
C00062	Yes	Detected metabolite	7	0.111164	0.191733	7	L-Arginine;(S)-2-Amino-5-guanidinovaleric acid;L-Arg	L-Arginine
C03406	No	Hidden metabolite	4	0.0480619	0.189565	4	N-(L-Arginino)succinate;2-(Nomega-L-Arginino)succinate;L-Argininosuccinate;L-Argininosuccinic acid;L-Arginosuccinic acid	N-(L-Arginino)succinate
C00025	Yes	Detected metabolite	13	0.309454	0.232657	13	L-Glutamate;L-Glutamic acid;L-Glutaminic acid;Glutamate	L-Glutamate
C00327	Yes	Detected metabolite	5	0.0476872	0.19207	5	L-Citrulline;2-Amino-5-ureidovaleric acid;Citrulline	L-Citrulline
C00437	Yes	Detected metabolite	2	0.00917431	0.151599	2	N-Acetylornithine;N2-Acetyl-L-ornithine	N-Acetylornithine
C00169	No	Hidden metabolite	4	0.0487674	0.205273	4	Carbamoyl phosphate	Carbamoyl phosphate
C00014	No	Hidden metabolite	7	0.0980193	0.228512	7	Ammonia;NH3	Ammonia
C00049	Yes	Detected metabolite	8	0.154134	0.212476	8	L-Aspartate;L-Aspartic acid;2-Aminosuccinic acid;L-Asp	L-Aspartate
C03794	No	Hidden metabolite	3	0.00299875	0.179572	3	N6-(1,2-Dicarboxyethyl)-AMP;N6-(1,2-Dicarboxyethyl)AMP;Adenylosuccinate;Adenylosuccinic acid	N6-(1,2-Dicarboxyethyl)-AMP
C00065	Yes	Detected metabolite	9	0.123682	0.218218	9	L-Serine;L-2-Amino-3-hydroxypropionic acid;L-3-Hydroxy-alanine;Serine	L-Serine
C00143	No	Hidden metabolite	4	0.0126632	0.198362	4	5,10-Methylenetetrahydrofolate;(6R)-5,10-Methylenetetrahydrofolate;5,10-Methylene-THF	5,10-Methylenetetrahydrofolate
C01180	No	Hidden metabolite	2	0.0182641	0.13101	2	4-Methylthio-2-oxobutanoic acid;4-Methylthio-2-oxobutanoate;2-Keto-4-methylthiobutyric acid;2-Oxo-4-methylthiobutanoate;2-Oxo-4-methylthiobutanoic acid	4-Methylthio-2-oxobutanoic acid
C02291	Yes	Detected metabolite	4	0.0374635	0.183966	4	L-Cystathionine	L-Cystathionine
C00155	Yes	Detected metabolite	3	0.02051	0.157174	3	L-Homocysteine;L-2-Amino-4-mercaptobutyric acid;Homocysteine	L-Homocysteine
C00581	No	Hidden metabolite	3	0.204223	0.202602	3	Guanidinoacetate;Guanidinoacetic acid;Glycocyamine;N-Amidinoglycine;Guanidoacetic acid	Guanidinoacetate
C00077	Yes	Detected metabolite	6	0.0402645	0.17825	6	L-Ornithine;(S)-2,5-Diaminovaleric acid;(S)-2,5-Diaminopentanoic acid;(S)-2,5-Diaminopentanoate	L-Ornithine
C00179	Yes	Detected metabolite	3	0.0112655	0.162202	3	Agmatine;(4-Aminobutyl) guanidine	Agmatine
C00334	Yes	Detected metabolite	3	0.0190693	0.190559	3	4-Aminobutanoate;4-Aminobutanoic acid;4-Aminobutyrate;4-Aminobutyric acid;gamma-Aminobutyric acid;GABA	4-Aminobutanoate
C00134	No	Hidden metabolite	3	0.00329798	0.152448	3	Putrescine;1,4-Butanediamine;1,4-Diaminobutane;Tetramethylenediamine;Butane-1,4-diamine	Putrescine
C05946	No	Hidden metabolite	3	0.0171216	0.184902	3	(4R)-4-Hydroxy-2-oxoglutarate;(R)-2-Hydroxy-4-oxopentanedioate;D-4-Hydroxy-2-oxoglutarate	(4R)-4-Hydroxy-2-oxoglutarate
C05947	Yes	Detected metabolite	4	0.00982771	0.162808	4	L-erythro-4-Hydroxyglutamate	L-erythro-4-Hydroxyglutamate
C03912	No	Hidden metabolite	2	0.0185707	0.190061	2	(S)-1-Pyrroline-5-carboxylate;L-1-Pyrroline-5-carboxylate;1-Pyrroline-5-carboxylate	(S)-1-Pyrroline-5-carboxylate
C03680	Yes	Detected metabolite	3	0.0291558	0.162808	3	4-Imidazolone-5-propanoate;4-Imidazolone-5-propionic acid;4,5-Dihydro-4-oxo-5-imidazolepropanoate	4-Imidazolone-5-propanoate
C00785	Yes	Detected metabolite	3	0.0147963	0.143705	3	Urocanate;Urocanic acid	Urocanate
C00135	Yes	Detected metabolite	3	0.0127266	0.136421	3	L-Histidine;(S)-alpha-Amino-1H-imidazole-4-propionic acid	L-Histidine
C05589	Yes	Detected metabolite	3	0.0167174	0.104107	3	L-Normetanephrine	L-Normetanephrine
C00547	Yes	Detected metabolite	5	0.0880568	0.115344	5	L-Noradrenaline;Noradrenaline;Norepinephrine;Arterenol;4-[(1R)-2-Amino-1-hydroxyethyl]-1,2-benzenediol	L-Noradrenaline
C00788	Yes	Detected metabolite	4	0.0134423	0.104356	4	L-Adrenaline;(R)-(-)-Adrenaline;(R)-(-)-Epinephrine;(R)-(-)-Epirenamine;(R)-(-)-Adnephrine;4-[(1R)-1-Hydroxy-2-(methylamino)ethyl]-1,2-benzenediol	L-Adrenaline
C05580	Yes	Detected metabolite	3	0.0162686	0.0952381	3	3,4-Dihydroxymandelate;3,4-Dihydroxymandelic acid;Dihydroxymandelic acid	3,4-Dihydroxymandelate
C05577	Yes	Detected metabolite	5	0.0351664	0.104707	5	3,4-Dihydroxymandelaldehyde;3,4-Dihydroxyphenylglycolaldehyde	3,4-Dihydroxymandelaldehyde
C05583	Yes	Detected metabolite	4	0.012288	0.0952797	4	3-Methoxy-4-hydroxyphenylglycolaldehyde	3-Methoxy-4-hydroxyphenylglycolaldehyde
C03758	No	Hidden metabolite	3	0.0864968	0.124643	3	Dopamine;4-(2-Aminoethyl)-1,2-benzenediol;4-(2-Aminoethyl)benzene-1,2-diol;3,4-Dihydroxyphenethylamine;2-(3,4-Dihydroxyphenyl)ethylamine	Dopamine
C04043	Yes	Detected metabolite	3	0.0169861	0.11168	3	3,4-Dihydroxyphenylacetaldehyde;Protocatechuatealdehyde	3,4-Dihydroxyphenylacetaldehyde
C05581	Yes	Detected metabolite	4	0.0572593	0.123373	4	3-Methoxy-4-hydroxyphenylacetaldehyde;(4-Hydroxy-3-methoxyphenyl)acetaldehyde;Homovanillin	3-Methoxy-4-hydroxyphenylacetaldehyde
C00386	Yes	Detected metabolite	4	0.0206578	0.156272	4	Carnosine;Nalpha-(beta-alanyl)-L-histidine	Carnosine
C00222	Yes	Detected metabolite	3	0.0104839	0.167306	3	3-Oxopropanoate;Malonate semialdehyde	3-Oxopropanoate
C00099	Yes	Detected metabolite	6	0.0864729	0.181364	6	beta-Alanine;3-Aminopropionic acid;3-Aminopropanoate	beta-Alanine
C00097	Yes	Detected metabolite	6	0.035637	0.197464	6	L-Cysteine;L-2-Amino-3-mercaptopropionic acid	L-Cysteine
C00051	No	Hidden metabolite	5	0.0134395	0.209213	5	Glutathione;5-L-Glutamyl-L-cysteinylglycine;N-(N-gamma-L-Glutamyl-L-cysteinyl)glycine;gamma-L-Glutamyl-L-cysteinyl-glycine;GSH;Reduced glutathione	Glutathione
C00669	No	Hidden metabolite	4	0.00914326	0.201479	4	gamma-L-Glutamyl-L-cysteine;L-gamma-Glutamylcysteine;5-L-Glutamyl-L-cysteine;gamma-Glutamylcysteine	gamma-L-Glutamyl-L-cysteine
C00064	Yes	Detected metabolite	5	0.259046	0.220648	5	L-Glutamine;L-2-Aminoglutaramic acid	L-Glutamine
C00352	No	Hidden metabolite	3	0.251555	0.200368	3	D-Glucosamine 6-phosphate;D-Glucosamine phosphate	D-Glucosamine 6-phosphate
C00577	Yes	Detected metabolite	5	0.0904171	0.173429	5	D-Glyceraldehyde	D-Glyceraldehyde
C05401	Yes	Detected metabolite	3	0.0277991	0.137193	3	3-beta-D-Galactosyl-sn-glycerol;Galactosylglycerol	3-beta-D-Galactosyl-sn-glycerol
C00093	No	Hidden metabolite	2	0.000299519	0.137021	2	sn-Glycerol 3-phosphate;Glycerophosphoric acid;D-Glycerol 1-phosphate	sn-Glycerol 3-phosphate
C00137	Yes	Detected metabolite	5	0.0121389	0.128918	5	myo-Inositol;D-myo-Inositol;1D-myo-Inositol;L-myo-Inositol;1L-myo-Inositol;meso-Inositol;Inositol;Dambose;Cyclohexitol;Meat sugar;Bios I	myo-Inositol
C00092	No	Hidden metabolite	2	0.000233938	0.114979	2	D-Glucose 6-phosphate;Glucose 6-phosphate;Robison ester	D-Glucose 6-phosphate
C00184	Yes	Detected metabolite	2	0.00321781	0.151705	2	Glycerone;Dihydroxyacetone;1,3-Dihydroxyacetone;1,3-Dihydroxy-2-propanone;1,3-Dihydroxypropan-2-one	Glycerone
C00168	Yes	Detected metabolite	5	0.0752461	0.199451	5	Hydroxypyruvate;Hydroxypyruvic acid;3-Hydroxypyruvate;3-Hydroxypyruvic acid	Hydroxypyruvate
C00101	No	Hidden metabolite	5	0.056929	0.200368	5	Tetrahydrofolate;5,6,7,8-Tetrahydrofolate;Tetrahydrofolic acid;THF;(6S)-Tetrahydrofolate;(6S)-Tetrahydrofolic acid;(6S)-THFA	Tetrahydrofolate
C00415	No	Hidden metabolite	3	0.0182641	0.172742	3	Dihydrofolate;Dihydrofolic acid;7,8-Dihydrofolate;7,8-Dihydrofolic acid;7,8-Dihydropteroylglutamate	Dihydrofolate
C00931	Yes	Detected metabolite	2	0.00833713	0.164902	2	Porphobilinogen	Porphobilinogen
C00149	Yes	Detected metabolite	5	0.0190976	0.191733	5	(S)-Malate;L-Malate;L-Apple acid;L-Malic acid;L-2-Hydroxybutanedioic acid;Malate;Malic acid	(S)-Malate
C00073	Yes	Detected metabolite	4	0.0367142	0.150241	4	L-Methionine;Methionine;L-2-Amino-4methylthiobutyric acid	L-Methionine
C05382	No	Hidden metabolite	4	0.0267527	0.158086	4	Sedoheptulose 7-phosphate;D-Sedoheptulose 7-phosphate;D-altro-Heptulose 7-phosphate;altro-Heptulose 7-phosphate	Sedoheptulose 7-phosphate
C00369	No	Hidden metabolite	2	9.2483e-05	0.126157	2	Starch;Glycogen	Starch
C00499	Yes	Detected metabolite	3	0.0557958	0.147099	3	Allantoate;Allantoic acid	Allantoate
C04281	Yes	Detected metabolite	3	0.0029888	0.152448	3	L-1-Pyrroline-3-hydroxy-5-carboxylate;3-Hydroxy-L-1-pyrroline-5-carboxylate;(3R,5S)-1-Pyrroline-3-hydroxy-5-carboxylate	L-1-Pyrroline-3-hydroxy-5-carboxylate
C00148	Yes	Detected metabolite	3	0.0111471	0.161721	3	L-Proline;2-Pyrrolidinecarboxylic acid	L-Proline
C01152	Yes	Detected metabolite	3	0.0183063	0.134901	3	N(pi)-Methyl-L-histidine;N-pros-Methyl-L-histidine;3-Methylhistidine;1-Methylhistidine	N(pi)-Methyl-L-histidine
C05576	Yes	Detected metabolite	3	0.00201173	0.0953214	3	3,4-Dihydroxyphenylethyleneglycol	3,4-Dihydroxyphenylethyleneglycol
C01161	Yes	Detected metabolite	3	0.00509259	0.101774	3	3,4-Dihydroxyphenylacetate;3,4-Dihydroxyphenylacetic acid;Homoprotocatechuate	3,4-Dihydroxyphenylacetate
nHILIC_87.0087_4.4		Peak	2	0.00448917	0.17454	2
nHILIC_146.0458_7.6		Peak	2	0.00930306	0.190061	2
pRPLC_181.0718_3.1		Peak	9	0.0277378	0.146999	9
pRPLC_181.0719_3.4		Peak	9	0.0277378	0.146999	9
nHILIC_179.0561_7.6		Peak	9	0.0277378	0.146999	9
nHILIC_74.0246_9.6		Peak	1	0	0.187446	1
nHILIC_88.0403_8.9		Peak	2	0.00350211	0.164902	2
nHILIC_132.0302_8.3		Peak	2	0.00243604	0.175665	2
pHILIC_175.1188_15.1		Peak	1	0	0.161004	1
pHILIC_147.0763_9.7		Peak	1	0	0.180913	1
nHILIC_104.0352_9.7		Peak	2	0	0.179424	2
pHILIC_150.0581_7		Peak	1	0	0.130695	1
pHILIC_133.097_16.1		Peak	1	0	0.151389	1
nHILIC_120.0124_7.6		Peak	1	0	0.165026	1
nHILIC_149.0455_8.2		Peak	1	0	0.113188	1
nHILIC_154.0621_9.6		Peak	1	0	0.12011	1
nHILIC_114.0559_7.8		Peak	1	0	0.139297	1
nHILIC_133.0142_10.4		Peak	1	0	0.161004	1
nHILIC_131.0461_9.7		Peak	1	0	0.14952	1
pRPLC_153.0658_1.7		Peak	1	0	0.13591	1
nHILIC_191.0197_11.2		Peak	2	0	0.153197	2
nHILIC_103.0036_7.7		Peak	3	0.00818345	0.168731	3
nRPLC_165.092_7		Peak	1	0	0.139654	1
nHILIC_89.0243_5.8		Peak	3	0.0413693	0.171924	3
pHILIC_179.0484_7.4		Peak	2	0.0111992	0.170846	2
nHILIC_177.0404_7.8		Peak	2	0.0111992	0.170846	2
nHILIC_177.0339_6.7		Peak	2	0.0111992	0.170846	2
nHILIC_195.051_8.7		Peak	1	0	0.127709	1
nHILIC_105.0192_7.8		Peak	1	0	0.156947	1
pHILIC_132.0766_9		Peak	2	0.162232	0.15483	2
nHILIC_174.0883_10.1		Peak	1	0	0.161243	1
pHILIC_180.0865_7.4		Peak	1	0	0.143421	1
pHILIC_104.0705_8.1		Peak	1	0	0.160176	1
pRPLC_277.0384_5.1		Peak	1	0	0.121381	1
pRPLC_283.1541_8.3		Peak	1	0	0.113779	1
nHILIC_261.0725_10.7		Peak	2	0.0033057	0.148603	2
nHILIC_130.0509_8.8		Peak	3	0.00900303	0.177959	3
pHILIC_175.1076_8.9		Peak	1	0	0.131722	1
nHILIC_173.0567_7.6		Peak	1	0	0.160648	1
nHILIC_129.0192_7.6		Peak	1	0	0.117774	1
nHILIC_485.1492_3.9		Peak	2	7.75095e-05	0.114196	2
nHILIC_157.0366_6.1		Peak	1	0	0.128311	1
pHILIC_152.0705_7.6		Peak	2	0.0336844	0.120176	2
pHILIC_139.0501_7.6		Peak	1	0	0.125721	1
pHILIC_166.0861_6.2		Peak	2	2.1139e-05	0.0948238	2
nHILIC_181.0717_3.5		Peak	2	0.000848811	0.126744	2
nHILIC_349.0752_8.5		Peak	1	0	0.128689	1
nHILIC_144.0302_7.2		Peak	2	0.000650376	0.14952	2
nHILIC_160.0251_10.4		Peak	1	0	0.14952	1
pHILIC_170.0923_8.5		Peak	1	0	0.118931	1
nHILIC_168.0778_10.2		Peak	1	0	0.118931	1
nHILIC_167.0349_1.3		Peak	2	0.000770868	0.0953214	2
nHILIC_128.0352_7.6		Peak	2	0.00484593	0.164902	2
nHILIC_245.0431_7.2		Peak	1	0	0.120375	1
nHILIC_221.0665_7.7		Peak	1	0	0.155492	1
nHILIC_147.0297_10.2		Peak	1	0	0.143045	1
nHILIC_116.0352_7.5		Peak	1	0	0.1582	1
pHILIC_157.0607_8.3		Peak	1	0	0.140103	1
nRPLC_151.04_2.3		Peak	2	0.0022884	0.101395	2
nHILIC_253.0927_3.2		Peak	1	0	0.120709	1
nHILIC_183.0294_2.1		Peak	1	0	0.0869912	1
nRPLC_165.0556_2.3		Peak	2	0.0105263	0.11066	2
nRPLC_165.0557_3.2		Peak	1	0	0.109879	1
nHILIC_181.0506_6.2		Peak	2	0.00802223	0.101727	2
nHILIC_179.0348_2.2		Peak	1	0	0.0805617	1
pHILIC_147.1128_11.2		Peak	1	0	0.133415	1
pRPLC_180.0654_2		Peak	1	0	0.104008	1
C05125	No	Hidden metabolite	2	0.0272693	0.171518	2	2-(alpha-Hydroxyethyl)thiamine diphosphate;2-Hydroxyethyl-ThPP	2-(alpha-Hydroxyethyl)thiamine diphosphate
C00186	Yes	Detected metabolite	2	0.0448425	0.186166	2	(S)-Lactate;L-Lactate;L-Lactic acid	(S)-Lactate
C00158	Yes	Detected metabolite	5	0.0180861	0.167435	5	Citrate;Citric acid;2-Hydroxy-1,2,3-propanetricarboxylic acid;2-Hydroxytricarballylic acid	Citrate
C00121	Yes	Detected metabolite	2	0.00917431	0.12756	2	D-Ribose	D-Ribose
C01236	No	Hidden metabolite	2	0.0103478	0.140554	2	D-Glucono-1,5-lactone 6-phosphate;6-Phospho-D-glucono-1,5-lactone	D-Glucono-1,5-lactone 6-phosphate
C00198	Yes	Detected metabolite	4	0.032074	0.157061	4	D-Glucono-1,5-lactone;Gluconic lactone;Gluconic acid lactone;1,5-Gluconolactone;delta-Gluconolactone;D-Gluconolactone;Gluconolactone	D-Glucono-1,5-lactone
C00275	No	Hidden metabolite	2	0.0129539	0.158086	2	D-Mannose 6-phosphate	D-Mannose 6-phosphate
C00492	Yes	Detected metabolite	3	0.0079855	0.12704	3	Raffinose;Melitose;Melitriose;Gossypose;6G-alpha-D-galactosylsucrose	Raffinose
C05400	No	Hidden metabolite	2	0.000224677	0.127859	2	Epimelibiose;6-O-(alpha-D-Galactopyranosyl)-D-mannopyranose	Epimelibiose
C05399	No	Hidden metabolite	2	0.000386541	0.128386	2	Melibiitol;6-O-alpha-D-Galactosyl-D-glucitol	Melibiitol
C00243	No	Hidden metabolite	2	0.000233455	0.128918	2	Lactose;1-beta-D-Galactopyranosyl-4-D-glucopyranose;beta-D-Gal-(1->4)-D-Glc;Milk sugar	Lactose
C00984	Yes	Detected metabolite	4	1.40926e-05	0.129762	4	alpha-D-Galactose	alpha-D-Galactose
C00383	Yes	Detected metabolite	2	0.00189637	0.150657	2	Malonate;Malonic acid;Propanedioic acid	Malonate
C00020	No	Hidden metabolite	2	0.00297463	0.190726	2	AMP;Adenosine 5'-monophosphate;Adenylic acid;Adenylate;5'-AMP;5'-Adenylic acid;5'-Adenosine monophosphate;Adenosine 5'-phosphate	AMP
C00402	Yes	Detected metabolite	2	0.000828144	0.164033	2	D-Aspartate;D-Aspartic acid	D-Aspartate
C00041	Yes	Detected metabolite	2	0.00639686	0.17454	2	L-Alanine;L-2-Aminopropionic acid;L-alpha-Alanine	L-Alanine
C00940	Yes	Detected metabolite	2	0.00625843	0.167563	2	2-Oxoglutaramate;2-Oxoglutaramic acid;alpha-Ketoglutaramate;2-Ketoglutaramate	2-Oxoglutaramate
C15606	Yes	Detected metabolite	2	0.00917431	0.116019	2	1,2-Dihydroxy-5-(methylthio)pent-1-en-3-one	1,2-Dihydroxy-5-(methylthio)pent-1-en-3-one
C00300	Yes	Detected metabolite	2	0.16925	0.175523	2	Creatine;alpha-Methylguanidino acetic acid;Methylglycocyamine	Creatine
C00555	No	Hidden metabolite	2	0.00320454	0.165653	2	4-Aminobutyraldehyde;4-Aminobutanal	4-Aminobutyraldehyde
C05938	Yes	Detected metabolite	2	0.00225674	0.166032	2	L-4-Hydroxyglutamate semialdehyde	L-4-Hydroxyglutamate semialdehyde
C01165	Yes	Detected metabolite	3	0.0302894	0.198002	3	L-Glutamate 5-semialdehyde;L-Glutamate gamma-semialdehyde	L-Glutamate 5-semialdehyde
C01044	Yes	Detected metabolite	2	0.00917431	0.175665	2	N-Formyl-L-aspartate	N-Formyl-L-aspartate
C05588	No	Hidden metabolite	2	0.000223368	0.095072	2	L-Metanephrine	L-Metanephrine
C05587	Yes	Detected metabolite	3	0.156365	0.138589	3	3-Methoxytyramine	3-Methoxytyramine
C05665	Yes	Detected metabolite	2	0.00917431	0.153846	2	3-Aminopropanal;beta-Aminopropion aldehyde	3-Aminopropanal
C01419	Yes	Detected metabolite	6	0.0573282	0.196929	6	Cys-Gly;L-Cysteinylglycine	Cys-Gly
C01879	Yes	Detected metabolite	4	0.0130539	0.194817	4	Pidolic acid;5-Oxoproline;Pyroglutamic acid;5-Pyrrolidone-2-carboxylic acid;Pyroglutamate;5-Oxo-L-proline;L-Pyroglutamic acid;L-5-Pyrrolidone-2-carboxylic acid	Pidolic acid
C02336	Yes	Detected metabolite	4	0.0390211	0.160412	4	beta-D-Fructose;beta-Fruit sugar;beta-D-arabino-Hexulose;beta-Levulose;Fructose	beta-D-Fructose
C00329	Yes	Detected metabolite	2	0.00917431	0.167306	2	D-Glucosamine;Chitosamine;2-Amino-2-deoxy-D-glucose	D-Glucosamine
C00116	No	Hidden metabolite	3	0.0355293	0.152235	3	Glycerol;Glycerin;1,2,3-Trihydroxypropane;1,2,3-Propanetriol	Glycerol
C04006	No	Hidden metabolite	2	8.45559e-05	0.114676	2	1D-myo-Inositol 3-phosphate;D-myo-Inositol 3-phosphate;myo-Inositol 3-phosphate;Inositol 3-phosphate;1D-myo-Inositol 3-monophosphate;D-myo-Inositol 3-monophosphate;myo-Inositol 3-monophosphate;Inositol 3-monophosphate;1L-myo-Inositol 1-phosphate;L-myo-Inositol 1-phosphate	1D-myo-Inositol 3-phosphate
C00111	No	Hidden metabolite	4	0.00644606	0.148907	4	Glycerone phosphate;Dihydroxyacetone phosphate;3-Hydroxy-2-oxopropyl phosphate	Glycerone phosphate
C00048	No	Hidden metabolite	4	0.0460575	0.207619	4	Glyoxylate;Glyoxalate;Glyoxylic acid	Glyoxylate
C00378	Yes	Detected metabolite	2	0.00917431	0.128311	2	Thiamine;Thiamin;Vitamin B1;Aneurin;Antiberiberi factor	Thiamine
C00921	Yes	Detected metabolite	2	0.00917431	0.147596	2	Dihydropteroate;7,8-Dihydropteroate	Dihydropteroate
C00430	Yes	Detected metabolite	3	0.0227476	0.19207	3	5-Aminolevulinate;5-Amino-4-oxopentanoate;5-Amino-4-oxovaleric acid	5-Aminolevulinate
C00011	No	Hidden metabolite	3	0.0105419	0.203738	3	CO2;Carbon dioxide	CO2
C00152	Yes	Detected metabolite	2	0.00917431	0.175665	2	L-Asparagine;2-Aminosuccinamic acid	L-Asparagine
C02430	No	Hidden metabolite	2	0.0335804	0.169123	2	L-Methionyl-tRNA;L-Methionyl-tRNA(Met)	L-Methionyl-tRNA
C00231	No	Hidden metabolite	4	0.0118172	0.161961	4	D-Xylulose 5-phosphate	D-Xylulose 5-phosphate
C02076	Yes	Detected metabolite	2	0.00917431	0.136763	2	Sedoheptulose;D-altro-Heptulose;D-Sedoheptulose;Volemulose	Sedoheptulose
C00122	No	Hidden metabolite	3	0.00561565	0.176233	3	Fumarate;Fumaric acid;trans-Butenedioic acid	Fumarate
C00031	Yes	Detected metabolite	7	0.0141866	0.129531	7	D-Glucose;Grape sugar;Dextrose;Glucose;D-Glucopyranose	D-Glucose
C01697	Yes	Detected metabolite	2	0.000662354	0.118672	2	Galactitol;Dulcitol;Dulcose	Galactitol
C00086	No	Hidden metabolite	2	0.0617992	0.165906	2	Urea;Carbamide	Urea
C00603	Yes	Detected metabolite	2	0.0407025	0.132282	2	(-)-Ureidoglycolate;(S)-Ureidoglycolate	(-)-Ureidoglycolate
C00740	Yes	Detected metabolite	2	0	0.179424	2	D-Serine	D-Serine
C03508	Yes	Detected metabolite	2	0.00917431	0.187769	2	L-2-Amino-3-oxobutanoic acid;L-2-Amino-3-oxobutanoate;L-2-Amino-acetoacetate;(S)-2-Amino-3-oxobutanoic acid	L-2-Amino-3-oxobutanoic acid
C01157	Yes	Detected metabolite	3	0.00338565	0.15483	3	Hydroxyproline;L-Hydroxyproline;trans-4-Hydroxy-L-proline	Hydroxyproline
C00439	Yes	Detected metabolite	3	0.0457781	0.191228	3	N-Formimino-L-glutamate;N-Formimidoyl-L-glutamate	N-Formimino-L-glutamate
C01262	No	Hidden metabolite	3	0.0272693	0.155381	3	beta-Alanyl-N(pi)-methyl-L-histidine;Anserine	beta-Alanyl-N(pi)-methyl-L-histidine
C05584	Yes	Detected metabolite	3	0.00958793	0.0875854	3	3-Methoxy-4-hydroxymandelate;Vanillylmandelic acid	3-Methoxy-4-hydroxymandelate
C05594	Yes	Detected metabolite	2	0.00275768	0.101395	2	3-Methoxy-4-hydroxyphenylethyleneglycol	3-Methoxy-4-hydroxyphenylethyleneglycol
C05582	Yes	Detected metabolite	3	0.0226036	0.111509	3	Homovanillate;Homovanillic acid;3-Methoxy-4-hydroxyphenylacetate	Homovanillate
C01146	Yes	Detected metabolite	2	0	0.166794	2	2-Hydroxy-3-oxopropanoate;Tartronate semialdehyde	2-Hydroxy-3-oxopropanoate
C02630	Yes	Detected metabolite	2	0.00917431	0.166794	2	2-Hydroxyglutarate;alpha-Hydroxyglutarate	2-Hydroxyglutarate
C00490	Yes	Detected metabolite	2	0.00917431	0.133415	2	Itaconate;Itaconic acid;Methylenesuccinic acid	Itaconate

## Sheet: Module edge
Supplemental Data S8. Pathway enrichment results for metabolic peaks connected with the biological exposome.
from	to	mz.error	Adduct	class
C00068	C05125	0		c-c
C00022	C05125	0		c-c
C00022	C00024	0		c-c
C00022	C00186	0		c-c
C00022	C00074	0		c-c
C00074	C00631	0		c-c
C00118	C05345	0		c-c
C05345	C00668	0		c-c
C05345	C01172	0		c-c
C00668	C01172	0		c-c
C01172	C00221	0		c-c
C00668	C00267	0		c-c
C00221	C00267	0		c-c
C00022	C00036	0		c-c
C00074	C00036	0		c-c
C00026	C00311	0		c-c
C00022	C00149	0		c-c
C00036	C00149	0		c-c
C00311	C00417	0		c-c
C00024	C00158	0		c-c
C00036	C00158	0		c-c
C00311	C00158	0		c-c
C00417	C00158	0		c-c
C00118	C00117	0		c-c
C00117	C00121	0		c-c
C05345	C05382	0		c-c
C00117	C05382	0		c-c
C00117	C00199	0		c-c
C00199	C00345	0		c-c
C01172	C01236	0		c-c
C00345	C01236	0		c-c
C00345	C00257	0		c-c
C00257	C00198	0		c-c
C00631	C00258	0		c-c
C00267	C00794	0		c-c
C05345	C00095	0		c-c
C00794	C00095	0		c-c
C05345	C00275	0		c-c
C00159	C00275	0		c-c
C00095	C01094	0		c-c
C00118	C00577	0		c-c
C00258	C00577	0		c-c
C01094	C00577	0		c-c
C00095	C00089	0		c-c
C01613	C00492	0		c-c
C00089	C00492	0		c-c
C05404	C05402	0		c-c
C01613	C00124	0		c-c
C05404	C00124	0		c-c
C05402	C00124	0		c-c
C00124	C05401	0		c-c
C00159	C05400	0		c-c
C00124	C05400	0		c-c
C00794	C05399	0		c-c
C00124	C05399	0		c-c
C00124	C01235	0		c-c
C00267	C00243	0		c-c
C00124	C00243	0		c-c
C00124	C00984	0		c-c
C01235	C00137	0		c-c
C00024	C00083	0		c-c
C00083	C00383	0		c-c
C00026	C00025	0		c-c
C00037	C00025	0		c-c
C00062	C03406	0		c-c
C00062	C00327	0		c-c
C03406	C00327	0		c-c
C00036	C00049	0		c-c
C00025	C00049	0		c-c
C03406	C00049	0		c-c
C00327	C00169	0		c-c
C00062	C00077	0		c-c
C00437	C00077	0		c-c
C00327	C00077	0		c-c
C00037	C00014	0		c-c
C00025	C00014	0		c-c
C00169	C00014	0		c-c
C00025	C00064	0		c-c
C00169	C00064	0		c-c
C00014	C00064	0		c-c
C00049	C03794	0		c-c
C00014	C00020	0		c-c
C03794	C00020	0		c-c
C00036	C00402	0		c-c
C00022	C00041	0		c-c
C00025	C00334	0		c-c
C00026	C00940	0		c-c
C00025	C03912	0		c-c
C00022	C00065	0		c-c
C00037	C00065	0		c-c
C00014	C00065	0		c-c
C00037	C00581	0		c-c
C00062	C00581	0		c-c
C00065	C02291	0		c-c
C00037	C00143	0		c-c
C00065	C00143	0		c-c
C00037	C00101	0		c-c
C00014	C00101	0		c-c
C00143	C00101	0		c-c
C01180	C15606	0		c-c
C02291	C00155	0		c-c
C01180	C00073	0		c-c
C00155	C00073	0		c-c
C00022	C00097	0		c-c
C00065	C00097	0		c-c
C02291	C00097	0		c-c
C00581	C00300	0		c-c
C00062	C00179	0		c-c
C00077	C00134	0		c-c
C00179	C00134	0		c-c
C00334	C00555	0		c-c
C00134	C00555	0		c-c
C00022	C05946	0		c-c
C05946	C05947	0		c-c
C05947	C05938	0		c-c
C05947	C04281	0		c-c
C03912	C00148	0		c-c
C00025	C01165	0		c-c
C00077	C01165	0		c-c
C03680	C00785	0		c-c
C00785	C00135	0		c-c
C00135	C00386	0		c-c
C00049	C01044	0		c-c
C05589	C05583	0		c-c
C05589	C00547	0		c-c
C00547	C00788	0		c-c
C00547	C05577	0		c-c
C00788	C05577	0		c-c
C05580	C05577	0		c-c
C05577	C05576	0		c-c
C05583	C05588	0		c-c
C00788	C05588	0		c-c
C00547	C03758	0		c-c
C03758	C04043	0		c-c
C04043	C01161	0		c-c
C03758	C05587	0		c-c
C05581	C05587	0		c-c
C00024	C00222	0		c-c
C00049	C00099	0		c-c
C00386	C00099	0		c-c
C00222	C00099	0		c-c
C00099	C05665	0		c-c
C00037	C00051	0		c-c
C00025	C00051	0		c-c
C00025	C00669	0		c-c
C00097	C00669	0		c-c
C00051	C00669	0		c-c
C00037	C01419	0		c-c
C00097	C01419	0		c-c
C00051	C01419	0		c-c
C00025	C01879	0		c-c
C00051	C01879	0		c-c
C00669	C01879	0		c-c
C00267	C00369	0		c-c
C05345	C00352	0		c-c
C00064	C00352	0		c-c
C05345	C02336	0		c-c
C00352	C00329	0		c-c
C00577	C00116	0		c-c
C05401	C00116	0		c-c
C00093	C00116	0		c-c
C00137	C04006	0		c-c
C00092	C04006	0		c-c
C00118	C00111	0		c-c
C01094	C00111	0		c-c
C00093	C00111	0		c-c
C00184	C00111	0		c-c
C00258	C00168	0		c-c
C00065	C00168	0		c-c
C00026	C00048	0		c-c
C00037	C00048	0		c-c
C05946	C00048	0		c-c
C00168	C00048	0		c-c
C00143	C00415	0		c-c
C00101	C00415	0		c-c
C00068	C00378	0		c-c
C00415	C00921	0		c-c
C00037	C00430	0		c-c
C00931	C00430	0		c-c
C00149	C00011	0		c-c
C00037	C00011	0		c-c
C00169	C00011	0		c-c
C00049	C00152	0		c-c
C00101	C02430	0		c-c
C00073	C02430	0		c-c
C00118	C00231	0		c-c
C05345	C00231	0		c-c
C05382	C00231	0		c-c
C00199	C00231	0		c-c
C05382	C02076	0		c-c
C00149	C00122	0		c-c
C03406	C00122	0		c-c
C03794	C00122	0		c-c
C00089	C00031	0		c-c
C05402	C00031	0		c-c
C00092	C00031	0		c-c
C00369	C00031	0		c-c
C00124	C01697	0		c-c
C00062	C00086	0		c-c
C00499	C00086	0		c-c
C00499	C00603	0		c-c
C00065	C00740	0		c-c
C00037	C03508	0		c-c
C04281	C01157	0		c-c
C00148	C01157	0		c-c
C00025	C00439	0		c-c
C03680	C00439	0		c-c
C00386	C01262	0		c-c
C01152	C01262	0		c-c
C00099	C01262	0		c-c
C05583	C05584	0		c-c
C05580	C05584	0		c-c
C05576	C05594	0		c-c
C01161	C05582	0		c-c
C05581	C05582	0		c-c
C00168	C01146	0		c-c
C00026	C02630	0		c-c
C00417	C00490	0		c-c
nHILIC_87.0087_4.4	C00022	1.20251	M-H	p-c
nHILIC_146.0458_7.6	C00025	1.168	M-H	p-c
pRPLC_181.0718_3.1	C00031	1.46691	M+H	p-c
pRPLC_181.0719_3.4	C00031	1.71691	M+H	p-c
nHILIC_179.0561_7.6	C00031	1.34209	M-H	p-c
nHILIC_74.0246_9.6	C00037	0.991495	M-H	p-c
nHILIC_88.0403_8.9	C00041	1.11632	M-H	p-c
nHILIC_132.0302_8.3	C00049	1.29317	M-H	p-c
pHILIC_175.1188_15.1	C00062	1.75198	M+H	p-c
pHILIC_147.0763_9.7	C00064	1.6682	M+H	p-c
nHILIC_104.0352_9.7	C00065	1.07975	M-H	p-c
pHILIC_150.0581_7	C00073	1.93596	M+H	p-c
pHILIC_133.097_16.1	C00077	1.7568	M+H	p-c
pRPLC_181.0718_3.1	C00095	1.46691	M+H	p-c
pRPLC_181.0719_3.4	C00095	1.71691	M+H	p-c
nHILIC_179.0561_7.6	C00095	1.34209	M-H	p-c
nHILIC_120.0124_7.6	C00097	1.18957	M-H	p-c
nHILIC_88.0403_8.9	C00099	1.11632	M-H	p-c
nHILIC_149.0455_8.2	C00121	1.25384	M-H	p-c
pRPLC_181.0718_3.1	C00124	1.46691	M+H	p-c
pRPLC_181.0719_3.4	C00124	1.71691	M+H	p-c
nHILIC_179.0561_7.6	C00124	1.34209	M-H	p-c
nHILIC_154.0621_9.6	C00135	1.12113	M-H	p-c
pRPLC_181.0718_3.1	C00137	1.46691	M+H	p-c
pRPLC_181.0719_3.4	C00137	1.71691	M+H	p-c
nHILIC_179.0561_7.6	C00137	1.34209	M-H	p-c
nHILIC_114.0559_7.8	C00148	0.991145	M-H	p-c
nHILIC_133.0142_10.4	C00149	1.25419	M-H	p-c
nHILIC_131.0461_9.7	C00152	1.08215	M-H	p-c
pRPLC_153.0658_1.7	C00155	9.93355	M+NH4	p-c
nHILIC_191.0197_11.2	C00158	1.30586	M-H	p-c
pRPLC_181.0718_3.1	C00159	1.46691	M+H	p-c
pRPLC_181.0719_3.4	C00159	1.71691	M+H	p-c
nHILIC_179.0561_7.6	C00159	1.34209	M-H	p-c
nHILIC_103.0036_7.7	C00168	1.16594	M-H	p-c
nRPLC_165.092_7	C00179	3.25196	M+Cl	p-c
nHILIC_89.0243_5.8	C00184	1.07734	M-H	p-c
nHILIC_89.0243_5.8	C00186	1.07734	M-H	p-c
pHILIC_179.0484_7.4	C00198	17.9079	M+H	p-c
nHILIC_177.0404_7.8	C00198	1.21726	M-H	p-c
nHILIC_177.0339_6.7	C00198	15.0327	M-H	p-c
pRPLC_181.0718_3.1	C00221	1.46691	M+H	p-c
pRPLC_181.0719_3.4	C00221	1.71691	M+H	p-c
nHILIC_179.0561_7.6	C00221	1.34209	M-H	p-c
nHILIC_87.0087_4.4	C00222	1.20251	M-H	p-c
nHILIC_195.051_8.7	C00257	1.30551	M-H	p-c
nHILIC_105.0192_7.8	C00258	1.04076	M-H	p-c
pRPLC_181.0718_3.1	C00267	1.46691	M+H	p-c
pRPLC_181.0719_3.4	C00267	1.71691	M+H	p-c
nHILIC_179.0561_7.6	C00267	1.34209	M-H	p-c
pHILIC_132.0766_9	C00300	1.75404	M+H	p-c
nHILIC_191.0197_11.2	C00311	1.30586	M-H	p-c
nHILIC_174.0883_10.1	C00327	1.08421	M-H	p-c
pHILIC_180.0865_7.4	C00329	1.74411	M+H	p-c
pHILIC_104.0705_8.1	C00334	1.63403	M+H	p-c
pRPLC_277.0384_5.1	C00345	14.853	M+H	p-c
pRPLC_283.1541_8.3	C00378	18.5473	M+NH4	p-c
nHILIC_103.0036_7.7	C00383	1.16594	M-H	p-c
nHILIC_261.0725_10.7	C00386	7.35777	M+Cl	p-c
nHILIC_132.0302_8.3	C00402	1.29317	M-H	p-c
nHILIC_130.0509_8.8	C00430	1.20457	M-H	p-c
pHILIC_175.1076_8.9	C00437	1.66855	M+H	p-c
nHILIC_173.0567_7.6	C00439	1.1704	M-H	p-c
nHILIC_129.0192_7.6	C00490	1.04076	M-H	p-c
nHILIC_485.1492_3.9	C00492	2.97941	M-H-H2O	p-c
nHILIC_157.0366_6.1	C00499	1.08732	M-H-H2O	p-c
pHILIC_152.0705_7.6	C00547	1.63403	M+H-H2O	p-c
nHILIC_89.0243_5.8	C00577	1.07734	M-H	p-c
pHILIC_152.0705_7.6	C00603	8.42281	M+NH4	p-c
nHILIC_104.0352_9.7	C00740	1.07975	M-H	p-c
pHILIC_139.0501_7.6	C00785	1.63127	M+H	p-c
pHILIC_166.0861_6.2	C00788	1.75921	M+H-H2O	p-c
nHILIC_181.0717_3.5	C00794	1.21691	M-H	p-c
nHILIC_349.0752_8.5	C00921	15.9778	M+Cl	p-c
nHILIC_261.0725_10.7	C00931	20.7257	M+Cl	p-c
nHILIC_144.0302_7.2	C00940	1.29317	M-H	p-c
pRPLC_181.0718_3.1	C00984	1.46691	M+H	p-c
pRPLC_181.0719_3.4	C00984	1.71691	M+H	p-c
nHILIC_179.0561_7.6	C00984	1.34209	M-H	p-c
nHILIC_160.0251_10.4	C01044	1.2566	M-H	p-c
nHILIC_103.0036_7.7	C01146	1.16594	M-H	p-c
pHILIC_170.0923_8.5	C01152	1.62921	M+H	p-c
nHILIC_168.0778_10.2	C01152	1.24596	M-H	p-c
nHILIC_130.0509_8.8	C01157	1.20457	M-H	p-c
nHILIC_167.0349_1.3	C01161	1.16559	M-H	p-c
nHILIC_130.0509_8.8	C01165	1.20457	M-H	p-c
pHILIC_179.0484_7.4	C01419	1.59495	M+H	p-c
nHILIC_177.0404_7.8	C01419	17.5302	M-H	p-c
nHILIC_177.0339_6.7	C01419	1.28023	M-H	p-c
nHILIC_181.0717_3.5	C01697	1.21691	M-H	p-c
nHILIC_128.0352_7.6	C01879	1.07975	M-H	p-c
nHILIC_245.0431_7.2	C02076	0.73595	M+Cl	p-c
nHILIC_221.0665_7.7	C02291	17.2433	M-H	p-c
pRPLC_181.0718_3.1	C02336	1.46691	M+H	p-c
pRPLC_181.0719_3.4	C02336	1.71691	M+H	p-c
nHILIC_179.0561_7.6	C02336	1.34209	M-H	p-c
nHILIC_147.0297_10.2	C02630	0.879012	M-H	p-c
nHILIC_116.0352_7.5	C03508	1.07975	M-H	p-c
pHILIC_157.0607_8.3	C03680	1.54302	M+H	p-c
nRPLC_151.04_2.3	C04043	1.20216	M-H	p-c
nHILIC_128.0352_7.6	C04281	1.07975	M-H	p-c
nHILIC_253.0927_3.2	C05401	0.893413	M-H	p-c
nHILIC_485.1492_3.9	C05404	2.97941	M-H-H2O	p-c
nRPLC_151.04_2.3	C05576	1.20216	M-H-H2O	p-c
nHILIC_167.0349_1.3	C05577	1.16559	M-H	p-c
nHILIC_183.0294_2.1	C05580	0.129013	M-H	p-c
nRPLC_165.0556_2.3	C05581	1.07699	M-H	p-c
nRPLC_165.0557_3.2	C05581	1.32699	M-H	p-c
nHILIC_181.0506_6.2	C05582	1.29041	M-H	p-c
nHILIC_181.0506_6.2	C05583	1.29041	M-H	p-c
nHILIC_179.0348_2.2	C05584	0.915588	M-H-H2O	p-c
pHILIC_132.0766_9	C05587	11.8109	M+H-2H2O	p-c
pHILIC_166.0861_6.2	C05589	1.75921	M+H-H2O	p-c
nRPLC_165.0556_2.3	C05594	1.07699	M-H-H2O	p-c
pHILIC_147.1128_11.2	C05665	1.38197	2M+H	p-c
nHILIC_146.0458_7.6	C05938	1.168	M-H	p-c
nHILIC_144.0302_7.2	C05947	1.29317	M-H-H2O	p-c
pRPLC_180.0654_2	C15606	10.0977	M+NH4	p-c
