# Supplementary material for: Precision environmental health monitoring by longitudinal exposome and multi-omics profiling
Source: Genome Res. 2022 Jun;32(6):1199–214. doi: 10.1101/gr.276521.121 (PMC9248886; doi:10.1101/gr.276521.121)
Supplement: Supplemental Material [file supp_gr.276521.121_Supplemental_Data_S9.xlsx]

## Sheet: Blood test
Supplemental Data S9. The contributions of the exposome on blood tests and cytokines.
Variable ID	True name	Exposome (chemical)	Exposome (biological)	Environment	Other
Hemoglobin	Hemoglobin	20.9115	47.7841	31.3019	0.00260868
Total_Bilirubin	Total bilirubin	33.5375	46.4609	19.9199	0.0817375
Hemoglobin_A1c	Glycated hemoglobin	33.5375	46.4609	19.9199	0.0817375
HDL_Cholesterol	High-density lipoprotein	35.5452	44.7737	19.3487	0.332412
RBC	Red blood cell count	16.0324	51.9719	31.3699	0.625775
Glucose._Ser.Plas	Glucose	40.357	38.5364	20.1625	0.944147
EOS._.	Percentage of eosinophils	30.25	39.7603	28.8407	1.14897
ALT_.SGPT.._Ser.Plas	Alanine aminotransferase (serum glutamic pyruvic transaminase)	2.81379	84.5574	10.8894	1.73947
EOS._ABS	Absolute eosinophils	10.9349	72.0549	13.4827	3.52744
LYM._ABS	Absolute lymphocyte	20.2971	75.2369	0.405299	4.06075
AST_.SGOT.._Ser.Plas	Aspartate aminotransferase (serum glutamic oxaloacetic transaminase)	3.25942	82.208	10.4275	4.10515
Protein._Total._Ser.Plas	Total protein	19.2071	76.0092	0.353943	4.42977
Urea_Nitrogen.Ser.Plas	Urea nitrogen	19.2071	76.0092	0.353943	4.42977
Hematocrit	Hematocrit	11.9376	81.5479	2.00942	4.50513
MCH	Mean corpuscular hemoglobin	40.1326	40.9384	12.1667	6.7623
Platelet_count	Platelet	10.3725	78.0275	1.92433	9.6757
Albumin._Ser.Plas	Albumin	16.6463	70.7328	2.47635	10.1446
Alk_P.TASE._Total._Ser.Plas	Total alkaline phosphatase	11.9767	74.8962	0.421305	12.7058
CO2._Ser.Plas	Carbon dioxide	8.22635	68.3377	10.7031	12.7328
Creatinine._Ser.Plas	Creatinine	2.28684	74.8414	8.10028	14.7715
Non.HDL_Chol._Calc	Non-high-density lipoprotein cholesterol	38.1248	36.3585	10.3538	15.1629
Chloride._Ser.Plas	Chloride	31.0474	30.7014	15.0616	23.1896
BASO._.	Percentage of basophils	31.037	33.3583	10.2869	25.3178
Cholesterol.HDL_Ratio	Cholesterol to high-density lipoprotein ratio	15.2985	55.78	3.01004	25.9115
NEUT._.	Percentage of neutrophils	10.5122	46.8609	16.538	26.0889
Calcium._Ser.Plas	Calcium	29.0931	31.7695	12.5789	26.5584
RDW	Red blood cell distribution width	6.86975	62.6358	1.09801	29.3965
Sodium._Ser.Plas	Sodium	10.204	42.8981	16.6305	30.2674
MCV	Mean corpuscular volume	14.8397	48.7067	5.28925	31.1643
LDL.HDL_Ratio	Low-density lipoprotein to high-density lipoprotein ratio	4.86544	47.9768	10.0216	37.1362
Potassium._Ser.Plas	Potassium	22.7754	28.5637	11.3469	37.314
Cholesterol._Total	Total cholesterol	21.513	26.2014	10.0067	42.2788
NEUT._ABS	Absolute neutrophil	20.0519	13.9824	23.3249	42.6408
MONO._ABS	Absolute monocytes	5.39904	46.0666	5.62843	42.9059
LYM._.	Percentage of lymphocytes	8.66117	38.9657	8.51835	43.8548
eGFR	Estimated glomerular filtration rate	2.6104	45.2286	3.95832	48.2027
Anion_Gap	Anion gap	8.66616	36.4453	5.93352	48.955
MONO._.	Percentage ofmonocytes	2.79826	43.3683	3.82535	50.008
BASOS._ABS	Absolute basophils	11.3436	24.5246	11.8776	52.2543
Globulin	Globulin	11.3436	24.5246	11.8776	52.2543
WBC	White blood cell count	14.6467	20.4451	12.1542	52.7539
LDL_.Calculated.	Low-density lipoprotein	2.92876	29.9937	1.71154	65.366
MCHC	Mean corpuscular hemoglobin concentration	5.7581	28.1255	0.692118	65.4243

## Sheet: Cytokine
Supplemental Data S9. The contributions of the exposome on blood tests and cytokines.
Variable ID	Classification	Exposome (chemical)	Exposome (biological)	Environment	Other
GROA	Proinflammatory	34.6804	35.709	29.5998	0.0108074
IL2	Proinflammatory	36.2837	39.5147	24.1896	0.0120611
TGFA	Proinflammatory	21.049	66.3947	12.3311	0.225271
EGF	Proinflammatory	56.7523	30.3238	12.6616	0.262337
IL21	Proinflammatory	1.15138	77.4321	19.8482	1.56831
IL15	Proinflammatory	44.8184	45.4961	6.79918	2.88626
IL1B	Proinflammatory	38.9758	52.0832	5.84906	3.09195
MCP3	Proinflammatory	43.1618	43.6234	9.44344	3.77131
IL23	Proinflammatory	45.516	43.5651	6.88608	4.03281
CD40L	Proinflammatory	58.0154	21.3097	15.509	5.16582
IP10	Proinflammatory	2.01797	72.7949	18.4862	6.70089
MCP1	Proinflammatory	40.5666	35.7471	14.9431	8.74319
VCAM1	Proinflammatory	15.1581	57.5139	18.0893	9.23863
IL7	Anti-inflammatory	41.3599	43.3205	5.826	9.49354
ICAM1	Proinflammatory	52.9825	22.3794	14.0249	10.6132
FGFB	Anti-inflammatory	24.0738	46.6777	17.2167	12.0319
MIG	Proinflammatory	8.09171	61.6807	17.9147	12.3128
FASL	Proinflammatory	39.1656	40.1891	6.43035	14.2149
IL17A	Proinflammatory	36.5781	36.7943	11.6881	14.9394
NGF	Proinflammatory/Anti-inflammatory	38.0245	41.346	4.7169	15.9127
IL5	Proinflammatory/Anti-inflammatory	37.7517	40.4128	4.44869	17.3869
IL4	Anti-inflammatory	36.9295	39.2064	4.4913	19.3728
IL12P40	Proinflammatory	46.3179	21.2816	12.3335	20.067
IFNG	Proinflammatory	35.2463	38.1426	4.04997	22.5611
IL6	Proinflammatory/Anti-inflammatory	41.3303	25.859	9.98676	22.8239
IL31	Proinflammatory	37.5092	31.9432	0.381547	30.166
GCSF	Anti-inflammatory	37.3717	30.7999	0.655309	31.1731
TGFB	Proinflammatory/Anti-inflammatory	3.45898	46.4168	12.3828	37.7414
IL13	Anti-inflammatory	33.1634	27.0635	0.828776	38.9444
PDGFBB	Proinflammatory	30.6574	29.8715	0.398625	39.0724
IL9	Proinflammatory/Anti-inflammatory	25.5877	28.6867	1.10816	44.6175
IFNB	Proinflammatory/Anti-inflammatory	25.4999	25.7324	4.10952	44.6582
MCSF	Proinflammatory/Anti-inflammatory	23.0201	20.478	11.1294	45.3725
LIF	Proinflammatory	37.1792	5.44529	10.3924	46.983
IL27	Proinflammatory/Anti-inflammatory	28.542	22.5288	1.09449	47.8347
BDNF	Anti-inflammatory	22.1748	22.034	7.86529	47.9259
MIP1A	Proinflammatory	18.3737	22.1954	10.6455	48.7854
TRAIL	Proinflammatory/Anti-inflammatory	34.5523	4.37593	9.64115	51.4306
GMCSF	Proinflammatory/Anti-inflammatory	21.1615	22.9868	3.17735	52.6744
IL18	Proinflammatory	17.5642	17.9996	9.46082	54.9754
MIP1B	Proinflammatory	5.2055	28.6136	9.73614	56.4448
IL1RA	Anti-inflammatory	14.4591	19.452	9.20199	56.8869
RANTES	Proinflammatory	31.1973	1.16209	8.24658	59.394
IL8	Proinflammatory	24.7548	8.11899	4.20655	62.9197
VEGFD	Proinflammatory/Anti-inflammatory	17.0851	15.7648	0.441225	66.7089
LEPTIN	Proinflammatory	13.4246	16.798	0.615201	69.1622
IL17F	Proinflammatory	7.20102	19.5191	2.48178	70.7981
IL10	Anti-inflammatory	11.8817	10.475	6.39027	71.253
IL12P70	Proinflammatory	15.2179	10.5376	1.38142	72.8632
TNFA	Proinflammatory	12.6303	5.84999	5.37185	76.1478
TNFB	Proinflammatory	11.4365	11.3473	0.305063	76.9112
SDF1A	Proinflammatory	15.961	1.151	4.32727	78.5607
IL22	Proinflammatory/Anti-inflammatory	8.97018	10.9696	0.161039	79.8992
HGF	Anti-inflammatory	6.6106	10.372	2.31158	80.7058
IFNA	Proinflammatory	2.1146	9.38627	3.01763	85.4815
SCF	Proinflammatory/Anti-inflammatory	0.680662	5.63915	2.28538	91.3948
PAI1	Proinflammatory	1.40852	4.99919	1.86515	91.7271
VEGF	Proinflammatory	1.8894	3.36947	0.0591504	94.682
IL1A	Proinflammatory	1.42758	1.87735	1.5752	95.1199
RESISTIN	Anti-inflammatory	0.118118	1.96153	0.107692	97.8127
