# Supplementary material for: Precision environmental health monitoring by longitudinal exposome and multi-omics profiling
Source: Genome Res. 2022 Jun;32(6):1199–214. doi: 10.1101/gr.276521.121 (PMC9248886; doi:10.1101/gr.276521.121)
Supplement: Supplemental Material [file supp_gr.276521.121_Supplemental_Data_S10.xlsx]

## Sheet: Exposome chemical metabolome
Supplemental Data S10. The comparison between metabolite annotations from traditional methods and metabolic feature-based network analysis.
Peak	ID1	mz.error.x	Adduct.x	class	Name	mz	rt	Candidate.number	Compound.name	CAS.ID	HMDB.ID	KEGG.ID	Lab.ID	Adduct.y	mz.error.y	mz.match.score	RT.error	RT.match.score	CE	SS	Total.score	Database	Note
nHILIC_87.0087_4.4	C00022	1.20251	M-H	p-c	Pyruvate;Pyruvic acid;2-Oxopropanoate;2-Oxopropanoic acid;Pyroracemic acid																		NO
nHILIC_74.0246_9.6	C00037	0.991495	M-H	p-c	Glycine;Aminoacetic acid;Gly	74.0246	40	1	Glycine				T3D4318	(M-H)-	0.321022	0.999918				0	0.999918	t3db_ms1_database	Correct
nHILIC_132.0302_8.3	C00049	1.29317	M-H	p-c	L-Aspartate;L-Aspartic acid;2-Aminosuccinic acid;L-Asp																		NO
pHILIC_175.1188_15.1	C00062	1.75198	M+H	p-c	L-Arginine;(S)-2-Amino-5-guanidinovaleric acid;L-Arg	175.119	906	1	L-Arginine				HILIC_409	(M+H)+	0.45	0.999838	1.37004	0.998958		0	0.999398	msDatabase_hilic0.0.2	Correct
pHILIC_147.0763_9.7	C00064	1.6682	M+H	p-c	L-Glutamine;L-2-Aminoglutaramic acid	147.076	582	1	L-Glutamine				HILIC_46	(M+H)+	0.25	0.99995	12.9797	0.910651		0	0.955301	msDatabase_hilic0.0.2	Correct
pHILIC_150.0581_7	C00073	1.93596	M+H	p-c	L-Methionine;Methionine;L-2-Amino-4methylthiobutyric acid	150.058	420	1	L-Methionine	63-68-3	HMDB00696	C00073	HILIC_442	(M+H)+	1.3125	0.998623	5.66495	0.982329		0	0.990476	msDatabase_hilic0.0.2	Correct
nHILIC_131.0461_9.7	C00152	1.08215	M-H	p-c	L-Asparagine;2-Aminosuccinamic acid																		NO
nHILIC_103.0036_4	C00168	1.16594	M-H	p-c	Hydroxypyruvate;Hydroxypyruvic acid;3-Hydroxypyruvate;3-Hydroxypyruvic acid	103.004	30	1	Malonic acid	141-82-2	HMDB0000691	C04025	HMDB0000691	(M-H)-	0.14654	0.999983				0	0.999983	hmdbMS1Database0.0.1	Wrong
nHILIC_89.0243_5.8	C00186	1.07734	M-H	p-c	(S)-Lactate;L-Lactate;L-Lactic acid	89.0243	90	1	L-Lactic acid				T3D4253	(M-H)-	0.235145	0.999956				0	0.999956	t3db_ms1_database	Correct
nHILIC_87.0087_4.4	C00222	1.20251	M-H	p-c	3-Oxopropanoate;Malonate semialdehyde																		NO
nHILIC_87.0087_4.4	C00258	1.20251	M-H-H2O	p-c	D-Glycerate;Glycerate;(R)-Glycerate;Glyceric acid																		NO
pHILIC_114.0661_2.5	C00300	1.59229	M+H-H2O	p-c	Creatine;alpha-Methylguanidino acetic acid;Methylglycocyamine	114.066	150	1	Creatinine	60-27-5	HMDB00562	C00791	HILIC_438	(M+H)+	1.3125	0.998623	0	1		0	0.999311	msDatabase_hilic0.0.2	Coorect
pHILIC_104.0705_8.1	C00334	1.63403	M+H	p-c	4-Aminobutanoate;4-Aminobutanoic acid;4-Aminobutyrate;4-Aminobutyric acid;gamma-Aminobutyric acid;GABA	104.07	486	1	2-Aminobutyrate		HMDB00650	C02261	HILIC_471	(M+H)+	1.3125	0.998623	9.71704	0.948896		0	0.973759	msDatabase_hilic0.0.2	Isomer
nHILIC_103.0036_4	C00383	1.16594	M-H	p-c	Malonate;Malonic acid;Propanedioic acid	103.004	30	1	Malonic acid	141-82-2	HMDB0000691	C04025	HMDB0000691	(M-H)-	0.14654	0.999983				0	0.999983	hmdbMS1Database0.0.1	Coorect
nHILIC_132.0302_8.3	C00402	1.29317	M-H	p-c	D-Aspartate;D-Aspartic acid																		NO
nHILIC_130.0509_8.8	C00430	1.20457	M-H	p-c	5-Aminolevulinate;5-Amino-4-oxopentanoate;5-Amino-4-oxovaleric acid	130.051	0	1	5-Aminolevulinic acid				T3D4273	(M-H)-	0.107897	0.999991				0	0.999991	t3db_ms1_database	Coorect
nHILIC_157.0366_6.1	C00499	1.08732	M-H-H2O	p-c	Allantoate;Allantoic acid																		NO
nHILIC_349.0752_8.5	C00921	15.9778	M+Cl	p-c	Dihydropteroate;7,8-Dihydropteroate																		NO
nHILIC_261.0725_10.7	C00931	20.7257	M+Cl	p-c	Porphobilinogen																		NO
nHILIC_103.0036_4	C01146	1.16594	M-H	p-c	2-Hydroxy-3-oxopropanoate;Tartronate semialdehyde	103.004	30	1	Malonic acid	141-82-2	HMDB0000691	C04025	HMDB0000691	(M-H)-	0.14654	0.999983				0	0.999983	hmdbMS1Database0.0.1	Isomer
nHILIC_130.0509_8.8	C01165	1.20457	M-H	p-c	L-Glutamate 5-semialdehyde;L-Glutamate gamma-semialdehyde	130.051	0	1	5-Aminolevulinic acid				T3D4273	(M-H)-	0.107897	0.999991				0	0.999991	t3db_ms1_database	Isomer
nHILIC_177.0339_6.7	C01419	1.28023	M-H	p-c	Cys-Gly;L-Cysteinylglycine																		NO
pHILIC_147.0763_9.7	C01879	1.6682	M+NH4	p-c	Pidolic acid;5-Oxoproline;Pyroglutamic acid;5-Pyrrolidone-2-carboxylic acid;Pyroglutamate;5-Oxo-L-proline;L-Pyroglutamic acid;L-5-Pyrrolidone-2-carboxylic acid	147.076	582	1	L-Glutamine				HILIC_46	(M+H)+	0.25	0.99995	12.9797	0.910651		0	0.955301	msDatabase_hilic0.0.2	Wrong
nHILIC_129.0192_7.6	C02630	1.04076	M-H-H2O	p-c	2-Hydroxyglutarate;alpha-Hydroxyglutarate	129.019	90	1	Itaconate				HILIC_316	(M-H)-	0.275	0.999939	27	0.666977		0	0.833458	msDatabase_hilic0.0.2	Wrong
nHILIC_116.0352_7.5	C03508	1.07975	M-H	p-c	L-2-Amino-3-oxobutanoic acid;L-2-Amino-3-oxobutanoate;L-2-Amino-acetoacetate;(S)-2-Amino-3-oxobutanoic acid																		NO

## Sheet: Exposome biological metabolome
Supplemental Data S10. The comparison between metabolite annotations from traditional methods and metabolic feature-based network analysis.
from	to	mz.error.x	Adduct.x	class	Name	mz	rt	Candidate.number	Compound.name	CAS.ID	HMDB.ID	KEGG.ID	Lab.ID	Adduct.y	mz.error.y	mz.match.score	RT.error	RT.match.score	CE	SS	Total.score	Database	Note
nHILIC_87.0087_4.4	C00022	1.20251	M-H	p-c	Pyruvate;Pyruvic acid;2-Oxopropanoate;2-Oxopropanoic acid;Pyroracemic acid																		NO
nHILIC_146.0458_7.6	C00025	1.168	M-H	p-c	L-Glutamate;L-Glutamic acid;L-Glutaminic acid;Glutamate	146.046	60	1	L-Glutamic acid				T3D4296	(M-H)-	0.144453	0.999983				0	0.999983	t3db_ms1_database	Correct
pRPLC_181.0718_3.1	C00031	1.46691	M+H	p-c	D-Glucose;Grape sugar;Dextrose;Glucose;D-Glucopyranose																		NO
pRPLC_181.0719_3.4	C00031	1.71691	M+H	p-c	D-Glucose;Grape sugar;Dextrose;Glucose;D-Glucopyranose	181.072	204	1	Theophylline		HMDB0001889		RPLC_443	(M+H)+	1.3125	0.998623	4.52577	0.988685		0	0.993654	msDatabase_rplc0.0.2	Wrong
nHILIC_179.0561_7.6	C00031	1.34209	M-H	p-c	D-Glucose;Grape sugar;Dextrose;Glucose;D-Glucopyranose																		NO
nHILIC_74.0246_9.6	C00037	0.991495	M-H	p-c	Glycine;Aminoacetic acid;Gly	74.0246	40	1	Glycine				T3D4318	(M-H)-	0.321022	0.999918				0	0.999918	t3db_ms1_database	Correct
nHILIC_88.0403_8.9	C00041	1.11632	M-H	p-c	L-Alanine;L-2-Aminopropionic acid;L-alpha-Alanine	88.0403	80	1	L-Alanine				T3D4320	(M-H)-	0.196183	0.999969				0	0.999969	t3db_ms1_database	Correct
nHILIC_132.0302_8.3	C00049	1.29317	M-H	p-c	L-Aspartate;L-Aspartic acid;2-Aminosuccinic acid;L-Asp																		NO
pHILIC_175.1188_15.1	C00062	1.75198	M+H	p-c	L-Arginine;(S)-2-Amino-5-guanidinovaleric acid;L-Arg	175.119	906	1	L-Arginine				HILIC_409	(M+H)+	0.45	0.999838	1.37004	0.998958		0	0.999398	msDatabase_hilic0.0.2	Correct
pHILIC_147.0763_9.7	C00064	1.6682	M+H	p-c	L-Glutamine;L-2-Aminoglutaramic acid	147.076	582	1	L-Glutamine				HILIC_46	(M+H)+	0.25	0.99995	12.9797	0.910651		0	0.955301	msDatabase_hilic0.0.2	Correct
nHILIC_104.0352_9.7	C00065	1.07975	M-H	p-c	L-Serine;L-2-Amino-3-hydroxypropionic acid;L-3-Hydroxy-alanine;Serine	104.035	40	1	L-Serine				T3D4367	(M-H)-	0.232738	0.999957				0	0.999957	t3db_ms1_database	Correct
pHILIC_150.0581_7	C00073	1.93596	M+H	p-c	L-Methionine;Methionine;L-2-Amino-4methylthiobutyric acid	150.058	420	1	L-Methionine	63-68-3	HMDB00696	C00073	HILIC_442	(M+H)+	1.3125	0.998623	5.66495	0.982329		0	0.990476	msDatabase_hilic0.0.2	Correct
pHILIC_133.097_16.1	C00077	1.7568	M+H	p-c	L-Ornithine;(S)-2,5-Diaminovaleric acid;(S)-2,5-Diaminopentanoic acid;(S)-2,5-Diaminopentanoate	133.097	966	1	L-Ornithine				HILIC_401	(M+H)+	0.425	0.999856	19.8097	0.804116		0	0.901985	msDatabase_hilic0.0.2	Correct
pRPLC_181.0718_3.1	C00095	1.46691	M+H	p-c	D-Fructose;Levulose;Fruit sugar;D-arabino-Hexulose																		NO
pRPLC_181.0719_3.4	C00095	1.71691	M+H	p-c	D-Fructose;Levulose;Fruit sugar;D-arabino-Hexulose	181.072	204	1	Theophylline		HMDB0001889		RPLC_443	(M+H)+	1.3125	0.998623	4.52577	0.988685		0	0.993654	msDatabase_rplc0.0.2	Wrong
nHILIC_179.0561_7.6	C00095	1.34209	M-H	p-c	D-Fructose;Levulose;Fruit sugar;D-arabino-Hexulose																		NO
nHILIC_120.0124_7.6	C00097	1.18957	M-H	p-c	L-Cysteine;L-2-Amino-3-mercaptopropionic acid																		NO
nHILIC_88.0403_8.9	C00099	1.11632	M-H	p-c	beta-Alanine;3-Aminopropionic acid;3-Aminopropanoate	88.0403	80	1	L-Alanine				T3D4320	(M-H)-	0.196183	0.999969				0	0.999969	t3db_ms1_database	Correct
nHILIC_149.0455_8.2	C00121	1.25384	M-H	p-c	D-Ribose	149.046	90	1	1-Methylhypoxanthine				HILIC_8	(M-H)-	3.5	0.990248	15	0.882497		0	0.936372	msDatabase_hilic0.0.2	Isomer
pRPLC_181.0718_3.1	C00124	1.46691	M+H	p-c	D-Galactose;D-Galactopyranose																		NO
pRPLC_181.0719_3.4	C00124	1.71691	M+H	p-c	D-Galactose;D-Galactopyranose	181.072	204	1	Theophylline		HMDB0001889		RPLC_443	(M+H)+	1.3125	0.998623	4.52577	0.988685		0	0.993654	msDatabase_rplc0.0.2	Wrong
nHILIC_179.0561_7.6	C00124	1.34209	M-H	p-c	D-Galactose;D-Galactopyranose																		NO
nHILIC_154.0621_9.6	C00135	1.12113	M-H	p-c	L-Histidine;(S)-alpha-Amino-1H-imidazole-4-propionic acid																		NO
pRPLC_181.0718_3.1	C00137	1.46691	M+H	p-c	myo-Inositol;D-myo-Inositol;1D-myo-Inositol;L-myo-Inositol;1L-myo-Inositol;meso-Inositol;Inositol;Dambose;Cyclohexitol;Meat sugar;Bios I																		NO
pRPLC_181.0719_3.4	C00137	1.71691	M+H	p-c	myo-Inositol;D-myo-Inositol;1D-myo-Inositol;L-myo-Inositol;1L-myo-Inositol;meso-Inositol;Inositol;Dambose;Cyclohexitol;Meat sugar;Bios I	181.072	204	1	Theophylline		HMDB0001889		RPLC_443	(M+H)+	1.3125	0.998623	4.52577	0.988685		0	0.993654	msDatabase_rplc0.0.2	Wrong
nHILIC_179.0561_7.6	C00137	1.34209	M-H	p-c	myo-Inositol;D-myo-Inositol;1D-myo-Inositol;L-myo-Inositol;1L-myo-Inositol;meso-Inositol;Inositol;Dambose;Cyclohexitol;Meat sugar;Bios I																		NO
nHILIC_114.0559_7.8	C00148	0.991145	M-H	p-c	L-Proline;2-Pyrrolidinecarboxylic acid	114.056	40	1	L-Proline				T3D4411	(M-H)-	0.321342	0.999917				0	0.999917	t3db_ms1_database	Correct
nHILIC_133.0142_10.4	C00149	1.25419	M-H	p-c	(S)-Malate;L-Malate;L-Apple acid;L-Malic acid;L-2-Hydroxybutanedioic acid;Malate;Malic acid																		NO
nHILIC_131.0461_9.7	C00152	1.08215	M-H	p-c	L-Asparagine;2-Aminosuccinamic acid																		NO
pRPLC_153.0658_1.7	C00155	9.93355	M+NH4	p-c	L-Homocysteine;L-2-Amino-4-mercaptobutyric acid;Homocysteine	153.066	102	1	N1-Methyl-2-pyridone-5-carboxamide(1)		HMDB04193	C05842	RPLC_444	(M+H)+	1.3125	0.998623	26.9324	0.668329		0	0.833476	msDatabase_rplc0.0.2	Wrong
nHILIC_191.0197_11.2	C00158	1.30586	M-H	p-c	Citrate;Citric acid;2-Hydroxy-1,2,3-propanetricarboxylic acid;2-Hydroxytricarballylic acid																		NO
pRPLC_181.0718_3.1	C00159	1.46691	M+H	p-c	D-Mannose;Mannose;Seminose;Carubinose																		NO
pRPLC_181.0719_3.4	C00159	1.71691	M+H	p-c	D-Mannose;Mannose;Seminose;Carubinose	181.072	204	1	Theophylline		HMDB0001889		RPLC_443	(M+H)+	1.3125	0.998623	4.52577	0.988685		0	0.993654	msDatabase_rplc0.0.2	Wrong
nHILIC_179.0561_7.6	C00159	1.34209	M-H	p-c	D-Mannose;Mannose;Seminose;Carubinose																		NO
nHILIC_103.0036_7.7	C00168	1.16594	M-H	p-c	Hydroxypyruvate;Hydroxypyruvic acid;3-Hydroxypyruvate;3-Hydroxypyruvic acid	103.004	30	1	Malonic acid	141-82-2	HMDB0000691	C04025	HMDB0000691	(M-H)-	0.14654	0.999983				0	0.999983	hmdbMS1Database0.0.1	Isomer
nRPLC_165.092_7	C00179	3.25196	M+Cl	p-c	Agmatine;(4-Aminobutyl) guanidine	165.092	50	1	Cyromazine				Cyromazine	(M-H)-	5.75	0.973897				0	0.973897	list1_ms1_database	Wrong
nHILIC_89.0243_5.8	C00184	1.07734	M-H	p-c	Glycerone;Dihydroxyacetone;1,3-Dihydroxyacetone;1,3-Dihydroxy-2-propanone;1,3-Dihydroxypropan-2-one	89.0243	90	1	L-Lactic acid				T3D4253	(M-H)-	0.235145	0.999956				0	0.999956	t3db_ms1_database	Isomer
nHILIC_89.0243_5.8	C00186	1.07734	M-H	p-c	(S)-Lactate;L-Lactate;L-Lactic acid	89.0243	90	1	L-Lactic acid				T3D4253	(M-H)-	0.235145	0.999956				0	0.999956	t3db_ms1_database	Correct
pHILIC_179.0484_7.4	C00198	17.9079	M+H	p-c	D-Glucono-1,5-lactone;Gluconic lactone;Gluconic acid lactone;1,5-Gluconolactone;delta-Gluconolactone;D-Gluconolactone;Gluconolactone	179.048	444	1	Cys-Gly or Gly-Cys				HILIC_488	(M+H)+	1.3125	0.998623	6.90273	0.973876		0	0.98625	msDatabase_hilic0.0.2	Wrong
nHILIC_177.0404_7.8	C00198	1.21726	M-H	p-c	D-Glucono-1,5-lactone;Gluconic lactone;Gluconic acid lactone;1,5-Gluconolactone;delta-Gluconolactone;D-Gluconolactone;Gluconolactone																		NO
nHILIC_177.0339_6.7	C00198	15.0327	M-H	p-c	D-Glucono-1,5-lactone;Gluconic lactone;Gluconic acid lactone;1,5-Gluconolactone;delta-Gluconolactone;D-Gluconolactone;Gluconolactone																		NO
pRPLC_181.0718_3.1	C00221	1.46691	M+H	p-c	beta-D-Glucose																		NO
pRPLC_181.0719_3.4	C00221	1.71691	M+H	p-c	beta-D-Glucose	181.072	204	1	Theophylline		HMDB0001889		RPLC_443	(M+H)+	1.3125	0.998623	4.52577	0.988685		0	0.993654	msDatabase_rplc0.0.2	Wrong
nHILIC_179.0561_7.6	C00221	1.34209	M-H	p-c	beta-D-Glucose																		NO
nHILIC_87.0087_4.4	C00222	1.20251	M-H	p-c	3-Oxopropanoate;Malonate semialdehyde																		NO
nHILIC_195.051_8.7	C00257	1.30551	M-H	p-c	D-Gluconic acid;D-Gluconate;D-gluco-Hexonic acid																		NO
nHILIC_105.0192_7.8	C00258	1.04076	M-H	p-c	D-Glycerate;Glycerate;(R)-Glycerate;Glyceric acid	105.019	50	1	Glyceric acid				T3D4330	(M-H)-	0.2717	0.999941				0	0.999941	t3db_ms1_database	Correct
pRPLC_181.0718_3.1	C00267	1.46691	M+H	p-c	alpha-D-Glucose																		NO
pRPLC_181.0719_3.4	C00267	1.71691	M+H	p-c	alpha-D-Glucose	181.072	204	1	Theophylline		HMDB0001889		RPLC_443	(M+H)+	1.3125	0.998623	4.52577	0.988685		0	0.993654	msDatabase_rplc0.0.2	Wrong
nHILIC_179.0561_7.6	C00267	1.34209	M-H	p-c	alpha-D-Glucose																		NO
pHILIC_132.0766_9	C00300	1.75404	M+H	p-c	Creatine;alpha-Methylguanidino acetic acid;Methylglycocyamine	132.077	540	1	Creatine				HILIC_416	(M+H)+	0.45	0.999838	4.02907	0.991022		0	0.99543	msDatabase_hilic0.0.2	Correct
nHILIC_191.0197_11.2	C00311	1.30586	M-H	p-c	Isocitrate;Isocitric acid;1-Hydroxytricarballylic acid;1-Hydroxypropane-1,2,3-tricarboxylic acid																		NO
nHILIC_174.0883_10.1	C00327	1.08421	M-H	p-c	L-Citrulline;2-Amino-5-ureidovaleric acid;Citrulline																		NO
pHILIC_180.0865_7.4	C00329	1.74411	M+H	p-c	D-Glucosamine;Chitosamine;2-Amino-2-deoxy-D-glucose	180.087	444	1	Hexosamine				HILIC_453	(M+H)+	1.3125	0.998623	6.90273	0.973876		0	0.98625	msDatabase_hilic0.0.2	Isomer
pHILIC_104.0705_8.1	C00334	1.63403	M+H	p-c	4-Aminobutanoate;4-Aminobutanoic acid;4-Aminobutyrate;4-Aminobutyric acid;gamma-Aminobutyric acid;GABA	104.07	486	1	2-Aminobutyrate		HMDB00650	C02261	HILIC_471	(M+H)+	1.3125	0.998623	9.71704	0.948896		0	0.973759	msDatabase_hilic0.0.2	Isomer
pRPLC_277.0384_5.1	C00345	14.853	M+H	p-c	6-Phospho-D-gluconate	277.038	306	1	Dihydroferulic acid				RPLC_455	(M+H)+	1.3125	0.998623	5.12449	0.985517		0	0.99207	msDatabase_rplc0.0.2	Isomer
pRPLC_283.1541_8.3	C00378	18.5473	M+NH4	p-c	Thiamine;Thiamin;Vitamin B1;Aneurin;Antiberiberi factor																		NO
nHILIC_103.0036_7.7	C00383	1.16594	M-H	p-c	Malonate;Malonic acid;Propanedioic acid	103.004	30	1	Malonic acid	141-82-2	HMDB0000691	C04025	HMDB0000691	(M-H)-	0.14654	0.999983				0	0.999983	hmdbMS1Database0.0.1	Correct
nHILIC_261.0725_10.7	C00386	7.35777	M+Cl	p-c	Carnosine;Nalpha-(beta-alanyl)-L-histidine																		NO
nHILIC_132.0302_8.3	C00402	1.29317	M-H	p-c	D-Aspartate;D-Aspartic acid																		NO
nHILIC_130.0509_8.8	C00430	1.20457	M-H	p-c	5-Aminolevulinate;5-Amino-4-oxopentanoate;5-Amino-4-oxovaleric acid	130.051	0	1	5-Aminolevulinic acid				T3D4273	(M-H)-	0.107897	0.999991				0	0.999991	t3db_ms1_database	Correct
pHILIC_175.1076_8.9	C00437	1.66855	M+H	p-c	N-Acetylornithine;N2-Acetyl-L-ornithine																		NO
nHILIC_173.0567_7.6	C00439	1.1704	M-H	p-c	N-Formimino-L-glutamate;N-Formimidoyl-L-glutamate																		NO
nHILIC_129.0192_7.6	C00490	1.04076	M-H	p-c	Itaconate;Itaconic acid;Methylenesuccinic acid	129.019	90	1	Itaconate				HILIC_316	(M-H)-	0.275	0.999939	27	0.666977		0	0.833458	msDatabase_hilic0.0.2	Correct
nHILIC_485.1492_3.9	C00492	2.97941	M-H-H2O	p-c	Raffinose;Melitose;Melitriose;Gossypose;6G-alpha-D-galactosylsucrose																		NO
nHILIC_157.0366_6.1	C00499	1.08732	M-H-H2O	p-c	Allantoate;Allantoic acid																		NO
pHILIC_152.0705_7.6	C00547	1.63403	M+H-H2O	p-c	L-Noradrenaline;Noradrenaline;Norepinephrine;Arterenol;4-[(1R)-2-Amino-1-hydroxyethyl]-1,2-benzenediol	152.071	456	1	Tetrahydrophthalimide				Tetrahydrophthalimide	(M+H)+	0.25	0.99995				0	0.99995	list2_ms1_database	Wrong
nHILIC_89.0243_5.8	C00577	1.07734	M-H	p-c	D-Glyceraldehyde	89.0243	90	1	L-Lactic acid				T3D4253	(M-H)-	0.235145	0.999956				0	0.999956	t3db_ms1_database	Isomer
pHILIC_152.0705_7.6	C00603	8.42281	M+NH4	p-c	(-)-Ureidoglycolate;(S)-Ureidoglycolate	152.071	456	1	Tetrahydrophthalimide				Tetrahydrophthalimide	(M+H)+	0.25	0.99995				0	0.99995	list2_ms1_database	Wrong
nHILIC_104.0352_9.7	C00740	1.07975	M-H	p-c	D-Serine	104.035	40	1	L-Serine				T3D4367	(M-H)-	0.232738	0.999957				0	0.999957	t3db_ms1_database	Isomer
pHILIC_139.0501_7.6	C00785	1.63127	M+H	p-c	Urocanate;Urocanic acid	139.05	456	1	Urocanic acid				HILIC_104	(M+H)+	0.32	0.999918	0.700684	0.999727		0	0.999823	msDatabase_hilic0.0.2	Correct
pHILIC_166.0861_6.2	C00788	1.75921	M+H-H2O	p-c	L-Adrenaline;(R)-(-)-Adrenaline;(R)-(-)-Epinephrine;(R)-(-)-Epirenamine;(R)-(-)-Adnephrine;4-[(1R)-1-Hydroxy-2-(methylamino)ethyl]-1,2-benzenediol	166.086	372	1	L-Phenylalanine	63-91-2	HMDB00159	C00079	HILIC_443	(M+H)+	1.3125	0.998623	4.44764	0.98907		0	0.993847	msDatabase_hilic0.0.2	Wrong
nHILIC_181.0717_3.5	C00794	1.21691	M-H	p-c	D-Sorbitol;D-Glucitol;L-Gulitol;Sorbitol																		NO
nHILIC_349.0752_8.5	C00921	15.9778	M+Cl	p-c	Dihydropteroate;7,8-Dihydropteroate																		NO
nHILIC_261.0725_10.7	C00931	20.7257	M+Cl	p-c	Porphobilinogen																		NO
nHILIC_144.0302_7.2	C00940	1.29317	M-H	p-c	2-Oxoglutaramate;2-Oxoglutaramic acid;alpha-Ketoglutaramate;2-Ketoglutaramate																		NO
pRPLC_181.0718_3.1	C00984	1.46691	M+H	p-c	alpha-D-Galactose																		NO
pRPLC_181.0719_3.4	C00984	1.71691	M+H	p-c	alpha-D-Galactose	181.072	204	1	Theophylline		HMDB0001889		RPLC_443	(M+H)+	1.3125	0.998623	4.52577	0.988685		0	0.993654	msDatabase_rplc0.0.2	Wrong
nHILIC_179.0561_7.6	C00984	1.34209	M-H	p-c	alpha-D-Galactose																		NO
nHILIC_160.0251_10.4	C01044	1.2566	M-H	p-c	N-Formyl-L-aspartate																		NO
nHILIC_103.0036_7.7	C01146	1.16594	M-H	p-c	2-Hydroxy-3-oxopropanoate;Tartronate semialdehyde	103.004	30	1	Malonic acid	141-82-2	HMDB0000691	C04025	HMDB0000691	(M-H)-	0.14654	0.999983				0	0.999983	hmdbMS1Database0.0.1	Isomer
pHILIC_170.0923_8.5	C01152	1.62921	M+H	p-c	N(pi)-Methyl-L-histidine;N-pros-Methyl-L-histidine;3-Methylhistidine;1-Methylhistidine	170.092	510	1	1-Methylhistidine		HMDB00001	C01152	HILIC_470	(M+H)+	1.3125	0.998623	11.5552	0.928505		0	0.963564	msDatabase_hilic0.0.2	Isomer
nHILIC_168.0778_10.2	C01152	1.24596	M-H	p-c	N(pi)-Methyl-L-histidine;N-pros-Methyl-L-histidine;3-Methylhistidine;1-Methylhistidine	168.078	80	1	Diphenylamine				Diphenylamine	(M-H)-	10	0.923116				0	0.923116	list2_ms1_database	Isomer
nHILIC_130.0509_8.8	C01157	1.20457	M-H	p-c	Hydroxyproline;L-Hydroxyproline;trans-4-Hydroxy-L-proline	130.051	0	1	5-Aminolevulinic acid				T3D4273	(M-H)-	0.107897	0.999991				0	0.999991	t3db_ms1_database	Isomer
nHILIC_167.0349_1.3	C01161	1.16559	M-H	p-c	3,4-Dihydroxyphenylacetate;3,4-Dihydroxyphenylacetic acid;Homoprotocatechuate	167.035	70	1	5-Methoxysalicylic acid			HMDB01868	HILIC_835	(M-H)-	1.0625	0.999097	8	0.965069		0	0.982083	msDatabase_hilic0.0.2	Isomer
nHILIC_130.0509_8.8	C01165	1.20457	M-H	p-c	L-Glutamate 5-semialdehyde;L-Glutamate gamma-semialdehyde	130.051	0	1	5-Aminolevulinic acid				T3D4273	(M-H)-	0.107897	0.999991				0	0.999991	t3db_ms1_database	Isomer
pHILIC_179.0484_7.4	C01419	1.59495	M+H	p-c	Cys-Gly;L-Cysteinylglycine	179.048	444	1	Cys-Gly or Gly-Cys				HILIC_488	(M+H)+	1.3125	0.998623	6.90273	0.973876		0	0.98625	msDatabase_hilic0.0.2	Correct
nHILIC_177.0404_7.8	C01419	17.5302	M-H	p-c	Cys-Gly;L-Cysteinylglycine																		NO
nHILIC_177.0339_6.7	C01419	1.28023	M-H	p-c	Cys-Gly;L-Cysteinylglycine																		NO
nHILIC_181.0717_3.5	C01697	1.21691	M-H	p-c	Galactitol;Dulcitol;Dulcose																		NO
nHILIC_128.0352_7.6	C01879	1.07975	M-H	p-c	Pidolic acid;5-Oxoproline;Pyroglutamic acid;5-Pyrrolidone-2-carboxylic acid;Pyroglutamate;5-Oxo-L-proline;L-Pyroglutamic acid;L-5-Pyrrolidone-2-carboxylic acid	128.035	80	1	Naphthalene				Naphthalene	(M-H)-	23.4299	0.644571				0	0.644571	select_exposome_ms1_database	Isomer
nHILIC_245.0431_7.2	C02076	0.73595	M+Cl	p-c	Sedoheptulose;D-altro-Heptulose;D-Sedoheptulose;Volemulose	245.043	50	1	Pimpinellin				T3D0822	(M-H)-	6.05858	0.971062				0	0.971062	t3db_ms1_database	Wrong
nHILIC_221.0665_7.7	C02291	17.2433	M-H	p-c	L-Cystathionine	221.066	10	1	Aldicarb sulfone				Aldicarb sulfone	(M-H)-	17	0.793581				0	0.793581	list1_ms1_database	Isomer
pRPLC_181.0718_3.1	C02336	1.46691	M+H	p-c	beta-D-Fructose;beta-Fruit sugar;beta-D-arabino-Hexulose;beta-Levulose;Fructose																		NO
pRPLC_181.0719_3.4	C02336	1.71691	M+H	p-c	beta-D-Fructose;beta-Fruit sugar;beta-D-arabino-Hexulose;beta-Levulose;Fructose	181.072	204	1	Theophylline		HMDB0001889		RPLC_443	(M+H)+	1.3125	0.998623	4.52577	0.988685		0	0.993654	msDatabase_rplc0.0.2	Isomer
nHILIC_179.0561_7.6	C02336	1.34209	M-H	p-c	beta-D-Fructose;beta-Fruit sugar;beta-D-arabino-Hexulose;beta-Levulose;Fructose																		NO
nHILIC_147.0297_10.2	C02630	0.879012	M-H	p-c	2-Hydroxyglutarate;alpha-Hydroxyglutarate	147.03	70	1	L-2-Hydroxyglutaric acid				T3D4247	(M-H)-	0.433415	0.99985				0	0.99985	t3db_ms1_database	Correct
nHILIC_116.0352_7.5	C03508	1.07975	M-H	p-c	L-2-Amino-3-oxobutanoic acid;L-2-Amino-3-oxobutanoate;L-2-Amino-acetoacetate;(S)-2-Amino-3-oxobutanoic acid																		NO
pHILIC_157.0607_8.3	C03680	1.54302	M+H	p-c	4-Imidazolone-5-propanoate;4-Imidazolone-5-propionic acid;4,5-Dihydro-4-oxo-5-imidazolepropanoate																		NO
nRPLC_151.04_2.3	C04043	1.20216	M-H	p-c	3,4-Dihydroxyphenylacetaldehyde;Protocatechuatealdehyde	151.04	10	1	Methyl paraben				Methyl paraben	(M-H)-	0.75	0.99955				0	0.99955	list1_ms1_database	Isomer
nHILIC_128.0352_7.6	C04281	1.07975	M-H	p-c	L-1-Pyrroline-3-hydroxy-5-carboxylate;3-Hydroxy-L-1-pyrroline-5-carboxylate;(3R,5S)-1-Pyrroline-3-hydroxy-5-carboxylate	128.035	80	1	Naphthalene				Naphthalene	(M-H)-	23.4299	0.644571				0	0.644571	select_exposome_ms1_database	Isomer
nHILIC_253.0927_3.2	C05401	0.893413	M-H	p-c	3-beta-D-Galactosyl-sn-glycerol;Galactosylglycerol																		NO
nHILIC_485.1492_3.9	C05404	2.97941	M-H-H2O	p-c	D-Gal alpha 1->6D-Gal alpha 1->6D-Glucose;D-Gal-alpha1->6D-Gal-alpha1->6D-Glucose;Manninotriose																		NO
nRPLC_151.04_2.3	C05576	1.20216	M-H-H2O	p-c	3,4-Dihydroxyphenylethyleneglycol	151.04	10	1	Methyl paraben				Methyl paraben	(M-H)-	0.75	0.99955				0	0.99955	list1_ms1_database	Wrong
nHILIC_167.0349_1.3	C05577	1.16559	M-H	p-c	3,4-Dihydroxymandelaldehyde;3,4-Dihydroxyphenylglycolaldehyde	167.035	70	1	5-Methoxysalicylic acid			HMDB01868	HILIC_835	(M-H)-	1.0625	0.999097	8	0.965069		0	0.982083	msDatabase_hilic0.0.2	Isomer
nHILIC_183.0294_2.1	C05580	0.129013	M-H	p-c	3,4-Dihydroxymandelate;3,4-Dihydroxymandelic acid;Dihydroxymandelic acid																		NO
nRPLC_165.0556_2.3	C05581	1.07699	M-H	p-c	3-Methoxy-4-hydroxyphenylacetaldehyde;(4-Hydroxy-3-methoxyphenyl)acetaldehyde;Homovanillin	165.056	50	1	Ethyl paraben				Ethyl paraben	(M-H)-	0.25	0.99995				0	0.99995	list1_ms1_database	Isomer
nRPLC_165.0557_3.2	C05581	1.32699	M-H	p-c	3-Methoxy-4-hydroxyphenylacetaldehyde;(4-Hydroxy-3-methoxyphenyl)acetaldehyde;Homovanillin	165.056	50	1	Ethyl paraben				Ethyl paraben	(M-H)-	0	1				0	1	list1_ms1_database	ISomer
nHILIC_181.0506_6.2	C05582	1.29041	M-H	p-c	Homovanillate;Homovanillic acid;3-Methoxy-4-hydroxyphenylacetate																		NO
nHILIC_181.0506_6.2	C05583	1.29041	M-H	p-c	3-Methoxy-4-hydroxyphenylglycolaldehyde																		NO
nHILIC_179.0348_2.2	C05584	0.915588	M-H-H2O	p-c	3-Methoxy-4-hydroxymandelate;Vanillylmandelic acid																		NO
pHILIC_132.0766_9	C05587	11.8109	M+H-2H2O	p-c	3-Methoxytyramine	132.077	540	1	Creatine				HILIC_416	(M+H)+	0.45	0.999838	4.02907	0.991022		0	0.99543	msDatabase_hilic0.0.2	Wrong
pHILIC_166.0861_6.2	C05589	1.75921	M+H-H2O	p-c	L-Normetanephrine	166.086	372	1	L-Phenylalanine	63-91-2	HMDB00159	C00079	HILIC_443	(M+H)+	1.3125	0.998623	4.44764	0.98907		0	0.993847	msDatabase_hilic0.0.2	Wrong
nRPLC_165.0556_2.3	C05594	1.07699	M-H-H2O	p-c	3-Methoxy-4-hydroxyphenylethyleneglycol	165.056	50	1	Ethyl paraben				Ethyl paraben	(M-H)-	0.25	0.99995				0	0.99995	list1_ms1_database	Isomer
pHILIC_147.1128_11.2	C05665	1.38197	2M+H	p-c	3-Aminopropanal;beta-Aminopropion aldehyde																		NO
nHILIC_146.0458_7.6	C05938	1.168	M-H	p-c	L-4-Hydroxyglutamate semialdehyde	146.046	60	1	L-Glutamic acid				T3D4296	(M-H)-	0.144453	0.999983				0	0.999983	t3db_ms1_database	Isomer
nHILIC_144.0302_7.2	C05947	1.29317	M-H-H2O	p-c	L-erythro-4-Hydroxyglutamate																		NO
pRPLC_180.0654_2	C15606	10.0977	M+NH4	p-c	1,2-Dihydroxy-5-(methylthio)pent-1-en-3-one																		NO
