# Supplementary material for: Precision environmental health monitoring by longitudinal exposome and multi-omics profiling
Source: Genome Res. 2022 Jun;32(6):1199–214. doi: 10.1101/gr.276521.121 (PMC9248886; doi:10.1101/gr.276521.121)
Supplement: Supplemental Material [file supp_gr.276521.121_Supplemental_Table_S1.docx]

**Supplemental Table S1. Adducts list for metabolites annotation in this study.**

| **LC-HRMS Mode** | **Adduct** |
| --- | --- |
| RPLC positive mode | (M+H)+, (M+H-H2O)+, (M+H-2H2O)+, (M+NH4)+, (M+Na)+, (M-H+2Na)+, (M-2H+3Na)+, (M+K)+, (M-H+2K)+, (M-2H+3K)+, (M+CH3CN+H)+, (M+CH3CN+Na)+, (2M+H)+, (2M+NH4)+, (2M+Na)+, (2M+K)+, (M+HCOO+2H)+ |
| RPLC negative mode | (M-H)-, (M-H2O-H)-, (M+Na-2H)-, (M+K-2H)-, (M+NH4-2H)-, (2M-H)-, (M+F)- |
| HILIC positive mode | (M+H)+, (M+H-H2O)+, (M+H-2H2O)+, (M+NH4)+, (M+Na)+, (M-H+2Na)+, (M-2H+3Na)+, (M+K)+, (M-H+2K)+, (M-2H+3K)+, (M+CH3CN+H)+, (M+CH3CN+Na)+, (2M+H)+, (2M+NH4)+, (2M+Na)+, (2M+K)+, (M+HCOO+2H)+ |
| HILIC negative mode | (M-H)-, (M-H2O-H)-, (M+Na-2H)-, (M+K-2H)-, (M+NH4-2H)-, (2M-H)-, (M+CH3COO)- |
